# Supplementary material for: Fibrous ginseng root biomass induces soil microbiome degradation by enriching ginseng pathogens
Source: Research Square preprint supplement (doi:10.21203/rs.3.rs-5322233/v1), 2025-02-12
Supplement: Supplementary file 1 [file 18b1edb84120aa9c64ddf207.xlsx]

## Sheet: Sheet1
ID	ITS
>OTU_1	AAGTCGTAACAAGGTTTCCGTAGGTGAACCTGCGGAAGGATCATTAGTGAACGCCCTTCATGGGCTTAAACTATTCCAAACCTCTGTGAACCGTGCCCTTCGGGGCTAATTTTACAAACATGGTGTAATGAACGTCATAACTTTAACAAAACAAAACTTTCAACAACGGATCTCTTGGCTCTCGCATCGATGAAGAACGCAAACAACGGTTCAAGGTCTTGGTCATTTAGAGGAAGTAAAAGTCGTAACAAGGTAACCGTAGGTGAACCTGCGGTTGGATCATTAGAAAATTTGAAGCTCTGCTTCAGAAACACTGTGTGCACCGTTATCTGTCTCTGGCAGGATCAGGGAAGCAGCAATGCTACCCCCCTGCCAAAGGAGTGGGGACTCCCCTCGTGG…
>OTU_10	AAGTCGTAACAAGGTTTCCGTAGGTGAACCTGCGGAAGGATCATTATTACGTATCCAACGTATAAACCAATCGTGAACTGTCTGCCGCTCAGGCCAGTAAGAGTTAACGCTCTTGCTGAGTTGGGAATCTGCTTTTGTTAATGTTTGAGGCCATGCACTCTAATCCGTAAAACGATTAGACTTTCTCCTAGTGATGAAGGAGTGAAGCTTGTGTGACTCTTACGCCTTGCGCAAAGCACTTGTGTTTTGTGCGAGGGACCAGATTCCCCGCTTGATGTCGGTTTTTTATTACCATCATCACTTTTCTTTCACCTTTTAAATGTTCCCCGTCCCTTGCCCTTTGTATCATGTTAAATGAACTGAACTATGTTTCCTCAGTTGCGCTTCTGTTCGATCTCC…
>OTU_100	AAGTCGTAACAAGGTCTCCGTAGGTGAACCTGCGGAGGGATCATTAACACTATTTGGCTGTGTTGGTTCCAGCAATGGTTCTACACACAGTTCAAATTCTATACACACTGTTGAACTCGGTTACCTTGCGTAGCCAATCCTCCCTTTGAATTGGAAATGTTGATGAACGGTTTGTAGTGGGATGACGCAAGTCATCGACTATTCATTGACTATCAAAGCTTGACTTTGAAATTTCCTTTTCTTAGGCAATTCATACTAACGTTTCCTCCACTATAGAAATGAACTCATTTCACTCCTTCGTACTCCAATTGACTGATCTCATTGCATTGTATGGAGAACCCGTAAGGGAACTCGATATAAAGCAGCCTTAAGATAATTCTTAAACTAAGCACAACTCTT…
>OTU_1000	AAGTCGTAACAAGGTTTCCGTAGGTGAACCTGCGGAAGGATCATTATCGAGTTTTGACCGGGTTGTAGCTGGCCTTCCGAGGCATGTGCACGCCCTGCTCATCCACTCTACACCTGTGCACTTACTGTGGGCTTCAGATTGCGAGGCACGCTCTTTACCGGGCTTGCGGAGCATATCTGTGCCTGCGTTTATCACAAACTCTATAAAGTAACAGAATGTGTATTGCGATGTAACACATCTATATACAACTTTCAGCAACGGATCTCTTGGCTCTC
>OTU_1001	GTTAACATTAAGCAATGAGTGCAAACTCGACTTAGTCATAGCAAGCCTCCACCCAAGGGTCGGTAAATCTTGTGCCAGCCACCGCGGTCATACAAGAGACCCAAATCAACTGTCCTACAAGCGGCGTAAAGAGTGGTAAGATGCCTATCCTACCTAACTAAGATCAAAATGCAACTAAGCTGTCGCAAGCACAAGATGCACCTAAACACACCATCAAGATGATCTTAGAAACTAGCGATTAATTTGAACCCACGAAAGCCAGGGCCCAAACTGGG
>OTU_1002	AAGTCGTAACAAGGTTTCCGTAGGTGAACCTGCGGAAGGATCATTACTGAATTGTCAACACGAGTTGTTGCTGGTCTTCAAACGGGGACACGTGCACACTCTGTTCACACATCCACTCACACCTGTGCACCCTCTGTAGTTCTGTGGCTTGTGGGGCTCTGTCCCCTTGCCGCGGTCCTGCGCCTTTACACACACTCTGTAATAAAGTCTTATGGAATGTAAATCGCGTCTAACGCAATACAATACAACTTTCAGCAACGGATCTCTTGGCTCTC
>OTU_1003	AAGTCGTAACAAGGTTTCCGTAGGTGAACCTGCGGAAGGATCATTATCACGTATCCACGTATAAACTTTATGAACTGTTCCCTTTGGAACAATGGGGATGGGGACCGTTGCTGTGTGCCTTCATTCTCAATTAACTTGTTCCACTGCGGTAAATCTCACAGCTTATTATTAACGCTTTTGTTCGTCGAACTGAACTGTTGGGTGTTGGCTCACGCCGCATCCAAGCGTTTTTAACAAACTTAAAACAATTCTTAACAACGGATATCTTGGTTCCC
>OTU_1004	AAGTCGTAGCAAGGTCTCCGTAGGTGAACCTGCGGAGGGATCATTAACGAGTTAGGGTCTTCTCAGGCCCGACCTCCCAACCCTTTGTTTACCCGACCCGTGTTGCTTCGGCGGGCCCGCCGTTTCGACGGCCGCCGGAGGACCGCCTATTCAGGTCCTCCGGCCCGCGCCCGCCGGTAGCCAATTCTACCAAACTCTTGAATCAAATCGTGTCCAATGTCTGAGTATATTACAAAATAAAAGCAAAACTTTCAACAACGGATCTCTTGGTTCTG
>OTU_1005	AAGTCGTAACAAGGTTTCCGTAGGTGAACCTGCGGAAGGATCATTAAAAAAGATTAGGTCTGATTCTTCATTCCAATCTCCACCCTGTGTATTTGTCCTTTGTACGCTTCCGTCCGGCGTGGGTCTTCGGATCCCCTCCTGTCTGGCCCAATCGTGGCTGGATTGGGAGTGCCTGGACGGGAGCCATTAGCAAACTCCATATTTAGTTGTACGTAATGTCTGAAAATGTTGCAAAGCAATATTTAAAACTTTCAACAACGGATCTCTTGGTTCTC
>OTU_1006	AAGTCGTAACAAGGTTTCCGTAGGTGAACCTGCGGAAGGATCATTACTGATTTAAAGATGTGCTGGCACTCCTTTACAGGTTTGCATGTGCACTCTGCAAAATCTCCTTCTCTTTACCCCATTGTGCACACCCCAGTAGGCAGCAGAGAAATCTTGTGTCATCTCTGTTTTGCCTATGTTTTTATCAAACACCAATAATTTTCAGAATGATATGTAGTAAGCTTTTAACAAGCTGAAATCTAATACAACTTTCAACAATGGATCTCTTGGTTCTC
>OTU_1007	AAGTCGTAACAAGGTCTCCGTTGGTGAACCAGCGGAAGGATCATTACCGAGTTAGGGTTTCGTCCGACGAGCCCGACCTCCCAACCCTTTGTCTATTATACCTTGTCGTTGCTTCGGCGGACCGGTCGCGACCAACTAGTCGTGGCCGCCGGGGCCCGTCCCTGGAAAGCGTCCGCCGACGGCCCAACCACAAACTCTTGTACCAAACCATGTCGTCTGAATTTACTTGATTAAAATCAAAAACAAAACTTTCAACAACGGATCTCTTGGTTCTG
>OTU_1008	GTAAAAGTCGTAACAAGGTTTCCGTAGGTGAACCTGCGGAAGGATCATTAAAAAATTACGCTCCGGCTAGAGTTTAAAACACTGGACGTCGGTGCCGTATTCAACCACTTGTATACTTGTACCTGTTGCTTCCGTGGAGTTACGGGTGCTCATCCTGTTCGCAGGTGTGAGTTACCTTCCACGGGTGTATTTTGAATTCATGTTTAGTTGATTGTTGTGTCTGAATTACTGTTTTAATAAAGTTAAAACTTTCAACAACGGATCTCTAGGTTCTC
>OTU_1009	AAGTCGTAACAAGGTTTCCGTAGGTGAACCTGCGGAAGGATCATTCATAATTGAGTGTTTTATGGCACTCTTTAAAAAATCCATATCCACCTTGTGTGCAACGTTTTTGGACTCTCTGGCGTTGATATCTCTCTGGTCCTCTAGGACTTTAGAGAAGGAAAACCAAGAGTTTGATTAACTTAACTTAACACCTTTAAAGCAGTTTGTCTGAATATCTATTTCTGAATAAACATAATTCAAAAATACAACTTTCAACAACGGATCTCTTGGCTCTC
>OTU_101	AAGTCGTAACAAGGTTTCCGTAGGTGAACCTGCGGAAGGATCATTAACACGTATCCAAACGTTAAAACCCCCCTGTGAACCTTTATTAGTGCGCCCCGTCACGTACCCGAGCCGTAGGATGTGGTAAATCATTGCGTAGTGGTGGGGTTCTCTCATTGCTACAGAGATTAGATTCAGGACCTACGGTTGGGTGACGGCTGCGAGCTAGAAGCGACTGGTAGCCTAAGCAATAACTTGTCTGACAGTGTCATTTATTGTGTAAGCTAACGCCTTAAGCGTGCACTGGCCAACACGGCTGGTGTCAGGTCCCGGGCCCTCGTGGCTCCCTACCACCCCATTTTCCGAGAAGAGGGCGATGGCCAAGTGGCTGGATACCCCATAAAAAAACGTACAACTGTT…
>OTU_1010	AAGTCGTAACAAGGTCTCCGTAGGTGAACCTGCGGAGGGATCATTACCGAGGATGGCGGCCCCTTAGGCCACCGCCTCACCACACTTTGCTTAAAccccccccTTTTCCGGGGCACCTGCTTCGGCCGACGGCCGGCTGGAAGGGAGCACGCTGCCGCCCAGCTGGCTCAAGGTCCTGTGGTGGGGCCCCCAAAACTAAAACCTGAGTATCAGTGTGTCTTAGGTGGCGAAAGCTGAACCAAACACAACCTACAACGATGGATCTCTTGGCTCTG
>OTU_1011	AAGTCGTAACAAGGTTTCCGTAGGTGAACCTGCGGAAGGATCATTATGAATTTGAACTTGCGTGTTGGTTGTTTCGAGCGAACGTTTGAACGCCTTCCGCAATTCTTTTTCTGTGAACTGTTCTTGAGCTTTTTGTCAATTCATTTTGATAAAAGCTTGGGTTACTTTTTTTGTTTTCTTGTATTATTCCACTTTATATTTTAAGTAGTTCTTGCAAAAGAATGAAAAAAATACATAAACCAAGACAACTTTCAGCAATGGATCTCTTGGCTCTT
>OTU_1012	AAGTCGTAACAAGGTTTCCGTAGGTGAACCTGCGGAAGGATCATTAACGTATCTAAGGTGTTCGGCCGAAAGCCCTGCTCCGATCGAAAGGTCGTGCAGCGGGCCGAAGCAGACGCCTAACCTTCACAAACCCACTGTGCACCTTCACGGCGGAGGCGGTCGGGCGAGAGCCTGGCTGCCGAAACCGTCTCACAAACACTAGTAATTAAGAATGTCAAAGCGACTCTGTCGCCCATTAAACATAACAACTTTCAACAACGGATCTCTTGGCTCTC
>OTU_1013	AAGTCGTAACAAGGTCTCCGTTGGTGAACCAGCGGAGGGATCATTACTAGAGCGCCGAAAGGCTGCTTAAAACCATCGCGAACCTATCCATCAGCGTTGCTTCGGCGGGAAGGTCCCGGGGCCGCGATTCTCGCGGGCCCGGGTCCGGGAACCCACCCTCTCCGGAGGTTGCGGGGCTCGCCTGCCGGAGGTACGAAACTCTTGTGCATCTCCGTGGATCTCTGAGTAAGCAAGCAAATAAGTTAAAACTTTCAACAACGGATCTCTTGGTTCTG
>OTU_1014	AAGTCGTAACAAGGTAACCGTAGGTGAACCTGCGGTTGGATCATTAAAAATCTTGGTTCTTGCAACCATCACATTGTGTGCTGCAACCGCCGTCCCTTTTGGGAGGTCCGTGCTGGAAAGTGGGGAAGGTCTTCAGAGACTTTCCATCACCGTCCACCGCTCCCAATGATTTTTTACAATCAACCTGTTGTTTTTGTTTCTCGTCTTACTTTTCCATATGTCACACTTTGTGAATGTATGAAAACAACTTTTGACAACGGATCTCTTGGCTCTC
>OTU_1015	AAGTCGTAACAAGGTTTCCGTAGGTGAACCTGCGGAAGGATCATTATCCATCTCAACCAGGTGCGGTCGCGGCCCTCGGGGGTTCTCTCCCGGGTGGTAGGGGTAACACCCTCACGCGCCGCATTCCTGCATCCttttttttACGAGCACCTTTCGTTCTCCTTCGGCGGGGCAACCTGCCGCTGGAACTTAACAAAACCTTTTTTGCATCTAGCATTACCTGTTCTGATACAAACAATCGTTACAACTTTCAACAATGGATCTCTTGGCTCTG
>OTU_1016	AAAGTCGTAACAAGGTTTCCGTAGGTGAACCTGCGGAAGGATCATTAAAAGTTTTAGTTATACTTCACGTATATACTTTAATAAACCCATTCCGAGTACCTTACCCGTTTGCTTCCGTGGAGCAGGACTTCGGTCCGTTCTGACTATGCCCTTGCGGCGTACGATGAGTCGTCTCCACGGGAGGTATACATTAAACTCTTGCATTTCCATGTCATCTGTCTGAATCTGTTTATAACAAATGTTAAAACTTTCAACAACGGATCTCTTGGTTCTC
>OTU_1017	AAGTCGTAACAAGGTTTCCGTAGGTGAACCTGCGGAAGGATCATTACTGAACTGTCGACATGAGCTGTTGCTGGTTTCCAAATGGGACACGTGCACGCTCTGTCAACATATCCACTCACACCTGTGCACCCTCTGTAGTCCCATTGCCTGGGGGGCTCCGCCCTCTTCGCGTGGTTCTACGCCTTTACACACACTCTGTAACAAAGTCTCATGGAATGTACACAGCGTTTAACGCAATACAATACAACTTTCAGCAACGGATCTCTTGGCTCTC
>OTU_1018	AAGTCGTAACAAGGTTTCCGTAGGTGAACCTGCGGAAGGATCATTATCGAGTTAGGGTCTTCTCGGCCCGACCTCCCAACCCTTTGTTAAAACTACCACTTGTTGCTTCGGCAGGCCCGTCCCCCTGTGGACCGCCGGCGGACCGCCGAAAGGCGTCCTCTGGCCTGCGCCTGTCGATAGCCCCCCCTTTCAAATTCTGAACAAAACGTGTCATGATCTGAGTCTATCACAAAAATTAAAGCAAAAACTTTCAACAACGGATCTCTTGGTTCTG
>OTU_1019	AAGTCGTAACAAGGTAACCGTAGGTGAACCTGCGGTTGGATCATTACAGAAAATGTTTTTCACAAAACATACACATTGCGCACTGTATTTGTCTCTGGCGGCGGGACAGCTATGGATTACAACTGTAGTTGTCTGTCAGTCATAGTGTAAAAGCTATGACCGTGGACAAACCGCCAAAATCATAACAACTTGTAATTTTGTGATTCTGTCTAATGAAGTTATTCGTATATATAATTATACAAACAACTTTTGGCAACGGATCTCTTGGCTCTCG
>OTU_102	AAGTCGTAACAAGGTTTCCGTAGGTGAACCTGCGGAAGGATCATTAACACGTATCCAACGTTAAACCCCCCTGTGAACTTTTATCGTGCTCTTGCAGCCCGGACCGGACAGCAATCCTGGTAAATCAGTCGCGAAAGTTGCCATTGATTCAGGACCTCTGTCTTCTGAGAAGTTATAGTTGCAATTGAGCGTTCGAGGCAAGTGGCTTGGTTTCCCAAAGCAATTGGCGTCTGATAGTGTCGCTGGTTGTCGAAGGATAACGCTTTACGATCGCTGTAGGCCGAACACCGGCCGGCGACTAGGTCACCGGGCTCACGCCCCTTCATAACCCCACAGTTTGCTGTACCGCAACCACGACCAACGCAAGTGCACCGGCGTGGTTGAAAACGAACAACTGTT…
>OTU_1020	AAGTCGTAACAAGGTTTCCGTAGGTGAACCTGCGGAAGGATCATTATCACGTATCCACGTATAAACTTTGTGAACTGTTCCCTTTGGAACAATGGGTGTGGAGACCGTTGCTGTGTGTCTTCATTCCCAGCTATTTGTTCCACTGCGGTAAATCTCACAGCTTTATTATTAACGCTTTTGTTCGTCGAACTGAACTGTTGGGTGTCGGCTCACGCCGCATCCAAGCGTTTTAACAAACTTAAAACAATTCTTAACAACGGATATCTTGGTTCCC
>OTU_1021	AAGTCGTAACAAGGTCTCCGTTGGTGAACCAGCGGAGGGATCATTACAAGAAGCGCCGAAAGGCTGCTTATAACCATCGCGAACCTATCCATCAGCGTTGCTTCGGCGGGAGCGCTCGCGGGACCGGAGTCTCTCCGGGCCCCGGGCCGTGGACCCACCCCTCCGGGGCGTGGGGCCGCCCGCCGTCGGTACGAAACTCTTCTGTATCTTAGTGGCATCTCTGAGTAAACAAGCAAATAAGTTAAAACTTTCAACAACGGATCTCTTGGTTCTG
>OTU_1022	AAGTCGTAACAAGGTTTCCGTAGGTGAACCTGCGGAAGGATCATTATCGAGCCGCCAACGCGGGCCTCTGGTACTTCGGTGCCTTTGGGCCCCGTTGACAAATGGCCCAACCCTTGCTTCTTGACAACCATTGTCTCGGCGGTACCGCGCCTTTCGGGGCCAGCTGGATTCGTTCCGGCTTGAGTCCGCCAGAGAACCATTAAAAATCGTTTATCAGATCGTCTAAGAATGAAATAATTCAATAAAACTTTCAACAACGGATCTCTTGGTTCTG
>OTU_1023	AAGTCGTAACAAGGTTTCCGTAGGTGAACCTGCGGAAGGATCATTACTGAACTGTCGACATGAGCTGTTGCTGGTCTCCAAACGGGACATGTGCACGCTCTGTCAACACATCCACTCACACCTGTGCACCCTCTGTAGTCCCGTTGCCTGGGGGGCTCTGCCCCCCTGGTGTGGTTCTACGTCTTTACACATACTCTGTAACAAAGTCTCATGGAATGTGCATCGCGTATAACGCAATACAATACAACTTTCAGCAACGGATCTCTTGGCTCTC
>OTU_1024	AAGTCGTAACAAGGTTTCCGTAGGTGAACCTGCGGAAGGATCATTAAAATGTATAAAGCATATTCGTCATGAATATACTCTATAAACCCACTCTGTGTATCTTACCTGTTGCTTCCGTGAGTCGTTGACTTCTGTCACCTTGAAGGATCGGCCTTGGCCGTCAGTTGAGAGCACTCACGGGAGGTAATCAGTAAACCCTTGAATCATCATGCCTTCTGTCTGACTATGTTTATAACAAATGTTAAAACTTTCAACAACGGATCTCTTGGTTCTC
>OTU_1025	AAGTCGTAACAAGGTCTCCGTTGGTGAACCAGCGGAGGGATCATTACAGAGTTGCAAAACTCCCTAAACCATTGTGGACGCTACCTTTTAACGTTGCTTCGGCGGGCGGCCCGCTCCCCTGGAAAGCCCCTGTGGCCGCCCGGGGCTGCGAGccccccggccccccTCGCGGGGGCGCCCGCCGGAGGATACCCAACTCTTGATTATTTTAGGCCTCTCTGAGTCTTCTGTACTGAATAAGTCAAAACTTTCAACAACGGATCTCTTGGTTCTG
>OTU_1026	AAGTCGTAACAAGGTTTCCGTAGGTGAACCTGCGGAAGGATCATTACCGAATTGTCAACAAGAGTTGTTGCTGGTCCTCAAACGGGGGCATGTGCACGCTCTGTTCACACATCCACTCACACCCTGTGCACCCTCTGTAGTTCTATGGTTGGGGGGCCTGCCCTCCTGCTGTGGTTCTGCATCTTTACACACACACTGTAACAAAGTCTCATGGAATGCATGTCGCGTTTAACGCAATACAATACAACTTTCAGCAACGGATCTCTTGGCTCTC
>OTU_1027	AAGTCGTAACAAGGTTTCCGTAGGTGAACCTGCGGAAGGATCATTATCACGTATCCACGTATAAACCATTGTGAACCGTTTTTAACCTCTGCAAAACCGGCTGCCATGAATCGTAAAAAGTTTGTGACTGCCGGCTAGTAACAGAGCGTATTTACCTATTAACCATTTTAACCAATCTTTATAACTTTATGAACTAACTTTATTTTATACTCTTCGGAGATAAAATTCATTACGAAACAAAGAACAACTCTTAGCAACGGATATCTTGGTTCTC
>OTU_1028	AAGTCGTAACAAGGTTTCCGTAGGTGAACCTGCGGAAGGATCATTAACAATTCTGAGTGTTCACACATTCGAATTTCCACCCTGCGTACCTGTACCTGTAAGCTTCCGTTGGGCAGTGGGATCTCCGCAAGGCGGTCCCCCTCCTGGGTAGGCAAAAGCCATCTCGGGGGAGTACTGACGGTTGCCAACCAATCAAACCCTTTGTCGTTTAAATCTAGTCTGATAATGATTGATAAATCAATTAAAACTTTCAACAATGGATCTCTTGGTTCTC
>OTU_1030	AAGTCGTAACAAGGTAACCGTAGGTGAACCTGCGGTTGGATCATTAGAAAATTCTCGAAGCAAACGCTTCAGAAACACTGTGTGCACCGTTTTCTGTCTCTGGCAGGACCAGGGAGCAGCGATGCTCTCCCCTGCCAAAGGAGTGGGAGCTGCCCTTCGGGCGGCTTCCATTCTGATTTGAACAACCCTATGTTTGTTTCAATTTGTCTGAATAATTCTTCACCTAGTGTGAGAAATTGAAAACAACTTTTGGCAACGGATCTCTTGGCTCTCG
>OTU_1032	AAGTCGTAACAAGGTCTCCGTTGGTGAACCAGCGGAGGGATCATTACAAGAAGCGCCGAAAGGCTGCTTATAACCATCGCGAACCTATCCATCAGCGTTGCTTCGGCGGGAGCGCTCGCGGGACCGGAGTCTCTCCGGGCCCCGGGCCGTGGACCCACCCCCCCGGGGTGTGGGGCCGCCCGCCGGAGGTACGAAACTCTTTTGCATCTTTGTGGCATCTCTGAGTAAACAGACAAATAAGTTAAAACTTTCAACAACGGATCTCTTGGTTCTG
>OTU_1033	AAGTCGTAACAAGGTCTCCGTTGGTGAACCAGCGGAGGGATCATTACAGAGTTGCAAAACTCCCTAAACCATTGTGAACGTTACCTAAACCGTTGCTTcggcgggcggccccggggtttaccccccgggcggccccggggtttaccccccgggcgccccTGGGCCCCACCGCGGGCGCCCGCCGGAGGTCACCAAACTCTTGATAATTTATGGCCTCTCTGAGTCTTCTGTACTGAATAAGTCAAAACTTTCAACAACGGATCTCTTGGTTCTG
>OTU_1034	AAGTCGTAACAAGGTCTCCGTAGGTGAACCTGCGGAAGGATCATTATCGAGCCGCCGACGCGGGCCCGCGGTACTTCGGTGCCGTTGGGTCCCGTTGGCAAATGGCCCAACCCTTGCTTCTTGACAACCATTGTCTCGGCGGTACCGCGCCTTTCGGGGCCAGCTGGATTCGTTCCGGCTTGTGTCCGCCAGAGAACCAATAAAAATCGTTTATCAGATCGTCTAAGAGTGAAGTAATTCAATAAAACTTTCAACAACGGATCTCTTGGTTCTG
>OTU_1037	AAGTCGTAACAAGGTTTCCGTAGGTGAACCTGCGGAAGGATCATTACTGAATGTCGACACGAGTTGTTGCTGGCCCCTCGAAGGGGGGCATGTGCACGCTCTGTTTACACATCCACCCACACCTGTGCACCCTTTGTAGTTCTGTGGCGTGAGGGACCCTGTCCCTCTGCTGCGGTTCTACGTCTTTATACACACCCTGTAGTGAAGTCTTATGGAATGTGTGCCGCGTTTAACGCAATAAATACAACTCTCAGCAACGGATCTCTTGGCTCTC
>OTU_1038	AAGTCGTAACAAGGTCTCCGTCGGTGAACCAGCGGAGGGATCATTACCGAGTTTACAACTCCCAAACCCAATGTGAACGTTACCAAACTGTTGCCTCGGCGGGATCTCTGCCCCGGGTGCGTCGCAGCCCCGGACCAAGGCGCCCGCCGGAGGACCAACCAAAACTCTTATTGTATACCCCTCGCGGGTTTTTTATTATCTGAGCCATCTCGGCGCCCCTTGCGGGCGTTTCGAAAATGAATCAAAACTTTCAACAACGGATCTCTTGGTTCTG
>OTU_1039	AAGTCGTAACAAGGTTTCCGTAGGTGAACCTGCGGAAGGATCATTAACACAAAACtttttttttCTTGCCGCCTCCTTCCCTGGAGCTGCAGaaaaaaaaaTCCCCATATCCACCCCTTTTATACGAACGAAATTGCTTAACCCCAATTTCTCCTCTTTAttttttacttttttttACCCCATATACCAAACATGCGATAGACTGATATTATATTTTATCTGAAAGAATGATAAAATTGAAAAACAACTCTTAGCAACGGATATCTTGGCTCTC
>OTU_104	AAGTCGTAACAAGGTTTCCGTAGGTGAACCTGCGGAAGGATCATTAACAACGTATCCTAAACGTAAAAAACCCCCCCTGTGAACTTTCATAACCCGAGCTTGCTAGGCCCGCGAAATTCAGCAATCCCTGGTAAATCATTGTTGACCAGCTCTTTGAGTCAGGGATATCCGAACTAGTCGTGTGGATTAAGTTCCGTGAAGCAAGAGCGGTGAGGCAAGTGACCCGGTACCCCCAAGCAATCAATGTTCTGTCATTAGTTGATTGTAAGGGTGGCGCAGTAAACGATCGCTGGAGGCCACCACGGCAGGCGACTGGGTCAGCGAGCTCTGCTCCTTAATAACCCCACCTAAGGATTAGCTCGGCGAAAGCTTGAGCACCAAAAACTAATACGACTGTTA…
>OTU_1041	AAGTCGTAACAAGGTCTCCGTTGGTGAACCAGCGGAGGGATCATTACAGAGTTGCAAAACTCCCAAACCATCGTGAACATACCCAAATATCGTTGCTTCGGCGGGCGGCGGCCCCCCGGGGTTATCATCCCCGGGCGTCTGccccccggccccccccccTCCGACGGGGCGGGGGGGTGCCCGCCGGAGGTCCTACAACCATCGTATCTTATGTGGCCTCTCTGAGTTATAGTGAATGAAGTCAAAACTTTCAACAACGGATCTCTTGGTTCTG
>OTU_1042	AAGTCGTAACAAGGTTTCCGTAGGTGAACCTGCGGAAGGATCATTAACAAATCGTATGTGCTGCTTCGGCAGCATATTAACCCGAGCCTCGGCTGCAAAGCCAGGTTAGGTCTCTTTCCACACCTGTATATATATATGGTGTGTGGGGAGAGGGACTGACATATGAGGTGCTTCTGGCGCTGAATTGTCGGTCCACATAGACGCTTCTTTGTTTTGACAGATCTAGTTGACAACATAAAATTGACAACTTTTAACAATGGATCTCTTGGCTCTT
>OTU_1043	AAGTCGTAACAAGGTTTCCGTAGGTGAACCTGCGGAAGGATCATTACAGTGCCCGGTCGCCGCCCCCTAAAGGCTGGCGACCGAACAGGCCACCCTTGTCTACCTTACCACTGTTGCTTCGGCGGGACCGTCCCCTTAGGGGGGCGACCCGGGGCTGGCTTAACCGCCGTCCGGGCGAGCTCCCGCCAGAAGACACTTAAATTCTGTTGATCAGTGACTGTCTGAGATTATATTTAATCATTAAAACTTTCAACAACGGATCTCTTGGTTCCA
>OTU_1044	AAGTCGTAACAAGGTTTCCGTAGGTGAACCTGCGGAAGGATCATTATCGAGTTTTTGAAATGGGTTGTCGCTGGTCTCTTATGAGGCATGTGCACGCTCAGCTCATCCACTCCTAAACCCTATGTGCACCTATGTAGAGTTTGGTGAATGTCGGTCGAATGGCTGATAGGATCCTTCTCTATGTCTTTTATATAAACGCTTTAGTTATAGAATGTTACCTTGCATATTAATGCATTATTAGTATAACTTTCAGCAACGGATCTCTTGGCTCTC
>OTU_1045	AAGTCGTAACAAGGTTTCCGTAGGTGAACCTGCGGAAGGATCATTAACGAGTAACTGAACAGGTTGTAGCTGGCCTCTCGGGGCATGTGCACGCCTGGCTCATCCACTCTTCAACCTCTGTGCACTTGTTGTAGGTCGGTAGAAGAGCGAGCATCCTCTGATGCTTTGCTTGGAAGCCTTCCTATGTTTTACTACAAACGCTTCAGTTTAAGAATGTCTACCTGCGTATAACGCATCTATATACAACTTTCAGCAACGGATCTCTTGGCTCTC
>OTU_1046	AAGTCGTAACAAGGTTTCCGTAGGTGAACCTGCGGAAGGATCATTACCGAGTATAGGGACCTCCCTCGTGGAGGCCCCGAACTCCCACCCCGTGCTTACGTACCTCTGTTGCCTCGGCGGGCCCGCCGGGGGACTCTTAGTGAGTCCCTCCCGGCATCCGGCCCTCGCGCTGGACAGCGCCCGCCAGAGGACCAACCAAACTCGTCTTTGACCGGCAGTCTGAGTAAAATAACAAATAAGTTAAAACTTTCAACAACGGATCTCTTGGTTCTG
>OTU_1047	AAGTCGTAACAAGGTTTCCGTAGGTGAACCTGCGGAAGGATCATTATTGAATGAATGTAGAGTTGTGTTGTCGCTGGCTGGGATCGGATTAATTTCTGTTTCAGCATGTGCACGCCTTCTCTTTCATCCACACACACCTGTGCACTTGTGAGACTGGGGACTGTAAAAAGTCTTCAGTCTACTTAAATATACAAACTCCATTTAATTAAACTGAATGTAATTGATGTAACACATCATTAGAACTAAGTTTCAACAACGGATCTCTTGGCTCTC
>OTU_1048	AAGTCGTAACAAGGTTTCCGTAGGTGAACCTGCGGAAGGATCATTATCGAGCCGCCGACGCGGGCCCGCGGTACTTCGGTGCCGTTGGGTCCCGTAGGCAAATGGCCCAACCCTTGCTTCTTGACAACCATTGTCTCGGCGGTACCGCGCCTTTCGGGGCCAGCTGGATTCGTTCCGGCTTGTGTCCGCCAGAGAACCATTAAAACTCGTTTATCGGTTTGTCTAAAAATAAAATAATTAATAAAACTTTCAACAACGGATCTCTTGGTTCCG
>OTU_1049	AAGTCGTAACAAGGTTTCCGTAGGTGAACCTGCGGAAGGATCATTAAAGAGTTAGGGTCTTCTCAGGCCCGACCTCCCAACCCTTTGTCTATTGAACCCTTGTTGCTTCGGCGGGCCCGTCGTTATACGGCCGCCGGAGGACCGACTCCAGGTCCTCTGGCCCGCGCCCGCCGGTAGCCAAAATCACCAAACTCTTGAATAATCGTGTCTATGATGTCTGAGTACTTTTATTAAAATTAAGCAAAACTTTCAACAACGGATCTCTTGGTTCTG
>OTU_105	AAGTCGTAACAAGGTCTCCGTAGGTGAACCTGCGGAGGGATCATTAACACGTTCTTATACAACGTTTCCAACCAAACCGTGAACTTCTTAAATTATATAAACCCCGACCTGGGAGTTGAGAGAATCCTGTTTGAACTGTGCTCAGTGTAATGGGCATATTAAGCTTCACGGTTTAATATGCGAGTGCATTCAGACTAGAAAGTTTCGAGCTTTCAAGGCCTCTCTTCTTTCGGGCTAATTTTCACCATTACTTCCCCTTCATTCACTGGAGGTAATGGCAACCACAACCCCTTTCACCCCTTTATAACCACTTGACTGATACTGTTTTTATTCTTCATTCTTGATTGAATGAGGGTGGAAACAAAATATTTTAATCAAAATATCTAAGCACAACTCTTA…
>OTU_1050	AAGTCGTAACAAGGTTTCCGTAGGTGAACCTGCGGAAGGATCATTATCCATCAAACCAGGTGTGGCTGCGGCCCTCGGGGGCTTCCCCCCGGGCGGTAGAGGTAAAACTTGCACGCGCCACATGTCTGAATCCTTTCTTTACGAGCACCTTTTGTTCTCCTTCGGTGGGGCAACCTGCCGCTGGAACCCATCAAAACCCTTTTTTGCATCTAGCATTACCCGTTCCGATACAAACAATCGTTACAACTTTCAACAATGGATCTCTTGGCTCTG
>OTU_1051	AAGTCGTAACAAGGTAACCGTAGGTGAACCTGCGGTTGGATCATTAAAAAAGTTTGGTTTTAACAAACCGACACCTTCTGTGCACCTTTATCTGTCTTTGGTAAGTCGAGCTTCGGATTGGAAGGCAACTTCCGTATCCGGACTACCCTTGATCATATCTTGGGTTGGCTTGCCAAACATATCAACAAACTTATATTCCTTTTAATTTTGTATGTGTTAATCACTTTGATTAATTAAACTTAATAACTTTTGACAACGGATCTCTTGGCTCTC
>OTU_1052	AAGTCGTAACAAGGTTTCCGTAGGTGAACCTGCGGAAGGATCATTAATGAAACTTCAAAGTCGGCTTGTCTATCTGTGCTGGTGGAGACACATGTGCACGTTGGCAGGTCGCAAATCCACACACCTGTGCATCTATGACTCTGAGTACCACCGCTTTGCATGGCCCTCAGGGGCCTGGTACTCGAGTACTTTACACACTCTGAATGTAATGGAATGTCTTTTTGTACAATGTACAACTAAAAACAACTTTCAACAACGGATCTCTTGGCTCTC
>OTU_1053	AAGTCGTAACAAGGTTTCCGTAGGTGAACCTGCGGAAGGATCATTAAAAAAGTACGCCCCAGCTAAGGTGTAAAAACGCTGACTGCTGGTGGCTGTATTCAACCACTTGTTTACTTGTACCTGTTGCTTCCGTGGAGTTACGGGTGCTCGCCCTGTTCGCAGGTGTGGGTTACCTTCCACGGGTGTAATTTGAACGCTTGTTTAGTTGCATGTAGTGTCTGAATAACTATTTTAATAAAGTTAAAACTTTCAACAACGGATCTCTAGGTTCTC
>OTU_1054	AAGTCGTAACAAGGTTTCCGTAGGTGAACCTGCGGAAGGATCATTAACGAGTAAGGGTCTCTCCGGCCCGACCTCCCAACCCTTTGTCTACCTGACCCCTTGTTGCTTCGGCGAGCCCGTCCCTACGGACCGCCGGAGGGACCTTCATCGGCCCTCTGGCCAGCGCTCGTCGATAGCCAAAACTTTTTTAAAATCTATAACTAAACGTGTCTTAATCTAAGTACTATTTGTTAAATAAAAGCAAAACTTTCAACAACGGATCTCTTGGTTCTG
>OTU_1055	AAGTCGTAACAAGGTAACCGTAGGTGAACCTGCGGTTGGATCATTAATGAAATTTGGGTTGAGTGGCTGTTGCCCTCGATCGTCAACACCTTGTGAATTGTAATTGTATTTGGCAAGTGATGCAGCAGTTCGCTGCAGAATTTCGCTCCCCCTCTTTAAGAGGGTGGGGGAAAGCTTGTCCCTGAATCTAGACCATATTATATATATTTTAATCCTGAACAATAAATCAGCAAAATACTGAAACAACTTTTGGCAACGGATCTCTTGGCTCTC
>OTU_1057	AAGTCGTAACAAGGTTTCCGTAGGTGAACCTGCGGAAGGATCATTACTGAGTGCTCATGCCTCGTCGTTCCCTTGGGAATGTGCGGTGGCAGAACCTCCCACCCTGTGTAGACTTACCCATGTTGCTTTGGCAGGCCCGCCTCTCGTGGGCCGCTGGCGCCTGCGTGCGCTGGCCCGTGCCTGCCAGAGGTTTTTCAAATCTTGTTTTAACCATGTCGTCCGAGTTTATTGCAAATAAAAACAAAACTTTCAACAACGGATCTCTTGGTTCTG
>OTU_1058	AAGTCGTAACAAGGTCTCCGTTGGTGAACCAGCGGAGGGATCATTACCGAGTTTACAACTCCCAAACCCCTGTGAACATACCTATACGTTGCCTCGGCGGGATCTCTGCCCCGGGTGCGTCGCAGCCCCGGACCAAGGCGCCCGCCGGAGGACCAACCAAAACTCTTATTGTATACCCCCTCGCGGGTTTTTTACTATCTGAGCCATCTCGGCGCCCCTCGTGGGCGTTTCGAAAATGAATCAAAACTTTCAACAACGGATCTCTTGGTTCTG
>OTU_1059	AAGTCGTAACAAGGTTTCCGTAGGTGAACCTGCGGAAGGATCATTAAAAAGTTTGTCACATCGTGACCTACTCTTGTGCATCTGTTTACACGATCTTGGCAGCTTAGTGCAAACGGTATTTGCCTACTGTTTCACGTCTGCTGCAAAGCAGGAGCTGCCAATGGACAATTCTTGTCCAAACAAAACAAACTCTTAATTAAAACCAATGTCTGAACAAAACTATGATTGAATCATAATTTTAAACAACTTTTGACAACGGATCTCTTGGCTCTC
>OTU_106	AAGTCGTAACAAGGTTTCCGTAGGTGAACCTGCGGAAGGATCATTAACAACATATCCTAACTAAAAAACCCCCCTGTGAACTTTCAACCCCAAATCGCTTGATCCGAGTACCTCAGCAATCTCTGGTAAATCATTGTTGACCAGCTCTTTGAGTCAGGGATATCCGAACTAGTCGTGTGGATTAAGTTCCGTGAAGCAAGAGCGGTGAGGCAAGTGACCCGGTACCCCCAAGCAATCAATGTTCTGTCAGTGTCGTTGATTGTGTAAGGGTGGCGCAGTAAACGATCGCTGGAGGCCACCACGGCCGGCGACTGGGTCAGCGAGCTCTGCTCCTTAATAACCCCACCTAAGGATTAGCTCGGCGAAAGCTTGAGCACCAAAAACTAATACGACTGTTAA…
>OTU_1061	AAGTCGTAACAAGGTTTCCGTAGGTGAACCTGCGGAAGGATCATTAATGAAAAACTTTTCAAAAATAGTTTTTTTATATCCTCTTGTCTACCTACCATGTTGCTTCCACTGGACCTGTTTTACCTTATGTGTGAGACCTTTGGCTTGTGTGAATAACTCAAGTCAGGGAGTTGTCGGTGGCAAGACCATTTACCAAAACTTGATTAAAAACACATTGTCTGAATCTTTTGCTTCAATATAATAAAACTTTCAACAACGGATCTCTAGGCTCTT
>OTU_1063	AAGTCGTAACAAGGTTTCCGTAGGTGAACCTGCGGAAGGATCATTACTGGAAATATTCAAGGTTGTAGCTGGCCTTCCGGGGCATGTGCTCGCCTTGTTTCAAATCCATCTTACACCTGTGCACACTCTGTAGTCCTTGGGTTTCTTTTGGGGTCACACCCGGAGAGATTCTAGTTCTACGTATTTACACATACACTTTAAAAGTTTAGAATGTATTACTTGTGATAAAACACATTTAAAAACAACTTTCAACAACGGATCTCTTGGCTCTCG
>OTU_1064	AAGTCGTAACAAGGTTTCCGTAGGTGAACCTGCGGAAGGATCATTAATGAAACTTCAAAGTCGGCTCGTCTGTCTGTGCTGGTGGAGACACATGTGCACGTCGGCGAGTCGCAAATCCACACACACCTGTGCATCTATGACTCTGAGTACCGCTTTGCATGGCCCTCAGGGGCCTGGTACTCGAGTACTTTACACACTCTGAATGTAATGGAATGTCTTTTTGTACAATGTACAACTAAAAACAACTTTCAACAACGGATCTCTTGGCTCTC
>OTU_1065	AAGTCGTAACAAGGTTTCCGTAGGTGAACCTGCGGAAGGATCATTACCGAGTGTTTGGATGCCCCCTTCTTGGGGGTGTCCGTCCTCCCATCCGTGTCTATTGTACCCTGTTGCTTCGGCGGGCCCGCCCTCTTGTGGCCGCCGGGGGGCTTCCCTTGCCCCCGGGCCCGCGCCCGCCGGAGACCTCAACCATTGAACACTGTCTGAAGGTTGCAGTCTGAGTACCGATAAACAAATCGTTAAAACTTTCAACAACGGATCTCTTGGTTCCG
>OTU_1066	AAGTCGTAACAAGGTTTCCGTAGGTGAACCTGCGGAAGGATCATTACCAAAGAGTGAGCAATCGCTTTTCTACCTGCTCGGTGACCCTTCTGGGTCATTGACTGGTCAACCCTTTGTGAACCAAAAAACACTTTCGCTTCGGCAGCTGGGCCCTAACCGGTCCGTCAGCCTGCCGCTAGCACCCCTTCATAAACCTGTTTGTCAAAACATTGTCTGATAACCAAATTTTCGAATGAAAATCAAAACTTTCAACAACGGATCTCTTGGTTCCC
>OTU_1067	AAGTCGTAACAAGGTTTCCGTAGGTGAACCTGCGGAAGGATCATTAGTGAACTGAAAACTGGAGAGAGAGTAGTAAAATACTCTCTTTTCTTTTTTGTGAACTGAAGGTTGTTTGGCTGGAAAGAGTTTTGGGTAGTATTAGCTTTTGGGTTTGTTGCTGCTAGTACTACTCGGGAAAAGACTCTTTTTGGTTGCTCAACTTTTTACTGTTTGTATTCTTTTTTGACTTATTTTCAATAAGACAACTTTCAGCAATGGATCTCTTGGCTCTT
>OTU_1068	AAGTCGTAACAAGGTCTCCGTTGGTGAACCAGCGGAGGGATCATTACCGAGTTTACAACTCCCAAACCCATGTGAACATACCTACTGTTGCTTCGGCGGGATCTCTGCCCCGGGTGCGTCGCAGCCCCGGACCAAGGCGCCCGCCGGAGGACCAACCAAAACTCTTTTTGTATACCCCCTCGCGGGTTTTTTATAATCTGAGCCTTCTCGGCGCCTCTCGTAGGCGTTTCGAAAATGAATCAAAACTTTCAACAACGGATCTCTTGGTTCTG
>OTU_1069	AAGTCGTAACAAGGTTTCCGTAGGTGAACCTGCGGAAGGATCATTATCGAATAAAATCTAGGGTCGGTTGTCGCTGGTTCTTCTGAACATTGTGCACACCTTCTCTATTTTTTCTTTCATCCACACACCCCTTGTGCACTTGTGAGATGGAAGGGGGGCCGTAAACCCCTCTGCCGTCTACTCTCACATACAAACTCATTTAATTTAAACTGAATGTAATTGATGTAACACATCATTTGAACTAAGTTTCAACAACGGATCTCTTGGCTCTC
>OTU_107	AAGTCGTAACAAGGTTTCCGTAGGTGAACCTGCGGAAGGATCATTAACAACATATCCTAACTTAAAAACCCTGTGAACTTTCAACCCCAAATCGCTTGATCCCAGTACCTCAGCAATCTCTGGTAAATCATAGTGAACAGCTTTGATTCAGAGACCTCTGAATAACCTTGGGCGGTCGCGGTTGGTGAGGCAAGTGACCTGGTACCCTCAAGACCAGTGTTCAATGATCTGTCAGTGTTCATTGACTGGAATCAAACGTTCTGTCAGTGTGCGTTTGATTTGCAAGGGTGGCGCAGTAAACGGCCGGCGACTGGGTCAGCGAGCTTTGCTCCCACTGTTACTACTTACAAGATTTCCCAATTAGTGAAAGCTATTGGGCTATAACTAAACGACTGTTAA…
>OTU_1070	AAGTCGTAACAAGGTTTCCGTAGGTGAACCTGCGGAAGGATCATTAACAAATCATGTGTGCGCTGCAGGGTAAAACCTGTAGTTGCATATTAACCCGAACCCGCTTGCAGCAATGCACGGGCTAGGTGTGCATCCGAAAGGGTGTACGGCCGAGAGACAGCGAGTACGCGAGTGCTCCTGTATCAAAGCCAAATAGACGCTTGTATGTTTTGACAGAGTTTAGTTGACAACATTAAAATTGACAACTTTTAACAATGGATCTCTTGGCTCTT
>OTU_1071	AAGTCGTAACAAGGTAACCGTAGGTGAACCTGCGGTTGGATCATTAGAAAATTCTTGAAGCCAACGCTTCAGAAACACTGTGTGCACCGTTTTCTGTCTCTGGCAGGACCAGGGAGCAGCGATGCTCTCCCCTGCCAAAGGAGTGGGAGCTGCCTTCGGGCGGCTTCCATTCTGATTTGAACAACCCTTTGAATGTTTTTATTTGTCTGAATCATTCTTCACCTAGTGTGAGAAATTGAAAACAACTTTTGGCAACGGATCTCTTGGCTCTC
>OTU_1072	AAGTCGTAACAAGGTCTCCGTTGGTGAACCAGCGGAGGGATCATTACCGAGTTTACAACTCCCAAACCCAATGTGAACGTTACCAAACTGTTGCCTCGGCGGGATCTCTGCCCCGGGTGCGTCGCAGCCCCGGACCAAGGCGCCCGCCGGAGGACCAACCAAAACTCTTTTGTATACCCCCTCGCGGGTTTTTATATCTGAGCCATCTCGGCGCCTCTCGTAGGCGTTTCGAAAATGAATCAAAACTTTCAACAACGGATCTCTTGGTTCTG
>OTU_1073	AAGTCGTAACAAGGTCTCCGTAGGTGAACCTGCGGAGGGATCATTACACAAAAAATATGAAGGCTGTATGCGGCTGTGTCTCTTTCGGGGGGCCAGCTTTTGCGGAGGCTGAAATATTTTTCACCCATGTCTTTTGCGCACTTGTTGTTTCCTGGGCGGGTTTCGCCCGCCACCAGGACCACACCATAAACCTTTTTTATGCAGTTGCAATCAGCGTCAGTATAACAAATGTAAATCATTTACAACTTTCAACAACGGATCTCTTGGTTCTG
>OTU_1074	AAGTCGTAACAAGGTTTCCGTAGGTGAACCTGCGGAAGGATCATTACCGAGTTAGGGTTTGCTGAAATATTTGCGCCCGACCTCCAACCCTTTGCTTACTTGACCTTTTGTTGCTTCGGCAGGCCCGCCCTTCGGGGCCGCCGGGAGAGCCCAAAAACCTCCTGGTCAGCGTCTGTCGATGGCCCAAATTTAAACCCTTGCTTAAACGTGTCGTCTAAGTAATTGTTAAAACAAATAACTAAAAACTTTCAACAACGGATCTCTTGGTTCTG
>OTU_1075	AAGTCGTAACAAGGTTTCCGTAGGTGAACCTGCGGAAGGATCATTAAAAGTAATATGTATTCTGACGAATATACATTATAAACCCATCTGTGTATCTTACCCGTTGCTTCCGCGAGGCAGTGATATCTCGGTCACCTCCGAACGATGGCGAAAGCCCATCCGACGGGGAGCACTCGCGGGAGGTATACATTAAACTCTTGCATTTTTATGTCATCTGTCTGAACTGTTTATAACAAATGTTAAAACTTTCAACAACGGATCTCTTGGTTCTC
>OTU_1076	AAGTCGTAACAAGGTTTCCGTAGGTGAACCTGCGGAAGGATCATTATTAATTCTTCTAGTTAAGCGGCTGCGCGtttttattttttttttATTTAAAAACCGCAGCTGTTTTTCTTGTGAACTGGGGCCTGCTTTTGAAGTTTCAACGCTTTTCTGGCAGGCCTGTCGTTAATGCTCTTGTGTTAAttttttttgtttttgctttttttAAGCCTAACCGCTTAAGAAAAATAATTACAAGACAACTTTCAGCAATGGATCTCTTGGCTCTT
>OTU_1077	AAGTCGTAACAAGGTTTCCGTAGGTGAACCTGCGGAAGGATCATTACAAATCCACAAGTCACCCTCACCGGTCGACAACGTTGAACCCCAACCCCTCGGCGGATCTAACGCGAACCACGGGTCAGCCTCCGTAACAGGAGACTGTCCCCGCGGATCGTGCCCTGGAGAAGCCTCGAGGACCCTATTTGACCCCCTAGCTGAAACAAATGACCACGAATGTACCAACAATCACAACCTAGAAACAACTTATAACAATGGATCTCTAGGCTCTT
>OTU_1078	AAGTCGTAACAAGGTTTCCGTAGGTGAACCTGCGGAAGGATCATTAAAGAGTTAGGGTCTTCTCGGCCCGACCTCCCAACCCTTTGTTTACTTAACTATCGTTGCTTCGGCGGGCCCGTCATTTTCTCTTGACCGCCGGAGGGCCGTAAGACGCCCTCTGGTCCGCGCCCGTCGGTGGCCAACCATTTTTAAAACGCTTAAATAAACGTGTCTTTATCTGAGTACTATATTTAATAAAAGCAAAACTTTCAACAACGGATCTCTTGGTTCTG
>OTU_108	AGGAATATTGCGCAATGGATGAAAGTCTGACGCAGCGACGCCGCGTGGAGGATGAAGGCCCTTTGGGTTGTAAACTCCTGTAGAGTGGGAAGAATATCCCTTTTGAAGGGTTTGACGGTACCACTAAAGTAAGGATCGGCTAACTACGTGCCAGCAGCCGCGGTAATACGTAGGATCCGAGCGTTGTCCGGAATTACTGGGTGTAAAGGGAGCGCAGGCGGGTCTATAAGTCGACGGTGAAATCTTCGAGCTCAACTCGAAAACTGCCGCCGATACTGTAGGTCTTGAATATGTCAGAGGGAAACGGAATTCATGGTGTAGCGGTGAAATGCGTAGATATCATGAAGAACACCAGTCGCGAAGGCGGTTTCCTGGGACATTATTGACGCTCATGCTCGA…
>OTU_1084	AAGTCGTAACAAGGTTTCCGTAGGTGAACCTGCGGAAGGATCATTACCGAGTTAGGGTACGCTGTGTGCCCGACCTCCAACCCTTTGTCTACCTGACCAGATGTTGCTTCGGCAGGCCCGCCGCCCCGCGAGGGGCAGCCGCCGGGGGTCTTTACCGGCCCCGGGTCCGTGCCTGTCGATGGCCCTTCTAAAACTCTTGCTTAAAACGTGTCGTCTGAGtaaaacaaacaaaataaaaacaaaaaCTTTCAACAACGGATCTCTTGGTTCTG
>OTU_1085	AAGTCGTAACAAGGTCTCCGTTGGTGAACCAGCGGAGGGATCATTACCGAAGTTACTCTTCAAAACCCATTGTGAACCTTACCTCTTGCCGCGCGTTGCCTCGGCGGGGAGGCGGGGTCTGGGTCGGCgcgcccctcaccgggccgccgtccccgtccccgtccccgtccccgccggccgcgccAAACTCTAAATTTGAAAAAGCGTACTGCACGTTCTGATTCAAAACAAAAAACAAGTCAAAACTTTTAACAACGGATCTCTTGGTTCTG
>OTU_1087	AAGTCGTAACAAGGTTTCCGTAGGTGAACCTGCGGAAGGATCATTAAAAGTAAATATGTATTCTCCCGAATATACATTTCAAACCCCATCTGCGTACGTTACCCGTTGCTTCCGCGAGGCAGTGATCTCGGTCACCTCCAGAAGATGGCGAAGGCCATCCGACGGGGAGCACTCGCGAAAGGTATACATTAAACCCTTGCAATTCCATGCCATCTGTCTGAACCTGTTTATAACAAATGTTAAAACTTTCAACAACGGATCTCTTGGTTCTC
>OTU_1089	AAGTCGTAACAAGGTCTCCGTAGGTGAACCTGCGGAGGGATCATTACCGAGTTAGGGTCTCACCGGCCCGAATCTCCCAACCCTTTGTCTACTTGACCATCGTTGCTTCGGCGAGCCCGTCCTCACGGACCGCCGGGGGGTCTTTTGTACCCCTTGGCCCGCGCTCGTCGACAGCCCCCCCAATTTAAAAATTCTATAACTAAACGTGTCTTGAATCTAAGTATTATTGTTAAATAAAAACAAAACTTTCAACAACGGATCTCTTGGTTCTG
>OTU_109	AAGTCGTAACAAGGTTTCCGTAGGTGAACCTGCGGGAGGATCATTAACAACGTATCCTAAACGTAAAAAACCCCCCTGTGAACCTTCATAACCCGAGCTAGGCCCGCGAAATTCAGCAATCCCTGGTAAATCATTGTTGACCAGCTCTTTGAGTCAGGGATATCCGAACTAGTCGTGTGGATTAAGTTCCGTGAAGCAAGAGCGGTGAGGCAAGTGATCCGGGACCCCCAAGCAATCAATGTTCTGTCAGTGTCGTTGATTGTGTAAGGGTGGCGCAGTAAACGATCGCTGGAGGCCACCACGGCCGGCGACTGGGTCAGCGAGCTCTGCTCCTTAATAACCCCACCTAAGGATTAGCTCGGCGAAAGCTTGAGCACCAAAAACTAATACGACTGTTAA…
>OTU_1090	AAGTCGTAACAAGGTTTCCGTAGGTGAACCTGCGGAAGGATCATTAACGAGTTAGGGTCCCTCGTGGCCCGACCTCCCAACCCTTTGTCTACTTAACCACTGTTGCTTCGGCGAGCCCGTCTGTAATGGACCGCCGGGGGGTACCTTGATCGGCCCTCTGGTCAGCGCTCGTCGGTGGCCAAACTTTTAAAATCTTAACCAAACGTGCCTCAGTCTAAGTATTATTTGTTAAATAAAAGCAAAACTTTCAACAACGGATCTCTTGGTTCTG
>OTU_1091	AAGTCGTAACAAGGTTTCCGTAGGTGAACCTGCGGAAGGATCATTACCCTTCCGGTCTTCGAGACCGCGTCTTCAACTCGCCGCAGGACCCCACGAAAGTGGCCAGAAATGCGGACGAGGCGAAGTAACCCTTGACTATGAGTACCTTTTGTTCCCTCGGCGGGCTCGCGCCCGTCGCTGGGCCCATCCAAACCCCTTTGCAGTAGCAGTATACCTCTGATCGTGGGCACTTGAATCTTTACAACTTTCAACAACGGATCTCTTGGTTCTG
>OTU_1092	AAGTCGTAACAAGGTTTCCGTAGGTGAACCTGCGGAAGGATCATTACATTCAGTAGCCTAGCTACTGGCATGGGGATTGTTAGCCTGCATGGTATCACTACCGATGAGCAGCAGATCCCCTGTCTATACCCTTGTTTTTTGCGTACCTATTGTTTCCTCGGCGGGCTTGCTCGCCGGTTGGACAAAACCTATAACCTTTTTTTAATCTTCAATCAGCGTCTGAAATTATACATAATAATTACAACTTTCAACAACGGATCTCTTGGTTCTG
>OTU_1093	AAGTCGTAACAAGGTCTCCGTAGGTGAACCTGCGGAGGGATCATTACACAATATGAAAGCGGGCTGGACTCCCCCCAGCAGTGCGTTGCTTTGCGGCGTGCGCTGTTGGGGCCAGCCTTGCTGAATTATTCACCCGTGTCTTTTGCGTACTTCTTGTTTCCTTGGTGGGTTCGCCCACCACAAGGACAAACCATAAACCTTTTGTAATTGCAATCAGCGTCAGTAACAATAATAATAATTACAACTTTCAACAACGGATCTCTTGGTTCTG
>OTU_1094	AAGTCGTAACAAGGTTTCCGTAGGTGAACCTGCGGAAGGATCATTATGAATCAGTAGCTTGCTACTGCGCTGGGGGGAGATGGGAAAGTCCTGGCTGAAAAGTTAGTGTACCGGTACCTGCACCCCTATCATACCCTTGTCTTTTGAGCACTTATGTTTCCTTGGTGGGCTTGCCTGCCGATAGGACAACTTTTAAACCTTTTAATATATCAATCAGCGTCTGAAAAATAATTAATAATTACAACTTTCAACAACGGATCTCTTGGTTCTG
>OTU_1095	AAGTCGTAACAAGGTTTCCGTAGGTGAACCTGCGGAAGGATCATTAAAAAAGTACGTGCCAGCTAAGGTGGACAACGCCGGACGCTGGTGCTGTATTCAACCACTTGTATACCTGTACCTGTTGCTTCCGTGGAGTTACGGGTGCTCGCCCTGTTCGCAGGTGTGGGTTACCTTCCACGGGTGTATTTTGAACGCTTGTTTATTTGAATGCAGTGTCTGAATAGCTATTGTAATAAAGTTAAAACTTTCAACAACGGATCTCTAGGTTCTC
>OTU_1096	AAGTCGTAACAAGGTTTCCGTAGGTGAACCTGCGGAAGGATCATTAACGAGTTAGGGTCTTCTAGGCCCGACCTCCCAACCCATTGTTTACTACACCCTTTGTTGCTTCGGGGAGCCCGTCCTTCACGGACCGCCGGGGGTACCGCCTTAGGTCTCCTAGCCCGCGCTCTCCGGTAGCCCCAACCTTTAAAATTCTTAACTAAACGTGTTTTGACTAAGTACCAATTTTTAATTAAAAGCAAAACTTTCAACAACGGATCTCTTGGTTCTG
>OTU_1097	AAGTCGTAACAAGGTTTCCGTAGGTGAACCTGCGGAAGGATCATTAACGAGTTAGGGTCTCCTAGGCCCGATCTCCCAACCCTTTGTTTACCAAACCATTTTGTTGCTTCGGCGAGCCCGTCTTCACGGACCGCCGGGGGACCTGCTCAAGGACCCCTGGCCCGCGCTCGTCGGTGGCCCAAACCTTTAAATTCTTAACTAAACGTGTCATGTCTAAGTACCAATTTTTTAATTAAAAGCAAAACTTTCAACAACGGATCTCTTGGTTCTG
>OTU_1098	AAGTCGTAACAAGGTTTCCGTAGGTGAACCTGCGGAAGGATCATTAACGAGTTAGGGTCCCTCGCGGCCCGACCTCCCAACCCTTTGTCTACCTGACCACTGTTGCTTTGGCGAGCCCGTCTATAATGGACCGCCGGGGGGTACCTTGATCGGCCCTCTGGTCCGCGCTCGTCGATAGCCAAACTTTTAAAATCTTAACCAAACGTGTCTCAATCTAAGTATTATTTGTTAAATAAAAGCAAAACTTTCAACAACGGATCTCTTGGTTCTG
>OTU_1099	AAGTCGTAACAAGGTTTCCGTAGGTGAACCTGCGGAAGGATCATTAATTATGTTAAAGCGCCTTACCTTAGGGTTTCCTCTGGGGTAAGTGATTGCTTCTACACTGTGAAAATTTGGCTGAGAGACTCAGACTGGTCATGGGTAGACCTATCTGGGGTTTGATCGATGCCACTCCTGGTTTCAGGAGTACCCTTCATAATAAACCTAGAAATTCAGTATTATAAAGTTTAATAAAAAACAACTTTTAACAATGGATCTCTTGGTTCTCGCA
>OTU_11	AAGTCGTAACAAGGTCTCCGTTGGTGAACCAGCGGAGGGATCATTACCGAGTTTACAACTCCCAAACCCCTGTGAACATACCTATACGTTGCCTCGGCGGATCAGCCCGCGCCCCGTAAAAAGGGACGGCCCGCCCGAGGACCCCTAAACTCTGTTTTTAGTGGAACTTCTGAGTAAAACAAACAAATAAATCAAAACTTTCAACAACGGATCTCTTGGTTCTGGCATCGATGAAGAACGCAGCCATGCCTATTCAAGGTCTTGGTCATTTAGAGGAAGTAAAAGTCGTAACAAGGTTTCCGTAGGTGAACCTGCGGAAGGATCATTAGTGAATTGCTCTTTGAGCGTTAACTACATCCATCTACACCTGTGAACTGTTGATTGACTCCGGTCAATTAC…
>OTU_110	AAGTCGTAACAAGGTTTCCGTAGGTGAACCTGCGGAAGGATCATTAACAACGTATCCTAAACGTAAAAAACCCCCCCTGTGAACTTTCATAACCCGAGCTTGCTAGGCCCGTCAGCAATCCCTGGTAAATCATTGTTGACCAGCTCTTTGAGTCAGGGATATCCGAACTAGTCGTGTGGATTAAGTTCCGTGAAGCAAGAGCGGTGAGGCAAGTGACCCGGTACCCCCAAGCAATCAATGTTCTGTCAGTGTCGTTGATTGTGTAAGGGTGGCGCAGTAAACGATCGCTGGAGGCCACCACGGCCGGCGACTGGGTCAGCGAGCTCTGCTCCTTAATAACCCCACCTAAGGATTAGCTCGGCGAAAGCTTGAGCACCAAAAACTAATACGACTGTTAAC…
>OTU_1100	AAGTCGTAACAAGGTTTCCGTAGGTGAACCTGCGGAAGGATCATTATGAATTTGAACTTGTGTGGGCTTGGCTGTTCGATGCCTTGTGTGTTGAACGCCCCCTCGCAATTCTTTTTCTGTGAACTGTTCTCGGGCTTTTTTTAATTAAAAAGTCTGGGTTACTTTTTTGTTTTCTTGTATTATTCCACTTTATATTTCTAGTAATTCTTGCAAAAGAATGAAACAAATACAAAAACCAAGACAACTTTCAGCAATGGATCTCTTGGCTCTT
>OTU_1101	AAGTCGTAACAAGGTCTCCGTAGGTGAACCTGCGGAGGGATCATTCACATGATTACCTATTTTCAACAAACTGTGAACATTATTTACTTACTATTCGTGTGTATAAAATTTCCAATTTTTTTATATCACACTGTCATTCGATGAACATTAGATAGCTGGCTTGAATAATATATTGTTCTTTCTCAGCTGATTGTTTGTATTGACTAAACATCTTACAACAATCCCCATATAAACATAGAAACAACTCTATGCCCTGGATATCTTGGTTCTC
>OTU_1102	AAGTCGTAACAAGGTCTCCGTTGGTGAACCAGCGGAGGGATCATTAAAAGAGCGCCGAAAGGCTGCTTATAACCATCGCGAACCTATCCATCAGCGTTGCTTCGGCGGGAGCGCTCGCGGGACCGGATTCTGTCCGGGCCCCGGGCCGTGGACCCACGCCCTCCGGGGTGTGGGGCCGCCCGCCGGAGGTACGAAACTCTGCATCTTAGTGATATCTCTGAGTAAACAAGCAAATAAGTTAAAACTTTCAACAACGGATCTCTTGGTTCTG
>OTU_1103	AAGTCGTAACAAGGTCTCCGTAGGTGAACCTGCGGAGGGATCATTACCGAGTTAGGGTCTCACCGGCCCGAACCTCCCAACCCTTTGTCTACTTGACCATCGTTGCTTCGGCGAGCCCGTCCTCACGGACCGCCGGGGGGTCTTCGTACTCCTTGGCCCGTGCTCGTCGGTAGCCCCCACATTTAAAAAATCTTCTAACTAAACGTGTCTTGAATCTAAGTATTATTGTTAAATAAAAACAAAACTTTCAACAACGGATCTCTTGGTTCTG
>OTU_1105	AAGTCGTAACAAGGTTTCCGTAGGTGAACCTGCGGAAGGATCATTATCGAGTTCGGGGACTTATTGTCCACGCCCTCCAACCCTTTGTCTACCTGACCAGATGTTGCTTCGGCAGGCCCGTCGCCCCGCGAGGGGTGGCCGCCGGGGGTCCTTACCGGCCCCGGGTCCGCGCCTGTCGATGGCCCTCTTATAAACTCTTGCTTCAACCGTGTCGTCTGAGTAAAACAAACAAATAAAAACAAAACTTTCAACAACGGATCTCTTGGTTCTG
>OTU_1106	AAGTCGTAACAAGGTTTCCGTAGGTGAACCTGCGGAAGGATCATTCATAATTGAGTGTTTTATGGCACTCTTTAAAAAAATCCATATCCACCTTGTGTGCAACGTTTTTGGACTCTCTGGCGTTGATATCTCTCTGGTCCTCTAGGACTTTAGAGAAGGAAAACCAAGAGTTTGATTAACTTAACTCCATTAAAGCAAGTTTGTCTGAATATCTATTTCTGAATAACATAATTCAAAAATACAACTTTCAACAACGGATCTCTTGGCTCTC
>OTU_1108	AAGTCGTAACAAGGTTTCCGTAGGTGAACCTGCGGAAGGATCATTATGAATCAGTAGCTTGCTACTGCGCTGGGGGAGATGGGAAAGTCCTGGCTGAAAAGTCGGTGTACTGGTACCTGCACCCCTATCATATCCTTGTCTTTTGAGTACTTATGTTTCCTTGGTAGGCTTGCCTGCCAATAGGACAAACTTTTAAACCTTTTTAAATATCAATCAGCGTCTGAAAAATAATTAATAATTACAACTTTCAACAACGGATCTCTTGGTTCTG
>OTU_1109	AAGTCGTAACAAGGTTTCCGTAGGTGAACCTGCGGAAGGATCATTCACAATAAGAGTGTTTATGGCACTCTTCAAAAATCCATACCCACCTTGTGTGCAACGTaaaaagaaaaaaaaaGAAAGATGCGAGTCATGAGGGGAACCTCGAGTCTTGCTCCCTCTCTCTTTTTTCTTTTCCACATACACCTTTCTATTAGTTCCTATTGTCTGAAGCTGTTAGAGAATGACTAATTCTTAAACATAACTTTCAACAACGGATCTCTTGGCTCTC
>OTU_1110	AAGTCGTAACAAGGTCTCCGTTGGTGAACCAGCGGAGGGATCATTACAGAGAGTTATCTAACTCCCAAACCCATGTGAACTTACCACTGTTGCCTCGGCAGATGTTGCTGGGCGAACCTACCCTGTAGCGAGCTACTCTGTAGCGACCTACCCGGGAACGGCTTACCCTGTAGCGCCTGCCGGTGGACTACTAAACTCTTGTTATTTTTAAGTAATCTGAGCGTCTTATTTTAATAAGTCAAAACTTTCAACAACGGATCTCTTGGTTCTG
>OTU_1112	AAGTCGTAACAAGGTCTCCGTAGGTGAACCTGCGGAGGGATCATTCACATGATTTACTTTAATAAACATACTGTGAACTTTATATACTATTCGTGTGTATTAACTTGTTGTTATCAACTTGTTATTATCACACTGTCATTCGATGAACATTAGATAGCTGGCTCGTTTTTATTAACTTTCTCAGCTGATTTGTTTTTGTTAGACTAAACATCTATTCAATACAATCAACCAAACATAGAAACAACTCTATGCCCTGGATATCTTGGTTCTC
>OTU_1113	AAGTCGTAACAAGGTTTCCGTAGGTGAACCTGCGGAAGGATCATTACAAATCCATCCACGTCTCCCTCAAAAGAGACCACGTTGAAATGTTTCTCTTCCTGCCTGACCGAGATGCAGCCTTGTGCTGCCCCCTCGTGCCAGTGCATGGTCGAGCTCTCTCGTCCTCCTCTGGGGTTCGAGAGATATAAACTGCATCTTGTTGCCCAAATGTATATTCACTAGTTGATTTCAACTATAAGTACAACTTATAACAATGGATCTCTAGGCTCTT
>OTU_1116	AAGTCGTAACAAGGTTTCCGTAGGTGAACCTGCGGAAGGATCATTAATGAAACTTCAAAGTCGGCTTGTCATCTGTGCTGGTGGAGACACATGTGCACGTTGCAAGTCGCAAATCCCACACACCTGTGCACCTATGACTCTGAGTACCGCTTTGCATGGGCCCCTCAAAGGCCCTGGTACTCGAGTACTTTTACACACTCTGGATGTAATGGAATGTCTATTGTACAATGTACAACTAAAACAACTTTCAACAACGGATCTCTTGGCTCTC
>OTU_1117	AAGTCGTAACAAGGTTTCCGTAGGTGAACCTGCGGAAGGATCATTCATGTAACAATGAAAGGGTTGGCTGTCTTCGGATAGTTGGCCTGATCGTCCAACCTGTGAACATTATTAATTTTGGTGACCATGTAGTGTTGATGCTATAGTCTTTCGGGGCTTTAGTGTTGACCAGAAGCTGGCGCCAGGGGCTTTGCTAACCATTTTTATTTTATTGCCTAAAACATTTAAGTGAATTATATTATAACCTTTAACAATGGATCTCTTGGCTCCT
>OTU_1119	AAGTCGTAACAAGGTTTCCGTAGGTGAACCTGCGGAAGGATCATTAAACAACTAATAGTCTTTTTACAAAACTATATCAACCCTTTGTGAACCAAAAAACATTTTCGCTTCGGTAGCAGGCTTGGTTGCGTGCGGTTTGAAAAAACCAAGCGCTCTCAAGCTGTCAGCCTGCCGGCAGCACCAAACATAAACCTGTTTTAAAACTATTGTCTGAACAGAATCATTTTCGAATGAAAATTAAAACTTTCAACAACGGATCTCTTGGTTCTC
>OTU_112	AAGTCGTAACAAGGTTTCCGTAGGTGAACCTGCGGAAGGATCATTATCATAACGTATCCACGTATAAACCAAAACTTATAGTGTGAATTGTAATGTTATTTAACCTTTAGTTTTTAATCAATTGATTGCTATTCAGTCATATTTTATGAACCCGttttttttttGATTAAGGGTTCTTTTGACTATGATAGACTTGAAATTTCTCTTTCGGGAGGGTTTCTAGCTTTGATTAACTAAAGTGTAACAAAATTTAATCAAAAATCTTTATTAACCCATTGAACCGAATTAACTTAATTGTTATTCATTTTTCTTTATTGTGAACTGAATTGTTTCTTACTCTTTCGTAACTGAAAGCGAAGAAATTATATTTACGAAACATAAAAATGAACAACTCTTAGC…
>OTU_1120	AAGTCGTAACAAGGTTTCCGTAGGTGAACCTGCGGAAGGATCATTAAAAGTAATATGTATTCTCACGAATATGCATTATAAACCCATCTGTGTATCTTACCTGTTGCTTCCGCGAGCCAGTGATCTCGATCACCTCCGCGGGATGGCGAAGGCCATCCTCCCGGGGAGCACTCGCGGGAGGTATACATCAAACCCTTGCATTTCTATGTCATCTGTCTGAACTGTTTATAACAAATGTTAAAACTTTCAACAACGGATCTCTTGGTTCTC
>OTU_1121	AAGTCGTAACAAGGTCTCCGTAGGTGAACCTGCGGAGGGATCATTCACATGATTACCTTTTTCAACAAACTGTGAACTATTTTATTCTATTCGTGTGTGTTGATTGTTGATCTTCGGATCATTCTCAACATCACACTGTCATTCGATGAACATTAGATAGCTGGCTTGATTTTCGAATCTTTCTCAGCTGATTGTTTTGTGTTTTAATTACCACATCCAATCAACCAACAAACATAGAAACAACTCTATGCCCTGGATATCTTGGTTCTC
>OTU_1122	AAGTCGTAACAAGGTTTCCGTAGGTGAACCTGCGGAAGGATCATTATCGAGTTTTGAAATGGGTTGTTGCTGGTCTCTTATGAGGCATGTGCACACTCAGCTCATCCACTCTTAAACCCTATGTGCACCTATGTAGAGTTTGGTGAAAATCAGTCGAAAGGCTGATAAGATCCTTCTCTATGTCTTTTATACAAACGTTTTAGTTATAGAATGTTACCTTGCATTTAATGCATTATAGTATAACTTTCAGCAACGGATCTCTTGGCTCTC
>OTU_1123	AAGTCGTAACAAGGTTTCCGTAGGTGAACCTGCGGAAGGATCATTACCGAGTTAGGGTACTCTTCGTGCCCGACCTCCAACCCTTTGTCTACCTGACCAGATGTTGCTTCGGCAGGCCCGCCGCCCCGCAAAGGGCAGCCGCCGGGGGTCCTTACCGGCCCCGGGTCCGTACCTGTCGATGGCCCTTCTAAAACTCTTGCTTAAAACGTGTCGTCTGAGTAAACAAACAAAATAAAAACAAAACTTTCAACAACGGATCTCTTGGTTCTG
>OTU_1124	AAGTCGTAACAAGGTCTCCGTAGGTGAACCTGCGGAGGGATCATTACCGAGTTAGGGTCTCACCGGCCCGACCTCCCAACCCTTTGTCTACTTGACCATCGTTGCTTCGGCGAGCCCGTCCTCATGGACCGCCGGAGGGACCTTTACCGGCCCTCTGGCCCGCGCTCGTCGATGGCCCCCAACTTTAAAATCTCCAACTAAACATGTCTTGAATCTAAGTATTATTGTTAAATAAAAACAAAACTTTCAACAACGGATCTCTTGGTTCTG
>OTU_1125	AAGTCGTAACAAGGTTTCCGTAGGTGAACCTGCGGAAGGATCATTAAAGAGTTAGGGTCTTTCCAGGCCCGACCTCCCAACCCTTTGTTTACCTTGCTGCATGTTGCTTTGGCGGACCCGTCTCACGACCGCCCTGGGACCGCCGAGAGGTGCCCCTGGGCCCGTGTCCGCCGATAGCCAACCTAAACTCTTGAATGAATCGTGTTTTATGTCTGAGTCTATTGATTAAATCAAAAGCAAAAACTTTCAACAACGGATCTCTTGGTTCTG
>OTU_1126	AAGTCGTAACAAGGTTTCCGTAGGTGAACCTGCGGAAGGATCATTATGAATTTGATTGAGCGGCTCTTTTTTATGGGAGTAGCTTTTCATTTTCTGTGAACTGTTGGAGTTTTTTCTCCCAAGAGCGCAAGCTTTTGGGTAAACTTCATACTTGTATTCTTGATTTCTATTCCACACAATCCGTTTGGCTGAGACTCTCCCTTGCGGAGAGAATCAACTAAACGTATTATAAAACCAAGACAACTTTCAGCAATGGATCTCTTGGCTCTT
>OTU_1127	AAGTCGTAACAAGGTCTCCGTTGGTGAACCAGCGGAGGGATCATTACCGAGTTTGCTTTTCTAGCTCGAAACCCACTGTGAACATACCTCTTATTCGTTGCTTCGGCGGCGGTTCTCTCTAGACTTTCTCTCCTTTGGAGGGGGGTGTCTCCTGGGTCCAACCGTCGGAGGGACGCAAACCAAAACTCTTTTAACTTACTTCTCGAGTATTAATCTGAGTCGATATTTTTTAAATTATCAAAACTTTCAGCAACGGATCTCTTGGTTCTG
>OTU_1128	AAGTCGTAACAAGGTTTCCGTAGGTGAACCTGCGGAAGGATCATTACAGAGTTAGGGTCTTCTCGGCCCGACCTCCCAACCCTTTGCTTACTTAACTATTGTTGCTTCGGCGAGCCCGTCATTTTTGATGACCGCCGGAGGGCCATAATAAGCCCTCTGGCCCGTGCTCGTCGGTGGCCAACCATTTTTAAACGCTTAAATAAACGTGTCTTTATCTGAGTACTATATTTAATAAAAGCAAAACTTTCAACAACGGATCTCTTGGTTCTG
>OTU_1129	AAGTCGTAACAAGGTTTCCGTAGGTGAACCTGCGGAAGGATCATTATCGAATAAATTTAGAGTCGGTTGTTGCTGGTTCTTCTTGAACATTTGTGCACACCTTCTCTTATTTTTTCATCCACACACCCCCTGTGCACTTGTGAGACGGGAAGGGCTTAAAAACCCCCTGCCGTCTACTCTCCACATACAAACTCATTTTTAATTAAACTGAATGTAATTGATGTAACGCATCATTTAAACTAAGTTTCAACAACGGATCTCTTGGCTCTC
>OTU_113	AAGTCGTAACAAGGTAACCGTAGGTGAACCTGCGGTTGGATCATTAACAATTTGGACGCATGGGACAAGGGGTGTGATCCTGCGCAACAGATGCGCTTCGGCGCCATCTGCAGTTGCATCTCCCCTCGTCGCATCGCGCCCGGCTCACCAACCCCAAGTCAGTGAATTCTTCACTGGATTGGGGCGGAACGTGGGGGACCCATTTGTGAACTGTACTGTCTCTGGCGGTGGGGCACTTCAAAAGTGAACTTCACTCTCGAAGGTGTCTGTCAGTTGGCTGGGCTTCTTAAAAAGCCCTCCGGCCGTGGACAAGCCGCCAACCACTCTTGTGAGTAACGCTTAGCTACATTGTTTTGGCTAAAATCCACCTGTATATAAATGGGTTGGACAACTTTTGGC…
>OTU_1130	AAGTCGTAACAAGGTTTCCGTAGGTGAACCTGCGGAAGGATCATTAACAAATCGAACGTGCTGGGCGGCGCAAGCCAGCCCAGTCACATCAACCCGACCCTGCCTCCTCACGGAGCAGGCGAGGTGTGGGCTCGCTCCGGTTAAACGGACTGAGCCTGCGGTGAAGGCCGGCGCAAGCTGGGCGGATCCACATAGACGCTTTTTTAGTTTGACAGTTTTATGTGAAAACCATGAAAATGACAACTTTTAACAATGGATCTCTTGGCTCTT
>OTU_1131	AAGTCGTAACAAGGTTTCCGTAGGTGAACCTGCGGAAGGATCATTACCAATTCAACGGTGTGGTCGCGGCCTCCGGGGGCTTGCCCCCGGGCGGTAGAGGTAACACTCTCACGCGCCACATGTCTGAATCCTTTTTTTACGAGCACCCTTCGTTCTCCTTCGGTGGGGCAACCTGCCGTTGGAACTTACCAAAACCTTTTTTGCATCTAGCATTACCTGTTCAGATACAAACAATCGTTACAACTTTCAACAATGGATCTCTTGGCTCTG
>OTU_1132	AAGTCGTAACAAGGTTTCCGTAGGTGAACCTGCGGAAGGATCATTATCTGCTATTGTAAAAGGTGCCTTAGGGGCCCGTGCTCTGGGGAGTTGCGGGCCCTTCCGTGCAAACCCATCCGTGTACCTTTCCTGTTGCCTCCGTGGGTGCCCTCGGTGCCCGCGGGGGGTCATAGAGAAAACTATTTTTTTGCTTCCTCATGTCATCATGTCTGAAAGTGACCAGAAAACAAAAAAGATTCAAAACTTTCAACAACGGATCTCTTGGTTCTC
>OTU_1133	AAGTCGTAACAAGGTTTCCGTAGGTGAACCTGCGGAAGGATCATTAACGAGTTAGGGTCTCTCTGGCCCGACCTCCCAACCCTTTGTCTACTTGACCATCGTTGCTTCGGCGAGCCCGTCCTCACGGACCGCCGGAGGGATCTTTACTGGCCCTCTGGTCCGCGCTCGTCGGTAGCCCAACCTTTAAAATCTTTTTAACTAAACGTGCCTTAATCTAAGTACAATTATTAAATAAAAGCAAAACTTTCAACAACGGATCTCTTGGTTCTG
>OTU_1134	AAGTCGTAACAAGGTCTCCGTTGGTGAACCAGCGGAGGGATCATTAAAGAGTTATTTAACTCCCAAAATCATGTGAATTTACCTATGTTGCCTCGGCGGGGAAACCTACCCGGGGGCTGCTCTGAGTGGCCTACCCCGGTACCCTCCCGGTAGCTACGCTGTAGTTGTAGGCTTACCCGCCGGCGGACCATTCAAACTCTTATATTTCTGGCAATTCTGAATTATTATCATAATAAGTTAAAACTTTCAACAACGGATCTCTTGGTTCTG
>OTU_1136	AAGTCGTAACAAGGTCTCCGTTGGTGAACCAGCGGAGGGATCATTACCGAGTTAGGGTACTCTTCGTGCCCGACCTCCAACCCTTTGTCTACCTGACCAGATGTTGCTTCGGCAGGCCCGCCGCCCCGCGAGGGGCAGCCGCCGGGGGTCCTTACCGGCCCCGGGTCCGTGCCTGTCGATGGCCCTTCTAAAACTCTTGCTTAAACGTGTCGTCTGAGtaaaacaaacaaaataaaaacaaaacTTTCAACAACGGATCTCTTGGTTCTG
>OTU_1137	AAGTCGTAACAAGGTTTCCGTAGGTGAACCTGCGGAAGGATCATTACCGAGTCGAGGTGGCTGGCGCGCACCGCGTGCCGGCCACGTACCTCACCACCCGTGTTTACCGTACCCCGTTGCTTCGGCGGGCCCGCCGCCCAGCCGGCCGCCGGGGGACCTCGTGTCCCCGGGCCAGCGCCCGCCGAAGACCCCCCGAACACTGCCTGAAAGGTTGCTGTCTGAGCGGTTGTAAAACAAACAAAACTTTCAACAACGGATCTCTTGGTTCCG
>OTU_1138	AAGTCGTAACAAGGTTTCCGTAGGTGAACCTGCGGAAGGATCATTAAAGAGTTAGGGTCTTCTAGGCCCGACCTCCCAACCCTTTGTTTACTGAACCTCTGTTGCTTCGGGCGGGCCCGTCTCACGACCGCCGGAGGATCGCTGAAAGGCGTCCTCTGGTCAGCGTCTGCCGATAGCCAACCATTTCAAACTCTGAATAAATCATGTCCTTACGTCTAAGTCTATGATTAAATTAAAGCAAAACTTTCAACAACGGATCTCTTGGTTCTG
>OTU_1139	AAGTCGTAACAAGGTTTCCGTAGGTGAACCTGCGGAAGGATCATTATTGAATTTCTATCAAGGTGTTGCTGACTTTTCGGAGTATGTGCACCCTTGTTGAAACCATTTCTCCACCTGTGAACTTTTTGTAGACTTGGATTTAGTAGTGCGCAAGTGCGAAAGGCCCAAGTCTATGTTTTACACACTCTATGTATGGACTAGAATGAAATTTAATGGGCTTTAATGCCTATGAAATAAATACAACTTTCAGCAACGGATCTCTTGGCTCTC
>OTU_114	AAGTCGTAACAAGGTAACCGTAGGTGAACCTGCGGTTGGATCATTAAAAAAACAAATCTGAAAATACTTCATTCGGTAAAGGTTTTCAACCTCGAATGGGGGATTTCATACCCACATTCTGTGAACTTGTATACTGTCTCTGGCGGGGGAGAATGGATGTTGGGGGGTCCTCTTGGACTTTCCTCTGAACTTCTCGTCAGCCCGGATCGCCCCTCTGAGGTGAGCCGGTGCCGTGGACATCCCGCCAAACGCTTCCGATGGGAGATCTTTCCAAGGTCCCCCGTTCGGAAGGTTGTGCTCACCTTTTGCATCTGTTTTCTTTTTGGAATCCTTCTGAGAATCTGGTCGGGCGAATGCTCGGTCTTTTTGAAAAACAATTATTCAAAACAACTTTTGGCA…
>OTU_1140	AAGTCGTAACAAGGTTTCCGTAGGTGAACCTGCGGAAGGATCATTACCGAATGAGCTGTGCGTCACTGTGGTAGACACACTGTGCACCTTCTTGTAGTAGACCATTCAATAGTCTGCCATCAGAATTCGATGGGAATCTCGGATGCTGTGTTGTGGCGGGCTTTTTGGTCTCCTACGTCTTCTTTTTTTCACCACACAAAACCTGTCGTCGTATGGTGTTGCGCTTGAACACATATAACATAACTTTCAACAACGGATCTCTTGGCTCTC
>OTU_1142	AAGTCGTAACAAGGTTTCCGTAGGTGAACCTGCGGAAGGATCATTACCGAGTGTTTGGATGCCCCCTTCTTGGGGGTGTCCGTCCTCCCATCCGTGTCTATTGTACCCTGTTGCTTCGGCGGGCCCGCCCTCTTGTGGCCGCCGGGGGGCTTCCCTTGCCCCCGGGCCCGCGCCCGCCGGAGACACCACGAACTCTGTCTGATCTAGTGAAGTCTGAGTTGATTGTATCGCAATCAGTTAAAACTTTCAACAATGGATCTCTTGGTTCCG
>OTU_1143	AAGTCGTAACAAGGCTTCCGTAGGTAAACCTGCGGAAGGATCATCAATGAAACTTCAAAGTCGGCTCGTCTATCTGTGCTGGTGGAGACACATGTGCACGTTGGCGAGTCGCAAATCCACACACCTGTGAATCTATGACTCTGAGTACCGCTTTGCATGGCCTTCAGGGGCCTGGTACTCGAGTACTTTACACACTCTGAATGTAATGGAATGTCTTTTTGTACAATGTACAACTAAAAACAACTTTCAACAACGGATCTCTTGGCTCTC
>OTU_1144	AAGTCGTAACAAGGTTTCCGTAGGTGAACCTGCGGAAGGATCATTACATTCAGTAGCTTGCTACTGTTAgggggggggTCCATTAGTCTGTATAGTATCACTACTGATGAGCAGCACGACTCCCTGTCTATACCCTTGTCTTTTGCGCACTCATGTTTCCTCGGCGGCTTGATACCCGCCGGCTGGATCAATCTATACCCTTTTTAATTTTCAATCAGCGTCTGAAAAACCTAATAATTACAACTTTCAACAACGGATCTCTTGGTTCTG
>OTU_1145	AAGTCGTAACAAGGTTTCCGTAGGTGAACCTGCGGAAGGATCATTAAAGAGTTAGGGTCTTCTCGGCCCGACCTCCCAACCCTTTGTTTACTTAACTATTGTTGCTTCGGCGAGCCCGTCATTTTCTATGACCGCCGGAGGGCCGTAATAAGCTCTCTGGTCCGTGCTCGTCGGTGGCCAACCAATTTTAAACGCTTAATTAAACGTGTCTTTATCTGAGTACTATATTTAATAAAAGCAAAACTTTCAACAACGGATCTCTTGGTTCTG
>OTU_1146	AAGTCGTAACAAGGTTTCCGTAGGTGAACCTGCGGAAGGATCATTAAAGAAATCTGGCAAACGGTCCTTTACGGGGCTTAGTAGCCTTTTCTCTACAACCCACCCCTTTGTGAACCAACGCGCGAGTTAGTAAAGGGGGCGTGCTTCGGTGCACGCACCTTTGAAGGCTAGCGACTTTTTACCATATACACCTTTAGCAAGTCTCAGAATGTTACCTTTGCGTCTAACGCGATGAAATTACAACTTTCAGCAACGGATCTCTTGGCTCTC
>OTU_1147	AAGTCGTAACAAGGTCTCCGTAGGTGAACCTGCGGAGGGATCATTACCGAGTTCGTGCCCCGCCGCGGGGTAGATCTCCCACCCTTGTGTATCTTCGTGCCGTTCTGTTGCTTTGGCAGGCCGCCCAGGGCTGCGGCCCGGGCCACCGGCTCCCCCCGAGGGGGGGCGGGTGCGCGCCTGCCAGAGGACCCTCCAAACTCGTGTTTGTCAGTGTCGTCCGAGTACTATAACCAATCGTTAAAACTTTCAACAACGGATCTCTTGGTTCTG
>OTU_1148	AAGTCGTAACAAGGTCTCCGTTGGTGAACCAGCGGAGGGATCATTACCGAAGTTACCCTTCAAAAACCCTTTGTGAACGTTACCTCTTGCCGCGTTGCCTCGGCGGGAGGCGGCCGGGAgggggggggTCCGCCGCGTCCAGCGGAGGTCGCCCCCAGCCCGCCCGTCCCCGCCGGCAGCGCCACAAACTCTATTTGCACAGCGGACTGTATGTTCTGATTTACaaaaaaaaaCAAGTTAAAACTTTCAACAACGGATCTCTTGGTTCTG
>OTU_115	AAGTCGTAACAAGGTTTCCGTAGGTGAACCTGCGGAAGGATCATTAACAACGTATCCTAAACGTAAAAAACCCCCCCTGTGAACTTTCATAACCCGAGCTTGCTAGGCCCGCGAAATTCAGCAATCCCTGGTAAATCATTGTTGACCAGCTCTTTGAGTCAGGGATATCCGAACTAGTCGTGTGGATTAAGTTCCGTGAAGCAAGAGCGGTGAGGCAAGTGACCCGGTACCCCCAAGCAATCAATGTTCTGTCAGTGTCGTTGATTGTGTAAGGGTGGCGCAGTAAACGATCGCTGGAGGCCACCACGGCCGGCGACTGGGTCAGCGAGCTCTGCTCCCCCCACCTAAGGATTAGCTCGGCGAAAGCTTGAGCACCAAAAACTAATACGACTGTTAACA…
>OTU_1151	AAGTCGTAACAAGGTTTCCGTAGGTGAACCTGCGGAAGGATCATTACCGAGTGTTTGGATGCCCCTTCTCGGGGTGTCCGTCCTCCCATCCGTGTCTATTTGTACCCTGTTGCTTCGGCGGGCCCGCCCTTCGTGGCCGCCGGGGGGCTTCCCTGCCCCCGGGCCCGTGCCCGCCGGAGACCTCAACCATGAACACTGTCTGAAGGTTGCAGTCTGAGTACCGATATAAAAAATCGTTAAAACTTTCAACAACGGATCTCTTGGTTCCG
>OTU_1152	AAGTCGTAACAAGGTTTCCGTAGGTGAACCTGCGGAAGGATCATTAATGAGTTAGGGTCTCTCAGGCCCGACCTCCCAACCCTTTGTCTACTTGACCATCGTTGCTTCGGCGAGCCCGTCCTCACGGACCGCCGGAGGGACCTTTACCGGCCCTCTGGTCCGCGCTCGTCGGTAGCCCAACTATTAAAAATCTTTAACTAAACGTGCCTTAATCTAAGTACAATTATTAAATAAAAGCAAAACTTTCAACAACGGATCTCTTGGTTCTG
>OTU_1153	AAGTCGTAACAAGGTTTCCGTAGGTGAACCTGCGGAAGGATCATTAATTGCCGACCAATAGTTGTCGGTCTGGGGACATGGAAATTTTAACAGCTTGGGTCCGCCCACTTTTAAAAGAGTACATTCCTTTCTACCCTTGTTCTTTTGCGCACTTATGTTTCCTCGGCAGGCTAGCCTGCCGATTGGACAATTGAAAACCCTTTATTTCTCAATCAGCGTCTGAAAATAATAAATATTTACAACTTTCAACAACGGATCTCTTGGTTCTG
>OTU_1154	AAGTCGTAACAAGGTTTCCGTAGGTGAACCTGCGGAAGGATCATTATTGAATAAACCTGATGTGGTTGTAGCTGGCTCTTTCGGGAGTATGTGCACGCCCATCATCTTTATATCTCCACCTGTGCACCTTTTGTAGACACGAAGGATTGAGAAATCAATCGTTTGGGTTTACGTTTTATCATATACCCCATAGTATGTATTAGAATGAATCAATGGGCTTTGTGCCTATAAACATTATACAACTTTCAGCAACGGATCTCTTGGCTCTC
>OTU_1155	AAGTCGTAACAAGGTTTCCGTAGGTGAACCTGCGGAAGGATCATTAAAAAAATACGCATGGTGAAAATGTTGTAATGATATGGGATCCAATGCTGTATATAACCACCTGTTTACCTTTACCTGTTGCTTCCGTGGAATTACGGGTGCTCTTCCTGTTCGCAGGCTTGAGTTACCTTCCACGGGTGTATTTAAAAAATTGTTTTGTACTATTGTCTGATATAAAATTTTAATAAAAGTTAAAACTTTCAACAACGGATCTCTAGGTTCTC
>OTU_1156	AAGTCGTAACAAGGTTTCCGTAGGTGAACCTGCGGAAGGATCATTACCGAGTGTTTGGGCGCCCCCTCGCGGGGTGCCCGTCCTCCCATCCGTGTCTATTTGTACCCTGTTGCTTCGGCGGGCCCGCCCATCGTGGCCGCCGGGGGGCTTCACTGCCCCCGGGCCCGTGCCCGCCGGAGACCTCAACCATGAACACTGTCTGAAGGTTGCAGTCTGAGTGAATGATATAAAAATCGTTAAAACTTTCAACAACGGATCTCTTGGTTCCG
>OTU_1157	AAGTCGTAACAAGGTTTCCGTAGGTGAACCTGCGGAAGGATCATTACATTCAGTAGCCTAGCTACTGGCATGGGGATTGTTAGTCTGTATAGTATTACTACTGTTGAGCAGCAGATCCCCTGTCTATACCCTTGTTTTTTGCGCACCTATTGTTTCCTCGGCGGGCTTGCCCGCCGGCTGGACAAAAACTATAACCTTTTTAAATCTTCAATCAGCGTCTGAATCATACGTAATAATTACAACTTTCAACAACGGATCTCTTGGTTCTG
>OTU_1158	AAGTCGTAACAAGGTTTCCGTAGGTGAACCTGCGGAAGGATCATTATTGAATGAACTTGGAGTCGGTTGTCGCTGGCTGTCTTATTTGGCAGCATGTGCACGCCTTCTCTTTTCATCCACACACACCCCTGTGCACTTGTGAGACTGGAGACCGGTAAAAAAAGTCTTCAGTCTGCTAAATCCATATATAAACCCATTTAATTGAACTGAATGTAAATTGATGTAACGCATCTTTAAACTAAGTTTCAACAACGGATCTCTTGGCTCTC
>OTU_1159	AAGTCGTAACAAGGTTTCCGTAGGTGAACCTGCGGAAGGATCATTATTGAATATGAAAGGGGTTGTAGCTGGCCTTAACGGCACGTGCACGCCCCGTTCACATCCATTCAACCCCTGTGAACACTCTGTAGATCGGTCTCATGGGCCTTCTCCCTCTTTCGGGAGTCGGTCCTGGCCCCTCTATGTTTCATTTAAAACCCCAATCAGTTCAGAATGTAACGCGTCTAACGCACATAATACAACTTTCAGCAACGGATCTCTTGGCTCTC
>OTU_116	AAGTCGTAACAAGGTTTCCGTAGGTGAACCTGCGGAAGGATCATTAACAACGTATCCTAAACGTAAAAAACCCCCCCTGTGAACTTTCATAACCCGAGCTTGCTAGGCCCGCGAAATTCAGCAATCCCTGGTAAATCATTGTTGACCAGCTCTTTGAGTCAGGGATATCCGAACTAGTCGTGTGGATTAAGTTCCGTGAAGCAAGAGCGGTGAGGCAAGTGACCCGGTACCCCCAAGCAATCAATGTTCTGTCAGTGTCGTTGATTGTGTAAGGGTGGCGCAGTAAACGATCGCTGGAGGCCACCACGGCCGGCGACTGGGTCAGCGAGCTCTGCTCCTTAATAACCCCACCTAAGGATTAGAAAGCTTGAGCACCAAAAACTAATACGACTGTTAACA…
>OTU_1160	AAGTCGTAACAAGGTTTCCGTAGGTGAACCTGCGGAAGGATCATTACCGTGCCGTGGCAGCCGGCCCACAAAGCCTGGCTGTTTCACCTGGCCACCCGTGTCTACTTTACCTGTTGCTTCGGCGGGCCTGCGGGCCTGCTCGCTGCCGGGGGACCCTGCAGGGTTCCCAGGTTCGTGCCCGCCGAGGACCATGAAATTCTTGTTCAAGATTGGCGTCTGAGTGATTAAGAAATCAGTTAAAACTTTCAACAACGGATCTCTTGGTTCCC
>OTU_1161	AAGTCGTAACAAGGTTTCCGTAGGTGAACCTGCGGAAGGATCATTAACGAGTTAGGGTCTCTCTGGCCCGACCTCCCAACCCTTTGTCTACTTGACCATCGTTGCTTCGGCGAGCCCGTCCTCACGGACCGCCGGAGGGACCTTCACAGGCCCTCTGGTCCGCGCTCGTCGGTAGCCCAACCATTAAAATCTTTAACTAAACGTGCCTTAATCTAAGTATTATTTGTTAAATAAAAGCAAAACTTTCAACAACGGATCTCTTGGTTCTG
>OTU_1162	AAGTCGTAACAAGGTTTCCGTAGGTGAACCTGCGGAAGGATCATTAACGAGTTAGGGTCTTCTAGGCCCGACCTCCCAACCCATTGTTTACCACACCGTTTGTTGCTTCGGCGAGCCCGTCTTCACGGACCGCCGGGGGACCGTAGCAGGTCTCCTGGCCCGCGCTCGTCGGTAGCCTTAACCTTAAACTCTTTAACTAAACATGTCTTGACTAAGTACAAATTTTTTAATTAAAAGCAAAACTTTCAACAACGGATCTCTTGGTTCTG
>OTU_1163	AAGTCGTAACAAGGTCTCCGTAGGTGAACCTGCGGAGGGATCATTACCGAGTTAGGGTCTCACCGGCCCGATCTCCCAACCCTTTGTCTACTTGACCATCGTTGCTTCGGCGAGCCCGTCCTCACGGACCGCCGGGGGGTCTCCGTACCCCTTGGCCCGCTGCTCGTCGATAGCCCCCCAATTTAAAAAATCTTAACTAAACGTGTCTTGAATCTAAGTATTATTGTTAAATAAAAACAAAACTTTCAACAACGGATCTCTTGGTTCTG
>OTU_1164	AAGTCGTAACAAGGTCTCCGTAGGTGAACCTGCGGAGGGATCATTAACGAGTGAGGGTCGTCCAGGCCCGACCTCCCAACCCTTTGTTTACCGAACCTCTGTTGCTTCGGCGGACCCGCCTCACGGCCGCCGGAGGACCGTCGCAAGGCGTCCTCTGGCCCGCGTCCGCCGACGGCCCCACCACACAAACCCTGAACCAACCGTGTCGTGTGTCTCAGTTCATGATTAAATTATAAGCAAAACTTTCAACAACGGATCTCTTGGTTCTG
>OTU_1166	AAGTCGTAACAAGGTCTCCGTAGGTGAACCTGCGGAGGGATCATTAACGAGTTAGGGTCTCACCGGCCCGACCTCCCAACCCTTTGTCTACTTGACCATCGTTGCTTCGGCGAGCCCGTCCTCACGGACCGCCGGGGGGGTTCACTGAACCCCCTGGTCCGCGCTCGTCGACAGCCCCCAATTCCAAAATCTTAACTAAACGTGTCTTGAATCTAAGTACTATTGTTAAATAAAAAACAAAACTTTCAACAACGGATCTCTTGGTTCTG
>OTU_1168	AAGTCGTAACAAGGTAACCGTAGGTGAACCTGCGGTTGGATCATTAGAAAATTTGAAGCTCTGCTTCAGAAACACTGTGTGCACCGTTTTCTGTCTCTGGCAGGACCAGGGAGCAGCGATGCTCTCCCCTGCCAAAGGAGTGGGAGCTGCCTTCGGGCGGCTTCCATTCTGATTTGAACAACCCTATGTTTGTTTTAATTTGTCTGAATAATTCTTCACCTAGCGTGAGAAATTGAAAACAACTTTTGGCAACGGATCTCTTGGCTCTC
>OTU_1169	AAGTCGTAACAAGGTTTCCGTAGGTGAACCTGCGGAAGGATCATTATCGTAAAACCGAGGTGCAAGGGTTGTCGCTGACCTTTCTAAAGGTCGTGCACGCCCGAGCGCTCTCACCACAATCCATCTCACCCCTTTTGTGCATCACCGCGTGGGTCCTCCTTTGCGGGAGGGCTCGCGTTTTCACACAAAACTTGACGCAGTCTAGAATGTTTTATTTTTGCTGTAACATGCAATCAATACAACTTTCAACAACGGATCTCTTGGCTCTC
>OTU_117	AAGTCGTAACAAGGTTTCCGTAGGTGAACCTGCGGAAGGATCATTAACAACGTATCCTAAACGTAAAAAACCCCCCCTGTGAACTTTCATAACCCGAGCTTGCTAGGCCCGCGAAATTCAGCAATCCCTGGTAAATCATTGATGACCAGCTTTTGAGTCAGGGACCTCTGCCGATGAGAAGTTACAGTTGCAATTGAGCGCTTGCTTAAGTGACCTGGCATCCCCAAGCAATCCGTGTCTGAAAGTGTCACTGGTTGTGTAAGGATGGCGCAGTAACGATCGCTGGAGGCCCACACGGCCGGCGACCGGGTCACCGGGCTCACGCCCCTTAACCAACCCCAATGTGTCTGACCCGCTGGTTGGTAACGCTCCAGCACAAAAACCGAACAACTGTTAACA…
>OTU_1172	AAGTCGTAACAAGGTTTCCGTAGGTGAACCTGCGGAAGGATCATTAACAAATCATGATGTGGTGTTGTGTAACAGCACACCACAAATTAACCCGAACCTGTGCCTTTTGGCCAGGCTAGGTGTGGGTATTGTCATATTGGCTCGTTCAATATTATAATACTCGCGGTGAAGACGAAAGTCGGATCCACATAGACGCTTGTTTTTGTTTGACAGATTTCAATTGTATCCAAAATTAATGACAACTTTTAACAATGGATCTCTTGGCTCTT
>OTU_1174	AAGTCGTAACAAGGTTTCCGTAGGTGAACCTGCGGAAGGATCATTATTGAATAAACTTTTTAAGTTTTTTTCATATTCCCTGTTTATATTAAATACGTTCCTTCCATCGGACAGGTCTATTTTAGGACCCTCTAGCTTGAGCAAATGCTTTTGCTGGGGAGTTGCCGGTGGCGTTTCTAAAAAATAAACTTTTTGTTATATTATGAAATGTCTGAATATATATTTTTAAAATGAAATAAAACTTTCAACAACGGATCTCTAGGCTCTT
>OTU_1175	AAGTCGTAACAAGGTCTCCGTAGGTGAACCTGCGGAGGGATCATTACACAATAACATATGAAGGCTGTACGCGGCTGTGCTCTCGGGCGCAGTGCTGCTGAGGCTGGATTATTTATTTACCCTTGTCTTTTGCGCACTTGTTGTTTCCTGGGCGGGTTCGCCCGCCGCCAGGACCACACCATAAACCTTTTTTTATGCAGTTGCAATCAGCGTCAGTACAACAAATGTAAATCATTTACAACTTTCAACAACGGATCTCTTGGTTCTG
>OTU_1176	AAGTCGTAACAAGGTTTCCGTAGGTGAACCTGCGGAAGGATCATTACTGAATTAATGACGGGGTTGTAGCTGGCCTTTACCGGCATGTGCACGCCTTGTTCATCCAAATTCTTACACCTCTGTGCACCTTACATGGGATAATTGTGGTGGTCTGCTTTATTGCGGGCGACCTGATTGTTCTGTGATTTATTATACACGCTTCAGTTTAGAATGTCTCTTGCGTACAACGCATTAAATACAACTTTTAGCAACGGATCTCTTGGCTCTC
>OTU_1177	AAGTCGTAACAAGGTCTCCGTAGGTGAACCTGCGGAGGGATCATTAACGAGTTAGGGTCTCACCGGCCCGACCTCCCAACCCTTTGTCTACTTGACCATCGTTGCTTCGGCGAGCCCGTCCTCACGGCCCGCCGGAGGGCCTTGACCGGCCCTCTGGCCCGCGCTCGTCGATAGCCCCCAACTTTAAAATCTTAACTAAACGTGTTTTGAATCTAAGTATTATTGTTAAATAAAAACAAAACTTTCAACAACGGATCTCTTGGTTCTG
>OTU_1178	AAGTCGTAACAAGGTTTCCGTAGGTGAACCTGCGGAAGGATCATTAACGTATCTGCGACGGGGTTCGGCGTGCCCTGCTCCGGTCCATACGGGCCGTGCAGCGGGCTGCCGTCCCCGTTCACACCTCACAAACCCACTGTGAACCTTCACGGCGGAAGGGAGGAGACTCCCCGAGGCCGCATACCAAACTCCAGTCGTAAAGAATGTCGTGCGGACTTGCGCCGCCTAAAACACAAAACAACTTTCAACAACGGATCTCTTGGCTCTC
>OTU_1179	AAGTCGTAACAAGGTTTCCGTAGGTGAACCTGCGGAAGGATCATTAACGAGTTAGGGTCTCTCGCGGCCCGACCTCCCAACCCTTTGTCTACCCAACCGTGTGTTGCTTCGGCGGGCCCGTCGTTATTCGACCCCCGGGGACTTGAAACCTCCTCGGTCCGCGCCCGCCGGCGGCCCTATCTCAAAATTCTATGAATCAATCGTGCCCATGTCTAAGTCTTAAAACAAATCAAAAACAAAACTTTCAACAACGGATCTCTTGGTTCTG
>OTU_118	AAGTCGTAACAAGGTTTCCGTAGGTGAACCTGCGGAAGGATCATTAACAACGTATCCTAAACGTAAAAAACCCCCCCTGTGAACTTTCATAACCGCTAGGCCCGCGAAATTCAGCAATCCCTGGTAAATCATTGTTGACCAGCTCTTTGAGTCAGGGATATCCGAACTAGTCGTGTGGATTAAGTTCCGTGAAGCAAGAGCGGTGAGGCAAGTGACCCGGTACCCCCAAGCAATCAATGTTCTGTCAGTGTCGTTGATTGTGTAAGGGTGGCGCAGTAAACGATCGCTGGAGGCCACCACGGCCGGCGACTGGGTCAGCGAGCTCTGCTCCTTAATAACCCCACCTAAGGATTAGCTCGGCGAAAGCTTGAGCACCAAAAACTAATACGACTGTTAACA…
>OTU_1180	AAGTCGTAACAAGGTCTCCGTAGGTGAACCTGCGGAGGGATCATTAACGAGTTAGGGTCTCACCGGCCCGACCTCCCAACCCTTTGTCTACTTGACCATCGTTGCTTCGGCGAGCCCGTCCTCACGGACCGCCGGGGGGACCCTCACCGGCCCTCTGGCCCGCGCTCGTCGACGGCCCCAATTTTAAAATCTTAACTAAACGTGTCTTGAATCTAAGTACTATTGTTAAATAAAAACAAAACTTTCAACAACGGATCTCTTGGTTCTG
>OTU_1181	AAGTCGTAACAAGGTTTCCGTAGGTGAACCTGCGGAAGGATCATTACTTTCAGTAGCTTGCTACTGTGTAAGAGGGTCTATTAGCCTGTATAGTATTACTACTGATGAGCAGCATGACCCTCTGTCTATACCCTTGTCTTTTGCGCACTCATGTTTCCTCGGCGGCTTACCCCCGCCGGTTGGACAACTTAATAACCTTTTTAATTTTTAATCAGCGTCTGAAAAACCTAATTATTTACAACTTTCAACAACGGATCTCTTGGTTCTG
>OTU_1182	AAGTCGTAACAAGGTCTTCGTAGGTGAACCTGCGGAGGGATCATTACCGAGTTAGGGTCCTCATCGGGCCCGACCTCCCAACCCATTGTTTATGATACCTAGTGTTGCTTCGGTAGGCCTGGTCTCTACCTGCTGGGGGGCCGTCACACGCCCGCCGGAGAGTGCCTGCCGACAGCCTAAACCTCAAAATCTTTAACCAAACGTGTCTTTGTCTGAGTAAACGTCTTTAATAAAAGCAAAACTTTCAACAACGGATCTCTTGGTTCTG
>OTU_1183	AAGTCGTAACAAGGTTTCCGTAGGTGAACCTGCGGAAGGATCATTACCGAGTGCAGGTCTGCCCCCGGGCAGGCCTAACCTCCCATCCGTGTCTATTGTACCCTGTTGCTTCGGCGGGCCCGCCGCTTGTCGGCCGCCGGGGGGGCGCCTCTGCCCCCCGGGCCCGTGCCCGCCGGAGACCCCAACACGAACACTGTCTGAAAGCGTGCAGTCTGAGTTGATTGAATGCAATCAGTTAAAACTTTCAACAATGGATCTCTTGGTTCCG
>OTU_1184	AAGTCGTAACAAGGTTTCCGTAGGTGAACCTGCGGAAGGATCATTAACCAGCCGTGAAGGTCGCCCTGAAAAGGGAATGACCTCTCACCCGGCCACCCTTGCTTACTTTAACCTGTTGCTTTGGTGGGCCCGCCGTGAGGCCGTCGGGGAACTTGGGTTCCTGGGCCCGTGTCCATCAAAGTTCTAACTGAACTCTGCAAGTTTCTATGTTGTCTGAGCGTTAAAGCATAACCTTTTAAAACTTTCAACAACGGATCTCTTGGTTCCG
>OTU_1185	AAGTCGTAACAAGGTTTCCGTAGGTGAACCTGCGGAAGGATCATTATTGAATGAATGTAGAGTTGGTTGTCGCTGGCCTCTTTGCGGAGGCATGTGCACGCCTTCTCTTTCATCCACACACACCTGTGCACTTGTGAGACGGAGGCCTTTTTCTTTCACGAGAGGGGGGCTTCCGTCTGCCAATACATATACTCATATACTTTAAACTGAATGTAACTGATGTAACGCATCTATAAACTAAGTTTCAACAACGGATCTCTTGGCTCTC
>OTU_1186	AAGTCGTAACAAGGTCTCCGTTGGTGAACCAGCGGAGGGATCATTACAGAGTTGCAAAACTCCCTAAACCATCGTGGACGCTACCTTCAAACGTTGCTTcggcgggcggcccgctcccctagcgcccccgtggcgcccggggcgcaggccccccggcccccccGCGGGGCGCCCGCCGGAGGTACCCAACTCTTGTTAATTTTTAGGCCTCTCTGAGTCTTCTGTACTGAATAAGTCAAAACTTTCAACAACGGATCTCTTGGTTCTG
>OTU_1187	AAGTCGTAACAAGGTTTCCGTAGGTGAACCTGCGGAAGGATCATTATCGAATGAATTTAGAGTTGGTTGTCGCTGGCCCCCCCAAGCAAAGGGGGGCATGTGCACGCCTTCTCTTTTCATCCACACACACCTGTGCACTTGTGAGACGGAGGATTGaaaaaaaaGTCCTCCGTCTACTAATTACACAAACTCAATTGTACTTGAACTGAATGTAATTGATGTAACACATCATTAGAACAAAGTTTCAACAACGGATCTCTTGGCTCTC
>OTU_119	AAGTCGTAACAAGGTTTCCGTAGGTGAACCTGCGGAAGGATCATTAACAACGTATTTTAAACGTAAAAAACTCCCCCTGTGAACCTTCATAACCCGAGCTTGCTAGGCCCGCGAAATTCAGCAATCCCTGGTAAATCATTGTTGACCAGCTCTTTGAGTCAGGGATCTCCGAACTAGTCGTGTGGATTAAGTTCCGTGAAGCAAGAGCGGTGAGGCAAGTGACCCGGTACCCCCAAGCAATCAATGTTCTGTCAGTGTTGTGTAAGGGTGGCGCAGTAAACGATCGCTGGAGGCCACCACGGCCGGCGACTGGGTCAGCGAGCTCTGCTCCTTAATAACCCCACCTAAGGATTAGCTCGGCGAAAGCTTGAGCACCAAAAACTAATACGACTGTTAACA…
>OTU_1190	AAGTCGTAACAAGGTCTCCGTTGGTGAACCAGCGGAGGGATCATTACCGAAGTTACTCTTCACAACCCTTCTGCGAACCCTACCGACCTTTGCCGCGCGTTGCCTCGGCGGGGAGGTCCGGGGTCGGGGGGTGGCTCCCCGCGGGcccccccccTAACTCGGGCCCCCGCCGGCCGTGCCGAACTCTTCTATTTGCGAAAGCGAACTGCATGTCTGATTGCGTCTTGAAAACAAGTCAAAACTTTCAACAACGGATCTCTTGGTTCTG
>OTU_1191	AAGTCGTAACAAGGTTTCCGTAGGTGAACCTGCGGAAGGATCATTAAACAACTAATAGTCTTTTTACAAAACTATATCAACCCTTTGTGAACCAAAAATCCTTTTCGCTTCGGTAGCAGGCTTGGGTGCGTGCGGTTTGAAAAAATCCAACACTCAAGCTGTGAGCCTGCCGGCAGCACCAAACATAAACCTGTTTTAAAACTATTGTCTGAACAGAATCATTTTCGAATGAAAATTAAAACTTTCAACAACGGATCTCTTGGTTCTC
>OTU_1192	AAGTCGTAACAAGGTCTCCGTAGGTGAACCTGCGGAGGGATCATATTAAGGAGAGTTATTAGGAGGAAGAGAGGAATATGACAAGATGTTGTATGACTCTTGACTCTTGACTTGGAAGAGCACGAGATAGTAGAGTTTAAGGGGTGCCATGGTATTACTTGTATGATTGTGGCAGCCCTTTTTAACCCAAAATTTAAACTGTTATCAAAATCTAGTTTAGTATATAACATTACAAAAACAACTTTTAACAACGGATCTCTAGGCTCTT
>OTU_1193	AAGTCGTAACAAGGTCTCCGTAGGTGAACCTGCGGAGGGATCATTAACGAGTGAGGGTCGTCCAGGCCCGACCTCCCAACCCTTTGTTTACCGAACCTCTGTTGCTTCGGCGGACCCGCCTCACGGCCGCCGGAGGACCGTCGCGAGACGTCCTCTGGCCCGCGTCCGCCGACGGCCAACCTCTCAAAACCCTGAACCAACCGTGTCGTGTGTCTCAGTTTATGATTAAATTAAAGCAAAACTTTCAACAACGGATCTCTTGGTTCTG
>OTU_1194	AAGTCGTAACAAGGTTTCCGTAGGTGAACCTGCGGAAGGATCATTACCGAGTTAGGGTGCTCTTCGTGCCCGACCTCCAACCCTTTGTCTACCTGACCAGATGTTGCTTCGGCAGGCCCGCCGCCCCGCGAGGGGCAGCCGCCGGGGGTCCTTACCGGCCCCGGGTCCGTGCCTGTCGATGGCCCTTCTAAAACTCTTGCTTAAACGTGTCGTCTGAGTAAAACAAACAAATAAATCAAAACTTTCAACAACGGATCTCTTGGTTCTG
>OTU_1195	AAGTCGTAACAAGGTTTCCGTAGGTGAACCTGCGGAAGGATCATTACCGAGTTAGGGTCTTCTAGGCCCGATCTCCCAACCCTTTGTTTACCAAACCATCGTTGCTTCGGCGAGCCCGTCCTCTATGGACCGCCGGGGGGCTGTCACAGGCTCTCTGGTCCGCGCTCGTCGGTGGCCAACCTTACAAATTCTTTAATAAACGTGTCTTGATCTGAGTACCATATTTTAATCAAAATTAAAACTTTCAACAACGGATCTCTTGGTTCTG
>OTU_1196	AAAGTCGTAACAAGGTTTCCGTAGGTGAACCTGCGGAAGGATCATTACATTCAGTAGCTTGCTACTGTTAGGGGGGTCGATCAGCCTGTATAGTATCACTACTGATGAGCAGCACAACCCCCTGTCTGTACCCTTGTCTTTTGCGCACTCATGTTTCCTCGGCGGGTCTATGCCCGCCGGCTGGACAACTCTATAACCTTTTTAATTTTCAATCAGCGTCTGAAAAACCTAATAATTACAACTTTCAACAACGGATCTCTTGGTTCTG
>OTU_1197	AAGTCGTAACAAGGTAACCGTAGGTGAACCTGCGGTTGGATCATTACAGAAAATGTTTTTCACAAAACATACACATTGCGCACTGTATTTGTCTCTGGCGGCGGGACAGCTATGGATTACAACTGTAGTTGTCTGTCAGTCATAGTGTAAAAGCTATGACCGTGGACAAACCGCCAAAATCATAACAACTTGTAATTTTGTGATTCTGTAACAAATGTAGTCTTATTATAACATAATAAAACTTTCAACAACGGATCTCTTGGCTCTC
>OTU_1199	AAGTCGTAACAAGGTTTCCGTAGGTGAACCTGCGGAAGGATCATTAATTGCCGACCACTATTTGTCGGTTTGAGGGCATGGAAATTTTAAAAGCCTGGGTACGCCTACTTTTAAAAGAGTACATTCCTTTCTACCCTTGTTCTTTTGCGCACTCATGTTTCCTCGGCAGGTTAGCCTGCCGATTGGACAATTAAAACCCTTCATTTCTCAATCAGCGTCTGAAAATAATAAATATTTACAACTTTCAACAACGGATCTCTTGGTTCTG
>OTU_12	AAGTCGTAACAAGGTTTCCGTAGGTGAACCTGCGGAAGGATCATTAACACGTATCCACGTTTTATCAACCAATTGAGCACCTGTTTTCACACTCTCACCTTTGGGCAGAGAATGAGTTGGTTTTCGTTGTGTAGAGATGTTGTTTGGGATGCTTCGGTGTCGACCTCTACCAATTACATGCGGGCTCGTTTCTGCAGACAACTGTATCTCTTGCTTTTTCATTTTACAAAGGTCAACCTATTGCGTCTTGTGTATCGATCCTTCAGCCTTGGTCCCCAAACAAGACCGCGGGCTGTTGGATTGTGACAAGACCACCTACAAATTAACCAATTTCACCACACCCCTTTTTGCTAGTTGACTTTTTATATGTTGTTCTCTTTTCTCTCTTTCATTAGCGAG…
>OTU_120	AAGTCGTAACAAGGTTTCCGTAGGTGAACCTGCGGAAGGATCATTAACACGTATCCAACGTTAAACCCCCCCGTGAATATTAAGCGTGCTCTTACATCCTTGCACAACAGCAATCTCTGGTAAATCATGTCGAACGGTTTGATTCAGAGACCTCTGGCTTGTGCGATGACGGCGGAAGCTAAAGGTGTAATCGAGCGCTAGGTTCAGTGGTTTGGTCTTCCCCTCAAACCACTTCAATGAATGTCAGTGTCATTGAAGTGTGATGGGGAAGTCGCTTAACGACGCTGTAGGCTCACACGAGCCGGCGTCCAAATCACCAGGCGCAAGCCTCCCTAAAACCACATGTCAGCGTAGGCCCTTCTGTCGTGGTTGGGCGTAAAAACGAACAACTGTTAACAA…
>OTU_1200	AAGTCGTAACAAGGTTTCCGTAGGTGAACCTGCGGAAGGATCATTAACGAGTTAGGGTCTTCTAGGCCCGACCTCCCAACCCTATGTTTATTAAACCTCTGTTGCTTCGGCGGACCCGTCTCACGACCGCCGGAGGATCGCCGCGAGGCGTCCTCTGGCCAGCGTCCGCCGATGGCCAACCACTTAAACTCTGAATAAATCGTGTCATTATGTCTAAGTCTATGATTAAATTAAAGCAAAACTTTCAACAACGGATCTCTTGGTTCTG
>OTU_1201	AAGTCGTAACAAGGTTTCCGTAGGTGAACCTGCGGAAGGATCATTAACGAGTAACTGAACAGGTTGTAGCTGGTCTCGTAAGAGGCATGTGCACGCCTGGCTCATCCACTCTTCAACCTCTGTGCACTTATTGTAGGTCGGTAGAAAGGCAAGACTTGTTTTTGTCTGGAAGCCTTCCTATGTATTTTACAAACGCTTCAGTTTAAGAATGTATCTCTGCGTATAACGCATCTATATACAACTTTCAGCAACGGATCTCTTGGCTCTC
>OTU_1202	AAGTCGTAACAAGGTTTCCGTAGGTGAACCTGCGGAAGGATCATTAACGTGTTCGTTCGGCCGTTCGGGTCGGCCCTGCACCGACGGAGACGTCGTGCTGCGGGCTCCCGGACGCGCCTTCCAAACCAAACCCCTGTGAACCTTTGGGAGGGTCGAGCCTTCGCCGGCGACGCCGTCCCCTTTACAAACTCTTGTATCTCATAGAATGACCGCGGACATCGTCTGCCTAAACACATAACAACTTTCAACAACGGATCTCTTGGCTCTC
>OTU_1203	AAGTCGTAACAAGGTTTCCGTAGGTGAACCTGCGGAAGGATCATTAATGAAACTTCAAAGTCGGCTCGTCTATCTGTGCTGGTGGAGACACATGTGCACGTTGGCGAGTCGCAAATCCACACACCTGTGCATCTATGACTCTGAGTACCGCTTTGCATGGCCCTCTGGGGCCTGGTACTCGAGTACTTTACACACTCTGAATGTAATGGAATGTCACTGTACAATGTACAACTATAAACAACTTTCAACAACGGATCTCTTGGCTCTC
>OTU_1204	AAAGTCGTAACAAGGTTTCCGTAGGTGAACCTGCGGAAGGATCATTAAATTCAGTAGCTTGCTACTGTTAGGGGGGTCTATTAGTCTGTATAGTATCACTACTGATGAGCAGCACGACCCTCTGTCTATACCCTTGTCTTTTGCGCACTCATGTTTCCTCGGCGGCTTAATACCCGCCGGCTGGATCAATCTATAACCTTTTTAATTTTCAATCAGCGTCTGAAAAACCTAATAATTACAACTTTCAACAACGGATCTCTTGGTTCTG
>OTU_1205	AAGTCGTAACAAGGTCTCCGTTGGTGAACCAGCGGAGGGATCATTACAGAGTTACAATACTCCCCACACCATTGTGAACCTTACCCTTCTACCGTTGCTTCGGCGGGCGGCGGCCCGGGCCCACCTGCGGGCTGCGCGTCGCCCCCTGGCCCCCCGCTGCGGGGGGCGCCCGCCGGAGGAAACCCCAAACCATATGACAGCAATACGGCCTCTCTGAGTCTCTGTACCGAATAAGTCAAAACTTTCAACAACGGATCTCTTGGTTCTG
>OTU_1206	AAGTCGTAACAAGGTCTCCGTTGGTGAACCAGCGGAGGGATCATTATCGAAGTTACTCTTCATACCCATTTGTGAACACTACCCCATTGCCGCGCGTTGCCTCGGCGGTGAGGTCCGCGGGGGGGTGGGCAGCGCTACGGcgccgcccgcccctccccgggccccccccgccggccgcgccTTACTCTTAATTTGCAAAGCGGACTGTACGATCTGATTAATCTTGATAAACAAGTCAAAACTTTCAACAACGGATCTCTTGGTTCTG
>OTU_1207	AAAGTCGTAACAAGGTTTCCGTAGGTGAACCTGCGGAAGGATCATTAAAAAATATAGAATTAATTTTCTATAAACCCAATCTGTGTATTCGTACCTGTTGCTTCCGTGGGACAGTGAACGCTTGTCGTTCCCTCTGGCGCTGTTCTTCGGAACGGATGCTGGGGAGTGCCCACGGGAGGTCTACATAAACTCTGTTTTTTCTGAACTCAGTCTGAAAACTGTTTTTAAATAAACTTTAAAACTTTCAACAACGGATCTCTTGGTTCTC
>OTU_1208	AAGTCGTAACAAGGTTTCCGTAGGTGAACCTGCGGAAGGATCATTAACGAGTTAGGGTCTCTCTGGCCCGACCTCCCAACCCTTTGTCTACTTGACCATCGTTGCTTCGGCGAGCCCGTCCTCACGGACCGCCGGAGGGACCTTCACAGGCCCTCTGGTCCGCGCTCGTCGGTAGCCCAACTTTTATAAATTCTTAACTAAACGTGTCATTATCTAAGTACTATTGTTAATTAAAGCAAAACTTTCAACAACGGATCTCTTGGTTCTG
>OTU_121	AAGTCGTAACAAGGTTTCCGTAGGTGAACCTGCGGAAGGATCATTAACAACGTATCCTAAACGTAAAAAACCCCCCCTGTGAACTTTCATAACCCGAGCTTGCTAGGCCCGCGAAATTCAGCAATCCCTGGTAAATCATTGTTGACCAGCTCAGGGATATCCGAACTAGTCGTGTGGATTAAGTTCCGTGAAGCAAGAGCGGTGAGGCAAGTGACCCGGTACCCCCAAGCAATCAATGTTCTGTCAGTGTCGTTGATTGTGTAAGGGTGGCGCAGTAAACGATCGCTGGAGGCCACCACGGCCGGCGACTGGGTCAGCGAGCTCTGCTCCTCAATAACCCCACCTAAGGATTAGCTCGGCGAAAGCTTGAGCACCAAAAACTAATACGACTGTTAACAA…
>OTU_1210	AAGTCGTAACAAGGTTTCCGTAGGTGAACCTGCGGAAGGATCATTAACGAGTTAGGGTCTCTCTGGCCCGACCTCCCAACCCTTTGTCTACCTTACCACGTTGCTTCGGCGGGCCTGTCGACAGGATCTGTCGGCTGCCGGCGGGCCTCAAAACCCCGCTGGACAGTGCCCGTCGATGGCCAACCTCTTAAAACTCTTGAAGAACCATGTCGTCTGAGTACCAAACTAAATAAAGTAAAAACTTTCAACAACGGATCTCTTGGTTCTG
>OTU_1211	AAGTCGTAACAAGGTCTCCGTTGGTGAACCAGCGGAGGGATCATTACCGAAGTTACTCTTCAAAACCCATTGTGAACCTTACCTCTTGCCGCGCGTTGCCTCGGCGGGGAGGCGGGGCTCGGGTTCGGCGCGCCCCTCACCGGGCCGCCGTCCCCGTTCCCCGTCCCCGCCGGCCGCGCCAAACTCTAAATTTGAAAAAGCGTACTGCACGTTCTGATTCAAAACAAAAACAAGTCAAAACTTTTAACAACGGATCTCTTGGTTCTG
>OTU_1212	AAGTCGTAACAAGGTTTCCGTAGGTGAACCTGCGGAAGGATCATTACCGAGTTAGGGTCGCTCCCACGCGCCCGACCTCCAACCCTTTGCTTACTTGACCTTTTGTTGCTTCGGCAGGCCCGTCTTCGTGGCCGCCGGGGGTCCCTCCCGACTCCTGGTCAGCGCCTGCCGACAGCCCCCTTCAAAAATCTTTGCTTAAACGTGTCGTCTAAGTATTGTTAAAAACAAAATAAACAAAAACTTTCAACAACGGATCTCTTGGTTCTG
>OTU_1213	AAGTCGTAACAAGGTAACCGTAGGTGAACCTGCGGTTGGATCATTAAAAAATCCTTCTGTGAAAAACCCGGCTCGTTTGAAAAGCGCGGATGGCGGCCGGTTCTCCGGCCCCTTGTTGTGCCACTCACGAGCCCTGTTTTTACACGAACCCTGTGTGAACCGTAATATTTATTCCATCCACGTAATACGAAATTTCTAGTCTAAAGTCTTCTTCATATCACAAGAATATGATAAAAACAACTTTTGGCAACGGATCTCTTGGCTCTC
>OTU_1214	AAGTCGTAACAAGGTCTCCGTAGGTGAACCTGCGGAGGGATCATTACCGAGTTCGTGCCCCGCAGCGGGGTAGATCTCCCACCCTTGTGTATCTTCGTACCGTTCTGTTGCTTTGGCAGGCCGCTCAGGCTGCGGCTCGACCACCGGCTCCCCCTAGGGGGGCGGGTGTGCGCCTGCCAGAGGAccccccccAACTCTTGTTTGTCAGTGTCGTCTGAGTACTACAACCAATCGTTAAAACTTTCAACAACGGATCTCTTGGTTCTG
>OTU_1215	AAGTCGTAACAAGGTTTCCGTAGGTGAACCTGCGGAAGGATCATTAATAAACCTAGTCGTTCGCGTACACAGGGGCAACCCTCGCGCGATGTCAGCAATACCTAGGTCACCCTTGAATAAACTACCCTTGTTGCTTTGGCGGGCCGCCCCTCGGGGCCAGCGGCTTCGGCTGCTGCGCGCCCGCCAGAGGACCACAACTCTTGTTTTTAGTGATGTCTGAGTACTATATAATAGTTAAAACTTTCAACAACGGATCTCTTGGTTCTG
>OTU_1218	AAGTCGTAACAAGGTCTCCGTAGGTGAACCTGCGGAGGGATCATTCACATGATTACCTTTTCAACAAACTGTGAACTTTATTTAATCTATTCGTGTGTGTTGTTTGATCTTCGGATCATTCTCAATATCACACTGTCATTCGATGAACATTAGATAGCTGGCTTGATTTTCGAATCTTTCTCAGCTGATTGTTTTTGAATTTAATTACTCGATACAATCAACCAACAAACATAGAAACAACTCTATGCCCTGGATATCTTGGTTCTC
>OTU_1219	AAGTCGTAACAAGGTTTCCGTAGGTGAACCTGCGGAAGGATCATTAACGAGTTAGGGTCTTCCAGGCCCGACCTCCCAACCCTATGTTTATTGAACCACTGTTGCTTCGGTGGGCCCGTCTCACGGCCGCCGGAGGACCGCTGAAAGGCGTCCTCTGGCCCGCGTCCGCCGATGGCCAACCACTTAAACTCTGAATGAATCGTGTCATATGTCTAAGTCCATGATTAAATTAAAGCAAAACTTTCAACAACGGATCTCTTGGTTCTG
>OTU_122	AAGTCGTAACAAGGTTTGAACCTGCGGAAGGATCATTAACAACGTATCCTAAACGTAAAAAACCCCCCCTGTGAACTTTCATAACCCGAGCTTGCTAGGCCCGCGAAATTCAGCAATCCCTGGTAAATCATTGTTGACCAGCTCTTTGAGTCAGGGATATCCGAACTAGTCGTGTGGATTAAGTTCCGTGAAGCAAGAGCGGTGAGGCAAGTGACCCGGTACCCCCAAGCAATCAATGTTCTGTCAGTGTCGTTGATTGTGTAAGGGTGGCGCAGTAAACGATCGCTGGAGGCCACCACGGCCGGCGACTGGGTCAGCGAGCTCTGCTCCTTAATAACCCCACCTAAGGATTAGCTCGGCGAAAGCTTGAGCACCAAAAACTAATACGACTGTTAACAA…
>OTU_1220	AAGTCGTAACAAGGTTTCCGTAGGTGAACCTGCGGAAGGATCATTAAAAAAATACGCCTGTGTGAAAGTTAAAATGACTGGATCCAGTGCTGTATACAACCACCTGTTTACCTTTACCTGTTGCTTCCGTGGAATTACGGGTGCTCTTCCTGTTCGCAGGCTTGAGTTACCTTCCACGGGTGTATTTTAAAAACTCGTTTTGTATTTTTGTCTGATTAAAATTTTTAATAAAAGTTAAAACTTTCAACAACGGATCTCTAGGTTCTC
>OTU_1221	AAGTCGTAACAAGGTTTCCGTAGGTGAACCTGCGGAAGGATCATTAACGAGTTAGGGTCTTCTCGGCCCGACCTCCCAACCCTTTGCTTACTTGACCATTGTTGCTTCGGCGAGCCCGTCTTTACTGACCGCCGGGGGACCATAAAACGTCCTCTGGTCCGCGCTCGTCGGTGGCCAACTTTTATAAATTCTTAACTAAACGTGTCATTATCTAAGTACAATTATTAAATAAAAGCAAAACTTTCAACAACGGATCTCTTGGTTCTG
>OTU_1222	AAGTCGTAACAAGGTCTCCGTTGGTGAACCAGCGGAGGGATCATTACCGAGTTTACAAACTCCCAAACCCCAATGTGAACGTTACCATTATCGTTGCTTCGGCGGGATCGCCCCGGGCGCGGCCGAGAGGCCAGCCCCGGACCCAACGTGCGCCCGCCGGAGGACCCCCAAACTCTTTATGTTTTACTGCAGTGTCTCTCTGAGCGGCTCCTAGCGAGCAAACAAACAAATGAATCAAAACTTTCAACAACGGATCTCTTGGTTCTG
>OTU_1223	AAGTCGTAACAAGGTTTCCGTAGGTGAACCTGCGGAAGGATCATTAAAGAGTAAGGGTCTTCTAGGCCCGACCTCCCAACCCTTTGTTTACCAAACCATTGTTGCTTCGGCGGGCCCGTCCCAGGACCGCCGGAGGACCGTCAAACGTCCTCTGGCCCGCGCCCGTCGATGGCCCCTATCATTAAACTCTGAACCAAACGTGTCCTGTCTGAGTGATTATTATCAAAAATTAAAGCAAAACTTTCAACAACGGATCTCTTGGTTCTG
>OTU_1226	AAGTCGTAACAAGGTTTCCGTAGGTGAACCTGCGGAAGGATCATTAACGAATTTAAAAGGTTGTAGCTGGCTCTTTGGAGCATGTGCACGCCTTTCATCTTCAGTTCCACACCTGTGCACCCTTTGTAGGCCGGTTCCGAAAGGAAGTGGCCTATGTTTTCCCTACACACCCCTGTAAAAGTTTCAGAATGTCATTGTGTGGGCTTGCCCTAAGAAGCGAGCTCCTTAAACCTTATACAACTTTCAACAACGGATCTCTTGGCTCTC
>OTU_1227	AAGTCGTAACAAGGTTTCCGTAGGTGAACCTGCGGAAGGATCATTAAAGAGTTAGGGTCTTCTAGGCCCGACCTCCCAACCCTTTGTTTACTGAACCTCTGTTGCTTCGGCGGGCCCGTCTCACGACCGCCGGAGGATCGCTGAAAGGCGTCCTCTGGTCAGCGTCCGCCGATGGCCAACCACTTAAACTCTGAATGAATCGTGTCATATGTCTAAGTCTATGATTAAATTAAAGCAAAACTTTCAACAACGGATCTCTTGGTTCTG
>OTU_1228	AAGTCGTAACAAGGTTTCCGTAGGTGAACCTGCGGAAGGATCATTATTGAAATTACTGGCGAGGGTTGTAGCTGGCCTTTCGGGGCATGTGCACGCCCGAGCCTTTAATCCACATACACCTGTGAACCTAATGTAAGGGCCCGTAAAAAAGGCCCCTACGTCTCATCCACCCCCATCGTATGTCTCATAGAATGTAAATCAATGTCCTCGCCCTAAAAAAGCGTTGATAAACTTATACAACTTTCAACAACGGATCTCTTGGCTCTC
>OTU_1229	AAGTCGTAACAAGGTCTCCGTAGGTGAACCTGCGGAGGGATCATTAACGAGTTAGGGTCTCACCGGCCCGACCTCCCAACCCTTTGTCTACTTGACCATCGTTGCTTCGGCGAGCCCGTCCTCACGGCCCGCCGGAGGGCCTTGACCGGCCCTCTGGCCCGCGCTCGTCGATAGCCCAACCATTAAAATCTTTAACTAAACGTGCCTTAATCTAAGTACAATTATTAAATAAAAGCAAAACTTTCAACAACGGATCTCTTGGTTCTG
>OTU_123	AAGTCGTAACAAGGTTTCCGTAGGTGAACCTGCGGAAGGATCATTAACAACGTATCCTAAACGTAAAAAACCCCCCCTGTGAACTTTCATAACCCGAGCTTGCTAGGCCCGCGAAATTCAGCAATCCCTGGTAAATCATTGTTGACCAGCTCTTTGAGTCAGGGATATCCGAACTAGTCGTGTGGATTAAGTTCCAGAGCGGTGAGGCAAGTGACCCGGTACCCCCAAGCAATCAATGTTCTGTCAGTGTCGTTGATTGTGTAAGGGTGGCGCAGTAAACGATCGCTGGAGGCCACCACGGCCGGCGACTGGGTCAGCGAGCTCTGCTCCTTAATAACCCCACCTAAGGATTAGCTCGGCGAAAGCTTGAGCACCAAAAACTAATACGACTGTTAACAA…
>OTU_1230	AAGTCGTAACAAGGTTTCCGTAGGTGAACCTGCGGAAGGATCATTAACAGGAGGTTCCTGTGGACACGCGCCCGCCTTGCGGGGCACAGGATCGTCAAGCGTGGCTGTTCCGTGTTGCTGTTTGTTGTTCCTGGCGAGTCGGCACGATGCAGGCTGGGAGGGCTGGCCTGCGGCTCGCCAACGGATGATCATTCCAAATGTGTAAACGATAGCGCGCCAAGCGCTGACTAATCTGTACAACTGTTAGCAATGGATCACTTGGTTCTC
>OTU_1231	AAGTCGTAACAAGGTTTCCGTAGGTGAACCTGCGGAAGGATCATTAATTATGTTAAAGCGCCTTACCATCAGGGTTTCCTGGGGTAAGTGATTGCTTCTACACTGTGAAAATTTGGCTGAGAGACTCAGACTGGTCATGGGTAGATCTATCTGGGGTTTGATTGATGCCACTCCTGGTTTCAGGAGCACCCTTCATAATAAACCTAGAAATTCAGTATTATAAAGTTTAATAAAAAACAACTTTTAACAATGGATCTCTTGGTTCTC
>OTU_1232	GAGTCGTAACAAGGTCTCCGTTGGTGAACCAGCGGAGGGATCATTATCGAAGTTACTCTTCATACCCATTTGTGAACACTACCCCATTGCCGCGCGTTGCCTCGGCGGTGAGGTCCGCGGGGGGGATGGGCTGCGCTCCGGCGCTTGcccccccctccccgggcccccGCCGGCCGCGCCTTACTCTTAATTTGCAAAGCGGACTGTACGATCTGATTAATCTTGATAAACAAGTCAAAACTTTCAACAACGGATCTCTTGGTTCTG
>OTU_1235	AAGTCGTAACAAGGTTTCCGTAGGTGAACCTGCGGAAGGATCATTAACGAGTTAGGGTCTCTCTGGCCCGACCTCCCAACCCTATGTTTATTGAACCTCTGTTGCTTCGGCGGACCCGCCTCACGGCCGCCGGAGGACCGCTGCAAGGCGTCCTCTGGCCAGCGTCCGCCGATGGCCAACCACTTAAACTCTGAATGAATCGTGTCATATGTCTAAGTCTATGATTAAATTAAAGCAAAACTTTCAACAACGGATCTCTTGGTTCTG
>OTU_1236	AAGTCGTAACAAGGTAACCGTAGGTGAACCTGCGGTTGGATCATTACAAATGAACCACCTTAGGGTCGAGTCTCTGCTAGCTTGCTGGCTTTGATTCCTCTAGGGTATAAACACCTGTGCACTGTATCGTTTTGGACGTTGAGAGAGTAATGTGTGATAGGGTAAAACCGGTCCTGCTCTCGGCGTTGTCAACCAACCTATCAATTCAAACTGATTTTTTTCTATACGAAATAAAAACAACTTTTGACAACGGATCTCTTGGCTCTC
>OTU_1238	AAGTCGTAACAAGGTTTCCGTAGGTGAACCTGCGGAAGGATCATTAACGTGTTCGTTCGGCCGCTCGGGTCGGCCCTGCACCGGCGGAGACGCCGTGCTGCGGGCTCTCGGGCGTGCCTTCCAAACCAAACCCCTGTGAACCTTTGGGAAGGCCGAGCCCTCGCGGCGAAGTCGTCCCCTTTACAAACTCTGTATATCAAAGAATGACCGCGGACATCGTCTGCCTAAACACATAACAACTTTCAACAACGGATCTCTTGGCTCTC
>OTU_1239	AAGTCGTAACAAGGTTTCCGTAGGTGAACCTGCGGAAGGATCATTCACAATAAGTGTTTATGGCACTTTCAAATCCATACCCACCTTGTGTGCATTGTAAAGGCCCTTTTCAActctctctctctctctctctctcCCTTgggggggagaggggggAAAAGGGAGGATTGGGCTTTATTTTCTCACACGTCTTCAATTGCAAGTCTAACCTTCAGAGTAATAAAAAAACTCGAATACAACTTTCAACAACGGATCTCTTGGCTCTC
>OTU_124	AAGTCGTAACAAGGTTTCCGTAGGTGAACCTGCGGAAGGATCATTAACAACGTATCCTAAACGTAAAAAACCCCCCCTGTGAACTTTCATAACCCGAGCTTGCTAGGCCCGCGAAATTCAGCAATCCCTGGTAAATCATTGTTGACCAGCTCTTTGAGTCAGGGATATCCGAACTAGTCGTGTGGATTAAGTTCCGTGAAGCAAGAGCGGTGAGGCAAGTGACCCGGTACCCCCAAGCTTCTGTCAGTGTCGTTGATTGTGTAAGGGTGGCGCAGTAAACGATCGCTGGAGGCCACCACGGCCGGCGACTGGGTCAGCGAGCTCTGCTCCTTAATAACCCCACCTAAGGATTAGCTCGGCGAAAGCTTGAGCACCAAAAACTAATACGACTGTTAACAA…
>OTU_1240	AAGTCGTAACAAGGTTTCCGTAGGTGAACCTGCGGAAGGATCATTAAAGAGTTAGGGTCTACTCGGCCCGACCTCCCTACCCTGTGTTTACTTAACCATCGTTGCTTCGGCGGGCCCGTCTTTGGACCGCCGGAGGACCGTCGTAGGTCCTCTGGCCCGTGCCCGCCGGTGGCCAACCTTAACAAATTCTTAATTATACGTGTCCTTGTCTGAGTAAATGAAATAAATAAAGCAAAAAACTTTCAACAACGGATCTCTTGGTTCTG
>OTU_1241	AAGTCGTAACAAGGTTTCCGTAGGTGAACCTGCGGAAGGATCATTACAATTCAGTAGCTTGCTACTGTCGGGAGGTGCTGTAAGCCCGCATAGTTTTATTACTGATGAGCGGCAGGCCCTCTGTCTGTACCCTTGTCTTTTGCGCACTCATGTTTCCTCGGCGGGCTTGCCCGCCGGCTGGACAATACTATAACCTTTTTAATTTTCAATCAGCGTCTGAAAAAACTTAATAATTACAACTTTCAACAACGGATCTCTTGGTTCTG
>OTU_1242	AAAGTCGTAACAAGGTCTCCGTAGGTGAACCTGCGGAGGGATCATTACACAATAAAATATGAAGGCTGTACGCGGCTGTGCTCTCGGGCCAGTTTTGCGGAGGCTGAATTATTTATTACCCTTGTCTTTTGCGCACTTGTTGTTTCCTGGGCGGGTTCGCCCGCCACCAGGACCACATCATAAACCTTTTTTATGCAGTTGCAATCAGCGTCAGTATAACAAATGTAAATCATTTACAACTTTCAACAACGGATCTCTTGGTTCTG
>OTU_1243	AAGTCGTAACAAGGTCTCCGTAGGTGAACCTGCGGAGGGATCATTACACAAAAAATATGAAGGCTGTATGCGCTGGCGCCTCCGGGCACCAGTAGCGGAGGCTGAACTATTTTTCCACCCATGTCTTTTGCGTACTTGTTGTTTCCTGGGCGGGTTTCGCCCGCCACCAGGGCCACATCATAAACCttttttttAAATTGTAATCCGCGTCAGTATAACAAATGTTAAATCATTTACAACTTTCAACAACGGATCTCTTGGTTCTG
>OTU_1244	AAGTCGTAACAAGGTCTCCGTAGGTGAACCTGCGGAGGGATCATTAACGAGTTAGGGTCTCACCGGCCCGACCTCCCAACCCTTTGTCTACTTGACCATCGTTGCTTCGGCGAGCCCGTCCTCACGGACCGCCGGGGGGTTCTGAGCCCTCTGGCCCGCGCTCGTCGACAGCCCCTAAAATTTAAAATCTTCACTAAACGTGTCTTGAATCTAAGTATTATTGTTAAATAAAAACAAAACTTTCAACAACGGATCTCTTGGTTCTG
>OTU_1245	AAGTCGTAACAAGGTTTCCGTAGGTGAACCTGCGGAAGGATCATTAATAAACCTAGTCGTTCGCGTACATAGGGGCAACCCTCGCGTGATGTCAGCAATACCTAGGTAACCCTTGAATAAACTACCCTTGTTGCTTTGGCGGGTCGCCTTTTAGGCCAGCGGCTTCGGCTGCTGCGTGCCCGCCAGAGGACCACAACTCTTGTTTTTAGTGATGTCTGAGTACTATATAATAGTTAAAACTTTCAACAACGGATCTCTTGGTTCTG
>OTU_1246	AAGTCGTAACAAGGTCTCCGTAGGTGAACCTGCGGAGGGATCATTACACAAAAAATATGAAGGCTGTATGCGCTGGCGCCTCCGGGCACAGTGGCGGAGGCTGAACTATTTTTCCACCCATGTCTTTTGCGTACTTGTTGTTTCCTGGGCGGGTTCGCCCGCCACCAGGACCACACCATAAACCTTTTTTTATGTAGTTGCAATCAGCGTCAGTATAACAAATGTTAAATCATTTACAACTTTCAACAACGGATCTCTTGGTTCTG
>OTU_1247	AAGTCGTAACAAGGTTTCCGTAGGTGAACCTGCGGAAGGATCATTAAAGAGTTAGGGTCTTCTCGGCCCGACCTCCCAACCCCATGTTTATTAAACCTGTGTTGCTTCGGCGGGCCCGTCTTCGTGACCGCCGGAGGATCGTCGAAAGGCGTCCTCTGGCCCGCGCCCGCCGATGGCCTACGCTTAAAATTCTGAATCAACCGTGTCTCATGTCTAAGTCCTTCATAAATAAAGCAAAACTTTCAACAACGGATCTCTTGGTTCTG
>OTU_1248	AAGTCGTAACAAGGTTTCCGTAGGTGAACCTGCGGAAGGATCATTACCGAGTGTAGGGTTCCTAGCGAGCCCAACCTCCCACCCGTGTTTACTGTACCTTAGTTGCTTCGGCGGGCCCGCCGCTTGTCGGCCGCCGGGGGGGCGCCTCTGCCCCCCGGGCCCGTGCCCGCCGGAGACCCCAACACGAACACTGTCTGATCTAGTGAAGTCTGAGTTGATTGTATCGCAATCAGTTAAAACTTTCAACAATGGATCTCTTGGTTCCG
>OTU_125	AAGTCGTAACAAGGTTTCCGTAGGTGAACCTGCGGAAGGATCATTAACAACGTATCCTAAACGTAAAAAACCCCTGTGAACTTTCATAACCCGAGCTTGCTAGGCCCGCGAAATTCAGCAATCCCTGGTAAATCATTGTTGACCAGCTCTTTGAGTCAGGGATGTCCGAACTAGTCGTGTGGATTAAGTTCCGTGAAGCAAGAGCGGTGAGGCAAGTGACCCGGTACCCCCAAGCAATCAATGTTCTGTCAGTGTCGTTGATTGTGTAAGGGTGGCGCAGTAAACGATCGCTGGAGGCCACCAGGCCGGCGACTGGGTCAGCGAGCTCTGCTCCTTAATAACCCCACCTAAGGATTAGCTCGGCGAAGCTTGAGCACCAAAAACTAATACTGTTAACAA…
>OTU_1251	AAAAGTCGTAACAAGGTCTCCGTTGGTGAACCAGCGGAGGGATCATTACCGAGTTATACAACTCCCAAACCCACTGTGAACCTTACCTCAGTTGCCTCGGCGGGAacgccccggccgcctgcccccgcgccggcgccggacccaggcgcccgccgcAGGGACCCCAAACTCTCTTGCATTACGCCCAGCGGGCGGAATTTCTTCTCTGAGTTGCACAAGCAAAAACAAATGAATCAAAACTTTCAACAACGGATCTCTTGGTTCTG
>OTU_1252	AAGTCGTAACAAGGTCTCCGTTGGTGAACCAGCGGAGGGATCATTAGAGGGTCGCGAGACCTCCCTAATACCTTCAACCAACCCGCGTACCTACCCGAGGGAAACATGATGCCTCGGTCGGCGGCCCCAGGGGGGGCCTCTGCCCACGCGCCTTCCGGGGCGCGGGGGTGCCGGCCGGCGGCCAAAAACAAACTTGAACGTTATAATAACCAATTCTTTACAAACCAAAACCATTACAACCTGCAACGATGGATCTCTTGGCTCTG
>OTU_1254	AAGTCGTAACAAGGTCTCCGTTGGTGAACCAGCGGAGGGATCATTACCGAAGTTACCCTTCAAAAACCCTTTGTGAACCTTACCTCTTGCCGCGTTGCCTCGGCGGGAGGCGGTGGGAACGTCGCGCTCGCGCCCCTAACCGGGCCGTGCCGCCGCCCCGCCGTCCCCGCCGGCAGCGCCAAAACTCTATTTGCACAGCGGACTGTATGTTCTGATTTATaaaaaaaaaCAAGTTAAAACTTTCAACAACGGATCTCTTGGTTCTG
>OTU_1255	AAGTCGTAACAAGGTCTCCGTAGGTGAACCTGCGGAGGGATCATTCACATGATTTACTTTAATAAACAAACTGTGAACTTTATATAAAATACTATTCGTGTGTGGTAACTTCGGTTATTATCACACTGTCATTCGATGAACATTAGATAGCTGGCTCGTTTTTTATGAAACTTTCTCAGCTGATTTGTTTTTGTTAGACTAAACATCTATTCAATACAATCAACCAAACATAGAAACAACTCTATGCCCTGGATATCTTGGTTCTC
>OTU_1256	AAGTCGTAACAAGGTTTCCGTAGGTGAACCTGCGGAAGGATCATTAAAAAAATACGCCTGGTGAAAGTGAGAAACCGCTGAATCCAGTGCTGTATACAACCACCTGTTTACCTTTACCTGTTGCTTCCGTGGAATACGGGTGCTCTCCCTGTTTGCAGGTTAGAGTTACCTTCCACGGGTGTATCTAAAAACTCGTTTTGTATTATTGTCTGATCTAAAATTTTAATAAAAGTTAAAACTTTCAACAACGGATCTCTAGGTTCTCG
>OTU_1257	AAGTCGTAACAAGGTTTCCGTAGGTGAACCTGCGGAAGGATCATCATTGAACCTCTAAATATCAACAACACCTGTGTGAACAGTTCGGGGGCTGGGAGAGCGCGTGGCTTCGGCCTGGGCTCGCCCGCCTTCATTTTTTTCCTCTTTCGAGGAAGAAAACGAAAACCCCTCTCTTCTCCTGATCTCTTGACATACTCCAAATGTTATCGCGAGATAACGCTTGAAAACAAAAAGACAACTTTTAACAACGGATCTCTTGGCTCTC
>OTU_1258	AAGTCGTAACAAGGTTTCCGTAGGTGAACCTGCGGAAGGATCATTATTGAGTAAACCTGATGTGGCTGTTAGCTGGCTTAGGCATGTGCTCGTCCATCATCTTTATATCTCCACCTGTGCACATTTTGTAGACTTGGATAATGGCTCTGTCATTTACAAGACTATGTTTTCAATATACCCAAAGCATGTTTAAAGAATGTCACCAATAGGAACTTGTTTCCTATTAGAAACTATACAACTTTCAGCAACGGATCTCTTGGCTCTC
>OTU_1259	AAGTCGTAACAAGGTCTCCGTTGGTGAACCAGCGGAGGGATCATTACAGAGTTGCAAAACTCCCTCACACCATCGTGAACCATACCTTCCAACCGTTGCTTCGGCGGGTTCGGGCCGCCCCGGCCTCGGCCGGGGGGGCCCTCCTTCGCCCCCGTGGAGGGGGCGGCCCGCCGGAGGTACACAAAACTCCTTGACACTTGTACGGCCTCTCTGAGTCTCTGTACTGAATAAGTCAAAACTTTCAACAACGGATCTCTTGGTTCTG
>OTU_126	AAGTCGTAACAAGGTTTCCGTAGGTGAACCTGCGGAAGGATCATTAACAACATATCCTAACTAAAAAACCCTGTGAACTTTCAACCCCAAATCGCTTGATCCGAGTACCTCAGCAATCTCTGGTAAATCATTGTGAACAGCTTTGAGTCAGAGACCTCTGAATAACCTTGCGCGGTCGCGGTTGGTGAGGCAAGTGACCTGGTACCCTCAAGACCAGTGTTCAATGATCTGTCAGTGTTCATTGACTGGAATCAAACGTTCTGTCAGTGTGCGTTTGATTTGCAAGGGTGGCGCAGTAAACGATCGCTGGAGGCCGACACGGCCGGCGACTGGGTCAGCGAGCTTTGCTCCTCCCAATTAGTGAAAGCTATTGGGCTATAACTAAACGACTGTTAACAA…
>OTU_1260	AAGTCGTAACAAGGTCTCCGTAGGTGAACCTGCGGAGGGATCATTACCGAGTTAGGGTCTCACCGGCCCGATCTCCCAACCCGTTGTCTACTTGACCATCGTTGCTTCGGCGAGCCCGTCCTCATGGACCGCCGGGGGGCCTTCGTGCCCCCGGGCCCGCGCTCGTCGATAGCCCCCCATTTAAAATCTTAATTAAACGTGTCTTGAATCTAAGTATTATTGTTAAATAAAAACAAAACTTTCAACAACGGATCTCTTGGTTCTG
>OTU_1261	AAGTCGTAACAAGGTTTCCGTAGGTGAACCTGCGGAAGGATCATTAAAAAGTGGTGGTGTCAATCACCCCCCTAGGCTACTAATGCTTGGGCTTGCCCTTGCTAACTAGCCTAGGCCACTTCACCCTTGATAAAATACCATTGTTGCTTTGGCAGGTCGTGGCCTCGGCCCGCAGCGCCTGCCAGAGGACCCAAACTCTTTTGTTATGTGACGTCTGAGTACTATATAATAGTTAAAACTTTCAACAACGGATCTCTTGGTTCTG
>OTU_1262	AAGTCGTAACAAGGTTTCCGTAGGTGAACCTGCGGAAGGATCATTACCCTATACCATCGGGGGGCCGGCCCTGGAGATTGCGGCATCCATCGTGGAAGCCCACTCTTCTGTCCGCCCTGTCTGAATATACCCATGATTTTTGCGTACTCATTGTTTCCTCGGCAGGCTTGCTTGCCAGTAGGACCTTTTTCAACCTTTTGGAATTGCAGTCAGCGTCAGACAAACTTAATAGTTACAACTTTCAACAACGGATCTCTTGGTTCTG
>OTU_1263	AAGTCGTAACAAGGTTTCCGTAGGTGAACCTGCGGAAGGATCATTACCGAGTTAGGGTCTTCTCAGGCCTGATCTCCCACCCTGTGTCTACTTAACCACGTTGCTTCGGCGGGCCTGTCTGGACTGACGTCCGGACTGCCGGGGGGTCTCATCGCCCCTGGCTCGTGCCCGTCGGTGGCCTCCCATTAAATTCTGATGAATTGTGTCGTCTGAGTCTGAATTTAATTAAAAACAAAAACTTTCAACAACGGATCTCTTGGTTCTG
>OTU_1264	AAGTCGTAACAAGGTCTCCGTTGGTGAACCAGCGGAGGGATCATTACAAGAAGCGCCGAAAGGCTGCTTATAACCATCGCGAACCTATCCATCAGCGTTGCTTCGGCGGGAGCGCTCGCGGGCCCGGTCCTCCGGGCCCCGAGCCGGGGCTCCACCCCTGGGTGGGGCCGCCCGCCGGAGGTACGAAACTCTTTTGCATCTCTGTGGCATCTCTGAGTAAACAAGCAAATAATCAAAACTTTCAACAACGGATCTCTTGGTTCTG
>OTU_1265	AAGTCGTAACAAGGTTTCCGTAGGTGAACCTGCGGAAGGATCATTaaaaaaaaaaTACGCCTGGTGCAGTGCTAACACACTAATCCAGGTTGTATATAACCACCTGTTTACCTTTACCTGTTGCTTCCGTGGAATACGGGTGCTCTTCCTGTTCGCAGGCTTGAGTTACCTTCCACGGGTGTATTCAAAAACTCGTTTTGTAATTTTGTCTGATTTAAAATTTTAATTAAAGTTAAAACTTTCAACAACGGATCTCTAGGTTCTC
>OTU_1266	AAGTCGTAACAAGGTCTCCGTAGGTGAACCTGCGGAGGGATCATTACAGAGTTCGTGCCCTCACGGGTAGATCTCCCCACCCTTGTGTATCTCCGTATTCTTGTTGCTTTGGCAGGCCGCTGGGCTTCGGCCTGGCCACCGGCTCGGCCACCGGCTCCTGGGGCTGGTGCGCGCCTGCCAGAGGACCTCTCAAACTCGGTTTGTTACTGTCGTCTGAGTACTATAACAATCGTTAAAACTTTCAACAACGGATCTCTTGGTTCTG
>OTU_1267	AAGTCGTAACAAGGTTTCCGTAGGTGAACCTGCGGAAGGATCATTATCGTACAACCGAGGTGCGAGGGCTGTCGCTGACCTTCAAAGGTCGTGCACGCCCGAGCGCTCTCACACAATCCATCTCACCCCTTTGTGCATCACCGCGTGGGTCCCCCCTTTGCGGGAGGGTTCGCGTTTTCACATAAAACTTGATACAGTCTAGAATGTTTATTTTTGCGGTCGCACGCAATCAATACAACTTTCAACAACGGATCTCTTGGCTCTC
>OTU_1268	AAGTCGTAACAAGGTTTCCGTAGGTGAACCTGCGGAAGGATCATTATCGTACAACCGAGGCACGAGGGCTGTCGCTGACTTTTCGTCGTGCACGCCCAAGTGCTCTCAACCATCCATCTCACCCTATGTGCACCACCGCGTGGGTTCTCTTTTGGCTCGTCCCGAAGGGGGCTCGCGTTTTCACACAAACTCGATACAGTGTAGAATGTCTCTTTGCGATAACACGCAATTAATACAACTTTCAACAACGGATCTCTTGGCTCTC
>OTU_1269	AAGTCGTAACAAGGTTTCCGTAGGTGAACCTGCGGAAGGATCATTACAAATCCATCACGTCTCTCTCGAGACCACGTTGAAATGTTCCCCAAGCCGAGCCTCAGATCTACCCCAAACTGGCCTACGTTCGTCAGAACGCACCTGGCCGGGGATCTGCAGGATCGATTGGGCTTATTAAACTAGTCTTCCTGTTGCACAATTGTATCTGGATTCATCCATCAAATGAAAACTTGTACAACTTATAACAATGGATCTCTAGGCTCTT
>OTU_127	AAGTCGTAACAAGGTTTCCGTAGGTGAACCTGCGGAAGGATCATTAACCTAAACGTAAAAAACCCCCCCTGTGAACTTTCATAACCCGAGCTTGCTAGGCCCGCGAAATTCAGCAATCCCTGGTAAATCATTGTTGACCAGCTCTTTGAGTCAGGGATATCCGAACTAGTCGTGTGGATTAAGTTCCGTGAAGCAAGAGCGGTGAGGCAAGTGACCCGGTACCCCCAAGCAATCAATGTTCTGTCAGTGTCGTTGATTGTGTAAGGGTGGCGCAGTAAACGATCGCTGGAGGCCACCACGGCCGGCGACTGGGTCAGCGAGCTCTGCTCCTTAATAACCCCACCTAAGGATTAGCTCGGCGAAAGCTTGAGCACCAAAAACTAATACGACTGTTAACAA…
>OTU_1270	AAGTCGTAACAAGGTTTCCGTAGGTGAACCTGCGGAAGGATCATTACTGAGTGAGGGTTCCTTCGGGGCCCAACCTCCCACCCTTGTATACTGTACCAAGTTGCTTCGGCGGGCCCGCCGTTCGCGCGGCCGCCGGGGGGGAACCCCTCCCCCCGGGCGAGCGCCCGCCGGAGACCCCAACGTGAACACTGTCTGAAGTTTTGTCGTCTGAGTTCGATTGTATCGCAATCAGTTAAAACTTTCAACAATGGATCTCTTGGTTCCG
>OTU_1272	AAAGTCGTAACAAGGTAACCGTAGGTGAACCTGCGGTTGGATCATTACAAAATTGGTTTACACCAAACATTGTGTGCACTATATCTGTCTCTGGTGGTTCTCGTGCTTGCTTGCAAGCCTGCCTTCGGGCTGGATCACCAAACATGAGCATTTGGAGCGTTTCGACGTTTCACTTGTTTATGAAAAACTTTTTACTAATTTTATGTCTGAATCATTCACCAAGTGAATTGAAAAACAACTTTTGACAACGGATCTCTTGGCTCTC
>OTU_1275	AAGTCGTAACAAGGTTTTCGTAGGTGAACCTGCGGAAGAATCATTAAAAAAATATGCCTAATGAAAGTTAAAATGACTGAATCCAGTGCTATATACAACCACCTGTTTACCTTTACCTGTTGCTTCTGTGGAATTACAGGTGCTCTTCCTGTTCGCAGGCTTGAGTTACCTTCCATGGGTGTATTTTAAAACTCGTTTTATATTTTTGTCTGATCTAAATTTTTAATAAAAGTGAAAACTTTCAACAACGGATCTCTAGGTTCTC
>OTU_1276	AAGTCGTAACAAGGTTTCCGTAGGTGAACCTGCGGAAGGATCATTCACAATAAGAGTGTTTATGGCACTCTTCAAAAAAATCCATACCCACCTTGTGTGCAACGTAAGAAGAAAAAAGAAGATGCGAGTCATGGGGAAACCCAAGTCTTGCTCTCTTTCTTTTTTCTTTTCCACATACACCTTTCTATTAGTTCCTATTGTCTGAAGCTGTTAGAGAATGACTAATTCTTAAACATAACCTTCAACAACGGATCTCTTGGCTCTC
>OTU_1277	AAGTCGTAACAAGGTTTCCGTAGGTGAACCTGCGGAAGGATCATTAAACCTTATACTTCGGGGGGCCGGCGTTGAATAGCAGTTCCATTGTGGATCAGCTTTTCTCCCCGCCCTGTCTGAATATTACCCATGCTTTTTGCGTACCCATTGTTTCCTCGGCAGGCTTGCCTGCCAGCAGGACCCCTTTAAAACCTTTTGCAATTGCAGTCAGCGTCAGAAAAAAACTTAATAGTTACAACTTTCAACAACGGATCTCTTGGTTCTG
>OTU_1278	AAGTCGTAACAAGGTCTCCGTTGGTGAACCAGCGGAGGGATCATTACAGAGTTGTCAAGACTCCATAAACCATTGCGAACCTACCTTAAACCGTTGCTTCGGCGGGTTCGGGCCGCGCCGGCCCGGTGCGAACCGGACCGGGGTTGGCACCCTGGCCCTCCCGGGCCGCCCGCCGGAGGTATAACAACTCTTGATCTTTGCGTGGCCTCTCTGAGTCTCCTATTTGAATCAGTCAAAACTTTCAACAACGGATCTCTTGGTTCTG
>OTU_1279	AAGTCGTAACAAGGTAACCGTAGGTGAACCTGCGGTTGGATCATTAATAAATTTGAAGCTCTGCTTCACAAACACCGTGTGCACTGTTTACTGTCTCTGGCAGGATCAGGGATGCAATGTCCCCCCTGTCAAAGGAGTGGGTCGCCCTTTGGGCGGCTTCCATTCTGATTTGAACAACCCTATGTTTGTTTCAATTTGTCTGAATAATTCTTCACCTAGTGTGAGAAATTGAAAACAACTTTTGGCAACGGATCTCTTGGCTCTC
>OTU_128	AAGTCGTAACAAGGTTTCCGTAGGTGAACCTGCGGAAGGATCATTAACAACGTATCCTAAACGTAAAAAACCCCCCCTGTGAACTTTCATAACCCGAGCTTGCTAGGCCCGCGAAATTCAGCAATCCCTGGTAAATCATTGTTGACCAGCTCTTTGAGTCAGGGATATCCGAACTAGTCGTGTGGATTAAGTTCCGTGAAGCAAGAGCGGTGAGGCAAGTGACCCGGTACCCCCAAGCAATCAATGTTCTGTCAGTGTCGTTGATTGTGTAAGGGTGGCGCAGTAAACGATCGCTGGACGGCCGGCGACTGGGTCAGCGAGCTCTGCTCCTTAATAACCCCACCTAAGGATTAGCTCGGCGAAAGCTTGAGCACCAAAAACTAATACGACTGTTAACAA…
>OTU_1280	AAGTCGTAACAAGGTTTCCGTAGGTGAACCTGCGGAAGGATCATTAATAAATATACTGTGACCCGCAAGGGTCTAATGTATCCACCCTTTGTGAAACTTCTATTTTTGCTTCGGCAGCGCTCCCAGTGGTTAACACCTGCTGGTGGGATAAGGCTGTCAGAAGACCCAACAAAACTAGTTTGATGAAATGTCATGCAGTCTGATAACCATTTTTTGAGAAATCAAATTATGTTAAAACTTTCAGCAACGGATCTCTTGGTTCTC
>OTU_1281	AAGTCGTAACAAGGTTTCCGTAGGTGAACCTGCGGAAGGATCATTACCGAGTGTAGGGTTCCTAGCGAGCCCAACCTCCCATCCGTGTCTATTGTACCCTGTTGCTTCGGCGGGCCCGCCGCTTGTCGGCCGCCGGGGGGGCGCCTCTGCCCCCCGGGCCCGTGCCCGCCGGAGACCCCAACACGAACACTGTCTGAAAGCGTGCAGTCTGAGTTGATTGAATGCAATCAGTTAAAACTTTCAACAATGGATCTCTTGGTTCCG
>OTU_1282	AAGTCGTAACAAGGTTTCCGTAGGTGAACCTGCGGAAGGATCATTACCGAGTGAGGGCTCCCTCGTGAGCCCAACCTCCCACCCGTGTTTTAAACATACCCTGTTGCTTCGGCGGGCCCACTGGGCTTCGGTCCGGTCGCCGGGGGGCCTCTGTGCCCTCGGGTCCGCGCCCGCCGATGCGCCTCATGAACCCTGATGAATATGGGCTGTCTGAGTTATAAATGAAAATTGTCAAAACTTTCAACAATGGATCTCTTGGTTCCG
>OTU_1283	AAGTCGTAACAAGGTTTCCGTAGGTGAACCTGCGGAAGGATCATTAAAAAATATAGAATTAATCTTCTGTAAACCCAATCTGCGTATTTCTACCTGTTGCTTTCGTGAGACTGTGAACGCAAGTTCCCTCTGGCGCTGTTTTTAGGAACAGCTGTTGGGGAGTGCTCACGGGAGGTAATTATAAACTCTGttttttttGAATTTTGTCTGAATATTGTTTATACATAAACTTTAAAACTTTCAACAACGGATCTCTTGGTTCTC
>OTU_1284	AAGTCGTAACAAGGTCTCCGTTGGTGAACCAGCGGAGGGATCATTACAGAGTTGCAAAACTCCAACAAACCATCGCGAATCTTACCCGTACGGTTGCCTCGGCGCTGGCGGTCCGGAAGGCCCTCGGGCCCCCCGGATCCTCGGGTCTCCCGCTCGCGGGAGGCTGCCCGCCGGAGTGCCGAAACCAAACTCTTGATATTTTATGTCTCTCTGAGTAAACTTTTAAATAAGTCAAAACTTTCAACAACGGATCTCTTGGTTCTG
>OTU_1285	AAGTCGTAACAAGGTTTCCGTAGGTGAACCTGCGGAAGGATCATTACCGAGTTAGGGTCCTCAAAGGCCCGATCTCCCAACCCTTTGCTTATTATACCTTGTGTTGCTTCGGTAGGTCTGGCTCGTCCTACCGGAGGACCGGAAAACGTCCTCTGGAGAGTGCCTACCGATAGCCCCAACCAAAAACTCTTGAACAAAACATGTATTGTCTGAGTAAACAAAAAAATTAAAGCAAAACTTTCAACAACGGATCTCTTGGTTCTG
>OTU_1286	AAGTCGTAACAAGGTCTCCGTTGGTGAACCAGCGGAGGGATCATTACCGAAGTTACCCTTCTAAACCCATTGTGAACCTTACCTCTTGCCGCGCGTTGCCTCGGCGGGGAGGCGGGGGTGGGTCGGCGCGCCCCTCTGCGGGCCGCCGTCCCCGCCCCCGTCCCCGCCGGCCGCGCCAAACTCTAAATTTGCAAAGCGGACTGCATGTTCTGATTTAAAACAAAAAACAAGTAAAAACTTTTAACAACGGATCTCTTGGTTCTG
>OTU_1287	AAGTCGTAACAAGGTTTCCGTAGGTGAACCTGCGGAAGGATCATTAACTATGCTCACGCATAACCTTTAGCTCGTGGCGGGCAACCGCCGCTGAGTGACCACCCTTTGTGAACCTTTATTTTTTGCTTCGGCAGCGCGCCCTCACGGGTGGTAAGGCTGCCGACAGCCCACATCATAAACTATTTTTGTTACCAAAACCATGCAGTCTGATTATCTGATAAATTTTAAAAGTTAAAACTTTCAGCAACGGATCTCTTGGTTCTC
>OTU_1288	AAGTCGTAACAAGGTTTCCGTAGGTGAACCTGCGGAAGGATCATTAAAAGAAATTGGTTATACATTTCATGTATCAACTGTTTAAACCCATTCTGTGTACCTTGCCTGTTGCTTCCATGGAGCCTGACTTTGGTCACTCTTGTGATGTAAATCCCAAGGGAGTCGCCATGGAAGGTCATCAATAAAACTCATGTATCCAATGTCTTCTGTCTGAACTGTTTATAACAAATGTTAAAACTTTCAACAACGGATCTCTTGGTTCTC
>OTU_1289	AAGTCGTAACAAGGTTTCCGTAGGTGAACCTGCGGAAGGATCATTAACACGTATCCATACGTATTATATACCAAACCGTGAACTCGTTTGTAACAATTTGAAGTAGAGGTTGGGAAACTAACTTTCTGCTGTATCTTATTACAATCTATAAACCACTTGTAAACCAATTGAACTAAACCTAAGAATGTGATTGGCTAACGCCTAATTACAATCTGTATTTACGAAACGTAAAAACAATTCTTAGCAACGGATATCTTGGTTCTC
>OTU_129	AAGTCGTAACAAGGTTTCCGTAGGTGAACCTGCGGAAGGATCATTAACAACGTATCCTAAACGTAAAAAAACCCCCTGTGAACTTTCATAACCCGAGCTTGCTAGGCCCGCGAAATTCAGCAATCCCTGGTAAATCATTGTTGACCAGCTCTTTGAGTCAGGGATATCCGAACTAGTCGTGTGGATTAAGTTCCGTGAAGCAAGAGCGGTGAGGCAAGTGACCCCCAAGCAATCAATGTTCTGTCAGTGTCGTTGATTGTGTAAGGGTGGCGCAGTAAACGATCGCTGGAGGCCACCACGGCCGGCGACTGGGTCAGCGAGCTCTGCTCCTTAATAACCCCACCTAAGGATTAGCTCGGCGAAAGCTTGAGCACCAAAAACTAATACGACTGTTAACAA…
>OTU_1290	AAGTCGTAACAAGGTTTCCGTAGGTGAACCTGCGGAAGGATCATTACCTGGCCTTGGGCCGCTCGCGGGAGCTAGTCGCTTGCGACGACGCTGCCGAGGGTGCTTAGCCCTTGACTATCACCTTGACTACGTGCACCTTTTGTTGTTTCCTCGGCAGGTCATCTGCCGCCAGGAACCCCCTAAACCTTTTTGCAACAGCATCCAAAACTTCTGAAAACAAACCAAAATTATTTACAACTTTTAACAATGGATCTCTTGGTTCTG
>OTU_1291	AAGTCGTAACAAGGTTTCCGTAGGTGAACCTGCGGAAGGATCATTATCGATTCAAAAAGGATGTGCTGGCCACAAGGCATAAGTGCACTCCGAATCCACATCTCCCTGTGCACTTACTGTGGGTAAAATGGGCTTTGTCCCAATTGCTCATGCATTTTTACACTCTTATCATATATCATGAATGTACACAGAGTAGGCTTTGTTTCAAAGCTGAAAAATAAAAATAAAACAATACAACTTTCAACAATGGATCTCTTGGTTCTC
>OTU_1292	AAGTCGTAACAAGGTTTCCGTAGGTGAACCTGCGGAAGGATCATTAATGAATGAACTTTTCAAAGTTTTTTCATATCCCCTATGTTTATATTAAATACGTTCCTTCCATCGGACAGGTTATTAGGACCCTCCAGCTTGGGCAAATGCCCTTGCTGGGGAGCTGCCGGTGGCGTCATCAATAAAAGAAAACTTTTTTTATCATAAAACTGTCTGAATTACTTTTGAAATGAAATAAAACTTTCAACAACGGATCTCTAGGCTCTT
>OTU_1293	AAGTCGTAACAAGGTTTCCGTAGGTGAACCTGCGGAAGGATCATTAACGAATTAATTGAGGTTGTGCTGGTTCTTACAAGTGCACGCCTCTTACAATTCCATTCACACCCCTTGTGCACTCTAAGAGACGTATCTCCCCCGTTTACGTGCCTTAATTGGCTTGGGATTTCGTCTGTTTAACACACTCTTATTGTAATAGAATGTAATTCGGCGGAAACGCCTAAACTTATAATATAACTTTCAACAACGGATCTCTTGGTTCTC
>OTU_1294	AAGTCGTAACAAGGTCTCCGTTGGTGAACCAGCGGAGGGATCATTACGGAGTTGCAAGACTCACCCAAACCATTGTGAACCGCACCCCTCACCGTTGCTtcggcgggcggcgccccgggcccgacagcggcccgcgggcgcccccagccccgcccccgggggcccgccGGAGGAATACCCGGAAACCCTTTGGCATCGCAAGGCATCTCTGAGTCTCTGTACCGAATTAAGTCAAAACTTTCAACAACGGATCTCTTGGTTCTG
>OTU_1295	AAGTCGTAACAAGGTTTCCGTAGGTGAACCTGCGGAAGGATCATTATTGAATGAATGTAGAGTTGGTTGTCGCTGGCCTCCTTTCTGGCATGTGCACGCCTTCTCTTTCATCCACACACACCTGTGCACCTGTGAGACGGAGAGCTTGCCCTTTCGCGAGGGTGTTTTCTTCGTCTGCCAATACACAAACTCATATAATAATTTGAATGTAATTGATGTAACGCATCTATAAACTAAGTTTCAACAACGGATCTCTTGGCTCTC
>OTU_1296	AAGTCGTAACAAGGTCTCCGTTGGTGAACCAGCGGAGGGATCATTACAGAGTTAATTTAACTCACCAAAACCATGTGAACTTACCTAAGTTGCCTCGGCGGGGAACCTACCCGGGAGCTACTCTATGGTAGCCTACCCGGTACCTACCCTGTAGTTGTAGGCTTTACCCGCCGGCGGACCATCCAAACTCTTGTTTTATTTTGGCACTTCTGAATAACGATACTTAATAAGTTAAAACTTTCAACAACGGATCTCTTGGTTCTG
>OTU_1297	AAGTCGTAACAAGGTTTCCGTAGGTGAACCTGCGGAAGGATCATTATCGATTCAAAAAGGATGTGCTGGCCGCAAGGCATAAGTGCACTCCGAATCCCACATCTCCCTGTGCACTTACTGTGGGCGGAAATGGGGCTTTTGTCCCAATTTTGCTCATGCTTTTTACACACTATTATCACATATCATGAATGTATACAAAGTAGGCTTTGTTTCAAAGCTGAAAATAAAACAATACAACTTTCAACAATGGATCTCTTGGTTCTC
>OTU_1298	AAGTCGTAACAAGGTCTCCGTAGGTGAACCTGCGGAGGGATCATTCACATGATTTACTTTATAAACAAACTGTGAACTTTATTTACTATTCGTGTAGAGATAATTTATTTTCTTTTACACTGTCATTCGATGAACATTAGATAGCTGGCTCGTTTTTTTCATTAAAAACTTTCTCAGCTGATTTGTATTTGTTAGACTAAACATCTATTCAATACAATCAACCAAACATAGAAACAACTCTATGCCCTGGATATCTTGGTTCTC
>OTU_1299	AAGTCGTAACAAGGTCTCCGTTGGTGAACCAGCGGAGGGATCATTATCGAAGTTACTCTTCATACCCATTTGTGAACACTACCCCATTGCCGCGTGTTGCCTCGGCGGTGAGGTCCGCGGGGGGGTGGGCTGCGCTccggcgccgcccccccctcccgggcccccgccggccgcgccTTACTCTTAATTTGCAAAGCGGACTGTACGATCTGATTAATCTTGATAAACAAGTCAAAACTTTCAACAACGGATCTCTTGGTTCTG
>OTU_13	AAGTCGTAACAAGGTTTCCGTAGGTGAACCTGCGGAAGGATCATTAGTGAACGCCCTTCATGGGCTTAAACTATTCCAAACCTCTGTGAACCGTGCCCTTCGGGGCTAATTTTACAAACATGGTGTAATGAACGTCATAACTTTAACAAAACAAAACTTTCAACAACGGATCTCTTGGCTCTCGCATCGATGAAGAACGCAAACAACGGCTCTCTATCTTGGTCATTTAGAGGAAGTAAAAGTCGTAACAAGGTTTCCGTAGGTGAACCTGCGGAAGGATCATTACCGAGTGCAGGTCTGCCCCCGGGCAGGCCTAACCTCCCACCCGTGAATACCTGACCAACGTTGCTTCGGCGGTGCGCCCCCCCGGGGGTAGCCGCCGGAGACCACATTGAACCT…
>OTU_130	AAGTCGTAACAAGGTTTCCGTAGGTGAACCTGCGGAAGGATCATTAACAACGTATCCTAAACGTAAAAAACCCCCCCTGTGAACTTTCATAACCCGAGCTTGCTAGGCCCGCGAAATTCAGCAATCCCTGGTAAATCATTGTTGACCAGCTCTTTGAGTCAGGGATATCCGAACTAGTCGTGTGGATTAAGTTCCGTGAAGCAAGAGCGGTGACCCGGTACCCCCAAGCAATCAATGTTCTGTCAGTGTCGTTGATTGTGTAAGGGTGGCGCAGTAAACGATCGCTGGAGGCCACCACGGCCGGCGACTGGGTCAGCGAGCTCTGCTCCTTAATAACCCCACCTAAGGATTAGCTCGGCGAAAGCTTGAGCACCAAAAACTAATACGACTGTTAACAAT…
>OTU_1300	AAGTCGTAACAAGGTTTCCGTAGGTGAACCTGCGGAAGGATCATTACTGAGTAACTAAGGTTTACAAGCCCCTTACGGGGTGAGTACTCCTTTCTTCTCTTCACCCTTTGTTATTATTACTTAGTTGCTTTGGTAGAGTGCTGTATAGCCTTTACCAAGGGACCATTTTAAACACTTTGTTATCCAATAATTGGTTGTCTTCTGTCTGATTTTTATAACTTTAATAAGTAAATAAAACTTTCAACAACGGATCTCTTGGTTCTG
>OTU_1301	AAGTCGTAACAAGGTTTCCGTAGGTGAACCTGCGGAAGGATCATTACAATTCGGTGGTTTACTGCCGTTTGAAAGGGGTGGAAACTTTTCTGGGTTACCCGGAAAGGAGTACACCTTTTTTCTTAACCCTTGACCTTTTGCGCACTCATGTTTCCTCGGTAGGCTTGCCTGCCGAACGGACAAATCTATAACCTTTTTACTGTTTAATCAGCGTCTGAACAATTATAATAATTACAACTTTCAACAACGGATCTCTTGGTTCTG
>OTU_1302	AAGTCGTAACAAGGTCTCCGTAGGTGAACCTGCGGAGGGATCATTCACATGATTTACTTCAATAAACAAACTGTGAACTTTATATAAAATACTATTCGTGTGTAATTACTTCGGTTATTATCACACTGTCATTCGATGAACATTAGATAGCTGGCTTGTTTTTATTAACTTTCTCAGCTGATTTGTTTTTGTTAGACTAAACATCTATTCAATACAATCAACCAAACATAGAAACAACTCTATGCCCTGGATATCTTGGTTCTC
>OTU_1303	AAGTCGTAACAAGGTCTCCGTAGGTGAACCTGCGGAGGGATCATTCACATGATTACCTTTTCAACAAACTGTGAACTTTTATTATACTATTCGTGTATGAAATAGTCTATCTATTTTTATTACACTGTCATTCGATGAACATTAGATAGCTGGCTTGACTTTTATAGGTCTCTCTCAGCTGATTGCTTGTATTGACTAAACATCTTACAACAATCACCATTTCAAACATAGAAACAACTCTATGCCCTGGATATCTTGGTTCTC
>OTU_1304	AAGTCGTAACAAGGTTTCCGTAGGTGAACCTGCGGAAGGATCATCAACAAATCCCTCTAAATAATCCACAAACACCTTATGTGCTCCTGTTTTTTCTTCTCTTGCAGAAGAGGAAAACAAAAttttttttATCTCACTTTATTATAAACTCCAAAAAATCTTTGTATAAAAAACttttttcattacttttttcaaaaattttttttttGGAAAAAGAATAAATTAATGAAAAAACAACTTTTAACAATGGATCTCTTGGTTCTC
>OTU_1305	AAGTCGTAACAAGGTCTCCGTTGGTGAACCAGCGGAGGGATCATTATCGAAGTTACTCTTCATACCCATTTGTGAACATTACCCCATTGCCGCGCGTTGCCTCGGCGGTGAGGTCCGCGGGGGGTGGGCTGCGCTCCGGCGCTTGCCCCCCTCCCCGGGCCCCCGCCGGCCGCGCCTTACTCTTAATTTGCAAAGCGGACTGTACGTTCTGATTAATCTTGAAAAAACAAGTCAAAACTTTCAACAACGGATCTCTTGGTTCTG
>OTU_1306	AAGTCGTAACAAGGTTTCCGTAGGTGAACCTGCGGAAGGATCATTACCCTTCCGGTCTTCGAGACCGCGTCTTCAACTCGCCGCAGGACCCCACGAAAGTGGCCAGAAATGCGGACGAGGCGAAGTAACCCTTGACTATGAGTACCTTCGTTTCCTCGGCGGGTCCGCCCGCCGATTGGACAACATTCAAACCCTTTGCAGTTGCAATCAGCGTCTGAAAAAACATAATAGTTACAACTTTCAACAACGGATCTCTTGGTTCTG
>OTU_1307	AAAGTCGTAACAAGGTTTCCGTAGGTGAACCTGCGGAAGGATCATTAGTGATATAGAAAATCTATTTTTCTAGTCAACTATTACACCCTTTTGTCAACTATACCATTGTTGCTTCCACTGGACAGACTTCGGTCCTCTGGCTCACTGCAAGGTGAAGCTGGGGAGTGCTGGTGGAAAGAATTTAAACTCGTCTTTAGAAAAACTTGTCTGACAAACTTATTTTTTAATAAAATAAAACTTTCAACAACGGATCTCTAGGCTCTT
>OTU_1308	AAGTCGTAACAAGGTTTTCGTAGGTGAACCTGCGGAAGGATCATTAGTGAAATCATAGAGTGCTCTTTATTGAGGCTCGATCTCCTAATTTCAACACCCCTTATGTGAACTTGAATTAATGCTTGATTGCCTTGAAAAATCTGGTAACGGATTTATTACGGGCTTTCATACATTATAACACACCCTTGAATTTATTAGAGATGAGAATGTAACATAACCTTGAAATTGAAAGAACAACTTTCAGCAACGGATTTCTTGGCTCTC
>OTU_1309	AAGTCGTAACAAGGTTTCCGTAGGTGAACCTGCGGAAGGATCATTATTGAAATTACCGGTGAGGGTTGTAGCTGGCCTCTCGGGGCATGTGCACGCCTGAGCCCTTTCAATCCACACACACCTGTGAACCTAATGTGAGGGCCCGTAAAAAAGGTCCTTATGTCTTATCACCAACCCGAGTCCGATAGAATGTAACATATGTCTTCGCCTTAAAAAGCGTTGATAAAACCTATACAACTTTCAACAACGGATCTCTTGGCTCTC
>OTU_131	AAGTCGTAACAAGGTTTCCGTAGGTGAACCTGCGGAAGGATCATTAACACGTATCCAACGTTAAAACAACCCTGTGAACCTTCAGCGTGTTCTTGCAGGACATCAAAACAGCAATCCCGAGTAAATCAGGCGCTAAAGAATTACAGATTTTGATTTTGGGAAGTTCTGTGTGTACGTGGACGCTGCAATTGAGCGCTAGATAAAGCACCCTGGTACCCTAAGCAATCCCCTGTCTGAAAGCGGCAAGGGATCAATGTTCAGGGTGGCGCAGTCAACGATCGCTGTAGGTCCACACGACCGGCGACCGGGGTGGAGGCGAAAGCCCCTACGTCATCCCTATGTACCCTCCGGGACTTGGCGAAAGCTGACTCCGTCATAAATCGAACAACTGTTAACAAT…
>OTU_1310	AAGTCGTAACAAGGTCTCCGTTGGTGAACCAGCGGAGGGATCATTATAGAGTTTTCTAAACTCCCAAACCCATGTGAACTTACCATTGTTGCCTCGGCAGAGCCTACCCGGTACCTACCCTGGAACTAGCTACCCTGTAGCTACCCAGGAACGGGCTACCCTGTAACGTCCTGCCGGTGGACTTCTAAACTCTTGTTATTTATAGTAATCTGAGCGTCTTATTTTAATAAGTCAAAACTTTCAACAACGGATCTCTTGGTTCTG
>OTU_1311	AAGTCGTAACAAGGTCTCCGTTGGTGAACCAGCGGAGGGATCATTAAAAGAAGCCGAAAGGCTACTTAAAACCATCGTGAACTCGTCCAAGTTGCTTCGGCGGCGCGGAGCCCTCCTCACCGGGGGCGCCGCAGCGCCCGCGCCCCCCCGGGGGTTGCGGGAGCGCCCGCCGGAGGTCACAAACTCTCATGTATTATAGTGGATCTCTGAGTGGCAAACGCAAAAATAAATCAAAACTTTTAACAACGGATCTCTTGGCTCTG
>OTU_1312	AAGTCGTAACAAGGTCTCCGTTGGTGAACCAGCGGAGGGATCATTACAGAGTTTACAACTCACCCAACCATTGTGAACCCTACCTTACCGTTGCTTCGGCGGGAGGCGCCCTCATGCCCCTACAATAGGTGGCCGTAGGGCGCCCCTGGACCCCCCTGCGGGGCGCCCGCCGGAGGATTTCCCAAACCCATTAGCAGTATGTGGCCTATCTAAGTCCTGTACTAAATAAGTCAAAACTTTCAACAACGGATCTCTTGGTTCTG
>OTU_1313	AAGTCGTAACAAGGTCTCCGTTGGTGAACCAGCGGAGGGATCATTAAAGAGTTGCAAAACTCCCTAAACCATCGCGAACGTTACCTTATATCGTTGCTTCGGCGGGGGCGGGGCATTGCCCCTCACTTGCCCCTCGCGGGGTATTTGGCCCCTCGCGGGGCACCCCGCCGGAGGGACGCACCAAAAACTCTTATAGTTGTTTGGCCTCTCTGAGTTACGTTTTTAATAAGTCAAAACTTTCAACAACGGATCTCTTGGTTCTG
>OTU_1314	AAGTCGTAACAAGGTCTCCGTAGGTGAACCTGCGGAGGGATCATTCACATGATTACCTTTTCAACAAACTGTGAACTTTATTTAATCTATTCGTGTGTGTTGTTTGTTCATTCAATTTCAACATCACACTGTCATTCGATGAACATTAGATAGCTGGCTTGATTTTCGAATCTTTCTCAGCTGATTGTTTTTGAATTTAATTACTCGATACAATCAACCAACAAACATAGAAACAACTCTATGCCCTGGATATCTTGGTTCTC
>OTU_1315	AAGTCGTAACAAGGTTTCCGTAGGTGAACCTGCGGAAGGATCATTACCGAGTGTAGGGTTCCTAGCGAGCCCAACCTCCCACCCGTGTTTACTGTACCTTGTTGCTTCGGCGGGCCCGCCGTTTCGACGGCCGCCGGGGAGGCCTCGCGCCCCCGGGCCCGCGCCCGCCGAAGACCCCAACATGAACTCTGTTCTGAAAGTATGCAGTCTGAGTTGATTATCATAATCAGTTAAAACTTTCAACAACGGATCTCTTGGTTCCG
>OTU_1316	AAGTCGTAACAAGGTTTCCGTAGGTGAACCTGCGGAAGGATCATTCACAACGTATCCTAAACGTAAAAAACCCCCCCTGTGAACTTTCTGTCAGTGTCGTTGATTGTGTAAGGGTGGCGCAGTAAACGATCGCTGGAGGCCACCACGGCCGGCGACTGGGTCAGCGAGCTCTGCTCCTTAATAACCCCACCTAAGGATTAGCTCGGCGAAAGCTTGAGCACCAAAAACTAATACGACTGTTAACAATGGATATCTTGGTTCTC
>OTU_1317	AAGTCGTAACAAGGTTTCCGTAGGTGAACCTGCGGAAGGATCATTATCGAATTACCGGCGAGGGTTGTAGCTGGCCTTTCGGGGCACGTGCACGCCCGAGCCCTTAATCCACACACACTTGTGAACCTAATGTAAGGGCCCGTAACGGGGCCCCTACGTCTCATTTCACCGACGCATGTCCAATAGAATGTAAATCAAATATCTTCGCCTTAAAAAGCGTTGGTAAACTTATACAACTTTCAACAACGGATCTCTTGGCTCCC
>OTU_1318	AAGTCGTAACAAGGTCTCCGTTGGTGAACCAGCGGAGGGATCATTACAGAGTTGCAAAACTCCCAAACCATCGTGAACGTTACCTATATCGTTGCTTCGGCGGGCGGCGCGCCCGGAGGGGTCCTAACCGGCCCCCCCGCGGTCCGCCCTCGGCCCCACCGTGGGGCCCGCCGGAGGTCTACCAAACTCTGAATTTATATGGCCTCTCTGAGTCTTCTGTACTGAATAAGTCAAAACTTTCAACAACGGATCTCTTGGTTCTG
>OTU_1319	AAGTCGTAACAAGGTTTCCGTAGGTGAACCTGCGGAAGGATCATTAACAAAACACCTTGGTAAGCGGCGCAAGCCGTGATGCCAAAATCAACCTTTGTGAATCGGGCAGCGTGTGCAAGCACGCGGCTTAGTCGGGGTGGGCTACAGTGTGTGTGGTGCAAGAGCGCAAGCGACGGCCTGCACATGCTTTCTGTAACGTCTTATATTATGCTGTCGAAAGACAACAACTAATACAACTTTTAACAATGGATCTCTAGGCTCTT
>OTU_132	AAGTCGTAACAAGGTTTCCGTAGGTGAACCTGCGGAGGATCATTAACAACGTATCCTAAACGTAAAAAACCCCCTGTGAACCTTCATAACCCGAGCTTGCTAGGCCCGCGAAATTCAGCAATCCCTGGTAAATCATTGTTGACCAGCTCTTTGAGTCAGGGATATCCGAACTAGTCGTGTGGATTAAGTTCCGTGAAGCAAGAGCGGTGAGGCAAGTGACCCGGTACCCCCAAGCAATCAATGTTCTGTCAGTGTCGTTGTCAGGGTGGCGCAGTAAACGATCGCTGGAGGCCACCACGGCCGGCGACTGGGTCAGCGAGCTCTGCTCCTTAATAACCCCACCTAAGGATTAGCTCGGCGAAAGCTTGAGCACCAAAAACTCATACGACTGTTAACAAT…
>OTU_1320	AAGTCGTAACAAGGTCTCCGTAGGTGAACCTGCGGAGGGATCATTCACATGATTTACTTTTAACAAACTGTGAACTTTATATAAAATACTATTCGTGTGTAATTACTTCGGTTATTATCACACTGTCATTCGATGAACATTAGATAGCTGGCTCGTTTTTTATTAAACTTTCTCAGCTGATTTGTTTTTGTTAGACTAAACATCTATTCAATACAATCAACCAAACATAGAAACAACTCTATGCCCTGGATATCTTGGTTCTC
>OTU_1321	AAGTCGTAACAAGGTTTCCGTAGGTGAACCTGCGGAAGGATCATTATCGAGTTAGGGTCTCCGGCCCGACCTCCAACCCTGTGTCTACTTAACCACGTTGCTTCGGCGGGCCCGCCCCTCTGGGGGGGCCGCCGGGGGTCGACTTTCGACCTCTGGCCCGCGTCCGCCGGTGGCCTACACACAAACTCTGATTACAAACCGTGTCGTCTGAGTTCAAACAAAAATTAAAACAAAAACTTTCAACAACGGATCTCTTGGTTCTG
>OTU_1322	AAGTCGTAACAAGGTTTCCGTAGGTGAACCTGCGGAAGGATCATTACCGAGTGAGGGTCTTCGGGCCCGACCTCCCAACCCGGTGTCTATATACCTCAGTTGCTTCGGTGGGCCGGACGCGACCAACTGGTCGTGACCCCCCAGTCTTCGGGCTGGAGCGTGCCCGCCGATGGCCTCCCACAAACTCTTGGTATCCAACCTGGTCGTCTGAATTGGATTTTCAATCAAAAACAAAACTTTCAACAACGGATCTCTTGGTTCTG
>OTU_1323	AAGTCGTAACAAGGTTTCCGTAGGTGAACCTGCGGAAGGATCATTAACGAATTTATTGGAGTTGTGCTGGTTCTTACAAGTGCACGCTCCTTCAATTCCATTCACACCCAATGTGCACTCTAAGAGACGTATCTCCCCCGTTTACGTGCCTTCAATGGCTTGGGATTTCGTCTGTTTAACACACACTTTTTGTAATAGAATGTCATTTGGCTTAAATGCCTAAAACTTTAAAATAACTTTCAACAACGGATCTCTTGGTTCTC
>OTU_1324	AAGTCGTAACAAGGTTTCCGTAGGTGAACCTGCGGAAGGATCATTCACAATAAGAGTGTTTATGGCACTCTTTCAAAAATCCATACCCACCTTGTGTGCAATGTAAAAGAGTTTGGCGAGAAGGAAGGGGGTTTTTATTGGCCTCCTTTCAGCGAACCAGACTTTTTCATCATATATACCTTTCTATAAGTTCCTATTGTCTGAAGTGATATGAATTAACATAATTCTAAATACAACTTTCAACAACGGATCTCTTGGCTCTC
>OTU_1325	AAGTCGTAACAAGGTCTCCGTTGGTGAACCAGCGGAGGGATCATTACCAGAGTTTACAACTCCCAAACCCAAATGTGAACATACCTACTGTTGCTTCGGCGTGCTCGCCCCGGCGTCCGGCTGGCCCTGTGCCGGCCGCGACCCGGAGCCAGGCGACCGCCGGAGAAAAAAACCAAAACCCTTTGTATTATCAGCATCTTCTGAATCCGCCGCAAGGCAAAACAAATGAATCAAAACTTTCAACAACGGATCTCTTGGTTCTG
>OTU_1326	AAGTCGTAACAAGGTAACCGTAGGTGAACCTGCGGTTGGATCATTACTGATTTTTGTTTCTATGGAGTTGATACCTTTACGGAGTCCTCCATAGAGACTAACTACCCCTTGTGCACCAAATGTTTTTTGGGTCACATTAGGTAGGGTAGAGTAAGCGTAAGCATACGCTATCCTACTGGTGGCCCAGTTGTAAAGACCATACCAATTGTCTGAAATCTCTATGTAAATAGAAACAACTTTTGACAACGGATCTCTTGGCTCTC
>OTU_1327	AAGTCGTAACAAGGTTTCCGTAGGTGAACCTGCGGAAGGATCATTAACGAGTTTGACATGGGGTTGATGCTGGCCTTCCGAGGCATGTGCTCGCCCCTGCTCATCCATCTACACCTGTGCACCTTTTGTGGCTAGGCCTTACGGTTTGTGCTTTGCATGAACTGGAAGCCAGCTGCGTTTTTTATACACACACTTCAGTTCAGAATGTACTATTGCTATAAACGCATTAAATACAACTTTCAACAACGGATCTCTTGGCTCTC
>OTU_1328	AAGTCGTAACAAGGTCTCCGTTGGTGAACCAGCGGAGGGATCATTAAAGAGTTGCGAAACTCCCTAAAACCATCGTGAACCTACCTATCTCGTTGCCTCGGCGGGCGGCTCCGGCACCCGGAGACGTCACGCCCGCTTCCCCCTCCCCCGGGGGGCGCGGGGCGCCCGCCGTAGGCACCCGACACCCTGTATTCAGTGGATATCTCTGAGTGATGCTTCTAGCAAATAAGTCAAAACTTTCAACAACGGATCTCTTGGTTCTG
>OTU_1329	AAGTCGTAACAAGGTCTCCGTTGGTGAACCAGCGGAGGGATCATTACCGAAGTTACCCTTCAAAACCCATTGTGAACCTTACCTCTTGCCGCGCGTTGCCTCGGCGGGGAGGCGGGGTCTGGGTCGGCgcgcccctcgccgggccgccgtccccgtccccgtccccgccggccgcgccAAACTCTGAATTTGAAAAAGCGTACTGCACGTTCTGATTCAAAACAAAACAAGTCAAAACTTTTAACAACGGATCTCTTGGTTCT
>OTU_133	AAGTCGTAACAAGGTTTCCGTAGGTGAACCTGCGGAAGGATCATTAACAACGTATCCTAAACGTAAAAAACCCCCCCTGTGAACTTTCATAACCCGAGCTTGCTAGGCCCGCGAAATTCAGCAATCCCTGGTAAATCATTGTTGACCAGCTCTTTGAGTCAGGGATATCCGAACTAGTCGTGTGGATTAAGTTCCGTGAAGCAAGAGCGGTGAGGCAAGTGACCCGGTACCCCCAAGCAATCAATGTTCTGTCAGTGTCGTTGATTGTGTAAGGGTGGCGCAGTAAACGATCGCTGGAGGCCACCACGGCCGGCGACTGGGTCAGCGAGCTCTGCTCCTTAATAACCCCACCTAAGGATTAGCTCGGCGAAAGCTTGAGCACATACGACTGTTAACAAT…
>OTU_1330	AAAGTCGTAACAAGGTTTCCGTAGGTGAACCTGCGGAAGGATCATTACCGAGTGCGGGTCCTCGTGGCCCAACCTCCCACCCGTGACTATTGTACCTTGTTGCTTCGGCGGGCCCGCCAGCTTGCTGGCCGCCGGGGGGCGTCTCGCCCCCGGGCCCGTGCCCGCCGGAGACCCCAACATGAACCCTGTTCTGAAAGCTTGCAGTCTGAGTTGTGATTCTTTGCAATCAGTTAAAACTTTCAACAATGGATCTCTTGGTTCCG
>OTU_1331	AAGTCGTAACAAGGTCTCCGTTGGTGAACCAGCGGAGGGATCATTACAGAGTTACACAACTCACCAAACCATTGTGAACCGTACCTTTACCGTTGCTTCGGCGGGAGGCGCCCCGTGCCCCTGTGGCGCGCCGGGCGTCCCCTGGCCCCCTCGCGGGGCGCCCGCCGGAGGAATACCCAAAACCCTTTGCAGCACATGGCCTCTCTGAGTCTTCTGTACTGAATAAGTCAAAACTTTCAACAACGGATCTCTTGGTTCTGGCA
>OTU_1332	AAGTCGTAACAAGGTTTCCGTAGGTGAACCTGCGGAAGGATCATTAACAAATCATTGACTTGCGGGCTTCGGCCTAGCAAGACATAAACCCGAACCTGTGCAGTGGTAATACCTGCCAGGCAAGGTGTAGGCTTTCGGGCCTGCGGTGAAGTGGACCCCTCTCTGGGGTCTGCCGATCCACATAGACGCTTGTTTTTGTTTGACAGTTTACAGTTGACACTTTTAAAAATGACAACTTTTAACAATGGATCTCTTGGCTCTT
>OTU_1333	AAGTCGTAACAAGGTCTCCGTTGGTGAACCAGCGGAGGGATCATTATCGAGTTACAAAACTCCCAAACCTTTGTGAACATACCATCGTTGCTTCGGCGGGACTCGCCCCGGGGCGCCCCGGCGGCCGCGTCTTCTCGCGCCGCCGCTGCCCCGGAACCAGGCGCCCGCCGAGGGACCCAAACTCTTGTCTTTACAGTGGGATATTCTGAGTTATTATACAAATAAGCAATCAAAACTTTCAGCAACGGATCTCTTGGCTCTG
>OTU_1334	AAGTCGTAACAAGGTTTCCGTAGGTGAACCTGCGGAAGGATCATTAAATGAAAAATCTGTATTCTGTTGAATATATCGGATTCTTAAACCCCACCTGTGTACCGTACCCGTTGCTTCCGCTGGGCAGTGATATCCGCCGTCACGGCTGGATGGACAAGTCCCGGCGAAAGGTCCGCATTAAACCTTTGCATTTCCATTGCCGCCTGTCTGAACCTTTTTATAACAAATGTTAAAACTTTCAACAACGGATCTCTTGGTTCTC
>OTU_1335	AAGTCGTAACAAGGTCTCCGTTGGTGAACCAGCGGAGGGATCATTACGAAAGGAGTATTCCGTACTCTTCAACCCTTTGTGAACATACCATCGTCAGTTGCTTCGGCGGGAGGCCCCTGGGAGGGGCCCCGGGGCCCGGTCCTGAGCCGGGCTCCCGCCGGAGGAGCGCAGAAAACACAAACTCTTGTTGTACCCCAGTGGCACGTCCGAGTCAAAACAAATAAACAAGTTAAAACTTTCAACAACGGATCTCTTGGTTCTG
>OTU_1336	AAGTCGTAACAAGGTTTCCGTAGGTGAACCTGCGGAAGGATCATTACCGAGTGAGGGCCCTCTGGGTCCAACCTCCCACCCGTGTCTATCGTACCTTGTTGCTTCGGCGGGCCCGCCGTTTCGACGGCCGCCGGGGAGGCCTCGCGCCCCCGGGCCCGCGCCCGCCGAAGACCCCAACATGAACTCTGTTCTGAAAGTATGCAGTCTGAGTTGATTGTATCGCAATCAGTTAAAACTTTCAACAATGGATCTCTTGGTTCCG
>OTU_1337	AAGTCGTAACAAGGTTTCCGTAGGTGAACCTGCGGAAGGATCATTACCTGGCCTTGGGCCGCTCGGGGGAGCCAGTCGCTCGCGACGACGCTGCCTTGGGCGCTTAGCCCTTGACTATCACCTTGACTACGTGCACCCTTTGTTGTTTCCTCGGCAGGTCCTCTGCCGCCAGGAACCCCCCAAACCCCTTTGCAACAGCATCTAAACTTCTGAAAACAAACCAAATCATTTACAACTTTTAACAATGGATCTCTTGGTTCTG
>OTU_1338	AAGTCGTAACAAGGTCTCCGTTGGTGAACCAGCGGAGGGATCATTACAGGGTCTGACGACTGCCCAAACCAAACCGTGAACTATTTTCTGCTCAAAAATGCTTTGGCAGGCCGCTCGCTGGGGGAGCCCCGGACTGCCGAGAGGCGGTTGGCCTGCCGAAGGCATGCAAATTTAAACTCACTGAATAACTTTCTGAGAAAATATCATCTCCCTTCGGGAGTAAAAATTATCACAACTCATAACAATGGATCTCTTGGCTCTG
>OTU_1339	AAGTCGTAACAAGGTTTCCGTAGGTGAACCTGCGGAAGGATCATTACCGAGTGAGGGTTCCTTGCGAGCCCAACCTCCCACCCGTGTTTAACTATACCGTGTTGCTTCGGCGGGCCCACTGGGGCCCGTTCCTGGTCGCCTGGGGGCGTGAAACCCCCCGGGCCCGTGCCCGCCGGAGACCCCTTGAACCCTGAGTGAATCGAGTGTCGTCTGAGTTTGAGTTAAATCATTAAAACTTTCAACAACGGATCTCTTGGTTCCG
>OTU_134	AAGTCGTAACAAGGTTTCCGTAGGTGAACCTGCGGAAGGATCATTAACAACGTATCCTAAACGTAAAAAACCCCCCCTGTGAACTTTCATAACCCGAGCTTGCTAGGCCCGCGAAATTCAGCAATCCCTGGTAAATCATTGTTGACCAGCTCTTTGAGTCAGGGATATCCGAACTAGTCGTGTGGATTAAGTTCCGTGAAGCAAGAGCGGTGAGGCAAGTGACCCGGTACCCCCAAGCAATCAATGTTCTGTCAGTGTCGTTGATTGTGCGCAGTAAACGATCGCTGGAGGCCACCACGGCCGGCGACTGGGTCAGCGAGCTCTGCTCCTTAATAACCCCACCTAAGGATTAGCTCGGCGAAAGCTTGAGCACCAAAAACTAATACGACTGTTAACAAT…
>OTU_1340	AAGTCGTAACAAGGTTTCCGTAGGTGAACCTGCGGAAGGATCATTATTGAGTAACTGGGGGTAGCTTTGGTATGTAATGTACCAAACTACCCTTACACTCTTCACCCTTTGTTATTTTTTCTCAGTTGCTTTGGCAGAGCCTTGTGTTCTGCCAGAGGATACATATCAAACCATTTTGTTAACCAATAATTGGGGTACTTGTAGTCTGATTTAGTTACTTTAATAGTATACAAAACTTTCAACAACGGATCTCTTGGTTCTG
>OTU_1341	AAGTCGTAACAAGGTCTCCGTTGGTGAACCAGCGGAGGGATCATTAGCGAGTCTAGCACTCCAAAACCCGTGTGAACATGCCCCGACGGCGCTGTTGTTTCGGCGGGCGGGGCGGGTCGCCTCAGGCGGTCTCGCCCCCCAGGGTCCACTGCGGATCGCCCGCCGACGGCGCCAAAAACTCTTCTGTATCCACAGCGGTCTTCTCTCTGAGTGGCAAAGAAAAAACAAGTAAAAACTTTCAACAACGGATCTCTTGGCTCTG
>OTU_1342	AAGTCGTAACAAGGTCTCCGTTGGTGAACCAGCGGAGGGATCATTACAGAGTTGCAAAACTCCCTAAACCATCGCGAACGTTACCTTGAACCGTTGCTTCGGCGGGCGGCGCCCCTTTTCGCGGGGCGCCCCTGGGGCCCGTTTCACCGCGGGCTGCCCGCCGGAGGTATACAACCAAAAACTCTTGATATTTCTTTGGCCACTCTGAGTCTTCTGTTACTGAATTAAGTCAAAACTTTCAACAACGGATCTCTTGGTTCTG
>OTU_1343	AAGTCGTAACAAGGTTTCCGTAGGTGAACCTGCGGAAGGATCATTACTTGGCCTTGGGCCGCCCCAGGGAGATGGTCGCTCGCGACGATGTCCCCGGTGGTGCTTAGCCCTTGACTCCCACCTTGACTATGCGTACCTATTGTCGTTTCTTCGGCGGGGCCTCCCGCCGACAGGAACTCCCAAACCCTCTTGCATGTAGCATCAACACCTCTGACAACAACCAAATCATTTACAACTTTTAACAATGGATCTCTTGGTTCTG
>OTU_1344	AAGTCGTAACAAGGTTTCCGTAGGTGAACCTGCGGAAGGATCATTACCTTTCCTGCCTTTAAGTAGGCTTGTCGGGGGGCTTGTACTCGTTGCAATTTACGTTGTAGCGCCTACAGCCCCTGACTGAACCCGTGTCTTTGCGTACTACTTGTTTCCTTGGTGGGCTTGCCTACCAAACGGACCACATTAAACCCTTGTAATTGCAATCAGCGTCAGAAAACAATAATAATTACAACTTTCAACAACGGATCTCTTGGCTCTG
>OTU_1346	AAGTCGTAACAAGGTTTCCGTAGGTGAACCTGCGGAAGGATCATTACCGAGTGCGGCCCCCCCGGGGGCCTCATCTCCCACCCTTGTCTCCCATATCCACCCTGTTGCTTTGGCGGGCCCACCGGGCATCCCGGTCGCCGGGGGGCGTTGCGCCCCCGGGCCCGCGCCCGCCAGAGCGCCTGATGAACCCTCATGAAGACGGACTGTCTGAGTGTGTTGGCAAAAATAATCAAAACTTTCAACAATGGATCTCTTGGTTCCG
>OTU_1347	AAGTCGTAACAAGGTTTCCGTAGGTGAACCTGCGGAAGGATCATTACACTCAGTAGTTTACTACTGTTAAGGAGGCTGTTAGTCTGTATAGCTTAATCGCTGATGAGCAGCAGGCCTTCTTTCCACACCCTTGTCTTTTGCGTACCCATGTTTCCTCGGCAGGCTTGCCTGCCGATTGGACAATCTATAACCTTTTTAATTTTTATTCAGCGTCTGAAAAACTTAATAATTACAACTTTCAACAACGGATCTCTTGGTTCTG
>OTU_1348	AAGTCGTAACAAGGTCTCCGTAGGTGAACCTGCGGAGGGATCATTACACAAAAAATATGAAGGCTGCACGCGGCTGCGTCTCCGGACCAGTTGCTGAGGCTGAACTATTTTTCACCCATGTCTTTTGCGCACTTGTTGTTTCCTGGGCGGGTTCGCTCGCCACCAGGACCACACCATAAACCTTTTTTATGCAGTTGCAATCAGCGTCAGTATAACAAATGTAAATCATTTACAACTTTCAACAACGGATCTCTTGGTTCTG
>OTU_1349	AAGTCGTAACAAGGTTTCCGTAGGTGAACCTGCGGAAGGATCATTACCGAGTGCGGGTCTTTATGGCCCAACCTCCCACCCGTGACTATTGTACCTTGTTGCTTCGGCGGGCCCGCCAGCGTTGCTGGCCGCCGGGGGGCGACTCGCCCCCGGGCCCGTGCCCGCCGGAGACCCCAACATGAACCCTGTTCTGAAAGCTTGCAGTCTGAGTGTGATTCTTTGCAATCAGTTAAAACTTTCAACAACGGATCTCTTGGTTCTG
>OTU_135	AAGTCGTAACAAGGTTTCCGTAGGTGAACCTGCGGAAGGATCATTAATACGCTTTTGTTTGTAACAAAACAAAACGTTTTAAACTCCAAAAGAAATAGTGGAAATATAACTTCCGGATGCAAATGTTGGGGAACTGAGTAAAATCGGTTCTTTGGAAAGGGACTTCAAGCAATTGACACTTCAGAGTAGAGCAGTGAGGTGAAATTCTCTTTTACGAGAGAGTTTGGTTCTGAAAAACATTTGTATCCGGTTATCAACATCTGTTCTACAAATTCTATCAAACAATAAACCCCATGTACAACAACTTGAACTAAACAttttttttGTTTGTCTGCTCGCACTTTGTGTGACAAGATACTACAAAGAAAAAACCTGAACTTAAGAACAACTCTTAACAAC…
>OTU_1350	AAGTCGTAACAAGGTCTCCGTTGGTGAACCAGCGGAGGGATCATTACCGAAGTTACCCTTCAAAACCCTTTGTGAACGTTACCTCTTGCCGCGTTGCCTCGGCGGGAGGCGTCgggggggggACCGTCGCCGCTCACGCGGAGGCGCCCCCCCTCGCCGTCCCCGCCGGCAGCGCCAAAACTCTATTTGCACAGCGGACTGTATGTTCTGATTTACaaaaaaaaaCAAGTTAAAACTTTCAACAACGGATCTCTTGGTTCTG
>OTU_1351	AAGTCGTAACAAGGTAACCGTAGGTGAACCTGCGGTTGGATCATTAAAAAAGTTGGTTTCTAACCATCAACCTTGTGTGCACTGTATCTGTCTCTGGTCAACTGCGGTTGAGGACTTTATTGTTCTCCACGGGTTGGCCGAAGGGGGTCAACATTGATTTATCATGTTGATCCTGTTAACAAACCTTATGAATTTTTATTTGTCTGATACATTTGTTTAACAAATGAAAAAACAACTTTTGACAACGGATCTCTTGGCTCTC
>OTU_1352	AAGTCGTAACAAGGTTTCCGTAGGTGAACCTGCGGAAGGATCATTACCGTGTTCTGGGTCCCCTCGGGGGCCCGACACCCCACCCTTTGTAGTTACATGACTATCGTTGCCTCGGCGGGACGGCCCCCTCACGGGGGCCGCCGGGTCCCAAAGCGCCCGGAGAGTCTCCCGCCGGAGGACCACAAACACTAGCCTTTGAACCAGTACGTCAGAGTAAGAATTTAATAATTCAAAACTTTCAACAACGGATCTCTTGGTTCTG
>OTU_1353	AAGTCGTAACAAGGTTTCCGTAGGTGAACCTGCGGAAGGATCATTACCGAGTGCGGGTCCTTTGGGCCCAACCTCCCATCCGTGTCTATTGTACCCTGTTGCTTCGGCGGGCCCGCCGCTTGTCGGCCGCCGGGGGGGCGCCTCTGCCCCCCGGGCCCGTGCCCGCCGGAGACACCACGAACTCTGTCTGATCTAGTGAAGTCTGAGTTGATTGTATCGCAATCAGTTAAAACTTTCAACAATGGATCTCTTGGTTCCGGCA
>OTU_1355	AAGTCGTAACAAGGTCTCCGTTGGTGAACCAGCGGAGGGATCATTACAGAGTTTACACAACTCGCTAAACCATTGTGAACCCTACCTCATTGTTGCTTCGGCGGGAGGCGCCCCGATGCCCCTGTAATGGGTGGCCGTGGTGCGCCCTTGGACCCCCCGCGGGCGCCCGCCGAAGGAGTCCCAAAACCCTTTGACAGCACATGGCCTCTCTGAGTCTGTACCGAATAAGTCAAAACTTTCAACAACGGATCTCTTGGTTCTG
>OTU_1357	AAGTCGTAACAAGGTTTCCGTAGGTGAACCTGCGGAAGGATCATTACCTGGCCTTGGGCCGCTCGCGGGGGCTCGTCGCTTGCGACGGTGCTCCCGGGGGTGCTTAGCCCTTGACTCTTACCTTGATTATGCGCACCTTTTGTTGTTCCCTCGGCAGGTCTCCTGCCGACAGGAACCCCATAAACCCTTCATGTATAAGCATCAAACCTCTGAAAACAAATTTAATTATTTACAACTTTCAACAATGGATCTCTTGGTTCTG
>OTU_1358	AAGTCGTAACAAGGTCTCCGTTGGTGAACCAGCGGAGGGATCATTACCGAAGTTACTCTTCAAAACCCATTGTGAACCTTACCTCTTGCCGCGCGTTGCCTCGGCGGGGAGGCGGGGTCTGGGTCGGCGCGCCCCTCACCGGGCCGCCGTCCCCGTCCCCGTCCCCGCCGGCCGCGCCAAACTCTAAATTTACAGCGGACTGTATGTTCTGATTTACaaaaaaaaCAAGTTAAAACTTTCAACAACGGATCTCTTGGTTCTG
>OTU_136	AAGTCGTAACAAGGTTTCCGTAGGTGAACCTGCGGAAGGATCATTAACAACGTATCCTAAACGTAAAAAACCCCCCCTGTGAACTTTCATAACCCGAGCTTGCTAGGCCCGCGAAATTCAGCAATCCCTGGTAAATCATTGTTGACCAGCTCAACTTTGAGTCAGGGATATCCGAACTAGTCGTGTGGATTAAGTTCCGTGAAGCAAGAGCGGTGAGGCAAGTGACCCGGTACCCCCAAGCAATCAATGTTCTGTCAGTGTCGTTGATTGTGTAAGGGTGGCGCAGTAAACGATCGCTGGAGGCCACCACGGCCAGCGAGCTCTGCTCCTTAATAACCCCACCTAAGGATTAGCTCGGCGAAAGCTTGAGCACCAAAAACTAATACGACTGTTAACAAT…
>OTU_1360	AAGTCGTAACAAGGTCTCCGTAGGTGAACCTGCGGAGGGATCATTCACATGATTTACTTTAATAAACAAACTGTGAACTTTATATACTATTCGTGTAGAGATAAATTTATTTTCTTTTACACTGTCATTCGATGAACATTAGATAGCTGGCTTGTTTTTCATTAAACTTTCTCAGCTGATTTGTTTTTGTTAGACTAAACATCTATTCAATACAATCAACCAAACATAGAAACAACTCTATGCCCTGGATATCTTGGTTCTC
>OTU_1361	AAGTCGTAACAAGGTAACCGTAGGTGAACCTGCGGTTGGATCATTAATAAATTTGAAGCTCTGCTTCACAAACACCGTGTGCACTGTTTACTGTCTCTGGCAGGATCAGGGATGCAATGTCCCCCCTGTCAAAGGAGTGGGTCGCCCTTTGGGCGACTCGCTCCTTGTTGAAAAACTCATTGTCTGTCTTTTGTCTGAACTTTTCTTCACATTCGTGTGAGAAATTGAAAACAACTTTTGGCAACGGATCTCTTGGCTCTC
>OTU_1362	AAGTCGTAACAAGGTTTCCGTAGGTGAACCTGCGGAAGGATCATTATTGAATGAACTTAGAGTCGGTTGTCGCTGGCTGTCTTTGGCAGCATGTGCACGCCTTCTCTTTTCATCCACACACCCCTGTGCACTTGTGAGACTGGAGGCCGTAAAAAAGCCTTCAGTCTGCTAAATTCATATACAAACTCATTTAATTGAACTGAATGTACTTGATGTAACGCATCATTAAACTAAGTTTCAACAACGGATCTCTTGGCTCTC
>OTU_1363	AAGTCGTAACAAGGTCTCCGTTGGTGAACCAGCGGAGGGATCATTAAAAGAAGCCGAAAGGCTACTTAAAACCATCGCGAACACGTCCAAGTTGCTTCGGCGGCGCGGGGCCCCTTCCCGGGGCGCCGCTGCCCTCCGCCCCCGGGTCTCCGGGAGGTGCGGGGCGCCCGCCGGAGGTACGAAACTCTTATGTATCACAGTGGCATCTCTGAGTGAAAAACAAATAAGTTAAAACTTTCAACAACGGATCTCTTGGTTCTG
>OTU_1364	AAGTCGTAACAAGGTTTCCGTAGGTGAACCTGCGGAAGGATCATTACCGAGTGAGGGTCCTCGTGGCCCAACCTCCCACCCGTGACTACTGTACCACTGTTGCTTCGGCGGGCCCGCCAGCGTCCGCTGGCCGCCGGGGGGCTTCTGCCCCCGGGCCCGTGCCCGCCGGAGACCCCAACACGAACACTGTTTCTGAAAGCCTGTATGAATCCGATTCTTTGTAATCAGTTAAAACTTTCAACAATGGATCTCTTGGTTCCG
>OTU_1365	AAGTCGTAACAAGGTTTCCGTAGGTGAACCTGCGGAAGGATCATTATTGAGTTATTGAGGGTAGTTTCGGTACGCAAGTGCTGAGCTACTCTTACACTCTTCACCCTTTGTTATTTTTTCTTAGTTGCTTTGGCAGTGCCTTGTGCTCTGCCAGAGGATACATACCAAACCATTTTGTTAACCAATAATTGGGATACTTGTAGTCTGATTTAGTTACTTTAATAGTATACAAAACTTTCAACAACGGATCTCTTGGTTCTG
>OTU_1366	AAGTCGTAACAAGGTTTCCGTAGGTGAACCTGCGGAAGGATCATTACCGAGTGCAGGTCTGCCCCCGGGCAGGCCTAACCTCCCACCCGTGTTTACTGTACCTTAGTTGCTTCGGCGGGCCCGCCATTCATGGCCGCCGGGGGCTCTCAGCCCCGGGCCCGCGCCCGCCGGAGACACCACGAACTCTGTCTGATCTAGTGAAGTCTGAGTTGATTGTATCGCAATCAGTTAAAACTTTCAACAATGGATCTCTTGGTTCCG
>OTU_1367	AAGTCGTAACAAGGTTTCCGTAGGTGAACCTGCGGAAGGATCATTAAAGAGTTAGGGTCTCTCAGGCCCGACCTCCCAACCCTTTGTTTACTGAACCATTGTTGCTTCGGTGGGTCCGTCTCGCGACCGCCGGGGGGGACCCCTCCCTGGCCCGCACCCGCCGATAGCCCAACCTTTAAAATCCTTTATGAATCGTGTCTTATGTCTAAATCATGATAATAAATCAAATTAAAACTTTCAACAACGGATCTCTTGGTTCTG
>OTU_1368	AAGTCGTAACAAGGTTTCCGTAGGTGAACCTGCGGAAGGATCATTATTGAGTAACTGAGGGTGGCTTTAGTATGTATGTACTAAACTGCCCTTACACTCTTCACCCTTTGTTATTTTTTCTCAGTTGCTTTGGCAGAGCCTTGTGTTCTGCCAGAGGATACATACCAAACCATTTTGTTAACCAATAATTGGGATACTTGTAGTCTGATTTAGTTACTTTAATAGTATACAAAACTTTCAACAACGGATCTCTTGGTTCTG
>OTU_1369	AAGTCGTAACAAGGTTTCCGTAGGTGAACCTGCGGAAGGATCATTATCGAATCCTTAGGATGTTGCTGGCCTCTAGGGGCACTGTGCACTCCGCCTTTTCATCTCACCTGTGCACTTATTGTAGGCCGGACTTGTCATGAGTCTGTGTCTATGTTTTTAACACACACCTTTATAAAAAGTCTATTGAATGTCTTTGTTAAGTAGACCTTTACCGGTCGAAAAATTAAAATACAACTTTCAACAATGGATCTCTTGGTTCTC
>OTU_137	AAGTCGTAACAAGGTCTCCGTAGGTGAACCTGCGGAGGGATCATTAACACTATTTGGCTGTGTTGGTTCCAGCAATGGTTCTACACACAGTTCAAATTCTATACACACTGTTGAACTCGGTTACCTTGCGTAGCCAATCCTCCCTTTGAATTGGAAATGTTGATGAACGGTTTGTAGTGGGATGACGCAAGTCATCGACTATTCATTGACTATCAAAGCTTGACTTTGAAATTTCCTTTTCTTAGGCAATTCATACTAACGTTTCCTCCACTATAGAAATGAACTCATTTCACTCCTTCGTACTCCAATTGACTGATCAAAGAATGCTACGCGAAACCCGCAAGGGAATCAAATAGCAGGACTAAGATAATTCTTAAACTAAGCACAACTCTTAGCAAC…
>OTU_1370	AAGTCGTAACAAGGTTTCCGTAGGTGAACCTGCGGAAGGATCATTACCGAGTGAGGGCCCCTCGCGGCCCAACCTCCCACCCTTGTCTCCAACACCTGTTGCTTCGGCGGGCCCGCCGCTTGTCGGCCGCCGGGGGGGCGCCTCTGCCCCCCGGGCCCGTGCCCGCCGGAGACCCCAACACGAACACTGTCTGAAAGCGTGCAGTCTGAGTTGATTGAATGCAATCAGTTAAAACTTTCAACAATGGATCTCTTGGTTCCG
>OTU_1371	AAGTCGTAACAAGGTTTCCGTAGGTGAACCTGCGGAAGGATCATTACCGAGTGTCGGGCCCCCCGGGGCCCAGCCTCCCACCCGTGTCTACCGTCCCTTGTTGCTTCGGCGGGCCCGCCCTTCAGGGTGGCCCGGCGGCCCTCGTGCCCCCGGGCTCCGCGCCCGCCGGAGACGTCCGCATGAACCCTTTGTGAAGGTTGCCGTCTGAGTGGATATTTCCAATCATAATTAAAACTTTCAACAACGGATCTCTTGGTTCCG
>OTU_1372	AAGTCGTAACAAGGTCTCCGTTGGTGAACCAGCGGAGGGATCATTACCGAAGTTACTCTTCATACCCTTTTGTGAACACTACCCCATTGCCGCGCGTTGCCTCGGCGGGGGAGGTCCGGGGGAGGGTTGCGCTCCGGCGCCTCCCCACCCTGGGCCCCCCGCCGGCCGCGCCGAACTCTTCATTTGCAAAGCGGACTGTACGTTCTGATTATATCTTGAAAAAACAAGTCAAAACTTTCAACAACGGATCTCTTGGTTCTG
>OTU_1373	AAGTCGTAACAAGGTCTCCGTTGGTGAACCAGCGGAGGGATCATTACAGAGTTGCAAAACTCCCCAAACCATCGTGAACCTTTACCGCTAAACAGTTGCTTCGGCGGGTGGGCCCGCGGGTGCGCGCGCGCAAGCCGCGCCCCCGGGGGCCGCCGAGCCCGCCGGAGGAATCCAAAAAACCATCGCTTTCAGTACCGGCCTCTCTGAGTTACTGTACTTTTAATTAAGTCAAAACTTTCAACAACGGATCTCTTGGTTCTG
>OTU_1374	AAGTCGTAACAAGGTTTCCGTAGGTGAACCTGCGGAAGGATCATTACCTGGCCTTGGGCCGCTCGCGGGAGCTAGTCGCTTGCGACGACGCTACCGAGGGCGCTTAGCCCTTGACTATCACCTTGACTACGTGCACCTTTTGTTGTTTCCTCGGCAGGTCACCTGCCGCCAGGAACCCTCTAAACCTTTTGCAATAGCATCCAAACTTCTGAAAACAAACCAAATTATTTACAACTTTTAACAATGGATCTCTTGGTTCTG
>OTU_1375	AAGTCGTAACAAGGTTTCCGTAGGTGAACCTGCGGAAGGATCATTAGCGAAGTCAAGTCCGGACCCGTTGGGGATTGTAGCTGGCCTAACGACAAGTGCTCGTCCCTCGGGTACGTGACCTTCACTACCACACCCCACTGTGAACCAAGCGGGAGGTCGAAAGGCCTCTTGCATCTTATATAAACCCCAATTGCATGTCTTAGAATGTCATAGCGTTAACTCGCAACTATACAACTTTCAACAACGGATCTCTTGGCTCTC
>OTU_1376	AAGTCGTAACAAGGTTTCCGTAGGTGAACCTGCGGAAGGATCATTCACTTTATACAGTCTGTCTTGTATGATGCAGACTCAAAACCCTATTATACTACCAAAACCTAAACCCCGGGGTTGCAGACTACTGGCCCCGCATACGCTGTTGGTAGGAGAGGCGACCCATGTCTCCAACCGAAAAGTCTGATAATATTGATCTCAGTTTTATGCTATATGCACAATTATTTATTACAACTTATTGCAATGGATAAATTGGCTCTC
>OTU_1377	AAGTCGTAACAAGGTCTCCGTTGGTGAACCAGCGGAGGGATCATTAAAGAGTTGCAAAACTCCCTAAACCATTGTGAACCTACCTTCAACCGTTGCTTCGGCGGGTTGGGCCACCGGGTCTCCCGGCGGCTCCCCCGGCCCTCCCCCAACCTCGGGGGTGGCGGCCCGCCGGAGGTACCTAACTCTTGAACACTGTATGGCCTCTCTGAGTCTTCTGTACTGAATAAGTCAAAACTTTCAACAACGGATCTCTTGGTTCTG
>OTU_1378	AAGTCGTAACAAGGTCTCCGTTGGTGAACCAGCGGAGGGATCATTACAGAGTTGCAAGACTCCCAAACCACTGTGGACCTTACCTAACCGTTGCTTcggcgggcggcgccagggcccccacgggcccgccagcgcgccccccggcccccctcgcgggggGCGCCCGCCGGAGGCTCCAAACCATTCTCGCATGCAAAAGGCCTCTCTGAGTCTTCTGTACTGAATGAGTCAAAACTTTCAACAACGGATCTCTTGGTTCTG
>OTU_1379	AAGTCGTAACAAGGTTTCCGTAGGTGAACCTGCGGAAGGATCATTACCGAGTGCGGGACCCCAAGGTCCCAACCTCCCACCCGTGTCGTAACCGTACCTTTGTTGCTTTGGCGGGCCCACCTCGGGTCCTCCCCAGGTCGCCCGGGGGCACTCCGCTCCCGGGCCCGCGCCCGCCAAAGACCCTCTTGAACTCTGGTTGATTTAGGGAGTCTGAGTCCTTGATAATTATTAAAACTTTCAACAACGGATCTCTTGGTTCCG
>OTU_138	AAGTCGTAACAAGGTTTCCGTAGGTGAACCTGCGGAAGGATCATTAACAACGTATCCTAAACGTAAAATGTGAACTTTCATAACCCGAGCTTGCTAGGCCCGCGAAATTCAGCAATCCCTGGTAAATCATTGTTGACCAGCTCTTTGAGTCAGGGATATCCGAACTAGTCGTGTGGATTAAGTTCCGTGAAGCAAGAGCGGTGAGGCAAGTGACCCGGTACCCCCAAGCAATCAATGTTCTGTCAGTGTCGTTGATTGTGTAAGGGTGGCGCAGTAAACGATCGCTGGAGGCCACCACGGCCGGCGACTGGGTCAGCGAGCTCTGCTCCTTAATAACCCCACCTAAGGATTAGCTCGGCGAAAGCTTGAGCACCAAAAACTAATACGACTGTTAACAAT…
>OTU_1380	AAGTCGTAACAAGGTCTCCGTTGGTGAACCAGCGGAGGGATCATTACCGAGTTTACAACTCCCAAACCCAATGTGAACGTTACCAAACTGTTGCCTCGGCGGGGTCACGCCCCGGGTGCGTAAAAGCCCCGGAACCAGGCGCCCGCCGGAGGAACCAACCAAACTCTTTCTGTAGTCCCCTCGCGGACGTATTTCTTACAGCTCTGAGCAAAAATTCAAAATGAATCAAAACTTTCAACAACGGATCTCTTGGTTCTGGCA
>OTU_1382	AAGTCGTAACAAGGTTTCCGTAGGTGAACCTGCGGAAGGATCATTACAGTATTCTTTTTGCCAGCGCTTAATTGCGCGGCGAAAAAACCTTACACACATTGTCTAGTTTTTTTGAACTTTGCTTTGGGTGGTGAGCCTGGCTTACTGCCCAAAGGTCTAAACACAttttttttAATGTTAAAACCTTTAACCAATAGTCATGAAAATTTTTAACAAAAATTAAAATCTTCAAAACTTTCAACAACGGATCTCTTGGTTCTC
>OTU_1383	AAGTCGTAACAAGGTCTCCGTAGGTGAACCTGCGGAGGGATCATTACCGAGTTAGGGTCTCACCGGCCCGACCTCCCAACCCTTTGTCTACTTGACCATCGTTGCTTCGGCGAGCCCGTCCTCATGGACCGCCGGAGGGACCTTTACCGGCCCGCGCTCGTCGATGGCCCCCAACTTTAAAATCTCAACTAAACATGTCTTGAATCTAAGTATTATTGTTAAATAAAAACAAAACTTTCAACAACGGATCTCTTGGTTCTG
>OTU_1384	AAAGTCGTAACAAGGTCTCCGTTGGTGAACCAGCGGAGGGATCATTACCGAGTTTACAACTCCCAAACCCAATGTGAACCATACCAAACTGTTGCCTCGGCGGGGTCACGCCCCGGGTGCGTCGCAGCCCCGGAACCAGGCGCCCGCCGGAGGGACCAACCAAACTCTTTTCTGTAGTCCCCTCGCGGACGTTATTTCTTACAGCTCTGAGCAAAAATTCAAAATGAATCAAAACTTTCAACAACGGATCTCTTGGTTCTG
>OTU_1385	AAGTCGTAACAAGGTTTCCGTAGGTGAACCTGCGGAAGGATCATTAACAAATCTGCTACATGGCGAGCCCGCAAGGGAGCGCACATGTAAATATACCCCCGGAGCTGGTGTTACATCCAGCTTTGGTTGGGTGGCTCGAGCCCCTGGGCTTGGGCTGCTCGGGCAGTGCTTCGGTACTGGCCACATAGACGCTTGTATGTTTGACAGAGTACAGTTGTATAACAAAAATGACAACTTTTAACAATGGATCTCTTGGCTCTT
>OTU_1387	AAGTCGTAACAAGGTTTCCGTAGGTGAACCTGCGGAAGGATCATTATCACGTATCCACGTATAAACCTGAGTAACTGTTTGTACCTCCTTTTGGTGGGTGAAGATAGGGTTCATTCTCTGTTTTTGCCTGCTGAGAGGTCGTATTTATTAACTCGTAAAACATCATTATAACTCTGTACTAATCAGTTTTTACTCTGGAAACGGAGACTAACTAAATACGAAACATAAGAACAACTCTTAGCAACGGATATCTTGGTTCTC
>OTU_1388	AAGTCGTAACAAGGTTTCCGTAGGTGAACCTGCGGAAGGATCATCAATGAATCTTATACCCTCTAAACACGCTCTGTGCAATTGTGACACTTGGTTGGTGGGGGGGAAGGAGGAGAGCTTAGCTTTTGCTTTGCTTCTTGCCGccccccccccATCTTCCAACTTTCATAAACCCGCTTTTTTAACCCTTTATTCCCACGACTGAAAAAACACAAAACGAAAACCAAAAGACAACTTTTAACAACGGATCTCTTGGCTCTC
>OTU_1389	AAGTCGTAACAAGGTTTCCGTAGGTGAACCTGCGGAAGGATCATTACCGAGTGTAGGGTTCCTAGCGAGCCCAACCTCCCACCCGTGTCTATCGTACCTTGTTGCTTCGGCGGGCCCGCCGTTTCGACGGCCGCCGGGGAGGCCTCGCGCCCCCGGGCCCGCGCCCGCCGGAGACACCACGAACTCTGTCTGATCTAGTGAAGTCTGAGTTGATTGTATCGCAATCAGTTAAAACTTTCAACAATGGATCTCTTGGTTCCG
>OTU_139	AAGTCGTAACAAGGTTTCCGTAGGTGAACCTGCGGAAGGATCATTAACACGTATCCAACGTTAAAACAACCCTGTGAACCTTTAGCGTGCTCTTGCAGCCCATGAAAGCAGCAATCCCTGGTAAATCATTGTTGACCAGCTCTTTGAGTCAGGGATATCCGAACTAGTCGTGTGGATTAAGTTCCGTGAAGCAAGAGCGGTGAGGCAAGTGACCCGGTACCCCCAAGCAATCAATGTTCTGTCAGTGTCGTTGATTGTGTAAGGGTGGCGCAGTAAACGATCGCTGGAGGCCACCACGGCCGGCGACTGGGTCAGCGAGCTCTGCTCCTTAATAACCCCACCTAAGGATTAGCTCGGCGAAAGCTTGAGCACCAAAAACTAATACGACTGTTAACAATG…
>OTU_1390	AAGTCGTAACAAGGTCTCCGTAGGTGAACCTGCGGAGGGATCATTCACATGATTTACTTTAATAAACAACCTGTGAACTTTATATACTATTCGTATGTAATAACAATTGTTATTATCATACTGTCATTCGATGAACATTAGATAGCTGGCTCGTTTTTTATTAAACTTTCTCAGCTGATTTGTTTTTGTTAGACTAAACATCTATTCAATACAATCAACCAAACATAGAAACAACTCTATGCCCTGGATATCTTGGTTCTC
>OTU_1391	AAGTCGTAACAAGGTTTCCGTAGGTGAACCTGCGGAAGGATCATTAACAAATCATTTGTAGACTCTGGACGTTAAACTCCAGACGACACATAAACCCGAACCTGTGCAGCAATGCCAGGCAAGGTGTGCGGTTTCGGCCGTACGGGAAAAGGTCTTGCTCCTCGGAGTGGGATTGGACCCCAAATAGACGCTTGTATGTTTGACAGAGTTTAGTTGACACTTTAAAAATGACAACTTTTAACAATGGATCTCTTGGCTCTT
>OTU_1392	AAGTCGTAACAAGGTTTCCGTAGGTGAACCTGCGGAAGGATCATTAAAAGATTTAGCATATTCTTCTGAATATACTTCATTAACCCATTCCGAGTACCTTACCCGTTGCTTCCGCGAGGCTGTCCTCACGGCCCTTTGAAGATTTATCTTTGGAGAGTCCTTGCGGGAGGTATACAATAAACTCTTGCATTACCATGTCATCTGTCTGAATCTGTTTAAAACAAATATTAAAACTTTCAACAACGGATCTCTTGGTTCTC
>OTU_1393	AAGTCGTAACAAGGTTTCCGTAGGTGAACCTGCGGAAGGATCATTACCGAGTGTAGGGTTCCTAGCGAGCCCAACCTCCCACCCGTGTTTACTGTACCTTAGTTGCTTCGGCGGGCCCGCCATTCATGGCCGCCGGGGGCTCTCAGCCCCGGGCCCGCGCCCGCCGGAGACACCACGAACTCTGTCTGATCTAGTGAAGTCTGAGTTGATTGTATCGCAATCAGTTAAAACTTTCAACAATGGATCTCTTGGTTCCGGCA
>OTU_1394	AAGTCGTAACAAGGTCTCCGTTGGTGAACCAGCGGAGGGATCATTACCGAGTTATACAACTCCCAAACCCACTGTGAACCTTACCTCAGTTGCCTCGGCGGGACCGCCCCGGCCGCCGCGCAAGCGGCGCCGGACTCCAAGGCGCCCGCCGCAGGGACCCAAAACTCTTTTGCATTACGCCCAACGGCGGGAATTTTTTCTCTGAGTGCATAAGCAAAACAAATGAATCAAAACTTTCAACAACGGATCTCTTGGTTCTG
>OTU_1395	AAGTCGTAACAAGGTTTCCGTAGGTGAACCTGCGGAAGGATCATTACCGAGTGAGGGTCCCTCGGGGCCCAACCTCCCATCCGTGTTGTCCTGACACCTGTTGCTTCGGCGGGCCCGCCGTGGTTCACGCCCCGGCCGCCGGGGGGTTCACGCCCCCGGGCCCGCGCCCGCCGAAGACCCCTGGAACGCTGCCTGGAAGGTTGCCGTCTGAGTATACAATCAATCAATTAAAACTTTCAACAACGGATCTCTTGGTTCCG
>OTU_1396	AAGTCGTAACAAGGTAACCGTAGGTGAACCTGCGGTTGGATCATTAATAAATGAATTGGTTTTATACCAAAACATTGTGTGCAATTATATCTGTCTCTGGTGGTTAATGTTTCTTGTTTTGCTGGATCGTTTTTCAGTGGGGCAAGAACACACTACCACCAATTGAATACACAAACCTTTTGTATGtttttttttATGTCTGAATCATTCACTTTTGTGCAATGAAAAAACAACTTTTGACAACGGATCTCTTGGCTCTC
>OTU_1397	AAGTCGTAACAAGGTTTCCGTAGGTGAACCTGCGGAAGGATCATTACCGAGTGCGGGTCCTTTGGGCCCAACCTCCCATCCGTGTCTATCGTACCTTGTTGCTTCGGCGGGCCCGCCGTTTCGACGGCCGCCGGGGAGGCCTCGCGCCCCCGGGCCCGCGCCCGCCGAAGACCCCAACATGAACTCTGTTCTGAAAGTATGCAGTCTGAGTTGATTATCATAATCAGTTAAAACTTTCAACAACGGATCTCTTGGTTCCG
>OTU_1398	AAGTCGTAACAAGGTCTCCGTTGGTGAACCAGCGGAGGGATCATTAAAAGAAGCCGAAAGGCTACTTAAAACCATCGTGAACTCGTCCAAGTTGCTTCGGCGGCGCGGAGCCCTCCTCACCGGGGGCGCCGCAGCGCCCGCGccccccccGGGGGTTGCGGGAGCGCCCGCCGGAGGTCACAAACTCTCATGTATTATAGTGGATCTCTGAGTACAAAACAAATAAGTTAAAACTTTCAACAACGGATCTCTTGGTTCTG
>OTU_1399	AAGTCGTAACAAGGTCTCCGTTGGTGAACCAGCGGAGGGATCATTACAGAGTTGCAAGACTCACCAAACCATTGTGAACCGTACCCTTTACCGTTGCCTcggcgggcggcgccccgtgcccttcgcggccgcgggcgccccccagccccgccgcgggggcCCGCCGGAGGAATACCCCAAACCCTTTTGGCAGCACGCGGCCTCTCTGAGTCTCTGTACCGAATAAGTCAAAACTTTCAACAACGGATCTCTTGGTTCTG
>OTU_14	AAGTCGTAACAAGGTCTCCGTAGGTGAACCTGCGGAGGGATCATTAACACTATTTGTTTGGTTCGGAGCAATCCGCTATCACTCAAATTAAAACCAACACACCACGTGAACTAGGGTCTGGCTGAACTGGTAGCTTGCTATTGGGTAATTGTCAGGCCCGATCCTCCCATTTTTCTAGAAGCGCTCGCATCCGATGTGTAGCGGAGGTATAGCACCTCATCTGTGCAAGCACAGTATGGCCTTTGCGTTGTACTGTAAAGTTTCTAGATTAATGGACTAAATTTCGGTAGCTGCTACAGTCGAGAAAACCAAACCAACCTTTTTGTTGTTTAGGCAAAAACAATTTTCACCCCTTCGTACTCCAACTGACTGATTATGTCGTGTGACGAAACGCAAGTT…
>OTU_140	AAGTCGTAACAAGGTTTCCGTAGGTGAACCTGCGGAAGGATCATTAACAACGTATCCTAAACGTAAAAAACCCCCCCTGTGAACTTTCATAACCCGAGCTTGCTAGGCCCGCGAAATTCAGCAATCCCTGGTAAATCATTGTTGACCAGCTCTTTGAGTCAGGGATATCGTGTGGATTAAGTTCCGTGAAGCAAGAGCGGTGAGGCAAGTGACCCGGTACCCCCAAGCAATCAATGTTCTGTCAGTGTCGTTGATTGTGTAAGGGTGGCGCAGTAAACGATCGCTGGAGGCCACCACGGCCGGCGACTGGGTCAGCGAGCTCTGCTCCTTAATAACCCCACCTAAGGATTAGCTCGGCGAAAGCTTGAGCACCAAAAACTAATACGACTGTTAACAATG…
>OTU_1400	AAGTCGTAACAAGGTTTCCGTAGGTGAACCTGCGGAAGGATCATTATTGAATAAACTTTTCAAGTTTTTTTCATATTCCCTGTTTATATTAAATACGTTCCTTCCATCGGACAGGTCTATTAGGACCCTCTAGCTTGGGCAAATGCTTTTGCTGGAGAGTTGCCGGTGGCGTTTCTAAAAACAAAAACTTTTATATTACGAAATGTCTGAATATATTTTTAAATTAAATAAAACTTTCAACAACGGATCTCTAGGCTCTT
>OTU_1401	AAGTCGTAACAAGGTTTCCGTAGGTGAACCTGCGGAAGGATCATTACCGAGTGAGGGCCCTCTGGGTCCAACCTCCCACCCGTGTCTATCGTACCTTGTTGCTTCGGCGGGCCCGCCGTTTCGACGGCCGCCGGGGAGGCCTTGCGCCCCCGGGCCCGCGCCCGCCGAAGACCCCAACATGAACGCTGTTCTGAAAGTATGCAGTCTGAGTTGATTATCGTAATCAGTTAAAACTTTCAACAACGGATCTCTTGGCTCTG
>OTU_1402	AAGTCGTAACAAGGTTTCCGTAGGTGAACCTGCGGAAGGATCATTACCATGGCGCAGAAGGTGGTGGACATACTGGTAACCCCCAGGAGTTAACCCCTTCACGCTCTTCTACCCTTGTCTATTTGCACCCCTTTGTCGTTCCCTCGGCGGGTCTTTGAACCTGCCGGCGGCAACTTTCAAAACCTCTTGCAGTAGTATCTAATTCTTCTGATTCAAATATCAAATTATTACAACTTTCAACAATGGATCTCTTGGTTCTG
>OTU_1403	AAGTCGTAACAAGGTTTCCGTAGGTGAACCTGCGGAAGGATCATTACCGAGTGTAGGGTTCCTAGCGAGCCCAACCTCCCACCCGTGTTTACTGTACCTTAGTTGCTTCGGCGGGCCCGCCATTCATGGCCGCCGGGGGCTCTCAGCCCCGGGCCCGCGCCCGCCGGAGACCCCAACACGAACACTGTCTGAAAGCGTGCAGTCTGAGTTGATTGTATCGCAATCAGTTAAAACTTTCAACAATGGATCTCTTGGTTCCG
>OTU_1404	AAGTCGTAACAAGGTCTCCGTTGGTGAACCAGCGGAGGGATCATTACTGAGTTACCGCTCTACAACCCTTTGTGAACATACCTTAACTGTTGCTTCGGCGGGCAGGAGGACAACCCCCCTCGGGGGGCGGTCCCCCTCCCGGCCGCGCCCTCACGGGCGTGGCGCCCGCCGGAGGATACCAAAACTCTATTTTAACGACGTTTCTTCTGAGTGGCACAAGCAAATAATTAAAACTTTTAACAACGGATCTCTTGGTTCTG
>OTU_1405	AAGTCGTAACAAGGTTTCCGTAGGTGAACCTGCGGAAGGATCATTATTGAATGAATTTAGGAGTTGGTTTGATGCTGGCCGACAACCCCAAGGGCATTGTGCACGCCTTCTCCTTCATCCACACACACCTGTGCACTTGTGAGACGCGAGGATTAATTTCCTCCGTCTACTAATCACACAAACTCATTGTAATTGAACTGAATGTAATTGATGTAACACATCATTTGAACTAAGTTTCAACAACGGATCTCTTGGCTCTC
>OTU_1406	AAGTCGTAACAAGGTCTCCGTTGGTGAACCAGCGGAGGGATCATTACAGAGTTTACAACTCCCAAACCCTTATGTGAACATACCAAGATGTTGCTTCGGCGGACTCGCCCCGGCGTCCGGACGGCCTAGCGCTGCCCGCGGCCCGGACTCAGGCGGCCGCCGGAGACCACCAAACTCTTTTGTATCATGAGTATCTTCTGAATCCGCCGCAAGGCAAAACAAATGAATCAAAACTTTCAACAACGGATCTCTTGGTTCTG
>OTU_1407	AAGTCGTAACAAGGTTTCCGTAGGTGAACCTGCGGAAGGATCATTACCAAGGTGCTCGCTCCGGTCCCAGGACCGTGGAGCGGCATTCTAAACCCTTTGTGAACCAAAAAACCCTTCGCTTCGGCAGCAGCTCGGCTGGGAACAGCCCGCGTCAGCCTGCCGCTAGCACCAAACATAAAAACTTGCAGTCTAGAACATTGTCTGATGACCAAATTTTCGAATGAAAATCAAAACTTTCAACAACGGATCTCTTGGTTCCC
>OTU_1408	AAGTCGTAACAAGGTCTCCGTTGGTGAACCAGCGGAAGGATCATTACCGAGTGAGGGCCCTCTGGGTCCAACCTCCCACCCGTGTCTATCGTACCTTGTTGCTTCGGCGGGCCCGCCGTTTCGACGGCCGCCGGGGAGGCCTCGCGCCCCCGGGCCCGCGCCCGCCGAAGACCCCAACATGAACTCTGTTCTGAAAGTATGCAGTCTGAGTTGATTATCATAATCAGTTAAAACTTTCAACAACGGATCTCTTGGTTCCG
>OTU_1409	AAGTCGTAACAAGGTCTCCGTTGGTGAACCAGCGGAGGGATCATTACAGAGTTGCAAAACTCCCTAAACCATCGTGAACGTTACCCAAAACCCGTTGCTTCGGCGGGCGGCTCCGGGCCCAGCCCGGCGCCCCTCGGccccccccccAACAGCGGGCGGGGCGCCCGCCGGAGGAAACCAAACTCTTCTGATATCTTGGCCACTCTGAGTCTTCTGTACTGAATAAGTCAAAACTTTCAACAACGGATCTCTTGGTTCTG
>OTU_141	AAGTCGTAACAAGGTTTCCGTAGGTGAACCTGCGGAAGGATCATTAACAACGTATCCTAAACGTAAAAAACCCCCCCTGTGAACTTTCATAACCCGAGCTTGCTAGGCCCGCGAAATTCAGCAATCCCTGGTAAATCAGCTCTTTGAGTCAGGGATATCCGAACTAGTCGTGTGGATTAAGTTCCGTGAAGCAAGAGCGGTGAGGCAAGTGACCCGGTACCCCCAAGCAATCAATGTTCTGTCAGTGTCGTTGATTGTGTAAGGGTGGCGCAGTAAACGATCGCTGGAGGCCACCACGGCCGGCGACTGGGTCAGCGAGCTCTGCTCCTTAATAACCCCACCTAAGGATTAGCTCGGCGAAAGCTTGAGCACCAAAAACTAATACGACTGTTAACAATG…
>OTU_1410	AAGTCGTAACAAGGTCTCCGTTGGTGAACCAGCGGAGGGATCATTAAAGAGCGTAAAAACTCCTTAAAACCATCGCGAACTCATCCCGTCATCGTTGCTTcggcgggcggccccaggggggggccgcagccccggaccggcctccgggcccgggagggggCGCCCGCCGGAGGTATCCACAACTCTTTTGTAACGCAGCGGCATCTCTGAGTAAGCAAGCAAATAAGTCAAAACTTTCAACAACGGATCTCTTGGTTCTG
>OTU_1411	AAGTCGTAACAAGGTCTCCGTTGGTGAACCAGCGGAGGGATCATTACAGAGTTACACAACTCACCAAACCATTGTGAACCGACCCTTCTGTTGCTTCGGCGGGAGGCGCCTCGGCGCCCCTCGGCCGATCCCCCCGGCCCCCGCGGCGTGGGGGGAGGCTCCCGCCGGAGGAATACCCCAAACCCTTTTGCAGCACATGGCCTCTCTGAGTTTATGTACTGAATAAGTCAAAACTTTCAACAACGGATCTCTTGGTTCTG
>OTU_1412	AAGTCGTAACAAGGTTTCCGTAGGTGAACCTGCGGAAGGATCATTATCAAATTTTCCACATCAACCCTCTGTGCACCTTTGATTTGTGTGGCAGCATGTGTCCTCTGGATGCTTGCTACGCGCCAAAAGCGCTCACCCAATTCATGTCAAACCTGTTTTGTATGCAAGAATTCTTTAGCCGAAGAATTCTGTTGTCTGAAACTATATTCCAATTCATTTAATGAAAAATATAACTTTTAACAACGGATCTCTTGGCTCTC
>OTU_1413	AAGTCGTAACAAGGTCTCCGTTGGTGAACCAGCGGAGGGATCATTACAGAGTTATCACAACTCCCAAAACCATCGCGAACTTTACCTTCAACCGTTGCTTCGGCGGGCGGCGCCCGGCCCCGTGCCGCGGCGCCCCCTGGGGCCCCGAGAGGGGCTGCCCGCCGGAGGAAAACCCCAAACCATTTGATACCACATTGGCCTCTCTGAGTCTTCTGTACTTGAATAAGTCAAAACTTTCAACAACGGATCTCTTGGTTCTG
>OTU_1414	AAGTCGTAACAAGGTCTCCGTTGGTGAACCAGCGGAGGGATCATTACAGAGTTGCAAAACTCCCTAAACCATTGTGAACGTTACCTTCAAACCGTTGCTTCGGCGGGCGGCGCCGCCCCGGGGGGAGACCCCCGCGGCGCGCCCCTCGGCCCCTCACCGGGCGCCCGCCGGAGGTACCTAACCCTTTACGCATGTATGGCCTCTCTGAGTCTTCTGTACTGAATAAGTCAAAACTTTCAACAACGGATCTCTTGGTTCTG
>OTU_1415	AAGTCGTAACAAGGTTTCCGTAGGTGAACCTGCGGAAGGATCATTATTGAATGAACTTGGGGTTGGTTGTCGCTGGCTGTCTTTGGCAGCATGTGCACGCCTTCTCCTTTCATCCACACACCCCTGTGCACCTGTGAGACTGGAGGCCGTAAAAAGCTTTCAGTCTGCTAAATTCATATACAAACTCATTTAATTGAACTGAATGTACTTGATGTAACGCATCATTAAACTAAGTTTCAACAACGGATCTCTCGGCTCTC
>OTU_1416	AAGTCGTAACAAGGTCTCCGTTGGTGAACCAGCGGAGGGATCATTACCGAGTTCTTCAACTCCCAAACCCCTGTGAACGCACCCCAGACGTTGCTTCGGCGGACCGCCCCGGCGCCCTCCCTCCCTCCCCGGGGGGGCGGGCCCGGAGCCAGGCGCCCGCCGGGGGACCCAAACTCTTGTCTTTCGCCCGCCGCGGCGTCTTTCTTCTGAGTGAGAGCAAAAACGAATCAAAACTTTCAACAACGGATCTCTTGGTTCTG
>OTU_1417	AAGTCGTAACAAGGTCTCCGTTGGTGAACCAGCGGAGGGATCATTACCGAGTTATACAACTCCCAAACCCACTGTGAACCTTACCTCAGTTGCCTCGGCGGGAacgccccggccgccggcccccgcgccggcgccggacccaggcgcccgccgcAGGGACCCCAAACTCTCTTGCATTACGCCCAGCGGGCGGAATTTCTTCTCTGAGTGACACATAAACAAATAAATAAAAACTTTCAACAACGGATCTCTTGGTTCTG
>OTU_1418	AAGTCGTAACAAGGTCTCCGTTGGTGAACCAGCGGAGGGATCATTACAGAGTTGCAAAACTCCCCAAACCATCGTGAACCTTTACCGCTAAACAGTTGCTTCGGCGGGTGGCCCGCGGGGGTGCGCGCAAGCCGCGCGCCCCCGGGGGCCGCCGAGCCCGCCGGAGGAATCCAAAAAACCATCGCTTTCAGTACCGGCCTCTCTGAGTTACTGTACTTTTAATTAAGTCAAAACTTTCAACAACGGATCTCTTGGTTCTG
>OTU_142	AAGTCGTAACAAGGTTTCCGTAGGTGAACCTGCGGAAGGATCATTAACACGTATCCAACGTTAAACCCCCCCGTGAATATTAATCGTGCTCTTGCATCCTCCCAATCAGCAATCTCTGGTAAATCACGTCGAACGGTTTGATTCAGAGACCTCTGCGTTGTGGATGACTGCTGACGCTAAAGGTGCAATCGAGCGCTAGGATCAGTGGTTTGGTTTCCCCTCAAACCACTTCAATGAATGACAGCGTCATTGAAGTGTGATGGGGAGGTCGCTTAACGCACGCTGTAGGCTCACACGAGCCGGCGTCCAAATCACCGGGCGCAAGCCCCCCTAAAACCACATGTCAGCGTAGGCCCTTCTGTCGTGGTTGGGCGTAAAAACGAACAACTGTTAACAATG…
>OTU_1421	AAGTCGTAACAAGGTTTCCGTAGGTGAACCTGCGGAAGGATCATTACAGTATTCTTTTTGCCAGCGCTTAATTGCGCGGCGAAAAAACCTTACACACATTGTCTAGTTTTTTTGAACTTTGCTTTGGGTGCATCAGCCTAGCTGCGTGCCCAAAGGTCTAAACACATTTTTTAATGTTAAAACCTTTAACCAATAGTCATGAAAATTTTTAACAAAAATTAAAATCTTCAAAACTTTCAACAACGGATCTCTTGGTTCTC
>OTU_1422	AAGTCGTAACAAGGTTTCCGTAGGTGAACCTGCGGAAGGATCATTACCGAGTGCAGGTCTGCCCCCGGGCAGGCCTAACCTCCCACCCTTGTCTCTATACACCTGTTGCTTTGGCGGGCCCACCGGGGCCACCTGGTCGCCGGGGGACGCACGTCCCCGGGCCCGCGCCCGCCGAAGCGCTCTGTGAACCCTGATGAAGATGGGCTGTCTGAGTACTATGAAAATTGTCAAAACTTTCAACAATGGATCTCTTGGTTCCG
>OTU_1424	AAGTCGTAACAAGGTCTCCGTTGGTGAACCAGCGGAGGGATCATTACGAAAAGGAGTTCTCGGACTCTTAAACCCTTTGTGAACCTTACCTATCGTCAGTTGCTTCGGCGGGAGGCCCCTGGGAGGGGCCCCGGGGCCCGGCCTGAGCCGGGCTCCCGCCGGAGGAGCGCAAACCAAACTCTTGCTGTACCTCAGTGGAACATCCGAGTTAAAAATAAAAAACAAGTTAAAACTTTCAACAACGGATCTCTTGGTTCTG
>OTU_1425	AAGTCGTAACAAGGTCTCCGTTGGTGAACCAGCGGAGGGATCATTACCAGAGTTTTCACAACTCCCAACCCTCCTGTGAACCTACCCATCGTTGCTTCGGCGGACTCGCCCCAGCGTCCGGACGGCCTCGCGCCGGCCCGCGACCTGGACCCAGGCGGCCGCCGGAGACCACGCAACCCTGCATCCATCAGTCTCTCTGAATCCGCCGCAAGGCAACACAAACGAATCAAAACTTTCAACAACGGATCTCTTGGTTCTG
>OTU_1426	AAGTCGTAACAAGGTTTCCGTAGGTGAACCTGCGGAAGGATCATTACCGAGTGTGGCCCCTTCGGGGTGCCGACCTCCCACCCGTGTCTATAGTACCACGTTGCTTCGGTGGGCCTGCCCCCCAACAAGGGGGGCTGCCAGGGGGCATCTGCCCCTGGGCAAGCGCCTGCCGGAGACCACACGAACGCTGTCTGAAGACTGCCGTCTGAGTGGATTTTTAAATCAGTCAAAACTTTCAACAACGGATCTCTTGGTTCCG
>OTU_1427	AAGTCGTAACAAGGTTTCCGTAGGTGAACCTGCGGAAGGATCATTATGAATTTGAGCAAGTTCTTTTTCTCTTTTCCGAAAGAGAGAGAGGGCTTTCATTTTCTGTGAACTGTTGGAGAGGAGGTGGCTTGAGCAATCGAGTCGTCTCTTCTCTCTTTTGTTATCTTGTCTTCTATTCCAATTCTTATTTGGTTGATTCTTTATCAGCTGAATAATATACAAACCAAGACAACTTTCAGCAATGGATCTCTTGGCTCTT
>OTU_1428	AAGTCGTAACAAGGTCTCCGTTGGTGAACCAGCGGAGGGATCATTACCGAGTTTACAAACTCCCAAACCCCTGTGAACTTATACCACAAACGTTGCTTCGGCGGGTTTTACGCCCCGGAACGCCGCCCCCTCAGGGGACCGGCACCGGATCCATGGCGCCCGCCGGAGGACCCAAACTCTTCTGTATTTTACAATGCATGTCTGAGTGGATTTAATATCAAATGAATCAAAACTTTCAACAACGGATCTCTTGGTTCTG
>OTU_1429	AAGTCGTAACAAGGTCTCCGTTGGTGAACCAGCGGAGGGATCATTACCGGGTCTAGCGACTGCCCGAACCACCACACCGTGCACCGTACCGTTCCTACGCTGCGCCGCGGCGGGCCGCTCGCTGGAGGAGCCCCGGGCCGAGAGGCCGGCCCGCCGGAGGCGAACTGGAAAAGAAGTCCCCTGAAGCTCTTCTGAGAGGCGCCGAAAGCCTTCCTTCGGGAGGTGATCACAACCCACAACAATGGATCTCTTGGCTCTG
>OTU_143	AAGTCGTAACAAGGTTTCCGTAGGTGAACCTGCGGAAGGATCATTATCATAACGTATCCACGTATAAACCAACTTTAAATTGATGTGAAACGTAACTGTTTTAACACCTCGAGATAATCAGATGATTGCTATACTTACATTGTTTGCGTGATTAAAGCAAAAACGGTTAGTATGGACTTGCCTGTAACAAGGCTAGCGCTGATTATTTGGAGTGTAAAAATTTAATCAACTATTAACCCATTGAACCGAATTACTATATTCTTAACTGAGTTTAGTTATTCATTTTAATTTCTATTGTGTGAACTGAATTGTCTACTTACTTGACACCGTCATTGGTGGAGAGAAGTCGATTATATTTACGAAACATTATAAATTTCTATGAACAACTCTTAGCAACGG…
>OTU_1430	AAGTCGTAACAAGGTTTCCGTAGGTGAACCTGCGGAAGGATCATTACCTTCTAGTTATTTTGACTAGTCGGGGGCTGGCTTGCGATGTCCCAAAAGGACCCCTGCCGCCCTGGCTACATCCTTGTCTATTGCGTACTACATGTTTCCTCGGTAGGCTTGCCTGCCGATTGGACAACCATTAAACTCTTTTGTAATTGCAATCAGCGTCTGAAAATAATTTTAATTATTACAACTTTCAACAACGGATCTCTTGGTTCTG
>OTU_1431	AAGTCGTAACAAGGTTTCCGTAGGTGAACCTGCGGAAGGATCATTAACAAATCATCATAGTCGTGCGCTTCGGCGCACCGCTATATACACCCCAAGCCTGGGAAGAGCAGCAATGCTTGGAACGGCTTTGGTTGCAGCCCTCGGGCTGTAGGCTAGGGAGCCGCAAGGCCGACTAGCCACATAGACGCTTGCTTAGTTTGACAGAGTTTAGTTGACATTTTAAAAAATACAACTTTTAACAATGGATCTCTTGGCTCTT
>OTU_1432	AAGTCGTAACAAGGTTTCCGTAGGTGAACCTGCGGAAGGATCATTACCGAGTGAGGGCCCTCTGGGTCCAACCTCCCACCCGTGTTTACCATACCCTGTTGCTTCGGCGGGCCCGCCCTCAGCGGCCGCCGGGAGGGCCCCTTGCGCCTCCGGGCCCGCGCCCGCCGAAGACACCTGTGAACGCTTCTATTGAAGATTGCAGTCTGAGTGATTTTTTCCAAATCAATCAAAACTTTCAACAACGGATCTCTTGGTTCCG
>OTU_1433	AAGTCGTAACAAGGTTTCCGTAGGTGAACCTGCGGAAGGATCATTACCGAGTGTAGGGTTCCTAGCGAGCCCAACCTCCCACCCGTGTTTACTGTACCTTAGTTGCTTCGGCGGGCCCGCCTTAACTGGCCGCCGGGGGGCTTACGCCCCCGGGCCCGCGCCCGCCGAAGACACCCTCGAACTCTGTCTGATCTAGTGAAGTCTGAGTTGATTGTATCGCAATCAGTTAAAACTTTCAACAATGGATCTCTTGGTTCCG
>OTU_1434	AAGTCGTAACAAGGTCTCCGTTGGTGAACCAGCGGAGGGATCATTACAGAGTTTACAACTCCCAAACCCAAATGTGAACATACCAATCGTTGCTTCGGCGGACTCGTCCCAGCGTCCGGGTGGCCTTGCGCCGCCCGCGGCCTGGAACCAGGCGACCGCCGGAGGCCATTCAAACTCTTTGTATTACCAGTATCTTCTGAATCCGCCGCAAGGCAAAACAAATGAATCAAAACTTTCAACAACGGATCTCTTGGTTCTG
>OTU_1435	AAGTCGTAACAAGGTCTCCGTTGGTGAACCAGCGGAGGGATCATTACAGGGTCTTCGACTGCCCAAAAAACACCTGTGAACCTTTTTTTAAAGCAAAAGACTGCGGCGGGCGACTCGCTGGAGGAGTCGTCAAGAGCCCGCCGGAGTCGACGCTGAAGCTGTTGCGCCGAGAAAATTCTTCTGACTATTATGCGCCCCTGCTTAGGCGGGGTAAGTAAAAAATAAATCACAACCCATAACAATGGATCTCTTGGCTCCG
>OTU_1436	AAGTCGTAACAAGGTTTCCGTAGGTGAACCTGCGGAAGGATCATTACCGAGTGAGGGTCCCTTGCGGGCCCAACCTCCCACCCGTGTTTAACTGTACCGTGTTGCTTCGGCGGGCCCACTGGGGGCCCCCTGGTCGCCTGGGGGCGTGAAACCCCCCGGGCCCGCGCCCGCCGGAGACCCCATTGAACCCTGAGTGAATTGAGTGTCTGAGTGTGATTTTTAATCATTAAAACTTTCAACAACGGATCTCTTGGTTCCG
>OTU_1437	AAGTCGTAACAAGGTCTCCGTTGGTGAACCAGCGGAGGGATCATTAAAGAGTTGCAAAACTCCCAAACCATTGTGGACCTACCTTACAACCGTTGCTTCGGCGGGCGGCGCCGCCCCGGGGGGAGACCCCCGCGGCGCGCCCCTCGGCCCCTCACCGGGCGCCCGCCGGAGGTACCCCAAACCATTGATACTTTATGGCCTCTCTGAGTCTTCTGTACTGAATAAGTCAAAACTTTCAACAACGGATCTCTTGGTTCTG
>OTU_1438	AAGTCGTAACAAGGTCTCCGTTGGTGAACCAGCGGAGGGATCATTACCGAGTTATACAACTCCCAAACCCACTGTGAACCTTACCTCAGTTGCCTCGGCGGGAacgccccggccgccggcccccgcgccggcgccggacccaggcgcccgccgcAGGGACCCCAAACTCTCTTGCATTACGCCCAGCGGGCGGAATTTCTTCTCTGAGTCTTCTGTACTGAATAAGTCAAAACTTTCAACAACGGATCTCTTGGTTCTG
>OTU_1439	AAGTCGTAACAAGGTTTCCGTAGGTGAACCTGCGGAAGGATCATTACCGAGTGCGGGCCCTTTCTGGGCCTAACCTCCCACCCGTGTCTCTTGCGCACCCTGTTGCTTTGGCGGGCCCACCGGGTCATTCCGGTCGCCGGGGGGCACCATGCCCCCGGGCCCGCGCCTGCCAGAGCACCCCTGTGAACCCTGAGGAAGAGTGGCTGTCTGAGTCGGATGATAATCATTAAAACTTTCAACAATGGATCTCTTGGTTCCG
>OTU_144	AAGTCGTAACAAGGTTTCCGTAGGTGAACCTGCGGAAGGATCATTAACACGTATCCAACGTTAAAACCCCTGTGAACTTTCAGCCTGCTCGCGTAGCTTGTAGGGTTAAGCAGCAATCTCGGTAAATCAAGTGGGAGAAACAGTTCTGATTCGAGACCTCTGCACCATATGGGTTATTAGCTCGAAGCGGTAGAAGCAGTGGCATGGCGTCCCAAGCCTCCAGTGAATGACAGCGTCACTGGAACAAGTGAAGGATAACGCTTCTCGGTTGCTAGAGGTCGCTCACCGACCGGCAGACATGTCACAGGGCCTTGCGCCCCTTAACCACCCCATTCCAAATGTTACCCGCCTCCGATGAAAGTCCGGGGTaaaaaaaaaCCGAACAACTGTTAACAATGG…
>OTU_1440	AAGTCGTAACAAGGTTTCCGTAGGTGAACCTGCGGAAGGATCATTACCGAGTGCGGGCCCGCTCTGGGCCCAACCTCCCACCCGTGTCTCTTGCGTACTTTGTTGCTTTGGCGGGCCCACTGGGTCACTCCGGTCGCCGGGGAGCGCTATGCTCCCGGGCCCGTGCCCGCCAGAGCACCCCTGTGAACCCTGATGAAGAGAGGCTGTCTGAGTCCCACGATAATCGTTAAAACTTTCAACAATGGATCTCTTGGTTCCG
>OTU_1441	AAGTCGTAACAAGGTTTCCGTAGGTGAACCTGCGGAAGGATCATTACTGAGTGTGGGTTCCTTCTGGGCCCAACCTCCCATCCGTGTCTACCGTCCCTTTGTTGCTTTGGCGGGCCCACTGGGGCTGCCCTGGTCGCCGGGGGGTTCTCCAACCCCCGGGCCCGCGCCCGCCGAAGCGCCTTTGAACGCTATCATGAACAGTCTGTCTGAGTGGAGGGTATAATTATTAAAACTTTCAACAACGGATCTCTTGGTTCCA
>OTU_1442	AAGTCGTAACAAGGTCTCCGTTGGTGAACCAGCGGAAGGATCATTATAGTATTCTATTGCCAGCGCTTAATTGCGCGGCGATAAACCTTACACACATTGTCTAGTTTTTTTGAACTTTGCTTTGGGTGGTGAGCCTGGCTTACTGCCCAAAGGTCTAAACACAttttttttAATGTTAAAACCTTTAACCAATAGTCATGAAAATTTTTAACAAAAATTAAAATCTTCAAAACTTTCAACAACGGATCTCTTGGTTCTC
>OTU_1443	AAGTCGTAACAAGGTTTCCGTAGGTGAACCTGCGGAAGGATCATTACCGAGTGCGGGTCCCTCGTGGCCCAACCTCCCACCCGTGTTGACCGACACCTGTTGCTTCGGCGGGCCCGCCAGGGCTCCCGCCCGGCCGCCGGGGGGCCTCGTCGCCCCCGGGCCCGCGCCCGCCGAAGACCCCTCGAACGCTGCCTTGAAGGTTGCCGTCTGAGTATAAAATCAATCGTTAAAACTTTCAACAACGGATCTCTTGGTTCCG
>OTU_1444	AAGTCGTAACAAGGTCTCCGTTGGTGAACCTGCGGAAGGATCATTAACAAATCGAGTGCGCTTCGGCGCATATTAACCCGAACCCGGCGGGAACGCTGGGCTAGGTGCACGGTTAGGGCGCGAGCCCTTTAGCCGTGCGCACAGTGCGAAAGGGACCTAACCGTCTCTGGAACACTGTGCACATAGACGCTTGCATGTTTTTTGGTTTAGTTGACAACATCAAAATTGACAACTTTTAACAATGGATCTCTTGGCTCTT
>OTU_1445	AAGTCGTAACAAGGTTTCCGTAGGTGAACCTGCGGAAGGATCATTACCGAGTGCGGGTCCTCGTGGCCCAACCTCCCACCCGTGACTATTGTACCTTGTTGCTTCGGCGGGCCCGCCAGCTTGCTGGCCGCCGGGGGGCGTCTCGCCCCCGGGCCCGTGCCCGCCGGAGACCCCAACACGAACACTGTCTGAAAGCGTGCAGTCTGAGTTGATTGAATGCAATCAGTTAAAACTTTCAACAATGGATCTCTTGGTTCCG
>OTU_1446	AAAAGTCGTAACAAGGTTTCCGTAGGTGAACCTGCGGAAGGATCATTACTGAGTTTAGATGGAGGGGAGTAATCCCCTCCTCTTCTTCTCTTCACCCTTTGTTATTATTTGTACAAGTTGCTTTGGTGGTTGATTCTTATCTTCTGCCAGACAGCTTTTTCAAACACTCTGTTATCCAACAATTGAGATATCTTCTTGTCTAATTCTTTACGACTTGAATAAGTATGTAAAACTTTCAACAACGGATCTCTTGGTTCTG
>OTU_1447	AAGTCGTAACAAGGTTTCCGTAGGTGAACCTGCGGAAGGATCATTACCGAGTGAGGGCCCTCTGGGTCCAACCTCCCACCCGTGTCTATCGTACCTTGTTGCTTCGGCGGGCCCGCCGTTTCGACGGCCGCCGGGGAGGCCTCGCGCCCCCGGGCCCGCGCCCGCCGAAGACCCCAACATGAACTCTGTTCTGAAAGTATGCAGTCTGAGTACTTGACTAAATCAGTTAAAACTTTCAACAACGGATCTCTTGGTTCCG
>OTU_1448	AAGTCGTAACAAGGTCTCCGTTGGTGAACCAGCGGAGGGATCATTACGAAAGGAGTACTCGTACTCTCTAACCCTTTGTGAACTTACCTTTTGTCAGTTGCTTCGGCGGGAGGCCCCTGGGAGGGGCCCCGGGGCCCGGTCCTGAGCCGGGCTCCCGCCGGGGGAGCGCAACCAAAACTCTTGCTGTACCTCAGTGGCACCTCCGAGTAAACTAAATAAAAACAAGTTAAAACTTTCAACAACGGATCTCTTGGTTCTG
>OTU_1449	AAGTCGTAACAAGGTTTCCGTAGGTGAACCTGCGGAAGGATCATTAAATGAAAAGCTGGTTTACCAGTATACGGCCCCTGGGTTTGTTTCTGACAAGCGCCAGGATCAGTCGTCATTTATACCCATGTTTTTTGCGTACTACTTGTTTCCTTGGTAGGCTTGCCTACCATTAGGACCACACAAAACCTTTTGTAATTGCAGTCAGCGTCAGAAATAACTTAATAGTTACAACTTTCAACAACGGATCTCTTGGTTCTG
>OTU_145	AAGTCGTAACAAGGTTTCCGTAGGTGAACCTGCGGAAGGATCATTACTGAGTGGCTGGCGCCGCCTCTGCGTTGCGAGAGCGCGCgggggggggAGAGCGGTTACCCGACCTTTTGTCATTTGGGCTGGCGGCTGTTTTCCAGGCTGGGGGCTTCTGGGCTGGGGTTCCCGAGTGGGAGGACCAGACTGGGGGGTTCCAGGGTGGAGACAGGCGGCGGCATGTTCAGGTTCGGCGGAGGAGGCAGGGGCTGGCCGAGGTTGACCGGATGGATGGAAAGATCGATCGGGTTGACTGCGGGAGAGGCGACCTGCCCGCCGCCGGTGGGATTACCAACTCTTTGTTAGCAAGGTGAAGTCTGAGGAAGCAAGAAAACGAAAAAGCAAAACTTTCAACAACGG…
>OTU_1450	AAGTCGTAACAAGGTTTCCGTAGGTGAACCTGCGGAAGGATCATTACCGAGTGCGGCCCCTTCGGGGTGCCAACCTCCCACCCGTGTCTACCGTACCACGTTGCTTCGGCGGGCCCGCCTCCAGCCTTGGGGGCCGCCGTGGGGCTTCCGCCCCCGTGCGAGCGCCCGCCGGAGACCACACGAACGCTGTCTGAAGACTGCCGTCTGAGTGGATTTTCAAATCAGTCAAAACTTTCAACAACGGATCTCTTGGTTCCG
>OTU_1451	AAGTCGTAACAAGGTAACCGTAGGTGAACCTGCGGTTGGATCATTATTAAATGATAGCCAGTTCTCTCTGTTTCGGCAGAGATTGAGCAGGCATTAACCCTTTGTGAACTGTAATTGTACTTGGTAGGTTCATTCTTACCCTCGAAGCTTCGGTGAAGAGAGTGAGAAAGTGCCTACCGCCTTTATACCAACCCCTATATGATTATCTGAAATTGAGTTAATGAGAAACAACTTTTGACAACGGATCTCTTGGCTCTC
>OTU_1452	AAGTCGTAACAAGGTTTCCGTAGGTGAACCTGCGGAAGGATCATTACCGAGTGCGGGTTCTAACGAGCCCAACCTCCCACCCGTGTTTACCGTAACCGTGTTGCCTCGGCGGGCCCACTGGGGCCCAGCCCCGGTCGCCGGGGGGCTTCGTGCCCCCGGGCCCGCGCCCGCCGAAGCACCCTGGAACCCTTTATGAAGAGTGAGTCTGAGCATGAGATTGAATCATTAAAACTTTCAACAACGGATCTCTTGGTTCCG
>OTU_1453	AAGTCGTAACAAGGTCTCCGTTGGTGAACCAGCGGAGGGATCATTAAAGAGTTGCAAAACTCCCAAACCATTGTGGACCTACCTTACAACCGTTGCTTCGGCGGGCGGCGCCGCCCCGGGGGGAGACCCCCGCGGCGCGCCCCTCGGCCCCTCACCGGGCGCCCGCCGGAGGTACCTAACCCTTTACGCATGTATGGCCTCTCTGAGTCTTCTGTACTGAATAAGTCAAAACTTTCAACAACGGATCTCTTGGTTCTC
>OTU_1454	AAGTCGTAACAAGGTTTCCGTAGGTGAACCTGCGGAAGGATCATTATCGTGGGGCTTCGGCCCCGTCGAGATAGCACCCTTGCCTTTATGAGTACCTTGGTTCCCTCCCCCGTACCTTCGGGGAGCGGGAGGGACCTCGTCCGTTTCCCTGTGGCGGCGAAAGCCCCTGGGGACCGCAAAACACGCTGTAACCACCTGCAACCGTCTGATAAACAAACAAAAAAATCAAAACTTTCAACAACGGATCTCTTGGTTCTG
>OTU_1455	AAGTCGTAACAAGGTTTCCGTAGGTGAACCTGCGGAAGGATCATTACCGAGTGCGGCCCCTTCGGGGTGCCAACCTCCCATCCGTGTCTCCGTACCACGTTGCTTCGGCGGGCCCGCCCCCAACCTTGGGGGCCGCCATGGGGCTTCGGCCCCCGTGCGAGCGCCCGCCGGGGACCACACGAACGCTGTCTGAAGACTGCCGTCTGAGTGGATTTCTAAAATCAGTCAAAACTTTCAACAACGGATCTCTTGGTTCCG
>OTU_1456	AAGTCGTAACAAGGTTTCCGTAGGTGAACCTGCGGAAGGATCATTACTGAGTTTTGGGGAAGGTGTCACACGCCTTTCCTCATTTTCTCTTCACCCTTTTGTTTATTTGTACAAGTTGCTTTGGTGGGTGGTTGttttttttACAACCATCTGCCAGACAACTTTTTCAAACACTTTGTTAATAACTACCATCTTATTGTCTAATTTTTACAACTTAAAAAGTATGTAAAACTTTCAACAACGGATCTCTTGGTTCTG
>OTU_1457	AAGTCGTAACAAGGTTTCCGTAGGTGAACCTGCGGAAGGATCATTATCGTGGGGCTTCGGCCCCGTCGAGATAGCACCCTTGCCTTTATGAGTACCTTGGTTCCCTCCCCCGTACCTCCGGGGAGCGGGAGGGGCCTCGTCTGTTTCCCCGGGGGTGACCAAGCCCCCGGGGACCGCAAAACACGCTGTATCCACCTGTAACCGTCTGATAAAACAAACAAAAAATCAAAACTTTCAACAACGGATCTCTTGGTTCTG
>OTU_1458	AAGTCGTAACAAGGTAACCGTAGGTGAACCTGCGGTTGGATCATTATTGATACAACGGTCTTGGAGTCCTCTTCGGAGTTGATTCCTCGACCTTACCTACCCCATGTGCACTGTAATGTTTTTTGGGACTTGTTGATGTATTGTTGCTTATTAAAGCAGCAGTAATAGACGGTCCCAGCAGTATATAAACTCTATATAATTTGTCTGAAATGAACCAAAGAATCGTAACAACTTTTGACAACGGATCTCTTGGCTCTC
>OTU_1459	AAGTCGTAACAAGGTTTCCGTAGGTGAACCTGCGGAAGGATCATTACCGAGTGTAGGGTTCCTAGCGAGCCCAACCTCCCACCCGTGTTTACTGTAACCTTAGTTGCTTCGGCGGGCCCGCCTTTAAGGCCGCCGGGGGGCATCAGCCCCCGGGCCCGCGCCCGCCGGAGACACCACGAACTCTGTCTGATCTAGTGAAGTCTGAGTTGATTGTATCGCAATCAGTTAAAACTTTCAACAATGGATCTCTTGGTTCCG
>OTU_146	AAGTCGTAACAAGGTTTCCGTAGGTGAACCTGCGGAACATTAACAACGTATCCTAAACGTAAAAAACCCCCCCTGTGAACTTTCATAACCCGAGCTTGCTAGGCCCGCGAAATTCCAATCCCTGGTAAATCATTGTTGACCAGCTCTTTGAGTCAGGGATATCCGAACTAGTCGTGTGGATTAAGTTCCGTGAAGCAAGAGCGGTGAGGCAAGTGACCCGGTACCCCCAAGCAATCAATGTTCTGTCGTTGATTGTGTAAGGGTGGCGCAGTAAACGATCGCTGGAGGCCACCACGGCCGGCGACTGGGTCAGCGAGCTCTGCTCCTTAATAACCCCACCTAAGGATTAGCTCGGCGAAAGCTTGAGCACCAAAAACTAATACGACTGTTAACAATGGA…
>OTU_1460	AAGTCGTAACAAGGTTTCCGTAGGTGAACCTGCGGAAGGATCATTACCAAATGTTTCCACATACCACACCTGTGCACTGTACTCGTTGTACCACTGGCGTGCGTCCGTGCTCGCGCGAGACGGCTGGGCCCCGGCCTGGCAGTTGAGTGGGCGACGCGCGGACCCGCCAGTAGTTATCCACGTCCTATTGTCTCGTATACTGAAATGACTTTATTGAAATGATAAAGACAACTTTTAGCAACGGATCTCTAGGCTCTT
>OTU_1461	AAGTCGTAACAAGGTTTCCGTAGGTGAACCTGCGGAAGGATCATTACCGAGTGCGGGTCCCCCGGGGCCCAACCTCCCACCCGTGTTGACCGACCCCTGTTGCTTCGGCGGGCCCGCCTGGGCTTTCCGCCTCGGCCGCCGGGGGGCTTAGCCCCCGGGTCCGCGCCCGCCGAAGACCCCCTGAACGCTGCCTTGAAGGTTGCCGTCTGAGTGATAAATCAATCATTAAAACTTTCAACAACGGATCTCTTGGTTCCG
>OTU_1462	AAGTCGTAACAAGGTCTCCGTTGGTGAACCAGCGGAGGGATCATTACCGAAGTTACTCTTCATACCCATTTGTGAACACTACCCCATTGCCGCGCGTTGCCTCGGCGGTGAGGTCTGCGGTGGGGCCGCGCTCCGGCGCTCCCCACCCCGGGCCCCCGCCGGCCGCGCCGAACTCTTAATTTGCAAAGCGGACTGTACGTTCTGATTAATCTTGAAAAAAACAAGTCAAAACTTTCAACAACGGATCTCTTGGTTCTG
>OTU_1463	AAGTCGTAACAAGGTCTCCGTTGGTGAACCAGCGGAGGGATCATTACGAAAGGAGTACCCCGTACTCTTCAACCCTTTGTGAACATACCATTGTCAGTTGCTTCGGCGGGAGGCCCCTGGGAGGGGCCCCGGGGCCCGGCCGGAGCCGGGCTCCCGCCGGAGGAGCGCAAACCAAACTCTTGCTGTACCCAGTGGCACGTCCGAGTACACAAAACTAAAAACAAGTTAAAACTTTCAACAACGGATCTCTTGGTTCTG
>OTU_1464	AAGTCGTAACAAGGTCTCCGTTGGTGAACCAGCGGAGGGATCATTACGAAAGGAGTATCCGTACTCTTCAACCCTTTGTGAACCTACCATTGTCAGTTGCTTCGGCGGGAGGCCCCTGGGAGGGGCCCCGGGGCCCGGCCTGAGCCGGGCTCCCGCCGGAGGAGCGCAAAACAAACTCTTGTTGTAACCCAGTGGCACGTCCGAGTTaaaacaaaaaaaaaCAAGTTAAAACTTTCAACAACGGATCTCTTGGTTCTG
>OTU_1465	AAGTCGTAACAAGGTCTCCGTTGGTGAACCAGCGGAGGGATCATTACCGAGTTTACAAACTCCCAAACCCCTGTGAACTTATACCTATACGTTGCTTCGGCGGGACTCGCCCCGGCTGCCAACCCGCTCGCGGGGAGGCGGACCGGACCCAGGCGCCCGCCGGAGGACCCAAACTCTTCTGTCTCTCATAGCGGCATGTCTGAGTGGATTTTTATACAAAATGAATCAAAACTTTCAACAACGGATCTCTTGGTTCTG
>OTU_1467	AAGTCGTAACAAGGTCTCCGTTGGTGAACCAGCGGAGGGATCATTATCGAAGTTACTCTTCATACCCATTTGTGAACACTACCCCATTGCCGCGTGTTGCCTCGGCGGTGAGGTCCGCggggggggCTGCGCTACGGCGCTCCCCCCTCCCGGGCCCCCGCCGGCCGCGCCTTACTCTTAATTTGCAAAGCGGACTGTACGATCTGATTAATCTTGATAAACAAGTCAAAACTTTCAACAACGGATCTCTTGGTTCTG
>OTU_1468	AAGTCGTAACAAGGTTTCCGTAGGTGAACCTGCGGAAGGATCATTACCAAATCCAAATCCCAACCCCATGTGAACTAATGTTTGTCTGTCTTTGGGGGTGACACTGGGACAGTGTTTATCGCTTCCCTTTTGCCGCCCCCAAAAGAGTCCGGCACTCCGGTGCTTGGATTCGTGACTAAACCACTTTTAATCTTTTTTGGAATGTACTTTATTAATACTAATAAAGGACAACTTTTAACGGTGGATCTCTTGGCTCGT
>OTU_1469	AAGTCGTAACAAGGTCTCCGTTGGTGAACCAGCGGAGGGATCATTACAGAGTTGAAAACTCACCAAACCATTGTGAACCCTACCAACCGTTGCTTCGGCGGGAGGCTCCCCCGTGTCCCCCGTAACGGGCGGCCGTGGGGCGCCCCTAGACCCCCCGCGGGTGCCCGCCGAAGGAATCCGAAACCCTGTCAGCACACGGCCTCTCTGAGTCTTTTACTGAATAAGTCAAAACTTTCAACAACGGATCTCTTGGCTCTG
>OTU_147	AAGTCGTAACAAGGTTTCCGTAGGTGAACCTGCGGAAGGATCATTAACACGAAATTTTTAATTAAATCTAAAAACCCAAAATGTCAACTTATTATTATTATCCCTAATTAATTATTCgtatatatgtatatataatattgtatatatatatatGCGATTCTTTTTTTAGGCTAACTTTTTATAATTTTATTATAATACCACTTCAATGtttttttttCTAAAAACATTCAACTCTCGTTGTTTCACTCATCATCATCATCATCATCCATATCACTATTTATagtgtgtgtatgtgtgtatgtatgtgtgtatAAAAACATCGattttataaatttaaaattttaaccaattttataatttttttACATAAACAATCTAAGAACAACTCTTAGCAATGGA…
>OTU_1470	AAGTCGTAACAAGGTCTCCGTTGGTGAACCAGCGGAGGGATCATTACAGAGTTACCAACTCACCAAAACCATTGTGAACCCTACCCAACCGTTGCTtcggcgggagccccccgtgtcccccgtaaccgggggccgcggggcggccccggaccccccgCGGGTGCCCGCCGAAGGAATCCGAAACCCTGTCAGCACGTGGCCTCTCTGAGTCTTTTACTGAATAAGTCAAAACTTTCAACAACGGATCTCTTGGCTCTG
>OTU_1471	AAGTCGTAACAAGGTCTCCGTTGGTGAACCAGCGGAGGGATCATTACCGAGTTTACAACTCCCAAACCCCATGTGAACTTATACCCTTTTCCTGTTGCCTCGGCGGGTCATTTGCCCCGGACCGGGCTCGTCCAGAGCCCGCCCGGAAACAGGCGCCCGCCGCGGGACCGAAACTCTGTATCTCTTAGCCTTTGGCACGTCTGAGTGGAATCATACAAAAATGAATCAAAACTTTCAACAACGGATCTCTTGGTTCTG
>OTU_1472	AAGTCGTAACAAGGTCTCCGTTGGTGAACCAGCGGAGGGATCATTACCGAAGTTACTCTTCATACCCTTTTGTGAACACTACCCCATTGCCGCGCGTTGCCTCGGCGGTGAGGTCTGCGGTGGGGCCGCGCTCCGGCGCGGACCCGCCCCGGACCCCCGCCGGCCGCGCCGAACTCTTAATTTGCATAGCGGACTGTACGTTCTGATTATATCTTGAAAAACAAGTCAAAACTTTCAACAACGGATCTCTTGGTTCTG
>OTU_1473	AAGTCGTAACAAGGTTTCCGTAGGTAAGTTATCACAGAACCTCTCATTCTTCATGGAAACAGTGGCTAACATCTCTTCCAGGTGAACCTGCGGAAGGATCATTACAGTGTTAAGGCTTCGGCCTCATTCACACCCCTTGTTGAACCTCTGGTTTCTTTGGCGATGTCATGGACTCGTCAGACTTTAACTCTGATAATGCGATACTGTCCGAGTGAGATTGAATTATTAAAACTTTCAACAACGGATCTCTTGGTTCCA
>OTU_1474	AAGTCGTAACAAGGTTTCCGTAGGTGAACCTGCGGAAGGATCATTAATGAAACTTCAAAGTCGGCTTATGGTTGTTGCTGGTGGGATTCATCTCACATGTGCACGCTGTAGGTCGCAATCCACACACACCTGTGCATCTATGACTCGAGGTTGTAATGACTGAGAGTAACTTTTACACACTCTTGTATGTAACGGAATGTCTTTTTGTGCGATAATGTACAATATAAACAACTTTCAACAACGGATCTCTTGGCTCTC
>OTU_1475	AAGTCGTAACAAGGTCTCCGTTGGTGAACCAGCGGAGGGATCATTACAGAGTTGCAAAACTCCCTAAACCATCGCGAACTCATCCCGTCATCGTTGCTTcggcgggcggccccagggggggccgcagccccggaccggcctccgggcccgggagggggcGCCCGCCGGAGGTATCCACAACTCTTTTGTAACGCAGCGGCATCTCTGAGTAAGCAAGCAAATAAGTCAAAACTTTCAACAACGGATCTCTTGGTTCTG
>OTU_1477	AAGTCGTAACAAGGTTTCCGTAGGTGAACCTGCGGAAGGATCATTACTGAGTGCGGGCTGCCTTCGGGCGCCCAACCTCCCACCCGTGTTTACTGTACCTTAGTTGCTTCGGCGGGCCCGCCATTCATGGCCGCCGGGGGCTCTCAGCCCCGGGCCCGCGCCCGCCGGAGACACCACGAACTCTGTCTGATCTAGTGAAGTCTGAGTTGATTGTATCGCAATCAGTTAAAACTTTCAACAATGGATCTCTTGGTTCCG
>OTU_1478	AAGTCGTAACAAGGTCTCCGTTGGTGAACCAGCGGAGGGATCATTACCGAGTTTACAACTCCCAAACCCAATGTGAACGTTACCAAACTGTTGCCTCGGCGGGATCTTCTGCCCCGGGTGCGTCGCAGCCCCGGACCAAGGCGCCCGCCGGAGGAATCAACCAAAACTCTTATTGTATACCCCCTCGCGGGTTTTTTTATAATCTGAGCAAAAATTCAAAATGAATCAAAACTTTCAACAACGGATCTCTTGGTTCTG
>OTU_1479	AAGTCGTAACAAGGTCTCCGTTGGTGAACCAGCGGAGGGATCATTAAAGAGTTGAAAAACTCCCAAAACCACTGTGGACTTTACCTTTGTCGTTGCTTCGGCGGCGAACGGTCAGGGTGCTCCCTCCTCCTTCCGGAGAGGGGACAACCAGACGCGGGAGCCGCCGGAGGTTACCTGAACTTCGTATTTTTATAGTGCATCTCTGAGTTTAAAAATAAAAACAAGTCAAAACTTTCAACAACGGATCTCTTGGTTCTG
>OTU_1481	AAGTCGTAACAAGGTCTCCGTTGGTGAACCAGCGGAGGGATCATTACCGAAGTTACCTTCAAAACCCACTGTGAACCTTACCTCTTGCCGCGTTGTCTCGGCGGGAGGCGGTGGGCGGTGGGCGTCGCGCGCCCCTAGCGGGCCGTGCCGCTCCCGTCCCCGCCGGCGGCGCCAAACTCTAAATTTACAGCGGACTGTACGTTCTGATTTACaaaaaaaaaCAAGTTAAAACTTTCAACAACGGATCTCTTGGTTCTG
>OTU_1482	AAGTCGTAACAAGGTTTCCGTAGGTGAACCTGCGGAAGGATCATTAACGAATTTCAGGGGTTGTGCTGGTTCTTACAAGTGCACGCCTCTTAATTCATTCACACCCACCGTGCACTTTAAGAGACGTATTTCCCTCGTTCGACGTGCCTTCGTTGGCTTGGGATTTCGTCTGTTTTACACACTCTATTGTATTAGAATGTAATCTAGCGGAAACGCTGAAACGTAATATAACTTTCAACAACGGATCTCTTGGTTCTC
>OTU_1483	AAGTCGTAACAAGGTCTCCGTTGGTGAACCAGCGGAGGGATCATTACCGAAGTTACCTTCAAAACCCACTGTGAACCTTACCTCTTGCCGCGTTGCCTCGGCGGGAGGCGTCGGGGGGGACCGCCGCCGCTCACGCGGAGGCGCCCTCCTCGCCGTCCCCGCCGGCAGCGCCAAAACTCTATTTGCACAGCGGACTGTATGTTCTGATTTACaaaaaaaaaCAAGTTAAAACTTTCAACAACGGATCTCTTGGTTCTG
>OTU_1484	AAGTCGTAACAAGGTCTCCGTTGGTGAACCAGCGGAGGGATCATTACCGAGTTTACAACTCCCAAACCCCGTGTGAACCTTACCTCTCTGTTGCCTCGGCGGGACACGCCCCGGGCGGCCGGCCCAGCGCCGCCAGCCCGGACCCAGGCGCCCGCCGGAGGACCCAAAAACTCTTCTGTTTCCACTAGCGGATTCTTCTGAGTGGCTATAAGcaaaaaaaataaatcaaaaCTTTCAACAATGGATCTCTTGGTTCTG
>OTU_1485	AAGTCGTAACAAGGTTTCCGTAGGTGAACCTGCGGAAGGATCATTACCAAATCCAAATTACCTAACCCCATGTGAACTATTGTTATAGTCTGTCTTTGGGAGAAATTTTCATTAGTTTCTCCCAATAGAGTCCGGCATAACTGTATGGTTGTGTCCAGATTCGAAAAAAACCTTTAAACCACTTGATTTTATGTTGGAATTTTCTTTTATTAATTTTCAATAAAAGACAACTTTTAACGGCGGATCTCTTGGCTCGT
>OTU_1486	AAGTCGTAACAAGGTCTCCGTTGGTGAACCAGCGGAGGGATCATTACTGAGTTACCGCTCTATAACCCTTTGTGAACATACCTAACCGTTGCTTCGGCGGGCAGGGGAAGCCTCTCGCGGGCCTCCCCTCCCGGCGCCGGCCCCCACCACGGGGACGGGGCGCCCGCCGGAGGAAACCAAACTCTATTTACACGACGTCTCTTCTGAGTGGCACAAGCAAATAATTAAAACTTTTAACAACGGATCTCTTGGTTCTG
>OTU_1487	AAGTCGTAACAAGGTTTCCGTAGGTGAACCTGCGGAAGGATCATTATCGTGGGGCTTCGGCCCCGTCGAGATAGCACCCTTGCCTTTATGAGTACCTTGGTTCCCTCCCCCGTACCTCCGGGGAGCGGGAGGGGCCTCGTCTGTTTCCCCGCGGCGGCGAAAGCCCCCGGGGACCACGAAACACGCTGTAACCACCTGTAACCGTCTGATAAACAAACAAAAAATCAAAACTTTCAACAACGGATCTCTTGGTTCTG
>OTU_1488	AAGTCGTAACAAGGTTTCCGTAGGTGAACCTGCGGAAGGATCATTAAATGAAGCAACCTAGGAGCCTGAGATATGGCCACCGGGAACACCTTCCACCCTTTGTTTACTACACTTTGTTGCTTTGGCAGGCCTGCCTTCTAGGCTGCTGGCTCATGCCGGCTCGTGTCTGCCAGAGGACCCTTAAAACTCTGTTTTGTCTGTAGCGTCTGAGTACTATATAATAGTTAAAACTTTCAACAACGGATCTCTTGGTTCTG
>OTU_1489	AAGTCGTAACAAGGTTTCCGTAGGTGAACCTGCGGAAGGATCATTAGCGAATCTGTGCAGCCTCCAAAGGCTCACATTCTCTATCCTTTACACACCTGTGCACCCTTCTGAAGCGGAGAGTTATTAGGCACCCGTGCCGAGCGCCTCCCTTCGGTTTCCACATCAACTTCAAACTACGTTTACTAGAATGTACGCCGTCTTGTTGTAACGACAAGCACAATCCAATAAAACTTTCAGCAACGGATCTCTTGGCTCAG
>OTU_149	AAGTCGTAACAAGGTTTCCGTAGGTGAACCTGCGGAAGGATCATTACAACGTATCCACGTATAAACAAACGCGAACCTCCCGTCTGAGGTAAAAAACCAGGCAGCTGGTCTGAAGTTAACCGGTCGAACTGTAAATCATGTGTTTCGTCGATGGAGTTAGTGTTGCATCAACACTACTGGAGCACTGGTTCTGACCCGGATAAGCCCTCGCGGTAGATCCGAACTTCGTTTACCTCTGACGTGTATCAACCATCGGTCCATATGTACCTTCATTAACCCTTTGTAAAAATTGAACTGAATTTGTAAAGTTTGCGGTTGTCCTTGCTGGCTTCGGTCACGGGCAGCTTAACGCAGCGCTTTACTATTTACGAAATATAAGAACAACTCTTAACAACGGAT…
>OTU_1490	AAGTCGTAACAAGGTTTCCGTAGGTGAACCTGCGGAAGGATCATTACCGAGTGCGGGTTCCAACGAGCCCAACCTCCCACCCGTGTTTACCATGACCGCGTTGCCTCGGCGGGCCCACTGGGGCCTGGCCCCGGTCGCCGGGGGGCTTCTGCCCCCGGGTCCGCGCCCGCCGAAGCGCCCTGGAACCCTGTCTGAATAGTGAGTCTGAGTCGATGATTAAATCATTAAAACTTTCAACAACGGATCTCTTGGTTCCG
>OTU_1491	AAGTCGTAACAAGGTTTCCGTAGGTGAACCTGCGGAAGGATCATTCACAATAAGTGTTTAATGGCACTTTAAATCCATTACCCACCTTGTGTGCACTGTAAGGAGGGGAGCAGGAACGGTCGCGCTACACACGTATAGTGTGCTGCGCCGCCACCCTGCCTCTTTCATTATATATACACGTATTATCTTCTTTCTCGTCTACTTCATTGAGTAATAAAACTCTAATACAACTTTCAACAACGGATCTCTTGGCTCTC
>OTU_1492	AAGTCGTAACAAGGTTTCCGTAGGTGAACCTGCGGAAGGATCATTACCGAGTGCGGGTTCGAATGAGCCCAACCTCCCACCCGTGTCTACCGTTACCGCGTTGCTTCGGCGGGCCCACTGGGGCCTCGCCCCGGTCGCCGGGGGGCTTCTGCCCCCGGGCCCGCGCCCGCCGAAGCGCCCTGGAACCCTGTCTGAACAGTGAGTCTGAGTGTGATATTGAATCATTAAAACTTTCAACAACGGATCTCTTGGTTCCG
>OTU_1493	AAGTCGTAACAAGGTAACCGTAGGTGAACCTGCGGTTGGATCATTAATAAATGAATTGGTTTTATACCAAAACATTGTGTGCAATCATATCTGTCTCTGGTGGTTAATGTTTCTTGTTTCGCTGGATTTTTTACCAGTGGGGCGAGAACGCACTACCACCAATTGAATACACAAACCTTTGTAtttttttttATGTCTGAATCATTCACTTTTGTGCAATGAAAAAACAACTTTTGACAACGGATCTCTTGGCTCTC
>OTU_1494	AAGTCGTAACAAGGTCTCCGTTGGTGAACCAGCGGAGGGATCATTACCGAGTTTACAACTCCCAAACCCCGTGTGAACCATACCTATCTGTTGCCTCGGCGGGAGCCCCGGGCGGCCGGCCCAGCGCCGCCAGCCCGGACCCAGGCGCCCGCCGGAGGACCCCCAAAAAACTCTTCTGTTTCCACTAGCGGATTCTTCTGAGTGGCTATAAGCAAAAAAATAAATCAAAACTTTCAACAATGGATCTCTTGGTTCTG
>OTU_1495	AAGTCGTAACAAGGTCTCCGTTGGTGAACCAGCGGAGGGATCATTAAAGAGTTGCAAAACTCCCAAACCATTGTGGACCTACCTTACAACCGTTGCTTCGGCGGGCGGCGCCGCCCCGGGGGGAGACCCCCGCGGCGCGCCCCTCGGCCCCTCACCGGGCGCCCGCCGGAGGTAAACCAAACTATTGCATTAATGGCCTCTCTGAGTCTTCTGTACTGAATAAGTCAAAACTTTCAACAACGGATCTCTTGGTTCTG
>OTU_1496	AAGTCGTAACAAGGTTTCCGTAGGTGAACCTGCGGAAGGATCATTACCATGGCGCAGAAGGTGGTGGAACATACTGGGTAACCCCAGGAGTTAATCCCTTCACGCTCTTCTACCCTTGTCTATTTGCACCTTTGTCGTTCCCTCGGCGGGTCTTGAACCTGCCGGCGGCAACTTTCAAAACCTCTTGCAGTAGTATCTAATTCTTCTGATTCAATATCAAATTATTACAACTTTCAACAATGGATCTCTTGGTTCTG
>OTU_1497	AAGTCGTAACAAGGTCTCCGTTGGTGAACCAGCGGAGGGATCATTACAGAGCTAACAACTCACCAAACCATCGCGAACCCTACCTCACCGTTGCTTcggcgggaggcccccgcgcccctagcgataggcggccgcggggcgcccctcggcccccccgcggGTGCCCGCCGGAGGAATCCCAAACCCTGTTAGCACGTGGCCTCTCTGAGTCTTTACTGAATAAGTCAAAACTTTCAACAACGGATCTCTTGGTTCTG
>OTU_1498	AAGTCGTAACAAGGTTTCCGTAGGTGAACCTGCGGAAGGATCATTACCGAGTGCGGGTTCTCACGAGCCCAACCTCCCACCCGTGTTTACCGTTACCGCGTTGCCTCGGCGGGCCCACTGGGGCCTGGCCCCGGTCGCCGGGGGGCTTCTGCCCCCGGGCCCGCGCCCGCCGACGCACCCTAGAACCCTGCCTGAATAGTGAGTCTGAGTGAGATTTGAAATCATTAAAACTTTCAACAACGGATCTCTTGGTTCCG
>OTU_1499	AAGTCGTAACAAGGTTTCCGTAGGTGAACCTGCGGAAGGATCATTACCCTTTCATCAGGGGACTGGTGTCAGCGTGCGGGGCTTTTGCTCAGTGCGTTGGCCCAATCCTTTCTGATTCTACCCATGTCTTTTGCGTACTATTTGTTTCCTTGGTGGGCTTGCCCGCCAAAAGGACAAACCAAAACCACTTGTAATTGCAGTCAGCGTCAGTAACAATGTAATAATTACAACTTTCAACAACGGATCTCTTGGTTCTG
>OTU_15	AAGTCGTAACAAGGTTTCCGTAGGTGAACCTGCGGAAGGATCATTAGTGAACGCCCTTCATGGGCTTAAACTATTCCAAACCTCTGTGAACCGTGCCCTTCGGGGCTAATTTTACAAACATGGTGTAATGAACGTCATAACTTTAACAAAACAAAACTTTCAACAACGGATCTCTTGGCTCTCGCATCGATGAAGAACGCAAACAACGGTATCCTCTCTTGGTCATTTAGAGGAAGTAAAAGTCGTAACAAGGTCTCCGTTGGTGAACCAGCGGAGGGATCATTACCGAGTTATACAACTCATCAACCCTGTGAACATACCTAAAACGTTGCTTCGGCGGGAACAGACGGCCCTGTAACAACGGGCCGCCCCCGCCAGAGGACCCCTAACTCTGTTTTT…
>OTU_150	AAGTCGTAACAAGGTTTCCGTAGGTGAACCTGCGGAAGGATCATTAACAACGTATCCTAAACGTAAAAAACCCCCCTAACTTTCATAACCCGAGCTTGCTAGGCCCGCGAAATTCAGCAATCCCTGGTAAATCATTGTTGACCAGCTCTTGGAGTCAGGGATGTCCGAACTAGTCGTGTGGATTAAGTTCCGTGAAGCAAGAGCGGTGAGGCAAGTGACCCGGTACCCCCAAGCAATCAATGTTCTGTCAGTGTCGTTGATTGTGTAAGGGTGGCGCAGTAAACGATCGCTGGAGGGGCCGGCGGGGTCAGCGAGCTCTGCTCCTTAATAACCCCACCTAAGGATTAGCTCGGCGAAAGCTTGAGCACCAAAAACTAATACGACTGTTAACAATGGATA…
>OTU_1500	AAGTCGTAACAAGGTCTCCGTTGGTGAACCAGCGGAGGGATCATTATCGAAGTTACTCTTCATACCCATTTGTGAACACTACCCCATTGCCGCGTGTTGCCTCGGCGGTGAGGTCCGCGGGGGGGCGGCGCTACGGCGCTGCCCCTCCACGAACCCCCGCCGGCCGCGCCTTACTCTTAATTTGCAAAGCGGACTGTACGATCTGATTAATCTTGATAAACAAGTCAAAACTTTCAACAACGGATCTCTTGGTTCTG
>OTU_1501	AAGTCGTAACAAGGTCTCCGTTGGTGAACCAGCGGAGGGATCATTACCGAAGTACTCTTCATACCCTACTGTGAACCTTACCATGTCATTGCAGCGTTGCCTCGGCGCGAGGTCAGGTGGGAGGGGGGGCCCTGCGGCCGCCCCTTCTACCAGGCCCCCGCCGGCATCGCCCAACTCTTCATTTGCAAAGCGGACTGTATATTTCTGATTGTCTTGAAAACAAGTTAAAACTTTCAACAACGGATCTCTTGGCTCTG
>OTU_1502	AAGTCGTAACAAGGTTTCCGTAGGTGAACCTGCGGAAGGATCATTACCGAGTGCGGGCTCCAACGAGCCCAACCTCCCACCCGTGTTTACCGTGACCGCGTTGCCTCGGCGGGCCCACTGGGGCCTGGCCCCGGTCGCCGGGGGGCACCTGCCCCCGGGCCCGCGCCCGCCGAAGCACCCTGAAACCCTGTCTGAATAGTGAGTCTGAGTGAGGGATTGAATCATTAAAACTTTCAACAACGGATCTCTTGGTTCCG
>OTU_1503	AAGTCGTAACAAGGTCTCCGTTGGTGAACCAGCGGAGGGATCATTACAAGAAGCCGAAAGGCTGCTTCAAACCATCGCGAACCCTTCCAACGTTGCCTCGGCGGGCAGGGGTCCTCCCCGGAGGTGCCCCGCGCGCGCCGGTCCGCCTCGGCGGCCCGGCCAGCGCCCGCCGCGGGCCCCAAACTCTGTCTCTCTGTAGGATCTCTGAGTAAAACACAAATAAGTCAAAACTTTCAACAACGGATCTCTTGGTTCTG
>OTU_1504	AAGTCGTAACAAGGTTTCCGTAGGTGAACCTGCGGAAGGATCATTATCGAGCTAGGGTCCTCTGGGCCCGACCTCCAACCCTTGTCTATTCTACCATGTTGCTTCGGCGGGCCCGTCTCTGACCGCCGGGGGCCCCTCTCCGCCCCTGGCCAGCGCCCGTCGGTGGCCCATTTCAAACTCATTTCTAAACGTGATGGTCTGAGCAAAAAGATTTTAAAATCGTTAAAAAACTTTCAACAACGGATCTCTTGGTTCTG
>OTU_1505	AAGTCGTAACAAGGTCTCCGTTGGTGAACCAGCGGAGGGATCATTACCGGGTCTAGCGACTGCCCGAACCAACACACCGTGCATTTATACCAATCTCTTCCGCTGCGGCGGGCCGCCCGCTGGAGGGGCCCCGGGGCCGAAAGGCCGGCCCGCCGAAGCGACTACTGAAAGTACCTCTTGAAGCTCTTCTGAGAGGCGCCGATTTGGCCTTCCTACGAAGGTAATCACAACCCACAGCAATGGATCTCTTGGCTCTG
>OTU_1506	AAGTCGTAACAAGGTTTCCATAGGTGAACCTGCGGAAGGATCATTATCGATTCAAAAAGGATGTGCTGGCCACAAGGCATAAGTGCACTCCGAATCCACATCTCCCTGTGCACTTACTGTGGGTAAATGGGCTTTGTCCCAATTGCTCATGTATTTTTACACTCTTATCATATATCATGAATGTACACAGAGTAGGCTTTGTTTCAAAGCTGAAAAATAAAACAATACAACTTTCAACAATGGATCTCTTGGTTCTC
>OTU_1507	AAGTCGTAACAAGGTTTCCGTAGGTGAACCTGCGGAAGGATCATTACAAATCCATCACGTCTCCTCATCCGAGACCACGTTGAAATGTTCCCCAGTGCGGAGGCGCGCGCAAGTCTTCTGTCGCAAGACGGCTGACTGACGCGCGCTCTCTCGCTGGGCTGATAAACTAGTGTTTCCTTGTTGCTCAATTGTATACTGTCTGAATTCATTCAGATTGAAAACAAGTACAACTTATAACAATGGATCTCTAGGCTCTT
>OTU_1508	AAGTCGTAACAAGGTTTCCGTAGGTGAACCTGCGGAAGGATCATTATTGAATCCTTAGGATGTCGCTGGCCCTTTGCAAAAAGGGCATGTGCACTCCGCCTTTCAATCCACCTGTGCACTTATTGTAGGCTTGTAAGGGGAAACCCTATCAACCTACGTATTTATACACACTATTAAAGTAACAGAATGTAACTTAGTAGACCTTTGATGGTCGAAAACCTAAAATACAACTTTCAACAACGGATCTCTTGGTTCTC
>OTU_1509	AAGTCGTAACAAGGTCTCCGTTGGTGAACCAGCGGAGGGATCATTAAAGAGTTGCAAAACTCCCAAACCATTGTGGACCTACCTTACAACCGTTGCTTCGGCGGGCGGCGCCGCCCCGGGGGGAGACCCCCGCGGCGCGCCCCTCGGCCCCTCACCGGGCGCCCGCCGGAGGTATCTAACTCTTGACAATTGTATGGCCTCTCTGAGTCTTTGTACTTAATAAGTCAAAACTTTCAACAACGGATCTCTTGGTTCTG
>OTU_151	AAGTCGTAACAAGGTTTCCGTAGGTGAACCTGCGGAAGGATCATTAACACGTATCCAACGTTAAAACCCCTGTGAACTTTCAGCCTGCTCTTGTGGCCCGTGTGAAGCAGCAATTCCGGTAAATCAAGTGGGAGGAACAGTTTTGATTCGGAACCTCTGCTCCATATGCGCACGCTGCAATTGAGCGGTAGAAGCAGTGGCATGGCGTCCCCAAGCCTCCAGTGAATGAAAGTGTCACTGGAAAGTGTAAGGATAACGCTTCTCGGTTGCTAGAGGTCGATCACCGACCGGCAGACATGCCACAGGGTCACCGCGCCCCTAATCACTCCCTCTGAACCATACGCCGGCGCCGTTGAAAAGCTGCGCTaaaaaaaaCCGAACAACTGTTAACAATGGATA…
>OTU_1510	AAGTCGTAACAAGGTCTCCGTTGGTGAACCAGCGGAGGGATCATTACCGAGTTTACAACTCCCAAACCCCTGTGAACATACCTATACGTTGCCTCGGCGGGGTCACGCCCCGGGTGCGTCGCAGCCCCGGAACCAGGCGCCCGCCGGAGGGACCAACCAAACTCTTTCTGTAGTCCCCTCGCGGACGTTATTTCTTACAGCTCTGAGCAAAAATTCAAAATGAATCAAAACTTTCAACAACGGATCTCTTGGTTCTG
>OTU_1511	AAGTCGTAACAAGGTCTCCGTTGGTGAACCAGCGGAGGGATCATTAAAGAGTTGCAAAACTCCCAAACCATTGTGGACCTACCTTACAACCGTTGCTTCGGCGGGCGGCGCCGCCCCGGGGGGAGACCCCCGCGGCGCGCCCCTCGGCCCCTCACCGGGCGCCCGCCGGAGGAAACCCAACTCTTGATTATTATGGCCTCTCTGAGTCTTCTGTACTGAATAAGTCAAAACTTTCAACAACGGATCTCTTGGTTCTG
>OTU_1512	AAGTCGTAACAAGGTTTCCGTTGGTGAACCAGCGGAGGGATCATTACAGAGTTGCAAAACTCCCAACCATTGTGAACCTACCTCACCGTTGCTTCGGCGGGTGGCCCCTCCCCCTCACCCGGGTTGGGACCGCGCTGGCTCCCGGCTCCCGGGCGCTGGCAATCCCGTCAAAGGACCTGAACCTTCTGTAATTATTGGCCTCTCTGAGTAACTTATACAATAAGTCAAAACTTTCAACAACGGATCTCTTGGTTCTG
>OTU_1513	AAGTCGTAACAAGGTTTCCGTAGGTGAACCTGCGGAAGGATCATTACCAAATCCAAATCCCAACCCCATGTGAACCTGTGTTTGTCTGTCTTTGGGGGTGGCACTGGGTAAGTGTCATGCTTCCCTTTTGTTGCCCCCAAATGAATCCGGCACTCCGGTGCTTGGGTTCGCTGACTAAACTACTTTTAATATCTTTTGGAATTTCTTATATTAATACTAATATAAGACAACTTTTAACGGTGGATCTCTTGGCTCGT
>OTU_1514	AAGTCGTAACAAGGTTTCCGTAGGTGAACCTGCGGAAGGATCATTACCGAGTGCGGGCCCTCTGGGTCCAACCTCCCATCCGTGTCTCTTGTACCCTGTTGCTTCGGCGGGCCCGCCTTCATGGCCGCCGGGGGGCTTCTGCCCCCGGGCCCGCGCCCGCCGGAGACCCCAACATTGAACACTGTCTGAAGGTTGCAGTCTGAGTTTTCATATAAGAAAAATCGTTAAAACTTTCAACAACGGATCTCTTGGTTCCG
>OTU_1517	AAGTCGTAACAAGGTTTCCGTAGGTGAACCTGCGGAAGGATCATTAATGAAACTTTCAAGTCGGCCGTTCTGTGCTGGTGGCAACACATGTGCACGTCGGTCGCAATCCACACACCTGTGCATCTTTGACTCGAGCACCGTGAAGGGTCTTTGTTGACCTGGTACTCGGGTACTTTACACACTCTGAATGTAATGGAATGTCTTTTTGTACAATGTACAACTAAAAACAACTTTCAACAACGGATCTCTTGGCTCTC
>OTU_1518	AAGTCGTAACAAGGTTTCCGTAGGTGAACCTGCGGAAGGATCATTATCGAGCCGCCGACGCGGGCCCACGGTACTTCGGTGCCGTTGGGTTTCGTAGGCAAATGGCCCAACCCTTGCTTCTTGACAACTATTGTCTCAGCGGCACCGCGCCTTTCGGGGCCAGCTGGACCGCTAGAGAACCATTAAAAATCGTTTATCAGATCGTCTAAGAATGAAATAATTCAATAAAACTTTCAACAACGGATCTCTTGGTTCCG
>OTU_152	AAGTCGTAACAAGGTTTCCGTAGGTGAACCTGCGGAAGGATCATTAACAACGTATCCTAAACGTAAAAAACCCCCCCTGTGAACTTTCATAACCCGAGCTTGCTAGGCCCGCGAAATTCAGCAATCCCTGGTAAATCATTGTTGACCAGCTCTTTGAGTCAGGGATATCCGAACTAGTCGTGTGGATTAAGTTCCGTGAAGCAAGAGCGGTGAGGCAAGTGACCCGGTACCCCCAAGCAATCAATGTGATTGTGTAAGGGTGGCGCAGTAAACGATCGCTGGAGGCCACCACGGCCGGCGACTGGGTCAGCGAGCTCTGCTCCTTAATAACCCCACCTAAGGATTAGCTCGGCGAAAGCTTGAGCACCAAAAACTAATACGACTGTTAACAATGGATAT…
>OTU_1520	AAGTCGTAACAAGGTTTCCGTAGGTGAACCTGCGGAAGGATCATTACCGAGTGTAGGGTTCCTAGCGAGCCCAACCTCCCATCCGTGTCTATTGTACCCTGTTGCTTCGGCGGGCCCGCCGCTTGTCGGCCGCCGGGGGCTCTCAGCCCCGGGCCCGCGCCCGCCGGAGACACCACGAACTCTGTCTGATCTAGTGAAGTCTGAGTTGATTGTATCGCAATCAGTTAAAACTTTCAACAATGGATCTCTTGGTTCCG
>OTU_1522	AAGTCGTAACAAGGTTTCCGTAGGTGAACCTGCGGAAGGATCATTACTGAGTGCGGGCTGCCTCCGGGCGCCCAACCTCCCACCCTTGTCTCTATACACCTGTTGCTTTGGCGGGCCCACCGGGGCCACCTGGTCGCCGGGGGACGCACGTCTCCGGGCCCGCGCCCGCCGAAGCGCTCTGTGAACCCTGATGAAGATGGGCTGTCTGAGTACTGTGAAAATTGTCAAAACTTTCAACAATGGATCTCTTGGTTCCG
>OTU_1524	AAGTCGTAACAAGGTCTCCGTTGGTGAACCAGCGGAGGGATCATTACCGAGTCAGGGTTCTTTTTTAGGCCCGAAACTCCCACCCTTTGTTAAATCTACCCATGTTGCTTCGGCGGGCCCGTCCTCACCGGACCGCTGGAGGCGTCAGCCTCTAGCCAGCGCCCGTCAGTAGCCCACTCAAACCCATTTATCAATTAGTGACGTCTGAGTATAAATCAAATCTTTTAAAACTTTCAACAACGGATCTCTTGGTTCTG
>OTU_1525	AAGTCGTAACAAGGTTTCCGTAGGTGAACCTGCGGAAGGATCATTACCGAGTGCGGCCCCTTCGGGGTGTCAACCTCCCACCCGTGTCTACCGTACCACGTTGCTTCGGCGGGCCCGCCCCCAGCAGGGGGGCCGTCGGGGGGCATCCGCCCCCGGGCGAGCGCCCGCCGGAGACCACACGAACGCTGTCTGAAGACTGCCGTCTGAGTGGATTTTTAAATCAGTCAAAATTTTCAACAACGGATCTCTTGGTTCCG
>OTU_1526	AAGTCGTAACAAGGTTTCCGTAGGTGAACCTGCGGAAGGATCATTACCGAGTGCGGGTTCTAACGAGCCCAACCTCCCACCCGTGTTTACTGTTACCGCGTTGCTTCGGCGGGCCCACTGGGGCCTGGCCCCGGTCGCCGGGGGGCTTCTGCCCCCGGGTCCGCGCCCGCCGAAGCGCCCTGGAACCCTGTCTGAATAGTGAGTCTGAGTGGATATTGAATCATTAAAACTTTCAACAACGGATCTCTTGGTTCCG
>OTU_1527	AAGTCGTAACAAGGTTTCCGTAGGTGAACCTGCGGAAGGATCATTACCGAGTGTAGGGTTCCTAGCGAGCCCAACCTCCCACCCTTGTCTCTATACACCTGTTGCTTTGGCGGGCCCACCGGGGCCACCTGGTCGCCGGGGGACGCACGTCTCCGGGCCCGCGCCCGCCGAAGCGCTCTGTGAACCCTGATGAAGATGGGCTGTCTGAGTACTGTGAAAATTGTCAAAACTTTCAACAATGGATCTCTTGGTTCCG
>OTU_1528	AAGTCGTAACAAGGTTTCCGTAGGTGAACCTGCGGAAGGATCATTCATAATCAAAGTGTTTTTATGGCACTTTTaaaaaaaaTCCATATCCACCTTGTGTGCAATGTCATCTCACTGGAGGCCAGCTGGCTGTCAAAAGCCCGTTTGGTCACCTTTGGGATTTATATCTACTCAGAACTTTAGTGATTTTGTCTGAAAAATATTATGAATAACTTAATTCAAAATACAACTTTCAACAACGGATCTCTTGGCTCTC
>OTU_1529	AAGTCGTAACAAGGTTTCCGTAGGTGAACCTGCGGAAGGATCATTTATGAACCTTTGAGGGTTGAGCTGGCGTTTATTCGCATGTGCTTGCCCTCTCATCCTTTATACACCTGTGCACTTTTGAAGGGAGACATTAGTAGACATTCACTTGTCGAAGGTATCTCCCTTTACACTACATACTCTAATGATTACTTTGAATGTTTAAACGCTTAACAGCATTTAATTACAACTTTTAACAACGGATCTCTTGGCTCTC
>OTU_153	AAGTCGTAACAAGGTTTCCGTAGGATCATTAACAACGTATTTTAAACGTAAAAAACTCCCCCTGTGAACCTTCATAACCCGAGCTTGCTAGGCCCGCGAAATTCAGCAATCCCTGGTAAATCATTGTTGACCAGCTCTTTGAGTCAGGGATATCCGAACTAGTCGTGTGGATTAAGTTCCGTGAAGCAAGAGCGGTGAGGCAAGTGACCCGGTACCCCCAAGCAATCAATGTTCTGTCAGTGTCGTTGATTGTGTAAGGGTGGCGCAGTAAACGATCGCTGGAGGCCACCACGGCCGGCGACTGGGTCAGCGAGCTCTGCTCCTTAATAACCCCACCTAAGGATTAGCTCGGCGAAAGCTTGAGCACCAAAAACTAATACGACTGTTAACAATGGATAT…
>OTU_1530	AAGTCGTAACAAGGTTTCCGTAGGTGAACCTGCGGAAGGATCATTACAGTATATCGGATTCACATTCGTATACCCCACCCTGCGTACCCGACAACCGTTGCTTCCGCGGGACCTGGCTCCGCCACGTCGGccccccccccTCCGGGCTGGTGAGCTCCCGCGGGAGGAAAAGCAATACTCCTTTTTGTCAGTGAATGTCTGTATGAACAGTTTGTAATAAACGTTAAAACTTTCAACAACGGATCTCTTGGTTCTC
>OTU_1531	AAGTCGTAACAAGGTTTCCGTAGGTGAACCTGCGGAAGGATCATTCACAATAAGTGTTTATGGCACTTTCAAATCCATACCCACCTTGTGTGCATTGTAAGGGCCCTTTCAACTCCTCGCTCTCCCTCTCTCCCTTGGGAGGGAGGGGAAGAAGGCAGATTGGGCTTCATTTTCTCACACGTCTTCAATTGCAAGTCTAACATTCAGAGTAATCAAAACTCGAATACAACTTTCAACAACGGATCTCTTGGCTCTC
>OTU_1532	AAGTCGTAACAAGGTCTCCGTTGGTGAACCAGCGGAGGGATCATTACAAGAAGCCGAAAGGCTACTTAAAACCATCGCGAACTCGTCCAAGTTGCTtcggcggcgcgggacccctcgggggaccgcagcgccgcgcccccctccccggggggacgcggggCGCCCGCCGGAGGCCACAAACTCTCATGTATTATAGTGGATCTCTGAGTACGAAACAAATAAGTTAAAACTTTCAACAACGGATCTCTTGGTTCTG
>OTU_1533	AAGTCGTAACAAGGTCTCCGTTGGTGAACCAGCGGAGGGATCATTACCGAGTTATTACTCCAAACCCATTGTGAACCTTACCTTCTATTTCTGTTGCCTCGGCGGCGGCTCCGCTGGCCTCCCTGCCCCGTAATCGGGGGAGGAGCCGGCGCCCCGCCGGCAGCACCAAACTCTTGGAAATTTATAGCGGACTACAAGCTCTGATTACTATAAAGAAAATGAATCAAAACTTTCAACAACGGATCTCTTGGTTCTG
>OTU_1534	AAGTCGTAACAAGGTTTCCGTAGGTGAACCTGCGGAAGGATCATTACCGAGTGCGGGCCCTCTGGGTCCAACCTCCCATCCGTGTCTCTTGTACCCTGTTGCTTCGGCGGGCCCGCCTTTTGGCCGCCGGGGGGCTTCCCGCCCCCGGGCCCGCGCCCGCCGGAGACTCCAACACGAACACTGTCTGAAGGTTGCCGTCTGAGTTTTCATATACGAAAAATCGTTAAAACTTTCAACAACGGATCTCTTGGTTCCG
>OTU_1535	AAGTCGTAACAAGGTCTCCGTTGGTGAACCAGCGGAGGGATCATTACCGAGTTTACAACTCCCAAACCCTTATGTGAACCGTACCTATCGTTGCTTCGGCGGGAACGCCCCGGCGCCCTGCGCCCGGATCCAGGCGCCCTGCGCCCGGATCCAGGCGCCCGCCGGAGACCCCAAACTCTTGTGTTTTTTTCAGTATTCTCTGAGTGGCAAACGCAAAAATAAATCAAAACTTTTAACAACGGATCTCTTGGCTCTG
>OTU_1536	AAGTCGTAACAAGGTTTCCGTAGGTGAACCTGCGGAAGGATCATTATTAATTCTTCTAGTTAAGCGGCTGCGCGTTTTTATTGAACCGCAGCTGTTTTTCTTGTGAACTGGGGCCTGCTTTTGAGGCTTTTACGCTTTTCTGGCAGGCCTGTCGTTAATGCTCTTGTGTTAAttttttgtttttgctttttttGGGCTTAACCGCCTAAGAAAAATAATTACAAGACAACTTTCAGCAATGGATCTCTTGGCTCTT
>OTU_1537	AAGTCGTAACAAGGTTTCCGTAGGTGAACCTGCGGAAGGATCATTAACGAGTGCGGCCCCCTCGGGGTGCCAACCTCCCACCCGTGTCTATTGTACCACGTTGCTTCGGCGGGCCCGCCCCTATCCGTAGGGGCCGTCGGGGGCATTGTCCCCGGGCGTGCGCCCGCCGAGGACCCCACGAACGCTGTCTGAAGACTGCCGTCTGAGTGGATTGATAAATCAGTCAAAACTTTCAACAACGGATCTCTTGGTTCCG
>OTU_1538	AAGTCGTAACAAGGTTTCCGTAGGTGAACCTGCGGAAGGATCATTATTGAATTTTTGAAGGAGCTGTTTGCTGGCCTCTAGCGGGGCATGTGCACGCTCCGTTCAAATCCAACCTTCATACCCCTGTGCACCTTTTGTAGGGTCGTGGCCGCGAGGCTGCGCTCTATGTTCATCATAAACTCTTCAGCATGTGTAGAATGTTCATTGCGTGTAACGCATCTTTATACAACTTTCAGCAACGGATCTCTTGGCTCTC
>OTU_1539	AAGTCGTAACAAGGTTTCCGTAGGTGAACCTGCGGAAGGATCATTACAAATCCATCACGTCTCTTCATCCGAGACCACGTTGAAATGTTCCCCAGGTCAGGTTGCCGCCGTCATCATCACGCTGTGGTGGTGCTGCGCGCCTGGTCTGGGCTGTTAAACTAGTGTTTCCTTGTTGCTCAATTGTATACTGGTGCTCATCTACCCGATGACGCTTGACAACAAAGTACAACTTATAACAATGGATCTCTAGGCTCTT
>OTU_154	AAGTCGTAACAAGGTTTCCGTAGGTGAACCTGCGGAAGGATCATTAACACGTATCCAACGTTAAAACAACCCTGTGAACCTTTAGCGTGCTCTTGCAGCCCATGAAAGCAGCAATCCCTGGTAAATCATTGTTGACTAGCTATTGAGTCAGGGACCTCTGCCGATGAGAAGTTACAGTTGCAATCCGAGCGCTTGCTTAAGTGACCTGGCACCCCCAAGCAATCAGTGTCTGAAAGTGTCATTGATTGTGTAAGGGTGGCGCAGTAAACGATCGCTGGAGGTCCACACGACCGGCGACCGGGTCACCGGGCACTGCCCCTTTACGAACCCCAATGTGTCTGAACCGCTGGTTGGTAACGCGCCAGCACAAAAACCGAACAACTGTTAACAATGGATATC…
>OTU_1540	AAGTCGTAACAAGGTTTCCGTAGGTGAACCTGCGGAAGGATCATTACAGAGTTCATGCCCTCACGGGTAGACCTCCCACCCTTGTGTATCTATACCATGTTGCTTTGGCAGGCTGCTGGCCCCCTCGGGGGACAGCCTCAGCGCCCTCGGGCCTGAGAGTCGCCTGCCGGAGGAAAAACAAACTCTGAACTGTTAGTGTCGTCTGAGTACTATATTTTAATAGTTAAAACTTTCAACAACGGATCTCTTGGTTCTG
>OTU_1541	AAGTCGTAACAAGGTTTCCGTAGGTGAACCTGCGGAAGGATCATTACCGAGTACGGGCCCTCCGTGGCCCCATCTCCCACCCGTGTCGTTGATAACCTGTTGCTTGGGCGGGCCCACCGGGTTCTGCCTGGTCGCCGGGGGGCATCGCCCCCGGGCCCGCGCCCGCCGAAGCACCCTAGGAACTCTGATGAAGATCGGCTGTCTGAGTCTGACGAAAAAATTGTCAAAACTTTCAACAATGGATCTCTTGGTTCCG
>OTU_1542	AAGTCGTAACAAGGTTTCCGTAGGTGAACCTGCGGAAGGATCATTAACAAATCATTGACTTGCAGTGCTTCGTGCACTTGCAAGACATAAACCCGAACCTGCGCAGTAACATGCCAGGCTAGGTGTGGGTCTTTGGACCTGCGGTGAAGCTTGCCTAACGGTTAGCCGATCCACATAGACGCTTGTTTTTGTTTGACAGTTTACAGTTGACACTTTTTAAAAATGACAACTTTTAACAATGGATCTCTTGGCTCTT
>OTU_1543	AAGTCGTAACAAGGTAACCGTAGGTGAACCTGCGGTTGGATCATTACCGATCTATGCCCTGACAAAGGGCTGATCTACACCTGTGAACCGTACTGTGATTGGCAGCGGGGCGCAAGCTCCACGTCAGGCAGACTCCCTGGACTCTGGCTGGCGATGCTGCCGTCTGTCACCAACAACTTACAATTTTGACTGATCTCATCGCGTTCTACGTGATATAAACCAAAAACAACTTTCGACAATGGATCTCTTGGCTCTC
>OTU_1545	AAGTCGTAACAAGGTCTCCGTTGGTGAACCAGCGGAGGGATCATTACAGAGTTTTCACAACTCCCAACCCTTGCGAACCGTACCCATTCTGTTCTCGTTGCTTCCGGCgggggggacgggggggCCCGAAACGGCCTCCCCGCCCCGCCCGCCGGGGGCGGCGGGCCCTACGAACCTTTATATCTCAACCACCAGAAACCGTCTGAGGAAACAAACAAAATAATCAAAACTTTCAACAACGGATCTCTTGGCTCTG
>OTU_1546	AAGTCGTAACAAGGTCTCCGTTGGTGAACCAGCGGAGGGATCATTACAGAGTTATACAACTCCCATACCATCTGTTAACCTACCCAGTTATGCCTCGGCGTAAGCTCGGTTGGAGGCACCTGCAGCTACCCTGTAGTTGCGGACTGCCAACTCCAGCCGCGGCCCGCCGGCGGTACACTAAACTCTGTTTTATTTTATATTCTGAGCGTCTTATTTTAATAAGTTAAAACTTTCAACAACGGATCTCTTGGTTCTG
>OTU_1547	AAGTCGTAACAAGGTTTCCGTAGGTGAACCTGCGGAAGGATCATTACCGAGTGCGGACCCCTCGCGGGTCCAACCTCCCACCCGTGTCTCCTGTATACCCTGTTGCTTTGGCGGGCCCACCGGGTCCCCGGTCGCCGGGGGGCATCGCCCCCGGGCCCGCGCCCGCCAGAGCGCCCTCTGAACCCGATGAAGAAGGACTGTCTGAGTGGAATGAAATAATCATTTAAAACTTTCAACAATGGATCTCTTGGTTCCG
>OTU_1548	AAGTCGTAACAAGGTTTCCGTAGGTGAACCTGCGGAAGGATCATTAAAAGGTTTATCTAGGGGTGGGTAAAACCTCCCTAGAAAACTCCACCCTTGTGTATTATTACTTGTTGCTTTGGTGGGCCGCGAGATTGCCTAGCGATTGAGCACCGGCTTCGGCTGGAGAGCGCCTGCCAGAGGACCAAACTCTGTTATTTTATGTCGTCTGAGTACTATTTAATAGTTAAAACTTTCAACAACGGATCTCTTGGTTCTG
>OTU_1549	AAGTCGTAACAAGGTTTCCGTAGGTGAACCTGCGGAAGGATCATTACCGAGTGCGGGTCCTCCGGGGCCCAACCTCCCACCCGTGTGTACCGTACCCTGTTGCTTCGGCGGGCCCGCCGCAAGGCCGCCGGGGGGCGTGTCCCGCCCCCGGGCCCGCGCCCGCCGGAGACCCTTCGAACGCTGAGCTTTTGAAGGCGTGCCGTCTGAGTCGCGTGAGAAATCGTGAAAACTTTCAACAACGGATCTCTTGGTTCCG
>OTU_155	AAGTCGTAACAAGGTTTCCGTAGGTGAACCTGCGGAAGGATCATTAACAACGTATCCTAAACGTAAAAAACCCCCCCTCTGAACTTTCATATGAGCTTGCTAGGCCCGCGAAATTCAGCAATCCCTGGTAAATCATTGTTGACCAGCTCTTTGAGTCAGGGATATCCGAACTAGTCGTGTGGATTAAGTTCCGTGAAGCAAGAGCGGTGAGGCAAGTGACCCGGTACCCCCAAGCAATCAATGTTCTGTCAGTGAAGGGTGGCGCAGTAAACGATCGCTGGAGGCCACCACGGCCGGCGACTGGGTCAGCGAGCTCTGCTCCTTAATAACCCCACCTAAGGATTAGCTCGGCGAAAGCTTGAGCACCAAAAACTAATACGACTGTTAACAATGGATATC…
>OTU_1551	AAGTCGTAACAAGGTCTCCGTTGGTGAACCAGCGGAGGGATCATTACAGAGTTGCAAAACTCCCAACCATTGTGAACCTACCTCACCGTTGCTTCGGCGGGTGGCCTCTCCCCCTCACCCGGGGTGGGTCCGCGCCGGCCCCGGCTCCCGGGCGCCGGCAATCCCGTCAAAGGACCTGAACTCTTCGTCATCATTGGCCTCTCTGAGTAACTTATACAATAAGTCAAAACTTTCAACAACGGATCTCTTGGTTCTG
>OTU_1552	AAGTCGTAACAAGGTCTCCGTTGGTGAACCAGCGGAGGGATCATTACCGAAGTTACCCTTCAAACCCTTGTGAACCTTACCGCTGCCGCGCTGTTTCCTCGGCGGAGGCGCGGGTCCGGGGCCGCCCCTCAGGGGGTCGTCCCGCCACCCCCGTCCCCGCCGGCAGCGCCAAACTCTTGCTCTGCATAGCGGACTGTATGTTCTGATTTACAATAAAAACAAGTCAAAACTTTCAACAACGGATCTCTTGGTTCTG
>OTU_1553	AAGTCGTAACAAGGTTTCCGTAGGTGAACCTGCGGAAGGATCATTACCGAGTGAGGGCCCCTCGCGGCCCAACCTCCCACCCTTGTCTCCAACACCTGTTGCTTCGGCGGGCCCACCGGGGCCACCCGGTCGCCGGGGGACATCCGTCCCCGGGCCCGCGCCCGCCGAGGCGCTCTGTGAACCCTGATGAAGATGGGCTGTCTGAGTGATATGAAAATTGTCAAAACTTTCAACAATGGATCTCTTGGTTCCGGCA
>OTU_1554	AAGTCGTAACAAGGTCTCCGTTGGTGAACCAGCGGAGGGATCATTAAAGAGTTGCAAAACTCCCAAACCATTGTGGACCTACCTTACAACCGTTGCTTCGGCGGGCGGCGCCGCCCCGGGGGGAGACCCCCGCGGCGCGCCCCTCGGCCCCTCACCGGGCGCCCGCCGGAGGTACCTAACCCTTTACGCATGTATGGCCTCTCTGAGTAACTTATACAATAAGTAAAAACTTTCAACAACGGATCTCTTGGTTCTG
>OTU_1555	AAGTCGTAACAAGGTCTCCGTTGGTGAACCAGCGGAGGGATCATTACCGAAGTTACTCTTCATACCCATTTGTGAACACTACCCCATTGCCGCGCGTTGCCTCGGCGGTGAGGTCCGCGGGGGGGCCGCGCTCCGGCGCTACCCCTCCCGGGCCCCCGCCGGCCGCGCCTTACTCTTAATTTGCAGAGCGGACTGTACGATCTGATTAATCTTGATAAACAAGTCAAAACTTTCAACAACGGATCTCTTGGTTCTG
>OTU_1556	AAGTCGTAACAAGGTCTCCGTTGGTGAACCAGCGGAGGGATCATTATCGAGTTTACAACTCCCAAACCCTTATGTGAACATACCTACTGTTGCTTCGGCGGACTCGCCCCGGCGTCCGGACGGCCTCGCGCCGCCCGCGGCCCGGACCCAGGCGGCCGCCGGAGACCCCCAAACTCTGTATTATCAGCATTTTCTGAATCCGCCGCAAGGCAAAACAAATGAATCAAAACTTTCAACAACGGATCTCTTGGTTCTG
>OTU_1557	AAGTCGTAACAAGGTTTCCGTAGGTGAACCTGCGGAAGGATCATTAAAGAGTAAGGGTGCTCGCCGCCCGACCTCCAACCCTCTGTTGTTAAAACTACCTTGTTGCTTTGGCGGGACCGCTCGGTCTCGAGCCGCAGGGGCTTCGGCCCAGGCGAGCGCCCGCCAGAGTTAAACCAAACTCTTGTTTATATAACCGGTCGTCTGAGCAAAAATTTTGAATAAATCAAAACTTTCAACAACGGATCTCTTGGTTCTC
>OTU_1559	AAGTCGTAACAAGGTTTCCGTAGGTGAACCTGCGGAAGGATCATTACCGAGTGCGGGTCCTTTGGGCCCAACCTCCCATCCGTGTCTATTGTACCCTGTTGCTTCGGCGGGCCCGCCGCTTGTCGGCCGCCGGGGGCTCTCAGCCCCGGGCCCGCGCCCGCCGGAGACCCCAACACGAACACTGTCTGAAAGCGTGCAGTCTGAGTTGATTGAATGCAATCAGTTAAAACTTTCAACAATGGATCTCTTGGTTCCG
>OTU_156	AAGTCGTAACAAGGTTTCCGTAGGTGAACCTGCGGAAGGATCATTAACAACGTATCCCCCCTGTGAACCTTCATAACCCGAGCTTGCTAGGCCCGCGAAATTCAGCAATCCCTGGTAAATCATTGTTGACCAGCTCTTTGAGTCAGGGATCTCCGAACTAGTCGTGTGGATTAAGTTCCGTGAAGCAAGAGCGGTGAGGCAAGTGACCCGGTACCCCCAAGCAATCAATGTTCTGTCAGTGTCGTTGATTGTGTAAGGGTGGCGCAGTAAACGATCGCTGGAGGCCACCACGGCCGGCGACTGGGTCAGCGAGCTCTGCTCCTTAATAACCCCACCTAAGGATTAGCTCGGCGAAAGCTTGAGCACCAAAAACTAATACGACTGTTAACAATGGATATC…
>OTU_1560	AAGTCGTAACAAGGTTTCCGTAGGTGAACCTGCGGAAGGATCATTACCGAGTGAGGGCCCTCTGGGTCCAACCTCCCACCCGTGTTTATCGTACCTTGTTGCTTCGGCGGGCCCGCCTCACGGCCGCCGGGGAGGCCTCGCGCCCCCGGGCCCGCGCCCGCCGAAGACCCCAACATGAACTCTGTTCTGAAAGTATGCAGTCTGAGTTGATTATCATAATCAGTTAAAACTTTCAACAACGGATCTCTTGGTTCCG
>OTU_1562	AAGTCGTAACAAGGTTTCCGTAGGTGAACCTGCGGAAGGATCATTAGTGAATTAAACATGCTTGGTGTCTTCGCTTCGGCAAGGCCCTTGCTTAACTCACATCCCAACACCTGTGAACTGTAAGGCGCATGACTAGGTTCGCCCAAGTCATCGTCTGCCCTTTTTAACAAACAATTAATGTAACAAACGTAGTCTTATTAGGTTAAAGTCTTATTATAACCTAATAAAACTTTCAACAACGGATCTCTTGGCTCTC
>OTU_1563	AAGTCGTAACAAGGTTTCCGTAGGTGAACCTGCGGAAGGATCATTAAAGAGTAAGGGTGCTCAGCGCCCGACCTCCAACCCTTTGTTGTTAAAACTACCTTGTTGCTTTGGCGGGACCGCTCGGTCTCGAGCCGCTGGGGATTCGTCCCAGGCGAGCGCCCGCCAGAGTTAAACCAAACTCTTGTTATTTAACCGGTCGTCTGAGTTAAAATTTTGAATAAATCAAAACTTTCAACAACGGATCTCTTGGTTCTC
>OTU_1564	AAGTCGTAACAAGGTTTCCGTAGGTGAACCTGCGGAAGGATCATTAAATGTTATAGCAACCCTCTGGCTGAAAATGCCAGGGGGCACAACTATACCACCCTTTGTTTATTACACTTTTGTTGCTTTGGTAGGCCAGTCCTCGGACTGCTGGCTTCGGCCGGACAGCGCCTACCAGAGGACCTAAACTCTGTTTGTCTATAATGTCTGAGTACTATATAATAGTTAAAACTTTCAACAACGGATCTCTTGGTTCTG
>OTU_1565	AAGTCGTAACAAGGTTTCCGTAGGTGAACCTGCGGAAGGATCATTACCGAGTTCTGGGGCCCTCGCGGCCCCGCTCTCCCACCCCATGTTTACCGACCTCCGTTGCCTCGGCGGGCCCGCGGGCCCCGCCTGCCGCCGGCCCCTTCGGGGGCGGGTCAGCGCCCGCCTGAGGACCAACCCAACTCTGCGTGAACCAGCCGTCTGAGCACAACGATAAATCAATCAAAACTTTCAACAACGGATCTCTTGGTTCTG
>OTU_1566	AAGTCGTAACAAGGTCTCCGTTGGTGAACCAGCGGAGGGATCATTACCGAGTTTTCAACTCCCAAACCCACTGTGAACATATACCATTTGTTTATTCGTTGCCTCGGCGGGTTCTACCCCCTGGAGACAGGGCGGCCAGCCCCCGCCGGCGTAACACCAAAAACCCTGAATGTGTACCCGTTACACGGCAGTATTACTCTGAGTCACATCATTTTAAATGAATCAAAACTTTCAACAACGGATCTCTTGGTTCTG
>OTU_1567	AAGTCGTAACAAGGTTTCCGTAGGTGAACCTGCGGAAGGATCATTACTGAGTTAGGGTCTTTTTGGCCCGACCTCCAACCCTTTGTTTATTATACCCATGTTGCTTTGGTGGGCCTGCCTTTCGGGGCTGCCGGGGGCATCACCGCCCCTGACCCGTGCCTGCCAGGAGCCTTCTTAAATTCAGTCTTTAACTGTGCTGTCTGAGTCCCAGTATCAAAATATACAAAACTTTCAACAACGGATCTCTTGGTTCTG
>OTU_1568	AAGTCGTAACAAGGTTTCCGTAGGTGAACCTGCGGAAGGATCATTACCGAGTGTAGGGTTCCTAGCGAGCCCAACCTCCCACCCGTGTTTATCGTACCTTGTTGCTTCGGCGGGCCCGCCTCACGGCCGCCGGGGGGCATCCGCCCCCGGGCCCGCGCCCGCCGAAGACACACAAACGAACTCTTGTCTGAAGATTGCAGTCTGAGTACTTGACTAAATCAGTTAAAACTTTCAACAACGGATCTCTTGGTTCCG
>OTU_1569	AAGTCGTAACAAGGTTTCCGTAGGTGAACCTGCGGAAGGATCATTATCGAGTGCGGGTTCTCACGAGCCCAACCTCCCACCCGTGTTTACCGTGACCGCGTTGCCTCGGCGGGCCCACTGGGGCCTGGCCCCGGTCGCCGGGGGGCATCTGCCCCCGGGCCCGCGCCCGCCGACGCACCCTGGAACTCTGTCTGAATAGTGAGTCTGAGTGGGATTGAATCATTAAAACTTTCAACAACGGATCTCTTGGTTCCG
>OTU_157	AAGTCGTAACAAGGTTTCCGTAGGTGAACCTGCGGAAGGATCATTAACAACGTATCCAACGTTAAAACAACCCTGTGAACCTTTAGCGTGCTCTTGCAGCCCATGAAAGCAGCAATCCCTGGTAAATCATTGATGACCAGCTTTTGAGTCAGGGACCTCTGCCGATGAGAAGTTACAGTTGCAATTGAGCGCTTGCTTAAGTGACCTGGCATCCCCAAGCAATCCGTGTCTGAAAGTGTCACTGGTTGTGTAAGGATGGCGCAGTAACGATCGCTGGAGGCCCACACGGCCGGCGACCGGGTCACCGGGCTCACGCCCCTTAACCAACCCCAATGTGTCTGACCCGCTGGTTGGTAACGCTCCAGCACAAAAACCGAACAACTGTTAACAATGGATATC…
>OTU_1570	AAGTCGTAACAAGGTTTCCGTAGGTGAACCTGCGGAAGGATCATTAATGAAACTTTCAAGTCGGCCGTTCTGTGCTGGTGGCAACACATGTGCACGTCGGTTGCAATCCACACACCTGTGCATCTCTGACTCGAGCACCGTGAAGGGTCTTTGTTGACCTGGTACTCGAGTACTTTACACACTCTGAATGTAATGGAATGTCACTGTACAATGTACAACTATAAACAACTTTCAACAACGGATCTCTTGGCTCTC
>OTU_1571	AAGTCGTAACAAGGTTTCCGTAGGTGAACCTGCGGAAGGATCATTATTGAATGAATGTAGAGTTGGTTGTCGCTGGCCCTCTCTGGGCATGTGCACGCCTTCTCTTTCATCCACACACACCTGTGCACTTGTGAGACGGAGGACTTTAATTAGTCTTCCGTCTACTTAATCACACAAACTCATTTAATTAAATTGAATGTAATTGATGTAACGCATCATTAGAACTAAGTTTCAACAACGGATCTCTTGGCTCTC
>OTU_1572	AAGTCGTAACAAGGTTTCCGTAGGTGAACCTGCGGAAGGATCATTCATAATCAAAGTGTTTTTATGGCACTTTTAAAAAAATCCATATCCACCTTGTGTGCAATGTCATCTCACTGGAGGCCAGCGGCTGTAAAAAGCCTGTTTGGTCACCTTTGGGATTTATATCTACTCAGAACTTTAGTGATTTTGTCTGAAAAATATTATGAATAAAAACAATTCAAAATACAACTTTCAACAACGGATCTCTTGGCTCTC
>OTU_1573	AAGTCGTAACAAGGTCTCCGTTGGTGAACCAGCGGAGGGATCATTACAGAGTTGCAAGACTCCCCAAACCATCGCGAACGCTACCTCGACCGTTGCTtcggcgggcggccccgggtttttttcccccgggcgcccctcggcccccgcgcggggcgcccgcCGGAGGTTCCTCAACTCTTGACGCTTGCATGGCCTCTCTGAGTCTTTTGTGTACCAAATTAGTCAAAACTTTCAACAACGGATCTCTTGGTTCTG
>OTU_1574	AAGTCGTAACAAGGTTTCCGTAGGTGAACCTGCGGAAGGATCATTACCGAGTGCGAGCCCTCTGGGCTCAACCTCCCACCCGTGCCGTTATAATACCTGTTGCTTTGGCGGGCCCACTGGGGTCACCTGGTCGCTGGGGGACACCTGTCCCCGGGCCCGCGCCCGCCGAAGCACCCCCTGAACTCTGAAGAAGATAGGGCTGTCTGAGTACCTAGAAAATTGTCAAAACTTTCAACAATGGATCTCTTGGTTCCG
>OTU_1575	AAGTCGTAACAAGGTTTCCGTAGGTGAACCTGCGGAAGGATCATTACCGAGTTCTGGGGTCCCTAGGGCCCCGCTCTCCCACCCCATGTTTACCGACCTCCGTTGCCTCGGCGGGCCCGCGGGCCCTGCCTGCCGCCGGCCCCTTCGGGGGCGGGCCAGCGCCCGCCAGAGGACCAACTCAACTCTGTATGAACCAGTCGTCTGAGCACAACGATAAATAAATTAAAACTTTCAACAACGGATCTCTTGGTTCTG
>OTU_1576	AAGTCGTAACAAGGTCTCCGTTGGTGAACCAGCGGAGGGATCATTACCGAAGTTACTCTTCATACCCATTTGTGAACACTACCCCATTGCCGCGCGTTGCCTCGGCGGTGAGGTCTGCGGTGGGGCCGCGCTCCGGCGCTCCCCACCCGGGCCCCCGCCGGCCGCGCCGAACTCTTAATTTGCAAAGCGGACTGTACGTTCTGATTTACaaaaaaaaaCAAGTTAAAACTTTCAACAACGGATCTCTTGGTTCTG
>OTU_1577	AAGTCGTAACAAGGTTTCCGTAGGTGAACCTGCGGAAGGATCATTAACGAATTATTGAGGTTGTGCTGGTTCTTACAAGTGCACACCTCTTCATTCATTCACACCTGTGCACCCTTAGAGACGTTATTACCCCCGTATACGAAAACCTTAGGGTTAGGGTTAGCGGCTATTACACACACTTTTAAAACATTATGAATGTAATCGCAGTAATGCaaaaaaaaaaTATAACTTTCAACAACGGATCTCTTGGTTCTC
>OTU_1579	AAGTCGTAACAAGGTTTCCGTAGGTGAACCTGCGGAAGGATCATTATCGATTCAAAAAGGATGTGCTGGCCACAAGGCAAAAGTGCACTCCGAATCCACATCTCCCTGTGCACCTACTGTGGGTAAATGGGCTTTGTCCCAATTGCTCATGTTTTTTACACTCTTATCATATATCATGAATGTACATGGAGTAGGCTTCGTTTCAAAGCTGAAAAATAAACAATACAACTTTCAACAATGGATCTCTTGGTTCTC
>OTU_158	AAGTCGTAACAAGGTTTCCGTAGGTGAACCTGCGGAAGGATCATTAACAACATATCCTAACTAAAAAACCCCCCTGTGAACTTTCAACCCCAAATCGCTTGATCCGAGTACCTCAGCAATCTCTGGTAAATCATTGTGAACAGCTTTGAGTCAGAGACCTCTGAATAACCTTGCGCGGTCGCGGTTGGTAAGGCAAGTGACCCGGTACCCTCAAGACCAGTGTTCAATGATCTGTCAGTGTTCATTGATTGTGTAAGGGTGGCGCAGTAAACGATCGCTGGAGGCCACCACGGCCGGCGACTGGGTCAGCGAGCTCTGCTCCTTAATAACCCCACCTAAGGATTAGCTCGGCGAAAGCTTGAGCACCAAAAACTAATACGACTGTTAACAATGGATATC…
>OTU_1580	AAGTCGTAACAAGGTCTCCGTTGGTGAACCAGCGGAGGGATCATTACCGAGTGTAGGGTTCCTAGCGAGCCCAACCTCCCACCCGTGTTTACTGTACCTTAGTTGCTTCGGCGGGCCCGCCGTCATGGCCGCCGGGGGCGTCAGCCCCGGGCCCGCGCCCGCCGGAGACACCACGAACTCTGTCTGATCTAGTGAAGTCTGAGTTGATTGTATCGCAATCAGTTAAAACTTTCAACAATGGATCTCTTGGTTCCG
>OTU_1581	AAGTCGTAACAAGGTCTCCGTTGGTGAACCAGCGGAGGGATCATTACAGAGTTGCAAAACTCCCAAACCATTGTGAACGTTACCTTTAACCGTTGCTTCGGCGGGCGGCTCCGGGATCACTCCCGGGGCCCCTGGGCCCCCCGGCCCCTCGCGGGCGCCCGCCGGAGGTACCCCAAACCATTGATACTTTATGGCCTCTCTGAGTCTTCTGTACTGAATAAGTCAAAACTTTCAACAACGGATCTCTTGGTTCTG
>OTU_1582	AAGTCGTAACAAGGTAACCGTAGGTGAACCTGCGGTTGGATCATTACTAAATGATTTCAATGCTTGGCTCCTGCTAGAGTAATTTTTAGCGGTTGTAGTCCTTGCTATTGAATTTCTAACCATTGTGCACTATAATGTCTTTGGGAGTGCAGTTGAAAGACCGCCTCCCGCCATTTGACCAAACCATTTGATTTTTGTCTGATAGTAATTCGTATGAATTAAATACAACTTTTGGCAACGGATCTCTTGGCTCTC
>OTU_1583	AAGTCGTAACAAGGTTTCCGTAGGTGAACCTGCGGAAGGATCATTCATGTAAGTTGATAGAGTGAAAGCTTCTGGTGCAAGCTAGAAGTCGTAGCTCGATTCATTCTTGCCTAACCATGTGAACTTTAAATGGCGACCTCGTAAGAGTAGAACTCGTTCTAGTCTTGATCAGGCGCTAGGGGCTTTTTAAACCTTTGCTTATTAGTCTAAAACAAAACAAAATCATAACCTTTAACAATGGATCTCTAGGCTCCT
>OTU_1584	AAGTCGTAACAAGGTCTCCGTTGGTGAACCAGCGGAGGGATCATTACCGAGTTTACAACTCCCAAACCCATGTGAACATACCTACTGTTGCTTCGGCGGGGTCACGCCCCGGGTGCGTAAAAGCCCCGGAACCAGGCGCCCGCCGGAGGAACCAACCAAACTCTTTCTGTAGTCCCCTCGCGGACGTATTTCTTACAGCTCTGAGCAAAAATTCAAAATGAATCAAAACTTTCAACAACGGATCTCTTGGTTCTG
>OTU_1585	AAGTCGTAACAAGGTTTCCGTAGGTGAACCTGCGGAAGGATCATTACCATTACCTCAACTGGCGGGTTTTAGCGGTGCTTCGGTGCCACTGACTCCCACCTGTTTGACGTTACCCATGCCTTTTTGCGTACAGTTTGTTTTCCCAGCAGGGCATTACGCCCCTACGGGATATCAATCCACCCATTGTATTTGCAGTCAATGTCTGAAAAATAATAATAATTACAACTTTTAACAACGGATCTCTTGGTTCTGGCA
>OTU_1588	AAGTCGTAACAAGGTAACCGTAGGTGAACCTGCGGTTGGATCATTAACAAAACAGAAGGGTGTCCAAAAGACGCCATTCTAAACACATGTGCACCGTGACTGTCTCTGGTGGGTTAAAATAGCGGTCCGCCGCTAGGCCTGGCACTGCTCTGGACACTGCTGACCACCCACCGTATCCTAGACCTTGTAGTATCTTTGTCTAAATATGTTACATAGCAACAATAACAACTTTTGGCAACGGATCTCTAGGCTCTC
>OTU_1589	AAGTCGTAACAAGGTCTCCGTTGGTGAACCAGCGGAGGGATCATTAAAGAGTAAGGGTGCTCAGCGCCCGACCTCCAACCCTTTGTTGTTAAAACTACCTTGTTGCTTTGGCGGGACCGCTCGGTTCCGAGCCGCTGGGGATTCGTCCCAGGCGAGTGCCCGCCAGAGTTAAACCAAACTCTTGTTATTAAACCGGTCGTCTGAGTTAAAATTTTGAATAAATCAAAACTTTCAACAACGGATCTCTTGGTTCTC
>OTU_159	AAGTCGTAACAAGGTTTCCGTAGGTGAACCTGCGGAAGGATCATTAACACGTATCCAACGTTAAACCCCCTGTGAACTTTCATCGTGCTCTTGCATCCTAGGAACAGCAATCCTGGTAAATCAGTCGCGAAAGTAGTTATTGATTCAGGACCTCTGCCCAAAAGATGTGATTGAGCGCTCGAGGCAAGTGACCTAGCTTCCCCAAGCAATCAGTGTTCTGACAGTGTCACTGACTGTATAAGGATAACGCTTCACGGATGCTGGAGGCCGATCACCGGCCGGCGTCATGGTCACCGGGCTCACGCCCCTTCGAAACAACCAGTAGTTACCGTATGTCTCCTCGACACAGCAAGTGCGCCGTCGCGGGAGAAAAACGAACAACTGTTAACAATGGATATC…
>OTU_1590	AAGTCGTAACAAGGTTTCCGTAGGTGAACCTGCGGAAGGATCATTACAACAAGGTTCCCTGGCCCCCCGAAGCTTCGGCGGAGGGGCGCTACAGCCTGACTTTATACCCACCCTTTGCCTATGTGTACCCCTATTGCTTCCCTCGGCGGGTTCGCCCGCCGACAGGAACCAACTAAACCCTTTGCATTATACATTTAACACTTCCGATACAAAACTAAATTATTACAACTTTTAACAATGGATCTCTTGGTTCTG
>OTU_1591	AAGTCGTAACAAGGTCTCCGTTGGTGAACCAGCGGAGGGATCATTACCGAGTTTTCTACTCCCAAACCCCTGTGAACTTATACCTTTACCGTTGCTTCGGCGGGTTAACGCCCCGGAAAGGCCCCCGAAAGGGAGCCGCCCCGGAACCAGGCGCCCGCCGGGGGACCCAAACTCTTGTATTTTCTTACCTAGCATGTCTGAGTGGAATCATAAACAAATGAATCAAAACTTTCAACAACGGATCTCTTGGTTCTG
>OTU_1592	AAAGTCGTAACAAGGTTTCCGTAGGTGAACCTGCGGAAGGATCATTACCATTACCTCAACAGGCGGGTTTCAGCCGGTGCTTCGGCGCCACTGCTGCCCACCTGCTTGACGTTACCCATGCCTTTTTGCGTACAGTTTGTTTTCCCAGCCGGGCGTTACTGCCCCTACGGGATATCAATCCACCCATTGTATTTGCAGTCCATGTCTGAAAAATAATAATAATTACAACTTTTAACAACGGATCTCTTGGTTCTG
>OTU_1593	AAGTCGTAACAAGGTTTCCGTAGGTGAACCTGCGGAAGGATCATTACCGAGTGAGGGCCCTCTGGGTCCAACCTCCCACCCGTGTTTATCGTACCTTGTTGCTTCGGCGGGCCCGCCTCACGGCCGCCGGGGGGCATCCGCCCCCGGGCCCGCGCCCGCCGAAGACACACAAACGAACTCTTGTCTGAAGATTGCAGTCTGAGTACTTGACTAAATCAGTTAAAACTTTCAACAACGGAGCTCTTGGTTCCGGCA
>OTU_1594	AAGTCGTAACAAGGTTTCCGTAGGTGAACCTGCGGAAGGATCATTACCGAGTGAGGGCCCTCTGGGTCCAACCTCCCACCCGTGTTTATCGTACCTTGTTGCTTCGGCGGGCCCGCCTCACGGCCGCCGGGGGGCATCCGCCCCCGGGCCCGCGCCCGCCGAAGACACACAAACGAACTCTTGTCTGAAGATTGCAGTCTGAGTTGATTGTATCGCAATCAGTTAAAACTTTCAACAATGGATCTCTTGGTTCCG
>OTU_1595	AAGTCGTAACAAGGTTTCCGTAGGTGAACCTGCGGAAGGATCATTACCGAGTGAGGGCCCTCTGGGTCCAACCTCCCACCCGTGTTTACTGTTACCGCGTTGCTTCGGCGGGCCCACTGGGGCCTGGCCCCGGTCGCCGGGGGGCTTCTGCCCCCGGGTCCGCGCCCGCCGAAGCGCCCTGGAACCCTGTCTGAATAGTGAGTCTGAGTGGATATTGAATCATTAAAACTTTCAACAACGGATCTCTTGGTTCCG
>OTU_1596	AAGTCGTAACAAGGTTTCCGTAGGTGAACCTGCGGAAGGATCATTACCGAGTGAGGGCCCTCTGGGTCCAACCTCCCACCCGTGTTTACTGTACCTTAGTTGCTTCGGCGGGCCCGCCATTCATGGCCGCCGGGGGCTCTCAGCCCCGGGCCCGCGCCCGCCGGAGACACCACGAACTCTGTCTGATCTAGTGAAGTCTGAGTTGATTGTATCGCAATCAGTTAAAACTTTCAACAATGGATCTCTTGGTTCCG
>OTU_1597	AAGTCGTAACAAGGTTTCCGTAGGTGAACCTGCGGAAGGATCATTACCGAGTTCATGCCCTTCGGGGTAGATCTCCCACCCTTTGTTTACTATACTATGTTGCTTTGGCGGACCGCCTGATCGCCCCTCGGGGTCTTCAGCTACCGGCTTCGGCTGGTACGTGTCCGCCAGAGGACCCAAAACCCTGAATATTAGTGTCGTCTGAGTAAAAAGTTTAATATTTAAAACTTTCAACAACGGATCTCTTGGCTCTG
>OTU_1598	AAGTCGTAACAAGGTTTCCGTAGGTGAACCTGCGGAAGGATCATTAACAAATAAAGAATCTCATATTCTTAAACCCCAATCTGAGTACTTGTACTTGTTGCTTCCGTGGTTCGTAAGCATTATGCTTGCATCTACCTTCACGGGTGGATCCACGGAAGGTATACTTATATAAACTCTTGTTATTTTGTGGTATCAGTCTGATTATGTTTAAAGAATAAATGTTAAAACTTTCAACAACGGATCTCTTGGTTCTC
>OTU_1599	AAGTCGTAACAAGGTCTCCGTAGGTGAACCTGCGGAGGGATCATTCACATGATTACTTTTATAAACAAACCGTGAACTTTCTATACTATTCTTGTATGTCTTTTTAGATATTACAACGTCATTCGATGAACATTAGATAGCTGGCTCGTTTTTTTATGAAACTTTCTCAGCTGATTATTTGTTAGACTAAACATCTATTCAATACAATCAACCAAACATAGAAACAACTCTATGCCCTGGATATCTTGGTTCTC
>OTU_16	AAGTCGTAACAAGGTTTCCGTAGGTGAACCTGCGGAAGGATCATTAACAACGTATCCTAAACGTAAAAAACCCCCCCTGTGAACTTTCATAACCCGAGCTTGCTAGGCCCGCGAAATTCAGCAATCCCTGGTAAATCATTGTTGACCAGCTCTTTGAGTCAGGGATATCCGAACTAGTCGTGTGGATTAAGTTCCGTGAAGCAAGAGCGGTGAGGCAAGTGACCCGGTACCCTCAAGACCAGTGTTCAATGATCTGTCAGTGTTCATTGACTGGAATCAAACGTTCTGTCAGTGTGCGTTTGATTTGCAAGGGTGGCGCAGTAAACGATCGCTGGAGGCCGACACGGCCGGCGACTGGGTCAGCGAGCTCTGCTCCCACTGTTACTACTTACAAGATTT…
>OTU_160	AAGTCGTAACAAGGTTTCCGTAGGTGAACCTGCGGAAGGATCATTAACACGAAATTTTTAATTAAATCTAAAAAACCCAAAATGTCAACTTATTATtattatccctaattaattattcgtatatataatataattatatatGCGATTCTTTTTTAGGCTAACTTTTTATAATTTTATTATAATACCACTTCAATGttttttttCTTTCTAAAAACATTCAACTCTCGTTGTTTCACtcatcatcatcatcatcatccatatcaCTATTTATAgtgtgtgtatgtgtgtatgtgtgtatatgtgtgtATAAAAACATCGATtttataaatttaaaattttaaccaattttataatttttttaCATAAACAATCTAAGAACAACTCTTAGCAATGGATATC…
>OTU_1600	AAGTCGTAACAAGGTTTCCGTAGGTGAACCTGCGGAAGGATCATTAACAGTGTGCTTTTGTATGCAAATACAAACAACCACTCTCAACCAACCATGTGTGAATCGTTTTGACTGCCAAGTGTGCGGATACCCAGTGAAATGGGTATGGCTGCACACTTTTTTACCCAACAACCACTCTGTCTTGTTAGTGTACTGAATAGTAAAGCTTAGTTGAAAAACTTGCAAAACTTTTAGCAATGGATCTCTAGGCTCTT
>OTU_1601	AAGTCGTAACAAGGTTTCCGTAGGTGAACCTGCGGAAGGATCATTACATCGTTTTGTCGGGGGCCGGCTGGGTATCGCGTATCCACGCTCTATCTGCCGGTTCTGTCTGCACATTACCCCTGTTTTTTGCGTACCTATTGTTTCCTCGGCAGGCTTGCCTGCCAGTAGGACCCTTTTTAAACTCTTTGCATTAGCAGTCAGCGTCAAAAAAATATTAATCGTTATAACTTTCAACAACGGATCTCTTGGTTCTG
>OTU_1602	AAGTCGTAACAAGGTTTCCGTAGGTGAACCTGCGGAAGGATCATTAAACATCATCGGGGGGTTGGATCCAGATTGTCGGGCTTCGGTCTTGCCTTCTGCCCTTCCCTTACTGATTTTACCCATGTCTTTTGCGTACTATTTGTTTCCTTGGTGGGCTTGCCCGCCGATAGGACATCATTAAACCTTTTGTAATTGCAGTCAGCGTCAGAAAAACATAATAATTACAACTTTTAACAACGGATCTCTTGGTTCTG
>OTU_1603	AAGTCGTAACAAGGTTTCCGTAGGTGAACCTGCGGAAGGATCATTATCGTGGGGCTTCGGCCCCGTCGAGATAGCACCCTTGCCTTTATGAGTACCTTGGTTCCCTCCCCCGTACCCTCGGGGAGCGGGAGGGACCTCGTCTGTTTCCCCAACGGTAGCCCCGCGGGGACACGAAACACGCTGTAAACACCTGTAACAGTCTGATAAACAAACCAAAAAAATCAAAACTTTCAACAACGGATCTCTTGGTTCTG
>OTU_1604	AAGTCGTAACAAGGTTTCCGTAGGTGAACCTGCGGAAGGATCATTAACGAGTTAGGGTCTCTTAGGCCCGATCTCCAACCCTTTGTATAAATACCATGTTGCTTTGGCGGGCCCGTCTTTAACCGGACCGCCGAGAGTTGTTTAACCCTTGGCCAGCGTTCGCCAATAGCCCACAATTAAATTCTTTTAACCATGTCAAATCTGAAAACTAGTTAAATAAACTAAAACTTTCAACAACGGATCTCTTGGTTCTG
>OTU_1605	AAGTCGTAACAAGGTCTCCGTTGGTGAACCAGCGGAGGGATCATTACAAGAAGCCGAAAGGCTACTTCAAACCATCGCGAACTCGTCCAAGTTGCTTCGGCGGTGCGGCTACCCCCCCGGGGGTTCCGCGGCGCCGCGCCTCCCCGGAGGTGCGGGGCGCCCGCCGGAGGTCAGAAACTCTTATGTATTATAGTGGCATCTCTGAGTAAAACACAAATAAGTTAAAACTTTCAACAACGGATCTCTTGGTTCTG
>OTU_1606	AAGTCGTAACAAGGTTTCCGTAGGTGAACCTGCGGAAGGATCATTACAGTAGTCGCCCGGGTTGCCGCAAGGCCTCCCGGGTAACCTACCACCCTTTGTTTATTACACTTTGTTGCTTTGGCAAGCCTGCCCTCGGGCTGCTGGCTCCGGCCGGCGAGCGCTTGCCAGAGGACCCCTAACTCTGTTTTTATAATGTTTTTCTGAGTAAACAAGCAAATAAATTAAAACTTTCAACAACGGATCTCTTGGCTCTG
>OTU_1607	AAGTCGTAACAAGGTCTCCGTTGGTGAACCAGCGGAGGGATCATTACCGAGTTGCAAAACTCCCAAACCCACTGTGAACCGAATACCACTGTTGCTTCGGCGGACACGCCCCGGGCGCACCTCCTCACGGGGGTGTGCCCCGGAACCAGGCGCCCGCCGGGGGACCGAAACATTCTGTATTTTCCATTTGAGTACTCTGAGTGTGATTTACAAAATCAAAATTAAAACTTTCAACAACGGATCTCTTGGCTCTA
>OTU_1608	AAGTCGTAACAAGGTTTCCGTAGGTGAACCTGCGGAAGGATCATTAACACTTACCTGCTTTATACTAGCAATAGTATAAATCATGTATAACACAAACCCGCGCTCCTTCTTTTTTTCCACACCATTAACCCTTCttttttttAATTTAATTATATCTTATAACGATCTACAAGATTTAATTCTTGTTGGGTTGCTATATTCATAGTCTAATCTATGTTTAAACACAACTCTTAACAATGGATATCTTGGCTCTC
>OTU_1609	AAGTCGTAACAAGGTCTCCGTTGGTGAACCAGCGGAGGGATCATTACAGAGTTGCAAAACTCCCTAAACCATTGTGAACGTTACCTTCAAACCGTTGCTTCGGCGGGCGGCCCGGGTCCGCCCGGTGCCCCCTGGCCCCTGGCCCCCTTGCGGGGCGCCCGCCGGAGGAAAACCCAACTCTTGATTATTATGGCCTCTCTGAGTCTTCTGTACTGAATAAGTCAAAACTTTCAACAACGGATCTCTTGGTTCTG
>OTU_161	GAGAATCATTCACAATGGGGGAAACCCTGATGGTGCGACGCCGCGTGGGGGAATGAAGGTCTTCGGATTGTAAACCCCTGTCATGTGGGAGCAAATTAAAAAGATAGTACCACAAGAGGAAGAGACGGCTAACTCTGTGCCAGCAGCCGCGGTAATACAGAGGTCTCAAGCGTTGTTCGGAATCACTGGGCGTAAAGCGTGCGTAGGCTGTTTCGTAAGTCGTGTGTGAAAGGCGCGGGCTCAACCCGCGGACGGCACATGATACTGCGAGACTAGAGTAATGGAGGGGGAACCGGAATTCTCGGTGTAGCAGTGAAATGCGTAGATATCGAGAGGAACACTCGTGGCGAAGGCGGGTTCCTGGACATTAACTGACGCTGAGGCACGAAGGCCAGGGGA…
>OTU_1610	AAGTCGTAACAAGGTCTCCGTTGGTGAACCAGCGGAGGGATCATTACCGAAGTTACCCTTCAAAACCCTTTGTGAACGTTACCTCTTGCCGCGTTGCCTCGGCGGGAGGCGTCGGGGACCAGTCGCCGCCTCGCGCGGAGGCCCCCCGCCGTCCCCGCCGGCAGCGCCAAAACTCTATTTGCACAGCGGACTGTATGTTCTGATTTACaaaaaaaaaCAAGTTAAAACTTTCAACAACGGATCTCTTGGTTCTG
>OTU_1612	AAGTCGTAACAAGGTTTCCGTAGGTGAACCTGCGGAAGGATCATTAAAGAAATGATTGGGGGAGCCCGCCTGCGCTTAGCTGCGCGGTGGCGCTCCGCCTCTTACACACAGTGGAGTAATTATTTATTCTTGGGCCGAGCGCAAGCTCAGCTCGCCAAACACAAACAACTATTTTTTACTATACAATGTCATCAAATCTGCTTACGCAGTAACCAAAATATTCAAAACTTTCAACAACGGATCTCTTGGTTCTC
>OTU_1613	AAGTCGTAACAAGGTTTCCGTAGGTGAACCTGCGGAAGGATCATTACCATTACCTCAACTGGCGGGTTTTCAGCGGTGCTTTTGTGCCACTGATGCCCACCTGTTTGACGTTACCCATGCCTTTTTGCGTACAGTTTGTTTTCCCAGCAGGGCGTTACTGCCCCTACGGGATATCAATCCACCCATTGTATTTGCAGTCCATGTCTGAAAAATAATAATAATTACAACTTTTAACAACGGATCTCTTGGTTCTG
>OTU_1614	AAGTCGTAACAAGGTTTCCGTAGGTGAACCTGCGGAAGGATCATTAACAAATCATCATAGTGCTTCGGCGCTATATACACCCCAAGCCTGGGAAGAGCAGCTGATGCTGCTTGGAACGGCTTTGGTTGCGGTCCGCGAGGGCCGCCGGCTAGGGCGCCGCAAGGCAACCTGGCCACATAGACGCTTGCTTGGTTTGACAGAGTTTAGTTGCATCATAACGAATACAACTTTTAACAATGGATCTCTTGGCTCTT
>OTU_1615	AAGTCGTAACAAGGTTTCCGTAGGTGAACCTGCGGAAGGATCATTACCGAGTGAGGGCCCTCTGGGTCCAACCTCCCACCCGTGTTTATTTTACCTTGTTGCTTCGGCGGGCCCGCCTTAACTGGCCGCCGGGGGGCTTACGCCCCCGGGCCCGCGCCCGCCGAAGACACCCTCGAACTCTGTCTGAAGATTGAAGTCTGAGTGAAAATATAAATTATTTAAAACTTTCAACAACGGATCTCTTGGTTCCGGCA
>OTU_1617	AAGTCGTAACAAGGTTTCCGTAGGTGAACCTGCGGAAGGATCATTAAACATCATCGGGGAGTTGGATCCAGATTGTGGGGCTTCGGTCTCGCTTTCTGCCCTTCTCTTACTGATTATACCCATGTCTTTTGCGTACTATTTGTTTCCTTGGTGGGCTTGCCTGCCGATAGGACATCATTAAACCTTTTGTAATTGCAGTCAGCGTCAGAAAAACATAATAATTACAACTTTCAACAACGGATCTCTTGGTTCTG
>OTU_1618	AAGTCGTAACAAGGTTTCCGTAGGTGAACCTGCGGAAGGATCATTACCGAGTGTAGGGTTCCTAGCGAGCCCAACCTCCCACCCGTGTTTACTGTACCTTAGTTGCTTCGGCGGGCCCGCCATTCATGGCCGCCGGGGGCTCTCAGCCCCGGGCCCGCGCCCGCCGGAGACACCACGAACTCTGTCTGATCTAGTGAAGTCTGAGTACTTGACTAAATCAGTTAAAACTTTCAACAACGGATCTCTTGGTTCCG
>OTU_1619	AAGTCGTAACAAGGTCTCCGTTGGTGAACCAGCGGAGGGATCATTACAAGAAGCCGAAAGGCTACTTCAAACCATCGCGAACTCGTCCACGTTGCTTCGGCGGAGCCGGTTCCCCCACGGGGGGCCGCGGTGCCGCGCCTCCCCGGGGGCGCGGGGCCGCCCGCCGGAGGTCACAAACTCTCTCGAATTATAGTGGTATCTCTGAGTAATATACAAATAAGTTAAAACTTTCAACAACGGATCTCTTGGTTCTG
>OTU_162	GGGAATATTGCACAATGGGCGCAAGCCTGATGCAGCGACGCCGCGTGAGGGATGACGGCCTTCGGGTTGTAAACCTCTTTCAGTAGGGAAGAAGCGAAAGTGACGGTACCTGCAGAAGAAGCGCCGGCTAACTACGTGCCAGCAGCCGCGGTAATACGTAGGGCGCAAGCGTTATCCGGAATTATTGGGCGTAAAGAGCTCGTAGGCGGTTTGTCGCGTCTGCCGTGAAAGTCCGGGGCTCAACTCCGGATCTGCGGTGGGTACGGGCAGACTAGAGTGATGTAGGGGAGACTGGAATTCCTGGTGTAGCGGTGAAATGCGCAGATATCAGGAGGAACACCGATGGCGAAGGCAGGTCTCTGGGCATTAACTGACGCTGAGGAGCGAAAGCATGGGGAG…
>OTU_1620	AAGTCGTAACAAGGTTTCCGTAGGTGAACCTGCGGAAGGATCATTAGCAAAAAATCATGGGTAGAGGTTGTGGGGGAAGGAGAGAGGGGGGTTTTAAACTCTTCTCTCTTTATCCACCTAACTCTCTAACCAAAATATTCACTCGGATTGTCTATTATGGACAATCTCGAGAATATATTCACGATTGTATTGTTTGACCGAGTCATGTGACCTTCAATTAAAGATAACTTTTAACAATGGATCTCTTGGCTCTT
>OTU_1621	AAGTCGTAACAAGGTTTCCGTAGGTGAACCTGCGGAAGGATCATTATCGAGTTAGGGTCGTTCTGGCCCAAACTTCCAACCCCTTGTTTATCATTCCATGTTGCTTTGGTGGGCCCGCTCTTTTTGGGGCCGCCGGAGGTTTATCTTACCTCTAGCCCGTGCCCGCCAGTAGCCTTATTAAATGCTTTAACTGTATCGTCTGAGTGGCATTTTAAATCGTTTTAAAACTTTCAACAACGGATCTCTTGGTTCTG
>OTU_1622	AAGTCGTAACAAGGTCTCCGTTGGTGAACCAGCGGAGGGATCATTACGAGAAGCCGAAAGGCTACCTTAAAACCATCGCGAACTCGTCCAAGTTGCTTCGGCGGCGCGGCGCCCCTCACCGGGCGCCGCCGCCCGGCCTCTCCGGAGGTGTGGGCGCGCCCGCCGGAGGTACGAAACTCTCAATGTATTACAGCGGCATCTCTGAGTACAAAGCAAACAAGTTAAAACTTTCAACAACGGATCTCTTGGTTCTG
>OTU_1624	AAGTCGTAACAAGGTCTCCGTTGGTGAACCAGCGGAGGGATCATTACAGAGTTGCAAAACTCCCAACCATTGTGAACCTACCTCACCGTTGCTTCGgcgggcggcgccgccccggggggagacccccgcggcgcgcccctcggcccctcaccgggcgcccGCCGGAGGTACCTAACCCTTTACGCATGTATGGCCTCTCTGAGTCTTCTGTACTGAATAAGTCAAAACTTTCAACAACGGATCTCTTGGTTCTG
>OTU_1625	AAGTCGTAACAAGGTCTCCGTTGGTGAACCAGCGGAGGGATCATTACCGAGTTGCAAAACTCCCAAACCCATTGTGAACCAATACCACTGTTGCTTCGGCGGACACGCCCCGGGCGCACCTCCTCACGGGGGCGTGCCCCGGAACCAGGCGCCCGCCGGGGGACCGAAACCTCTGTATTTACCATTTGAGTACTCTGAGTGTGATTTACaaaaaaaaCAAGTTAAAACTTTCAACAACGGATCTCTTGGTTCTG
>OTU_1627	AAGTCGTAACAAGGTCTCCGTTGGTGAACCAGCGGAGGGATCATTACAGAGTTGCAAAACTCCCTAAACCATTGTGAACGTTACCTTCAAACCGTTGCTTcggcgggcggccccggggtttacccccccgggcgcccctgggccccaccgcgggcgcccGCCGGAGGTCACCAAACTCTTGATAATTTTATGGCCTCTCTGAGTCTTCTGTACTGAATAAGTCAAAACTTTCAACAACGGATCTCTTGGTTCTG
>OTU_1628	AAGTCGTAACAAGGTCTCCGTTGGTGAACCAGCGGAGGGATCATTACAGAGTTGCAAAACTCCCTAAACCATTGTGAACGTTACCTTCAAACCGTTGCTtcggcgggcgggcccgggccccaccgcccggacgccccccccggcccctcgcggggcgcccGCCGGAGGCACCCAAACTCTTGAATATATATGGCCTCTCTGAGTCTTCTGTACTGAATCAGTCAAAACTTTCAACAACGGATCTCTTGGTTCTG
>OTU_1629	AAGTCGTAACAAGGTTTCCGTAGGTGAACCTGCGGAAGGATTATTAACAACATATCCTAACTAAAAAACCCTGTGAACTTTCAACCCCAAATCGCTTGATCCGAGTACCTCAGCAATCTCTGGTAAATCATTGTGAACAGCTTTGAGTCAGAGGCGAGCTTTGCTCCCACTGTTACTACTTACAAGATTTCCCAATTAGTGAAAGCTATTGGGCTATAACTAAACGACTGTTAACAATGGATATCTCGATTCTC
>OTU_163	AAGTCGTAACAAGGTTTCCGTAGGTGAACCTGCGGAAGGATCATTAACACGTATCCAACGTTAAAACCCCTGTGAACTTTCAGCCTGCTCTTGTGGCCCGTATGACGTAGCAATTCCGGTAAATCAAGTGGGAGGAACAGTTTGATTCGGAACCTCTGCCCATACGCGATAAGCTGCAATTGAGCGGTAGAAGCAGTGGCATGGCGTCCCCAAGCCTTCAGTGAATGACAGTGTCACTGAAACGTGTAAGGATAACGCTTCTCGGTTGCTAGAGGTCGATCACCGACCGGCAGACATGTCACAGGGTCACCGCGCCCCTAATCACTCCCTCTGAACAATTGGCGCCCCGATGAAAATCCGGGTGaaaaaaaaCCGAACAACTGTTAACAATGGATATCT…
>OTU_1630	AAGTCGTAACAAGGTTTCCGTAGGTGAACCTGCGGAAGGATCATTACCGAGTGAGGGCCCTCTGGGTCCAACCTCCCACCCGTGTTTATCGTACCTTGTTGCTTCGGCGGGCCCGCCTCACGGCCGCCGGGGGGCATCCGCCCCCGGGCCCGCGCCCGCCGAAGACACACAAACGAACTCTGTTCTGAAAGTATGCAGTCTGAGTTGATTATCATAATCAGTTAAAACTTTCAACAACGGATCTCTTGGTTCCG
>OTU_1633	AAAGTCGTAACAAGGTCTCCGTTGGTGAACCAGCGGAGGGATCATTACCGAGTTTACAACTCCCAAACCCTTTGTGAACCTTACCTTTACGTTGCTTCGGCGGGACCGCCCCGGCGCCCTTCAAAACGGCCCGGAACCAGGCGCCCGCCGGAGGACCCAAACTCTATGTTTCCTTTAGTGGCATTCTCCTCTGAGTGTATTGCGAAAGCAAACAAAATAAATCAAAACTTTCAACAACGGATCTCTTGGTTCTG
>OTU_1634	AAGTCGTAACAAGGTTTCCGTAGGTGAACCTGCGGAAGGATCATTACCGAGTGAGGACCTAACCGGTCCAACCTCCCACCCGTGTCTATCGTACCTTGTTGCTTCGGCGGGCCCGCCATTCGTGGCCGCCGGGGGGCATCTCGCCCCCGGGCCCGCGCCCGCCGGAGACACCAACACGAACACTGTCTGAAGGTTGCAGTCTGAGTCGATTTATTTAATCGTTAAAACTTTCAACAACGGATCTCTTGGTTCCG
>OTU_1635	AAGTCGTAACAAGGTTTCCGTAGGTGAACCTGCGGAAGGATCATTAATTGTATAACGGGGGCCGGCGAGGGATTGCGCACTTCGGTGCGCCTTTCTTCCCCGCCCTGTCTGATACTACCCATGTCTTTTGCGTACCAATTGTTTCCTCGGTGGGCTTGCCCGCCGGTTGGACACTATAAAACCTTTTGTAATTGCAGTCAGCGTCAGAAAAACATAATAATTACAACTTTCAACAACGGATCTCTTGGTTCTG
>OTU_1636	AAGTCGTAACAAGGTCTCCGTTGGTGAACCAGCGGAGGGATCATTACAGAGTTGCAAAACTCCCCAAACCATTGTGAACCTACCCAAAGAACCGTTGCTtcggcgggcggcgcccgggctctcccgggtggccccccggccccccgcgggcgcccgccggAGGATTATACAACACCCTGTTGCTCCGTATGGCCTCTCTGAGTCTCTGTACTTGAATAAGTCAAAACTTTCAACAACGGATCTCTTGGTTCTG
>OTU_1637	AAGTCGTAACAAGGTTTCCGTAGGTGAACCTGCGGAAGGATCATTACCGAGTGCGGGCCCTCGCGGCCCAACCTCCCACCCGTGTCTCTCTCTACCTGTTGCTTTGGCGGGCCCACCGGGGCCACCCGGTCGCCGGGGGACGTCCGTCTCCGGGCCCGCGCCCGCCGAAGCGCCCTGTGAACCCTGATGAAGATGGGCTGTCTGAGTCGCATGAAAATTGTCAAAACTTTCAACAATGGATCTCTTGGTTCCG
>OTU_1638	AAGTCGTAACAAGGTAACCGTAGGTGAACCTGCGGTTGGATCATTAAAAAACTTCGGCAAGAACGTGGAGCTTGTGTGTGAGACTTGTGCGCTAACTTAGACCACAAGTCCCTCACGAGCCCTGTTTTTACGAACCCTGTGTGAACCGTAATATTTATTCCATCCACGTAATACGAAATTTCTAGTCTAAAGTCTTCTTCATATCACGAGAATATGATAAAAACAACTTTTGGCAACGGATCTCTTGGCTCTC
>OTU_1639	AAGTCGTAACAAGGTCTCCGTTGGTGAACCAGCGGAGGGATCATTACCGAGTCTTCGCACTCAAATAACCCTTCTGTGGACCTAAATAAAACCGTTGCCTCGGCGGGCGGCCCCACCTATGGGCCGGACAGCCCGGTCGCCTCCAGGCGCCGGCGCCAGCCGCTGGCCCAAAATAAAAACTCTAGTAACCTTTACCTTCTGAGTTTTAACGCAAATAAAGTCAAAACTTTCAACAACGGATCTCTTGGCTCTG
>OTU_164	GGGAATATTGCACAATGGGCGCAAGCCTGATGCAGCGACGCCGCGTGCGGGATGACGGCCTTCGGGTTGTAAACCGCTTTCAGCAGGGAAGAAGCGCAAGTGACGGTACCTGCAGAAGAAGCGCCGGCTAACTACGTGCCAGCAGCCGCGGTAATACGTAGGGCGCAAGCGTTGTCCGGAATTATTGGGCGTAAAGAGCTCGTAGGCGGTTTGTCGCGTCTGCTGTGAAATCCTCAGGCTCAACCTGGGGCTTGCAGTGGGTACGGGCAGACTAGAGTGCGGTAGGGGTGACTGGAATTCCTGGTGTAGCGGTGGAATGCGCAGATATCAGGAGGAACACCGATGGCGAAGGCAGGTCACTGGGCCGCAACTGACGCTGAGGAGCGAAAGCATGGGGAG…
>OTU_1640	AAGTCGTAACAAGGTTTCCGTAGGTGAACCTGCGGAAGGATCATTACCGAGTGCGGGCCCTCGTGGCCCAACCTCCCACCCTTGTCTCTATACACCTGTTGCTTTGGCGGGCCCACCGGGGCCACCTGGTCGCCGGGGGACATCTGTCCCCGGGCCCGCGCCCGCCGAGGCGCTCTGTGAACCCTGATGAAGATGGGCTGTCTGAGTGATATGAAAATTGTCAAAACTTTCAACAATGGATCTCTTGGTTCCG
>OTU_1641	AAGTCGTAACAAGGTCTCCGTTGGTGAACCAGCGGAGGGATCATTACAGAGTTGCAAAACTCCCCAAACCATTGTGAACCTACCCTCAACCGTTGCTtcggcgggcgggcccgggcctcaccgcccggacgccccccccaggcccctcgcggggcgcccgCCGGAGGTACCCAAACTCTTGAATATATATGGCCTCTCTGAGTCTTCTGTACTGAATCAGTCAAAACTTTCAACAACGGATCTCTTGGTTCTG
>OTU_1642	AAGTCGTAACAAGGTCTCCGTTGGTGAACCAGCGGAGGGATCATTACAGAGTTGCAAAACTCCCACAACCATTGTGAACCTTACCTGAAACCGTTGCTTCGGCGGGCGGGCCCCAGCGGcccccccggcccccccgccccccAGCGGCGTGGGCGCCCGCCGGAGGATACCCAAACTCTTGATACTGTATGGCCTCTCTGAGTCTTCTGTACTGAATAAGTCAAAACTTTCAACAACGGATCTCTTGGTTCTG
>OTU_1643	AAGTCGTAACAAGGTTTCCGTAGGTGAACCTGCGGAAGGATCATTACCGTGCCGGGGGCCCTTCGGGGTCCCATTGTGCCACCCGTGTTTACTTGTACCTGTTGCTTCGGCGGGCCTGCGGGCCTCGCTTGCTGCCGGGGGACCTAGTCCCCGGGCGCGTGCCCGCCGGAGACACACTAAACTTCTCTAACAGATACGTCTGAGCCAAATGATCTAATCATTAAAACTTTCAACAACGGATCTCTTGGTTCCC
>OTU_1644	AAGTCGTAACAAGGTTTCCGTAGGTGAACCTGCGGAAGGATCATTACCGAGTAATTGGGTCGGCGCTCACGCCTCCCGTTCTCCCACCCCATGTTTACTTACCCCTGTTGCCTCGGCGGGCCTGCGGGCCCCGCCTGCTGCTGGCCTCGGCTAGCTAGCGCCCGCCGGAGGACCCATCAAACTCTATTTTAACGTGTCGTCTGAGTAAAACTTTAATAAGTTAAAACTTTCAACAACGGATCTCTTGGTTCTG
>OTU_1645	AAGTCGTAACAAGGTCTCCGTTGGTGAACCAGCGGAGGGATCATTACTGAGTTACCGCTCATCAACCCTTTGTGAACATACCTTAACTGTTGCTTCGGCGGGTAGGCGTCCCCTGAAAAGGACGTCTCCCGGCCCTCTCCCGTCCGCGGGTGGGGCGCCCGCCGGAGGATAACCAAACTCTGATTTAACGACGTTTCTTCTGAGTGACACAAGCAAATAATCAAAACTTTTAACAACGGATCTCTTGGTTCTG
>OTU_1646	AAGTCGTAACAAGGTTTCCGTAGGTGAACCTGCGGAAGGATCATTACCATTACCTCAACTGGCGGGTTTCAATTGTTCTTCGGTTCAATTGACTCCCACCTGTTTGACGTTACCCATGCCTTTTTGCGTACAGTTTGTTTTCCCAGCAGGGCGTTACTGCCCCTACGGGATATCAATCCACCCATTGTATTTGCAGTCAATGTCTGAAAAATAATAATAATTACAACTTTTAACAACGGATCTCTTGGTTCTG
>OTU_1647	AAAAGTCGTAACAAGGTTTCCGTAGGTGAACCTGCGGAAGGATCATTACCGAGTGAGGGCCCTCTGGGTCCAACCTCCCACCCGTGTTTATCATACCTAGTTGCTTCGGCGGGCCCGCCGTCATGGCCGCCGGGGGGCACCCGCCCCCGGGCCCGCGCCCGCCGAAGACCCCCCTGAACGCTGTCTGAAGATTTGCAGTCTGAGCGATTAGCTAAATCAGTTAAAACTTTCAACAACGGATCTCTTGGTTCCG
>OTU_1648	AAGTCGTAACAAGGTCTCCGTTGGTGAACCAGCGGAGGGATCATTAAAGAGTTGAAAGACTCCCAAAACCACTGTGGACTTTACCTTTTATCGTTGCTTCGGCGGTGAACGGGTTTAGGGTGCCCTTTACTTTTTCGGTGGGGGGACCCGACCAGCGAGCCGCCGGAGGTTACCTAAACTTTGTATTTATGTAGTGTATCTCTGAGCATTAAAAAACAAGTCAAAACTTTCAACAACGGATCTCTTGGTTCTG
>OTU_1649	AAGTCGTAACAAGGTCTCCGTAGGTGAACCTGCGGAGGGATCATTACACAATAAACATATGAAGGCTGCACCGCCAACAGGCGGCAAGGCTGGAGTATTTTATTACCCTTGTCTTTTGCGCACTTGTTGTTTCCTGGGCGGGTTCGCCCGCCTCCAGGACCACATGATAAACCTTTTTTATGCAGTTGCAATCAGCGTCAGTACAACAAATGTAAATCATTTACAACTTTCAACAACGGATCTCTTGGTTCTG
>OTU_165	GGGAATATTGCACAATGGGCGCAAGCCTGATGCAGCGACGCCGCGTGAGGGATGACGGCCTTCGGGTTGTAAACCTCTTTCAGTAGGGAAGAAGCGAAAGTGACGGTACCTGCAGAAGAAGCGCCGGCTAACTACGTGCCAGCAGCCGCGGTAATACGAAGGGTGCAAGCGTTACTCGGAATTACTGGGCGTAAAGCGTGCGTAGGTGGTCGTTTAAGTCCGTTGTGAAAGCCCTGGGCTCAACCTGGGAACTGCAGTGGATACTGGGCGACTAGAATGTGGTAGAGGGTAGCGGAATTCCTGGTGTAGCAGTGAAATGCGTAGAGATCAGGAGGAACATCCATGGCGAAGGCAGCTACCTGGACCAACATTGACACTGAGGCACGAAAGCGTGGGGAG…
>OTU_1650	AAGTCGTAACAAGGTTTCCGTAGGTGAACCTGCGGAAGGATCATTACCGAGTGCGGGTCCTTTGGGCCCAACCTCCCATCCGTGTCTCTATACACCTGTTGCTTTGGCGGGCCCACCGGGGCCACCTGGTCGCCGGGGGACGCACGTCTCCGGGCCCGCGCCCGCCGAAGCGCTCTGTGAACCCTGATGAAGATGGGCTGTCTGAGTACTGTGAAAATTGTCAAAACTTTCAACAATGGATCTCTTGGTTCCG
>OTU_1651	AAGTCGTAACAAGGTTTCCGTAGGTGAACCTGCGGAAGGATCATTAACGAGCGCTCTTGCCCTCTGTGGCAGAACCTCCCACCCTGTGCATACCGACCCTTGTTGCTTTGGCAGGCCCGTCCCCTCGGGGACCGCCGGCGCCCCTGCGGCGCGGGCCAGCGCCTGCCAGAGACCTACCAAACTCTGCCATAACATGTCGTCCGAGTCGATTGCAAAATCGTTAAAACTTTCAACAACGGATCTCTTGGTTCTG
>OTU_1652	AAGTCGTAACAAGGTTTCCGTAGGTGAACCTGCGGAAGGATCATTCATAATCAAAGTGTTTTTATGGCACTTTTAAAAAAATCCATATCCACCTTGTGTGCAATGTCATCTCACTGGAAGGTCACGGCTGTAAAAATCCGGCGGCCAACCTTTGGGATTTATATCTACTCAGAACTTTAGTGATTTTGTCTGAAACATATTATGAATAACTTAATTCAAAATACAACTTTCAACAACGGATCTCTTGGCTCTC
>OTU_1653	AAGTCGTAACAAGGTTTCCGTAGGTGAACCTGCGGAAGGATCATTACCGAGTGAGGGCCCTCTGGGTCCAACCTCCCACCCGTGTTTATCGTACCTTGTTGCTTTGGCGGGCCCACCGGGGCCACCTGGTCGCCGGGGGACGCACGTCCCCGGGCCCGCGCCCGCCGAAGCGCTCTGTGAACCCTGATGAAGATGGGCTGTCTGAGTACTATGAAAATTGTCAAAACTTTCAACAATGGATCTCTTGGTTCCG
>OTU_1654	AAGTCGTAACAAGGTCTCCGTTGGTGAACCAGCGGAGGGATCATTATCGAGTTTATCAACTCCCAACCCTATGTGAACCTACCTTTATGTTGCTTCGGCGGTGTCGCGCCGGGTTGCCCCCAGCGGGCTCCCGGGACCACGCGCCCGCCGGAGACCACAAACTCTTGATTTTGCGAAAGCAGTATTCTTCTGAGTGGCCGAAAGGCAAAAAACAAATGAATCAAAACTTTCAACAACGGATCTCTTGGTTCTG
>OTU_1655	AAGTCGTAACAAGGTTTCCGTAGGTGAACCTGCGGAAGGATCATTAACAAATCTGCTATATGGCGAGCTTGCTCGTGCATATATATTTACCCCGAGCTTGGCAGTAATGCCGGCTTTGGTGGGGTGGGGCGCAAGCCCTGCTCCGGTTGTGCGGCGTTAGCGCGTTGCCTACCACATAGACGCTTGTATGTTTGACAGAGTTACAGTTGTAAAACTAAAATGACAACTTTTAACAATGGATCTCTTGGCTCTT
>OTU_1656	AAGTCGTAACAAGGTCTCCGTTGGTGAACCAGCGGAGGGATCATTACAGAGTTGCAAAACTCCCTAAACCATCGCGAACGTACCCGTTACAATTCGTTGCCTCGGTGGGCGGCTCCAGGGCGGAGCCGCAGCTCCCCTTCACGGGGGGCGCCCGCCGTAGGAGACGCATACATAACTCTTTTAATCTCCACGAATCTCTCTGAGTCTTTATACAAATAAGTTAAAACTTTCAACAACGGATCTCTTGGTTCTG
>OTU_1657	AAGTCGTAACAAGGTCTCCGTAGGTGAACCTGCGGAGGGATCATTACAGAGTTCGTGCCCTCACGGGTAGATCTCCCCACCCTTGTGTATCTCCGTATTCTTGTTGCTTTGGCAGGCCGCTGGGCTTCGGCCTGGCCACCGGCTCCTGGGGCTGGTGCGCGCCTGCCAGAGGACCTCTCAAACTCGGTTTGTTACTGTCGTCTGAGTACTATAACAATCGTTAAAACTTTCAACAACGGATCTCTTGGTTCTG
>OTU_1658	AAGTCGTAACAAGGTTTCCGTAGGTGAACCTGCGGAAGGATCATTATCGATTCAAGAGGGATGTGCTGGCTCTCTGGAGCAATTGTGCACTCTTTCAAATCTAATTCTATTCACCTGTGCACACTTGGTAGACAAATAGAAACGGAAACACAGTTTCCATCTATCAGTCTATTGTCTTTATACACACTTTTGAATGCAATGAATGTAATTGAAATAAATATAACAACTTTCAACAATGGATCTCTTGGTTCTC
>OTU_1659	AAGTCGTAACAAGGTTTCCGTAGGTGAACCTGCGGAAGGATCATTACCGAGTTAGGGTCTTATAGGCCCGACCTCCAACCCTTTGTTTACTATACCATGTTGCTTTGGTAGGCCCGCCTTTTGGGGCCGCCGGGGGGCTTATATACCCTTGGTCAGTGCCTACCAGTAGCCTTATATAATTCTTTTATAATTTTTGTTGTCTGAGTATAAATATAAATCGTTAAAACTTTCAACAACGGATCTCTTGGTTCTG
>OTU_166	AAGTCGTAACAAGGTAACCGTAGGTGAACCTGCGGTTGGATCATTACAAAATATTGGATCCTCGGATCTAACTTTGTTTAACTTGTGGGATTTTCGTTGGAACTCTGCTTGTGGGTGTGCTGGTTGATTGTCTGGTCAGCTTGGTTAGAGCTTGATGGATGCGTACGATGGATGCTTCCGTGCTCCTTAAATGAAGCCAGTGAGCCTTAAGTCGTTACCTATCCTAAGGCTCTGCCAATATGTGGTCGGACATTGGTCAGTTTGCCCTTTAGTGGTTTTCATCACAACGGACTTCTCTCTGTTAAACCTCTTTGCTTCACCAAACTCTTTGTGTTTTATCTAGTCTGAAATCATTCACCCTGGTGAAATGAAAAAACAACTTTTGACAACGGATCTCTT…
>OTU_1660	AAGTCGTAACAAGGTCTCCGTTGGTGAACCAGCGGAGGGATCATTACGAGAAGCCGAAAGGCTACTTAAAACCATCGCGAACTCGTCCAAGTTGCTTCGGCGGCGCGGGGCCCCTCACAGGGCGCCGCGGCCCGGCCTCTCCGGAGGTTGTGGGCGCCCGCCGGAGGTACGAAACTCCTCATGTATTACAGCGGCATCTCTGAGTACGAAGCAAAACAAGTTAAAACTTTCAACAACGGATCTCTTGGCTCTG
>OTU_1661	AAGTCGTAACAAGGTTTCCGTAGGTGAACCTGCGGAAGGATCATTACCGAGTGCGGGCCCTCTGGGTCCAACCTCCCACCCGTGTTTATCGTACCTTGTTGCTTCGGCGGGCCCGCCGCAAGGCCGCCCGGGGGGCTTCTGCCCCCCCGGGCCCGCGCCCGCCGGAGACACCTGTGAACGCTTTTGTGAAGATTGCAGTCTGAGCGATTAGCTAAATCGGTTAAAACTTTCAACAACGGATCTCTTGGTTCCG
>OTU_1662	AAGTCGTAACAAGGTCTCCGTTGGTGAACCAGCGGAGGGATCATTACAGAGTTGCAAAACTCCCCAAACCATCGTGAACCTTTACCGCTAAACAGTTGCTTCGGCGGGTGGCCAGGGGGCGCGCGCAAGCCCGCCCCCGGCCGCCGAGCCCGCCGGAGGAATCCAAAAAAACCATCGCTTTCAGTACCGGCCTCTCTGAGTTACTGTACTTTTAATTAAGTCAAAACTTTCAACAACGGATCTCTTGGTTCTG
>OTU_1663	AAGTCGTAACAAGGTTTCCGTAGGTGAACCTGCGGAAGGATCATTAACGAATTGGGTCGCAAGACCCTAATTCCATCCCACACCTTTTGTGAACTGTTATGGTTATCTTTGGCGGGGCCGTTCTATGAAAATAGGGCGCTCCGATATGAGGAGAGTCCCCGCCAGAGGTTTTTATTCAAACGTGTTTTATTGAAAGTCAGAAAGTCTATATTTTAAATATATAAAACTTTTAGCAACGGATCTCTTGGCTCTC
>OTU_1664	AAGTCGTAACAAGGTTTCCGTAGGTGAACCTGCGGAAGGATCATTACTGAGTGCGGGCTGCCTCCGGGCGCCCAACCTCCCACCCGTGTTTATCGTACCTTGTTGCTTCGGCGGGCCCGCCTCACGGCCGCCGGGGGGCTTCTGCCCTCTGGCCCGCGCCCGCCGAAGACACCATTGAACGCTGTCTGAAGATTGCAGTCTGAGCAATTAGCTAAATAAGTTAAAACTTTCAACAACGGATCTCTTGGTTCCG
>OTU_1665	AAGTCGTAACAAGGTTTCCGTAGGTGAACCTGCGGAAGGATCATTACCGAGTGCGGGCCCTCGCGGCCCAACCTCCCACCCTTGTCTCTCTACACCTGTTGCTTTGGCGGGCCCACTGGGGCTCCCTGGTCGCCGGGGGACACCCGTCCCCGGGCCCGCGCCCGCCGAAGCGCTTCGTGAACCCTGATGAAGAAGGGCTGTCTGAGTACTATGAAAATTGTCAAAACTTTCAACAATGGATCTCTTGGTTCCG
>OTU_1666	AAGTCGTAACAAGGTCTCCGTTGGTGAACCAGCGGAGGGATCATTACTGAGTTACCGCTCTATAACCCTTTGTGAACATACCTAACTGTTGCTTCGgcgggcagggggtcccctcggggacgccctcccggccccgccccccacccggggcggggcgcccGCCGGAGGATAACCAAACTCTGTTTTAACGACGTTTCTTCTGAGTGGCACAAGCAAATAATTAAAACTTTTAACAACGGATCTCTTGGTTCTG
>OTU_1667	AAGTCGTAACAAGGTCTCCGTTGGTGAACCAGCGGAGGGATCATTACCGAGTGCGGGCCCTCGCGGCCCAACCTCCCACCCTTGTCTCTATACACCTGTTGCTTTGGCGGGCCCACCGGGGCCACCTGGTCGCCGGGGGACGCACGTCTCCGGGCCCGCGCCCGCCGAAGCGCTCTGTGAACCCTGATGAAGATGGGCTGTCTGAGTACTGTGAAAATTGTCAAAACTTTCAACAACGGATCTCTTGGTTCTG
>OTU_1668	AAGTCGTAACAAGGCCTCCGTTGGTGAACCAGCGGAGGGATCATTAAAGAGTTGCAAAACTCCCTAAAACCCCTGTGAACTTATCCTTGAGCGTTGCTTCGGCGGGCAGCCCCTCCCTGGGGCCGCAGCCCAATCCCCCTTCCGGGGGGGTGCGGGCGCCCGCCGGAGGTATTAAACTCTTCTGTATTTTAGCGGCATCTCTGAGTTAGCAAGTAATAAGTCAAAACTTTCAGCAACGGATCTCTTGGTTCTG
>OTU_1669	AAGTCGTAACAAGGTCTCCGTTGGTGAACCAGCGGAGGGATCATTACAGAGTCGCAATACTCCGTAAACCATTGTGAACGTTACCTTAACCGTTGCTTcggcgggcggcgcccgggcctcaccgcccgcggcgcccccccggccccccgtgggcgcccgcCGGAGGTACACCAAACTCTTGCATTGTATGGCCTCTCTGAGTAATTCTGTACTGAATAAGTCAAAACTTTCAACAACGGATCTCTTGGTTCTG
>OTU_167	AAGTCGTAACAAGGTAACCGTAGGTGAACCTGCGGTTGGATCATTAAAATTTTGCCTGAAGGGGGGTTTGACTTGTTTGTGTAATTGTTACAATGGGAGCACGGGAGCGTCCGATGTGCAATGGAGGAAAGGTAGGAAGCATGTCGGACTCCACCTGCTTTTCGGATCCGGAAGTGGTCTTTGCACACCACTCCCCAACGCAGGCGGAACCACCGCGGGGGTGATGGGTTGGGAGGTCGTTCCAATCGCATTGGGGAGGGCCACTCGGGAGTCTTCCCTGATCCCAATCAATTATGCATTCAAATTTTGCCCCCACCtttttcatttttttCGGTTGCTCTGTCTGAAACttttttttCTGTACGCAAAGTACGAACAACTTTTGGCAACGGATCTCTT…
>OTU_1670	AAGTCGTAACAAGGTTTCCGTAGGTGAACCTGCGGAAGGATCATTACCGAGTGAGGGCCCCTCGCGGCCCAACCTCCCACCCTTGTCTCCAACACCTGTTGCTTCGGCGGGCCCACCGGGGCCACCCGGTCGCCGGGGGACGCACGTCTCCGGGCCCGCGCCCGCCGAAGCGCTCTGTGAACCCTGATGAAGATGGGCTGTCTGAGTACTGTGAAAATTGTCAAAACTTTCAACAATGGATCTCTTGGTTCCG
>OTU_1671	AAGTCGTAACAAGGTTTCCGTAGGTGAACCTGCGGAAGGATCATTAGAGAAAGAGAGATTTATTCCTTTATTCTTTACGAGTGGTTGGGGTTGACTGGTGGTTGGGCAAGCCCAACCATGAGGAAGCCCAACCGTGAGTAAACAGGTCGCGTCGACCTTAAATTCCCTGGTGGTTGGGCTCGCCCAACCATGACTAAAAACTTACACAACACACACACATGTGCACCTTGCCGCAATGGATCTCTCGGCTCTT
>OTU_1672	AAGTCGTAACAAGGTTTCCGTAGGTGAACCTGCGGAAGGATCATTATTGAATCCAAAGGATGTTGCTGGCCTTTCGGGGCATGTGCACTCCACCTTTTCAATACACCTGTGAACTTATTGTGGGTGCAGATGTAAAAAGTCTGTTGCCTATGTTTTTAATACACCCCTAAAAAAGTCTATTGAATGTCTAATTGTGGCCTTTAACGGTCAACAAAACTTAATACAACTTTCAACAATGGATCTCTTGGTTCTC
>OTU_1673	AAGTCGTAACAAGGTCTCCGTTGGTGAACCAGCGGAGGGATCATTACAAGAAGCCGAAAGGCTACTTAAAACCATCGCGAACTCGTCCAAGTTGCTTCGGCGGCGCGGGACCCCTCGGGGGACCGCAGCGCCGCTcccccccccGGGGGTTGCGGGGCGCCCGCCGGAGGTCACAAACTCTCATGTATTATAGTGGATCTCTGAGTAAAAAACAAATAAGTTAAAACTTTCAACAACGGATCTCTTGGTTCTG
>OTU_1674	AAGTCGTAACAAGGTCTCCGTTGGTGAACCAGCGGAGGGATCATTAAAGAGTTGCAAAACTCCCAAACCATTGTGAACATACCTTCAACGTTGCTTCGGCGGGTTGGCCCCGGTCTCCGGGGTCCCCGGCCTCCGGGGTCCCCGGCCCTACTCGGGCGCCCGCCGGAGGTATCTAACTCTTGAACTTTTATGGCCTCTCTGAGTCTTTGTACTTAATAAGTCAAAACTTTCAACAACGGATCTCTTGGTTCTG
>OTU_1675	AAGTCGTAACAAGGTTTCCGTAGGTGAACCTGCGGAAGGATCATTACCGAGTGAGGGTCTCTCAGGCCCGACCTCCCACCCTGTGTTTTTGTGACCTTGTTGCTTTGGCGGGCCCGCCTCGACGAGAGGCCGCCGGAAGCTCACCGCTTTGGGCCCGTGCCCGCCAGTAGCCCTCTTAAATTCTTAATAAACCTGTCGTCTGAATCCATGAATATAATaaaaaaaaCTTTCAACAACGGATCTCTTGGTTCTG
>OTU_1676	AAGTCGTAACAAGGTCTCCGTTGGTGAACCAGCGGAGGGATCATTACAGAGTTGCACAACTCACCAAACCACTGCGAACCCTACCCAACCGTTGCTTCGGCGGGCGGCGCCCATCGGCCCTGCGGCCGCTAGGGCGCCCCTGGCCCCACCGCGGGCGCCCGCCGGAGGATATCCAAACACTTTGATAGAACGTGGCCTCTCTGAGTACAGACGAAACAAGTCAAAACTTTCAACAACGGATCTCTTGGTTCTG
>OTU_1678	AAGTCGTAACAAGGTTTCCGTAGGTGAACCTGCGGAAGGATCATTACCGAGTAACTGGGTTGGCGCTCGCGCCTCCCGTTCTCCCACCCCATGTTTACTTACTCTTGTTGCTTCGGCGGGCCTACGGGTGCCGCCCGCGGCTGGCCTTAGCTAGCTAGCGCCCGCCGGAGGACCCACTAAACTCTATTTTAACGTGTCGTCTGAGCAAAACTTTAATGAGTTAAAACTTTCAACAACGGATCTCTTGGTTCTG
>OTU_1679	AAGTCGTAACAAGGTCTCCGTTGGTGAACCAGCGGAGGGATCATTACCGAAGTTACCTTCAAAACCCACTGTGAACCTTACCTCTTGCCGCGTTGTCTCGGCGGGAGGCGGTGGGCGTCGCGCGCCCCTAGCGGGCCGTGCCGCTCCCGTCCCCGCCGGCGGCGCCAAACTCTAAATTTACAGCGGACTGTACGTTCTGATTTACaaaaaaaaaaCAAGTTAAAACTTTCAACAACGGATCTCTTGGTTCTGG
>OTU_1682	AAGTCGTAACAAGGTTTCCGTAGGTGAACCTGCGGAAGGATCATTACTGAGTTCATGCCCTAACGGGTAGATCTCCCACCCTTGTCTCTATACACCTGTTGCTTTGGCGGGCCCACCGGGGCCACCTGGTCGCCGGGGGACGCACGTCCCCGGGCCCGCGCCCGCCGAAGCGCTCTGTGAACCCTGATGAAGATGGGCTGTCTGAGTACTATGAAAATTGTCAAAACTTTCAACAATGGATCTCTTGGTTCCG
>OTU_1683	AAGTCGTAACAAGGTCTCCGTTGGTGAACCAGCGGAGGGATCATTACCGAGTTGCAAAACTCCCAAACCCATTGTGAACCAATACCACTGTTGCTTCGGCGGACACGCCCCGGGCGCACCTCCTCACGGGGGCGTGCCCCGGAACCAGGCGCCCGCCGGGGGGACCGAAACCTCTGTATTTACCATTTGAGTACTCTGAGTGTGATTTACAAAATCAAAATTAAAACTTTCAACAACGGATCTCTTGGCTCTA
>OTU_1684	AAGTCGTAACAAGGTCTCCGTTGGTGAACCAGCGGAGGGATCATTACAGAGTTGCAAAACTCCCTAAACCATTGTGAACGTTACCTAAACCGTTGCTTCGGCGGGCGGCCCCCGGGGTTCTCGGACCCCGGGCGCCCCTGGGCCCCACCGCGGGCGCCCGCCGGAGGTCACCAAACGCTTGATAATTCATGGCCTCTCTGAGTCTTCTGTACTGAATAAGTCAAAACTTTCAACAACGGATCTCTTGGTTCTG
>OTU_1685	AAGTCGTAACAAGGTCTCCGTTGGTGAACCTGCGGAAGGATCATTACCGAGTGAGGGCCCCTCGCGGCCCAACCTCCCACCCTTGTCTCCAACACCTGTTGCTTTGGCGGGCCCACCGGGGCCACCTGGTCGCCGGGGGACATCTGTCCCCGGGCCCGCGCCCGCCGAAGCGCTCTGTGAACCCTGATGAAGATGGGCTGTCTGAGTACTATGAAAATTGTCAAAACTTTCAACAATGGATCTCTTGGTTCCG
>OTU_1686	AAGTCGTAACAAGGTTTCCGTAGGTGAACCTGCGGAAGGATCATTACCGAGTGTAGGGTTCCTAGCGAGCCCAACCTCCCACCCGTGTTTATTGTACCTTGTTGCTTCGGCGAGCCCGCCTCACGGCCGCCGGGGGGCACTCGCCCCCGGGCCCGCGCCCGCCGAAGACACCATTGAACTCTGTCTGAAGATTGCAGTCTGAGTAGATTAGCTAAATCAGTTAAAACTTTCAACAACGGATCTCTTGGTTCCG
>OTU_1687	AAGTCGTAACAAGGTTTCCGTAGGTGAACCTGCGGAAGGATCATTACCGAGTGAGGGCCCTCTGGGTCCAACCTCCCACCCGTGTCTATTGTACCACGTTGCTTCGGCGGGCCCGCCCCTATCCGTAGGGGCCGTCGGGGGCATCGCCCCGGGCGTGCGCCCGCCGAGGACCCCACGAACGCTGTCTGAAGACTGCCGTCTGAGTGGATTGATAAATCAGTCAAAACTTTCAACAACGGATCTCTTGGTTCCG
>OTU_1688	AAGTCGTAACAAGGTCTCCGTTGGTGAACCAGCGGAGGGATCATTACAAGAAGCCGAAAGGCTACTCCAAACCATCGCGAACTCGTCCAAGTTGCTTCGGCGGTGCGGCGTCCCCACGGGGGCCCGCGGCGCCGCGCCTCCCCGGAGGCGCGGGGCGCCCGCCGGAGGTCACAAACTCTCATGCATTATAGTGGTATCTCTGAGTAAAACACAAATAAGTTAAAACTTTCAACAACGGATCTCTTGGTTCTG
>OTU_1689	AAGTCGTAACAAGGTCTCCGTTGGTGAACCAGCGGAGGGATCATTATAGAGTCTAAAAAACTCCCAAACCCATGTGGACATACCTCAAGTTGCCTCGGCAGGTCGCGCCTACCTGGTAAGATCTTACCCTGTAAGATCTACCCTGTAAGCGCGGGTAAGCCTGCCAGTGGACCAACAAACTCTGTTTATTTTTGAATTCTGAATCTATAACTAAATAAGTTAAAACTTTCAACAACGGATCTCTTGGTTCTG
>OTU_169	AAGTCGTAACAAGGTTTCCGTATCATTAACAACGTATCCTAAACGTAAAAAACCCCCCCTGTGAACTTTCATAACCCGAGCTTGCTAGGCCCGCGAAATTCAGCAATCCCTGGTAAATCATTGTTGACCAGCTCTTTGAGTCAGGGATATCCGAACTAGTCGTGTGGATTAAGTTCCGTGAAGCAAGAGCGGTGAGGCAAGTGACCCGGTACCCCCAAGCAATCAATGTTCTGTCAGTGTCGTTGATTGTGTAAGGGTGGCGCAGTAAACGATCGCTGGAGGCCACCACGGCCGGCGACTGGGTCAGCGAGCTCTGCTCCTTAATAACCCCACCTAAGGATTAGCTCGGCGAAAGCTTGAGCACCAAAAACTAATACGACTGTTAACAATGGATATCTT…
>OTU_1690	AAGTCGTAACAAGGTTTCCGTAGGTGAACCTGCGGAAGGATCATTACCGAGTGCTGGGTCCTTCGGGGCCCAACCTCCCACCCGTGCTTACCGTACCCTGTTGCTTCGGCGGGCCCGCCTTCGGGCGGCCCGGGGCCTGCCCCCGGGACCGCGCCCGCCGGAGACCCCAATGGAACACTGTCTGAAAGCGTGCAGTCTGAGTTGATTGATACCAATCAGTTAAAACTTTCAACAATGGATCTCTTGGTTCCG
>OTU_1691	AAGTCGTAACAAGGTTTCCGTAGGTGAACCTGCGGAAGGATCATTAGTGAATTTGTAGCCTCCAAGGCTCACATTCTCTATCCTTTACACACCTGTGCACCCTTCTGAAGCGGAGAGTTATTAGGCATTGGCCGAGCGCCTCCCTTCGGTTATTATATCAAACTCAAACTACGTTTACTAGAATGTATACCGTCTTGTTGTAACGACAAGTACAATCCAATAAAACTTTCAGCAACGGATCTCTTGGCTCAG
>OTU_1692	AAGTCGTAACAAGGTTTCCGTAGGTGAACCTGCGGAAGGATCATTACCGTGCCGGGGGCCCTTCGGGGTCCCATTGTGCCACCCGTGTTTACTTGTACCTGTTGCTTCGGCGGGCCTGCGGGCCTCGCTCGCTGCCGGGGGACTGGGTCCCCGGGCGCGTGCCCGCCGGAGACACCCCAAACTTCTCTAACGGATACGTCTGAGCAAATGATCTAATCATTAAAACTTTCAACAACGGATCTCTTGGTTCCC
>OTU_1693	AAGTCGTAACAAGGTTTCCGTAGGTGAACCTGCGGAAGGATCATTATCGATTCAGAGAACGTGCTGGCTTCTTTCTGGAAGCATGTTTGTGCACTCTCAATCTCTTGTCCCACCTGTGCATATTTTGATGAGTGAGATGTGGTTTTTACCCTACTCAATTGCTCATCGCTTTTCACATACACCTATTTATAAACATCTGTTTGATTGTAAATGAATTTATAACAACTTTCAACAATGGATCTCTTGGTTCTC
>OTU_1694	AAGTCGTAACAAGGTTTCCGTAGGTGAACCTGCGGAAGGATCATTACTGAGTGAGGGCCCTCTGGGTCCAACCTCCCACCCGTGTTTAATCGTACCTTGTTGCTTCGGCGGGCCCGCCTCACGGCCGCCGGGGGGCTCTACGCCCCCGGGCCCGCGCCCGCCGAAGACACCATCGAACGCTGTCTGAAGTTTGCAGTCTGAGCAGATTTAGCAAAATCGTTAAAACTTTCAACAACGGATCTCTTGGTTCCG
>OTU_1695	AAGTCGTAACAAGGTTTCCGTAGGTGAACCTGCGGAAGGATCATTACCGAGTGTAGGGTTCCTAGCGAGCCCAACCTCCCACCCGTGTTTATCGTACCTTGTTGCTTCGGCGGGCCCGCCTCACGGCCGCCGGGGGGCTTCTGCCCTCTGGCCCGCGCCCGCCGAAGACACCATTGAACGCTGTCTGAAGATTGCAGTCTGAGCAATTAGCTAAATAAGTTAAAACTTTCAACAACGGATCTCTTGGTTCCG
>OTU_1696	AAGTCGTAACAAGGTTTCCGTAGGTGAACCTGCGGAAGGATCATTAATGAACTTGGGGTTTCTGTGCCGCCTTTAACGAGGATTGTGCACGCTACCCCTTAATCCTTTTAACACCTGTGCACATTGAGAGAATTGTCGAGTGGCTTAATTGCCGCATGGCGAATCTCTATTACAAACTCATAGTCAAACGAATGTTCATTGGCCGAAAGGCTCTAAATAAAACAACTTTTAACAACGGATCTCTTGGCTCTC
>OTU_1697	AAGTCGTAACAAGGTTTCCGTAGGTGAACCTGCGGAAGGATCATTACCGAGTGAGGGCCCTCTGGGTCCAACCTCCCACCCGTGTTTATCGTACCTTGTTGCTTCGGCGGGCCCGCCTCACGGCCGCCGGGGGGCATCCGCCCCCGGGCCCGCGCCCGCCGGAGACACCACGAACTCTGTCTGATCTAGTGAAGTCTGAGTTGATTGTATCGCAATCAGTTAAAACTTTCAACAATGGATCTCTTGGTTCCG
>OTU_1698	AAGTCGTAACAAGGTCTCCGTTGGTGAACCAGCGGAGGGATCATTACAGAGTTACTACTCCAAACCCATTGTGAACCTTACCTATGTTCTGTTGCCTCGGCGGGGCGGTCGGCGCCCCCTCTCCGCGAGGAGGGGAGACGATGGACCCCCCGCCGGCAGCACCAAACTCTTGAATTTTATAGCGGATTACAAGCTCTGATTGGaaaacaaaaaaacaaatcaaaaCTTTCAACAACGGATCTCTTGGTTCTG
>OTU_1699	AAGTCGTAACAAGGTTTCCGTAGGTGAACCTGCGGAAGGATCATTAAATGAAGCAACCTAGGAGCCTGAGATATGGCCACCGGGCACACCTTCCACCCTTTGTTTATCACACTTTGTTGCTTTGGCAGGCCTGCCTTCGGGCTGCTGGCTCCGGCCGGCGAGTGCCTGCCAGAGGACCCAAACTCTGTTTGTCTGTAACGTCTGAGTACTATATAATAGTTAAAACTTTCAACAACGGATCTCTTGGTTCTG
>OTU_17	AAGTCGTAACAAGGTTTCCGTAGGTGAACCTGCGGAAGGATCATTAACAACGTATCCTAAACGTAAAAAACCCCCCCTGTGAACTTTCATAACCCGAGCTTGCTAGGCCCGCGAAATTCAGCAATCCCTGGTAAATCATTGTTGACCAGCTCTTTGAGTCAGGGATATCCGAACTAGTCGTGTGGATTAAGTTCCGTGAAGCAAGAGCGGTGAGGCAAGTGACCCGGTACCCTCAAGACCAGTGTTCAATGATCTGTCAGTGTTCATTGACTGGAATCAAACGTTCTGTCAGTGTGCGTTTGATTTGCAAGGGTGGCGCAGTAAACGATCGCTGGAGGCCACCACGGCCGGCGACTGGGTCAGCGAGCTCTGCTCCTTAATAACCCCACCTAAGGATTA…
>OTU_170	AAGTCGTAACAAGGTTTCCGTAGGTGAACCTGCGGAAGGATCATTAACACGTATCCAACGTTAAAACAACCCTGTGAACCTTTAGCGTGCTCTTGCAGCCCATGAAAGCAGCAATCCCTGGTAAATCATTGTTGACTAGCTATTGAGTCAGGGACCTCTGCCGATGAGAAGTTACAGTTGCAATCCGAGCGCTTGCTTAAGTGACCTGGCACCCCCAAGCAATCAATGTTCTGTCAGTGTCGTTGATTGTGTAAGGGTGGCGCAGTAAACGATCGCTGGAGGCCACCACGGCCGGCGACTGGGTCAGCGAGCTCTGCTCCTTAATAACCCCACCTAAGGATTAGCTCGGCGAAAGCTTGAGCACCAAAAACTAATACGACTGTTAACAATGGATATCTT…
>OTU_1700	AAGTCGTAACAAGGTTTCCGTAGGTGAACCTGCGGAAGGATCATTAACAATATATGACCCTGCAACCTGCATCTCATAAACCCACTCCGTGTACTTGTCCTTGTTGCTTCCGTGAGTTCGATCACTCGATCGTCATTCCCGAATCACCGGGAAGCTTGCGGGAGGATTGCTTCGTACACGCTTTTATTACCGTCATCTGAAGTCTTGCATTTGCAAACATTAAAACTTTCAACAACGGATCTCTTGGTTCTC
>OTU_1701	AAGTCGTAACAAGGTTTCCGTAGGTGAACCTGCGGAAGGATCATTACTGAGTGAGGGCCCCTCGGGGTCCAACCTCCCACCCGTGTTTAACGAACCTTTGTTGCTTCGGCGGGCCCGCCTCACGGCCGCCGGGGGGCTCCTGCCCCCGGGCCCGCGCCCGCCGAAGCCCCCCCTTGAACGCTGTCTGAAGTTTGCAGTCTGAGAAACTAGCTAAATTAGTTAAAACTTTCAACAACGGATCTCTTGGTTCCG
>OTU_1702	AAGTCGTAACAAGGTTTCCGTAGGTGAACCTGCGGAAGGATCATTATTGAGAAATCGAAGCAGCCTGCTGCTGGCCTCTCTTGCAAAGGAGGGGCATGTGCGCGCCTGTTCTCGTTCCACTCACACCTGTGCACTGCTCGGGGGCTGGCGAAAGCCTGCCTCTGTTTACACAAACACTTGTATGTAACAGAATGTTTCTTTTTGCGCAATGCAAATCTTTAACAACTTTCAACAACGGATCTCTTGGCTCTC
>OTU_1703	AAGTCGTAACAAGGTCTCCGTTGGTGAACCAGCGGAGGGATCATTAAAAGAGGCCGAAAGGCTCCTATAAACCATTGCGAACTCGTCCAAGTTGCTTCGGCGGCGCGGTGCCCCTCGGGGTGCCGCAGCGCCGCTTCCCCCCCGGGGGTTGCGGAGCGCCCGCCGGAGGTCACAAACTCTCATGTATTATAGTGGATCTCTGAGTACAAAACAAATAAGTTAAAACTTTCAACAACGGATCTCTTGGTTCTG
>OTU_1704	AAGTCGTAACAAGGTTTCCGTAGGTGAACCTGCGGAAGGATCATTACTGAGTAACTGGGTTCGCACTCGTGCTGCCCGTTCTCCCACCCTGTGTATATGTACCTTCGTTGCCTCGGCGGGCCTGCGGCCCCGTCCGCTGCCGGCTTCGGCTGGCTAGCGCCCGCCAGGGGACCAACCAAACTCTATTTTAACGTGTCGTCTGAGTACAACGCAAATAAATTAAAACTTTCAACAACGGATCTCTTGGTTCTG
>OTU_1705	AAGTCGTAACAAGGTCTCCGTTGGTGAACCAGCGGAGGGATCATTACCGAGTTGCAAAACTCCTACACCCAACTGTCTACCTATACGGaaaaaaaaaCGTTTGCTTCGGCGGGCGGCCCCAGGGCGGGGCCGACGCCTGCGCTCCGGCGCGGCGCCCGCCGGAGGAAACATCCTAAACTCTTGATGTTTTAGTAACACTCTGAGCCTAAAAGACAATAGTCAAAACTTTCAACAACGGATCTCTTGGTTCTG
>OTU_1706	AAGTCGTAACAAGGTTTCCGTAGGTGAACCTGCGGAAGGATCATTACCTTTCATCAGGGGCCTGGCGTAAATAATGGGGGCTTGCTCCCTTATTGGCCTTGCCTTTCTGATTCTACCCATGATTTTTGCGCACTCTTTGTTTCCTCGGCAGGCTTGCTTGCCGATAGGACCAACTATAACCCCTTGTAATTGCAATCAGCGTCAGTAACAAGTAAATTATTACAACTTTCAACAACGGATCTCTTGGTTCTG
>OTU_1707	AAGTCGTAACAAGGTTTCCGTAGGTGAACCTGCGGAAGGATCATTCATAATCAAAGTGTTTTTATGGCACTTTTAAAAAAATCCATATCCACCTTGTGTGCAATGTCATCTCTCTGGGGGCTGCCGGCTGTCAAAAGCCGTGTGGTCACCTTTGGGATTTATATCTACTCAGAACTTTAGTGATTTTGTCTGAAACATATTATGAATACTTAATTCAAAATACAACTTTCAACAACGGATCTCTTGGCTCTC
>OTU_1708	AAGTCGTAACAAGGTTTCCGTAGGTGAACCTGCGGAAGGATCATTAACAAATCATGTTTGCGGTATGTCCCCGTGACATTACCTGCAATATACACCCGAACCCGTGCAGCAATGCCGGGCTAGGTGCAGTCCGCTCTTGTAGTGGGCTGCGGGACTGAATCTGATTCAGTTCCACATAGACGCTTGTATGTTTGACAGTTTATTTGTTGTAAAAAACAAAGACAACTTTTAACAATGGATCTCTTGGCTCTT
>OTU_1709	AAGTCGTAACAAGGTTTCCGTAGGTGAACCTGCGGAAGGATCATTAGTGAATAATAGGACGTCTTCTCTTCGGAGAGAGTCCGACCTCTCACTTTCTAACACGGTGCACTTAAATATTTGGGAATCAAGCTTTGAATAGAACGTGTTCTATTTCTCTAGCTCCCGATTACTTTTTATAACTCTACAAGTTAAAGAATGTAATGATAAACCATAACAAAAGAAAAACTTTCAACAACGGATCTCTTGGCTCTC
>OTU_171	AAGTCGTAACAAGGTTTCCGTAGGTGAACCTGCGGAAGGATCATTAACAACGTATCCTAAACGTAAAAAACCCCCCCTGTGAACTTTCATAACCCGAGCTTGCTAGGCCCGCGAAATTCAGCAATCCCTGGTAAATCATTGTTGACCAGCTCTTTGAGTCAGGGATATCCGAACTAGTCGTGTGGATTAAGTTCCGTGAAGCAAGAGCGGTGAGGCAAGTGACCCGGTACCCCCAAGCAATCAATGTTCTGTCAGTGTCGTTGATTGTGTAAGGGTGGCGCAGTAAACGATCGCTGGAGGCCACCACGGCCGGCGACTGGGAATAACCCCACCAAAGGATTAGCTCGGCGAAAGCTTGAGCACCAAAAACTAATACGACTGTTAACAATGGATATCTTG…
>OTU_1710	AAGTCGTAACAAGGTTTCCGTAGGTGAACCTGCGGAAGGATCATTACTGAGTGAGGGCCCTCTGGGTCCAACCTCCCACCCGTGTTTATTGTACCTTGTTGCTTCGGCGCGCCCGCCTCACGGCCGCCGGGGGGGCATCCGCCCCCGGGCCCGCGCCCGCCGAAGACACCATTGAACTCTTGTCTGAAGATTGCAGTCTGAGTAGATTAGCTAAATCAGTTAAAACTTTCAACAACGGATCTCTTGGTTCCG
>OTU_1711	AAGTCGTAACAAGGTCTCCGTTGGTGAACCAGCGGAGGGATCATTACAGAGTTTACAACTCCCAAACCCACTGTGAACCTTACAGCGTCGTTGCCTCGGCGGACCGCCCCCGGCGCGcccccccccTCGGGGGGACGCCCGGGACCACGGCGCCCGCCGGAGGACCCAAACTCTTGTATTTGCAGGATGCATTGCTCTGAGTGAAAACAAGCAAATGAATCAAAACTTTCAACAACGGATCTCTTGGTTCTG
>OTU_1712	AAGTCGTAACAAGGTTTCCGTAGGTGAACCTGCGGAAGGATCATTACCGAGTGTAGGGTTCCTAGCGAGCCCAACCTCCCACCCGTGTTTACTGTACCTTAGTTGCTTCGGCGGGCCCGCCATTCATGGCCGCCGGGGGCTCTCAGCCCCGGGCCCGCGCCCGCCGGAGACACCACGAACTCTGTCTGATCTAGTGAAGTCTGAGTACTGTGAAAATTGTCAAAACTTTCAACAATGGATCTCTTGGTTCCG
>OTU_1713	AAGTCGTAACAAGGTCTCCGTAGGTGAACCTGCGGAGGGATCATTACAGAGTTCGTGCCCTCGCGGGTAGATCTCCCACCCTTGTGTATTTTCATGCCTTTGTTGCTTTGGCAGGCCGCTGGGCTTCGGCCTGGCCACCGGCTCCCCGGGGCTGGTGCGCGCCTGCCAGAGGATCTCCAAAACTCGGTTTGTCAGTGTCGTCTGAGTACCATACAATCGTTAAAACTTTCAACAACGGATCTCTTGGTTCTG
>OTU_1714	AAGTCGTAACAAGGTTTCCGTAGGTGAACCTGCGGAAGGATCATTAAAAGGTTTATCTGGGGGTGGAAACCCCCCCGGAAAACTCCACCCTTGTGTATTATTACTTGTTGCTTTGGTGGGCCGCGAGATTGCCTAGCGATTGAGCACCGGCTTCGGCTGGAGAGCGCCTGCCAGAGGACCAAACTCTGTTATTTATGTCGTCTGAGTACTATTTAATAGTTAAAACTTTCAACAACGGATCTCTTGGTTCTG
>OTU_1715	AAGTCGTAACAAGGTTTCCGTAGGTGAACCTGCGGAAGGATCATTACCGTGCCGGGGGCCCTCCGGGGTCCCATTGTGCCACCCGTGTTTACTTGTACCTGTTGCTTCGGCGGGCCTGCGGGCCTCGCTCGCTGCCGGGGGACCTGGTCCCCGGGCTCGTGCCCGCCGGAGACACACCCAACCTCTCTAACGTATACGTCTGAGCAAATGATCTAATCATTAAAACTTTCAACAACGGATCTCTTGGTTCCC
>OTU_1716	AAGTCGTAACAAGGTTTCCGTAGGTGAACCTGCGGAAGGATCATTACAGTAGTCGCCCGGGTTGCCGCAAGGCCTCCCGGGTAACCTACCACCCTTTGTTTATTACACTTTGTTGCTTTGGCAAGCCTGCCCTCGGGCTGCTGGCTCCGGCCGGCGAGCGCTTGCCAGAGGACCTAAACTCTGTCTGAAGATTGTAGTCTGAGTGAAAATATAAATTATTTAAAACTTTCAACAACGGATCTCTTGGTTCCG
>OTU_1717	AAGTCGTAACAAGGTTTCCGTAGGTGAACCTGCGGAAGGATCATTACTGAGTGAGGGCCCTCTGGGTCCAACCTCCCACCCGTGTTTATTGTACCTTGTTGCTTcggcgcgcccgcctcacggccgccggggggcatccgcccccgggcccgcgcccgccGAAGACACCATTGAACTCTTGTCTGAAGATTGCAGTCTGAGTTGATTGAATGCAATCAGTTAAAACTTTCAACAATGGATCTCTTGGTTCCG
>OTU_1719	AAGTCGTAACAAGGTTTCCGTAGGTGAACCTGCGGAAGGATCATTATTACAAGGCTCCCTGGCCCCCCAAGCTTCGGCGGAAGGGGGCTACAGCCTGACTTATATACCCACCCTTTGCCTATGTGTACCCCTATTGCTTCCCTCGGCGGGTTCGCCCGCCGACAGGAACCAACTAAACCCTTTGCATTATACATTTAACTCTGATACAAAACTAAATTATTACAACTTTTAACAATGGATCTCTTGGTTCTG
>OTU_172	AAGTCGTAACAAGGTTTCCGTAGGTGAACCTGCGGAAGGATCATTAACAACGTATCCTAAACGTAAAAAACCCCCCCTGTGAACTTTCATAACCCGAGCTTGCTAGGCCCGCGAAATCATTGTTGACCAGCTCTTTGAGTCAGGGATATCCGAACTAGTCGTGTGGATTAAGTTCCGTGAAGCAAGAGCGGTGAGGCAAGTGACCCGGTACCCCCAAGCAATCAATGTTCTGTCAGTGTCGTTGATTGTGTAAGGGTGGCGCAGTAAACGATCGCTGGAGGCCACCACGGCCGGCGACTGGGTCAGCGAGCTCTGCTCCTTAATAACCCCACCTAAGGATTAGCTCGGCGAAAGCTTGAGCACCAAAAACTAATACGACTGTTAACAATGGATATCTTG…
>OTU_1720	AAAGTCGTAACAAGGTCTCCGTTGGTGAACCAGCGGAGGGATCATTACTGAGTGTAAAAACTCCCAAACCAATGTGAACATACCACTGTTGCTTCGGCGGCCTCGTCCCGCGGAGCGTCTTCCCCCCAGGGGGCTGGCGCGGCCCGGACCCAGGCGACCGCCGGAGGACCCAAACTCTTGCCTTTATAGTGCATATCTGAGTGGCATAAGCAAAATAAATCAAAACTTTCAGCAACGGATCTCTTGGTTCTG
>OTU_1721	AAGTCGTAACAAGGTCTCCGTTGGTGAACCAGCGGAGGGATCATTACAGAGTTGCAAAACTCCCCAAACCATCGTGAACTTACCTTCAACCGTTGCTTCGGCGGGCGGGCCCGGGTCACCACCCGGCCGCCCCCTCGGCCCCGCTCGCGGGGCGCCCGCCGGAGGTATCCAAACTCTTGATACTTTTATGGCCTCTCTGAGTCTTCTGTACTGAATAAGTCAAAACTTTCAACAACGGATCTCTTGGTTCTG
>OTU_1722	AAGTCGTAACAAGGTTTCCGTAGGTGAACCTGCGGAAGGATCATTCATAAATGAGTGTTTTATGGCACTCTTTAAAAATCCATATCCACCTTGTGTGCAATGTCATCTCACTGGAGGCCAGCTGGCTGTCAAAAGCCCGTTTGGTCACCTTTGGGATTTATATCTACTCAGAACTTTAGTGATTTTGTCTGAAAAATATTATGAATAACTTAATTCAAAATACAACTTTCAACAACGGATCTCTTGGCTCTC
>OTU_1723	AAGTCGTAACAAGGTTTCCGTAGGTGAACCTGCGGAAGGATCATTCATAATCAAAGTGTTTTTATGGCACTTTTAAAAAAATCCATATCCACCTTGTGTGCAATGTCATCTCACTGGAGGTCAACGGCTGTAAAAATCCGTTTGGTCACCTTTGGGATTTATATCTACTCAGAACTTTAGTGATTTTGTCTGAAACATATTATGAATACTTAATTCAAAATACAACTTTCAACAACGGATCTCTTGGCTCTC
>OTU_1725	AAGTCGTAACAAGGTTTCCGTAGGTGAACCTGCGGAAGGATCATTACCGAGTGAGGGCCCTCTGGGTCCAACCTCCCACCCGTGTTTATCGTACCTTGTTGCTTCGGCGGGCCCGCCTCACGGCCGCCGGGGGGCATCCGCCCCCGGGCCCGCGCCCGCCGAAGACACCAATGAACTCTGTCTGAAGATTGCAGTCTGAGCGATTAGCTAAATCAGTTAAAACTTTCAACAACGGATCTCTTGGTTCCGGCA
>OTU_1728	AAGTCGTAACAAGGTCTCCGTTGGTGAACCAGCGGAGGGATCATTACCGAGTTTACAACTCCCAAACCCTTTGTGAACCTTACCTTTACGTTGCTTCGGCGGACACGCCCCGGGCGCACCTCCTCACGGGGGCGTGCCCCGGAACCAGGCGCCCGCCGGGGGACCGAAACCTCTGTATTTACCATTTGAGTACTCTGAGTGTGATTTACAAAATCAAAATTAAAACTTTCAACAACGGATCTCTTGGCTCTA
>OTU_1729	AAGTCGTAACAAGGTCTCCGTTGGTGAACCAGCGGAGGGATCATTACAGAGTTGCAAAACTCCCTAAACCATTGTGAACGTTACCTTCAAACCGTTGCttcggcgggcggccccggggtttaccccccgggcgcccctgggccccaccgcgggcgcccgCCGGAGGTAAACCAAACTATTGCATTGTATGGCCTCTCTGAGTCTTCTGTACTGAATAAGTCAAAACTTTCAACAACGGATCTCTTGGTTCTG
>OTU_173	AAGTCGTAACAAGGTTTCCGTAGGTGAACCTGCGGAAGGATCATTAACACGTATCCAACGTTAAAACAACCCTGTGAACCTTTAGCGTGCTCTTGCAGCCCATGAAAGCAGCAATCCCTGGTAAATCATTGATGACCAGCTTTTGAGTCAGGGACCTCTGCCGATGAGAAGTTACAGTTGCAATTGAGCGCTTGCTTAAGTGACCTGGCATCCCCAAGCAATCCGTGTCTGAAAGTGTCACTGGTTGTGTAAGGATGGCGCAGTAACGATCGCTGGAGGCCCACACGGCCGGCGACCGGGTCACCGGGCTCACGCCCCTTAACCAACCCCACCTAAGGATTAGCTCGGCGAAAGCTTGAGCACCAAAAACTAATACGACTGTTAACAATGGATATCTTG…
>OTU_1730	AAGTCGTAACAAGGTCTCCGTTGGTGAACCAGCGGAGGGATCATTACAGAGTTGCAAAACTCCCTAAACCATTGTGAACCTACCCTCAACCGTTGCTTcggcgggcgggcccgggccccaccgcccggacgccccccccggcccctcgcggggcgcccgcCGGAGGTCACCAAACTCTTGATAATTTATGGCCTCTCTGAGTCTTCTGTACTGAATAAGTCAAAACTTTCAACAACGGATCTCTTGGTTCTG
>OTU_1731	AAGTCGTAACAAGGTCTCCGTTGGTGAACCAGCGGAGGGATCATTACCGAAGTTACCTTCAAAACCCACTGTGAACCTTACCTCTTGCCGCGTTGTCTCGGCGGGAGGCGGGGGACGTCACGCGCCCCGCAACGGGCCGTGCCGCTCCCCGTCCCCGCCGGCGGCGCCAAACTCTAAATGCACAGCGGACTGTATGTTCTGATTTACaaaaaaaaCAAGTTAAAACTTTCAACAACGGATCTCTTGGTTCTG
>OTU_1732	AAGTCGTAACAAGGTTTCCGTAGGTGAACCTGCGGAAGGATCATTACCGAGTAACTGGGTCGGCGTATGCCTCCCGTTCTCCCACCCTATGTTTACTTACTCCTGTTGCCTCGGCGGGCCTGCGGGCCCCACCCGCTGCTGGCCTCGGCTAGTTAGCGCCCGCCAGAGGGACCCATTAAACTCTATTTTAACGTGTCGTCTGAGTAAAACTTTAATAAGTTAAAACTTTCAACAACGGATCTCTTGGTTCTG
>OTU_1734	AAGTCGTAACAAGGTTTCCGTAGGTGAACCAGCGGAGGGATCATTACCGAGTCTTCGCACTCAAATAACCCTTCTGTGGACCTAAATAAAACCGTTGCCTCGGCGGGCGGCCCCACCTGTGGGCCGGATAGCCCGGTCGCCTCCAGGCGCCGGCGCCAGCCGCTGGCCCAAAATAAAAACTCTAGTAACCTTGTCTTCTGAGTTTTAACGAAAATAAAGTCAAAACTTTCAACAACGGATCTCTTGGCTCTG
>OTU_1735	AAGTCGTAACAAGGTCTCCGTTGGTGAACCAGCGGAGGGATCATTACAAGAAGCCGAAAGGCTACTTCAAACCATCGCGAACTCGTCCAGGTTGCTTCGGCGGTGCGGCTCCCCTCGGGGGGCCGCGGCGCCGCGCCTCCCCCGGAGGTGCGGGGCGCCCGCCGGAGGTCACAAACACTCGTGTATTATAGTGGCATCTCTGAGTAAAACACAAACAAGTCAAAACTTTCAACAACGGATCTCTTGGTTCTG
>OTU_1736	AAGTCGTAACAAGGTCTCCGTTGGTGAACCAGCGGAGGGATCATTACAGAGTTGCAAAACTCCCTAAACCATTGTGAACCTACCACTAAACAGTTGCTTCGGCGGGTGGCGCCCCCTCACCCGGAGCGCCGCGCCGGCCCCTCCCCGGGGCCCGGCAACCCGTCAGAGGCCCGCAACTCTTAGTCATCATTGGCCTCTCTGAGTAACTTATACAATAAGTCAAAACTTTCAACAACGGATCTCTTGGTTCTG
>OTU_1737	AAGTCGTAACAAGGTTTCCGTAGGTGAACCTGCGGAAGGATCATTACCGAGTTAGGGTCTTCTAGGCCCGACCTCCAACCCTTTGTTTACTATACCGTGTTGCTTTGGCGGGCCTGCCTTTCGGGGCTGCCGGGGACTTTCATAGCCCCTGATCAGTGCCCGCCAGTAGCCTTCTTAAATACTTTTATAATTATGTTGTCTGAGTATACAAATAAATCGTTAAAACTTTCAACAACGGATCTCTTGGTTCTG
>OTU_1738	AAGTCGTACCAAGGTCTCCGTTGGTGAACCAGCGGAGGGATCATTACAAGATGCCGAAAGGCTACTTCAAACCATCGCGAACTCGTCCAAGTTGCTTCGGCGGTGCGGCTCCCCCCCGGGGGGCCGCGGCGCCGCGCCTCCCCGGAGGTGCGAGGCGCCCGCCGGAGGTCACAAACTCTTATGTATTATAGTGGCATCTCTGAGTAAAACACAAATAAGTTAAAACTTTCAACAACGGATCTCTTGGTTCTG
>OTU_1739	AAGTCGTAACAAGGTTTCCGTAGGTGAACCTGCGGAAGGATCATTAAACGAAAGCTGAGTGGTTCGCTGCTCAACCTTCCACCCTTTGAAAACAAAATTTATTGTTGCTTTGGCGGGGCGTGACCCTCCGGTCCCGTTGGCCTAGGCTGACGAGTCCCCGCCAGAGAACCCCAAAACTCTATTTAAACTATGAAGTCTGAATAAAAAATTTAATAGCGATAAAACTTTCAACAACGGATCTCTTGGTTCTG
>OTU_174	GGGAATCTTCCGCAATGGGCGAAAGCCTGACGGAGCAACGCCGCGTGAGTGAAGAAGGCCTTCGGGTCGTAAAGCTCTGTGACCAGGGAAGAAGAAAGTGACGGTACCTGGAGAGGAAGCCCCGGCTAACTACGTGCCAGCAGCCGCGGTAAAACGTAGGGGGCAAGCGTTGTCCGGAATTACTGGGCGTAAAGGGCGTGTAGGTGGCCCGTGAAGTCGAGAGTGAAAACCGAGGGCTTAACCTTCGGCCTGCTTTCGAAACCAGCGGGCTTGAGTGCAGTAGAGGGAAGTGGAATTCCCAGTGTAGCGGTGAAATGCGTAGATATTGGGAGGAACACCAGTGGCGAAAGCGGCTTCCTGGCCTGCAACTGACACTGAGGCGCGAAAGCGTGGGGAGCA…
>OTU_1740	AAGTCGTAACAAGGTTTCCGTAGGTGAACCTGCGGAAGGATCATTAACAAATCATTTGAGTGCGGTAGCAGTGGGGAGTCACTTCCTTGCTTGCTGCTTGCACACATAAGCCCTAGAGCGCAGCACTTAACCGTGCCGCGCTTTAGTACGGTCATTCTTCGGAATCGACCACATTAACGCTTGTTTGTTTGACAGAGTATTATGATACACATAATAATAGACAACTTTTAACAATGGATCTCTTGGCTCTT
>OTU_1741	AAGTCGTAACAAGGTCTCCGTTGGTGAACCAGCGGAGGGATCATTACCGAGTTGCAAAACTCCCAAACCCCAATGTTTATCTATCTTGAAAACGTCTGCTTCGGCGGGCGGCCCCAGGGCGGGGCCGCAGCCTAGCGCTTCGGCGCCGGGCGCCCGCCGGAGAGGACAACCCAAAAACTCTTGTTTTTAATGAAACTCTGAGCATAAAAGACAAATAGTCAAAACTTTCAACAACGGATCTCTTGGTTCTG
>OTU_1742	AAGTCGTAACAAGGTCTCCGTTGGTGAACCAGCGGAGGGATCATTACAGAGTTGCAAAACTCCCTAAACCATTGTGAACGTTACCTAAACCGTTGCTtcggcgggcggccccggggtttaccccccgggcgcccctgggcccccaccgcgggcgcccgccGGAGGTCACCAAACTCTTGATAATTTATGGCCTCTCTGAGTCTTCTGTACTGAATAAGTCAAAACTTTCAACAACGGATCTCTTGGTTCTG
>OTU_1743	AAGTCGTAACAAGGTCTCCGTTGGTGAACCAGCGGAGGGATCATTACCGAGTTATACAACTCCCAAACCCACTGTGAACCTTACCTCTACGTTGCTTCGGCGGGACCGCCCCGGGTACACCTGTGACCCGGATCCAGGCGCCCGCCGGAGGCCCCAAAACTCTCATGTTTACCATAGCGGAATTTCTTCTGAGTGGCCCTTTGCGGCAAACAAATGAATCAAAACTTTCAACAACGGATCTCTTGGTTCTG
>OTU_1744	AAGTCGTAACAAGGTTTCCGTAGGTGAACCTGCGGAAGGATCATTACCGAGTGAGGGCCCTCTGGGTCCAACCTCCCACCCGTGTTGCACGAACCTGTGTTGCttcggcgggcccgccgccaggccgccggggggcatccgcccccgggcccgcgcccgcCGAAGCCCCCCTCTGAACGCTGTCTGAAGTTGCAGTCTGAGACAACTAGCTAAATTAGTTAAAACTTTCAACAACGGATCTCTTGGTTCCG
>OTU_1745	AAGTCGTAACAAGGTCTCCGTTGGTGAACCAGCGGAGGGATCATTACAAGAAGCCGAAAGGCTACTTCAAACCATCGCGAACTCGTCCAAGTTGCTTCGGCGGTGCGGCCTCCCCCCGGGGGCCGCGGCGCCGCGCCTCCCCGGAGGTGCGGGGCGCCCGCCGGAGGTCACAAACTCTCATGTATTATAGTGGCATCTCTGAGTGAAACACAAATAAGTTAAAACTTTCAACAACGGATCTCTTGGTTCTG
>OTU_1746	AAGTCGTAACAAGGTCTCCGTAGGTGAACCTGCGGAGGGATCATTGATCGAGCGAGGGCGCCCGCGCGCGCCCTAACTCCCACACCCCCGTGCGATCCGACCTCCGAACCGTTGCCTCGGCGGGGCATCCGGGTCCGCCCGCGCGGCCCTGCCGAGGGACCGACCTAAAATCCTCTTAAAAACACACGTCTGAGACCCACACCGATCAGAATCGGCGAACAAAACTTTCAACAACGGATCTCTTGGTTCCG
>OTU_1747	AAGTCGTAACAAGGTCTCCGTTGGTGAACCAGCGGAGGGATCATTACAAGAAGCCGAAAGGCTACTTAAAACCATTGCGAACTTATCCAAGTTGCTTCGGCGGCGCGGCTCCCCTCGCGGGGTGCCGCAGCCCCGCCTCTCCGGAGGTGACGGGCGCCCGCCGGAGGTACGAAACTCTATTGTATTATAGTGGCATCTCTGAGTAAAAAACAAATAAGTTAAAACTTTCAACAACGGATCTCTTGGTTCTG
>OTU_1748	AAGTCGTAACAAGGTCTCCGTTGGTGAACCAGCGGAGGGATCATTACAGAGTTGCAAAACTCCCAAACCATTGTGAACGTTACCTTTAACCGTTGCTTCGGCGGGCGGCTCCGGGATCACTCCCGGGGCCCCTGGGCCCCCCAGCGGGGCGCCCGCCGGAGGTCACCTAACTCTTGATAATTTATGGCCTCTCTGAGTCTTCTGTACTGAATAAGTCAAAACTTTCAACAACGGATCTCTTGGTTCTGGCA
>OTU_1749	AAGTCGTAACAAGGTCTCCGTTGGTGAACCAGCGGAGGGATCATTACAGAGTTGCAAAACTCCCAAACCATTGTGAACGTTACCTTTAACCGTTGCTTCGGCGGGCGGCTCCGGGATCACTCCCGGGGCCCCTGGGCCCCCCAGCGGGGCGCCCGCCGGAGGTATCTAACTAACTCTTGACAATTGTATGGCCTCTCTGAGTCTTTGTACTTAATAAGTCAAAACTTTCAACAACGGATCTCTTGGTTCTG
>OTU_175	GGGGATCTTGCACAATGGGCGAAAGCCTGATGCAGCGACGCCGCGTGAGCGAAGAAGGCCTTCGGGTTGTAAAGCTCTGTCTGGAGGGACGAACAAAATGACGGTACCTCCGGAGGAAGCCACGGCTAACTACGTGCCAGCAGCCGCGGTAATACGTAGGTGGCGAGCGTTGTCCGGAATTACTGGGCGTAAAGGGCGCGCAGGCGGCCTGTTAAGTCGGACGTGAAATCCCCTGGCTCAACTGGGGGAGGTCGTTCGAAACTGGCGGGCTTGAGTGCGGGAGAGGGAAGCGGAATTCCCGGTGTAGCGGTGAAATGCGTAGATATCGGGAGGAACACCAGTGGCGAAGGCGGCTTCCTGGACCGCAACTGACGCTGAGGCGCGAAAGCTGGGGGAGCG…
>OTU_1750	AAGTCGTAACAAGGTCTCCGTTGGTGAACCAGCGGAGGGATCATTACCGAAGTTACTCTTCATACCCTTTTGTGAACACTACCCCATTGCCGCGCGTTGCCTCGGCGGGGAGGTCCGCGGGGTTGCGCTCCGGCGCTCCCCCCGGGCCCCCGCCGGCCGCGCCGAACTCTTCATTTGCAAAGCGGACTGTATGTTCTGATTATATCTTGAAAAACAAGTCAAAACTTTCAACAACGGATCTCTTGGTTCTG
>OTU_1751	AAGTCGTAACAAGGTTTCCGTAGGTGAACCTGCGGAAGGATCATTACATATTAAGCAAAGCCGGGTACAAGAGCCACCGCTTCGGCGCAACTCTGTCATGGTGGCGCGAATATTCACCCATGTTTTTGCGTACTTCTTGTTTCCTTGGTGGGCTCGCCCGCCATAGGACAACCATTAAACCTTTTGTAATTGCAGTCAGCGTCAGTAAAATGTAATCGTTACAACTTTCAACAACGGATCTCTTGGTTCTG
>OTU_1753	AAGTCGTAACAAGGTTTCCGTAGGTGAACCTGCGGAAGGATCATTATTGAATGAATTTAGGATTTGGTTTGATGCTGGCCCAAGGGCATGTGCACGCCTTCTCCTTCATCCACACACACCTGTGCACTTGTGAGACGGAGGATTAATTTCTTCCGTCTACTAATCACACAAACTCATTGTAATTGAACTGAATGTAATTGATGTAACACATCTATTTGAACTAAGTTTCAACAACGGATCTCTTGGCTCTC
>OTU_1754	AAGTCGTAACAAGGTTTCCGTAGGTGAACCTGCGGAAGGATCATTACCGAGTGCGGGTCCCGAACTTACTTCGGGGCCCTACCTCCGACCCGTGACTACCGAACCTCTGTTGCTTCGGCGTGTTGGCCTCGTCCCACGAGGCGGCGCCGGAGACCTTCTCCTGAACGCTTGTTTATTTTGAAGGGAATTGCAGTCTGAGTCGAAACGATACAAATCGGTTAAAACTTTCAACAACGGATCTCTTGGTTCCG
>OTU_1755	AAGTCGTAACAAGGTCTCCGTTGGTGAACCAGCGGAGGGATCATTACCGAGTTATACAACTCCCAAACCCACTGTGAACCTTACCAAATCGTTGCTTCGGCGGGACAGCCCCGGGCCCCAGCGGCCCGGAACCAGGCGCCCGCCGGAGGCCAAACAAACTCTTCTGTTTTCTCTTAGCGGAATCTATCTGAGTGGCCCTTCATGGGCAAGCAAATGAATCAAAACTTTCAACAACGGATCTCTTGGTTCTG
>OTU_1756	AAGTCGTAACAAGGTCTCCGTAGGTGAACCTGCGGAGGGATCATTACACAAATATGAAGGCGGGCTGGAACCTCTCGGGGTTACAGCCTTGCTGAATTATTCACCCTTGTCTTTTGCGTACTTCTTGTTTCCTTGGTGGGTTCGCCCACCACTAGGACAAACATAAACCtttttttttATGCAGTTGCAATCAGCGTCAGTAAAAACAATGTAATTAATTACAACTTTCAACAACGGATCTCTTGGTTCTG
>OTU_1757	AAGTCGTAACAAGGTTTCCGTAGGTGAACCTGCGGAAGGATCATTAACAAATCATTTGTGTTCGGTGGTGTAAAAGCCACTGATACATTAGCGCTCTGCCACAAGAGCAGTCCTCGGACTATTCTTGGGCATTGTGTATGTCATGATGTGCGCAAGTACAGATTGGCAAAATAGACGCTTGTATTGTTTGACTGATTACGAGAGAAAACTAAATTAAAAGACAACTTTTAACAATGGATCTCTTGGCTCTT
>OTU_1758	AAGTCGTAACAAGGTCTCCGTTGGTGAACCAGCGGAGGGATCATTACAGAGTTGCAAAACTCCCTAAACCATTGTGAACGTTACCTAAACCGTTGCTTcggcgggcggccccggggtttaccccccgggcgccccctggccccctcgcggggcgcccgccGGAGGAAACCCAACTCTTGATACATTATGGCCTCTCTGAGTCTTCTGTACTGAATAAGTCAAAACTTTCAACAACGGATCTCTTGGTTCTG
>OTU_1759	AAGTCGTAACAAGGTTTCCGTAGGTGAACCTGCGGAAGGATCATTAATGAGTAATTGGGAGCAGCCTTTATAGTATAAAGGTTGTCTTCCAGTCTCTTTAACCCAATGGTAATTTCACTAGTTGCTTTGGCAGTTTGTTTATTCAGCTGCCAAAGGAAATAAACAATGTTGTCCTATAGTTGGCTGTCATTTGTCTGATTAAATACTTTAATAGTAATTTAAAACTTTCAACAACGGATCTCTTGGTTCTG
>OTU_176	AAGTCGTAACAAGGTTTCCGTAGGTGAACCTGCGGAAGGATCATTAACAACGTATCCTAAACGTAAAAAACCCCCCCTGTGAACTTTCATAACCCGAGCTTGCTAGGCCCGCGAAATTCAGCAATCCCTGGTAAATCATTGTTGACCAGCTCTTTGAGTCAGGGATATCCGAACTGTGAAGCAAGAGCGGTGAGGCAAGTGACCCGGTACCCCCAAGCAATCAATGTTCTGTCAGTGTCGTTGATTGTGTAAGGGTGGCGCAGTAAACGATCGCTGGAGGCCACCACGGCCGGCGACTGGGTCAGCGAGCTCTGCTCCTTAATAACCCCACCTAAGGATTAGCTCGGCGAAAGCTTGAGCACCAAAAACTAATACGACTGTTAACAATGGATATCTTGG…
>OTU_1760	AAGTCGTAACAAGGTTTCCGTAGGTGAACCTGCGGAAGGATCATTACCGAGTTAGGGTCTTATTGGCCCGACCTCCAACCCTTTGTTTACTATACCATGTTGCTTTGGCGGGCCCGTCTTTCGGGGCCGCCGGGGGCTTTCACGCCCATGGTCAGTGCCCGCCAGTAGCCTTATTAAATTCTTTAATAATTATGTTGTCTGAGTCTAAATATGAATCGTTAAAACTTTCAACAACGGATCTCTTGGTTCTG
>OTU_1761	AAGTCGTAACAAGGTTTCCGTAGGTGAACCTGCGGAAGGATCATTACCGTGAAGCGGCTGGGGGACCATCCCCCCAGCGCGCCGACCCTGTGTGTACGTTCTGGTTGCTTCGGCGGGCCGTCCGCTCGTCGGCCGCCGGCCTCGGCCGGTGTGCGCCCGCCGGAAGACCGTCCAACCCGGCCTTACGGTGACGTCCGAGCAAAAACATTGAGAAATCAGCAAAACTTTCAACAACGGATCTCTTGGTTCCG
>OTU_1762	AAGTCGTAACAAGGTTTCCGTAGGTGAACCTGCGGAAGGATCATTACCGAGTGCGGGTCCTTTGGGCCCAACCTCCCATCCGTGTCTATTGTACCTTGTTGCTTcggcgcgcccgcctcacggccgccggggggcatccgcccccgggcccgcgcccgccGAAGACACCATTGAACTCTTGTCTGAAGATTGCAGTCTGAGTAGATTAGCTAAATCAGTTAAAACTTTCAACAACGGATCTCTTGGTTCCG
>OTU_1763	AAGTCGTAACAAGGTTTCCGTAGGTGAACCTGCGGAAGGATCATTAACAAATAAAGAATCTTATATTCTTAAACCCCTTCTGAGTACTTGTACTTGTTGCTTCCGTGGTTTGTGAGCATCATGCTTGCATCTACCATTGTGGTGGATCCGCGGAAGGTATACACATATAAACTCTGTCATTTTGTGGTATCAGTCTGAGTATGTTCAAGTAACAAATGTTAAAACTTTCAACAACGGATCTCTTGGTTCTC
>OTU_1764	AAGTCGTAACAAGGTTTCCGTAGGTGAACCTGCGGAAGGATCATTACCGAGTGTAGGGTTCCTAGCGAGCCCAACCTCCCACCCGTGTTTACTGTACCTTAGTTGCTTCGGCGGGCCCGGGGCTGAGAGCCCCCGGCGGCCATGAATGGCGGGCCCGCCGGAGACACCACGAACTCTGTCTGATCTAGTGAAGTCTGAGTTGATTGTATCGCAATCAGTTAAAACTTTCAACAATGGATCTCTTGGTTCCG
>OTU_1765	AAGTCGTAACAAGGTCTCCGTTGGTGAACCAGCGGAGGGATCATTACAGAGTTTCTAAACTCCCATAAACCATTGTGAACGTTACCTCAACCGTTGCTTcggcgggcggccccggggaatacccccgggcgcccccaggccccaccgcgggcgcccgccgGAGGTCACCAAACTCTTGATACCCAAATGGCCTCTCTGAGTCTTCTGTACTGAATAAGTCAAAACTTTCAACAACGGATCTCTTGGTTCTG
>OTU_1766	AAGTCGTAACAAGGTTTCCGTAGGTGAACCTGCGGAAGGATCATTATTGAATCCAAAGGATGTTGCTGGCCTTTCGGGGCATGTGCACTCCACCTTTTCAATACACCTGTGAACTTAGTGTAGGTGCAGATGTAAAAAGTCTGTTGCCTACGTTTTTAATACACCCTTAAAAAGTATATTGAATGTTTAATTGTGGCCTTTGATGGTCAACAAACTTAATACAACTTTCAACAATGGATCTCTTGGTTCTC
>OTU_1768	AAGTCGTAACAAGGTTTCCGTAGGTGAACCTGCGGAAGGATCATTATTGAATCCAAAGGATGTTGCTGGCCTTTCGGGGCATGTGCACTCCACCTTTTCAATACACCTGTGGACTTATTGTAGGTGCAGATGTAAAAAGTCTGTTGCCTATGTTTTAACACACCCCTAAAAAGTTTATTGAATGTCTAATTGTGGCCTTGAATGGTCAACAAAACTTAATACAACTTTCAACAATGGATCTCTTGGTTCTC
>OTU_177	GGGAATTTTCCGCAATGGGCGAAAGCCTGACGGAGCAATGCCGCGTGGAGGTAGAAGGCCCACGGGTCGTGAACTTCTTTTCCCGGAGAAGAAGCAATGACGGTATCTGGGGAATAAGCATCGGCTAACTCTGTGCCAGCAGCCGCGGTAATACAGAGGATGCAAGCGTTATCCGGAATGATTGGGCGTAAAGCGTCTGTAGGTGGCTTTTTAAGTCCGCCGTCAAATCCCAGGGCTCAACCCTGGACAGGCGGTGGAAACTACCAAGCTGGAGTACGGTAGGGGCAGAGGGAATTTCCGGTGGAGCGGTGAAATGCGTAGAGATCGGAAAGAACACCAACGGCGAAAGCACTCTGCTGGGCCGACACTGACACTGAGAGACGAAAGCTAGGGGAGCGA…
>OTU_1770	AAGTCGTAACAAGGTCTCCGTTGGTGAACCAGCGGAGGGATCATTACAGAGTTGCAAAACTCCCTAAACCATTGTGAACGTTACCTTCAAACCGTTGCTTCGGCGGGCGGCCCGGGTCCGCCCGGTGCCCCCTGGCCCCCTAGCGGGGCGCCCGCCGGAGGAAACCCAAACTCTTGTCTTTACAGTGGGATATTCTGAGTAATTATACAAATAAGCAATCAAAACTTTCAGCAACGGATCTCTTGGCTCTG
>OTU_1771	AAGTCGTAACAAGGTTTCCGTAGGTGAACCTGCGGAAGGATCATTAACAACGTATCCTAAACGTAAAAAACCCCCCCTGTGAACGTTACCTTCAAACCGTTGCTTCGGCGGGAGGCCCGGGTCCGCCCGGTGCCCCCTGGCCCCCTAGCGGGGCGCCCGCCGGAGGAAACCCAACTCTTGATTATTATGGCCTCTCTGAGTCTTCTGTACTGAATAAGTCAAAACTTTCAACAACGGATCTCTTGGTTCTG
>OTU_1772	AAGTCGTAACAAGGTCTCCGTTGGTGAACCAGCGGAGGGATCATTACAGAGTTGCAAAACTCCCTAAACCCATTGTGAACGTTACCTAAACCGTTGCTTcggcgggcggccccggggtttaccccccgggcgcccctgggccccaccgcgggcgcccgccGGAGGAAAACCCAACTCTTGATTATTATGGCCTCTCTGAGTCTTCTGTACTGAATAAGTCAAAACTTTCAACAACGGATCTCTTGGTTCTG
>OTU_1775	AAGTCGTAACAAGGTTTCCGTAGGTGAACCTGCGGAAGGATCATTCATAATCAAGTGTTTTTATGGCACTTTCAAAAATCCATATCCACCTTGTGTGCAATGTCATCTCACTGGAGGCCAGCGGCTGTAAAAAGCCCGTTTGGTCGCCTTTGGGATTTATATCTACTCAGAACTTTAGTGATTTTGTCTGAAAAATATTATGAATAACTTAATTCAAAATACAACTTTCAACAACGGATCTCTTGGCTCTC
>OTU_1776	AAGTCGTAACAAGGTCTCCGTTGGTGAACCAGCGGAGGGATCATTACCGAGTTGCAAAACTCCCTAAACCCATCGTTTATCTATCTCGAAAACGTCTGCTTCGGCGGGCGGGCCCCAGGGCGGGGCCGCAGCCCGTCGTCTAGCGCGTCGGGCGCCCGCCGGAGAGGGCAACCCAAAACTCTTGTTTTCAGTACAACTCTGAGCATAAAGACAAATAGTCAAAACTTTCAACAACGGATCTCTTGGTTCTG
>OTU_1777	AAGTCGTAACAAGGTTTCCGTAGGTGAACCTGCGGAAGGATCATTAACGAGTGCTCTTGCCCTTGTGGCAGAACCTCCCACCCTGTGCGTACCAACCCTTGTTGCTTTGGCAGGTCCGTCCTCTCGGGGACCGCCGGCACCCTCGGGTGCGGGCCCGTGCCTGCCAGAGACCTACCAAACTCTGTTATAACATGTCGTCCGAGTTAATTGCAAAATCGTTAAAACTTTCAACAACGGATCTCTTGGTTCTG
>OTU_1779	AAGTCGTAACAAGGTTTCCGTAGGTGAACCTGCGGAAGGATCATTACCGAGTTAGGGTCTTATAGGCCCGACCTCCAACCCTTTGTTTACTATACTATGTTGCTTTGGTGAGTCCGCCTCTCGGGGCCGCTGGGGACTTTCATGCCTCTAGTCAGTGCTCGCCAGTAGCCTTCTTAAATCCTTTTATAACTATGTCGTCTGAATATAAATATAAATCGTTAAAACTTTCAACAACGGATCTCTTGGTTCTG
>OTU_178	AAGTCGTAACAAGGTTTCCGTAGGTGAACCTGCGGAAGGATCATTAACAACGTCCCCTGTGAACTTTCATAACCCGAGCTTGCTAGGCCCGCGAAATTCAGCAATCCCTGGTAAATCATTGTTGACCAGCTCTTTGAGTCAGGGATATCCGAACTAGTCGTGTGGATTAAGTTCCGTGAAGCAAGAGCGGTGAGGCAAGTGACCCGGTACCCCCAAGCAATCAATGTTCTGTCAGTGTCGTTGATTGTGTAAGGGTGGCGCAGTAAACGATCGCTGGAGGCCACCACGGCCGGCGACTGGGTCAGCGAGCTCTGCTCCTTAATAACCCCACCTAAGGATTAGCTCGGCGAAAGCTTGAGCACCAAAAACTAATACGACTGTTAACAATGGATATCTTGG…
>OTU_1780	AAGTCGTAACAAGGTCTCCGTTGGTGAACCAGCGGAGGGATCATTAAAGAGTTGCAAAACTCCCTTAAACCATCGCGAACGTTACCACATACCGTTGCTTCGGCGGGCAGGCACCCCCCTAGGGGGGCGCCTCACCCGGCCCCTCGTGGGCGCTCGCCGGAGGGACACAACCAAACTATTATAATTATTGGCCTCTCTGAGTAAGATTTTTAAATAAGTCAAAACTTTCAACAACGGATCTCTTGGTTCTG
>OTU_1781	AAGTCGTAACAAGGTCTCCGTTGGTGAACCAGCGGAGGGATCATTACAGAGTTGAAAAACTCCCTAAACCATTGTGAACGTTACCCAAACCGTTGCTTcggcgggcggcgcccgggcctcaccgcccgcggcgccccccggccccccgtgggcgcccgccGGAGGTACACCAAACTCTTGCATTGTATGGCCTCTCTGAGTATTCTGTACTGAATAAGTCAAAACTTTCAACAACGGATCTCTTGGTTCTG
>OTU_1782	AAGTCGTAACAAGGTCTCCGTTGGTGAACCAGCGGAGGGATCATTAAAGAGTTGCAAAACTCCCAAACCATTGTGGACCTACCTTACAACCGTTGCTTCGGCGGGTGGCGCTCCCTCACCCGGAGCGCCGCGCCGGCCCCTCCCCGGGGCCCGGCAACCCGTCAGAGGCCCGCAACTCTTAGTCATCATTGGCCTCTCTGAGTAACTTATACAATAAGTAAAAACTTTCAACAACGGATCTCTTGGTTCTG
>OTU_1783	AAGTCGTAACAAGGTTTCCGTAGGTGAACCTGCGGAAGGATCATTACCGAGTGAGGGCCCTCTGGGTCCAACCTCCCACCCGTGTTTATCGTACCTTGTTGCTTCGGCGGGCCCGCCGCAAGGCCGCCGGGGGGCTTCCGTCCCCGGGTCCGCGCCCGCCGAAGACACCTGTGAACGCTGTCTGAAGATTGCAGTCTGAGCGAAAAGCTAAAATGTATTAAAACTTTCAACAACGGATCTCTTGGTTCCG
>OTU_1784	AAGTCGTAACAAGGTTTCCGTAGGTGAACCTGCGGAAGGATCATTATCAATACAATATCGGACGGCCGGGGTTGTGGGAAACACCATGACCTAGGCCCATCCCCTATTGCACCCTTTGTCTTTGCGTACTGTATGTTTCCTCGGTGGGCTCGCCCGCCGATAGGACATTCTATAAACCCTTTGTAATTGCAATCAGCGTCAGAAAAAACTATAATAGTTACAACTTTCAACAACGGATCTCTTGGTTCTG
>OTU_1785	AAGTCGTAACAAGGTCTCCGTTGGTGAACCAGCGGAGGGATCATTACTGAGTTACCGCTCTATAACCCTTTGTGAACATACCTAACTGTTGCTTCGGCGGGCAGGGGGTGCCGCCTGCGGACCCCCCTCCCGGCCCTGCCCTCACGGGCGGAGCGCCCGCCGGAGGATACCAAACTCTATTTTAACGACGTTTCTTCTGAGTGGCACAAGCAAATAATTAAAACTTTCAACAACGGATCTCTTGGTTCTG
>OTU_1786	AAGTCGTAACAAGGTTTCCGTAGGTGAACCTGCGGAAGGATCATTATAGTATATGGAATCTCCATTCTATAAACACCATCTGTGTATTTTTTACCTGTTGCTTCCATGGGCCTTGAGCCTCGCGTTTGCATCGGCTGAATGGCTGGTGAGCGCCCATGGAAGGAAAACAATAACTCTCTTTTATGTGAATTAAGTCTGAACATGTTTTATATAAACGTTAAAACTTTCAACAACGGATCTCTTGGTTCTC
>OTU_1787	AAGTCGTAACAAGGTTTCCGTAGGTGAACCTGCGGAAGGATCATTACTGAGTGAGGGCCCTCTGGGTCCAACCTCCCACCCGTGTCTCTTGTACCATGTTGCTTCGGCGAGCCCGCCTCACGGCCGCCGGGGGGCATCTGCCCCCGGGCCCGCGCCCGCCGAAGCCCCCTCTGAACGCTGTCTGAAGATTGCAGTCTGAGCGATAAGCAAAAATTATTTAAAACTTTCAACAACGGATCTCTTGGTTCCG
>OTU_1788	AAGTCGTAACAAGGTTTCCGTAGGTGAACCTGCGGAAGGATCATTACCGAGTGCGGGCCCTCTGGGTCCAACCTCCCACCCGTGTCTATTATACCTTGTTGCTTCGGCGGGCCCGCCGCAAGGCCGCCCGGGGGCTCCCGCCTCCAGGCCCGCGCCCGCCGGAGACCCCCCTATGAACACTGTGTGAAGTTGCAGTCTGAGCGATTAGCTAAATCGGTTAAAACTTTCAACAACGGATCTCTTGGTTCCG
>OTU_1789	AAGTCGTAACAAGGTCTCCGTTGGTGAACCAGCGGAGGGATCATTACAGAGTCGCAATACTCCGTAAACCATTGTGAACGTTACCTAACCGTTGCTtcggcgggcggcgcccgggccctcgcggcccgcggcgccccccggcccctgcgggcgcccgccGGAGGTAGACCAAACTCTTGAATTACATGGCCTCTCTGAGTCTTCTGTACTGAATAAGTCAAAACTTTCAACAACGGATCTCTTGGTTCTG
>OTU_179	AAGTCGTAACAAGGTTTCCGTAGGTGAACCTGCGGAAGGATCATTAACAACGTATCCTAAACGTAAAAAACCCCCCCTGTGAACTTTCATAACCCGAGCTTGCTAGGCCCGCGAAATTCAGCAATCCCTGGTAAATCATTGTTGACCAGCTCTTTGAGTCAGGGATATCCGAACTAGTCGTGTGGATTAAGTTCCGTGAAGCAAGAGCGGTGAGGCAAGTGACCCGGTACCCCCAAGCAATCAATGTTCTGTCAGTGTCGTTGATTGTGTAAGGGTGGCGCAGTAAACGATCGCTGGAGGCCACCACGGCCGGCGACTGGGTCAGCGAGCTCTGCTCCTTAATAACGGCGAAAGCTTGAGCACCAAAAACTAATACGACGTTAACAATGGATATCTTGG…
>OTU_1790	AAAGTCGTAACAAGGTTTCCGTAGGTGAACCTGCGGAAGGATCATTAATGTATATTGAATTTTATATTCTTTATCAACCCACACTGTGTACCTTTTTACTGTTGCTTCCATGGGACATGGCTCTGCCACGTCGGCCTTATGGCTGGTGAGCGCCCATGGGAGGAAAACAAAACTCTTTGTTACAATTGAAGTCTGTCTGAATTGTTTATATTAAACGTTAAAACTTTCAACAACGGATCTCTTGGTTCTC
>OTU_1791	AAGTCGTAACAAGGTCTCCGTTGGTGAACCAGCGGAGGGATCATTACAGGGTCTAACGACTGCCCAAACCCAACCGTGAACTACTCCTTCAAACATATGCTTCGGCGGGCCGCTCGCTGGGGGAGCCCCGGGCCGCTTCGGCGGTGACCCGCCGCAGGCATCCAAACTAAACCTTTTCCGAGATTGCTCTGAGAAAATACTTTCTAAATGAAAATAATCACAACTCATAACAATGGATCTCTTGGCTCTG
>OTU_1792	AAGTCGTAACAAGGTTTCCGTAGGTGAACCTGCGGAAGGATCATTACCGAGTGAAAAGTCGCTCGACCGTGCTGGCGGAAACGCATGTGCACGTCGGTCGCAAAATCTCATCCACACACCTGTGAATCTATGGCCTTCGGGTCTCTGACCCGGGGGCAACCttttttttACCCACTCTGTTCGTAAAGGAATGTCATACGTGTGATAAACACAAATGAAACAACTTTCAACAACGGATCTCTTGGCTCTC
>OTU_1793	AAGTCGTAACAAGGTCTCCGTTGGTGAACCAGCGGAGGGATCATTACCGAGTTTACAACTCCCAAACCCCATGTGAACCTTACCAACCTGTTGCTTCGGCGGGACTCGCCCCGGGCGCGGCCGCGAGGCCGGCCCCGGACCAAGGCGCCCGCCGGAGGACCCAAACTCTTTGTTTCTGCAAGCGGATTCTTCTGAGTGGCTATAAGCAACAAATAAATCAAAACTTTCAACAATGGATCTCTTGGTTCTG
>OTU_1794	AAGTCGTAACAAGGTTTCCGTAGGTGAACCTGCGGAAGGATCATTACAGAATTTTGAGAATTGTGCTTAACTGCACTTTTCTTATCTACACACGTGTTTTTGTTTTATTCTTAAAACTTGCTTTGGCAGTGGCTGCTTAATTGCTCTGCTGCCAGAGGATAAACTCAACCTAAATTTTTTATTTTAAACTAGTCAACTGATTATATTTATTAATAGTCAAAACTTTCAACAACGGATCTCTTGGTTCTCG
>OTU_1795	AAGTCGTAACAAGGTCTCCGTTGGTGAACCAGCGGAGGGATCATTACAAGAAGCCGAAAGGCTACTTCAAACCATCGCGAACTCGTCCAAGTTGCTTCGGCGGCGCGGCACCCCTTAACGGGGGCGCCGCAGCCCTGCCTCTCCGGAGGTTCGGGGCGCCCGCCGGAGGTACGAAACTCTGTATTATAGTGGCATCTCTGAGTATAAAACAAATAAGTTAAAACTTTCAACAACGGATCTCTTGGTTCTG
>OTU_1796	AAGTCGTAACAAGGTCTCCGTTGGTGAACCAGCGGAGGGATCATTACCGAGTTTACACTCCCAACCCTTTGTGAACCTTACCTACCGTTGCTTCGGCGGACCGCCCCGGGCGCTGCGTGCCCCGGACCCAGGCGCCCGCCGGGGACCACCCAAACCCTGTTTTTGTTTTCAAAACATGTGTATCTTCTGAGCGAGCCGAAAGGCGCaaaaaaaaCAATCAAAACTTTCAACAACGGATCTCTTGGTTCTG
>OTU_1797	AAGTCGTAACAAGGTTTCCGTAGGTGAACCTGCGGAAGGATCATTACCGAGTGAGGGCCCTTTGGGTCCAACCTCCCACCCGTGTTTATTTACCTCGTTGCTTCGGCGGGCCCGCCTTAACTGGCCGCCGGGGGGCTCACGCCCCCGGGCCCGCGCCCGCCGAAGACACCCCCGAACTCTGCCTGAAGATTGTCGTCTGAGTGAAAATATAAATTATTTAAAACTTTCAACAACGGATCTCTTGGTTCCG
>OTU_1798	AAGTCGTAACAAGGTCTCCGTTGGTGAACCAGCGGAGGGATCATTAAAAGAAGCCGAAAGGCTACTTATAACCATCGTGAACTCGTCCAAGTTGCTTCGGCGGCGCGGTGCCCTTCTGGGGCGCCGCAGTCCGGCCCCCTCGGGGGTGCGGGGCGCCCGCCGGAGGTACAAAACCCTTCTGTATTATAGTGGAATTCTGATTAAACAAACAAATAAGTTAAAACTTTCAACAACGGATCTCTTGGTTCTG
>OTU_1799	AAGTCGTAACAAGGTTTCCGTAGGTGAACCTGCGGAAGGATCATTATAGTATATGGAATCTCCATTCTATAAACACCATCTGCGTATTTTATACCTGTTGCTTCCATGGGCCTTGGGCCTAGCGCCCGCATCGGCCCGACGGCTGGTGAGTGCCCATGGAAGAAAAACATAAACCCTCTTTTTTATGAATCAAGTCTGAAATTGTTTATTATAAACGTTAAAACTTTCAACAACGGATCTCTTGGTTCTC
>OTU_18	AAGTCGTAACAAGGTTTCCGTAGGTGAACCTGCGGAAGGATCATTAGTGAACGCCCTTCATGGGCTTAAACTATTCCAAACCTCTGTGAACCGTGCCCTTCGGGGCTAATTTTACAAACATGGTGTAATGAACGTCATAACTTTAACAAAACAAAACTTTCAACAACGGATCTCTTGGCTCTCGCATCGATGAAGAACGCAAACAACGGTAGATCGCCTTGGTCATTTAGAGGAAGTAAAAGTCGTAACAAGGTCTCCGTTGGTGAACCAGCGGAGGGATCATTACCGAGTTTACAACTCCCAAACCCCTGTGAACATACCACTTGTTGCCTCGGCGGATCAGCCCGCTCCCGGTAAAACGGGACGGCCCGCCAGAGGACCCCTAAACTCTGTTTCTAT…
>OTU_180	GGGAATCTTTCACAATGGGCGAAAGCCTGATGGAGCAACGCCGCGTGCAGGATGAAGGCCTTCGGGTTGTAAACTGCTTTTATAAGCGAGAAATATGATGGTAACTTATGAATAAGGATCGGCTAACTACGTGCCAGCAGCCGCGGTCATACGTAGGATCCGAGCATTATCCGGAGTGACTGGGTGTAAAGAGTTGCGTAGGTGGCATAATAAGTAGCTAGTGAAATCTGGTGGCTCAACCATTCAGACTATTAGCTAAACTGTTAAGCTCGAGACCGTTAGGGGTAACTGGAATTTCTAGTGTAGGGTTGAAATCCGTAGATATTAGAAGGAACACCAATAGCGTAGGCAGGTTACTGGGACGGTTCTGACACTAAGGCACGAAAGCGTAGGGAGCAA…
>OTU_1800	AAAGTCGTAACAAGGTTTCCGTAGGTGAACCTGCGGAAGGATCATTACCGAGCGAGGGCCCTCTGGGTCCAACCTCCCACCCGTGTTTATCGTACCTTGTTGCTTCGGCGGGCCCGCCTCACGGCCGCCGGGGGGCTTCTGCCCTCTGGCCCGCGCCCGCCGAAGACACCATTGAACGCTGTCTGAAGATTGCAGTCTGAGCAATTAGCTAAATAAGTTAAAACTTTCAACAACGGATCTCTTGGTTCCG
>OTU_1801	AAAGTCGTAACAAGGTCTCCGTTGGTGAACCAGCGGAGGGATCATTACCGAAGTTACCTTCAAAACCCACTGTGAACCTTACCTCTTGCCGCGTTGTCTCGGCGGGAGGCGGTGTGCGTCGCGCGCCCTAGCGGGCCGCGCCGCTCCCGTCCCCGCCGGCAGCGCCAAACTCTAAATGCACAGCGGACTGTACGTTCTGATTTACaaaaaaaaCAAGTTAAAACTTTCAACAACGGATCTCTTGGTTCTG
>OTU_1802	AAGTCGTAACAAGGTTTCCGTAGGTGAACCTGCGGAAGGATCATTACCGAGTGAGGGCCCTCTGGGTCCAACCTCCCACCCGTGTTTATCGTACCTTGTTGCTTCGGTGGGCCCGCCATTCTGGCCGCCGGGGGGCACCCGCCCCCGGGCCCGCGTCCGCCGAAGACACCATTGAACGCTGTCTGAAGATTGTCGTCTGAGCGATTAGCTAAATCAGTTAAAACTTTCAACAACGGATCTCTTGGTTCCG
>OTU_1803	AAGTCGTAACAAGGTTTCCGTAGGTGAACCTGCGGAAGGATCATTACCGAGTGAGGGCCCTCCGGGTCCAACCTCCCACCCGTGTTTATCGTACCTAGTTGCTTcggcgggcccgccgttatggccgccggggggcacccgcccccgggcccgcgcccgccgaagccccccTGGAACGCTGTCTGAAGATTGCAGTCTGAGCGATTAGCTAAATCAGTTAAAACTTTCAACAACGGATCTCTTGGTTCTG
>OTU_1804	AAGTCGTAACAAGGTTTCCGTAGGTGAACCTGCGGAAGGATCATTACCGAGTGTCGGCCCCTCCGGGGCCACCCTCCCACCCGTGTCTACCGTCCCTTGTTGCTTCGGCGGGCCCGCCCCTTGGGGGCTGCCGGGGGGCCTCGTGCCCCCGGGCTCCCGCCGGAGACGTCCACGCGAACCCTGTCTGAAGGTTGCCGTCTGAGTGTTGATGCAATCGTCAAAACTTTCAACAACGGATCTCTTGGTTCCG
>OTU_1805	AAGTCGTAACAAGGTCTCCGTTGGTGAACCAGCGGAGGGATCATTAAAAGAAGCCGAAAGGCAACTTCAAACCATCGCGAACCTATCCAAGTTGCTTCGGCGGTGCGGCACCCCCCGCGGTGTCGCGGCCCGCGGCCCTCCGGGGTCCAGGGCGCCCGCCGGAGGCCTTAAACTCTCATGTATTATAGTGGCATCTCTGAGTAACAAAACAAATAAGTTAAAACTTTCAACAACGGATCTCTTGGTTCTG
>OTU_1806	AAGTCGTAACAAGGTTTCCGTAGGTGAACCTGCGGAAGGATCATTACAAAAGTTAAACACTTGGGGAACGGACTCGCCTTTCGGGGCTCGAGGCCTGACTCCATTTGTAACAAACTTTCAACCACTTGTGAATTTGTAATAATTATATCTCACCAATTGACTGTTAACGAAGTCTGATTCAAATTGCATTGGTGTTTATAGACACTAGTAAAATATGAAACAACTTTTGGCAACGGATCTCTTGGCTCTC
>OTU_1807	AAGTCGTAACAAGGTCTCCGTTGGTGAACCAGCGGAGGGATCATTACAGAGTTGCAAAACTCCCTAAACCATTGTGAACGTTACCTTCAAACCGTTGCTtcggcgggcggcgccgggtccgcccggcgcccctcggcccccctcgcgggggcgcccgccGGAGGAAACCCAACTCTTGATACTTTATGGCCTCTCTGAGTCTTCTGTACTGAATAAGTCAAAACTTTCAACAACGGATCTCTTGGTTCTG
>OTU_1808	AAGTCGTAACAAGGTCTCCGTTGGTGAACCAGCGGAGGGATCATTATTGAGTTGCAAAACTCCCTAAACCCATTGTTTACATATCTCGAAATACGTCTGCTTCGGCGGGCGGCCCCAGGGCGGGGCCGCAGTTCGTCGCCTAGTGCGTTGAGCGCCCGCCGGAGAGGACACCCCAAAACTCTTGTTTCAGTACAACTCTGAGCATAAAGACAAATAGTCAAAACTTTCAACAACGGATCTCTTGGTTCTG
>OTU_1809	AAGTCGTAACAAGGTTTCCGTAGGTGAACCTGCGGAAGGATCATTAACACTTACCTGCTTTATACTAGCAATAGTATAAATCATGTATAACACAAACCCGTGCTCCttttttttCCACACCATTAACCCAACTTTTAAATAAAACTTTATATCTATAACGATCTACAAGATTCAATTCTTGTGGGGTTGCTATATTCATAGTCTAATCTATGTTTAAACACAACTCTTAACAATGGATATCTTGGCTCTC
>OTU_181	AAGTCGTAACAAGGTTTCCGTAGGTGAACCTGCGGAAGGATCATTAACACGTATCCAAACGTTAACCCCCCTGTGAACCTTTAGTGTGCTCGTACGCTTTGTCAGAGCGTGGCAATCCCTAGTAAATCATCGCCGAACAGTTTTCGATTTAGGGACTTCCACAAAGAGTGTGCTCGTAGCGCGAGGCAAGTGGCCTGGCATTCCCAAGCAGTTGGTGTCTGAAAGTGTCACTGGCTGTGTAAGGATGGCGCAGTCACGATCGTTGGAGGCCGACACGGCCGACGACCGGGTCACCGGGCTCACGCCCCTTAATCACAACTTAATGCATGTCAGACGCGCCTGCGCTTAATTGTGCGGCGACCATAAAACTCGAACAACTGTTAACAATGGATATCTTGG…
>OTU_1810	AAGTCGTAACAAGGTTTCCGTAGGTGAACCTGCGGAAGGATCATTAAAAGATTAAGAATTGTATATTCTTAAACCCATTCTGAGTACTTGAACTTGTTGCTTCCGTGGGGAGCATGAGCATATGCACTTGCACCTGCGCTTGTAGGTATCCCACGGAAGGTATTCATAACCCCTGTATTTTTGTGATATCAGTCTGAGCATGTTTATTCAATAAACGTTAAAACTTTCAACAACGGATCTCTTGGTTCTC
>OTU_1811	AAGTCGTAACAAGGTCTCCGTTGGTGAACCAGCGGAGGGATCATTACTGAGTCTACGAACTCCCAAACCACTGTGAACATACCCCACGTTGCTTCGGCGGCCACGCCCCGGGGGACGCAGCGCCCCGGCGCCGCTCCCCCCCGGACCCAGGCGCCCGCCGGAGGCCCCAAACACCACTGTAAACTTTGTACGAATCTGAGTGGCATAAGCAAATAAATCAAAACTTTCAGCAACGGATCTCTTGGTTCTG
>OTU_1812	AAGTCGTAACAAGGTTTCCGTAGGTGAACCTGCGGAAGGATCATTCATAAATGAGTGTTTTATGGCACTCTTTAAAAATCCATATCCACCTTGTGTGCAATGTCATCTCACTGGAAGGTCACGGCTGTAAAAATCCGGCGGCCAACCTTTGGGATTTATATCTACTCAGAACTTTAGTGATTTTGTCTGAAACATATTATGAATAACTTAATTCAAAATACAACTTTCAACAACGGATCTCTTGGCTCTC
>OTU_1813	AAGTCGTAACAAGGTTTCCGTAGGTGAACCTGCGGAAGGATCATTCATAATCAAGTGTTTTTATGGCACTTTCAAAAATCCATATCCACCTTGTGTGCAATGTCATCTCTCTGGGGGCCGCCGGATGTCAAAAGCCGTGTGGTCACCTTTGGGATTTATATCTACTCAGAACTTTAGTGATTTTGTCTGAAAAATATTATGAATAACTTAATTCAAAATACAACTTTCAACAACGGATCTCTTGGCTCTC
>OTU_1814	AAGTCGTAACAAGGTTTCCGTAGGTGAACCTGCGGAAGGATCATTAACAAATCTCTGCGTGCAGTACAGCCGAAAGGCTGCTACCAGCACACATAAGCACCCTAGGGCACACGCCCTAGTGTGAGGGGGACCTACGGAGCAATCCAGCGGTCCCCACAGGTCATTCGTGACCACATTAACGCTTGTTTGTTTGACAGAGTTATGTGAATACACAAATTGACAACTTTTAACAATGGATCTCTTGGCTCTT
>OTU_1815	AAGTCGTAACAAGGTTTCCGTAGGTGAACCTGCGGAAGGATCATTACCGAGTGAGGGCCCTCTGGGTCCAACCTCCCACCCGTGTTTATCGTACCTTGTTGCTTCGGCGGGCCCGCCTCACGGCCGCCGGGGGGCTTCTGCCCTCGGGCCCGCGCCCGCCGAAGACCCCCCTGAACGCTGTCTGAAGATTTGCAGTCTGAGCGATTAGCTAAATCAGTTAAAACTTTCAACAACGGATCTCTTGGTTCCG
>OTU_1816	AAGTCGTAACAAGGTAACCGTAGGTGAACCTGCGGTTGGATCATTACTGATTTTTGAGGGAGTCAAGGTTTGATGCTCTATTATTGAGCTCATCTTTTCTTTACCTCTTTCACACTTTGTGCAATTTGATGTTTTTTGGGTTTATGTTTTTCATAAGCCCAGCTTCATATTAAACCATTGTTTTCTTTATGTCTGAATATCGTAAATTAAAAATCGATAACAACTTTTGACAACGGATCTCTTGGCTCTC
>OTU_1817	AAGTCGTAACAAGGTCTCCGTTGGTGAACCAGCGGAGGGATCATTATTAGAAGCCGAAAGGCTACTTAAAACCATCGCGAACTCATCCAAGTTGCTTCGGCGGTTGCGGCGTTCCCTCACGGGGCGCCGCGGCCCCGCCTCTCCGGAGGTGTGGGGCGCCCGCCGGAGGTACGAAACTCTGTATTATAGTGGCATCTCTGAGTAAAAAACAAATAAGTTAAAACTTTCAACAACGGATCTCTTGGTTCTG
>OTU_1818	AAGTCGTAACAAGGTTTCCGTAGGTGAACCTGCGGAAGGATCATTAGTGAATATTAGGGCGTCTACTTCGGTAGGGCCTGACTTCCACTTTCTAACTCTGTGCACTTATTTGGCGGAAAAGGGAATTAGTAATCTGTCTAATGACGATTGCGACTTCTTACTTTCTGCGGCTTACTTTAAACACTAGTCAAAGTATGTAACGAAATATCGAAACAAATAAAAACTTTCAACAACGGATCTCTTGGCTCTC
>OTU_1819	AAGTCGTAACAAGGTCTCCGTTGGTGAACCAGCGGAGGGATCATTACAGAGTTGCAAAACTCCCAACCATTGTGAACCTACCTCACCGTTGCTTCGGCGGGTGGCGCCCCCTCACCCGGAGCGCCGCGCCGGCCCCCGCTCTCGGGGCCCGGCAAACCCGTCAGAAGACCGAAACTCTTCGTCATCAGTGGCCTCTCTGAGTAACTTATACAATAAGTCAAAACTTTCAACAACGGATCTCTTGGTTCTG
>OTU_182	GGGAATATTGCACAATGGGGGAAACCCTGATGCAGCAACGCCGCGTGAGCGACGAAGGCCTTCGGGTTGTAAAGCTCTGTCTTCGCTGACGAAACAATGACGGTAAGCGAGGAGGAAGCCACGGCTAACTACGTGCCAGCAGCCGCGGTAATACGTAGGTGGCAAGCGTTGTCCGGAATTATTGGGCGTAAAGGGTGCGTAGGCGGTTTTTTAAGTGGGATGTGAAATACCTAGGCTTAACTTAGGAATGGCATTCCAAACTGGAAGACTAGAGTGCAGGAGAGGAAAGTGGAATTCCCAGTGTAGCGGTGAAATGCGTAGAGATTGGGAGGAACACCAGTGGCGAAGGCGACTTTCTGGACTGTAACTGACGCTGAGGCACGAAAGCGTGGGGAGCAA…
>OTU_1820	AAGTCGTAACAAGGTCTCCGTTGGTGAACCAGCGGAGGGATCATTAAAGAGTTGCAAAACTCCCAAACCATTGTGAACCTACCTCACCGTTGCTTCGGCGGGTGGCCCCGGGGCAACCCGGAGCCGCGCCGGCCCCCGCTCTCGGGGCCCGGCAAACCCGTCAGAAGACCGAAACTCTTCGTCATCAGTGGCCTCTCTGAGTAACTTATACAATAAGTCAAAACTTTCAACAACGGATCTCTTGGTTCTG
>OTU_1821	AAGTCGTAACAAGGTCTCCGTTGGTGAACCAGCGGAGGGATCATTACAGAGTTGCAAAACTCCCAACCATTGTGAACCTACCTCACCGTTGCTTCGGCGGGTGGCGCCCCCTCACCGGAAGCGCCGCGCCGGCCCCCTCACCGGGGCCCGGCAACCCGTCAGAGGCCCGCAACTCTTAGTCATCATTGGCCTCTCTGAGTCTTCTGTACTGAATAAGTCAAAACTTTCAACAACGGATCTCTTGGTTCTG
>OTU_1822	AAGTCGTAACAAGGTTTCCGTAGGTGAACCTGCGGAAGGATCATTACCACTGTCAAAGGGCGTGTTTTCCGAGAGGTCTCGCGCCCGGCCATTGAGAAATGGTTTACCCTTGCTTATCGAAGTACCGTTACGTTTCCTCGGCGAGCTCGCTCGCCAATGGGGACTCCAAACCAAACTCTTTGCAGTAGCAATTCTAGTCTGAAACAAAACAAATCAATCAAAACTTTCAACAACGGATCTCTTGGTTCTG
>OTU_1823	AAGTCGTAACAAGGTTTCCGTAGGTGAACCTGCGGAAGGATCATTACAGTAGTCGCCCGGGTTGCCGCAAGGCCTCCCGGGTAACCTACCACCCTTTGTTTATTACACTTTGTTGCTTTGGCAAGCCTGCCCTCGGGCTGCTGGCTCCGGCCGGCGAGCGCTTGCCAGAGGACCTAAACTCTGTTTCTATATGTAACTTCTGAGTACTATATAATAGTTAAAACTTTCAACAACGGATCTCTTGGTTCTG
>OTU_1824	AAGTCGTAACAAGGTTTCCGTAGGTGAACCTGCGGAAGGATCATTACTGAGTGAGGGCCCTCTGGGTCCAACCTCCCACCCGTGTTTATCGTACCTTGTTGCTTCGGCGGGCCCGCCTCACGGCCGCCGGGGGGCACTCGCCCCCGGGCCCGCGCCCGCCGAAGACACCATTGAACTCTGTCTGAAGATTGCAGTCTGAGTAGATTAGCTAAATCAGTTAAAACTTTCAACAACGGATCTCTTGGCTCTG
>OTU_1825	AAGTCGTAACAAGGTCTCCGTTGGTGAACCAGCGGAGGGATCATTACTGAGTTACCGCTCTATAACCCTTTGTGAACATACCTAACTGTTGCTTCGGCGGGCAGGGGGTCCCCTCGGGGACGCCCTCCCGGCCACGCCCTTCACGGGGCGAGGCGCCCGCCGGAGGATACCAAACTCTATTTTAACGACGTTTCTTCTGAGTGGCACAAGCAAATAATTAAAACTTTTAACAACGGATCTCTTGGTTCTG
>OTU_1826	AAGTCGTAACAAGGTTTCCGTAGGTGAACCTGCGGAAGGATCATTATAGTATATGGAATCTCCATTCTATAAACACCATCTGCGTATTTTATACCTGTTGCTTCCATGGGCCTTGAGCCCAGCGTTCGCATCGGCCTAACAGCTGGTGAGCGCCCATGGGAGGATAACATAAACCCTCTTTTTTGTGAACTAAGTCTGAGCTTGTTTAATATAAACGTTAAAACTTTCAACAACGGATCTCTTGGTTCTC
>OTU_1827	AAGTCGTAACAAGGTCTCCGTTGGTGAACCAGCGGAGGGATCATTACAAGAAGCCGAAAGGCTACTTCAAACCATCGTGAACTTATCCAAGTTGCTTCGGCGGCGCGGCTCCCCTCGCGGGGTGCCGCAGCCCCGCCCCCTCGGGGGTGGTGGGCGCCCGCCGGAGGTATTAAACTCTCCTGTATTATAGTGGTATTTCTGAGTAAAAACAAATAAGTTAAAACTTTCAACAACGGATCTCTTGGTTCTG
>OTU_1828	AAGTCGTAACAAGGTTTCCGTAGGTGAACCTGCGGAAGGATCATTACCGAGTGCGGGTCCTTCGGGGCCCAACCTCCCACCCGTGTCTACCGTACCGTGTTGCTTCGGCGGGCCCGCCGCAAGGCCGCCGGGGGGGCGTCCCCCCGGCCCGTGCCCGCCGGAGACCCTGTGAACGCTGATCTGTGAAGGCGTGTCGTCTGAGTCGCGTGAGAAATCGTGAAAACTTTCAACAACGGATCTCTTGGTTCCG
>OTU_1829	AAGTCGTAACAAGGTCTCCGTTGGTGAACCAGCGGAGGGATCATTACCGAGTGAGGGCCCTCTGGGTCCAACCTCCCACCCGTGTTTATCATACCTAGTTGCTTcggcgggcccgccgtcatggccgccggggggcacccgcccccgggcccgcgcccgcCGAAGACACCAATGAACTCTGTCTGAAGATTGCAGTCTGAGCGATTAGCTAAATCAGTTAAAACTTTCAACAACGGATCTCTTGGTTCCG
>OTU_183	AAGTCGTAACAAGGTTTCCGTAGGTGAACCTGCGGAAGGATCATTAACACGTATCCAACGTTAAACAACCCTGTGAACTTTCAGCCTGCTCTTGTATCCCATGAGGAACAGCAATCCCGGTAAATCATTGCCGAACAGTTTTGATTCGGGACCTCTGTCCAAAAGGAGTTACAATTGAGCGGTAGAGGCAGTGGCATGGCTTCCCCAAGCGGTTAGTGAATGACAGTGTCACTGGCTGTGTAAGGATAACGCCTCACGGTTGCTAGAGGTCGATCACCGACCGGCAGACATGTCACAGGGTCACCACGCCCCTTAATAACCCCACTTTTTAATGCCCCGCCTAGTGGTAACGCGCTAGGTaaaaaaaaCCGAACAACTGTTAACAATGGATATCTTGGT…
>OTU_1831	AAGTCGTAACAAGGTTTCCGTAGGTGAACCTGCGGAAGGATCATTATTGAATCCTCAGGATGTTGCTGGCCTTTCGGGGCATGTGCACTCTGCCTTTCAATTCACCTGTGAACTTATTGTAGGCTGGATGTAACAGTCTGTGCCTATGTTTTTACTACACTCCTTAAAAAGTTTATAGAATGTCTTATGGGTAGACCTTATGGGTCAAAAATTTGAATAACAACTTTCAACAATGGATCTCTTGGTTCTC
>OTU_1834	AAGTCGTAACAAGGTCTCCGTTGGTGAACCAGCGGAGGGATCATTACAGAGTTGCAAAACTCCCTAAACCATTGTGAACGTTACCTATACCGTTGCTTCGGCGGGCGGCCTCGGGGTTTACCCCCCGGGCGTCCCTGGGCCCCACCGCGGGCGCCCGCCGGAGGTCACCAAACTCTTGATAACTTATGGCCTCTCTGAGTCTTCTGTACTGAATAAGTCAAAACTTTCAACAACGGATCTCTTGGTTCTG
>OTU_1835	AAGTCGTAACAAGGTCTCCGTTGGTGAACCAGCGGAGGGATCATTACCGAAGTTACCTTCAAAACCCACTGTGAACCTTACCTCTTGCCGCGTTGTCTCGGCGGGAGGCGGTGGGCGTCGCGTGCCCCTAGCGGGCCGTGCCGCTCCCGTCCCCGCCGGCAGCGCCAAACTCTAAATTTACAGCGGACTGTATGTTCTGATTTACaaaaaaaaCAAGTTAAAACTTTCAACAACGGATCTCTTGGCTCCA
>OTU_1836	AAGTCGTAACAAGGTTTCCGTAGGTGAACCTGCGGAAGGATCATTACTGAGTGAGGGCCCTCTGGGTCCAACCTCCCACCCGTGTTTATTGTACCTTGTTGCTTCGGCGGGCCCGCCTTTACGGCCGCCGGGGGGCTCACGCTCCCGGGCCCGCGCCCGCCGAAGACACCCTCGAACTCTGTCTGAAGATTGTAGTCTGAGTGGAATTATAAATTATTTAAAACTTTCAACAACGGATCTCTTGGTTCCG
>OTU_1837	AAGTCGTAACAAGGTCTCCGTTGGTGAACCAGCGGAGGGATCATTACAGAGTTGCAAAACTCCCTAAACCATTGTGAACGTTACCTTCAAACCGTTGCTTCGGCGGGCGGCCCCGGGGTCATCCCCGGGCGCCCCTGGGCCCCATCGCGGGCGCCCGCCGGAGGCCACCAAACTCTTGATAATTTATGGCCTCTCTGAGTCTTCTGTACTGAATAAGTCAAAACTTTCAACAACGGATCTCTTGGTTCTG
>OTU_1838	AAGTCGTAACAAGGTTTCCGTAGGTGAACCTGCGGAAGGATCATTACAGTAGTCGCCCGGGTTGCCGCAAGGCCTCCCGGGTAACCTACCACCCTTTGTTTATTACACTTTGTTGCTTTGGCAAGCCTGCCCTCGGGCTGCTGGCTCCGGCCGGCGAGCGCTTGCCAGAGGACCTAAACTCTGTTGATCAGTGACTGTCTGAGATTATATTTAATCATTAAAACTTTCAACAACGGATCTCTTGGTTCCA
>OTU_184	AAGTCGTAACAAGGTTTCCGTAGGTGAACCTGCGGAAGGATCATTAACAACGTATCCTAAACGTAAAAAACCCCCCCTGTGAACTTTCATAACCCGAGCTTGCTAGGCCCGCGAAATTCAGCAATCCCTGGTAAATCATTGTTGACCAGCTCTTTGAGTCAGGGATATCCGAACTAGTCGTGTGGATTAAGTTCCGTGAAGCAAGAGCGGTGAGGCAAGTGACCCGGTACCCCCAAGCAATCAATGTTCTGTCAGTGTCGTTGATTGTGTAAGGGTGGCGCAGTAAACGATCGCTGGAGGCCACCACGGCCGGCTCCTTAATAACCCCACCTAAGGATTAGCTCGGCGAAAGCTTGAGCACCAAAAACTAATACGACTGTTAACAATGGATATCTTGGT…
>OTU_1840	AAGTCGTAACAAGGTCTCCGTTGGTGAACCAGCGGAGGGATCATTACAAGAAGCCGAAAGGCTACTTCAAACCATCGCGAACTCGTCCAAGTTGCTTcggcggtgcggcttccccccggggtgccgcggcgccgcgccccccggggcgcggggcgcccgcCGGAGGTCTCAAACTCTTATGGATTATAGTGGTATCTCTGAGTAAAACACAAATAAGTTAAAACTTTCAACAACGGATCTCTTGGTTCTG
>OTU_1841	AAGTCGTAACAAGGTCTCCGTTGGTGAACCAGCGGAGGGATCATTACAGAGTCGCAACACTCCGTAAACCATTGTGAACGTTACCTTAACCGTTGCTTcggcgggcggcgcccgggcctcaccgcccgcggcgccccccggccccccgtgggcgcccgccGGAGGTAAACCAAACTATTGCATTAATGGCCTCTCTGAGTCTTCTGTACTGAATAAGTCAAAACTTTCAACAACGGATCTCTTGGTTCTG
>OTU_1842	AAGTCGTAACAAGGTCTCCGTTGGTGAACCAGCGGAGGGATCATTACCGAGTTTACAACTCCCAAACCCCATGTGAACCTTACCATTCTGTTGCTTCGGCGGGATCGTCCCGGGTGCGGCCGCGAGGTCAGCCCCGGATCCAGGCGCCCGCCGGAGGACCACAAACTCTTCTGTTTTTTAACGGTTTTATCTGAGTGGCTATAAGCAAAAAAATGAATCAAAACTTTCAACAACGGATCTCTTGGTTCTG
>OTU_1843	AAGTCGTAACAAGGTTTCCGTAGGTGAACCTGCGGAAGGATCATTACCTTTCCATGCAGAAGGATAGGGAGGGTGAGTTGTTGCAATTCCCCTCTCCATTCTTCCTGTATACTACCCTTGTCTCTCGAATACTATTTGTTTCCTCGGCAGGTTTGCCTGCCGGTTGGATATAACTATAACCTTTTAATTTTCAATCAGCGTCTGAACAAATTAATAATTACAACTTTCAACAACGGATCTCTTGGTTCTG
>OTU_1844	AAGTCGTAACAAGGTCTCCGTAGGTGAACCTGCGGAGGGATCATTCACATGATTTACTTTATAAACAAACCGTGAACTTTATTTAACTATTCTTGTTGGGAttttttttCCAACAATGTCATTCGATGAACATTAGATAGCTGGCTTGTATTTTATTATACTTTCTCAGCTGATTTTTGAATAGACTAAACATCTATTTACAATCAACCAAACATAGAAACAACTCTATGCCCTGGATATCTTGGTTCTC
>OTU_1846	AAGTCGTAACAAGGTTTCCGTAGGTGAACCTGCGGAAGGATCATTACCGAGTGCGGGTCCTTTGGGCCCAACCTCCCACCCGTGTTTATTGTACCTTGTTGCTTCGGCGAGCCCGCCTCACGGCCGCCGGGGGGCACTCGCCCCCGGGCCCGCGCCCGCCGAAGACACCATTGAACTCTGTCTGAAGATTGCAGTCTGAGTAGATTAGCTAAATCAGTTAAAACTTTCAACAACGGATCTCTTGGTTCCG
>OTU_1847	AAGTCGTAACAAGGTCTCCGTTGGTGAACCAGCGGAGGGATCATTACAGAGTTTTATAACTCCCTAAACCATTGTGAACCTTACCTTTACCGTTGCTTcggcgggcgggccggccccagggccgcgccccccaggcccccccgcggggcgcccgccggAGGAAACCAAACTATTGATACTTTATGGCCTCTCTGAGTCTTCTGTACTGAATAAGTCAAAACTTTCAACAACGGATCTCTTGGTTCTGGCA
>OTU_1848	AAGTCGTAACAAGGTTTCCGTAGGTGAACCTGCGGAAGGATCATTACCGAGTGAGGGCCCTCTGGGTCCAACCTCCCACCCGTGTTTATCATACCTAGTTGCTTcggcgggcccgccgtcatggccgccggggggcacccgcccccgggcccgcgcccgcCGAAGACCCCCCTGAACGCTGTCTGAAGACTGCCGTCTGAGTGGATTGATAAATCAGTCAAAACTTTCAACAACGGATCTCTTGGTTCCG
>OTU_1849	AAGTCGTAACAAGGTCTCCGTTGGTGAACCAGCGGAGGGATCATTACAGAGTTGCAAAACTCCCAAACCATTGTGAACGTTACCTACAAACCGTTGCTTCGGCGGGCGGCTCCGGGTCCGCCCGGTGCCCCTCGGcccccccccAGCGGGGCGCCCGCCGGAGGAAACCCAACTCTTGATACATTATGGCCTCTCTGAGTCTTCTGTACTGAATAAGTCAAAACTTTCAACAACGGATCTCTTGGTTCTG
>OTU_185	AAGTCGTAACAAGGTTTCCGTAGGTGAACCTGCGGAAGGATCATTAACAACGTATCCTAAACGTAAAAAACCCCCCCTGTGAACTTTCATAACCCGAGCTTGCTAGGCCCGCGAAATTCAGCAATCCCTGGTAAATCATTGTTGACCAGCTCTTTGAGTCAGGGATATCCGAACTAGTCGTGTGGATTAAGTTCCGTGAAGCAAGAGCGGTGAGGCAAGTGACCCGGTACCCCCAAGCAATCAATGTTCTGTCAGTGTCGTTGATTGTGTAAGGGTGGCGCAGTAAACGATCGCTGGAGGGGCCGGCGGGGTCAGCGAGCTCTGCTCCTTAATAACCCCAGCTCGGCGAAAGCTTGAGCACCAAAAACTAATACGACTGTTAACAATGGATATCTTGGT…
>OTU_1850	AAGTCGTAACAAGGTTTCCGTAGGTGAACCTGCGGAAGGATCATTACCGAGTGAGGGCCCTCTGGGTCCAACCTCCCACCCGTGTTTATCATACCTAGTTGCTTcggcgggcccgccgtcatggccgccggggggcacccgcccccgggcccgcgcccgccgaagaccccccgaacgctgcccgGAAGGATGCTGTCTGAGCGGTTACAAACAAACCACAAAACTTTCAACAACGGATCTCTTGGTTCCG
>OTU_1851	AAGTCGTAACAAGGTTTCCGTAGGTGAACCTGCGGAAGGATCATTAACAAATGTAATCCAATTACCAACCACACTGTGCACTGTTAACGTATGCTTTGGTAGGGAATGAAATGGCGGGTGCTCTCGGGCGCCAGTCTTTCGATCTGCCAGAGTTTTTTAAATACTAAACAAACAAACGTCTTATTATCTGACTGAACTTCATTTAAACAAATGAAAATACAACTTTTAACAATGGATCTCTTGGCTCTT
>OTU_1852	AAGTCGTAACAAGGTTTCCGTAGGTGAACCTGCGGAAGGATCATTACAAGTGAGGCTACCGAACGCTGGAAACAGCGGTTAGGAGCTTACACCCACCCGTGTTTACATACTATTGTTGCTTTGGCGGGCCGTGGCCTCCACTGCGGGCTCTGCTCGTGTGTGCCCGCCAGAGGACCAAACTCTGAATGTTGGTGATGTCTGAGTACTATCTAATAGTTAAAACTTTCAACAACGGATCTCTTGGTTCTG
>OTU_1853	AAGTCGTAACAAGGTCTCCGTTGGTGAACCAGCGGAGGGATCATTATTAGAAGCCGAAAGGCTACTTAAAACCATCGCGAACTCGTCCAAGTTGCTTCGGCGGCGCGGCCTCCCTCACGGGGGCGCCGCAGCCCCGCCTCTCCGGAGGTGTGGGGCGCCCGCCGGAGGTACGAAACTCTGTATTATAGTGGCATCTCTGAGTAAAAAACAAATAAGTTAAAACTTTCAACAACGGATCTCTTGGTTCTG
>OTU_1854	AAGTCGTAACAAGGTCTCCGTTGGTGAACCAGCGGAGGGATCATTACCGAGTTTACAACTCCCAAACCCCTGTGAACTTATACCTTTACTGTTGCTTCGGCGGGTCCGCCCCGGAACAGGTTCGCGAGAGCCGGCCCGGAACCAGGCGCCCGCCGGGGGACCAAAACTCTTGTATTTTTTACTTTTGCATGTCTGAGTGGAATCATAACAAATGAATCAAAACTTTCAACAACGGATCTCTTGGTTCTG
>OTU_1855	AAGTCGTAACAAGGTTTCCGTAGGTGAACCTGCGGAAGGATCATTACCGAGTGAGGGCCCTCTGGGTCCAACCTCCCACCCGTGTTTATTTTACCTTGTTGCTTCGGCGAGCCTGCCTTTTGGCTGCCGGGGGACGTCTGTCCCCGGGTCCGCGCTCGCCGAAGACACCTTAGAACTCTGTCTGAAGATTGTAGTCTGAGATTAAATATAAATTATTTAAAACTTTCAACAACGGATCTCTTGGTTCCG
>OTU_1856	AAGTCGTAACAAGGTCTCCGTTGGTGAACCAGCGGAGGGATCATTACAGAGTTGCAAAACTCCCTAAACCATTGTGAACGTTACCTTCAAACCGTTGCTTCGGCGGGCGGCCCGGGTCCGCCCGGTGCCCCCTGGCCCCCTAGCGGGGCGCCCGCCGGAGGAAACCCAACTCTTGATTATTATGGCCTCTCTGAGTCTTCTGTACTGAATAAGTCAAAACTTTCAACAACGGATCTCTTGGTTCTGGCA
>OTU_1857	AAGTCGTAACAAGGTCTCCGTTGGTGAACCAGCGGAGGGATCATTACAGAGTTTACAACTCCCAAACCCACTGTGAACCTTACAGCGTCGTTGCCTCGGCGGACCGCCCCCGGCGCGGCCCCTCTCAGGGGGCGCCCGGGACCACGGCGCCCGCCGGAGGACCCAAACTCTCGTATTTGCAGGATGCATTGCTCTGAGTGAAGACAAGCGAATGAATCAAAACTTTCAACAACGGATCTCTTGGTTCTG
>OTU_1858	AAGTCGTAACAAGGTCTCCGTTGGTGAACCAGCGGAGGGATCATTGCCGGGTCGCAAGACTCCCAAACCATCGCGAACATACCGTGTCGTTGCCTCGGCGGGCGGCTCCAGGGCGGAGCCTCCAGCCCCCCGCGAGGGGGGTGCCCGCCGGCGGCCCAGCAAACGCTTGTCGTCTCTAGGCACCTCTGAGGACGCCCGCGAGGGCACCGAAAACAATCAAAACTTTCAACAATGGATCTCTTGGCTCTG
>OTU_1859	AAAGTCGTAACAAGGTTTCCGTAGGTGAACCTGCGGAAGGATCATTACAGTAGTCGCCCGGGTTGCCGCAAGGCCTCCCGGGTAACCTACCACCCTTTGTTTATTACACTTTGTTGCTTTGGCAGGCCTGCCCTCGGGCTGCTGGCTCCGGCCGGCGAGCGCCTGCCAGAGGACCTAAACTCTGTTTGTCTATACTGTCTGAGTACTATATAATAGTTAAAACTTTCAACAACGGATCTCTTGGTTCTG
>OTU_186	AAGTCGTAACAAGGTTTCCGTAGGTGAACCTGCGGAAGGATCATTACAACGTATCCACGTACAAACCAGTGAACTGTTCCCAACGGAGTGTCGCGGTGCAGGCGAGTTTTCGCCTGCATTCCTGGGCTAATGGCTTCCAAAACCCTGCTGATGGAGTTTCTTGACCTTTGTCTCGAAACTAGGGTCTGGTCGTCGCCAAAGCGTTCGCGCTTTGGGGCCTGCGCGCCTCTGTTCGGTTGTTTACCATCGGCTGGTGAAACCCTTATTAACCCTATGCAACCTTTGATCTGAACTATTCTGTCTGATGCGCTCAAGTCCTTGCTGGCTTCGGTCACGGACTTTGCATCGGCGGAAAATCGTATGAAACTAAGAACAACTCTTAACAACGGATATCTTGGT…
>OTU_1860	AAGTCGTAACAAGGTTTCCGTAGGTGAACCTGCGGAAGGATCATTACTGAGTGAGGGCCCTCTGGGTCCAACCTCCCACCCGTGTTTATTGTACCTTGTTGCTTCGGCAGGCCCGCCTCACGGCCGCCGGGGGGCTTCTGCCCCCGGGCCCGCGCCTGCCGGAGACAATCTTGAACGCTGTCTGAAGAATGCAGTCTGAGCGATTAGCAAAATTAGTTAAAACTTTCAACAACGGATCTCTTGGTTCCG
>OTU_1861	AAGTCGTAACAAGGTTTCCGTAGGTGAACCTGCGGAAGGATCATTACCGAGTGCGGGCCCTCTGGGTCCAACCTCCCACCCGTGTTTATCGTACCTTGTTGCTTcggcgggcccgccatcaggccgccggggggcacccgcccccgggcccgcgcccgccGAAGACACCTGTGAACGCTGTCTGAAGATTGCAGTCTGAGCGATTAGCTAAATCAGTTAAAACTTTCAACAACGGATCTCTTGGTTCCG
>OTU_1862	AAGTCGTAACAAGGTCTCCGTTGGTGAACCAGCGGAGGGATCATTAAAGAGTTGCAAAGCTCCTTAAAACCATCGTGAACTCATCCGTCAGCGTTGCTTCGGCGGGCGGCCCCAGGGAGGGGCCGTAGCCTCCCCTCTCCGGAGGGGCGGCGCCCGCCGGAGGTACAAGAACTCTCTGTATTTTCAGTGGTATCTCTGAGTAAACAAGCAAATAAGTCAAAACTTTCAACAACGGATCTCTTGGTTCTG
>OTU_1863	AAGTCGTAACAAGGTTTCCGTAGGTGAACCTGCGGAAGGATCATTAAAAAAGTACGCCTGGTGATAAGCCAGGTAGTATAAAACCACCTGTTTACCTTTACCTGTTGCTTCCGTGGAATACGGGTGCTCTTCCTGTTCGCAGGCTTGAGTTACCTTCCACGGGTGTATTCAAAAACTCGTTTTGTAATTTTGTCTGATATAAAATTTTAATAAAAGTTAAAACTTTCAACAACGGATCTCTAGGTTCTC
>OTU_1864	AAGTCGTAACAAGGTCTCCGTTGGTGAACCAGCGGAGGGATCATTACAGGGTCTGACGACTGCCCAAACCAAACCGTGAACTATTCCGCGAACCATATGCTTCGGCGGGCCGCTCGCTGGGGGAGCCGCGGCCGGCTTTTGTCGGTGGGCCGCCGAAAGCATGCAAACCTAAACTCTGAGAACTGCTCTGAGAAATATCTTTTCCAATGGAATAAATTACAACTCATAACAATGGATCTCTTGGCTCTG
>OTU_1865	AAGTCGTAACAAGGTTTCCGTAGGTGAACCTGCGGAAGGATCATTACTGAGTAATGGAAAACAGTGTTTCTAATCGAGATTCTGTTTTCCTATCTCTATACCCTTTGGAATGTTTACAAGTTGCTTTGGCATTAGTATATACTAGTGTCAAAGAAGTTTAACAATGTTGTCCAATAATTGGCTGTCATTTGTCTGATTAATTACTTTAATAGTAAATTAAAACTTTCAACAACGGATCTCTTGGTTCTG
>OTU_1866	AAGTCGTAACAAGGTTTCCGTAGGTGAACCTGCGGAAGGATCATTAATGAATAATCCTTTACGGATTCAATCCGTATCCACCCCATGTGAACTGTTAACTGTCTTATGTCTCGCTCAACCAGTATGGCCTCTTCGGAGCTGTTTCTGGGTGGGCGGACGTAGTATAATAAACCTGATTTTTAACTTGTCTGAAGTAATTTAATTAAACTTAATTAATTACAACTTTCAACAACGGATCTCTTGGCTCCT
>OTU_1867	AAGTCGTAACAAGGTTTCCGTAGGTGAACCTGCGGAAGGATCATTATTAATTCTTCTAGTAAAGCGGCTGCGCGTTAAAACCGCAGCTGTTTTTCTTGTGAACTGGGGCCTGCTGTTAAAGTTTACGCTTTTCTGGCAGGCCTGTCGTTAATGCTCTTGTGTTAAttttttgtttttgctttttttGAGCTTAACCGCTTGAGAAAAATAATTACAAGACAACTTTCAGCAATGGATCTCTTGGCTCTT
>OTU_1868	AAGTCGTAACAAGGTTTCCGTAGGTGAACCTGCGGAAGGATCATTATTGAATGCAACATGGGGATGTTTTGCTGGCTGCCTCTGGTAGCAATGTGCACTCCTCTTCATTCAAATCCACCTGTGCACGTTGAGTAGGCATGGATTCAGTTCTGTGCCTATGTCTCCATTTTACACACCTTTGTTGTATTGGATTTTAAAAAGAAATAAAAATGTCTTGTACAACTTTCAACAATGGATCTCTTGGTTCTC
>OTU_1869	AAGTCGTAACAAGGTTTCCGTAGGTGAACCTGCGGAAGGATCATTAATGAGTTATGGGAAGCGGCTTCTATAACCTAGAAGCTGTCTTCCTATCTCTTCACCCTTTGGTATATGTATAAGTTGCTTTGGCAATGGCTTCTGCTGTTGTCAAAGAATACAAACTATGTTGTCCTATAATTGGCTGTCATTTGTCTGATTAGTTACTTTAATAGTAAATTAAAACTTTCAACAACGGATCTCTTGGTTCTG
>OTU_187	AAGTCGTAACAAGGTTTCCGTAGGTGAACCTGCGGAAGGATCATTAACAACGTATCCTAAACGTAAAAAACCCCCCCTGTGAACCTTCATAACCCGAGCTTGCTAGGCCCGCGAAATTCAGCAATCCCTGGTAAATCATTGTTGACCAGCTCTTTGAGTCAGGGATCTCCGAACTAGTCGTGTGGATTAAGTTCCGTGAAGCAAGAGCGGTCCAAGCAATCAATGTTCTGTCAGTGTCGTTGATTGTGTAAGGGTGGCGCAGTAAACGATCGCTGGAGGCCACCACGGCCGGCGACTGGGTCAGCGAGCTCTGCTCCTTAATAACCCCACCTAAGGATTAGCTCGGCGAAAGCTTGAGCACCAAAAACTAATACGACTGTTAACAATGGATATCTTGGT…
>OTU_1870	AAGTCGTAACAAGGTTTCCGTAGGTGAACCTGCGGAAGGATCATTCATAATAAAGTGTTTTATGGCACTTTTTTAAAAAATCCATATCCACCTTGTGTGCAATGTTTTTTAGATCTAGCCAAAATGATATTTTGGTTAGGTTTTATTATATTACATCAACTCTTATTTAACTTGATTTGTCTGAAAAATATTATGAATTTTTTAACTTAATTCAAAATACAACTTTCAACAACGGATCTCTTGGCTCTC
>OTU_1871	AAGTCGTAACAAGGTTTCCGTAGGTGAACCTGCGGAAGGATCATTCAAAATAAAAGTGAATTTTATGGCACTTTTAAAAAAATCCATATCCACCTTGTGTGCAATGTAATTTTTTGAAAGAGGGGGTTTTATTCCCTCTTTCTAAAATCATATCAACTCTTTGCTTTGAACCTGTTTGTCTGATATAAATATATTCTTGAATAACTTAATTCAAAAATACAACTTTCAACAACGGATCTCTTGGCTCTC
>OTU_1873	AAGTCGTAACAAGGTCTCCGTTGGTGAACCAGCGGAGGGATCATTCATAATCAAGTGTTTTTATGGCACTTTCAAAAATCCATATCCACCTTGTGTGCAATGTCATCTCTCTGGGGGCTGCCGGCTGTCAAAAGCCGTGTGGTCACCTTTGGGATTTATATCTACTCAGAACTTTAGTGATTTTGTCTGAAACATATTATGAATACTTAATTCAAAATACAACTTTCAACAACGGATCTCTTGGCTCTC
>OTU_1874	AAGTCGTAACAAGGTTTCCGTAGGTGAACCTGCGGAAGGATCATTCATAATCAAGTGTTTTTATGGCACTTTCAAAAATCCATATCCACCTTGTGTGCAATGTCATCTCACTGGAGATCAACGGCTGTAAAAATCCGTTGGTCACCTTTGGGATTTATATCTACTCAGAACTTTAGTGATTTTGTCTGAAAAATATTATGAATAACTTAATTCAAAATACAACTTTCAACAACGGATCTCTTGGCTCTC
>OTU_1875	AAGTCGTAACAAGGTCTCCGTTGGTGAACCAGCGGAGGGATCATTACAAGAAGCCGAGAGGCTACTTAAAACCATTGTGAACCCATCCACGTTGCTTCGGCGGCGCGGGAACCCTACCGGGGGACCGCAGCCCTGCCCTCCCCAGGGTACCGGGCGCCCGCCGGAGGTTATAACTCCTGCTTACTTCATTTTCATCTCTGAGTGAAACTAAATAAGTCAAAACTTTCAACAACGGATCTCTTGGTTCTG
>OTU_1876	AAGTCGTAACAAGGTCTCCGTTGGTGAACCAGCGGAGGGATCATTAAAGAGTTGCAAAACTCCCTTCATACCATCGCGAACGTTACCCAATTCTCGTTGCTTCGGCGGGAAGGCACACCCCCTCTTAGGCTCCCCTTAACCGGGAGCTCCCGCCGGAGGAACGCAGCTATACTCTTGTATTTGTTGGCCTCTCTGAGTACGATTTATGCAAATAAGTCAAAACTTTCAACAACGGATCTCTTGGTTCTG
>OTU_1877	AAGTCGTAACAAGGTCTCCGTTGGTGAACCAGCGGAGGGATCATTAAAGAGTTGCAAAACTCCCAAACCATTGTGAACCTACCTCACCGTTGCTTCGGCGGGTGGCGCCCCCTCACCGGAAGCGCCGCGCCGGCCCCCTCACCGGGGCCCGGCAACCCGTCAGAGGCCCGCAACTCTTAGTCATCATTGGCCTCTCTGAGTAACTTATACAATAAGTCAAAACTTTCAACAACGGATCTCTTGGTTCTG
>OTU_1878	AAGTCGTAACAAGGTCTCCGTTGGTGAACCAGCGGAGGGATCATTACTGAGTTGCAAAACTCCAAAACCCTATGTTTATCTATCTCGAAAACGTCTGCTTCGGCGGGCGGCCCCAGGGCGGGGCCGCAGCCTAGCGCTTCGGCGCCGGGCGCCTGCCGGAGAGGACAACCCAAAACTCTTGTTTTCAATGAAACTCTGAGCATAAAAGACAAATAGTCAAAACTTTCAACAACGGATCTCTTGGTTCTG
>OTU_1879	AAGTCGTAACAAGGTTTCCGTAGGTGAACCTGCGGAAGGATCATTAACAAATGTAATCCAATTACCAACCACACTGTGCACCGTTAACGTATGCTTTGGCAGGGAGTGAAATGGCGGGAGCCCTTGGGCGCCGGTCTTTCGATCTGCCAGAGTTTTTTACATACTAAACAAACAAACGTCTTATTATCTGACTGAACTTCATTTAAACAAATGAAAATACAACTTTTAACAATGGATCTCTTGGCTCTT
>OTU_188	AAGTCGTAACAAGGTTTCCGTAGGTGAACCTGCGGAAGGATCATTAACAACGTATCCTAAACGTAAAAAACCCCCCCTGTGAACTTTCATAACCCGAGCTTGCTAGGCCCGCGAAATTCAGCAATCCCTGGTAAATCATTGTTGACCAGCTCTTTGAGTCAGGGATATCCGAACTAGTCGTGTCGTGAAGCAAGAGCGGTGAGGCAAGTGACCCGGTACCCCCAAGCAATCAATGTTCTGTCAGTGTCGTTGATTGTGTAAGGGTGGCGCAGTAAACGATCGCTGGAGGCCACCACGGCCGGCGACTGGGTCAGCGAGTAATAACCCCACCTAAGGATTAGCTCGGCGAAAGCTTGAGCACCAAAAACTAATACGACTGTTAACAATGGATATCTTGGT…
>OTU_1880	AAGTCGTAACAAGGTCTCCGTAGGTGAACCTGCGGAGGGATCATTACCGAGTTCAGGCCCTCGCGGGCAGATCTCCCCACCCTTGTGTATCCATACTTCTGTTGCTTTGGCAGGCCGCTGGGCTTTCGACCTGGCCACCGGCTCTGGAGCTGGTGTGCGCCTGCCGGAGGACCCCCAAACTCTGGTTATCTGTGTCGTCTGAGTACTATACAATCGTTAAAACTTTCAACAACGGATCTCTTGGTTCTG
>OTU_1881	AAGTCGTAACAAGGTCTCCGTTGGTGAACCAGCGGAGGGATCATTACTGAGTTTACTACTCTCAAGCCCAATGTGAACCTTACCTGACCTTTGCTACTGTTGCCTCGGCgggggggagccggggggCCCCTTCCCCCCTCGACCTCCCGCCGGCAGCATCAAACTCTTATTTTCATAGCGGAGAAATGTCTTCTGATTGTCAAAAAACGAAACAAGTCAAAACTTTCAACAACGGATCTCTTGGTTCTG
>OTU_1884	AAGTCGTAACAAGGTCTCCGTTGGTGAACCAGCGGAGGGATCATTACAGAGTTGCAAAACTCCCTAAACCATTGTGAACGTTACCTAAACCGTTGCTTCGGCGGGCGGCGCCGGGGTTTACCCCCCGGGCGCCCCTGGGCCCCACCGCGGGCGCCCGCCGGAGGAAACCCAACTCTTGATTATTATGGCCTCTCTGAGTCTTCTGTACTGAATAAGTCAAAACTTTCAACAACGGATCTCTTGGTTCTG
>OTU_1886	AAGTCGTAACAAGGTCTCCGTTGGTGAACCAGCGGAGGGATCATTACCGAGTTTACAACTCCCAAACCCATGTGAACATACCTACTGTTGCTTCGGCGGACACGCCCCGGGCGCACCTCCTCACGGGGGCGTGCCCCGGAACCAGGCGCCCGCCGGGGGACCGAAACCTCTGTATTTACCATTTGAGTACTCTGAGTGTGATTTACAAAATCAAAATTAAAACTTTCAACAACGGATCTCTTGGCTCTA
>OTU_1887	AAGTCGTAACAAGGTTTCTGTAGGTGAACCTGCAGAAGGATCATTCAGGAATACTTTAAAACACGATGGTCACTCACTCTCTTTGCGAGAGGGTTTGGCTTATCAACCTTGTGAACATGTGTGACCTAGTAAAAGGTTGGTCTTATGGCCCACTGGAAGCAGGCGCATAGGGGCAAAGTTAACACTTATTTTAATGTCTAAAACATCTAACAGTATATATAACCTTTAACAATGGATCTCTTGGCTCCT
>OTU_1889	AAGTCGTAACAAGGTCTCCGTTGGTGAACCAGCGGAGGGATCATTACAGAGTTGCAAAACTCCCTAAACCATCGCGAACGTTACCCCAAACCGTTGCTTcggcgggcggccgcgggctcacccccgcggcccccgggccccctccagggcgcccgccggAGGTACCCCAAACCATTGATACTTTATGGCCTCTCTGAGTCTTCTGTACTGAATAAGTCAAAACTTTCAACAACGGATCTCTTGGTTCTG
>OTU_189	AAGTCGTAACAAGGTTTCCGTAGGTGAACCTGCGGAAGGATCATTAACAACGTATCCAAACGTAAAAAACCCCCCCTGTGAACTTTCATAACCCGAGCTTGCTAGGCCCGCGAAATTCAGCAATCCCTGGTAAATCATTGTTGATATCCGAACTAGTCGTGTGGATTAAGTTCCGTGAAGCAAGAGCGGTGAGGCAAGTGACCCGGTACCCCCAAGCAATCAATGTTCTGTCAGTGTCGTTGATTGTGTAAGGGTGGCGCAGTAAACGATCGCTGGAGGCCACCACGGCCGGCGACTGGGTCAGCGAGCTCTGCTCCTTAATAACCCCACCTAAGGATTAGCTCGGCGAAAGCTTGAGCACCAAAAACTAATACGACTGTTAACAATGGATATCTTGGT…
>OTU_1890	AAGTCGTAACAAGGTTTCCGTAGGTGAACCTGCGGAAGGATCATTACCGAGTGAGGGCCCTCTGGGTCCAACCTCCCACCCGTGTTTATCGTACCTTGTTGCTTCGGCGGGCCCGCCGCAAGGCCGCCGGGGGGCACCTGCCCCCGGGCCCGCGCCCGCCGAAGACACCTGTGAACGCTGTCTGAAGATTGCAGTCTGAGCGAATAGCTAAATTTATTAAAACTTTCAACAACGGATCTCTTGGTTCCG
>OTU_1891	AAGTCGTAACAAGGTTTCCGTAGGTGAACCTGCGGAAGGATCATTCACAATAAGCGTTTCATGGCGCTTTTTAAACAAATCCATATCCACCTTGTGTGCAACGTTTGAGTTCTCCTCCCCTTTCCTTAACTGCGAGAGGGAGGATTTCTTAACTACATCAACCTTTTTAAACCAGTTTGTCTGAACAAGTGTATCGTGAATTAACTTAATTCGAAAATACAACTTTCAACAACGGATCTCTTGGCTCTC
>OTU_1892	AAGTCGTAACAAGGTTTCCGTAGGTGAACCTGCGGAAGGATCATTACCCTTTCAATGCACAAGGATCGAGCGGGTGTAGGCAACTATACCCTCTCTCCTTGCTGTATTACGCCCTTGTTTTTCAAATTCTATTTGTTTCCTCGGCGGGGTTTCCCGCCGGTTGGATAAAACTATAACCTTTTTAATTTTCAATCAGCGTCTGAAATAAATTAATAATTACAACTTTCAACAATGGATCTCTTGGCTCTG
>OTU_1893	AAAGTCGTAACAAGGTTTCCGTAGGTGAACCTGCGGAAGGATCATTATTGATTCAGAGAACGTGCTGGCTTCTTTCTGGAAGCATATTTGTGCACTCTCAATCTCTTCTTGTCCCACCTGTGCATGTTTTGATGGGCGAGGGTTTTATTGACCCTTTTGCTCATCGCTTTTACATACACCTATTTATAAACATCATTTTGATTGTAAATGAATTTATAACAACTTTCAACAATGGATCTCTTGGTTCTC
>OTU_1895	AAGTCGTAACAAGGTCTCCGTTGGTGAACCAGCGGAGGGATCATTAAAGAGTTGCAAAACTCCCTAAACCATTGTGAACGTTACCTAAACCGTTGCTtcggcgggcggccccggggtttaccccccgggcgcccctgggccccaccgcgggcgcccgccgGAGGTATCTAACTCTTGACAATTGTATGGCCTCTCTGAGTCTTTGTACTTAATAAGTCAAAACTTTCAACAACGGATCTCTTGGTTCTG
>OTU_1896	AAGTCGTAACAAGGTCTCCGTTGGTGAACCAGCGGAGGGATCATTACAGAGTTGCAAAACTCCCTAAACCATTGTGAACGTTACCTAAACCGTTGCTTCGGCGGGCGGCCCCGGGGTTCTCCCCGGGCGCCCCTGGGCCCCACCGCGGGCGCCCGCCGGAGGTTACCCAAACTCTTGATACATTATGGCCACTCTGAGTCTTCTGTACTGAATAAGTCAAAACTTTCAACAACGGATCTCTTGGTTCTG
>OTU_1898	AAGTCGTAACAAGGTTTCCGTAGGTGAACCTGCGGAAGGATCATTACCGAGTGAGGGCCCTCCGGGTCCAACCTCCCACCCGTGTTTATCGTACCTTGTTGCTTCGGCGGGCCCGCCGCAAGGCCGCTGGGGGGCTTCTGTCCCCGGGCGCGTGCCCGCCGAAGACACCTGTGAACGCTGTCTGAAGATTGCAGTCTGAGCGAAAAGCTAAATTTGTTAAAACTTTCAACAACGGATCTCTTGGTTCCG
>OTU_19	AAGTCGTAACAAGGTTGACCCTTTGTATTCACCATCGGAAGCCTTGTATTTCAGTCTGCACCTGTTGCGGGCAACACCGTTCTGTTGCTAGAAGCCCAGGCATCCTTGGTTACTAGCAGTCGCTCAAATCCGCGATTCACAGATCAAACAATGGTGGTCCCATTTTCACAGATTTCAACATGACCGGCCCCTATTCGTTAAAGAATAGCGGTTTTTGTGTTCCGTAGGTGAACCTGCGGAAGGATCATTACCGAGTCAGGGTTCTTTTTTAGGCCCGAAACTCCCACCCTTTGTTAAATCTACCCATGTTGCTTCGGCGGGCCCGTCCTCACCGGACCGCTGGAGGCGTCAGCCTCTAGCCAGCGCCCGTCAGTAGCCCACTCAAACCCATTTATCAAT…
>OTU_190	GGGAATATTGCGCAATGGAGGGAACTCTGACGCAGTGACGCCGCGTATAGGAAGAAGGTTTTCGGATTGTAAACTATTGTCGTTAGGGAAGAAAAAAGACAGTACCTAAGGAGGAAGCCCCGGCTAACTATGTGCCAGCAGCCGCGGTAATACATAGGGGGCAAGCGTTATCCGGAATTATTGGGTGTAAAGGGTGCGTAGACGGGTGTTTAAGTTGGTTGTGAAATCCCTCGGCTCAACTGAGGAACTGCAACCAAAACTGGATATCTTGAGTGTCGGAGAGGAAAGTGGAATTCCTAGTGTAGCGGTGAAATGCGTAGATATTAGGAGGAACACCAGTGGCGAAGGCGACTTTCTGGACGATAACTGACGTTGAGGCACGAAAGTGTGGGGAGCAAA…
>OTU_1900	AAGTCGTAACAAGGTCTCCGTTGGTGAACCAGCGGAGGGATCATTACAGAGTTGCAAAACTCCCAAACCATTGTGAACGTTACCTTTAACCGTTGCTTCGGCGGGCGGCTCCGGGATCACTCCCGGGGCCCCTGGGCCCCCCTTGCGGGGCGCCCGCCGGAGGAAAACCCAACTCTTGATTATTATGGCCTCTCTGAGTCTTCTGTACTGAATAAGTCAAAACTTTCAACAACGGATCTCTTGGTTCTG
>OTU_1902	AAGTCGTAACAAGGTTTCCGTAGGTGAACCTGCGGAAGGATCATTAACGAATTACAAAAGTCGGCCTTGCTGTTGCTGGTGGAAACACATGTGCACGCTCGGTCGCAAATCCACACACCTGTGCATCTATGACTCGAGGTTGTCGTCGTATGACCGAGAGTAACTTTTACACACTCTTGAATGTGATGGAATGTCTTTTGTGCATAATGTACATTTAAACAACTTTCAACAACGGATCTCTTGGCTCTC
>OTU_1903	AAGTCGTAACAAGGTTTCCGTAGGTGAACCTGCGGAAGGATCATTACCGAAGTACAGGCCCTCTCGTAGGGCTAAACTTCCACCCTTTGTTTACTATTCTTTGTTGCTTTGGCGAGACGTCCTCGGACCACCGGCCCTCGGGCTGGTGCGCGCTCGCCAGAGGAAAATCAAACCCAAACCATATTTAGTGATTTGTCTGAAAACAAGTTTAATTATTTAAAACTTTCAACAACGGATCTCTTGGCTCTG
>OTU_1904	AAGTCGTAACAAGGTTTCCGTAGGTGAACCTGCGGAAGGATCATTAACACTAATGAAATCCAAAACCTTTTGGATCAACCCAACCTTAGCGAACCGTTCGTATATTTTCCCTTTGCCCAATTTTACCAAACGCAAAAACTCTGATGTAAAGTGTCTGATTCTTATTCTCGTTTTCGGTTGTCATGACCGAGCCCGCGGGAATCAAAATCTAACGCAATACAACTCTTAACAACGGATATCTTGGCTCTC
>OTU_1905	AAGTCGTAACAAGGTTTCCGTAGGTGAACCTGCGGAAGGATCATTACCGAGTGAGGGCCCTCTGGGTCCAACCTCCCACCCGTGTTTATTTTACCTTGTTGCTTCGGCGGGCCCGCCTTAACTGGCCGCCGGGGGCTCTCAGCCCCGGGCCCGCGCCCGCCGGAGACACCACGAACTCTGTCTGAAGATTGTAGTCTGAGTGAAAATATAAATTATTTAAAACTTTCAACAACGGATCTCTTGGTTCCG
>OTU_1906	AAGTCGTAACAAGGTTTCCGTAGGTGAACCTGCGGAAGGATCATTACCGAGCGAGGGCCCTCTGGGTCCAACCTCCCACCCGTGTTTATCGTACCTTGTTGCTTCGGCGGGCCCGCCTCACGGCCGCCGGGGGGCTTACGCCCCCGGGCCCGCGCCCGCCGAAGACACCCTCGAACTCTGTCTGAAGATTGTAGTCTGAGTGAAAATATAAATTATTTAAAACTTTCAACAACGGATCTCTTGGTTCCG
>OTU_1907	AAGTCGTAACAAGGTTTCCGTAGGTGAACCTGCGGAAGGATCATTACCAATCCACCTTTACAAACCACTGTGAACCGTTCCTGTCCTTGGGTGGCAGGAGGATGCACATTTCAGTGTGTCTTATTGCCACCCAAACTTTTGCAAACCACTTACATCAACCTTATCTGTTGAAACTTCTTTGCGGCTATCTTATGGCCCAAAGATTATAATAAACAAATACAACTTTTAACGGTGGATCTCTTGGCTCAT
>OTU_1908	AAGTCGTAACAAGGTTTCCGTAGGTGAACCTGCGGAAGGATCATTATTGATTGTGAATCGTTACCTTCTGTGCTGGCTCCGGCAAGTGCACGTTGGTGACTTTCATTCCCAACACTCTTGTGAACCTTTGGCCTCTTGCTAGCTCCGGCTGGCAGAGGATTTTTACACACACACTCGAATGTAATGAAAAACCTCTTGTTGTGCGCAAGCACGAATGTACAACTTTCAACAACGGATCTCTTGGCTCTC
>OTU_1909	AAGTCGTAACAAGGTTTCCGTAGGTGAACCTGCGGAAGGATCATTACCGAAGTACAGGCCCTCTCGTAGGGCTAAACTTCCACCCTTTGTGAACTACACTTTGTTGCTTTGGCGAGACGCCCTCGTGGCCACCGGCTCCGGCTGGTGCGCGCTCGCCAGAGAAAACCCAAACCCAAACCATATTTAGTGATTTGTCTGAAAACAAGTTTAATTATTTAAAACTTTCAACAACGGATCTCTTGGCTCTG
>OTU_1910	AAGTCGTAACAAGGTCTCCGTTGGTGAACCAGCGGAGGGATCATTACAAGAAGCCGAAAGGCTACTTAAAACCATCGCGAACTTATCCAAGTTGCTTCGGCGGCGCGGCTCCCCTCACGGGGGACTGCAGCCCCGCCTCTCAGGAGGTATGGGGCACCCGCCGGAGGTACGAAACTCTGTATTATAGTGGCATCTCTGAGTATAACACAAATAAGTTAAAACTTTCAACAACGGATCTCTTGGTTCTG
>OTU_1911	AAGTCGTAACAAGGTTTCCGTAGGTGAACCTGCGGAAGGATCATTACTGAGTGAGGGCCCTCTGGGTCCAACCTCCCACCCGTGTTTATTGTACCTTGTTGCTTCGGTGCGCCCGCCTCACGGCCGCCGGGGGGCTTCTGCCCCCGGGTCCGCGCGCACCGGAGACACCATTGAACTCTGTCTGAAGATTGCAGTCTGAGCATAAACTAAATAAGTTAAAACTTTCAACAACGGATCTCTTGGTTCCG
>OTU_1912	AAGTCGTAACAAGGTCTCCGTTGGTGAACCAGCGGAGGGATCATTAAAGAGTTGCAAAACTCCCTAAACCATTGTGAACATACCTTCAACGTTGCTTCGGCGGGTTGGCTCCGGGATCACTCCCGGGGCCCCTGGGCCCCCCAGCGGGGCGCCCGCCGGAGGTCACCTAACTCTTGATAATTTATGGCCTCTCTGAGTCTTCTGTACTGAATAAGTCAAAACTTTCAACAACGGATCTCTTGGTTCTG
>OTU_1913	AAGTCGTAACAAGGTCTCCGTAGGTGAACCTGCGGAGGGATCATTACAGAGTTCATGCCCTCGCGGGTAGATCTCCCACCCTTGCGTATTCATACCTTTGTTGCTTTGGCAGGCCGCCTGGGCTCATGCCCGGCCACCGGCTCTCGGGCTGGTGCGTGCCTGCCAGAGGATCTCCAAACTCCAGTTATCAGTGTTGTCTGAGTCTTAAACAATCGTTAAAACTTTCAACAACGGATCTCTTGGTTCTG
>OTU_1914	AAGTCGTAACAAGGTTTCCGTAGGTGAACCTGCGGAAGGATCATTACCGAAGTACAGGCCCTCTCGTAGGGCTAAACTTCCACCCTTTGTTTACTATTCTTTGTTGCTTTGGCGAGACGTCCTCGGACCACCGGCCCTCGGGCTGGTGCGCGCTCGCCAGAGGAAAATCAAACCCAAACCTTTTTTTAGTGTCGTCTGATAACAAGTTTAAATTATTAAAACTTTCAACAACGGATCTCTTGGCTCTG
>OTU_1915	AAGTCGTAACAAGGTCTCCGTTGGTGAACCAGCGGAGGGATCATTAAAAGAAGCCGAAAGGCTACTTATAACCATTGTGAACTCGTCCAAGTTGCTTCGGCGGCGCGGTGCCTTATGGGCGCCGCAGTCCGGCCCCCTCGGGGGTGCGGGGCAACCGCCGGAGGTACAAAACTCTTCTGTATTATAGTGGAATTCTGATTAAACAAACAAATAAGTTAAAACTTTCAACAACGGATCTCTTGGTTCTG
>OTU_1916	AAGTCGTAACAAGGTCTCCGTTGGTGAACCAGCGGAGGGATCATTACAGAGTTGCAAAACTCCCTAAACCATTGTGAACGTTACCTAAACCGTTGCTTCGGCGGGCGGCCCGGGTCCTTCCCGGCGCCCCCCAGGCCCCCTCGCGGGGCGCCCGCCGGAGGTACCCCAAACCATTGATACTTTATGGCCTCTCTGAGTCTTCTGTACTGAATAAGTCAAAACTTTCAACAACGGATCTCTTGGTTCTG
>OTU_1917	AAGTCGTAACAAGGTTTCCGTAGGTGAACCTGCGGAAGGATCATTCATAATCAAGTGTTTTTATGGCACTTTATAAAAATCCATATCCACCTTGTGTGCAATGTCATCTCACTGGAGGTCGCGGCTGTAAAAATCCGTTGGCCACCTTTGGGATTTATATCTACTCAGAACTTTAGTGATTTTGTCTGAACCATATTATGAATACTTAATTCAAAATACAACTTTCAACAACGGATCTCTTGGCTCTC
>OTU_1918	AAGTCGTAACAAGGTTTCCGTAGGTGAACCTGCGGAAGGATCATTACCGAAGTATAGGCCCTTTTATAGGGCTAAACTTCCACCCTTTGTTTACTATTCTTTGTTGCTTTGGCGAGACGTCTTCGGACCACCGGCTCTCGGGCTGGTGAGCGCTCGCCAGAGGAAAATCAAACCCAAACCTTTTTTTAGTGTTGTCTGAGAAACAAGTTTAATTATTAAAACTTTCAACAACGGATCTCTTGGCTCTG
>OTU_1919	AAGTCGTAACAAGGTCTCCGTTGGTGAACCAGCGGAGGGATCATTACAGAGTTGCAAAACTCCCTAAACCATTGTGAACGTTACCTAAACCGTTGCTTCGGCGGGCGGCCCCGGGGTTCTCCCCGGGCGCCCCTGGGCCCCATCGCGGGCGCCCGCCGGAGGTCACCAAACTCTTGACAATTGTATGGCCTCTCTGAGTCTTTGTACTTAATAAGTCAAAACTTTCAACAACGGATCTCTTGGTTCTG
>OTU_192	AAGTCGTAACAAGGTTTCCGTAGGTGAACCTGCGGAAGGATCATTAACACGTATCCACGTATCAACCCCTCGTGCACAACGAAAAAACCGTACCCTTTGGTCAGTCTAGTCTAGCTGGTTCGTCATGGTCCCAACGATGGCGGTTCCCTCCCTTCTTTCTCTCTTGTTGCCTCTTCGGGGGTGGGCAAGGGAGAGTAGGGGGGAGTGAGCTGGGGATCTTGAGCCTACTAGGCGCTTTGACGGCTGACTGGCATTTTCCCATCGCTTTGAAAATGCCTAATTGTTTTTTAACCCCTTTGTACTTCTTTGTACTGAACCACATTCTTTCGAAGCCCGAAAGGGCGACGAAGAGAACGTTTACGAAACGAAAGAACAACTCTTAGCAACGGATATCTTGGT…
>OTU_1920	AAGTCGTAACAAGGTTTCCGTAGGTGAACCTGCGGAAGGATCATTACCGAGCGAGAATTCTCTGAATTCAACCTCCCACCCGTGTTTATTGTACCTTGTTGCTTCGGCGGGCCCGCCTCACGGCCGCCGGGGGGCATCTGCCCCCGGGCCCGCGCCCGCCGAAGACACCTTGAACTCTGTATGAAAATTGCAGTCTGAGTCTAAATATAAATTATTTAAAACTTTCAACAACGGATCTCTTGGTTCCG
>OTU_1921	AAAGTCGTAACAAGGTCTCCGTTGGTGAACCAGCGGAGGGATCATTACAGAGTTGAAAAACTCCCCTAAACCATTGTGAACCTACCACTAAACAGTTGCTTCGGCGGGTGGGCGCCCCCTCCCCAGGGAAGGGCCGCCCCGCTAGACCGCCCGCCGGAGGTACCCAAAACTCTTGTTTAACTAAAAGGCCTCTCTGAGTACTGTACTTAAATAAGTCAAAACTTTCAACAACGGATCTCTTGGTTCTG
>OTU_1922	AAGTCGTAACAAGGTTTCCGTAGGTGAACCTGCGGAAGGATCATTAACAAATCATGATTGTTGCCGAGTCCGTAAGGTCTCGGGGACAAATAAGCCCGAACCTGTGTCTTCGGACCGGGTTAGGTGTTGAGGCGAGAGCCTCAGCGGTGAAGGCATTCGTGCTGGATCCACATAGACGCTTGTATGTTTGACAGTTTACAGTTGACACTTAAAAATGACAACTTTTAACAATGGATCTCTTGGCTCTT
>OTU_1923	AAGTCGTAACAAGGTTTCCGTAGGTGAACCTGCGGAAGGATCATTACCGAGTGAGGGCCCTCTGGGTCCAACCTCCCACCCATGTTTATCGTACCTTGTTGCTTCGGCGGGCCCGCCGCAAGGCCGCCGGGGGGCTTCCGCCCCCGGGTCCGCGCCCGCCGAAGACATCTTGAACGCTGTATGAAGATTGCAGTCTGAGCGAGAAGCTAAATTAATTAAAACTTTCAACAACGGATCTCTTGGTTCCG
>OTU_1924	AAGTCGTAACAAGGTTTCCGTAGGTGAACCTGCGGAAGGATCATTACCGAGTGAGGGCCCTCTGGGTCCAACCTCCCACCCGTGTTTATTTTACCTTGTTGCTTCGGCGAGCCTGCCTTCGGGCTGCCGGGGGGCATCTGCCCCCGGGTCCGCGCTCGCCGGAGACACCTTGAACTCTGTCTGAAGATTGTAGTCTGAGACAAAATATAAATTATTTAAAACTTTCAACAACGGATCTCTTGGTTCCG
>OTU_1925	AAGTCGTAACAAGGTTTCCGTAGGTGAACCTGCGGAAGGATCATTACAGAGTTGCAAAACTCCCTAAACCATTGTGAACGTTACCTAAACCGTTGCTTCGGCGGGCGGCCCCGGGGTTCTCCCCGGGCGCCCCTGGGCCCCATCGCGGGCGCCCGCCGGAGGTCACCAAACTCTTGATAATTTATGGCCTCTCTGAGTCTTCTGTACTGAATAAGTCAAAACTTTCAACAACGGATCTCTTGGTTCTG
>OTU_1926	AAGTCGTAACAAGGTCTCCGTTGGTGAACCAGCGGAGGGATCATTACAGAGTTGCAAAACTCCCTAAACCATCGTGAACCTACCGCTAAACAGTTGCTTCGGCGGGTGGCGGGCGTGCCCCCCCAGGGGGGAAGCCCGCCGCCGAGCCCGCCGGAGGAAAACCAAAACTCTTGTTTTTACTACCGGCCTCTCTGAGTATACTTACTTAAAATAAGTCAAAACTTTCAACAACGGATCTCTTGGTTCTG
>OTU_1927	AAGTCGTAACAAGGTTTCCGTAGGTGAACCTGCGGAAGGATCATTATGAATTTGAGCAAGTTCTTTTTCTCTTTTCCGAGAGGGAGAGGGCTTTCATTTTCTGTGAACTGTTGGAGAGGTGGCTTGAGCAATCAAGTTGTCTTTTCTCTTTTGTTATCTTGTCTTCTATTCCAATTGTGATGATTCCTTACGGAATCCATCCaaaaaaaaaaCCAAGACAACTTTCAGCAATGGATCTCTTGGCTCTT
>OTU_1928	AAGTCGTAACAAGGTCTCCGTTGGTGAACCAGCGGAGGGATCATTAAAGAGTTGCAAAACTCCAACCATCGCGAATGTAACCTTCTACAAGTTGCTTCGGCGGGCGGCCCTGAGAGGGGCCGCGCTTCTGCTCGCGCGCGCGCGGGAGAGCAAGCCCGCCGGAGTCGTACAAACTCTGTATTTTGTTGGCATCTCTGAGTAACTTACACAATAAGTTAAAACTTTCAACAACGGATCTCTTGGTTCTG
>OTU_1929	AAGTCGTAACAAGGTTTCCGTAGGTGAACCTGCGGAAGGATCATTATTATTTGGGTAGGGTTTACTTCTAAGATCTGTTCAGTCCCGTCCTAGTATTTAAGAGGTAAACTTTTACCAAATAACCTATATTTTTCCTATAGGAGCAAGATAAACTTATATTTAAAACCAACACTTTGAATGTATATTTTTTGTATTTTTAAATGATAATTAATAAAAGATCACTTTCAACAACGGATCTCTTGGCTCTC
>OTU_193	GGGAATTTTGCACAATGGGGGAAACCCTGATGCAGCAACGCCGCGTGGAGGATGAAGCCCCTTGGGGCGTAAACTCCTTTCGATCGGGACGATTATGACGGTACCGGAAGAAGAAGCACCGGCTAACTCTGTGCCAGCAGCCGCGGTAATACAGAGGGTGCAAGCGTTGTTCGGAATTATTGGGCGTAAAGGGCGCGTAGGCGGTGCGGTAAGTCAGCTGTGAAATCTCCGGGCTCAACTCGGAGCCTGCAGTTGAAACTGCCGTGCTTGAGTATGGGAGAGGTGAGTGGAATTCCCGGTGTAGCGGTGAAATGCGTAGATATCGGGAGGAACACCTGTGGCGAAAGCGGCTCACTGGACCATAACTGACGCTGAGGCGCGAAAGCTAGGGGAGCAAAC…
>OTU_1930	AAGTCGTAACAAGGTCTCCGTTGGTGAACCAGCGGAGGGATCATTACAGAGTTGCAAAACTCCCAAACCATTGTGAACGTTACCTTTAACCGTTGCTTCGGCGGGCGGCTCCGGGATCACTCCCGGGGCCCCCGGCCCTACTCGGGCGCCCGCCGGAGGTATCTAACTAACTCTTGACAATTGTATGGCCTCTCTGAGTCTTTGTACTTAATAAGTCAAAACTTTCAACAACGGATCTCTTGGTTCTG
>OTU_1931	AAGTCGTAACAAGGTCTCCGTTGGTGAACCAGCGGAGGGATCATTACCGAAGTTACCTTCAAAACCCACTGTGAACCTTACCTCTTGCCGCGTTGTCTCGGCGGGAGGCGGGGTGCGTCAAGGCCCTCGGGCCGCGCCGCTCCCCGTCCCCGCCGGCGGCGCCAAACTCTAAATGCACAGCGGACTGTACGTTCTGATTTACaaaaaaaaaCAAGTTAAAACTTTCAACAACGGATCTCTTGGTTCTG
>OTU_1932	AAGTCGTAACAAGGTCTCCGTTGGTGAACCAGCGGAGGGATCATTACAGGACTCGCAAGACTCCTACAACCCTGTGAACTTCACTACAAGCACGTTGCTTCGGCGGGTGTCTCGGCGGAGGTCCCCACTGGGGGCCTGCGCAGGGGCGCGAAGCCCGCCGGCAGCCTACTATACTCTGTCTCTTTGCGTTGGCATCTCGAGAAAAAGCAAACAAGTTAAAACTTTCAACAACGGATCTCTTGGTTCTG
>OTU_1933	AAGTCGTAACAAGGTCTCCGTTGGTGAACCAGCGGAGGGATCATTAAAGAGTTTCAAAACTCCTTACAACCATCGCGAACCCTACCTAGAACCGTTGCTTCGGCGGGCGGGCGCCCCGTGCGCCCCCCGGGCCCCCACTCGCTAGGGGCGCCCGCCGGAGGTACCTAACTCTTGTTTGATCACATGGCCCCTCTGAGTCTTCTGTACTAAATAAGTCAAAACTTTCAACAACGTATCTCTTGGTTCTA
>OTU_1934	AAGTCGTAACAAGGTCTCCGTAGGTGAACCTGCGGAGGGATCATTACACAACAAAATATGAAGGCCCTGGCTTCGCGGCCGGCTGAAATATTTTTTCACCCATGTCTTTTGCGCACTTGTTGTTTCCTGGGCGGGTTTGCCCGCCACCAGGACCAAACCATAAACCtttttttttATGCAGTTACCATCAGCGTCAGTAAAAACAATGTAATTAATTACAACTTTCAACAACGGATCTCTTGGTTCTG
>OTU_1936	AAGTCGTAACAAGGTCTCCGTTGGTGAACCAGCGGAGGGATCATTACAGAGTTGCAAAACTCCCAACCATTGTGAACCTACCTCACCGTTGCTTCGGCGGGTGGCGCCCCCTCACCCGGGGCGCCGCGCCGGCCCCTCCCCCGGGGCCCGGCAACCCGTCAGAGGCCCGCAACTCTTAGTCATCATTGGCCTCTCTGAGTAACTTATACAATAAGTCAAAACTTTCAACAACGGATCTCTTGGTTCTG
>OTU_1938	AAGTCGTAACAAGGTAACCGTAGGTGAACCTGCGGTTGGATCATTACCAAAAGAAGGACTTTGAGTCCCTTTTTAAACGCTAGTGCCCTTTAAACGGCCTAGTAAACCCCTTGTGAACTGTTTATTGTCTCTGGCAGGACCACTCTTTCGAGTACCTGCCAGTCAACTTATTAAACCCCGTTTTTAAACAATGTCTTATCAAATGTAAAAATTTGAAACAACTTTTGACAACGGATCTCTTGGCTCTC
>OTU_1939	AAGTCGTAACAAGGTTTCCGTAGGTGAACCTGCGGAAGGATCATTACTGAGTGAGGGCCCTCTGGGTCCAACCTCCCACCCGTGTTTATTGTACCTTGTTGCTTcggcgcgcccgcctcacggccgccggggggcatccgcccccgggcccgcgcccgccGAAGACACCATTGAACTCTTGTCTGAAGATTGCAGTCTGAGTACTATGAAAATTGTCAAAACTTTCAACAATGGATCTCTTGGTTCCG
>OTU_194	AAGTCGTAACAAGGTTTCCGTAGGTGAACCTGCGGAAGGATCATTAACAACGTATCCTAAACGTAAAAAACCCCCCCTGTGAACTTTCATAACCCGAGCTTGCTAGGCCCGCGAAATTCAGCAATCCCTGGTAAATCATTGTTGACCAGCTCTTTGAGTCAGGGATATCCGAACTTGTCGTGTGGATTAAGTTCCGTGAAGCCGGTACCCCCAAGCAATCAATGTTCTGTCAGTGTCGTTGATTGTGTAAGGGTGGCGCAGTAAACGATCGCTGGAGGCCACCACGGCCGGCGACTGGGTCAGCGAGCTCTGCTCCTTAATAACCCCACCTAAGGATTAGCTCGGCGAAAGCTTGAGCACCAAAAACTAATACGACTGTTAACAATGGATATCTTGGTT…
>OTU_1940	AAGTCGTAACAAGGTCTCCGTTGGTGAACCAGCGGAGGGATCATTACAGAGTTGCAAAACTCCCTAAACCATTGTGAACGTTACCTTCAAACCGTTGCTTCGGCGGGTTGGCTCCGGGTCTCCCGGGGCCCCCGGCCCTACTCGGGCGCCCGCCGGAGGTATCTAACTAACTCTTGACAATTGTATGGCCTCTCTGAGTCTTTGTACTTAATAAGTCAAAACTTTCAACAACGGATCTCTTGGTTCTG
>OTU_1941	AAGTCGTAACAAGGTCTCCGTTGGTGAACCAGCGGAGGGATCATTACAGAGTTGCAAAACTCCCAAACCATTGTGAACGTTACCTTCAAACCGTTGCTTCGGCGGGCGGCTCCGGGTCCGCCCGTTGCCCCTCGGCCCCCCCTGCGGGGGCGCCCGCCGGAGGAAACCCAACTCTTGATTTCCATGGCCTCTCTGAGTCTTCTGTACTGAATAAGTCAAAACTTTCAACAACGGATCTCTTGGTTCTG
>OTU_1942	AAGTCGTAACAAGGTTTCCGTAGGTGAACCTGCGGAAGGATCATTACCGAGTGAGGGCCCTCTGGGTCCAACCTCCCACCCGTGTTTATTATACCTTGTTGCTTCGGTGGGCCCGCCGTATGGCCGCCGGGGGGCTTCTGCCCCCGGGCCCGTGCCCGCCGAAGACACCTAGAACTCTGTCTGAAGATTGTAGTCTGAGTGAAAATATAAATTATTTAAAACTTTCAACAACGGATCTCTTGGTTCCG
>OTU_1943	AAGTCGTAACAAGGTCTCCGTTGGTGAACCAGCGGAGGGATCATTACAGAGTTGCAAAACTCCCTAAACCATTGTGAACGTTACCTTCAAACCGTTGCTTCGGCGGGCGGCCCGGGTCCGCCCGGTGCCCCCTGGCCCCCTCGCGGGGCGCCCGCCGGAGGTACCCCAAACCATTGATACTTTATGGCCTCTCTGAGTCTTCTGTACTGAATAAGTCAAAACTTTCAACAACGGATCTCTTGGTTCTG
>OTU_1944	AAGTCGTAACAAGGTCTCCGTTGGTGAACCAGCGGAGGGATCATTACAGTAGTCGCCCGGGTTGCCGCAAGGCCTCCCGGGTAACCTACCACCCTTTGTTTATTACACTTTGTTGCTTTGGCAAGCCTGCCCTCGGGCCGCTGGCTCCGGCCGGCGAGCGCTTGCCAGAGGACCTAAACTCTGTTTGTTTATACTGTCTGAGTACTATATAATAGTTAAAACTTTCAACAACGGATCTCTTGGTTCTG
>OTU_1945	AAGTCGTAACAAGGTTTCCGTAGGTGAACCTGCGGAAGGATCATTACAGTAGTCGCCCGGGTTGCCGCAAGGCCTCCCGGGTAACCTACCACCCTTTGTTTATTACACTTTGTTGCTTTGGCAAGCCTGCCCTCGGGCTGCTGGCTCCGGCCGGCGAGCGCTTGCCAGAGGACCTAAACTCTGTTTGTTTATACTGTCTGAGTACTATATAATAGTTAAAACTTTCGGCAACGGATCTCTTGGCTCCC
>OTU_1946	AAGTCGTAACAAGGTTTCCGTAGGTGAACCTGCGGAAGGATCATTAACAAATCATCATAGGTGCCGCAAGGCCCTATATACACCCCAAGCCTGGGAAGAGCTGTGGCTCGGATCGGCTTTGGTTGCAGCCCTCGGGCTGTAGGTCGGGCTGCCGAAAGGCGGCCAGGCCACATAGACGCTTGTATGTTTGACAGAGTTTAGTTGCATCATAAAAAATACAACTTTTAACAATGGATCTCTTGGCTCTT
>OTU_1947	AAGTCGTAACAAGGTTTCCGTAGGTGAACCTGCGGAAGGATCACTAGTGATTAAATCGAGAGCGTCTTCATTGACCTCTCACCCTTCACATCCACATACACCCTGTGAATCGTTTGGCTTTCTCTTCATTAATAGAACGCAAGTTCGACAAGTGAAGAGGAGTCATCATTTATACATACCCCAGTCTTATGAATGTAACAGTTTTAATAAACAAAATAAAACTTTTAACAACGGATCTCTTGGTTCTC
>OTU_195	AAGTCGTAACAAGGTTTCCGTAGGTGAACCTGCGGAAGGATCATTAACAACATATCCTAACTAAAAAACCCCCCTGTGAACTTTCAACCCCAAATCGCTTGATCCGAGTACCTCAGCAATCTCTGGTAAATCATTGTGAACAGCTTTGAGTCAGAGACCTCTGAATAACCTTGCGCGGTCGCGGTTGGTGAGGCAAGTGACCCGGTACCCCCAAGCAATCAATGTTCTGTCAGTGTCGTTGATTGTGTAAGGGTGGCGCAGTAAACGATCGCTGGAGGCCACCACGGCCGGCGACTGGGTCAGCGAGCTCTGCTCCTTAATAACCCCACCTAAGGATTAGCTCGGCGAAAGCTTGAGCACCAAAAACTAATACGACTGTTAACAATGGATATCTTGGTT…
>OTU_1950	AAGTCGTAACAAGGTCTCCGTTGGTGAACCAGCGGAGGGATCATTACAGAGTTGCAAAACTCCCTAAACCATCGCGAACGTTACCCCAAACCGTTGCTTcggcgggcggccgcgggctcacccccgcggcccccgggccccctccagggcgcccgccggAGGTACCTAACCCTTTACGCATGTATGGCCTCTCTGAGTCTTCTGTACTGAATAAGTCAAAACTTTCAACAACGGATCTCTTGGTTCTG
>OTU_1951	AAGTCGTAACAAGGCTCCCGTAGGTGAACCTGCGGAAGGATCATTACAGTAGTCACCCAGGTTGCCGCAAGGCCTCCTGGGTAACCTACCACCCTTGGTTTATTACACTTTGTTGCTTTGGCAAGCCTGCCCTCGGGCTGCTGGCTCCGGCCGGCGAGCGCTTGCCAGAGGACCTAAACTCTGTTTGTCTATACTGTCTGAGTACTATATAATAGTTAAAACTTTCAACAACGGATCTCTTGGTTCTG
>OTU_1953	AAGTCGTAACAAGGTTTCCGTAGGTGAACCTGCGGAAGGATCATTACCGAGTGAGGGCCCTCTGGGTCCAACCTCCCACCCGTGTTTATCATACCTAGTTGCTTCGGCGGGCCCGCCGTCATGGCCGCCGGGGGGCACTCGCCCCCGGGCCCGCGCCCGCCGAAGACCCCCCTGAACGCTGTCTGAAGATTGCAGTCTGAGTACTATGAAAATTGTCAAAACTTTCAACAATGGATCTCTTGGTTCCG
>OTU_1954	AAGTCGTAACAAGGTCTCCGTTGGTGAACCAGCGGAGGGATCATTATCGAGTTACAAAACTCCCAAACCATTGTGAACATACCATCGTTGCTTCGGCGGGACGCCCCAGGCGCCGGCGGCCTCTGCGCTGCCGTGCCCCGGAACCAGGCGCCCGCCGGGGGACCCAAACTCTTGTCTTTATAGTGGGATATTCTGAGTCTTACACAAATAAGCAATCAAAACTTTCAACAACGGATCTCTTGGTTCTG
>OTU_1955	AAGTCGTAACAAGGTCTCCGTTGGTGAACCAGCGGAGGGATCATTACAGAGTTGCAAAACTCCCTAAACCATTGTGAACGTTACCTTCAAACCGTTGCTTCGGCGGGCGGCCCGGGTCCGCCCGGTGCCCCCTGGCCCCCTTGCGGGGCGCCCGCCGGAGGAAAACCCAACTCTTGACAATTGTATGGCCTCTCTGAGTCTTTGTACTTAATAAGTCAAAACTTTCAACAACGGATCTCTTGGTTCTG
>OTU_1957	AAGTCGTAACAAGGTTTCCGTAGGTGAACCTGCGGAAGGATCATTACCGAGTGAGGGCCCTCTGGGTCCAACCTCCCACCCGTGTTTATCGTACCTTGTTGCTTCGGCGGGCCCGCCTCACGGCCGCCGGGGGGCATCCGCCCCCGGGCCCGCGCCCGCCGAAGACACACAAACGAACTCTTGTCTGAAGATTGCAGTCTGAAAAAACTTAATAGTTACAACTTTCAACAACGGATCTCTTGGTTCTG
>OTU_1959	AAGTCGTAACAAGGTTTCCGTAGGTGAACCTGCGGAAGGATCATTACCGTGAAGCGGCTGGGGGACCATCCCCCGGCGCGCCGACCCTGTGTGTACGCTCTGGTTGCTTCGGCGGGCCGTCCGCTTGTCGGCCGCCGGCCTCGGCCGGTGTGCGCCCGCCGGAAGACCGTCCAACCCTGTCTTACGGTGACGTCCGAGCAAACATTGAGAAATCAGCAAAACTTTCAACAACGGATCTCTTGGTTCCG
>OTU_196	GGGAATATTGGACAATGGGCGAAAGCCTGATCCAGCGACGCCGCGTGAGCGATGAAGTATTTCGGTATGTAAAGCTCTATCAGCAGGGAAGAAAATGACGGTACCTGACTAAGAAGCCCCGGCTAACTACGTGCCAGCAGCCGCGGTAATACGTAGGGGGCAAGCGTTATCCGGATTTACTGGGTGTAAAGGGAGCGTAGACGGAAGTGCAAGTCAGAAGTGAAAGCCCGGGGCTTAACCCCGGGACTGCTTTTGAAACTGTGCATCTAGAGTGCAGGAGAGGTAAGCGGAATTCCTAGTGTAGCGGTGAAATGCGTAGATATTAGGAGGAACACCGGTGGCGAAGGCGGCTTACTGGACTGTAACTGACGTTGAGGCTCGAAAGCGTGGGGAGCAAAC…
>OTU_1960	AAAAGTCGTAACAAGGTCTCCGTTGGTGAACCAGCGGAGGGATCATTACAGAGTTGCAAAACTCCCTAAACCATTGTGAACGTTACCTTATACCGTTGCTTCGGCGGGCGGACCGGGTCCTGCCCGGCGCCCCTCGGCCCCTCGCGGGGCGCCCGCCGGAGGTAAACCAAACTATTGCATTGTATGGCCTCTCTGAGTCTTCTGTACTGAATAAGTCAAAACTTTCAACAACGGATCTCTTGGTTCTG
>OTU_1961	AAGTCGTAACAAGGTCTCCGTTGGTGAACCAGCGGAGGGATCATTACAGAGTTGCAAAACTCCCAAACCATTGTGAACGTTACCTTTAACCGTTGCTTCGGCGGGCGGCTCCGGGATCACTCCCGGGGCCCCTGGGCCCCACCGCGGGCGCCCGCCGGAGGTTACCCAAACTCTTGATACATTATGGCCACTCTGAGTCTTCTGTACTGAATAAGTCAAAACTTTCAACAACGGATCTCTTGGTTCTG
>OTU_1962	AAGTCGTAACAAGGTTTCCGTAGGTGAACCTGCGGAAGGATCATTACCTGGCCTTGGGCCACTCCTGCATGGCGGTCACGCCTTCGGGGGTGCTTAGCCCTTGACTATCACCTTGACTATGCGTACCTTTGTTGTTTCCTCGGCAGGCTTCCTGCCGATGGAACCCTTTACAACCCTTTTGCAGTAGCATCAAACTGAAAACAAACCACAATTATTTACAACTTTCAACAATGGATCTCTTGGTTCTG
>OTU_1963	AAGTCGTAACAAGGTCTCCGTTGGTGAACCAGCGGAGGGATCATTACACAACAAAATATGAAGGTCTGGCTTCGCGGCCGGCTGAAATATTTTTTTCACCCATGTCTTTTGCGCACTTGTTGTTTCCTGGGCGGGTTCGCCCGCCACCAGGACCAAACCATAAACCtttttttttATGCAGTTGCAATCAGCGTCAGTAAAAACAATGTAATTAATTACAACTTTCAACAACGGATCTCTTGGTTCTG
>OTU_1964	AAGTCGTAACAAGGTCTCCGTTGGTGAACCAGCGGAGGGATCATTACAGAGTTGCAAAACTCCCAACCATTGTGAACCTACCTCACCGTTGCTTCGGCGGGTGGCCCCGGGGCAACCCGGAGCCGCGCCGGCCCCGCTACCGGGGCCCGGCAAACCCGTCAGAAGACCGAAACTCTTCGTCATCATTGGCCTCTCTGAGTAACTTATACAATAAATCAAAACTTTCAACAACGGATCTCTTGGCTCTG
>OTU_1965	AAGTCGTAACAAGGTTTCCGTAGGTGAACCTGCGGAAGGATCATTACCGAGTGAGGGCCCTCTGGGTCCAACCTCCCACCCATGTTTATTGTACCTTGTTGCTTCGGCGGGCCCGCCTTTGTGGCCGCCGGGGGGCTCTGCCCCCGGGCCCGCGCCCGCCGAAGACACCTAGAACTCTGTCTGAAGATTGCAGTCTGAGTGAAAATATAAATTATTTAAAACTTTCAACAACGGATCTCTTGGTTCCG
>OTU_1966	AAGTCGTAACAAGGTTTCCGTAGGTGAACCTGCGGAAGGATCATTACCGAGTGCGGGCCCTCTGGGCCCAACCTCCCACCCGTGTTTACTGTACCTTGTTGCTTCGGCGGGCCGGCCGTCAGGCCGCCGGGGGCTTCACGCCCCGGGCCCGCGCCCGCCGAAGACACCCCTGAACGCTGTCTGAAGATTGCAGTCTGAGCGATAAGCAAAATTAGTTAAAACTTTCAACAACGGATCTCTTGGTTCCG
>OTU_1967	AAGTCGTAACAAGGTTTCCGTAGGTGAACCTGCGGAAGGATCATTACCGAGTGAGGGCCCTCTGGGTCCAACCTCCCACCCGTGTTTTCCGAACCCTGTTGCTTCGGCGGGCCCGCCTCACGGCCGCCGGGGGGCTTCCGCCCCCGGGCCCGCGCCCGCCGAAGACACCTGTGAACGCTGTCTGAAGTTGCAGTCTGAGAAACTAGCTAAATTAGTTAAAACTTTCAACAACGGATCTCTTGGTTCCG
>OTU_1968	AAGTCGTAACAAGGTTTCCGTAGGTGAACCTGCGGAAGGATCATTACAGTAGTCATCCGGGTTGCCGCAAGGCCTCCCGGGTAACCTACCACCCTTTGTTTATCACACTTTGTTGCTTTGGCAGGCCTGCCTCCGGGCTGCTGGCTCCGGCCGGCGAGCGCTTGCCAGAGGACCCAAACTCTGTTTGTCTGTAACGTCTGAGTACTATATAATAGTTAAAACTTTCAACAACGGATCTCTTGGTTCTG
>OTU_1969	AAGTCGTAACAAGGTTTCCGTAGGTGAACCTGCGGAAGGATCATTCATAATTGAGTGTTTTATGGCACTCTTTAAAAAAATCCATATCCACCTTGTGTGCAACGTTTTTGAACTCTCTCTGGCGTTAAAAAACCAAGAGGGTTTGATTAACTTAACTTAACACCTTTAAAGCAGTTTGTCTGAATATCTATTTCTGAATAAACATAATTCAAAAATACAACTTTCAACAACGGATCTCTTGGCTCTC
>OTU_197	GGGAATATTGCACAATGGGGGAAACCCTGATGCAGCGACGCCGCGTGGAGGAAGAAGGTCTTCGGATTGTAAACTCCTGTTGTTGAGGAAGATAATGACGGTACTCAACAAGGAAGTGACGGCTAACTACGTGCCAGCAGCCGCGGTAAAACGTAGGTCACAAGCGTTGTCCGGAATTACTGGGTGTAAAGGGAGCGCAGGCGGGAAGACAAGTTGGAAGTGAAATCCATGGGCTCAACCCATGAACTGCTTTCAAAACTGTTTTTCTTGAGTAGTGCAGAGGTAGGCGGAATTCCCGGTGTAGCGGTGGAATGCGTAGATATCGGGAGGAACACCAGTGGCGAAGGCGGCCTACTGGGCACCAACTGACGCTGAGGCTCGAAAGTGTGGGTAGCAAAC…
>OTU_1970	AAGTCGTAACAAGGTTTCCGTAGGTGAACCTGCGGAAGGATCATTACCGAAGTACAGGCCCGCTCGCGGGCTCAACTTCCACCCTCTGTTTACCATTCTCTGTTGCTTTGGCGAGACGTCCCTCACAGGCCACCGGCTTCGGCTGGTGCGTGCTCGCCAGAGAAAACCCAAACCCAAACATATTTTAGTGATTGTCTGAAAACAAGTTTAATAATTAAAACTTTCAACAACGGATCTCTTGGCTCTG
>OTU_1971	AAGTCGTAACAAGGTTTCCGTAGGTGAACCTGCGGAAGGATCATTACAAGAGTATTTCAGTTTGGCTTTATGCCCTCTGAAAATCTCCACCCTTTGTTTACATTACCTTTGTTGTTGCCTCGGTGGGTGCTTTCTAGCACCTGCCGGCAGACACCTTCAAAAACCCTTGATTTAATACTATAGTCAGAGCTGTAACAAGCAAAAGATTAATAAATCAAAACTTTCAACAACGGATCTCTTGGTTCTG
>OTU_1972	AAGTCGTAACAAGGTCTCCGTAGGTGAACCTGCGGAGGGATCATTACCGAGTTTCGTGCCCGTACGGGTAGATCTCCCACCCTATGTTATTATTACCTTGTTGCTTTGGCGGGCCGCCAGGCTCCGGTCAGGCTATCGGCTTCGGCTGGTAAGCCGCCCGCCAGAGGACCCAATATTCCTGATTATCAGTGTCGTCTGAGTACTATGATAATAGTTAAAACTTTCAACAACGGATCTCTTGGTTCTG
>OTU_1973	AAGTCGTAACAAGGTCTCCGTAGGTGAACCTGCGGAGGGATCATTACAGAGTTCATGCCCTCACGGGTAGATCTCCCACCCTTGTGTATTCATACCTTTGTTGCTTTGGCAGGCCGCTGGGCTTCGGCCTGGCCACCGGCTCCCGGGCTGGTGCGCGCCTGCCAGGGGACCTCTAAACTCTGTTTGTCAGTGTCGTCTGAGTATTATACAATCGTTAAAACTTTCAACAACGGATCTCTTGGTTCTG
>OTU_1974	AAGTCGTAACAAGGTTTCCGTAGGTGAACCTGCGGAAGGATCATTAGCGAAGAAGGATGCGCCCGCGTGGCGTAATTCTCCATCACCATGTGAACTTGGATTTTATTGATGCGAGGTCGGGCGCGAGTCTTTAACCGGGCTCGCGACCGCTCTCGTACAAAACCGTTGACAAACCGCCAAACCGAATAACTAGATCGTAACGACGAAACCAAACACACAACTTTTAACAATGGATCTCTAGGCTCCT
>OTU_1975	AAGTCGTAACAAGGTCTCCGTTGGTGAACCAGCGGAGGGATCATTACAGAGTTGCAAAACTCCCTAAACCATTGTGAACGTTACCTTCAAACCGTTGCTTCGGCGGGCGGCCCGGGTCCGCCCGGTGCCCCCTGGGCCCCACCGCGGGCGCCCGCCGGAGGTCACCAAACTCTTGATAATTTATGGCCTCTCTGAGTCTTCTGTACTGAATAAGTCAAAACTTTCAACAACGGATCTCTTGGTTCTG
>OTU_1976	AAGTCGTAACAAGGTTTCCGTAGGTGAACCTGCGGAAGGATCATCAAAGAGTGATCGTGAAGGTGTTGTTGTTTATGCAGCGCCTCCACACCAATCTtgtgtgaactgtttttctgtggtgtgtgttggtgtgtgatgtgttgtgtCGCAGCACTCCCACCAGCATCACAAACAATCTCCTTTCAACCTTTGTCTAACATGTACCCACAATTTAAAACAACTTTTAACAATGGATCTCTTGGCTCTC
>OTU_1977	AAGTCGTAACAAGGTTTCCGTAGGTGAACCTGCGGAAGGATCATTACCTTTCAATGCAGCAGAATTGGGATGGTTGAGTATCTCGCCTTTCAATCCTGCCTGTATTCCACCCTTGTTTTTCATACACTATTATTTCCTCGGCAGGCTTGCCTGCCGGGTGAAACCATTTATAACCTATTCAATTTTCAATCAGCGTCTGaaaaaaaaTTAATAATTACAACTTTCAACAACGGATCTCTTGGTTCTG
>OTU_1978	AAGTCGTAACAAGGTCTCCGTTGGTGAACCAGCGGAGGGATCATTACAGAGTTGCAAAACTCCCTAAACCATTGTGAACGTTACCTAAACCGTTGCTTCGGCGGGCGGCCCCGGGGTTCTCCCCGGGCGCCCCTGGGCCCCATCGCGGGCGCCCGCCGGAGGTAAACCAAACTATTGCATTAATGGCCTCTCTGAGTCTTCTGTACTGAATAAGTCAAAACTTTCAACAACGGATCTCTTGGTTCTG
>OTU_1979	AAGTCGTAACAAGGTCTCCGTTGGTGAACCAGCGGAGGGATCATTACAGGGTCTGACGACACCCAAACCCAACCGTGAACCATTTCCGATCAAATGCTTCGGCGGGTCGCTCGCTGGGGGAGCCCTGGGCCGCATTTGGTGGCCCGCCGGAGCAGGCAAACAATCAACTATTCTGAGTTACTTCTGAGAAAGTCTTTTCTAAATTGAGAAATAATCACAACTCATAACAATGGATCTCTTGGCTCTG
>OTU_198	AAGTCGTAACAAGGTTTCCGTAGGTGAACCTGCGGAAGGATCATTAACAACGTATCCTAAACGTAAAAAACCCCCCCTGTGAACTTTCATAACCCGAGCTTGCTAGGCCCGCGAAATTCAGCAATCCCTGGTAAATCATTGTTGACCAGCTCTTTGAGTCAGGGATATCCGAACTAGTCGTGTGGATTAAGTTCCGTGAAGCAAGAGCGGTGAGGCAAGTGACCCGGTACCCCCAAGCAATCAATGTTCTGTCAGTGTCGTTGATTGTGTAAGGGTGGCGCAGTAAACCGGCGACTGGGTCAGCGAGCTCTGCTCCTTAATAACCCCACCTAAGGATTAGCTCGGCGAAAGCTTGAGCACCAAAAACTAATACGACTGTTAACAATGGATATCTTGGTT…
>OTU_1980	AAGTCGTAACAAGGTTTCCGTAGGTGAACCTGCGGAAGGATCATTAAAAACAAATTGTCTTTATGATTATTTCAACCACTTGTGAACCAAAAAATCTTACGCTTCGGTAGCAAGCTTGGTCCCTTCATTGGGTCAAGCCGTCAGCCTGCCGGCAGCACTACAAACCAAACCTGTTTTAAAACATTGTCTGAACAAAACCATTTTCGAATGAAAATTAAAACTTTCAACAACGGATCTCTTGGTTCTC
>OTU_1981	AAGTCGTAACAAGGTTTCCGTAGGTGAACCTGCGGAAGGATCATTATTGAATCCTCAGGATGTTGCTGGCTCTTCGGAGCATGTGCACTCCGCCTTTTCAATCCACCTGTGAACTTATTGTAGGCTGGATGTAACAGTCCATGCCTATGTCTTCATAAACCCTTTATAAAAGTCTATGGAATGTCTTGTTGTAGGCCTTATGGTCAAAAAATTAATACAACTTTCAACAATGGATCTCTTGGTTCTC
>OTU_1982	ACAAAAATTAAGCCATAAACGAAAGTTTGACTAAGTTATATTAATTAGGGTTGGTAAATCTCGTGCCAGCCACCGCGGTCATACGATTAACCCAAGCTAACAGGAGTACGGCGTAAAACGTGTTAAAGCACCATACCAAATAGGGTTAAATTCTAACTAAGCTGTAAAAAGCCATGATTAAAATAAAAATAAATGACGAAAGTGACCCTACAATAGCCGACGCACTATAGCTAAGACCCAAACTGGG
>OTU_1983	AAGTCGTAACAAGGTCTCCGTTGGTGAACCAGCGGAGGGATCATTGCCGGGTCGCAAGACTCCAAACCATCGCGAACATACCGTGTCGTTGCCTCGGCGGGCGGCTCCAGGGCGGAGCCTCCGGCCCCCCGCGAGGGGGGTGCCCGCCGGCGGCCCCGCAAACGTTGTCGTATCTAGGCCCCTCTGAGTCATCCCGCGAGAGCGGACAAAACAATCAAAACTTTCAACAATGGATCTCTTGGCTCTG
>OTU_1984	AAGTCGTAACAAGGTCTCCGTTGGTGAACCAGCGGAGGGATCATTAAAGAGTTTCAAAACTCCTTACAACCATCGCGAACCCTACCTACAACCGTTGCttcggcgggcgggcgccccgtgcgccccccgggcccccacccgctgggggcgcccgccggAGGTACCTAACTCTTGTTGATCACACGGCCTCTCTGAGTCTTCTGTACTGAATAAGTCAAAACTTTCAACAACGGATCTCTTGGTTCTG
>OTU_1985	AAGTCGTAACAAGGTTTCCGTAGGTGAACCTGCGGAAGGATCATTACCAAGAGAAATCTTTCAACACTGAAAGATCTTTTCCTTTGTGCTGGCTTTGACCGTATGTAATTTTGGGACTTTAAAATGGTTCGCAAGGGCCGGTCCCAAAAACAATATATCATCCTTATGAAATTTTTTCTGAACAATTAAACAAATGATTTTAATAATCTGTTTAAAACAACTTTCAACAACGGATCTCTTGGTTCTC
>OTU_1986	AAGTCGTAACAAGGTTTCCGTAGGTGAACCTGCGGAAGGATCATTAAAGTATATTGAATTTATATTCATATCAACCCACTCTGTGTACCTTCTTACTGTTGCTTCCATGGGACTTGGCTATGCCACGTCGGCCTTCGGGCTGGTGAGCGCCCATGGGAGGAAATCAAAACTCTTTTTTATACGTGACGTCTGTCTGAACTGTTTATTATAAACGTTAAAACTTTCAACAACGGATCTCTTGGTTCTC
>OTU_1987	AAGTCGTAACAAGGTTTCCGTAGGTGAACCTGCGGAAGGATCATTACCGAAGTACAGGCCCCCTCGGGGGCTAAACTTCCACCCTTTGTCTACCTTACCATTGTTGCTTTGGCGAGCCGCCCTCAAAAGCCACCGGCCTCGTGCTGGTGAGCGCTCGCCGGAGAACCCCAAACCCAAACCATTTACAGTGTCGTCTGAAAACAAGTTTAAATTATTAAAACTTTCAACAACGGATCTCTTGGCTCTG
>OTU_1988	AAGTCGTAACAAGGTCTCCGTTGGTGAACCAGCGGAGGGATCATTACCGAGTTTTCAACTCCCAAACCCCTGTGAACATACCTATCGTTGCCTCGGCGGGAGAGCCCCGGGCGCTGGCGCGAGCCTCGCACCGGTACCAGGCGCCCGCCGGAGGACCCAACCATAAACTCTTTGCATTCTAGAGAATCTTCTGAGTGACCATAAGCAAATAAAATTAAAACTTTCAACAACGGATCTCTTGGTTCTG
>OTU_1989	AAGTCGTAACAAGGTCTCCGTAGGTGAACCTGCGGAGGGATCATTACAGAGTTGCAAAACTCCCAAACCCACTGTGAATCTTACCCGACGTTTCGTTGCTTCGGCAGGCGGTCCCAGGGCGGGACCCGCGGCCTTCACAGGCGCCTGCCGGGGGGACCACACGCTCTGTTATTTTGTTATTTTGTTTCCAAGTCTTCTAGAAAGACTAAATAAGTCAAAACCTTCAACAACGGATCTCTTGGTTCTG
>OTU_199	GGGAATATTGCTCAATGGGGGAAACCCTGAAGCAGCAACGCCGCGTGGAGGATGAAGGTTTTAGGATTGTAAACTCCTTTTGTGAGAGAAGATAATGACGGTATCTCACGAATAAGCACCGGCTAACTCCGTGCCAGCAGCCGCGGTAATACGGAGGGTGCAAGCGTTACTCGGAATCACTGGGCGTAAAGAGTGCGCAGGCGGGCTTGTAAGTCAGATGTGAAATCCTGTAGCTTAACTACAGAACTGCATTTGAAACTATGAGTCTAGAGTGTGGGAGAGGTAGGTGGAATTCTTGGTGTAGGGGTAAAATCCGTAGATATCAAGAGGAATACTCATTGCGAAGGCGACCTACTGGAACATTACTGACGCTCATGCACGAAAGCGTGGGGAGCAAAC…
>OTU_1990	AAGTCGTAACAAGGTCTCCGTTGGTGAACCAGCGGAGGGATCATTAAAAAATAGGGCACTTATGCGCTATAAACCACTGTAAACCTACCTCGTCTCGTTGCCTCGGCGGGCGGCTCCCGGGGGAGCCCTCCTGGCCAGCGCGGTGCCCGCCGGCAGCGACCCCATTATCTACTCTGAAAGTCTCCTCTGAGTGGCACGCTGAAGAGCAAAACTATCAAAACTTTCAACAACGGATCTCTTGGCTCTG
>OTU_1991	AAGTCGTAACAAGGTTTCCGTAGGTGAACCTGCGGAAGGATCATTATCAATGTGAACTGTGGTTCTCTTTTTCTTGTAAAAGAGAGTCTGTTCTTGTGAACTGGGGTTCTTTTTCTCCCTTTTTCGAAAGGAGAGAGAGAGGCCCGCCTGttttttattcttgttttttcttttttttttCTGTTGACTTTAGGTCAAGAGAGAGAAAAATCAGAGACAACTTTCAGCAATGGATCTCTTGGCTCTT
>OTU_1992	AAGTCGTAACAAGGTCTCCGTTGGTGAACCAGCGGAGGGATCATTACAGAGTTGCAAAACTCCCAAACCATTGTGAACGTTACCTTTAACCGTTGCTTCGGCGGGCGGCTCCGGGATCACTCCCGGGGCCCCTGGGCCCCCCAGCGGGGCGCCCGCCGGAGGTAAACCAAACTATTGCATTAATGGCCTCTCTGAGTCTTCTGTACTGAATAAGTCAAAACTTTCAACAACGGATCTCTTGGTTCTG
>OTU_1993	AAGTCGTAACAAGGTTTCCGTAGGTGAACCTGCGGAAGGATCATTATGAATTTGATTGGGTGGCttttttttttAAAAGGCTGCTTTCATTTTCTGTGAACTGGCGCTCTTCTCTTTTTGGAGGGATTGGAGTGTATTTTGTATTCTTGATTTCTATTCCAAATTGATTTGATTGAATCTCTGCAAGGAGACTTGATTGAATTATATAAAACCAAGACAACTTTCAGCAATGGATCTCTTGGCTCTT
>OTU_1994	AAGTCGTAACAAGGTCTCCGTTGGTGAACCAGCGGAGGGATCATTACAGAGTTGCAAAACTCCCTAAACCATTGTGAACGTTACCTTCAAACCGTTGCTTCGGCGGGCGGCCCGGGTCCGCCCGGTGCCCCTGGGCCCCCCAGCGGGGCGCCCGCCGGAGGTCACCTAACTCTTGATAATTTATGGCCTCTCTGAGTCTTCTGTACTGAATAAGTCAAAACTTTCAACAACGGATCTCTTGGTTCTG
>OTU_1995	AAGTCGTAACAAGGTCTCCGTTGGTGAACCAGCGGAGGGATCATTACAGAGTTGCAAAACTCCCAAACCATTGTGAACGTTACCTTTAACCGTTGCTTCGGCGGGCGGCTCCGGGATCACTCCCGGGGCCCCTGGGCCCCTCGCGGGCGCCCGCCGGAGGTACCCCAAACCATTGATACTTTATGGCCTCTCTGAGTCTTCTGTACTGAATAAGTCAAAACTTTCAACAACGGATCTCTTGGTTCTG
>OTU_1996	AAGTCGTAACAAGGTTTCCGTAGGTGAACCTGCGGAAGGATCATTACCTTTCAATGCAGCAGAATTGGGATGGTTGAGTATCTCGCCTCTCCGTTCTGCCTGTATTCTACCCTTGTTTGTCATATACTATTATTTCCTCGGCAGGCTTGCCTGCCGAGTGAAACCATTTATAACCTTTTTAATTTTCAATCAGCGTCTGAAAAAAATTAATAATTACAACTTTCAACAACGGATCTCTTGGTTCTGG
>OTU_1997	AAGTCGTAACAAGGTTTCCGTAGGTGAACCTGCGGAAGGATCATTACAGTATTCTTTTGCCAGCGCTTAACTGCGCGGCGAAAAACCTTACACACAGTGTCTTTTTGATACAGAACTCTTGCTTTGGTTTGGCCTAGAGATAGGTTGGGCCAGAGGTTTAACAAAACACAATTTAATTATTTTTATTGATAGTCAAATTTTGAATTAATCTTCAAAACTTTCAACAACGGATCTCTTGGTTCTCGCA
>OTU_1998	AAGTCGTAACAAGGTTTCCGTAGGTGAACCTGCGGAAGGATCATTACAAGATTGGAGGCTGGCGGCGCCTGGCGGGCATGCCTGTCCGGTTACGTCCAGCCCCACTCCTCACCTTGCCTACTGCACCGTTTGTTGCTTCCTGGCGGCGGCGTCCCGCCGCCAGGGGCTTGTAAAAGCCTTGTATAAGCATTGATATCCTGATGTACACTAAATCATACAACTTTCAACAATGGATCTCTTGGTTCTG
>OTU_2	AAGTCGTAACAAGGTTTCCGCCGAACTGATTCTTCCCAGTGAAGCTTTGGGTGGGCGCGACTCTAAATAATGCTACCGCTTCAGTCCCCCGCCGCAACGGGGGGCCACGTCACAAAAATGCTGGGACGCTTAGCAATAGGCGCACCAGCAGCCGGGGCAGCTGTTCCCTGGTCCACAGATTAGGTGGTGACGGTCAAGGCACACGCCGGCCTTGGATCGAGATATAATCGGTCCCCTGCCGTAACGGCAGCGCGAGCACACGTTCCGTAGGTGAACCTGCGGAAGGATCATTATCGAGCTAGGGTCCTCTGGGCCCGACCTCCAACCCTTGTCTATTCTACCATGTTGCTTCGGCGGGCCCGTCTCTGACCGCCGGGGGCCCCTCTCCGCCCCTGGCCA…
>OTU_20	AAGTCGTAACAAGGTTTCCGTAGGTGAACCTGCGGAAGGATCATTAACACGATTCGAAATTGTTTTCTTGAACAACAAACCAAGACTTCAATTTTTCAACCCAAAACCCAAACCCACCGTGAACTGTTTCTTCTCCCTAAAAAGTTCTGTTGAGGGGaaaaaaaaaCTCCttttgctctgctttttaggctaaacctttttttgtaaaatttttttttcaaactcattttgtagcatttttcctttcgtttGACTTGTTTTGAACTAGGAAAAACTATTCAACTTGAATCGACCTGTGGAAGGAACTTGATCAGTCTTTTTCAATAAAAATTCTGGTTTTGTTTTCATCCCTCTGATGACTTTTTTAGTTGATCGTACTGAATTGAATTGTTTTTCTTT…
>OTU_200	AAGTCGTAACAAGGTATCCGTAGGTGAACCTGCGGATGGATCATTAACAAAAAGTGAATCATCAGATATTTTGGTGGATCTTGTCGCCTGGGAAACGGTTGAGATTCATTTTCTGTTGAAGCACTATAATCCATTCAGGCGTCGTATGGAAACGTTCGGCGCACCCTTCCCCTTTCTCGGAGTCTGATATTCCTATTAGCACTCTGGGGATGAACATTAATGTGTTTATTGTATTATACAGGCTTGTATTGTATAGTAGACACATCCCTGACTCTTCACAGAGTCAACACTACATGTTGTTTTGGTGCATTCGTGCCAACAATAGTTTATTTGTCATAGCGACTAGAAATTTTATGTTGAATTAAACCAATACAACTGTTAGCAACGGATCACTCGGCT…
>OTU_2000	AAGTCGTAACAAGGTCTCCGTTGGTGAACCAGCGGAGGGATCATTACAGAGTTGCAAAACTCCCTAAACCATTGTGAACGTTACCTAAACCGTTGCTTcggcgggcgggccggccccagggccgcgccccccaggcccccccgcggggcgcccgccggAGGAAACCAAACTCTTGATACTTTATGGCCTCTCTGAGTCTTCTGTACTGAATAAGTCAAAACTTTCAACAACGGATCTCTTGGTTCTG
>OTU_2001	AAGTCGTAACAAGGTCTCCGTTGGTGAACCAGCGGAGGGATCATTACCGAGTTTACAAACTCCCAAACCCTTTGTGAACCTTACCTATCGTTGCTTCGGCGGGATCGCCCCGGGCCGCCCCTTCACGGGGGCCTCCGGAACCAGGCGCCCGCCGGAGAACCCAAACTCTTGTTTTATATGGTTTTCTCCTCTGAGTGGATTATAAACAAATAAATCAAAACTTTCAACAACGGATCTCTTGGTTCTG
>OTU_2002	AAGTCGTAACAAGGTTTCCGTAGGTGAACCTGCGGAAGGATCATTATTGAATGAACTTGGTGTGGTTGTCGCTGGCCCCTTGGGGCATGTGCACATCCCACCATCCTCATCTCTCCACCTGTGCACCTCTTGTAGACTTGGTCTACGTTTTTTCATATACCCCATAGCATGTAACAGAATGTATCATATTGGGCGCTTGTGCCTTATAAACCTTATACAACTTTCAGCAACGGATCTCTTGGCTCTC
>OTU_2003	AAGTCGTAACAAGGTCTCCGTTGGTGAACCAGCGGAGGGATCATTACAGAGTTGCAAAACTCCCTAAACCATTGTGAACGTTACCTTCAAACCGTTGCTTCGGCGGGAGGCCCGGGTCCGCCCGGTGCCCCCTGGCCCCCTAGCGGGGCGCCCGCCGGAGGTAAACCAAACTATTGCATTGTATGGCCTCTCTGAGTCTTCTGTACTGAATAAGTCAAAACTTTCAACAACGGATCTCTTGGTTCTG
>OTU_2004	AAGTCGTAACAAGGTTTCCGTAGGTGAACCTGCGGAAGGATCATTAATAACGCCCCGTTTTTGTCGCAAGATTTAAATGGGTTCAATACCCAAAACCGTGTCTACCTACCTTTGTTGCTTTGGCAGGCCGCCTTCGGGCGTCGGCTTCGGCTGATTAGCGCTTGCCAGAGGCCCAAAACTCTGTGTTTAGTGATGTCTGAGTACTATAAAATATTTAAAACTTTCAACAACGGATCTCTTGGTTCTG
>OTU_2005	AAGTCGTAACAAGGTCTCCGTTGGTGAACCAGCGGAGGGATCATTACAGAGTTGCAAAACTCCCTAAACCATTGTGAACGTTACCTTCAAACCGTTGCTTCGGCGGGCGGCCCGGGTCCGCCCGGTGCCCCCTGGCCCCCTAGCGGGGCGCCCGCCGGAGGAAACCCAACTCTTGTTTCATTTTGGATACTCTGAGTATTATACAAATAAGCAATCAAAACTTTCAGCAACGGATCTCTTGGCTCTG
>OTU_2006	AAGTCGTAACAAGGTCTCCGTTGGTGAACCAGCGGAGGGATCATTACAGAGTTGCAAAACTCCCTAAACCATTGTGAACGTTACCTAAACCGTTGCTTCGGCGGGCGGCCCCGGGGTTCTCCCCGGGCGCCCCTGGGCCCCTAGCGGGGCGCCCGCCGGAGGAAACCCAACTCTTGATTATTATGGCCTCTCTGAGTCTTCTGTACTGAATAAGTCAAAACTTTCAACAACGGATCTCTTGGTTCTG
>OTU_2007	AAGTCGTAACAAGGTCTCCGTTGGTGAACCAGCGGAGGGATCATTACAGAGTTGCAAAACTCCCTAAACCATTGTGAACGTTACCTTCAAACCGTTGCTTCGGCGGGCGGCCCGGGTCCGCCCGGTGCCCCCTGGCCCCCTAGCGGGGCGCCCGCCGGAGGTACCTAACCCTTTACGCATGTATGGCCTCTCTGAGTCTTCTGTACTGAATAAGTCAAAACTTTCAACAACGGATCTCTTGGTTCTG
>OTU_2008	AAGTCGTAACAAGGTTTCCGTAGGTGAACCTGCGGAAGGATCATTATGAATTTGTCGAGTCTTTTTCTAAAGTCTCTTCGTTTTCTGTGAACTGGATCGTTTTTTTCTTGTTGGCTCTGTTATCCTTTATGGATTGTGGAGTTGACTTGAAATCGCGATTGCTTTATTGTTATTCTGTTGTGTTTATTTTTTTACAAGTTTTCTTTGTAATGAAAGACAACTTTCAGCAATGGATCTCTTGGCTCTT
>OTU_2009	AAGTCGTAACAAGGTCTCCGTTGGTGAACCAGCGGAGGGATCATTACAGAGTTGCAAAACTCCCAAACCATTGTGAACGTTACCTTTAACCGTTGCTTCGGCGGGCGGCTCCGGGATCACTCCCGGGGCCCCTGGGCCCCCCAGCGGGGCGCCCGCCGGAGGTATACAACCCTTGTACTTTGTATGGCCTCTCTGAGTCTCTGTACTTAATAAGTCAAAACTTTCAACAACGGATCTCTTGGTTCTG
>OTU_201	GGGAATATTGCACAATGGGCGAAAGCCTGATGCAGCGACGCCGCGTGAGCGAAGAAGTATTTCGGTATGTAAAGCTCTATCAGCAGGGAAGATAATGACGGTACCTGACTAAGAAGCACCGGCTAAATACGTGCCAGCAGCCGCGGTAATACGTATGGTGCAAGCGTTATCCGGATTTACTGGGTGTAAAGGGAGCGCAGGCGGTGCGGCAAGTCTGATGTGAAAGCCCGGGGCTCAACCCCGGTACTGCATTGGAAACTGTCGTACTAGAGTGTCGGAGGGGTAAGCGGAATTCCTAGTGTAGCGGTGAAATGCGTAGATATTAGGAGGAACACCAGTGGCGAAGGCGGCTTACTGGACGATAACTGACGCTGAGGCTCGAAAGCGTGGGGAGCAAAC…
>OTU_2010	AAGTCGTAACAAGGTCTCCGTTGGTGAACCAGCGGAGGGATCATTACAGAGTGTTCTAAACACCCTAAACCCCTGTGAACCTACCAGTCGTTGCTTCGGCGGGATCGCCCCGGGCGCCTCACAGCGCCCCGGAACCAGGCGCCCGCCGGGGGAAACCAAACTCTTGTTTTTGTATAGTGGCTTACTCTGAGTGGCTCCTAGCGAGCAAAAAATGTCAAAACTTTCAACAACGGATCTCTTGGTTCTG
>OTU_2011	AAGTCGTAACAAGGTTTCCGTAGGTGAACCTGCGGAAGGATCATTACCTTTCAATGCAGCAGAATTGGGATGGTTGAGCATCTCGCCTCTCAATTTCTGCCTGTATTCCACCCTTGTTTTTCGCACACTATTATTTCCTCGGCAGGCTTGCCTGCCGAGTGAAACCATTTATAACCTATTTAATTTTCAATCAGCGTCTGAAAAAAATTAATAATTACAACTTTCAACAACGGATCTCTTGGTTCTG
>OTU_2012	AAGTCGTAACAAGGTCTCCGTTGGTGAACCAGCGGAGGGATCATTACAGAGTTGCAAAACTCCCTAAACCATTGTGAACGTTACCTCCAACCGTTGCTTCGGCGGGCGGCACCGGGTcccccccccGGTGCCCCTCGGCCCTCGCGGGCGCCCGCCGGAGGTAAACCAAACTATTGCATTGTATGGCCTCTCTGAGTCTTCTGTACTGAATAAGTCAAAACTTTCAACAACGGATCTCTTGGTTCTG
>OTU_2013	AAGTCGTAACAAGGTCTCCGTTGGTGAACCAGCGGAGGGATCATTACTGAGTTACCGCTCTACAACCCTTTGTGAACATACCTAACTGTTGCTTCGGCGGGCAGAGGTTCCCTCGCGGAACCCCTCCCGGTGACGCCCTCACGGGCGTCGCGCCCGCCGGAGGATACCAAACTCTATTTTAACGACGTTTCTTCTGAGTGGCACAAGCAAATAATTAAAACTTTTAACAACGGATCTCTTGGTTCTG
>OTU_2014	AAGTCGTAACAAGGTTTCCGTAGGTGAACCTGCGGAAGGATCATTACCGAAGTACAGGCCCTTTTATAGGGCTACACTTCCACCCTTTGTTTACTATTCTTTGTTGCTTTGGCGAGACGTCCTCGGACCACCGGCCTTCGGGCTGGTGCGCGCTCGCCAGAGAAAATTCAAACCCAAACCATTTTAAGTGTCGTCTGAGAAACAAGTTTAATTATTAAAACTTTCAACAACGGATCTCTTGGCTCTG
>OTU_2015	AAGTCGTAACAAGGTTTCCGTAGGTGAACCTGCGGAAGGATCATTACCGAGTGTAGGGTTCCTAGCGAGCCCAACCTCCCACCCGTGTATACCGTACCTTGTTGCTTCGGCGAGCCCGCCCCCTTTTTCTTTTAGGGGGCACAGCGCTCGCCGGAGACACCAACGTGAACACTGTCTGAAGTTTTGTCGTCTGAGTCGATTGTATCGCAATCAGTTAAAACTTTCAACAATGGATCTCTTGGTTCCG
>OTU_2016	AAGTCGTAACAAGGTTTCCGTAGGTGAACCTGCGGAGGGATCATTACAGAGTTGCAAAACTCCCAACCATTGTGAACCTACCTCACCGTTGCTTCGGCGGGTGGCGCCCCCTCACCGGAAGCGCCGCGCCGGCCCCTCCCCGGGGCCCGGCAACCCGTCAGAGGCCCGCAACTCTTAGCCATCATTGGCCTCTCTGAGTAACTTATACAATAAGTCAAAACTTTCAACAACGGATCTCTTGGTTCTG
>OTU_2018	AAGTCGTAACAAGGTTTCCGTAGGTGAACCTGCGGAAGGATCATTACACTTGGGGGCTCCGAAAGGGCCCTCTGCTGCCGCAAGGTGGCAACCACACCCTCTGTCTACCTCTACCTCTTGTTGTTTCCTCGGCAGGCAGCTTACGCCAGCCGCTAGGAATACCTTAAACCCTTGTATTCGAAGCATCCAAAACTCTGATAACAAAACAAATAAATCACAACTTTCAACAATGGATCTCTTGGTTCTG
>OTU_2019	AAGTCGTAACAAGGTTTCCGTAGGTGAACCTGCGGAAGGATCATTAACGAGAGTTGCCCTTTTCTGGGCAAACCTCCCACCCTTTGTGTACCTTTACCCTGTTGCTTTGGCAGGCCCGTCCACTCGGACCGCCGGCTCACGCTGGCCCGCGCCTGCCAGAGGACCAACCAAAAACTCTTGTTTTACGTGTCGTCTGAGTGTAATAAGCAATGAATCAAAACTTTCAACAACGGATCTCTTGGTTCTG
>OTU_202	GGGAATATTGGACAATGGGCGAAAGCCTGATCCAGCAATGCCGCGTGAGTGATGAAGGCCTTAGGGTTGTAAAGCTCTTTTACCCGGGATGATAATGACAGTACCGGGAGAATAAGCTCCGGCTAACTCCGTGCCAGCAGCCGCGGTAATACGGAGGGAGCTAGCGTTGTTCGGAATTACTGGGCGTAAAGCGCACGTAGGCGGCTTTGTAAGTCAGAGGTGAAAGCCTGGAGCTCAACTCCAGAACTGCCTTTGAGACTGCATCGCTTGAATCCAGGAGAGGTGAGTGGAATTCCGAGTGTAGAGGTGAAATTCGTAGATATTCGGAAGAACACCAGTGGCGAAGGCGGCTCACTGGACTGGTATTGACGCTGAGGTGCGAAAGCGTGGGGAGCAAAC…
>OTU_2021	AAGTCGTAACAAGGTCTCCGTTGGTGAACCAGCGGAGGGATCATTACAGAGTTGCAAAACTCCCTAAACCATTGTGAACGTTACCTACAAACCGTTGCttcggcgggcggctccgggcccgcccggtgcccctcggcccccccagcggggcgcccgccggAGGAAACCCAACTCTTGATATCATGGCCTCTCTGAGTCTTCTGTACTGAATAAGTCAAAACTTTCAACAACGGGTCTCTTGGTTCTG
>OTU_2023	AAAGTCGTAACAAGGTTTCCGTAGGTGAACCTGCGGAAGGATCATTACCTTTCAATGCAGCAGAATGGGGATGGTTGAGTTTCTCGCCTCTCTGTTCTGCCTGTATTCTACCCTTGTTTGTCATATACCATTATTTCCTCGGCAGGCTTGCTTGCCGAGTGAAACCAATTATAACCTATTTAATTTTCAATCAGCGTCTGAACAAAATTAATAATTACAACTTTCAACAACGGATCTCTTGGTTCTG
>OTU_2024	AAGTCGTAACAAGGTCTCCGTTGGTGAACCAGCGGAGGGATCATTACAGAGTTGCAAAACTCCCAAACCATTGTGAACGTTACCTTCAAACCGTTGCTTCGGCGGGAGGCCCGGGTCCGCCCGGTGCCCCCTGGCCCCCTAGCGGGGCGCCCGCCGGAGGTTACCCAAACTCTTGATACATTATGGCCACTCTGAGTCTTCTGTACTGAATAAGTCAAAACTTTCAACAACGGATCTCTTGGTTCTG
>OTU_2025	AAGTCGTAACAAGGTCTCCGTTGGTGAACCAGCGGAGGGATCATTAAAGAGTTGCAAAACCCCCTAAACCATTGTGAACATACCTTCAACGTTGCTTCGGCGGGCGGCCCCGGGGTTCTCCCCGGGCGCCCCTGGGCCCCATCGCGGGCGCCCGCCGGAGGTCACCAAACTCTTGATAATTTATGGCCTCTCTGAGTCTTCTGTACTGAATAAGTCAAAACTTTCAACAACGGATCTCTTGGTTCTG
>OTU_2026	AAGTCGTAACAAGGTCTCCGTTGGTGAACCAGCGGAGGGATCATTACAGAGTTGCAAAACTCCCTAAACCATTGTGAACGTTACCTAAACCGTTGCTTCGGCGGGCGGCACCGGGTcccccccccGGTGCCCCTCGGCCCTCGCGGGCGCCCGCCGGAGGTTACCAAACTCTTTGATACCTTATGGCCTCTCTGAGTCTTCTGTACTGAATAAGTCAAAACTTTCAACAACGGATCTCTTGGTTCTG
>OTU_2027	AAGTCGTAACAAGGTTTCCGTAGGTGAACCTGCGGAAGGATCATTACAGTAGTCGCCCGGGTTGCCGCAAGGCCTCCCGGGTAACCTACCACCCTTTGTTTATTACACTTTGTTGCTTTGGCAAGCCTGCCCTCGGGCTGCTGGCTCCGGCCGGCGAGCGCTTGCCAGAGGACCTAAACTCTGTTTGTTTATACTGTCTTCTGTACTGAATAAGTCAAAACTTTCAACAACGGATCTCTTGGTTCTG
>OTU_2028	AAGTCGTAACAAGGTCTCCGTTGGTGAACCAGCGGAGGGATCATTACAGAGTTGCAAAACTCCCTAAACCATTGTGAACGTTACCTAAACCGTTGCTTCGGCGGGCGGCCCCGGGGTTCTCCCCGGGCGCCCCTGGGCCCCATCGCGGGCGCCCGCCGGAGGTCACCAAACCCTTGATTATTATGGCCTCTCTGAGTCTTCTGTACTGAATAAGTTAAAACTTTCAACAACGGATCTCTTGGTTCTG
>OTU_2029	AAGTCGTAACAAGGTCTCCGTTGGTGAACCAGCGGAGGGATCATTACAGAGTTGCGAAACTCCATAAACCATTGCGAACCCACCACTGAACAGTTGCTTCGGCGGGTGGCTGGCAGGGCACCCCTAGCTGGGGCCGGCCGCCGCGAAACCCGCCGGAGGCACCCAAACTCTTGTTTGTTACAGGCCTCTCTGAGTTATAGCACTTGAATAAAGTCAAAACTTTCAACAACGGATCTCTTGGTTCTGG
>OTU_203	AAGTCGTAACAAGGTTTCCGTAGGTGAACCTGCGGAAACGTAAAAAACCCCCCCTGTGAACTTTCATAACCCGAGCTTGCTAGGCCCGCGAAATTCAGCAATCCCTGGTAAATCATTGTTGACCAGCTCTTTGAGTCAGGGATATCCGAACTAGTCGTGTGGATTAAGTTCCGTGAAGCAAGAGCGGTGAGGCAAGTGACCCGGTACCCCCAAGCAATCAATGTTCTGTCAGTGTCGTTGATTGTGTAAGGGTGGCGCAGTAAACGATCGCTGGAGGCCACCACGGCCGGCGACTGGGTCAGCGAGCTCTGCTCCTTAATAACCCCACCTAAGGATTAGCTCGGCGAAAGCTTGAGCACCAAAAACTAATACGACTGTTAACAATGGATATCTTGGTTC…
>OTU_2031	AAGTCGTAACAAGGTCTCCGTTGGTGAACCAGCGGAGGGATCATTACAGAGTTGCAAAACTCCCAACCATTGTGAACCTACCTCACCGTTGCTTCGGCGGGTGGCCAGGGGCAACCCAGGCCACGCCGGCGCCTCCCTTCGGGGCCCGGCAAGCCCGTCAGAAGACCGAAACTCTTCGTCATCAGTGGCCTCTCTGAGTAACTTATACAATAAGTCAAAACTTTCAACAACGGATCTCTTGGTTCTG
>OTU_2032	AAGTCGTAACAAGGTCTCCGTTGGTGAACCAGCGGAGGGATCATTACAGAGTTGCAAAACTCCCAAACCATTGTGAACGTTACCTAAACCGTTGCTTcggcgggcggccccggggtttaccccccgggcgcccctgggccccaccgcgggcgcccgccggGGGTCACCAAACTATTGCATTAATGGCCTCTCTGAGTCTTCTGTACTGAATAAGTCAAAACTTTCAACAACGGATCTCTTGGTTCTG
>OTU_2034	AAGTCGTAACAAGGTCTCCGTTGGTGAACCAGCGGAGGGATCATTGCCGGGTCGCAAGACTCCAAACCATCGCGAACCTACCGTGTCGTTGCCTCGGCGGGCGGCTCCAGGGCGGAGCCTCCGGCCCCCCCGCGCGGGGGGGTGCCCGCCGCCGGCCCAGCAAACGTTGTCGTATCTAGGCACCTCTGAGCAATGCCCGCGAGGGCGAAACGAATCAAAACTTTCAACAATGGATCTCTTGGCTCTG
>OTU_2035	AAGTCGTAACAAGGTCTCCGTTGGTGAACCAGCGGAGGGATCATTACAGAGTTGCAAAACTCCCTAAACCATTGTGAACCTACCACTAAACAGTTGCTTCGGCGGGTGGCGCGAGGGCCCCTTCACGGGGGCCGGAGCGCCCTAGACAGCCCGCCGGAGGTACTCAAACTCTTGTTTAACTAAAAGGCCTCTCTGAGTACTGTACTTAAATAAGTCAAAACTTTCAACAACGGATCTCTTGGTTCTG
>OTU_2036	AAGTCGTAACAAGGTCTCCGTTGGTGAACCAGCGGAGGGATCATTACAGAGTTGAAAAACTCCCCTAAACCATTGTGAACCTACCACTAAACAGTTGCTTCGGCGGGTGGGCGCCCCCTCCCCAGGGAAGGGCCGCCCCGCTAGACCGCCCGCCGGAGGTACCCAAAACTCTTGTTTAACTAAAAGGCCTCTCTGAGTAAAACAAACAAATAAATCAAAACTTTCAACAACGGATCTCTTGGTTCTG
>OTU_2038	AAGTCGTAACAAGGTCTCCGTTGGTGAACCAGCGGAGGGATCATTACCGAGTTTTTACAACTCCCAAACCCAATTGTGAACTTCTTAAAACGTTGCTTCGGCGCTGCGCCCCGGCACCCCCTCCGCGGGTGGCCGGGCCCAGGCGCTCGCCGAGGGCCCCAAACTCTTGTATTTAGAACAGCAGTCTGAGTGGCATTTATTGCAAACAAATGAATCAAAACTTTCAACAACGGATCTCTTGGTTCTG
>OTU_2039	AAGTCGTAACAAGGTCTCCGTTGGTGAACCAGCGGAGGGATCATTACAGAGTTGCAAGACTCCCAAACCACCGTGAACGTACCCAAAACCGTTGCTTCGGCGGGCGGCACCCGGGCCTCCCGGGCGCCTCTCGGCCCCCCCACGGGCGCCCGCCGGAGGTATACACAGACCCTTGTACTTTGTATGGCCTCTCTGAGTCTCTGTACCTAATAAGTCAAAACTTTCAACAACGGATCTCTTGGTTCTG
>OTU_204	AAGTCGTAACAAGGTTTCCGTAGGTGAACCTGCGGAAGGATCATTAACAACGTATCCTAAACGTAAAAAAACCCCCCTGAACCCGAGCTTGCTAGGCCCGCGAAATTCAGCAATCCCTGGTAAATCATTGTTGACCAGCTCTTTGAGTCAGGGTTCTCCGAACTTAAGTTCCGTGAAGCAAGAGCGGTGAGGCAAGTGACCCGGTACCCCCAAGCAATCAATGTTCTGTCAGTGTCGTTGATTGTGTAAGGGTGGCGCAGTAAACGATCGCTGGAGGCCACCACGGCCGGCGACTGGGTCAGCGAGCTCTGCTCCTTAATAACCCCACCTAAGGATTAGCTCGGCGAAAGCTTGAGCACCAAAAACTAATACGACTGTTAACAATGGATATCTTGGTTC…
>OTU_2040	AAGTCGTAACAAGGTCTCCGTAGGTGAACCTGCGGAGGGATCATTACCGAGTTCATGCCCTCTAGGGTAGATCTCCCACCCTATGTTATCATTACCTTTGTTGCTTTGGCGGGCCGCTCGGCACCTGCCCGGCTACCGGCTTCCCGCTGGTAAGCGCCCGCCAGAGGACCCCAAACTCTGAATTGTTAGTGTCGTCTGAGTACTATGTAATAGTTAAAACTTTCAACAACGGATCTCTTGGTTCTGG
>OTU_2041	AAGTCGTAACAAGGTCTCCGTTGGTGAACCAGCGGAGGGATCATTACAGAGTTGCAAAACTCCCTAAACCATTGTGAACGTTACCTCCAACCGTTGCTTCGGCGGGCGGCACCGGGTccccccccGGTGCCCCTCGGCCCTCGCGGGCGCCCGCCGGAGGTACCCCAAACCATTGATACTTTATGGCCTCTCTGAGTCTTCTGTACTGAATAAGTCAAAACTTTCAACAACGGATCTCTTGGTTCTG
>OTU_2042	AAGTCGTAACAAGGTTTCCGTAGGTGAACCTGCGGAAGGATCATTACCTTTCAATGCAGCAGAATTGGGATGGTTGAGTATCTCGCCTTCCAATTCTGCCTGTATTCCACCCTTGTTTTTCTTACACTATTATTTCCTCGGCAGGCTTGCCTGCCGAGTGAAACCAATTATATAACCTATTTAATTTTCAATCAGCGTCTGAAAAAATTAATAATTACAACTTTCAACAACGGATCTCTTGGTTCTG
>OTU_2043	AAGTCGTAACAAGGTCTCCGTTGGTGAACCAGCGGAGGGATCATTACAGAGTTGCAAAACTCCCAACCATTGTGAACCTACCTCACCGTTGCTTCGGCGGGTGGCTCGGGGCAACCCCGGCCGCGCCGGCTCCTCTTCAGGGGCCCGGCAAACCCGTCAGAGGACCGAAACCCTTCGTCATCAGTGGCCTCTCTGAGTAACTTATACAATAAGTCAAAACTTTCAACAACGGATCTCTTGGTTCTG
>OTU_2044	AAGTCGTAACAAGGTTTCCGTAGGTGAACCTGCGGAAGGATCATTACCTTTCAATGCAGCAGAATTGGGATGGTTGAGTTTCTCGCCTCTCTTTTCTGCCTGTATTCTACCCTTGTTTGTCATATACTATTATTTCCTCGGCAGGCAAGCCTGCCGAGTGAAGCCAATTACAACCTATTTAATTTTCAATCAGCGTCTGAAAAAAATTAATAATTACAACTTTCAACAACGGATCTCTTGGTTCTG
>OTU_2045	AAGTCGTAACAAGGTTTCCGTAGGTGAACCTGCGGAAGGATCATTATAGTATATGGAATCTCCATTCTATAAACCCACTCTGCGTATCTTGTAACTGTTGCTTCCATGGGACTTGGTTCCGCCACACCGGCTTCACGGCTGGTGAGCGCCCATGGAAGGAGAAACAAAACTCTTCTTTGAAATGTAGTCAGTCTGAACAAGTTTTTATAAACGTTAAAACTTTCAACAACGGATCTCTTGGTTCTC
>OTU_2046	AAGTCGTAACAAGGTCTCCGTTGGTGAACCAGCGGAGGGATCATTAAAGAGTTGCAAAACTCCCTAAACCATTGTGAACCTACCTTCAACCGTTGCTTCGGCGGGTTGGCACCGGGTCTCCCGGCGCCCCCGGCCCCCTCGCGGGGCGGCCCGCCGGAGGTACCTAACTCTTGAACATTGTATGGCCTCTCTGAGTCTTCTGTACTGAATAAGTCAAAACTTTCAACAACGGATCTCTTGGTTCTG
>OTU_2047	AAGTCGTAACAAGGTTTCCGTAGGTGAACCTGCGGAAGGATCATTAACGATATCTGACCCCTCGGGGTCAATCTCCAACCCTCTGTCTACCTACCTCTGTTGCTTTGGCAGTGGCCCGTGGCTCTCGCCACCGCCGGCTTCGGCTGGCCCGCGCCCGCCAGAGTCCTTAACCAAAACTCTGATTACGTGTCGTCTGAGTATAACTAAAATGAATCAAAACTTTCAACAACGGATCTCTTGGTTCTG
>OTU_2048	AAGTCGTAACAAGGTCTCCGTTGGTGAACCAGCGGAGGGATCATTACCGAGTTATTACTCCAAACCCTTTGTGAACCTTACCTATTACTGCTGTTGCCTCGGCGGACGGCCGGGAGGGCACCCCCTCGCGGGGCCGCCCGACCAGCCCCCGCCGGCAGCACCAAACTCTTGAATTTATAGCGAAACTACTTCTGAATAACAAAAACAAACGAATCAAAACTTTCAACAACGGATCTCTTGGTTCTG
>OTU_2049	AAGTCGTAACAAGGTTTCCGTAGGTGAACCTGCGGAAGGATCATTACAGAGTTGCAAAACTCCCAAACCATTGTGAACGTTACCTTCAAACCGTTGCTTCGGCGGGCGGCCCGGGTCCGCCCGGTGCCCCCTGGCCCCCTCGCGGGGCGCCCGCCGGAGGAAACCCAACTCTTGATACATTATGGCCTCTCTGAGTCTTCTGTACTGAATAAGTCAAAACTTTCAACAACGGATCTCTTGGTTCTG
>OTU_205	GGGAATATTGCACAATGGGGGAAACCCTGATGCAGCGACGCCGCGTGAGCGAAGAAGGTTTTCGGATCGTAAAGCTCTGTCCTTGGAGAAGATGATGACGGTATCCAAGGAGGAAGCCCCGGCTAACTACGTGCCAGCAGCCGCGGTAATACGTAGGGGGCGAGCGTTGTCCGGAATTACTGGGCGTAAAGGGTACGCAGGCGGTTTGATAAGTCAGGTGTAAAAGGCATTGGCTCAACCAATGTAAGCATTTGAAACTGTCAGACTTGAGTATAGGAGAGGTAAGTGGAATTCCTAGTGTAGCGGTGAAATGCGTAGATATTAGGAGGAACACCAGTGGCGAAGGCGACTTACTGGACTAAAACTGACGCTGAGGTACGAAAGCGTGGGGAGCAAACA…
>OTU_2050	AAGTCGTAACAAGGTTTCCGTAGGTGAACCTGCGGAAGGATCATTACAGTATATTGAATTCTTATTCATATCAACCCACACTGTGTACCTTTTATCTGTTGCTTCCATGGGACATGGCTCTGCCACGTCGGCCTTCGGGCTGGTGAGTTCCCATGGAAGGAAACCCAATACTCTTTTTATTTTTGACATCTGTCTGAATAGTTTTTATAAACGTTAAAACTTTCAACAACGGATCTCTTGGTTCTC
>OTU_2051	AAGTCGTAACAAGGTCTCCGTTGGTGAACCAGCGGAGGGATCATTACAGAGTTTCTATAACTCCCAAACCATTGTGAACCTTACCTCATACCGTTGCttcggcgggcgggccggccccagggccgcgccccccaggcccctcgcggggcgcccgccggAGGAAACCAAACTCTTGATTATTATGGCCTCTCTGAGTCTTCTGTACTGAATAAGTCAAAACTTTCAACAACGGATCTCTTGGTTCTG
>OTU_2052	AAGTCGTAACAAGGTTTCCGTAGGTGAACCTGCGGAAGGATCATTACCTTTCAATGCAGCAGGATTGGGGTGGTTGAGTATCTCGCCTCCTGATTCTGCCTGTATTCTACCCTTGTTTTTCTCATACTATTATTTCCTCGGCAGGCTTGCTTGCCGGGTGAAACCATTTATAACCTATTTAATTTTCAATCAGCGTCTGAACAAAATTAATAATTACAACTTTCAACAACGGATCTCTTGGTTCTG
>OTU_2053	AAGTCGTAACAAGGTCTCCGTTGGTGAACCAGCGGAGGGATCATTACCGAAGTTACTCTTCAAACCCACGTGTGAACCCTACCCCCTGCCGCGCGGTTGCCTCGGCGGGAGGTCTGGAGCGGGCAccgccccgcccccggcccccgccggccgcgccAGACTCTTCTCTTTGCGAAGCGGACTGCACGTTCTGATTTAGATTTTGAAAACAAGTCAAAACTTTCAACAACGGATCTCTTGGTTCTG
>OTU_2054	AAGTCGTAACAAGGTTTCCGTAGGTGAACCTGCGGAAGGATCATTACAGTAGTCGCCTAGGTGCCGCAAGGCTCCTAGGCAACCTACCACCCTTTGTTTATTACACTTTGTTGCTTTGGCAGACCTGCCCTCGGGCTGCTGGCTCCGGCCGGCGAGCGTCTGCCAGAGGACCTAAACTCTGTTTGTCTATACTGTCTGAGTACTATATAATAGTTAAAACTTTCAACAACGGATCTCTTGGTTCTG
>OTU_2055	AAGTCGTAACAAGGTCTCCGTTGGTGAACCAGCGGAGGGATCATTACAGAGTTGCAAAACTCCCAACCATTGTGTACCTACCTCACCGTTGCTTCGGCGGGTGGCCCGGGGCAACCCAGGCCGCGCCGGCCCCTCCTTCAGGGGCCGGCAAACCCGTCAGAGGACCGAAACTCTTCGTCATCAGTGGCCTCTCTGAGTAACTTATACAATAAGTCAAAACTTTCAACAACGGATCTCTTGGTTCTG
>OTU_2056	AAGTCGTAACAAGGTCTCCGTTGGTGAACCAGCGGAGGGATCATTACTGAGTGTAAAAACTCCCAACCCTTTGTGAACATACCTCTGTTGCTTCGGCGGATGCGCCCCGGGCGCGCCTTCTAGGAGGCGTGCCCCGGAACCAGGCGCCCGCCGGGGGACCTACAAACTCTTGTATTCCTAGCGGATCTCTGAGTGTGATTTAAACAAATCAAATCAAAACTTTCAACAACGGATCTCTTGGCTCTA
>OTU_2057	AAGTCGTAACAAGGTCTCCGTTGGTGAACCAGCGGAGGGATCATTACAAGAGTTGAAAAACTCCCTAAACCCCGTGTAAACTTACCTGTTCAGTTGCTTCGGCAGGCGGCCCCGGGGCGGGGCCTCCGGCCTGCGTTCAGCAGGTGCCTGCCGACAGCCCACTACTAAAAACTATGCTGTAACTGTACCGCTCAGAGTCACATAACAAATGAATCAAAACTTTCAACAACGGATCTCTTGGTTCTG
>OTU_2058	AAGTCGTAACAAGGTTTCCGTAGGTGAACCTGCGGAAGGATCATTAACTACCGGCACCCCTCCCGGGGGGTGCGCGGCTCGGGGCGACCCGTGCCGTCTGTAGTCCCTGTCTTTTCGAGTACCTGTTCCGTTTCCTCGGCGGGCCTGCCCGCCAGCGAGGACCCAAACCAAACCCTGAAGTGAGCGGTTACGTCTGAAAACAAACAAAATCTATCAAAACTTTCAACAACGGATCTCTTGGTTCTG
>OTU_2059	AAGTCGTAACAAGGTCTCCGTTGGTGAACCAGCGGAGGGATCATTACCGAGTTGCAAAACTCCCAAACCCATCGTCTACCTATCTCGCAAAGAGCCCTgcctcggcgggcggccccggggaggggccgcaggccggcgcgcgagcgccggcgcccgccggGAGGGCCTCAATTCGTATTTTTTTAGTGTCTCTCTGAGCCTAAAGACAAATAGTCAAAACTTTCAACAACGGATCTCTTGGTTCTG
>OTU_206	AAGTCGTAACAAGGTTTCCGTAGGTGGTTCGCCTGCGAATTCAGTCTGCTTAGCAGGCAACATCTCTACTGTGCTAGAAATTACAATAGTATTACTAGCAGCCTGCCTAGCAGGTTCACAGATCAAATAGAGGTGGCCCTTAGGGGTTAAGATATGATCGATTTGATGCTGAGATAGCATTTTTTTAATGGAACCTGCGGAAGGATCATTAAAGAGTATAGAGACTTCGGTCTACTACTCCACCCTTTGTTTACAATACCATTGTTGCTTTGGCAGGCCTGTCGTCAGACAACTGGCTTCGGCTGGTCAGTGCCTGCCAGAGGACCTAAAACTCATGTTTATATTATCGTCTGAGTACTATATAATAGTTAAAACTTTCAACAACGGATCTCTTGGTTC…
>OTU_2060	AAGTCGTAACAAGGTCTCCGTTGGTGAACCAGCGGAGGGATCATTACAGAGTTGCAAAACTCCCAACCATTGTGTACCTACCTCACCGTTGCTTCGGCGGGTGGCCCGGGGCAACCCAGGCTGCGCCGGCCCCTCTTCAGGAGCCTGGCAAACCCGTCAGAGGACCGAAACTCTTCGTCATCAGTGGCCTCTCTGAGTAACTTATACAATAAGTCAAAACTTTCAACAACGGATCTCTTGGTTCTG
>OTU_2061	AAGTCGTAACAAGGTTTCCGTAGGTGAACCTGCGGAAGGATCATTACTGAGTGCGGGCCCTCTGGGTCCAACCTCCCACCCGTGTATACTTACCGTGTTGCTTCGGCGGGCCCGCCTGTCAGGCCGCCGGGGGGCAACCGCCCCCGGGCCCGCGCCCGCCGAAGACCCCAACGAACTCTTGTACCTTGCAGTCTGAGCGATAAGCATAAATTATTAAAACTTTCAACAACGGATCTCTTGGTTCCG
>OTU_2062	AAGTCGTAACAAGGTTTCCGTAGGTGAACCTGCGGAAGGATCATTAACACTAATGAAATCCAAAACCTTTTGGATCAACCCAACCTTAGCGAACCGTTCGttttttttCCCTTTGCCCATCATTTTATGAAACGCAAACAAATCTGATGTAAAGTGTCTGATTCTTATTCCCGTTTTTCTTAATCGAAAAGCTGGAATCAAAAATCTAACGCAATACAACTCTTAACAACGGATATCTTGGCTCTC
>OTU_2063	AAGTCGTAACAAGGTCTCCGTTGGTGAACCAGCGGAGGGATCATTACCGAGTTTACAAACTCCCAAACCATTGTGAACGTTACCTTCAAACCGTTGCTTCGGCGGGCGGCCCGGGTCCGCCCGGTGCCCCCTGGCCCCCTCGCGGGGCGCCCGCCGGAGGAAACCCAACTCTTGATACATTATGGCCTCTCTGAGTCTTCTGTACTGAATAAGTCAAAACTTTCAACAACGGATCTCTTGGTTCTG
>OTU_2064	AAGTCGTAACAAGGTCTCCGTAGGTGAACCTGCGGAGGGATCATTACACAACAAAATATGAAGGTCTGGCTTCGCGGCCGGCTGAAATATTTTTTTCACCCATGTCTTTTGCGCACTTGTTGTTTCCTGGGCGGGTTCGCCCGCCACCAGGACCAAACCATAAACCTTTTTTATGCAGTTGCAATCAGCGTCAGTATAACAAATGTAAATCATTTACAACTTTCAACAACGGATCTCTTGGTTCTG
>OTU_2066	AAGTCGTAACAAGGTTTCCGTAGGTGAACCTGCGGAAGGATCATTAATGATTGCGAATCGTTGCCTTCTGTGCTGGCCAGCCACTGGCAAGTGCACGTCGGTGATGTTCATCCAATACCCTGTGAACCTTTGGCCTCTTGCTAGCTTCGGCCGGCAGAGGAATTTACACAAACTCGAATGTAATGAAATTTACTGTCGTGCGCAAGCACTAATGTACAACTTTCAACAACGGATCTCTTGGCTCTC
>OTU_2067	AAGTCGTAACAAGGTCTCCGTTGGTGAACCAGCGGAGGGATCATTACAGAGTTGCAAAACTCCCTAAACCATCGTGAACGTTACCCCACAATCGTTGCTTCGGCGGGCGGCGCCTCACCCGGCGCCCCCTGCCAGGGGCCCTAACGGGCGTCCGCCGGAGGCCTATAACCCTTGTATTATTTTACGGCTTCTCTGAGTTTATACTTAAATAAGTCAAAACTTTCAACAACGGATCTCTTGGTTCTG
>OTU_2068	AAGTCGTAACAAGGTCTCCGTTGGTGAACCAGCGGAGGGATCATTACCGAGTTTACAACTCCCAAACCCTTATGTGAACCGTACCTATCGTTGCTTCGGCGGGAACGCCCCGGCGCCCTGCGCCCGGATCCAGGCGCCCGCCGGAGACCCCAAACTCTTGTGTTTTTTTCAGCACTAGTATTTTTCCTCTGAGTGGCAAACGCAAAAAATCAATCAAAACTTTTAACAACGGATCTCTTGGCTCTG
>OTU_2069	AAGTCGTAACAAGGTTTCCGTAGGTGAACCTGCGGAAGGATCATTACCTTTCAATGCAGAAGAGTTGAGATGGTTGAGTATCTCGCCCCTCAATTCTCGCTGTATTTTACCCTTGTTTTTCTCATACTATTATTTCCTCGGCAGGCTCGCCTGCCGGGTGAAACAACTTCAAACCTGTTTAATTTTCAATCAGCGTCTGAAAAAATTTAATAATTACAACTTTCAACAACGGATCTCTTGGTTCTG
>OTU_207	GGGAATATTGCACAATGGAGGAAACTCTGATGCAGCGACGCCGCGTGAATGATGAAGGCCTTCGGGTCGTAAAGTTCTGTCCTTGGGGAAGATAATGACGGTACCCAAGGAGGAAGCCCCGGCTAACTACGTGCCAGCAGCCGCGGTAATACGTAGGGGGCGAGCGTTGTCCGGAATTATTGGGCGTAAAGGGTTCGCAGGCGGTCTGATAAGTCAGATGTGAAAGGCTATGGCTTAACCATAGTAAGCATTTGAAACTGTCAGACTTGAGTTAAGGAGAGGAAAGTGGAATTCCTAGTGTAGCGGTGAAATGCGTAGATATTAGGAGGAATACCAGTGGCGAAGGCGACTTTCTGGACTTAAACTGACGCTGAGGAACGAAAGCGTGGGGAGCAAACA…
>OTU_2070	AAGTCGTAACAAGGTCTCCGTTGGTGAACCAGCGGAGGGATCATTACCGAGTTATTACTCCAAACCCTTTGTGAACCTTACCGATTACTGCTGTTGCCTCGGCGGACGGCTGGGAGGGCAACCCCCCCGCGGGGTCGCCCGACCGCCCCCGCCGGCAGCACCAAACTCTTGAATTTATAGCGATTATACTTCTGAATAACAAAAACAAACGAATCAAAACTTTCAACAACGGATCTCTTGGTTCTG
>OTU_2071	AAGTCGTAACAAGGTTTCCGTAGGTGAACCTGCGGAAGGATCATTACCGAAGTCAAGGCCCCTTCGGGGGCTAAACTTCCACCCTTTGTTTACCTTACCATTGTTGCTTTGGCGGGCCGCCTTAGGCCACCGGCTCTCGAGCTGGTGCGTGCCCGCCAGAGACCCCCAAACCCAAACCATATTTAGTGTCGTCTGAAAACAAGTTTAAATTATTTAAAACTTTCAACAACGGATCTCTTGGCTCTG
>OTU_2072	AAGTCGTAACAAGGTCTCCGTTGGTGAACCAGCGGAGGGATCATTACAGAGTTGCAAAACTCCCTAAACCATTGTGAACGTTACCTATCCCGTTGCTtcggcgggcggcccgggccccgtgcccggcgccccccggcccctcgcgggcgcccgccggAGGTAAACCAAACCCTTGAATTGTATGGCCTCTCTGAGTCTTCTGTACTGAATAAGTCAAAACTTTCAACAACGGATCTCTTGGTTCTG
>OTU_2073	AAGTCGTAACAAGGTCTCCGTTGGTGAACCAGCGGAGGGATCATTACAGAGTTACTACTCCAAACCCATTGTGAACCTTACCTATGTTCTGTTGCCTCGGCGGCGTCGGTCAGCGCCCCTCTGAAAAGAGGACGATGCCCCTCCCGCCGGCAGCACCAAACTCTTGAATTTTTACAGCGGATTACAGTTCTGATTTGAAAACAAAAAAACAAGTTAAAACTTTCAACAACGGATCTCTTGGTTCTG
>OTU_2074	AAGTCGTAACAAGGTCTCCGTTGGTGAACCAGCGGAGGGATCATTACCGAGTTGCAAAACTCCCAAACCCATCGTCTACCTATCTCGCAAAGAGCCCCTGCCTCGGCGGGCGGCCCCGGGGAGGGGCCGCAGGCCGGCGCTCACGCGCTGGCGCCCGCCGGGAGGGCCCAAATTCGTATTTTTTAGTGTCTCTCTGAGCCTAAAGACAAATAGTCAAAACTTTCAACAACGGATCTCTTGGTTCTG
>OTU_2075	AAGTCGTAACAAGGTTTCCGTAGGTGAACCTGCGGAAGGATCATTAAAAAGGTTAAGAATACCATGTTCTTAAACCCCATCTGTGTACTTGTACCCGTTGCTTCCGTGGGCTGCGGGCCATGTGCCTGCATCTCTGCCGTCATGGTGGACCCACGGGAGGTATTCATAAACTCTGCCATTTGGTGATCTCGGTCTGAATATGTTTGATCAATGTTAAAACTTTCAACAACGGATCTCTTGGTTCTC
>OTU_2076	AAGTCGTAACAAGGTTTCCGTAGGTGAACCTGCGGAAGGATCATTACTGCTTGCTTATGGCCGCTGAGGGGGGAAACCCCCTCAGCGGTACGGCAACACCCACCCTTGACTATATATACCTTTCGTTATTTCCCTCGGCGGGGCAACCCGCCGCCGGGGACATCAAAACCCTCTTGCATCAAGCATCAAAACTTCTGAAACAAACCTAAACTATAACAACTTTCAACAATGGATCTCTTGGTTCTG
>OTU_2077	AAGTCGTAACAAGGTTTCCGTAGGTGAACCTGCGGAAGGATCATTCATAATAAGTGTTTTATGGCACTTTTTAAATCCATATCCACCTTGTGTGCAATGTCATCTCTCTGGGGGCTGCCAGCTGTCAAAAGCCGTGTGGTCACCTTTGGGATTTATATCTACTCAGAACTTTAGTGATTTTGTCTGAAACATATTATGAATACTTAATTCAAAATACAACTTTCAACAACGGATCTCTTGGCTCTC
>OTU_2079	AAGTCGTAACAAGGTCTCCGTTGGTGAACCAGCGGAGGGATCATTACAGAGTTGCAAAACTCCCAAACCATTGTGAACGTTACCTTCAAACCGTTGCTTCGGCGGGCGGCCCGGGTCCGCCCGGTGCCCCCTGGCCCCCTCGCGGGGCGCCCGCCGGAGGAAACCCAACTCTTGATACATTATGGCCTCTCTGAGTCTTCTGTACTGAATAAGTCAAAACTTTTAACAACGGATCTCTTGGCTCCA
>OTU_208	AAGTCGTAACAAGGTTTCCGTAGGTGAACCTGCGGAAGGATCATTAACACGTATCCAACGTTAACCCCCCTGTGAACCTTCAGTGTGCTCGTACGCTTTGTTAGAAAGTAGCAATCCCTGGTAAATCATCGCCAAACAGTTTTCGATTCAGGGATCTCTGCGAAGAGTGTGCATGTTGCGCGAGGTAAGTGGCCTGGCATCCCCAAGGAGTTATTGTCTGAAAGTGTCATTAACTGCGTAAGGATGGCGCAGTCACGATCGTTGGAGGCCGACACGGCCGACGACCGGGTCACCGGGCTCACGCCCCCTTATCACAAAACCCATGCATGAAGACGCGCCTGCGCTAAAACCGCGGCGACCAAAAACCGAACAACTGTTAACAATGGATATCTTGGTTCTC
>OTU_2080	AAGTCGTAACAAGGTCTCCGTTGGTGAACCAGCGGAGGGATCATTACAGAGTTGCAAAACTCCCAAACCATTGTGAACGTTACCTAAACCGTTGCTtcggcgggcggccccggggtttaccccccgggcgccccccggccctcgcgggcgcccgccggAGGTAAACCAAACTATTGCATTAATGGCCTCTCTGAGTCTTCTGTACTGAATAAGTCAAAACTTTCAACAACGGATCTCTTGGTTCTG
>OTU_2081	AAGTCGTAACAAGGTCTCCGTTGGTGAACCAGCGGAGGGATCATTACCGAGTTTTCAACTCCCAAACCCCTGTGAACATACCAATCGTTGCCTCGGCGGGAGAGCCCCGGGCGTTGGCGAAAGCCTCGCACCGGTATCAGGCGCCCGCCGGAGGACCCAAACAAACTCTTGAATTCTAAAGTATCTTCTGAGTAATATAAGTTAAATAAGCAATCAAAACTTTCAGCAACGGATCTCTTGGCTCTG
>OTU_2082	AAGTCGTAACAAGGTTTCCGTAGGTGAACCTGCGGAAGGATCATCAATGAATCTTATACCCTCTAAACACGCTCTGTGCAATTGTGACACTTGGTTGGTGGGGGGAAGGAGGAGAGCTTTGCTTTTCTTGCACCCCCCATCTTCCAACTTTCATAAACCCGCTTTTTTAACCCTTTATTCCCATGACTGAAAAAACACAAAACGAAAACCAAAAGACAACTTTTAACAACGGATCTCTTGGCTCTC
>OTU_2083	AAGTCGTAACAAGGTCTCCGTTGGTGAACCAGCGGAGGGATCATTACCGAGTTGCAAAACTCCCAAACCCATTGTGAACCAATACCACTGTTGCTTCGGCGGACACGCCCCGGGCGCACCTCCTCACGGGGGCGTGCCCCGGAACCAGGCGCCCGCCGGGGGACCGAAACCTCTGTATTTACCATTTGAGTACTCTGAGTGTGATTTACAAAATCAAAACTTTTAACAACGGATCTCTTGGCTCTG
>OTU_2085	AAGTCGTAACAAGGTCTCCGTTGGTGAACCAGCGGAGGGATCATTACAGAGTTCTAAAAAGACTCCCAAAACCATTGTGAACGTACCCGTCAGCGTTGCCTCGGCGGGCGGCCCCTCCCTGGGGCCGCTGCCCCCCCTTCGCGGGGGGTGCCCGCCGGCGTACCAAAACTCTTTTGTATTTTAGTGGCCTCTCTGAGAAAACAAGCAAATAAGTTAAAACTTTCAACAACGGATCTCTTGGTTCTG
>OTU_2086	AAGTCGTAACAAGGTTTCCGTAGGTGAACCTGCGGAAGGATCATTACCTTTCAATGCAGCAGAATTGCGATGGTTGAGTATCTCGCCTTTCGATTCTGCCTGTATTCTACCCTTGTTTCTCTTACACTATTATTTCCTCGGTAGGCTTGCCTGCCGGGTGAAACCATTTATAACCTATTTAATTTTCAATCAGCGTCTGAAAAAAATTAATAATTACAACTTTCAACAACGGATCTCTTGGTTCTG
>OTU_2087	AAGTCGTAACAAGGTTTCCGTAGGTGAACCTGCGGAAGGATCATTAGTGAATCTAGGACGTCCAACTTAACTTGGAGTCCGAACTCTCACTTTCTAACCCTGTGCATCTGTTTTAAAATTGGCCAGTAGCTCTTCGGAGCGAACCACCATTTTTCACTTATACAAAACTTATACAAACACAAAGTCTATGAATGTAAACAAATTTATAACAAAACAAAACTTTCAACAACGGATCTCTTGGCTCTC
>OTU_2088	AAGTCGTAACAAGGTCTCCGTTGGTGAACCAGCGGAGGGATCATTACAGAGTTGCAAAACTCCCTAAACCATTGTGAACGTTACCTAAACCGTTGCTTCGGCGGGCGGCCACGGGCTCACCCCCGCGGCCCCCGGCCCCCTCAAGGGCGCCCGCCGGAGGTAAACCAAACTATTGCATTGTATGGCCTCTCTGAGTCTTCTGTACTGAATAAGTCAAAACTTTCAACAACGGATCTCTTGGTTCTG
>OTU_209	AAGTCGTAACAAGGTTTCCGTAGGTGAACCTGCGGAAGGATCATTAACACGTATCCAACGTTAAAACCCCCTGTGAACCTTCAGTGTGCTCGTACACTTTGTTAGAAAGTAGCCTTTTCCTGGTAAATCATTGCCGAACAGTTTTGATTCAGGAGATATCTGCGAAGAGTGTGCTTGTAGCGCGAGGCAAGTGGCCTGGCATTCCTCTGCATAGTTGATGTCTGAAAGTGTCATTGGCTATGTACGGATGACGCAGTAACGATCACTAGAGGCCGACACGGCCGGTGACCGGGTCGCCGGGCTCACGCCCCTTAATAACCTTTGCATGAAAACGGGCCTGCGCTTAATTGTGCGGCCACCAAACTCGAACAACTGTTAACAATGGATATCTTGGTTCTC
>OTU_2090	AAGTCGTAACAAGGTCTCCGTTGGTGAACCAGCGGAGGGATCATTACTGAGTTATCCAAAACTCCCAACCCTTTGTGAACTTACCACTGTTGCCTCGGCGAGTTGTGCTACCCTATAGCTACCCTGTAGCTACCCGGGAACACATTCCAAGCTCGCCAGAGGACCTACCAACTCTGTTTTATACTGTATCTCTGAACTTTATAACTAAATAAGTTAAAACTTTCAACAACGGATCTCTTGGTTCTG
>OTU_2092	AAGTCGTAACAAGGTTTCCGTAGGTGAACCTGCGGAAGGATCATTCATAATCAAGTGTTTTTATGGCACTTTAAAAATCCATATCCACCTTGTGTGCAATGTCATCTCACTTGGGTCACGGCTGTAAAACGCCGGCGGCCCGTTTGGGATTTATATCTACTCAGAATTTTAATCATTTTGTCTGAAACATATTATGAATAAAAACAATTCAAAATACAACTTTCAACAACGGATCTCTTGGCTCTC
>OTU_2096	AAGTCGTAACAAGGTTTCCGTAGGTGAACCTGCGGAAGGATCATTACCCTTCAATGCAGCAGAATTGGGATGGTTGAGTTTCTCGCCTCTCCATTCTGCCTGTATTCTACCCTTGTTTGCCATATACTATTATTTCCTCGGCAGGCTTGCTTGCCGAGTGAAACCAATTATAACCTATTTAATTTTCAATCAGCGTCTGGAAAAAATTAATAATTACAACTTTCAACAACGGATCTCTTGGTTCTG
>OTU_2097	AAGTCGTAACAAGGTCTCCGTTGGTGAACCAGCGGAGGGATCATTACAGAGTTGCAAAACTCCCTAAACCATTGTGAACGTTACCTTCAAACCGTTGCTTcggcgggcggcccgggtccccccgggcgcccctgggccccaccgcgggcgcccgccggAGGAAACCCAACTCTTGATTATTATGGCCTCTCTGAGTCTTCTGTACTGAATAAGTCAAAACTTTCAACAACGGATCTCTTGGTTCTG
>OTU_2098	AAGTCGTAACAAGGTCTCCGTTGGTGAACCAGCGGAGGGATCATTACAGAGTTGCAAAACTCCCAACCATTGTGAACCTACCTCACCGTTGCTTCGGCGGGTGGCCCGCTAACCCGGTGCCGCGCTGGCTCCCCCTTCGGGGGGCCCGGCAACCCGTCAGAAGACCGAAACTCTTCGTCATCAGTGGCCTCTCTGAGTAACTTATACAATAAGTCAAAACTTTCAACAACGGATCTCTTGGTTCTG
>OTU_2099	AAGTCGTAACAAGGTTTCCGTAGGTGAACCTGCGGAAGGATCATTATTGAGTACCTGGAATGGCCCCTCGGGGCTGTTCTGCTCACTCTTCTCTTCTTTGTTATTTTTTCATAGTTGCTTTGGCAGTCAGTCATGGCTGTCAAGGGACCTTTAACTACTTTATGTTTGCTAATAGTTGCGTTTGTCTTGTCTGAATTAAATACTTAATTGTAACTAAAACTTTTAACAATGGATCTCTTGGTTCTG
>OTU_21	AAGTCGTAACAAGGTTTCCGTAGGTGAACCTGCGGAAGGATCATTAGTGAACGCCCTTCATGGGCTTAAACTATTCCAAACCTCTGTGAACCGTGCCCTTCGGGGCTAATTTTACAAACATGGTGTAATGAACGTCATAACTTTAACAAAACAAAACTTTCAACAACGGATCTCTTGGCTCTCGCATCGATGAAGAACGCAAACAACGGCTAAGCCTCTTGGTCATTTAGAGGAAGTAAAAGTCGTAACAAGGTTTCCGTAGGTGAACCTGCGGAAGGATCATTACCTAGAGTTTGTAGACTTCGGTCTGCTACCTCTTACCCATGTCTTTTGAGTACCTTCGTTTCCTCGGCGGGTCCGCCCGCCGATTGGACAACATTCAAACCCTTTGCAGTTGCA…
>OTU_210	AAGTCGTAACAAGGTTTCCGTAGGTGAACCTGCGGAAGGATCATTATCGAGAGGGGCTTCGCTTGGGTCTTGCAGAAACATGCAAGTCCGGGGAGCCAAAATCTACCTCAACCCCACCCCTTGTGAACTCTGGTTGCCAGTGCGTGCTGCCGCTGGCGGGACAGCTTGGAACGTAAAAGTGTCTCTGTTGGCAGCAGCTAAACCATTGAGCAGTCAGTCCtttttttttCTTTCAACCTTCTTGTTTGCAATATCTATTTCAATCTAAAAGTGCAAACGTGACTCTGGATGTGTTCTATTTTGAGCACAGAGCTCTTGATCTCGGCTCAAAAGCGAACCATTGGAGAGGCACACTCAATGCATTAAGGATAACTTTCAGCAACGGATCTCTTGGCTCTC
>OTU_2100	AAGTCGTAACAAGGTCTCCGTTGGTGAACCAGCGGAGGGATCATTACAGAGTTGAAAAACTCCCCTAAACCATTGTGAACCTACCACTAAACAGTTGCTTCGGCGGGTGGGCGCCCCTCCCCAGGGAAAGGCGCCCCGCTAGACCGCCCGCCGGAGGTACCCAAAACTCTTGTTTAACTAAAAGGCCTCTCTGAGTCTTCTGTACTGAATAAGTCAAAACTTTCAACAACGGATCTCTTGGTTCTG
>OTU_2101	AAGTCGTAACAAGGTCTCCGTAGGTGAACCTGCGGAGGGATCATTACACAAATATGAAGGCGGGCTGGCACCTCCCGGGGTGGCCAGCCTTGCTGAATTATTCCACCCGTGTCTTTTGCGTACTTCTTGTTTCCTTGGTGGGCTCGCCCACCACAAGGACCAACCCATAAACCTTTTTGTAATAGCAATCAGCGTCAGTAACAATGTAATAATTTACAACTTTCAACAACGGATCTCTTGGTTCTG
>OTU_2102	AAGTCGTAACAAGGTCTCCGTTGGTGAACCAGCGGAGGGATCATTAAAGAGTTGCAAAACTCCCTAAACCATTGTGAACATACCTTCAACGTTGCTTCGGCGGGTTGGCTCCGGGTCCGCCCGGTGCCCCCTGGCCCCCTTGCGGGGCGCCCGCCGGAGGAAAACCCAACTCTTGATTATTATGGCCTCTCTGAGTCTTCTGTACTGAATAAGTCAAAACTTTCAACAACGGATCTCTTGGTTCTG
>OTU_2103	AAGTCGTAACAAGGTCTCCGTTGGTGAACCAGCGGAGGGATCATTACAGAGTTGCAAAACTCCCTAAACCATTGTGAACGTTACCTAAACCGTTGCTtcggcgggcggcccgggtccttcccggcgcccccccggccccctagcggggcgcccgccggAGGAAACCCAACTCTTGATTATTATGGCCTCTCTGAGTCTTCTGTACTGAATAAGTCAAAACTTTCAACAACGGATCTCTTGGTTCTG
>OTU_2104	AAGTCGTAACAAGGTCTCCGTTGGTGAACCAGCGGAGGGATCATTACAGAGTTGCAAAACTCCCTAAACCATTGTGAACGTTACCTTCAAACCGTTGCttcggcgggcggcccgggtccttcccggcgcccccccggccctcgcgggcgcccgccggAGGTAAACCAAACTCTTGATTATTATGGCCTCTCTGAGTCTTCTGTACTGAATAAGTCAAAACTTTCAACAACGGATCTCTTGGTTCTG
>OTU_2105	AAGTCGTAACAAGGTCTCCGTTGGTGAACCAGCGGAGGGATCATTACAGAGTTGCAAAACTCCCTAAACCATTGTGAACGTTACCTAAACCGTTGCTTCGGCGGGCGGCCCGGGTCCTTCCCGGCGCCCCCCTGGCCCCCTAGCGGGGCGCCCGCCGGAGGAAACCCAACTCTTGATTATTATGGCCTCTCTGAGTCTTCTGTACTGAATAAGTCAAAACTTTCAACAACGGATCTCTTGGTTCTG
>OTU_2106	AAGTCGTAACAAGGTTTCCGTAGGTGAACCTGCGGAAGGATCATTAATGAATTAAACGGAGTTGTTGCTGGCCGCAAGGTATTCGTGCACGCTCCTCATTCATCTCACACCTGTGCACCTGTCGTAGGCTGAGCGATCAGCTTATGTATATCTATCACACCCTGTAAAAACGTCTTACGAATGTATACGAGACGCTCGCGTCTTTTAAAACTAATACAACTTTCAACAACGGATCTCTTGGCTCTC
>OTU_2109	AAGTCGTAACAAGGTCTCCGTAGGTGAACCTGCGGAGGGATCATTAACGAAATCGCACACAAGATGGGAGATGCAAGTAGTGGTTGTTTGATAGTGACATAACTAAACTATTAGTGACATTACTAAACTATTAGTGACATAACTTGATTACTTTACTATTGACTCTCTTATTCTTAAAAATTAACGATATACAATTGACAAAATAGACAATGAGAAACACTTTTAACAATGGATCTCTTGGCTCTT
>OTU_211	AAGTCGTAACAAGGTTTCCGTAGGTGAACCTGCGGAAGGATCATTAACAACGTATCCTAAACGTAAAAAACCCCCCCTGTGAACTTTCATAACCCGAGCTTGCTAGGCCCGCGAAATTCAGCAATCCCTGGTAAATCATTGTTGACCAGCTCTTTGAGTCAGGGATATCCGAACTAGTCGTGTGGATTAAGTTCCGTGAAGCAAGAGCGGTGCAATCAATGTTCTGTCAGTGTCGTTGATTGTGTAAGGGTGGCGCAGTAAACGATCGCTGGAGGCCACCACGGCCGGCGACTGGGTCAGCGAGCTCTGCTCCTTAATAACCCCACCTAAGGATTAGCTCGGCGAAAGCTTGAGCACCAAAAACTAATACGACTGTTAACAATGGATATCTTGGTTCTC
>OTU_2110	AAGTCGTAACAAGGTCTCCGTTGGTGAACCAGCGGAGGGATCATTACAGAGTTGCAAAACTCCCTAAACCATTGTGAACGTTACCTTCAAACCGTTGCTTCGGCGGGCGGCCCGGGTCCTTCCCGGCGCCCCCCGGCCCTACTCGGGCGCCCGCCGGAGGTCACCAAACTCTTGATAATTTATGGCCTCTCTGAGTCTTCTGTACTGAATAAGTCAAAACTTTCAACAACGGATCTCTTGGTTCTG
>OTU_2112	AAGTCGTAACAAGGTTTCCGTAGGTGAACCTGCGGAAGGATCATTACCTTTCAATGCAGCAGAATCGGGATGGTTGAGTATCTCGCCTCTCAGTTCTGCCTGTATTCTACCCTTGTTTCTCTTACACTATTATTTCCTCGGCAGGCTTGCCTGCCGAGTGAAACCACTTATAACCTATTTAATTTTCAATCAGCGTCTGAACAAAATTAATAATTACAACTTTCAACAACGGATCTCTTGGTTCTG
>OTU_2113	AAGTCGTAACAAGGTTTCCGTAGGTGAACCTGCGGAAGGATCATTAACACTAATGAAATCCAAAACCTTTTGGATCAACCCAACCTTAGCGAACCGTTCGTATTTTCCCTTTGCCATTCTAATTTATCAAACGCAAAACAATCTGAAGTAAAGTGTCTGATTCTTATTCCCGTGCTTTCTCATTCGAGGGGCCTGGAATCAAAATCTAACGCAATACAACTCTTAACAACGGATATCTTGGCTCTC
>OTU_2114	AAGTCGTAACAAGGTTTCCGTAGGTGAACCTGCGGAAGGATCATTATTATTTATGTAGGTGTTTGTCACTCATGACTGTTGCTCTTTGTGTCTTGAATTTAAGTGATAAATGCTTACCTGAATAAAAATCCTATTCCAAATAGGAGCGAGATAAACTTATATTTAAAACCCACTCTTGAATGTATAAAATCTATGTATTAATGATAAAATTAAAGATCACTTTCAACAACGGATCTCTTGGCTCTC
>OTU_2115	AAGTCGTAACAAGGTCTCCGTTGGTGAACCAGCGGAGGGATCATTACAGAGTTGCAAAACTCCCAAACCATTGTGAACGTTACCTTCAAACCGTTGCttcggcgggcgggccggccccagggccgcgccccccaggcccctcgcggggcgcccgccggAGGAAACCAAACTCTTGATTATTATGGCCTCTCTGAGTCTTCTGTACTGAATAAGTCAAAACTTTCAACAACGGATCTCTTGGTTCTG
>OTU_2116	AAGTCGTAACAAGGTTTCCGTAGGTGAACCTGCGGAAGGATCATTAACACTTACCTGCTTTATACTAGCAATAGTATAAAACATGTATAACACAAACCCGTGCTCCCTTTTTTCCACACCATTAACCCTTTTCTAATTATTGTTATATCTATAACGATCTACAAGATTCAATTCTTGTTGGGTTGCTATATTCATAGTCTAATCTATGTCTAAACACAACTCTTAACAATGGATATCTTGGCTCTC
>OTU_2117	AAGTCGTAACAAGGTCTCCGTAGGTGAACCTGCGGAGGGATCATTACAGAGTTCATGCCCTAGCGGGTAGATCTCCCACCCACTGTTATTGTTACTGTCGTTGCTTTGGCGGGCCGCTCGGCACCTGCCCGGCTACCGGCTTCCCGCTGGTAAGCGCCCGCCAGAGGACCCCAAACTCTGAATTGTTAGTGTCGTCTGAGTACTATGTAATAGTTAAAACTTTCAACAACGGATCTCTTGGTTCTG
>OTU_2118	AAGTCGTAACAAGGTCTCCGTTGGTGAACCAGCGGAGGGATCATTACAGAGTTGCAAAACTCCCAACCATTGTGAACCTACCTCACCGTTGCTTCGGCGGGTGGCCCGCTAACGCGGCGCCGCGCCGGCGTCCCCTTCGGGGGGCCCGGCAACCCGTCAGAAGACCGAAACTCTTAGTCATCTTGGCCTCTCTGAGTAACTTATACAATAAGTCAAAACTTTCAACAACGGATCTCTTGGTTCTG
>OTU_2119	AAGTCGTAACAAGGTCTCCGTTGGTGAACCAGCGGAGGGATCATTACCGAGTTTTCAACTCCCAAACCCCATGTGAACTTATACCATTTACAACCGTTGCTTCGGCGGGTTCTCGCCCCGGGCTTTACACCCCGGAACCAGGCGGCCCGCCGGGGGACCCAAACTCTAGATTTATATTTTAGCATGTCTGAGTGGAATCATTACAAAATGAATCAAAACTTTCAACAACGGATCTCTTGGTTCTG
>OTU_212	AAGTCGTAACAAGGTTTCCGTAGGTGAACCTGCGGAAGGATCATCACTGACCATCCGGGGATGGGTGATGTGTGGGTGGTGGGTGTGCGCGCGCGCGCTTGCGCGTTCCACCGCTCCACGTCCCGCCCCAACCAATCTTGTGTGCACCGTTTTTTTCTCACCGATCAAGGAAAACAATGCGCGTGTGACGTGCGGTGCGTGTTGGCGAGAGAGGGGGGAGCACACAGCGGCAACCCCCTATTTTACTTTACTCTCTTGCCAATCGCATGCGCCTTGTCGCGCGTGTGTGTTGTGTTTTCTCTTGTCTCTACACACACAATCTCTTGATGAAATCTTGTCTAACACTAACACTAGCTAAATTTATTATACAACTTTTAACAATGGATCTCTTGGCTCTC
>OTU_2120	AAGTCGTAACAAGGTCTCCGTTGGTGAACCAGCGGAGGGATCATTACCGAGTTTACAACTCCCAAACCCTTATGTGAACCGTACCTATCGTTGCTTCGGCGGGAACGCCCCGGCGCCCTGAGCCCGGAACCCGGCGCCCGCCGGAGACCACAAACCCTTCTGTATTTTCAGCACTAGTATTTTTCCTCTGAGTGGCAAACGCAAAAAATCAATCAAAACTTTTAACAACGGATCTCTTGGCTCTG
>OTU_2121	AAGTCGTAACAAGGTCTCCGTTGGTGAACCAGCGGAGGGATCATTACTGAAGGTCTCCGTGCCTGAAAACCATTGTGAACCCTTCTCCTTAGCTGCCTCGGCGGGCAATCCCAGGGCGGGATTCCGGGGCCCCCTTCTGGGGGGCCGTCCGCCGGCGGTGCACCCTTCTAGCTCTGTCTGTGGCGGGCTTCTGAGTGTGATTGAAAAACAAGTCAAAACTTTCAACAACGGATCTCTTGGCTCTG
>OTU_2122	AAGTCGTAACAAGGTCTCCGTTGGTGAACCAGCGGAGGGATCATTACAGAGTTGCAAAACTCCCAACCATTGTGAACCTACCTCACCGTTGCTTCGGCGGGTGGCCCGGGGCAACCCGCGCCGCGCCGGCCCCTCTAGAGGGGTCCGGCAAACCCGTCAGAAGACCGAAACTCTGAACCATTTAGGCCTCTCTGAGTAACTTATACAATAAGTCAAAACTTTCAACAACGGATCTCTTGGTTCTG
>OTU_2123	AAGTCGTAACAAGGTTTCCGTAGGTGAACCTGCGGAAGGATCATTACAGTATATTGAATTCACATTCATATACCCACTCTGCGTACCTTATAACTGTTGCTTCCATGGGACTTGGCTCTGCCACGTCGGCCTCCGGGCTGGTGAGCTCCCATGGGAGGAAAACAATACTCCTTTTTGTCAGTGAAGTCTGTATGAATAGTTTATAATAAACGTTAAAACTTTCAACAACGGATCTCTTGGTTCTC
>OTU_2124	AAGTCGTAACAAGGTCTCCGTTGGTGAACCAGCGGAGGGATCATTACAGAGTTGCAAAACTCCCAACCATTGTGAACCTACCTCACCGTTGCTTCGGCGGGTGGCCCGCTAACCACGGGCCGGGTCAGCTCCTGTCTTAGGGGCCTGGCAACCCGTCAGAGGCCTGAAACTCTTCGTCATCAGTGGCCTCTCTGAGTAACTTATACAATAAGTCAAAACTTTCAACAACGGATCTCTTGGTTCTG
>OTU_2125	AAGTCGTAACAAGGTCTCCGTTGGTGAACCAGCGGAGGGATCATTACAGAGTTCTAAAAGACTCCCAAACCATTGTGAACGTTACCCGTAACATGTTGCCTCGGCGGGCGGCCCCTCCCTGGGGCCGCTGCCTCCCTCCGGGGAGGTGCCCGCCGGAGCGCCAAAAACTATTTTGTATTCTAGTGGCCTCTCTGAGAAAACAAGCAAATAAGTTAAAACTTTCAACAACGGATCTCTTGGTTCTG
>OTU_2126	AAGTCGTAACAAGGTCTCCGTTGGTGAACCAGCGGAGGGATCATTACAGAGTTGAAAAACTCCCAACCATTGTGAACCTACCTCACCGTTGCTTCGGCGGGTGGCCCCCTGACCCGGGGGCCGCGCCGGCCTCCTCCCCCGGAGCCGGCAACCCGTCAGAGGCCCGCAACTCTTCGTCATCATTGGCCTCTCTGAGTAACTTATACAATAAGTCAAAACTTTCAACAACGGATCTCTTGGTTCTG
>OTU_2127	AAGTCGTAACAAGGTCTCCGTTGGTGAACCAGCGGAGGGATCATTAAAGAGTTGCAAAACTCCCTAAACCATTGTGAACATACCTTCAACGTTGCTTCGGCGGGTTGGCTCCGGGTCTCCCGGGGCCCCCGGCCCTACTCGGGCGCCCGCCGGAGGTATCTAACTAACTCTTGATAATTTATGGCCTCTCTGAGTCTTCTGTACTGAATAAGTCAAAACTTTCAACAACGGATCTCTTGGTTCTG
>OTU_2128	AAGTCGTAACAAGGTCTCCGTTGGTGAACCAGCGGAGGGATCATTACAGAGTTACTTAACTCCCAAACCATTGTGAACGTTACCTCTACCGTTGCTtcggcgggcgggccggcctcagggccgcgcccccccggccccctcgcggggcgcccgccgGAGGAAAACCAACTCTTGATTATCATGGCCTCTCTGAGTCTTCTGTACTGAATAAGTCAAAACTTTCAACAACGGATCTCTTGGTTCTG
>OTU_2129	AAGTCGTAACAAGGTTTCCGTAGGTGAACCTGCGGAAGGATCATTAACACTAATGAAATCCAAAACCTTTTGGATCAACCCAACCTTAGCGAACCGATCGTTTTTTTCCTTGCCCCTTTCTATTAAACCCAAAAAACCTCTGATGTAAAGTGTCTGATTCTTTATTCTTGTGCCCCATCATACGATGCGGTCAGGAATCAAAATCTAACGCAATACAACTCTTAACAACGGATATCTTGGCTCTC
>OTU_213	AAGTCGTAACAAGGTTTCCGTAGGTGAACCTGCGGAAGGATCATTAATACGCTTTTGTTTGTAACAAAACAAAACGTTTTAAACCCCCAAAATTGAAATAGTGGAAACATAACTTCCGGATGCGAATGTTGGAGAACTGAGTAAAATCAGTTCTTTGAAAAAGGGACTTCAAGCAATTGACACTTCAGAGTAGAGCAGTGAGGTGAAACTCGAAAGAGTTTGGTTCTGAAAAACATTTGTATCCGGTTATCACATCTGTTCTACCAAAATATCAAACAATAAACCCCATGTACAACAACTTGAACTAAACATTTTTTTGTTTGTCTGCTTCGCAGCAGATGTGCAAAGAAAAAACCTGAACTTAAGAACAACTCTTAACAACGGATATCTTGGTTCTC
>OTU_2130	AAGTCGTAACAAGGTTTCCGTAGGTGAACCTGCGGAAGGATCATTATCGATTCAAGAGGATGTGCTGGCTCATTCTGTTGGAAGAGCATTGTGCACTCTCTCAAATCTCACTCTATTCACCTGTGCACATTTGGTAGGCATGAGGAAACTCATTGTCTATTGCTTCATTTCATACACACCTTATGAATTTAATTGAACAAACTTGATAAATGTAACAACTTTCAACAATGGATCTCTTGGTTCTC
>OTU_2131	AAGTCGTAACAAGGTCTCCGTTGGTGAACCAGCGGAGGGATCATTACAGAGTTGCAAAACTCCCAACCATTGTGAACCTACCTCACCGTTGCTTCGGCGGGTGGCCCGCTAACCCGGAGCCGCGTCGGACCCTCCTTCGGGGGGGCCGGCAACCCGTCAGAGGACCGAAACTCTTAGTCATCTTGGCCTCTCTGAGTAACTTATACAATAAGTCAAAACTTTCAACAACGGATCTCTTGGTTCTG
>OTU_2132	AAGTCGTAACAAGGTCTCCGTTGGTGAACCAGCGGAGGGATCATTACCGAGTTGCAAAACTCCCAAACCCATTGTCTACCTATCTCGCAAAAGAGCCCTGCCTCGGCGGGCGGCCCCGGGGAGGGGCCGCAGGCCGGCGCGCGAGCGCTGGCGCCCGCCGAGCGGGCCCAAATTCGTATTTTTAGTGTCTCTCTGAGCCTAAAGACAAATAGTCAAAACTTTCAACAACGGATCTCTTGGTTCTG
>OTU_2133	AAGTCGTAACAAGGTCTCCGTTGGTGAACCAGCGGAGGGATCATTACAGAGTTGCAAAACTCCCAACCATTGTGAACCTACCTCACCGTTGCTTCGGCGGGTGGCCCGCTAACCCGGCGCCGCGCCGGCCCACCTTCGGGCGGTGCCGGCAACCCGTCAGAAGACCGAAACTCTTTGTCATCTTGGCCTCTCTGAGTAACTTATACAATAAGTCAAAACTTTCAACAACGGATCTCTTGGTTCTG
>OTU_2134	AAGTCGTAACAAGGTCTCCGTAGGTGAACCTGCGGAGGGATCATTACACAATAAAATATGAAGGCCTGGCTTCGCGGCCGGCTGAAGTATTTTTTCACCCATGTCTTTTGCGCACTTGTTGTTTCCTGGGCGGGTTCGCCCGCCACCAGGACCAAACCATAAACCTTTTTCTTATGCAGTTTCCATCAGCGTCAGTAAAAACAATGTAATTATTACAACTTTCAACAACGGATCTCTTGGTTCTG
>OTU_2135	AAGTCGTAACAAGGTTTCCGTAGGTGAACCTGCGGAAGGATCATTACCTTTCAATGCAGCAGAATTGGGATGGTTGAGTTTCTCGCCTCTCTTTTCTGCCTGTATTCTACCCTTGTTTGTCATATACTATTATTTCCTCGGCAGGCTCGCCTGCCGGGTGAAACAACTTCAAACCTGTTTAATTTTCAATCAGCGTCTGAACAAATTAATAATTACAACTTTCAACAACGGATCTCTTGGTTCTG
>OTU_2136	AAGTCGTAACAAGGTCTCCGTTGGTGAACCAGCGGAGGGATCATTACAGAGTTGCAAAACTCCCAACCATTGTGAACCTACCTCACCGTTGCTTCGGCGGGTGGCCCCCTCCACGGGGAGCCGCGCCGGCTCCCTCACCCGGGGCTGGCAACCCGTCAGAGGCCTGAAACTCTTAGTTATCATTGGCCTCTCTGAGTAACTTATACAATAAGTCAAAACTTTCAACAACGGATCTCTTGGTTCTG
>OTU_2137	AAGTCGTAACAAGGTTTCCGTAGGTGAACCTGCGGAAGGATCATTAACAAATCATTTGTGTTCGGTGGTGTAAAAGCCGCTGATACATTAGCGCTCTGCCGCAAGGGAGTTCTCTTCCTTGGGCATTGTGTATGTCATGATGTGCGCAAGTACAGATTGGCAAAATAGACGCTTGTATTGTTTGACTGATTACGAGAGAAAACTAAATTAAAAGACAACTTTTAACAATGGATCTCTTGGCTCTT
>OTU_2138	AAGTCGTAACAAGGTTTCCGTAGGTGAACCTGCGGAAGGATCATTACCTTTCCATGCAGAAGGTTTGCGCAGGGCTTTGTGCCCTCGCAAGTCTTCCTGTATACCACCCTTGTCTTTTGCGCACTCATGTTTCCTCGGCAGGCTTGCCTGCCGGTTGGACAAAACTTATAACCTTTTTAATTTTCAATCAGCGTCTGAAATAATTTTAATAATTACAACTTTCAACAACGGATCTCTTGGTTCTG
>OTU_2139	AAGTCGTAACAAGGTTTCCGTAGGTGAACCTGCGGAAGGATCATTACCTTTCAATGCAGAAGAGTTGAGGTGGTTGAGTATCTCGCCCCTCAATTCTCGCTGTATTTTACCCTTGTTTTTCTCGTACTATTATTTCCTCGGCAGGCCAGCCTGCCGGGTGAAACATCTTCAAACCTGTTTAATTTTCAATCAGCGTCTGAACAAATTAATAATTACAACTTTCAACAACGGATCTCTTGGTTCCG
>OTU_214	AAGTCGTAACAAGGTTTCCGTAGGTGAACCTGCGGAAGGATCATTAACAACGTATCCTAAACGTAAAAAACCCCCCCTGTGAACCTTCATAACCCGAGCTTGCTAGGCCCGCGAAATTCAGCAATCCCTGGTAAATCATTGTTGACCAGCTCTTTGAGTCAGGGATCTCCGAACTAGTCGTGTGGAGGCAAGTGACCCGGTACCCCCAAGCAATCAATGTTCTGTCAGTGTCGTTGATTGTGTAAGGGTGGCGCAGTAAACGATCGCTGGAGGCCACCACGGCCGGCGACTGGGTCAGCGAGCTCTGCTCCTTAATAACCCCACCTAAGGATTAGCTCGGCGAAAGCTTGAGCACCAAAAACTAATACGACTGTTAACAATGGATATCTTGGTTCTC
>OTU_2140	AAGTCGTAACAAGGTCTCCGTTGGTGAACCAGCGGAGGGATCATTACAGAGTTGCAAAACTCCCTAAACCATTGTGAACGTTACCTAAACCGTTGCTTCGGCGGGCGGCCCGGGTCCTTCCCGGCGCCCCTCGGCCCCTCACCGGGCGCCCGCCGGAGGTACCTAACCCTTTACGCATGTATGGCCTCTCTGAGTCTTCTGTACTGAATAAGTCAAAACTTTCAACAACGGATCTCTTGGTTCTG
>OTU_2141	AAGTCGTAACAAGGTCTCCGTTGGTGAACCAGCGGAGGGATCATTACAGAGTTGCAAAACTCCCAACCATTGTGAACCTACCTCTCGTTGCTTCGGCGGGTGGCGCCCCCTCACCGGGGGCGCCGCGCCGGCCCCACACGGGGCCTGGCAACCCGTCAGAGGCCCGCAACTCTTGATCATCATTGGCCTCTCTGAGTAACTTATACAATAAGTCAAAACTTTCAACAACGGATCTCTTGGTTCTG
>OTU_2142	AAGTCGTAACAAGGTCTCCGTTGGTGAACCAGCGGAGGGATCATTACAGAGTTGCAAAACTCCCTAAACCATTGTGAACGTTACCTTCAAACCGTTGCTTcggcgggcggccgcgggctcacccccgcggcccccgggccccctccagggcgcccgccggAGGCTCCAACTCTTGAATTTATGGCCTCTCTGAGTCTTCTGTACTGAATAAGTCAAAACTTTCAACAACGGATCTCTTGGTTCTG
>OTU_2144	AAGTCGTAACAAGGTCTCCGTTGGTGAACCAGCGGAGGGATCATTACAGAGTTGCAAAACTCCCTAAACCATTGTGAACGTTACCTCCAACCGTTGCTTCGGCGGGCGGCACCGGGTccccccccGGTGCCCCTCGGCCCTCGCGGGCGCCCGCCGGAGGAAACCCAACTCTTGATTATTATGGCCTCTCTGAGTCTTCTGTACTGAATAAGTCAAAACTTTCAACAACGGATCTCTTGGTTCTG
>OTU_2145	AAGTCGTAACAAGGTCTCCGTTGGTGAACCAGCGGAGGGATCATTACAGAGTTGAAAAACTCCCCTAAACCATTGTGAACCTACCACTAAACCGTTGCTTCGGCGGGCGGCCCGGGTCCTTCCCGGCGCCCCTCGGCCCTCGCGGGCGCCCGCCGGAGGTAAACCAAACTATTGCATTGTATGGCCTCTCTGAGTCTTCTGTACTGAATAAGTCAAAACTTTCAACAACGGATCTCTTGGTTCTG
>OTU_2146	AAGTCGTAACAAGGTCTCCGTTGGTGAACCAGCGGAGGGATCATTACTGAAGGTCTATGTACCTGAAAACCATTGTGAACTCTCCCCTTTAGCTGCCTCGGCGGGCAATCCCAGGGCGGGATTCCCGGGCCCCTTGCGGGGCCGTCCGCCGGCGGTGCAACCTCTCTAGCTCTGTCTGTGGCGGGCTTCTGAGTGGACGGAAGAAAAACAAGTCAAAACTTTCAACAACGGATCTCTTGGCTCTG
>OTU_2147	AAGTCGTAACAAGGTCTCCGTTGGTGAACCAGCGGAGGGATCATTACAGAGTTGCAAAACTCCCAACCATTGTGAACCTACCTCACCGTTGCTTCGGCGGGTGGCCCGGGGCGACCCAGGCCGCGCCGGCTCCCCTTGGGGGCCTGGCAAACCCGTCAGAGGATCGAAACTCTTCGTCATTATAGGCCTCTCTGAGTAACTTATACAATAAGTCAAAACTTTCAACAACGGATCTCTTGGTTCTG
>OTU_2148	AAGTCGTAACAAGGTTTCCGTAGGTGAACCTGCGGAAGGATCATTATTGATTTGAATCGTTGCCTTCTGTGCTGGCTTCGGCAAGTGCACGCTGGTGACTTTCATCCAACACCCTTGTGAACCTTTGGCCTCTTAACTAGCTTCGGCTGGGAGAGGATTTTACACACAAACTCGAATGTAATGAAAAACTCTGGTTGTGCGCAAGCACTAATATACAACTTTCAACAACGGATCTCTTGGCTCTC
>OTU_2149	AAGTCGTAACAAGGTCTCCGTTGGTGAACCAGCGGAGGGATCATTACAGAGTTCTAAAAAGACTCCCAAACCATTGTGAACGTTACCCGTAACCGTTGCCTCGGCGGGCGGCCCCTTCCCGGGGCCGCTGCCTCCCCTCGGGGGGGTGCCCGCCGGCGCACCAAAAACTATTCTGTATTTTAGTGGCCTCTCTGAGAAAACAAGCAAATAAGTTAAAACTTTCAACAACGGATCTCTTGGTTCTG
>OTU_215	AAGTCGTAACAAGGTTTCCGTAGGTGAACCTGCGGAAGGATCATTAACAACGTATCCTAAACGTAAAAAACCCCCCCTGTGAACTTTCATAACCCGAGCTTGCTAGGCCCGCGAAATTCAGCAATCCCTGGTAAATCATTGTTGACCAGCTCTTTGAGTCAGGGATATCCGAACTAGTCGTGTAGAGGCAAGTGACCCGGTACCCCCAAGCAATCAATGTTCTGTCAGTGTCGTTGATTGTGTAAGGGTGGCGCAGTAAACGATCGCTGGAGGCCACCACGGCCGGCGACTGGGTCAGCGAGCTCTGCTCCTTAATAACCCCACCTAAGGATTAGCTCGGCGAAAGCTTGAGCACCAAAAACTAATACGACTGTTAACAATGGATATCTTGGTTCTC
>OTU_2150	AAGTCGTAACAAGGTTTCCGTAGGTGAACCTGCGGAAGGATCATTACAGAGATCATGCCCTTCGGGGTAGACCTCCCACCCTATGTTTACATTACCTTTGTTGCTTTGGCGGGCCGTTCAGCCCTGTGCTGAACTACCGGCTTATGCTGGTAAGCGCCTGCCAGAGGACCCCAACCTCTGAATGTTATTGTCGTCTGAGTACTATATAATAGTTAAAACTTTCAACAACGGATCTCTTGGTTCTG
>OTU_2151	AAGTCGTAACAAGGTCTCCGTTGGTGGACCAGCGGAGGGATCATTATAGGAAGCCGAAAGGCTACTTGAAACCATCGCGAACCCATCCGTAGGCGTTGCTTCGGCGGGCGGCCCCAGCCCGGGGCCGCAGCCCCCCTTCTCCGGGGGGCGCCCGCCGGAGGCACTGAAACTCTCCTGTATCCTAGTGGCATCTCTGAGAATAAGCAAACAAGTTAAAACTTTCAACAACGGATCTCTTGGCTCTG
>OTU_2152	AAGTCGTAACAAGGTAACCGTAGGTGAACCTGCGGTTGGATCATTACAGAGTTGCAAAACTCCCAAACCATTGTGAACGTTACCTTCAAACCGTTGCTTCGGCGGGAGGCCCGGGTCCGCCCGGTGCCCCCTGGCCCCCTAGCGGGGCGCCCGCCGGAGGAAACCCAACTCTTGATTATTATGGCCTCTCTGAGTCTTCTGTACTGAATAAGTCAAAACTTTCAACAACGGATCTCTTGGTTCTG
>OTU_2153	AAGTCGTAACAAGGTCTCCGTTGGTGAACCAGCGGAGGGATCATTACAGAGTTGCAAAACTCCCTAAACCATTGTGAACGTTACCTTCAAACCGTTGCTTCGGCGGGCGGCCCGGGTCCGCCCGGTGCCCCCTGGCCCCCTAGCGGGGCGCCCGCCGGAGGAAACCCAACTCTTGATTATTATGGCCTCTCTGAGTAAAACAAACAAATAAATCAAAACTTTCAACAACGGATCTCTTGGTTCTG
>OTU_2155	AAGTCGTAACAAGGTCTCCGTTGGTGAACCAGCGGAGGGATCATTACCTTTCAATGCAGCAGAATTGGGATGGTTGAGTATCTCGCCTTTCAGTTCTGCCTGTATTCTACCCTTGTTTGTCATATACTATTATTTCCTCGGCAGGCTTGCCTGCCGAGTGAAACCATTTATAACCTTTTTAATTTTCAATCAGCGTCTGAAAAATTTAATAATTACAACTTTCAACAACGGATCTCTTGGTTCTG
>OTU_2156	AAGTCGTAACAAGGTTTCCGTAGGTGAACCTGCGGAAGGATCATTACCTTTCAATGCAGAAGAGTTGAGATGGTTGAGTATCTCGCCCCTCAATTCTCGCTGTATTTTACCCTTGTTTTTCTCATACTATTATTTCCTCGGCAGGCTCGCCTGCCGGGTGAAACAACTTCAAACCTGTTTAATTTTCAATCAGCGTCTGAACAAATTAATAATTACAACTCTTAGCAATGGATATCTTGGTTCTC
>OTU_2157	AAGTCGTAACAAGGTCTCCGTTGGTGAACCAGCGGAGGGATCATTAAAGAGTTGCAAAACTCCCTAAACCATTGTGAACATACCTTCAACGTTGCTTCGGCGGGTTGGCTCCGGGTCTCCCGGGGCCCCTGGGCCCCCCAGCGGGGCGCCCGCCGGAGGTCACCTAACTCTTGACAATTGTATGGCCTCTCTGAGTCTTTGTACTTAATAAGTCAAAACTTTCAACAACGGATCTCTTGGTTCTG
>OTU_2158	AAGTCGTAACAAGGTCTCCGTTGGTGAACCAGCGGAGGGATCATTACAGAGTTGCAAAACTCCCAAACCATTGTGAACGTTACCTTTAACCGTTGCTTCGGCGGGCGGCTCCGGGATCACTCCCGGGGCCCCCGGCCCTACTCGGGCGCCCGCCGGAGGTCACCTAACTCTTGATAATTTATGGCCTCTCTGAGTCTTCTGTACTGAATAAGTCAAAACTTTCAACAACGGATCTCTTGGTTCTG
>OTU_2159	AAGTCGTAACAAGGTCTCCGTTGGTGAACCAGCGGAGGGATCATTACAGAGTTGCAAAACTCCCTAAACCATCGCGAACGTTACCCCAAACCGTTGCTTcggcgggcggccgcgggctcacccccgcggcccccgggccccctccagggcgcccgccggAGGCTCCAACTCTTGAACTTTTATGGCCTCTCTGAGTCTTTGTACTTAATAAGTCAAAACTTTCAACAACGGATCTCTTGGTTCTG
>OTU_216	AAGTCGTAACAAGGTAACCGTAGGTGAACCTGCGGTTGGATCATTAAAAAATCTGAAAAAATTCATTCGGAACGGTTAAAACCAAGTACGAATGAGGGATTTCATACCCACATTCTGTGAACTTGTATACTGTCTCTGGCGGGGGAGAACGGAGGTTGAATTTTCTTCTGAACTTCTCGTCAGCCCGGATCACCCTCCAAGGTGAGCCGGTGCCGTGGACATCCCGCCAAACTCTTCCGACGGGAGACCTTTCCAAGGTTTCGCGTTCGGAAGATTGTGCTCACCTTTTGCATCTGTTTTTTTGGGAACGCTTCTGAGAATTTGGTCGGGCGAATGCTCGGTCTCTTTTGAAATAATTATTCAAAACAACTTTTGGCAACGGATCTCTTGGCTCTC
>OTU_2160	AAGTCGTAACAAGGTTTCCGTAGGTGAACCTGCGGAAGGATCATTAACACTAATGAAATCCAAAACCTTTTGGATCAACCCAACCTTAGCGAACCGTTCGTATATTTTCCCTTGCCCCAATTTTACCAAACGCAAAAAACTCTGATGTAACGTGTCTGATTCTTATTCTCGTTTCGGTTGTAATGACCCAGCGGGAATCAAAATCTAACGCAATACAACTCTTAACAACGGATATCTTGGCTCTC
>OTU_2161	AAGTCGTAACAAGGTCTCCGTTGGTGAACCAGCGGAGGGATCATTAAAAATAGGGCACTTATGCGCTATACACCACTGTCAACATACCCTGTCTCGTTGCCTCGGCGGGCGGATCCCGGGGGAGCCCTCCCGGCCATCGCGGTGCTCGCCGGCAGCGACCCTTCTCTACTCTGAACGTCTCCTCTGAGTGGCACGCTGAAAAGCAAGAATTATCAAAACTTTCAACAACGGATCTCTTGGCTCTG
>OTU_2162	AAGTCGTAACAAGGTCTCCGTTGGTGAACCAGCGGAGGGATCATTACAGAGTTGCAAAACTCCCAAACCATTGTGAACATACCCAAAACCGTTGCTtcggcgggcggcgcccgggcctccccggcgcctctcggccccccgcgggcgcccgccggAGGTTACCCAAACTCTTGATACATTATGGCCACTCTGAGTCTTCTGTACTGAATAAGTCAAAACTTTCAACAACGGATCTCTTGGTTCTG
>OTU_2163	AAGTCGTAACAAGGTCTCCGTTGGTGAACCAGCGGAGGGATCATTACTGAGTACTACACTCTCTACCCTTTGTGAACGTTACCTTCAAACCGTTGCTTCGGCGGGCGGCCCGGGTCCGCCCGGTGCCCCCTGGCCCCCTCGCGGGGCGCCCGCCGGAGGAAACCCAACTCTTGATACATTATGGCCTCTCTGAGTCTTCTGTACTGAATAAGTCAAAACTTTCAACAACGGATCTCTTGGTTCTG
>OTU_2165	AAGTCGTAACAAGGTTTCCGTAGGTGAACCTGCGGAAGGATCATTACCAATCCACCTTTTATAAACAACTGTGAACTGTTATTGTCCTTGGGTGACATCTGGATGTAGCAATACGTCCTTTGCCACCCAAACAATTTCAAACACCTTTCATAAACATTACCTGTTGAACAACTTCTTTGTGACCTTCCACGGTTCAAAGATTAAAATAATGAATACAACTTTTAACGGTGGATCTCTTGGCTCAT
>OTU_2166	AAGTCGTAACAAGGTTTCCGTAGGTGAACCTGCGGAAGGATCATTACCGAGTATTGGGTTTAAAAGCCCGCACTCCAACCCTCTGTGTATTCGACCTTGTTGCTTTGGCGGGCCTGCGGGTAACACCGCTGCCGGCTCTTTGCTGGCTAGTGCCCGCCGGAGAACCACTAAACTCTTGTTTTAACGGTGTCGTCTGAAGTCTATTTTAATAGTTAAAACTTTCAACAACGGATCTCTTGGTTCTG
>OTU_2168	AAGTCGTAACAAGGTCTCCGTTGGTGAACCAGCGGAGGGATCATTACAGAGTTGCAAAACTCCCTAAACCATTGTGAACGTTACCTTCAAACCGTTGCTTCGGCGGGCGGCCCGGGTCCTTCCCGGCGCCCCCCGGCCCTCGCGGGCGCCCGCCGGAGGTAAACCCAACTCTTGATTATTATGGCCTCTCTGAGTCTTCTGTACTGAATAAGTCAAAACTTTCAACAACGAATCTCTTGGTTCTG
>OTU_2169	AAGTCGTAACAAGGTTTCCGTAGGTGAACCTGCGGAAGGATCATTAATGAATTCTTATTCATTCATGTATGTGAACCCTGGGATAAGGCCTCTGGTCGATGCCCGCTGAAGCTGATGGACCTGTGAGCCATCGGCCTTTAATTAACCAACCTTTATTATCTATGCGCACTGAGACTGAAGCACTTTGTGATGAGTGTAAAAACTTAACATGAAGACAACTTTTAGCAACGGATCTCTAGGCTCTC
>OTU_217	AAGTCGTAACAAGGTTTCCGTAGGTGAACCTGCGGAAGGATCATTACAACGTATCCACGTACAAACCAGTGAACTGTTCCCAACGGAATGAGATACAAAAGCAATTTTGTATTCGAGGTTGATGGCATGTGTGGTTCCTGCTGATGGAGTTTCTGGGCTTTTGCCTCGAAACTAGGGCCTAACATACCGCGAAAGCTTTTGGCTTTCGGACCTCAAGCTCTTCCGTTTGGTTGATTACCGTCAGCTTGTAAAACCCTTTATTAACCCTATGTACCATTTGATCTGATCTATTCTGTCTGAAAACGCGTTCTTGTTGGCTTTAAGTCACGAACCGTCTCAGCAGGAGTTTTGATACGAAACAAAGAACAACTCTTAACAACGGATATCTTGGTTCCC
>OTU_2170	AAGTCGTAACAAGGTTTCCGTAGGTGAACCTGCGGAAGGATCATTCGTAAGCAAGTGTTTTTATGGCACTTTCAAAATCCATATCCACCTTGTGTGCAATGTCATCTCATTGGGGGAGGTCACGGCTGTAAAAAGCCGTCGGCCAACCTTATGGGATTTATAACTACTCAAAGCTTAGTAATTTTGTCTGATAACCTATTATGAATAACTTAATACAACTTTCAACAACGGATCTCTTGGCTCTC
>OTU_2173	AAGTCGTAACAAGGTTTCCGTAGGTGAACCTGCGGAAGGATCATTAAAAAACACAGCGGGTCCTCTTTGAAATAGTAACGGGATGTCTGAACCCTTGAATACAAACCTTTAGTTGCTTTGGCGGGCTGCCTCCGGGCGTCGGCCTCGGCTGATTGTGCCCGCCAGAGAACAAAAACTCTTATTTTTAGTGGAGTCTGAGTACTATATAATAGTTAAAACTTTCAACAACGGATCTCTTGGTTCTG
>OTU_2174	AAAAGTCGTAACAAGGTCTCCGTAGGTGAACCTGCGGAGGGATCATTACAGAGTTCATGCCCTAGCGGGTAGATCTCCCACCCACTGTTATTGTTACTGTCGTTGCTTTGGCGGGCCGCCGGGCCCAGCTCGGCCGCCGGCTCCGGCTGGCGCGCGCCCGCCAGAGGCCTTCAAACTCTGAATGTTAGTGTCGTCTGAGTACTATACAATAGTTAAAACTTTCAACAACGGATCTCTTGGTTCTG
>OTU_2175	TAGTCGTAACAAGGTTTCCGTAGGTGAACCTGCGGAAGGATCATTACTGAGTGAGGGTCCCTCGGGGCCCAACCTCCCACCCGTGTATACCGTACCTTGTTGCTTCGGCGAGCCCGCCCCCTTTTTCTTTTAGGGGGCACAGCGCTCGCCGGAGACACCAACGTGAACACTGTCTGAAGTTTTGTCGTCTGAGTCGATTGTATCGCAATCAGTTAAAACTTTCAACAATGGATCTCTTGGTTCAG
>OTU_2177	AAGTCGTAACAAGGTTTCCGTAGGTGAACCTGCGGAAGGATCATTACCGAGTGCGGGCCCAACCTCCCACCCGTGTTTACTGTACCTTAGTTGCTTCGGCGGGCCCGCCATTCATGGCCGCCGGGGGCTCTCAGCCCCGGGCCCGCGCCCGCCGGAGACACCACGAACTCTGTCTGATCTAGTGAAGTCTGAGTTGATTGTATCGCAATCAGTTAAAACTTTCAACAATGGATCTCTTGGTTCCG
>OTU_2178	AAGTCGTAACAAGGTCTCCGTTGGTGAACCAGCGGAGGGATCATTACCGAGTTTACAACTCCCAAACCCAATGTGAACGTTACCAAACTGTTGCCTCGGCGGGATCTTCTGCCCCGGGTGCGTCGCAGCCCCGGACCAAGGCGCCCGCCGGAGGACCCAATCTCAAACTCTTTGTCTCCACGAGCATCTTCTGAGTGATACAAGCAAATAAATCAAAACTTTCAACAACGGATCTCTTGGTTCTG
>OTU_2179	AAGTCGTAACAAGGTTTCCGTAGGTGAACCTGCGGAAGGATCATTACTGAGTGAGGGTCCCTCGGGGCCCAACCTCCCACCCGTGTATACCGTACCTTGTTGCTTCGGCGAGCCCGCCCCCCTTCCTTAGGGGTGGCACAGCGCTCGCCGGAGACACCAACGTGAACACTGTCTGAAGTTTTGTCGTCTGAGTCGATTGTATCGCAATCAGTTAAAACTTTCAACAATGGATCTCTTGGTTCCG
>OTU_218	AAGTCGTAACAAGGTTTCCGTAGGTGAACCTGCGGAAGGATCATTATCGAGAGGGGCGTCGCTGGTCTTGGCAGAAACATGCAAGTCCGTGGAGCCAAAATCTACCCTCAACCCCTTGTGAACCTTGGTTGCCAGTGCGTGCTGCTGCTGGCGAGACAGCTTGGAATGTAGAAAGTGGTCTCTGTTGGCAGCAGCTAAACCATTGAGCAGTCAGTCCttttttttttCTCTCAACCTTGTTGTTTGCAATGTCTATTTCAATCTAAAAGTGCAAACGTGAATCTCGATGTGTTCTATTTTGAGCACGGGTACTCTTTTATCTCGGCTCAAAAGCGAACCATCGGAGGCACACTCAATGCATTAAGATAACTTTCAGCAACGGATCTCTTGGCTCTC
>OTU_2180	AAGTCGTAACAAGGTTTCCGTAGGTGAACCTGCGGAAGGATCATTCACAATAAGTGTTTATGGCACTTTCAAATCCATACCCACCTTGTGTGCAATGTAAGAGAGCCCTTTTCAACTCTCTCTCCTCTGGGAGGGAAAAGGAGGATTGGGCTTCATTTTCTCTCACACGTCTTCAATTGCAAGTCTAACCTTCAGAGTAATCAAAACTCGAATACAACTTTCAACAACGGATCTCTTGGCTCTC
>OTU_2181	AAGTCGTAACAAGGTCTCCGTTGGTGAACCAGCGGAGGGATCATTACAGAGTTGCAAAACTCCCAAACCATTGTGAACTTACCTACCCCGTTGCTTcggcgggcggcccgggccccgcgcccggcgccccccggccccccgtgggcgcccgccgGAGGTAAAACAAACCCTTGAATTGCATGGCCTCTCTGAGTCTTCTGTACTGAATAAGTCAAAACTTTCAACAACGGATCTCTTGGTTCTG
>OTU_2182	AAGTCGTAACAAGGTTTCCGTAGGTGAACCTGCGGAAGGATCATTACCGAGTATTGGGTCTTAGTGCCCGCACTCCAACCCTTTGTGTAACTAAAACCGTTGCTTTGGCGGGCCCGCGGTGTAATGCCGCTGCCGGCTCACGCTGGTTAGCGCCTGCCAGAGAACCATTAAACTCTTGTTAATTCAGTGTCGTCTGAGCAAAACTTAATAATTAAAACTTTCAACAACGGATCTCTTGGTTCTG
>OTU_2183	AAGTCGTAACAAGGTCTCCGTTGGTGAACCAGCGGAGGGATCATTACAAAACGAGTGCTTCGGCTCTCCAACCCATTGTGAACATACCTATCGTTCCCTCGGCGGGCTCAGCGCGCGGCCGGCCTCCGGGCCACCGGGCGTCCGCCGGGGACAACCAAACTCTGATTTTATTGTGAATCTCTGAGGGGCGAAAGCCCGAAAACAAAATGAATCAAAACTTTCAACAACGGATCTCTTGGCTCTG
>OTU_2184	AAGTCGTAACAAGGTTTCCGTAGGTGAACCTGCGGAAGGATCATTGAAAAATGCAGCACCTCTTTGAGGTGTCTGCGAACCATCTTGCGCCGGTCGCCAGACCGACGCTTTTCTCTTTAGAGGGCCTGAATTATTAGACTTATGTTTGTTGTTTAGGAGGGTCTCTGGAAGTCGGGTTTTCCCGTCTTGCAGGTCCCGAAAATAACTGAAAATACAACTTTTAACAATGGATCTCTTGGCTCTC
>OTU_2185	AAGTCGTAACAAGGTTTCCGTAGGTGAACCTGCGGAAGGATCATTATGAATTTGATTGGGTTTCTCTTTCTTATGGGGAGAGAGCTTTCATTTTCTGTGAACTGTTTTGGAGCTGGCCTTTGTGTTTGCTTCCAATCTTTTTTTGTTTTCTTGTCTTCTATTCCACTCTTTTCTAGCTGATTTCATCAGCCAAGaaaataaaaaaaaaCCAAGACAACTTTCAGCAATGGATCTCTTGGCTCTT
>OTU_2186	AAGTCGTAACAAGGTTTCCGTAGGTGAACCTGCGGAAGGATCATTATTGAATTAGACGGGAAACGAGCTGGTTTCTACAAGTGCTCTTTCCCTGATTCTTTAACCATACACCTGTGAACTTGGGGAGACTCTTAATTGAGACTCTCCTTATTATTAACAAACTCTCTAATAAACTATCGAACGTGATTGTGCCGAAAGGCCTTAATTTTATAAACAACTTTTAACAACGGATCTCTTGGCTCTC
>OTU_2187	AAGTCGTAACAAGGTCTCCGTTGGTGAACCAGCGGAGGGATCATTACAGAGTTGCAAAACTCCCCAAACCATTGTGAACCTTACCTTCAAACGTTGCTTCGGCGGGCGGGCCACAGCGccccccgggccccccccAGCGGGGGCGCCCGCCGGAGGATACCCAAACTCTTTGATACTTTATGGCCTCTCTGAGTCTTCTGTACTGAATAAGTCAAAACTTTCAACAACGGATCTCTTGGTTCTG
>OTU_2188	AAGTCGTAACAAGGTCTCCGTTGGTGAACCAGCGGAGGGATCATTACAGAGTTGCAAAACTCCCTAAACCATTGTGAACCTTACCTCAACCGTTGCTTcggcgggcgggcccgggccatgcccggcgccccccggccctcgcgggcgcccgccggAGGTTAACCGAACCCTTGAATTGTATGGCCTCTCTGAGTCTTCTGTACTGAATAAGTCAAAACTTTCAACAACGGATCTCTTGGTTCTG
>OTU_2189	AAGTCGTAACAAGGTCTCCGTAGGTGAACCTGCGGAGGGATCATTACCGAGCTCATGCCCTACCGGGTAGATCTCCCACCCTGTGTTATTATTACCTTTGTTGCTTTGGCGGGCCGCCGCGCTCCGGCCTGGCTACCGGCTCCGGCTGGTAAGCGCCCGCCAGAGGACCCCAAACCCTGAATGTTAGTGTCGTCTGAGTACTATATAATAGTTAAAACTTTCAACAACGGATCTCTTGGTTCTG
>OTU_219	AAGTCGTAACAAGGTTTCCGTAGGTGAACCTGCGGAAGGATCATTAGAGAAAACAAAAACCTTCTAGTGGAGAGTGCTGGAGGAGCCATGGAGGAGTGCGTATACTGCGGGAAGGCCAGCGCTTAGTTGCGCGGCGTCTGCGGGTGCTTCGCCGGGAGCCTCTGCTACAGGTGCTCTGCACGTAGAACACACACACAGTGGAGACACGTATGCACGTTTTTCTGGGTGCACGAGTGCTTTGGGCCGGCGACGGTCCAGAGTGCGGCACGCAAAACACAAACAAAAATGCAGTATAAAAGAAAACAGTCAAGATTTCAAGCCTGGACAGCACGAGAGTGCGGGCCGGCGAATAGAACAAATATTCAAAACTTTCAACAACGGATCTCTTGGTTCTC
>OTU_2190	AAGTCGTAACAAGGTCTCCGTTGGTGAACCAGCGGAGGGATCATTACAGGACTCGCAAGACTCCCGTAAACCACTGTGAACTTACCTACAACCCGTTGCCTCGGCGGGTGCTCCGGGCGCGTCTTCGGGCGCTCCGGGGCGCTCCAGCCCGCCGGCGGCCCCTAAACTCTGTCTCTGTAACGTTGGCATCTCCGAGCAGACTATAAACGAGTCAAAACTTTCAACAACGGATCTCTTGGTTCTG
>OTU_2191	AAGTCGTAACAAGGTCTCCGTTGGTGAACCAGCGGAGGGATCATTACAGAGTTGTAAAACTCCCAACCATTGTGAACCTACCTCACCGTTGCTTCGGCGGGTGGCCCGGGGCAACCCAGGCCGCGCCGGCCCCGCTCGCGGGGCCCGGCAAACCCGTCAGAGGCCCGAAACTCTGTTATCATTGGCCTCTCTGAGTAACTTATACAATAAGTCAAAACTTTCAACAACGGATCTCTTGGTTCTG
>OTU_2192	AAGTCGTAACAAGGTCTCCGTTGGTGAACCAGCGGAGGGATCATTACAGAGTTGCAAAACTCCCAAACCATTGTGAACGTTACCTTTAACCGTTGCTtcggcgggcggcgcccgggcctccccggcgcctctcggccccccgcgggcgcccgccggAGGTATACAACCCTTGTACTTTGTATGGCCTCTCTGAGTCTCTGTACTTAATAAGTCAAAACTTTCAACAACGGATCTCTTGGTTCTG
>OTU_2193	AAGTCGTAACAAGGTCTCCGTAGGTGAACCTGCGGAGGGATCATTACACAAAGATATGCAGGTGGGGTGCTGGCAACAGTGCTCTGCTGAATTATTTTCACCCATGTCTTCTGCGCACTTTTTGTTTCCTGGGCGAGTTCGCTCGCCACCAGGACCCCCATATAAACCTTTTTTGTTCTTGCAATCAGCGTCAGTACAATAATTTAATTTATTAAAACTTTCAACAACGGATCTCTTGGTTCTG
>OTU_2194	AAGTCGTAACAAGGTTTCCGTAGGTGAACCTGCGGAAGGATCATTACCCTTCATCAGAGAGTTGGGTGTTGGGGCTTCTCGCTCTGCCCAGCCCTCTCTGATTCTACCCGTGTCTTTTGTTACTATTTGTTGCCTTGGCGGGCTTGCCCGCCTAACGGACACTCATACAACCCTTTGTAATTGCAGTCAGCGTCAGTACAACCGTAATAAATTACAACTTTCAACAACGGATCTCTTGGTTCTG
>OTU_2195	AAGTCGTAACAAGGTCTCCGTAGGTGAACCTGCGGAGGGATCATTACCGAAGTTACCCTTCAAAACCCTTTGTGAACGTTACCTCTTGCCGCGTTGCCTCGGCGGGAGGCGGTGGGAAGTCTCTCCGGAGGCCCCCGCCGTCCCCGCCGGCAGCGCCAAAACTCTATTTGCACAGCGGACTGTATGTTCTGATTTATaaaaaaaaaaCAAGTTAAAACTTTCAACAACGGATCTCTTGGTTCTG
>OTU_2196	AAGTCGTAACAAGGTCTCCGTTGGTGAACCAGCGGAGGGATCATTACAGAGTTGCAAAACTCCCTAAACCATTGTGAACGTTACCTAAACCGTTGCTTCGGCGGGCGGCCCGGGTCCTTCCCGGCGCCCCCCGGCCCTCGCGGGCGCCCGCCGGAGGTAAACCAAACTATTGACAATTGTATGGCCTCTCTGAGTCTTTGTACTTAATAAGTCAAAACTTTCAACAACGGATCTCTTGGTTCTG
>OTU_2197	AAGTCGTAACAAGGTCTCCGTTGGTGAACCAGCGGAGGGATCATTACAGAGTTGCAAAACTCCCTAAACCATTGTGAACGTTACCTAAACCGTTGCTTCGGCGGGCGGCCCGGGTCCTTCCCGGCGCCCCCCGGCCCTCGCGGGCGCCCGCCGGAGGTTACCAAACTCTTTGATACCTTATGGCCTCTCTGAGTCTTCTGTACTGAATAAGTCAAAACTTTCAACAACGGATCTCTTGGTTCTG
>OTU_2198	AAGTCGTAACAAGGTCTCCGTTGGTGAACCAGCGGAGGGATCATTACCGAGTTTACAAACTCCCAAACCCTTTGTGAACCTTACCATATTGTTGCTTCGGCGGGACCGCCCCGGCGCCTTCGGGCCCGGAACCAGGCGCCCGCCGGAGGCCCCAAACTCTTATGTCTTTAGTGGTTTTCTCCTCTGAGTGACACATAAACAAATAAATAAATCAAAACTTTCAACAACGGATCTCTTGGTTCTG
>OTU_2199	AAGTCGTAACAAGGTCTCCGTTGGTGAACCAGCGGAGGGATCATTACCGAGTCTAGCACTCCCAAACCCACTGTGAACCGATACCTATCGTTGCTTCGGCGGCTCCGCCCCGCGGCCCTCGGGCCCGGAACCAGGCGGCCGCCGGAGGCCCGCAAACCCTACTGTATATCGTCCCACCGGCGGCATTGTCTGAGTACCAACAGAAAACGAATCAAAACTTTCAACAACGGATCTCTTGGTTCTG
>OTU_22	AAGTCGTAACAAGGTAACCGTAGGTGAACCTGCGGTTGGATCATTAATAAGTTTTGGTTCATAACCAAACAACCCTGTGTGCTATGTTTTCTGTTTCTCGTGGTTCGAGTGTATATTTTTTATAATGAAAAATATGCCTGCCTTTGGCTTTGATGAGATTTGTTTCTTGTTGGCCGAGTGGCTGTTCCACGGAAGGGATCTAGGAGTGTTAAGTTCTTTGGAGTTTTCACTTTGAGATCCTGTCAAAGAGCTTTTGAATTGTTGACTTCTTTTTATAAGTGTTTCTGATTGATGACTCTGCTTAATTGTGTTGAGTTTCTTTGGGACCTTTGAATAGATATCCATTGAGAGGGCTCTTTAATCAACCTAATAAAGTATTTTTATATGTCTTATTTTTTC…
>OTU_220	AAGTCGTAACAAGGTTTCCGTAGGTGAACCTGCGGGAGGATCATTAACAACGTATCCTAAACGTAAAAAACCCCCCTGTGAACCTTCATAACCCGAGCTAGGCCCGCGAAATTCAGCAATCCCTGGTAAATCATTGTTGACCAGCTCTTTGAGTCAGGGATATCCGAACTAGTCGTGTGGATTAAGTTCCGTGAAGCAAGAGCGGTGAGGCAAGTGATCCGGGACCCCCAAGCAATCAATGTTCTGTCAGTGTCGTTGATTGTGTAAGGGTGGCGCAGTAAACGATCGCTGGATGCACGGCCGGCGACTGGGTCAGCGAGCTCTGCTCCCTAATAACGGCGAAAGCTTGAGCACCAAAAACTAATACGACGTTAACAATGGATATCTTGGTTCTC
>OTU_2200	AAGTCGTAACAAGGTCTCCGTTGGTGAACCAGCGGAGGGATCATTACAGAGTTGCAAAACTCCCTAAACCATCGCGAACGTTACCCCAAACCGTTGCTTCGGCGGGCGGCCGCGGGCTCAcccccgcggcccccgggccccccccAGGGCGCCCGCCGGAGGCTCCAACTCTTGAATTTATGGCCTCTCTGAGTCTTCTGTACTGAATAAGTCAAAACTTTCAACAACGGATCTCTTGGTTCTG
>OTU_2201	AAGTCGTAACAAGGTTTCCGTAGGTGAACCTGCGGAAGGATCATTACTGCTTGCTTATGGCCGCTTAGGTGGGGAGACCCCCTTTGCGGTACGGCAACACACCCTTGTCTATGTATACCATTTGTTATTTCCCTCGGCGGGGCAACCCGCCGCTGGGGACAATAAAACCTCTTGTATTAAGCATTAAAACTTCTGAAACAAACCTAAATTATTACAACTTTCAACAATGGATCTCTTGGTTCTG
>OTU_2202	AAGTCGTAACAAGGTCTCCGTAGGTGAACCTGCGGAGGGATCATTACAGAGTTCTCGCCCTCACGGGTAGACCTCCCACCCACTGTGATTGTTACCGTCGTTGCTTTGGCGGGCCGCTGGGCCCCGCTCAGCCACCGGCCCCGGCTGGTGCGCGCCCGCCAGAGGCTCCGCAAACTCTTGATGTCAACGTCGTCTGAGTACTATATAATAGTTAAAACTTTCAACAACGGATCTCTTGGTTCTG
>OTU_2203	AAGTCGTAACAAGGTCTCCGTTGGTGAACCAGCGGAGGGATCATTACAGAGTTCTACAACTCCCAACCCCTGCGAACCGTACCCCCAGTTTGTTCTCGTTGCCTCCTGGCGGCGGGCCCCCGGCGCCACCGCCGGGGCCCCCGCCAGCGGCGGCGAGCCCCCTGAACCTCTTTTTCTCAACCAGCCCGTCTGAGCAAAACAAACAAATGAATCAAAACTTTCAACAACGGATCTCTTGGTTCTG
>OTU_2204	AAGTCGTAACAAGGTCTCCGTAGGTGAACCTGCGGAGGGATCATTACACAAATATGAAGGCGGGCTGGAACCTCTCGGGGTTACAGCCTTGCTGAATTATTCACCCTTGTCTTTTGCGTACTTCTTGTTTCCTTGGTGGGTTCGCCCACCACTAGGACAAACATAAACCTTTTGTAATTGCAATCAGCGTCAGTAAAAACAATGTAATTAATTACAACTTTCAACAACGGATCTCTTGGTTCTG
>OTU_2205	AAGTCGTAACAAGGTTTCCGTAGGTGAACCTGCGGAAGGATCATTAGAAATAATCCGGCTTAGCCGGTTATAAAATTCTACCCACCTTGTGTGCAAACAATGGAAAAGAGAGAAAATTGGATTCTATTTTTTAAGTATCCAACTTCTCTAAAATTTTTATAAACTCCATCAAATTTTTAATTGAAAACAtttttttttAATAAAAAACATTATACAACTTTCAACAACGGATCTCTTGGCTCTC
>OTU_2206	AAGTCGTAACAAGGTCTCCGTTGGTGAACCAGCGGAGGGATCATTACCGAGTTTTCAACTCCCAAACCCCTGTGAACATACCTATCGTTGCCTCGGCGGGAGAGCCCCGGGCGCTGGCGCAAGCCTCGCACCGGTACCAGGCGCCCGCCGGAGGACCCAACACAAACTCTTTGCATTCTAGAGAATCTTCTGAGTGATTATAAGCAATAAATTAAAACTTTCAACAACGGATCTCTTGGTTCTG
>OTU_2207	AAGTCGTAACAAGGTTTCCGTAGGTGAACCTGCGGAAGGATCATTCATAATAAGTGTTCTATGGCACTTCTTAAATCCATACCCACCTTGTGTGCAATGTTATCTCTCAGCGTCGGTTCAGGTTCGCCTGGCCCTGCTGAGGGATTCTACATCAACTCTTAATTTAACAAATTTGTCTGAATATCTATTTCTGAATAAACATAATTCAAAAATACAACTTTCAACAACGGATCTCTTGGCTCTC
>OTU_2208	AAGTCGTAACAAGGTAACCGTAGGTGAACCTGCGGTTGGATCATTACAAAATGTGATTCCTTGGTGTCGAGGCCTTCGGGCTTCCGCCGGGATACCAACCCTTTGTGCACTGTATTGTTTTTTGGGTGCTTCGAAGAGTGAGCAATCATTCGAGGAGCGCCCAGTCTAGTTAAACCTCTTAATCTTTGACTTATCCTATAATGTAAATTATAAACAACTTTTGACAATGGATCTCTTGGCTCTC
>OTU_2209	AAGTCGTAACAAGGTTTCCGTAGGTGAACCTGCGGAAGGATCATTAGTGAATTAAACATGCTTGGTGTCTTCGCTTCGGCAAGGCCCTTGCTTAAATCACATCCTAACACCTGTGAACTGTAAGACGTATGATGAGGTCTTTGGACCAAGTCATCGTCTGCCCATTTTTAACAAACAATTAATGTAACAAACGTAGTCTTATTATAACCTAATAAAACTTTCAACAACGGATCTCTTGGCTCTC
>OTU_221	AAGTCGTAACAAGGTTTCCGTAGGTGAACCTGCGGAAGGATCATTACAACGTATCCACGTACAAACCAGTGAACTGTTCCCAACGGAGCGAGATACAAAAGCAATTTTGTATTCGAGGTTCATGGCATGTCTGGTTCCTGCTGATGGAGTTTCTTGGCTTTTGCCTCGAAACTAGGACCTGGCATACCGCGAAAGCTTCTGGCTTTCGGACCTCAAGCTCTTCCGTTCGGTTGATTACCGTCAGCTTGTAAAACCCTTTATTAACCCTATGTACCATTTGATCTGATCTATTCTGCCTGAAGGCGTGTTCTTGTTGGCTTCAAGTCACGAACCGCATCAGCAGGAGTTTGATACGAAACAAAGAACAACTCTTAACAACGGATATCTTGGTTCCC
>OTU_2210	AAGTCGTAACAAGGTCTCCGTTGGTGAACCAGCGGAGGGATCATTACCGAGTTTACAAACTCCCAAACCCCTGTGAACATACCAATCGTTGCCTCGGCGGGAGAGCCCCGGGCGTTGGCGAAAGCCTCGCACCGGTATCAGGCGCCCGCCGGAGGACCCAAACAAACTCTTGAATTCTAAAGTATCTTCTGAGTAATATAAGTTAAATAAATTAAAACTTTCAACAACGGATCTCTTGGTTCTG
>OTU_2211	AAGTCGTAACAAGGTCTCCGTTGGTGAACCAGCGGAGGGATCATTACCGAGTTACCAAACTCCAAACCCACTGTGAACCTACCTGTATTTGTTGCTTCGGCGGGCGGCTCCGGGGAGCCCCTCCAGGCCCGCAAGGGTGCCTGCCGACAGTACCACAAAACTATTTTCTTTTTTAGCGGCTTAAGCTTCTGAGTGGAAAAATTTAAACAAGTAAAAACTTTCAACAACGGATCTCTTGGTTCTG
>OTU_2212	AAGTCGTAACAAGGTTTCCGTAGGTGAACCTGCGGAAGGACCATTCATAATAAGTGTTTTATGGCACTTTTTTAATTCCATATCCACCTTTTGTGCAATGTCAGGTTGGTCTCtttttttttaaaaaaaaagaaaaaaGAGGTCGGCCCAAGCATCAACCGTATCTTTTAACTCCTTTGTCTGAAAAATATTATGAATAAAACAATTCAAAATACAACTTTCAACAACGGACCTCTTGGCTCTC
>OTU_2213	AAGTCGTAACAAGGTCTCCGTTGGTGAACCAGCGGAGGGATCATTACTGAGTTATTCAACTCCAAACCCATGTGAACATACCAATGTTGCCTCGGCGGGACAGACCTACCCGGGACTTACCCGGTAGCTACCCTGTAGCTGCAGGTCTACCTGCCGGTGGATTACAAACTCTTGTTTTTACGTAACACTTCTGAGTATACTATAAAATAAGTTAAAACTTTCAACAACGGATCTCTTGGTTCTG
>OTU_2214	AAGTCGTAACAAGGTTTCCGTAGGTGAACCTGCGGAAGGATCATTCAAAATAAAAGTGAATTTTATGGCACTTTTAAAAAAATCCATATCCACCTTGTGTGCAATGTAATTTTGAAAGAGGATTTATTTCCTCTTTCTAAAATCATATCAACTCTTTGCTTTGAACCTGTTTGTCTGATATAAAAATATTCTTGAATAACTTAATTCAAAAATACAACTTTCAACAACGGATCTCTTGGCTCTC
>OTU_2215	AAGTCGTAACAAGGTCTCCGTAGGTGAACCTGCGGAGGGATCATTCACATGATTTACTTTATAAACAAACCGTGAACTTTATTTACTATTCTTGTTGGGAttttttttCAACAATGTCATTCGATGAACATTAGATAGCTGGCTTGTATTTATACTTTCTCAGCTGATTTTTGAATAGACTAAACATCTAATCAAAATCAACCAAACATAGAAACAACTCTATGCCCTGGATATCTTGGTTCTC
>OTU_2216	AAGTCGTAACAAGGTTTCCGTAGGTGAACCTGCGGAAGGATCATTACCTTTCAATGCAGCAGAATTGGGATGGTTGAGTATCTCGCCTTCCAATTCTGCCTGTATTCCATCCTTGTTTGTCATACTATTATTTCCTCGGCAGGCTTGCCTGCCGAGTGAAACCAATTATAACCTATTTAATTTTCAATCAGCGTCTGAAAAAAATTAATAATTACAACTTTCAACAACGGATCTCTTGGTTCTG
>OTU_2217	AAGTCGTAACAAGGTTTCCGTAGGTGAACCTGCGGAAGGATCATTACCGAAGTACAGGCCCTCTCGAGGGCTAAACTTCCACCCCTTGTTAACTATACCTTATGTTGCTTTGGCGGACCGCCCTAGGCCACCGGCTCCGGCTGGTGAGCGTCCGCCAGAGACCCTCAAACCCAAACCCATATTAGTGTCGTCTGAAAACAAGTTTAAATTATTAAAACTTTCAACAACGGATCTCTTGGCTCTG
>OTU_2218	AAGTCGTAACAAGGTTTCCGTAGGTGAACCTGCGGAAGGATCATTACCGAGTCATTGAACCCCACACTTTGTGGGGCCAATCTCCAACCCAATGCTTACCCTGCACCTTTGTTGCCTTGGCATGCGAGCCAGTCTGCGCCAGTGGTCGCGTGCACGCATGCCAGTGGATCCTACCAAACTCGTCAACTCTGTCGTATGGTTATCAAATACTATAAAACTTTCAACAACGGATCTCTTGGTTCTA
>OTU_2219	AAGTCGTAACAAGGTTTCCGTAGGTGAACCTGTGGAAGGATCATTATGAATTTGATTGGGTGGCttttttttAAAGGGCTGCTTTCATTTTCTGTGAACTGGCGCTCTTCTCTTTTTGGAGGGATTGGAGTGTATTTTGTATTCTTGATTTCTATTCCAAATTGATTTGATTGAATCTCTGCAAGGAGAATCGATTGAGTTATAAAAACCAAGACAACTTTCAGCAATGGATCTCTTGGCTCTT
>OTU_222	AAGTCGTAACAAGGTTTCCGTAGGTGAACCTGCGGAAGGATCATTAACACGTATCCAACGTTAAAACAACCCTGTGAACCTTTAGCGTGCTCTTGCAGCCCATGAAAGCAGCAATCCCTGGAAAATCATTGATGACCAGCTTTTGAGTCAGGGACCTCTGCCGATGAGAAGTTACAGTTGCAATTGAGCGCTTGCTTAAGTGACCTGGCATCTGTCTGAAAGTGTCACTGGTTGTGTAAGGATGGCGCAGTAACGATCGCTGGAGGCCCACACGGCCGGCGACCGGGTCACCGGGCTCACGCCCCTTAACCAACCCCAATGTGTCTGACCCGCTGGTTGGTAACGCTCCAGCACAAAAACCGAACAACTGTTAACAATGGATATCTTGGTTCTC
>OTU_2220	AAGTCGTAACAAGGTCTCCGTAGGTGAACCTGCGGAGGGATCATTACACAACAAAATATGAAGGTCTGGCTTCGCGGCCGGCTGAAATATTTTTTCACCCATGTCTTTTGCGCACTTGTTGTTTCCTGGGCGGGTTCGCCCGCCACCAGGACCAAACCATAAACCTTTTTTTAATGCAGTTGCCATCAGCGTCAGTAAAACAATGTAATAATTACAACTTTCAACAACGGATCTCTTGGTTCTG
>OTU_2221	AAGTCGTAACAAGGTCTCCGTTGGTGAACCAGCGGAGGGATCATTACCGAGTTATCGCTCAAAACCCACTGTGAACCTTACCGTACGTTGTTGCTTCGGCGGGCGGCCCCGGGGGGGCCCCGGGCCTTTTTCAGGTGCCCGCCGACAGCGCCTCATGCTCTGTATATCTGCCTAGCGTCGTCTGATTTGGATTGCTCCAAGCGAGAAATACTAAAAACTTTCAACAACGGATCTCTTGGCTGTG
>OTU_2223	AAGTCGTAACAAGGTTTCCGTAGGTGAACCTGCGGAAGGATCATTACAGAAATAATAATTTCATTTGAACATACACACCCTTCCTGTGCACTTTTGCGTGAGCAAAGTAAAGTGCCCCTATTGAGTTAGGGGTATTTGAAATGCTTGCGAGTTTTATTACAATACACTCTGTTATATAAAAGTTTGTTTGCATGTGTTATACAATATATCTATATAACTTTCAGCAACGGATCTCTTGGCTCTC
>OTU_2224	AAGTCGTAACAAGGTTTCCGTAGGTGAACCTGCGGAAGGATCATTATTGAATCCATAGGATGTTGCTGGCCTTGCAAAAAGGTATTGTGCACTCCGACTATTCAAACCCCATGTGAACTTATTGTAGGCTTCAGATTTTAACAAGTCTGTTGTCTATGTTTTCATCACTGCACACTGTATATTGAATGTATAATGGTTGGCAAAATATATAATACAACTTTCAACAATGGATCTCTTGGTTCTC
>OTU_2225	AAGTCGTAACAAGGTTTCCGTAGGTGAACCTGCGGAAGGATCATTCACGATGAAGTGTGTATGGCACTTTTTCAAAAATCCCATATCCACCTTGTGTGCAACGTTCGAAGGATCTTTTTTCGCTTCGCGTGAAGGAAGCCTTACAATTTTAACCTGCGCTTGAACTAGTTTGTCTGAATACAATCGTACGACGAATTGACCTAATTCGAAAACACAACTTTCAACAACGGATCTCTTGGCTCTC
>OTU_2226	AAGTCGTAACAAGGTCTCCGTTGGTGAACCAGCGGAGGGATCATTAAAGAGTTGCAAAACTCCCTAAACCATTGTGAACATACCTTCAACGTTGCTTCGGCGGGCGGCCCGGGTCCGCCCGGTGCCCCCTGGCCCCCTCGCGGGGCGCCCGCCGGAGGAAACCCAACTCTTGATACATTATGGCCTCTCTGAGTCTTCTGTACTGAATAAGTCAAAACTTTCAACAACGGATCTCTTGGTTCTG
>OTU_2227	AAGTCGTAACAAGGTCTCCGTTGGTGAACCAGCGGAGGGATCATTACAGAGTTGCAAAACTCCCTAAACCATTGTGAACGTTACCTTCAAACCGTTGCTTCGGCGGGCGGCCCGGGTCCGCCCGGTGCCCCTCGGCCCTCGCGGGCGCCCGCCGGAGGTAAACCAAACTATTGCATTGTACGGCCTCTCTGAGTCTTCTGTACTGAATAAGTCAAAACTTTCAACAACGGATCTCTTGGTTCTG
>OTU_2229	AAGTCGTAACAAGGTCTCCGTTGGTGAACCAGCGGAGGGATCATTACAGAGTTGCAAAACTCCCAAACCATTGTGAACATACCCAAAACCGTTGCTTCGGCGGGCGGCCCGGGTCCGCCCGGTGCCCCCTGGCCCCCTTGCGGGGCGCCCGCCGGAGGAAAACCCAACTCTTGATTATTATGGCCTCTCTGAGTCTTCTGTACTGAATAAGTCAAAACTTTCAACAACGGATCTCTTGGTTCTG
>OTU_223	AAGTCGTAACAAGGTTTCCGTAGGTGAACCTGCGGAAGGATCATTAACAACGTATCCTAAACGTAAAAAACCCCCCTGTGAACTTTCATAACCCGAGCTTGCTAGGCCCGCGAAATTCATGTTGACCAGCTCTTTGAGTCAGGGATATCCGAACTAGTCGTGTTCCGTGAAGCAAGAGCGGTGAGGCAAGTGACCGGTACCCCTAAGCAATCAATGTTCTGTCAGTGTCGTTGATTGTGTAAGGGTGGCGCAGTAAACGATCGCTGGAGGCCACCACGGCCGGCGACTGGGTCAGCGAGCTCTGCTCCTTAATAACCCCACCTAAGGATTAGCTCGGCGAAAGCTTGAGCACCAAAAACTAATACGACTGTTAACAATGGATATCTTGGTTCTC
>OTU_2230	AAGTCGTAACAAGGTTTCCGTAGGTGAACCTGCGGAAGGATCATTCATAATTGAGTGTTTTATGGCACTCTTTAAAAAAATCCATATCCACCTTGTGTGCAACGTTATCTCTCAGCGTCGGTTCAGGTTCGCCTGGCCCTGCTGAGGGATTCTACATCAACTCTTAATTTAACAAATTTGTCTGAACACTATTTCGAATAACTAATTCAAAATACAACTTTCAACAACGGATCTCTTGGCTCTC
>OTU_2231	AAGTCGTAACAAGGTCTCCGTTGGTGAACCAGCGGAGGGATCATTACCGAGTTTACAAACTCCCAACCCTATGTGAACCTTACCTATCGTTGCTTCGGCGGGCTTTAGCCCCCGCGCCGCTCGCCGGCGCCGGGAAACAGGCGCCCGCCGGAGACCCCAAACCCAATGTTTTCATGCAGTATTCTTCTGAGTGGCAAACGCAAAAAATAAATCAAAACTTTTAACAACGGATCTCTTGGCTCTG
>OTU_2232	AATAAAAGTCGTAACAAGGTCTCCGTTGGTGAACCAGCGGAGGGATCATTACCAGAGTGCCCTAGGCTCTCCAACCCATTGTGAACATACCTATCGTTCCCTCGGCGGGCTCAGCGCGCGGTGCCTCCGGGCTCCGGGCGTCCGCCGGGGACAACCAAACTCTGATTTTATTGTGAATCTCTGAGGGGCGAAAGCCCGAAAACAAAATGAATCAAAACTTTCAACAACGGATCTCTTGGCTCTG
>OTU_2235	AAGTCGTAACAAGGTCTCCGTTGGTGAACCAGCGGAGGGATCATTACCGAGTTATACAACTCATCAACCCTGTGAACGTTACCTATCCCGTTGCTTcggcgggcggcccgggccccgtgcccggcgccccccggcccctcgcgggcgcccgccggAGGTAAACCAAACCCTTGAATTGTATGGCCTCTCTGAGTCTTCTGTACTGAATAAGTCAAAACTTTCAACAACGGATCTCTTGGTTCTG
>OTU_2236	AAGTCGTAACAAGGTCTCCGTTGGTGAACCAGCGGAGGGATCATTACAGAGTTGCAAAACTCCCAAACCATTGTGAACGTTACCTTCAAACCGTTGCTTCGGCGGGCGGGGCCACAGCGccccccccgggccccccAGCGGGGCCGCCCGCCGGAGGATACCCAAACTCTTGATACTGTATGGCCTCTCTGAGTCTTCTGTACTGAATAAGTCAAAACTTTCAACAACGGATCTCTTGGTTCTG
>OTU_2237	AAGTCGTAACAAGGTCTCCGTTGGTGAACCAGCGGAGGGATCATTAAAGAGTTGCAAAACTCCCAAACCATTGTGGACCTACCTTACAACCGTTGCTTCGGCGGGAGGCCCGGGTCCGCCCGGTGCCCCCTGGCCCCCTAGCGGGGCGCCCGCCGGAGGAAACCCAACTCTTGATTATTATGGCCTCTCTGAGTCTTCTGTACTGAATAAGTCAAAACTTTCAACAACGGATCTCTTGGTTCTG
>OTU_2238	AAGTCGTAACAAGGTTTCCGTAGGTGAACCTGCGGAAGGATCATTACCGAAGTACAGGCCCTCTCGAGGGCTAAACTTCCACCCTTTGTTTATTATACTATGTTGCTTTGGCGGATCGCCCTTGGGCCACCGGCTTCGGCTGGTGCGTGTCCGCCAGAGACCTCAAACCCAAACCATTATACGTAATTGTCTGAAAACAAGTTTAAATTATTAAAACTTTCAACAACGGATCTCTTGGCTCTG
>OTU_2239	AAGTCGTAACAAGGTCTCCGTTGGTGAACCAGCGGAGGGATCATTACCGAGTTTACAACTCCCAAACCCCTGTGAACATACCTAACGTTGCCTCGGCGGGAAAGCCCCGGGCGCTGGCGCAAGCCTCGCACCGGTACCAGGCGCCCGCCGGAGGACCCAAACCAAACTCTTGTATTCTAAAGAATCTTCTGAGTAACCATAAGCAATAAATTAAAACTTTCAACAACGGATCTCTTGGTTCTG
>OTU_2240	AAGTCGTAACAAGGTTTCCGTAGGTGAACCTGCGGAAGGATCATTACTGCTTGCTCATGGCCGCCTGGGGTTCTGCCCCGGTGCGGTACGGCAACATCACCCTTGTCTATATGTACCCTTTGTTATTTCCCTCGGCGGGGTCATACCCGTCGATGGGAACATCATAAACCCTTGTATCTAAGCATCAAACCTCTGAAACGAATGAAATAATCACAACTTTCAACAATGGATCTCTTGGTTCTG
>OTU_2241	AAGTCGTAACAAGGTCTCCGTAGGTGAACCTGCGGAGGGATCATTACAGAGTTCGTGCCCTCGCGGGTAGATCTCCCACCCTGTGTTATTACCACCCTGTTGCTTTGGCGGGCCGCTAGGCTCGTGCCTAGCCACCGGCTCCGGCTGGTGAGCGCCCGCCAGAGGCCCTCAAAACCCTCTAATCAGTGTCGTCCGAGTACTATACAATCGTTAAAACTTTCAACAACGGATCTCTTGGTTCTG
>OTU_2242	AAGTCGTAACAAGGTTTCCGTAGGTGAACCTGCGGAAGGATCATTACTGAGTGCGGGCCCTCTGGGTCCAACCTCCCACCCGTGTCTCCTGTACCTTGTTGCTtcggcgggcccgcctgcccggcggccggggcccccccggcctgcgcccgccgAAGACACTACCGAACGCTGTATGAAGAGTGCGGTCTGAGCGAATAGCGAAATTAGTTAAAACTTTCAACAACGGATCTCTTGGTTCCG
>OTU_2243	AAGTCGTAACAAGGTCTCCGTAGGTGAACCTGCGGAGGGATCATTACACAAAGATATGAAGGCGGGGTGCTGGCAACAGCGCTCTGCTGAATTATTTTTCACCCATGTCTTTTGCGCACTTTTTGTTTCCTGGGCGAGTTCGCTCGCCACCAGGACCCCCATATAAACCTTTTTGTTTATGCAATCAGCGTCAGTACAATAATGAATTTATTAAAACTTTCAACAACGGATCTCTTGGTTCTG
>OTU_2244	AAGTCGTAACAAGGTCTCCGTTGGTGAACCAGCGGAGGGATCATTACAGAGTTGCAAAACTCCCAACCATTGTGAATCTACCTCACCGTTGCTTCGGCGGGTGGCTCGGCAACACCGGGCCGCGCCGGCCCCGCTTAGGGAGCCGACAACCCGTCAGAGGATCGAAACCATCAGTCATCATTGGCCTCTCTGAGTAACTTATACAATAAGTCAAAACTTTCAACAACGGATCTCTTGGTTCTG
>OTU_2245	AAGTCGTAACAAGGTTTCCGTAGGTGAACCTGCGGAAGGATCATTATTGAATTTACATGGGTTGTGCTGGTTTTACAAGTGCACGCCTATATCAATTTCCATACACCTGTGCACCTTTGTAGACTTGGAGGGAGAAATCCTTTCTGGTCTGCGTTTTATACACTCTTTTTTATTACATTGAATGTTTCTTGTCTTTTGACAAACAAATCTATACAACTTTAAGCAACGGATCTCTTGGCTCTC
>OTU_2246	AAGTCGTAACAAGGTTTCCGTAGGTGAACCTGCGGAAGGATCATTAACAAGATATGATGTTGGTGATGGGGGGAGGGTTTTGGGAGTCTGATTAATTTTGGACGACCAGACACCACGACCCACACTAAACGTATTGTTCGGGGCAGCAATGCCCTGTGACACATATTTACACGTTTGTTATGTTTGTCAAATTTATGGTTGGCTAAACTTATACAACTTTTAACAATGGATCTCTTGGCTCTT
>OTU_2247	AAGTCGTAACAAGGTCTCCGTAGGTGAACCTGCGGAGGGATCATTACACAATTAAAATATGAAGGCCCTTCAAACCGGCTGGATTATTTTTATTCACCCTTGTCTTTTGCGCACTTGTTGTTTCCTGGGCGGGTTCGCTCGCCACCAGGACCACATTATAAACCTTTTTTTGTTAATGCAATCAGCGTCAGTATAACAAATGTAAATCATTTACAACTTTCAACAACGGATCTCTTGGTTCTG
>OTU_2248	AAGTCGTAACAAGGTTTCCGTAGGTGAACCTGCGGAAGGATCATTACAAGGTACCTAGCCTACCCGGCTAGAACCTCCAACCACTGTGTACCAAACTTTTGTTGCCTCGGCGGGCTGGGTGCCCACCAGCACCCCCCTTAGGGGAGTCGCCCGCCGATGGACCTTTAAAACTTCTTCGTAGATGAACGTCTGATTTAATCTTAAAAAGAAATACAACTTTTAACAATGGATCTCTTGGCTCTG
>OTU_2249	AAGTCGTAACAAGGTCTCCGTTGGTGAACCAGCGGAGGGATCATTACAGAAGGTCTTAGCACCTGAAACCCATTGTGAACTCTCTTCTTTGCTGCCTCGGCGGGCAATCCCAGGGCGGGATTCCAGGCCCCGTTTTAGGGGCGTCCGCCGGCGGTGCACCTCTCTAGCTCTTGTCTGCGACGGGCTTCTGAGTGGTCTAAAAAAACAAAGTCAAAACTTTCAACAACGGATCTCTTGGCTCTG
>OTU_225	AAGTCGTAACAAGGTTTCCGTAGGTGAACCTGCGGAAGGATCATTAACACGTATCCAACGTTAAACCCCCCTGTGAACCTTCATTGTGCTCCCACGCTTTGTTAGAAAGTGGCAATCCCTGGTAAATCATCGCCGAACAGTTTTGATTCAGGGACTTCTGCGAAGAGGGTGAATGAGGCGAGGCAATGGACCTGGCATTCCTCTGCTTGTTGGTGTCTGAAAGTGTCACTAACTCTGTACGAATGGCGCAGTCACGTTCGCTGGAGGCCGACACGGCCGGCGACCGGGTCCCTGAGCTCTGCTCCCTAATAACCTTTGCATGAAAACGGGCCTGCGCTTAATTGTGCGGCCACCAAACTCGAACAACTGTTAACAATGGATATCTTGGTTCTC
>OTU_2250	AAGTCGTAACAAGGTCTCCGTTGGTGAACCAGCGGAGGGATCATTACCGAGTTTACAACTCCCAAACCCTTATGTGAACCGTACCTATCGTTGCTTCGGCGGGAACGCCCCGGCGCCCTGCGCCCGGATCCAGGCGCCCGCCGGAGACCACAAACTCTTCTGTATTTTCAGCACCAGTATTTTTCTCTGAGTGGCAAACGCAAAAATAAATCAAAACTTTTAACAACGGATCTCTTGGCTCTG
>OTU_2251	AAGTCGTAACAAGGTCTCCGTAGGTGAACCTGCGGAGGGATCATTACACAAATATGAAGGCGGGCTGGAACCTCTCGGGGTTACAGCCTTGCTGAATTATTCACCCTTGTCTTTTGCGTACTTCTTGTTTCCTTGGTGGGTTCGCCCACCACTAGGACAAACATAAACCTTTTGTAATTGCAATCAGCGTCAGTAACAAATTAATAATTACAACTTTCAACAACGGATCTCTTGGTTCTGGCA
>OTU_2252	AAGTCGTAACAAGGTTTCCGTAGGTGAACCTGCGGAAGGATCATTACTGCTTGCTCATGGCCGTCCTCGGGGGCAACCCCTTGGGCGGTACGGCAACAACACCCTTGTCTATGTATACCTTTTGTTATTTCCCTCGGCGGGGTCACCCGCCGCTGGGGACACCAAACCCTCTTGCATGAAGCATCAAACCTTCTGAACAAACCTAAATTATTACAACTTTCAACAATGGATCTCTTGGTTCTG
>OTU_2253	AAGTCGTAACAAGGTTTTCGTAGGTGAACCTGCGGAAGGATCATTAGTGAAGTTATAAGGGTGCTTTCATTAGGCCCGACTACACTTATTACACACTGTGCACTTGTTTATAAATTGATGGCTTGACTTCACAATCGAGCTGTCTCTTTATTTCATACACTTGTTAATGGAAAGAAGTTGATAGGATGTAATCAAATTGATTAAACGAAAGTACAACTTTCAGCAACGGATGTCTTGGCTCTC
>OTU_2254	AAGTCGTAACAAGGTTTCCGTAGGTGAACCTGCGGAAGGATCATTACTGCTTGCTCATGGCCGGCTTGGTGGGGAAACCCGCCAGACGGTACGGCAACACACCCTTGACTATCATACCCATTGTTATTTCCCTCGGTGGGGCAACCCGCCGCTGGGGACACCGTAAATCCTCTTGTATAAAGCATAAACTTCTGAAACAAACCTAAAATATCACAACTTTCAACAATGGATCTCTTGGTTCTG
>OTU_2255	AAGTCGTAACAAGGTCTCCGTAGGTGAACCTGCGGAGGGATCATTACAGAGTTCTCGCCCTCGCGGGTAGATCTCCCACCCACTGTTATTGCTACTGTGTTGCTTTGGCGGGCTGCTAGGCCCAGCCTGGCCGCCGGCTCCGGCTGGCGCGCGCCCGCCAGAGGCCCGATTAATTCTGATTGTCAGTGTCGTCTGAGTACTATATAATAGTTAAAACTTTCAACAACGGATCTCTTGGTTCTG
>OTU_2256	AAGTCGTAACAAGGTTTCCGTAGGTGAACCTGCGGAAGGATCATTCATAATTGAGTGTTTTATGGCACTCTTTAAAAAAATCCATATCCACCTTGTGTGCAACGTTTTTGAACTCTCTGGCATTAAAAAGCCAAGAGGGTTTGATTAACTTAACACCTTTAAAGCAGTTTGTCTGAATATCTATTTCTGAATAAACATAATTCAAAAATACAACTTTCAACAACGGATCTCTTGGCTCTCGCA
>OTU_2257	AAGTCGTAACAAGGTTTCCGTAGGTGAACCTGCGGAAGGATCATTAACACTAATGAAATCCAAAACCTTTTGGATCAACCCAACCTTAGCGAACCGTTCGTTTTTTCCCTTTGCCATTTTATTAAACGCAAAACAAATCTGATGTAAAGTGTCTGATTCTTATTCCCGTTTACCCTCTCAAGGGTCAGCTGGAATCAAAAATCTAACGCAATACAACTCTTAACAACGGATATCTTGGCTCTC
>OTU_2258	AAGTCGTAACAAGGTCTCCGTAGGTGAACCTGCGGAGGGATCATTACAGAGTTCGCGCCCTCCCCGGGTAGATCTCCCACCCTGTGTTATCGCTACCGCGTTGCTTTGGCGGGCCGCTAGGCTCAGGCCAGCCACCGGCCCCGGCCGGTGCGTGCCCGCCAGAGACCCCCCTATCCTGACCATGCGTGTCGTCTGAGCACTATACAATAGTTAAAACTTTCAACAACGGATCTCTTGGTTCTG
>OTU_2259	AAGTCGTAACAAGGTCTCCGTTGGTGAACCAGCGGAGGGATCATTAATGAGTTGCAAAACTCCAACCATCGCGAATGTAACCTATTGCAGTTTCTTCGGCGGGTGGCCCTGAGATGGGCTGCGCACCCCGTGGGTCACGGGGGGTATACCCGCCGGAGTCGTACAAACTCTTGTATTTGTTGGCATCTCTGAGTAACTTTTACAATAAGTTAAAACTTTCAACAACGGATCTCTTGGTTCTGG
>OTU_226	AAGTCGTAACAAGGTTTCCGTAGGTGAACCTGCGGAAGGATCATTCACAATTTTTGCACGAGTGGGCATTCAATGTCTACTTCATGCGATAGTTAATCTGAGACCCGTATTCAGCTTAATCCCAAGCGGAAGATCTGGATATGTGGTCCTCAACCTTGTGTGCATTGTACTGTTTCGTCTTTCCAACTCATGTCTCGTTTTCTCTTCTTTTTCTCCTCTCCCTCTCAATTATGGGAAGTGGGGGGTGGATTTGGTAGGAGAACCAAATGTGGTGTTTGGAAGGAGGAGGCAACCATAATACAAAACCTACAAGTTATTCATTATTGACTGAAAAATATTATTATGAACTATCATAAGAAAATACAACTTTCAACAACGGATCTCTTGGCTCTC
>OTU_2260	AAGTCGTAACAAGGTCTCCGTAGGTGAACCTGCGGAGGGATCATTACAGAGTTCATGCCCTACCGGGTAGATCTCCCACCCTATGTTATTATTACTTTGTTGCTTTGGCGGGCCGTTAGGCTCCGGCCCGACTACCGGCCCCGGCTGGTAAGCGCCCGCCAGAGGACCCAAAACCCTGAATATTAGTGTCGTCTGAGTACTATATAATAGTTAAAACTTTCAACAACGGATCTCTTGGTTCTG
>OTU_2261	AAGTCGTAACAAGGTCTCCGTTGGTGAACCAGCGGAGGGATCATTACAGAGTTGCAAAACTCCCAAACCATTGTGAACGTCACCATTAATCGTTGCTTCGGCGGGTGGTTCCCACTCGGGTACCACATCTCCCCCTCGGGGTAGGTAGCCCGCCGGAGGCGTCTCAACTCTCGTTTTTAATTGGCATCTCTGAGTAACTTATAAAATAAGTCAAAACTTTCAACAACGGATCTCTTGGTTCTG
>OTU_2262	AAGTCGTAACAAGGTCTCCGTTGGTGAACCAGCGGAGGGATCATTACAGAGTTGCAAAACTCCCAACCATTGTGAACCTACCTCACCGTTGCTTCGGCGGGTGGCCCCCTCCCCGGGGCCGCGCCGGCCCCCTCCCCGGGGTCCGGGAACCCGTCAGAGGCCCGCAGCTCTTCGTCATCATTGGCCTCTCTGAGTAACTTATACAATAAGTCAAAACTTTCAACAACGGATCTCTTGGTTCTG
>OTU_2263	AAGTCGTAACAAGGTCTCCGTTGGTGAACCAGCGGAGGGATCATTACAAAACGAGTGCTTCGGCTCTCCAACCCATTGTGAACATACCTATCGTTCCCTCGGCGGGCTCAGCGCGCGGCCGGCCTCCGGGCCACCGGGCGTCCGCCGGGGACAACCAAACCCGAATTTTTCGTGTATATCTGAGGGGCGAAAGCCCGAAAACAAAATGAATCAAAACTTTCAACAACGGATCTCTTGGTTCTG
>OTU_2264	AAGTCGTAACAAGGTCTCCGTAGGTGAACCTGCGGAGGGATCATTACAGAGTTCATGCCCGCAAGGGTAGATCTCCACCCTATGTTATTGTTACCATTGTTGCTTTGGCGGGCCGTCAGGCCTCGGCCCGGCTACCGGCTTCGGCTGGTAAGCGCCCGCCAGAGGAAAATCAAACCATGAATTTAGTGTCGTCAGAGTACTATATAATAGTTAAAACTTTCAACAACGGATCTCTTGGTTCTG
>OTU_2265	AAGTCGTAACAAGGTCTCCGTTGGTGAACCAGCGGAGGGATCATTACAGAGTTGCAAAACTCCCTAAACCATTGTGAACGTTACCTTCAAACCGTTGCTtcggcgggcgggcgcccagcgcgccccccggccccctcgcggggcgcccgccggAGGTACCCCAAACCATTTGATATTTATGGCCTCTCTGAGTCTTCTGTACTGAATAAGTCAAAACTTTCAACAACGGATCTCTTGGTTCTG
>OTU_2266	AAGTCGTAACAAGGTCTCCGTTGGTGAACCAGCGGAGGGATCATTACTGAGTTGCATTTTTTGCTCTCTTACCCTTTGTGAACCTACCTCGTATGCTATACGTTGCTTCCGGTCCGGCCGCTTGGCTGGACCGGGTTGGGCAATGCATAGCTCTTTTCTCTTTATTCTCCAGTTATGGTTGTATTGCTGAGTGGCATAAAACTAAACGTTTTAAAACTTTCAACAACGGATCTCTTGGTTCTG
>OTU_2267	AAGTCGTAACAAGGTTTCCGTAGGTGAACCTGCGGAAGGATCATTACAAATCCATCCACGTCTCATACCCGAGACCACGTTGAAATGTTCCCCAGAGCCTCTGCCCTCTGGGCCAGCTTCGGCCGGCCCCTTGGATCAGCATGCTCTGGGCTGTTAAACTAGTCATCTCTGTTGCTCAAATGTATCTTGATTTCAATCAAACGAAAACTTGTACAACTTATAACAATGGATCTCTAGGCTCTT
>OTU_2268	AAGTCGTAACAAGGTCTCCGTTGGTGAACCAGCGGAGGGATCATTAAAGAGTTGCAAAACTCCCTAAACCATTGTGAACATACCTTCAACGTTGCTTCGGCGGGTTGGCTCCGGGTCTCCCGCGCCCCCCGGCCCCTCGCGGGCGCCCGCCGGAGGTACCCCAAACCATTGATACTTTATGGCCTCTCTGAGTCTTCTGTACTGAATAAGTCAAAACTTTCAACAACGGATCTCTTGGTTCTG
>OTU_2269	AAGTCGTAACAAGGTTTCCGTAGGTGAACCTGCGGAAGGATCATTATCAATTTAACAGTTCGTGGGATAGACGCTCGTAAGGCTACCCTTCCCACGCTGTTTCAACCCTTTGTCTTTTGCGTACTGTATGTTTCCTCGGCGGGTTCGCCCGCCGATAGGACACTTCAAAACCTTTTGTAATTGCAATCAGCGTCAGAAAAACTATAATAGTTACAACTTTCAACAACGGATCTCTTGGTTCTG
>OTU_227	AAGTCGTAACAAGGTTTCCGTAGGTGAACCTGCGGAAGGATCATTAACACGTATCCAACGTTAAACAACCCTGTGAACTTTCAGACGCTCTTGTAGCCCAGGAGGAACAGCAATCCCGGTAAATCAATGGCGGAAAAGTTTTGATTCGGGACCTCTGTCCAAAAGGTATCAAGTTACAATCGAGCTAGGAGCAGTGGCATGGTTTCCCTAAGCAGTGCAGAAGGATCCACTGAGTAAGGATAACGCATCACGGTTGCCAGAGGTCGATCACCGGCCGGCAGACATGTCACAGGGCTTTACGCCCCTTCATTCACCCCTTGCCTAATCAAGCCCCGCGGAAACGCCGGGCAAAAAAATCTGAACAACTGTTAACAATGGATATCTTGGTTCTC
>OTU_2270	AAGTCGTAACAAGGTCTCCGTTGGTGAACCAGCGGAGGGATCATTACAGAGTTGCAAAACTCCCTAAACCATTGTGAACGTTACCTAAACAGTTGCTTCGGCGGGTGGCGCGAGGGCCCCTTCACGGGGGCCGGAGCGCCCTAGACAGCCCGCCGGAGGTACTCAAACTCTTGTTTAATAAGGCCTCTCTGAGTATTGTACTTAAATAAGTCAAAACTTTCAACAACGGATCTCTTGGTTCTG
>OTU_2271	AAGTCGTAACAAGGTCTCCGTTGGTGAACCAGCGGAGGGATCATTACAGAGTTGCAAAACTCCCTAAACCATTGTGAACGTTACCTAAACCGTTGCTTCGGCGGGCGGCCACGGGCTCACCCCCGCGGCCCCCGGCCCCCTCAAGGGCGCCCGCCGGAGGCTCTAACTCTTGAACTTTTATGGCCTCTCTGAGTCTTTGTACTTAATAAGTCAAAACTTTCAACAACGGATCTCTTGGTTCTG
>OTU_2272	AAGTCGTAACAAGGTCTCCGTTGGTGAACCAGCGGAGGGATCATTACTGAGTCTACGAACTCCCAACCATTGTGAACATACCCTACGTTGCTTCGGCGGTCACGCCCCGGGACGCGCGCTCCGGCGCCGTGCTCCCGGGCCAAGGCGTCCGCCGGAGGCCCCAAACTACACTGCAACTATGGATCTATCTGAGTGGCATAAGCAAATAAATCAAAACTTTCAGCAACGGATCTCTTGGTTCTG
>OTU_2273	AAGTCGTAACAAGGTAACCGTAGGTGAACCTGCGGTTGGATCATTACTGATTTTGCCGAGGCCGGTCGAGTCCCTCGGGACTCCCGGCCGAAGCGATACACCACTTGTGCACTATATCGTCTTTTGGGTTGGGGAGCTGCCTGCTCGCAGGCGGTAACCTAGCCCAGCCGTATGAACCACTTAATCTTTTGTCTGAAAATCTAGTAATAGAAACAACTTTTGACAACGGATCTCTTGGCTCTC
>OTU_2275	AAGTCGTAACAAGGTCTCCGTTGGTGAACCAGCGGAGGGATCATTACAGAGTTGCAAAACTCCCAAACCATTGTGAACGTTACCTTCAAACCGTTGCTTCGGCGGGCCGGCTCTACGGCCGCGCGGGTcccccccccGGGGGAGCGCCCGCCGGAGGTATCTAAACCAGACGTTTTTGTATGGCCTCTCTGAGCAACTGTACCGAATAAGTCAAAACTTTCAACAACGGATCTCTTGGTTCTG
>OTU_2277	AAGTCGTAACAAGGTTTCCGTAGGTGAACCTGCGGAAGGATCATTAGTGAATTAAACATGCTTGGTGTCTTCGCTTCGGCAAGGCCCTTGCTTAACTCACATCCCAACACCTGTGAACTGTAAGGCGCATGACTAGGTTCGCCCAAGTCATCGTCTGCCCTTTTTAACAAACAATTAATGTAACAAACGTAGTCTTATTATAACCTAATAAAACTTTCAACAACGGATCTCTTGGCTCTCGCA
>OTU_2278	AAGTCGTAACAAGGTTTCCGTAGGTGAACCTGCGGAAGGATCATTACAGTGTTCCCTGCCCTTCGGGGTAGGATCGCCACCCTTGATTATTTTATGAGTGTTGCTTTGGCGGGCCTCGCGGCCTGGCCGCGCCCCGGCTTCGGCGGGGGAGCGCCCGCCAGAGGATCTTCCAAACCTGATTATTAGTGTCGTCTGAGTACTATATAATAGTTAAAACTTTCAACAACGGATCTCTTGGTTCTG
>OTU_2279	AAGTCGTAACAAGGTCTCCGTTGGTGAACCAGCGGAGGGATCATTAAAGAGTTGCAAAACTCCCAAACCATTGTGAACGTTACCTTTACCGTTGCTTCGGCGGGCGGCCCGGGTCCTGCCCGGCGCCCCTCGGCCCTCGCGGGCGCCCGCCGGAGGTAAACCAAACTCTTGAATTTACATGGCCTCTCTGAGTCTTCTGTACTGAATAAGTCAAAACTTTCAACAACGGATCTCTTGGTTCTG
>OTU_228	AAGTCGTAACAAGGTTTCCGTAGGTGAACCTGCGGAAGGATCATTAACAACGTATCCTAAACGTAAAAAACCCCCCTGTGAACTTTCATAACCCGAGCTTGCTAGGCGTAAATCATTGTTGACCAGCTCTTTGAGTCAGGGATATCCGAACTAGTCGTGTGGATTAAGTTCCGTGAAGCAAGAGCGGTGAGGCAAGTGACCCGGTACCCCCAAGCAATCAATTTTCTGTCAGTGTCGTTGATTGTGTAAGGGTGGCGCAGTAAATGATCGCTGGAGGCCGGCGACTGGGTCAGCGAGCTCTGCTCCTTAATAACCCCACCTAAGGATTAGCTCGGCGAAAGCTTGAGCACCAAAAACTAATACGACTGTTAACAATGGATATCTTGGTTCTC
>OTU_2280	AAGTCGTAACAAGGTTTCCGTAGGTGAACCTGCGGAAGGATCATTACCGAGTGCGGGCTCCAACGAGCCCAACCTCCCACCCGTGTTTACCGTGACCGCGTTGCCTCGGCGGGCCCACTGGGGCCTGGCCCCGGTCGCCGGGGGGCCCGCGCCCGCCGAAGCACCCTGAAACCCTGTCTGAATAGTGAGTCTGAGTGAGGGATTGAATCATTAAAACTTTCAACAACGGATCTCTTGGTTCCG
>OTU_2281	AAAGTCGTAACAAGGTTTCCGTAGGTGAACCTGCGGAAGGATCATTCATAATCAAGTGTTTTTATGGCACTTTAAATCCATATCCACCTTGTGTGCAATGTCATCTCACTGGGGTCACGTTTGTAAAATCTCGTGGTCCTTTTGGGATTTATATCTACTCAGAACTTTAGTCATTTTGTCTGAAACATATTATGAATAACTTAATTCAAAATACAACTTTCAACAACGGATCTCTTGGCTCTC
>OTU_2282	AAGTCGTGACAAGGTCTCCGTTGGTGAACCAGCGGAGGGATCATTACAGAGTTGCAAAACTCCCAACCATTGTGAACCTACCTCACCGTTGCTTCGGCGGGTGGCCCGGCTTTGCCGGGCCGCGTCGGCTCTGCTTGCGGAGCCGGCAACCCGTCAGAAGACCGAAACCATTAGTTATCATTGGCCTCTCTGAGTAACTTATACAATAAGTCAAAACTTTCAACAACGGTTCTCTTGGTTCTG
>OTU_2284	AAGTCGTAACAAGGTATCCGTAGGTGAACCTGCGGATGGATCATTAGAAAGTGTTGATGCGCGGCCCAGCTGCGTGTCTATCACCCACTCTGTGCACTGTATTGTACCCTGGCGGGAGTCTGCGCAAGCGGGCTCCCGTCGAAGGGCGGCTCCTTTGGGCTGCCCGACCACCAACACCTAAACATAGCCTGAATCTAAAGAACTAATGTTAAACAACTTTTGACAACGGATCTCTTGGCTCTC
>OTU_2285	AAGTCGTAACAAGGTCTCCGTAGGTGAACCTGCGGAGGGATCATTACAAGTGACCCCCGGCTCCGGCCGGGGATGTTCATAACCCTTTGTTGTCCGACTCTGTTGCCTCCGGGGCGACCCTGCCTTTTCACGGGCGGGGGCCCCGGGTGGACACATCAAAACTCTTGCGTAACTTTGCAGTCTGAGTAAATTTAATTAATAAATTAATAATTACAACTTTCAACAACGGATCTCTTGGTTCTG
>OTU_2286	AAGTCGTAACAAGGTCTCCGTTGGTGAACCAGCGGAGGGATCATTACAGAGTTGCAAAACTCCCTAAACCATTGTGAACGTTACCTTCAAACCGTTGCTTCGGCGGGTTGGCTCCGGGTCTCCCGGGGCCCCCGGCCCTACTCGGGCGCCCGCCGGAGGTATCTAACTCTTGATTATTATGGCCTCTCTGAGTCTTCTGTACTGAATAAGTCAAAACTTTCAACAACGGATCTCTTGGTTCTG
>OTU_2287	AAGTCGTAACAAGGTCTCCGTTGGTGAACCAGCGGAGGGATCATTACAGAGTTGCAAAACTCCCTTACCACCATCGTGAACAGACCCCGAAACAGTTGCTTCGGCGGGAGGCAGTCCCCCCCTTCACCGGGGGCGGCCGGCCGCGACGCCCGCCGGAGGTACCCAAACTCTTTGTTTTATAGGCCTCTCTGAGTCTTTGTACTGAATAAGTCAAAACTTTCAACAACGGATCTCTTGGTTCTG
>OTU_229	AAGTCGTAACAAGGTTTCCGTAGGTGAACCTGCGGAAGGATCATTAACAACGTATCCTAAACGTAAAAAACCCCCCCTGTGAACTTTCATAACCCGAGCTTGCTAGGCCCGCGAAATTCAGCAATCCCTGGTAAATCATTGTTGACCAGCTCTTTGAGTCAGGGATATCCGAACTAGTCGTGTGGATTAAGTTCCGTGAAGCAAGAGCGGTGAGGCAAGTGACCCGGTACCCCCAAGCAATCAATGTTCTGTCAGTGTCGTTGATTGTGTAAACGGCCGGCGACTGGGTCAGCGAGCTCTGCTCCTTAATAACCCCACCTAAGGATTAGCTCGGCGAAAGCTTGAGCACCAAAAACTAATACGACTGTTAACAATGGATATCTTGGTTCTC
>OTU_2291	AAGTCGTAACAAGGTTTCCGTAGGTGAACCTGCGGAAGGATCATTACAGAGTTGCAAAACTCCCTAAACCATTGTGAACGTTACCTAAACCGTTGCTTCGGCGGGCGGCCCGGGTCCTGCCCGGCGCCCCTCGGCCCTCGCGGGCGCCCGCCGGAGGAAAACCAAACTATTGCATTGTATGGCCTCTCTGAGTCTTCTGTACTGAATAAGTCAAAACTTTCAACAACGGATCTCTTGGTTCTG
>OTU_2292	AAGTCGTAACAAGGTCTCCGTTGGTGAACCAGCGGAGGGATCATTACAGAGTTGCAAAACTCCCTACACCATTGTGAACATACCACTGTTGCCTCGGCGGACCCGCCCCGGGCGCTCCCCCTCGCGGGGCGTGTTCCGGGCTCAGGCGGCCGCCGGGGGCTCCAAACCTCTGTTTTTATAGCGGACTTCTGAGTATCATGAGAAAATAAATCAAAACTTTCAGCAACGGATCTCTTGGCTCTG
>OTU_2294	AAGTCGTAACAAGGTCTCCGTTGGTGAACCAGCGGAGGGATCATTAAAGAGTTGCAAAACTCCCAAACCATTGTGGACCTACCTTACAACCGTTGCTTCGGCGGGCGGCCCGGGTCCTTCCCGGCGCCCCTCGGCCCTCGCGGGCGCCCGCCGGAGGTAAACCAAACTATTGCATTGTATGGCCTCTCTGAGTCTTCTGTACTGAATAAGTCAAAACTTTCAACAACGGATCTCTTGGTTCTG
>OTU_2295	AAGTCGTAACAAGGTCTCCGTTGGTGAACCAGCGGAGGGATCATTACTGAGTGTAAAAACTCCCAAACCCACTGTGAACATACCACTGTTGCTTCGGCGGATGCGCCCCGGGCGCGCCCTACAAAGGCGTGCCCCGGACCAAGGCCACCGCCGGGGGACCGAAACTCTTGTTTTCCTAAGGATTCTCTGAGTGTGATTATTAAATCAAATCAAAACTTTCAACAACGGATCTCTTGGCTCTA
>OTU_2296	AAGTCGTAACAAGGTCTCCGTTGGTGAACCAGCGGAGGGATCATTACAGAGTTGCAAAACTCCCAAAACCATTGTGAACCTTACCTTTAACCGTTGCTtcggcgggcgggccctgcgccccccgggcccccctcgcggggggcgcccgccggAGGTCTCCCAAACTCTTGATACCATGTGGCCTCTCTGAGTATTCTGTACTGAATAAGTCAAAACTTTCAACAACGGATCTCTTGGTTCTG
>OTU_2297	AAGTCGTAACAAGGTCTCCGTAGGTGAACCTGCGGAGGGATCATTACACAATATGAAAGCGGGCTGGCATCCTTCGGGGTTACAGCCTTGCTGAATTATTCACCCGTGTCTTTTGCGTACTTCTTGTTTCCTTGGTGGGTTCGCCCACCATAGGACAAACCATAAACCTTTTGTAATTGCAATCAGCGTCAGaaaaaaaaaaTTAATAATTACAACTTTTAACAACGGATCTCTTGGTTCTG
>OTU_2298	AAGTCGTAACAAGGTCTCCGTTGGTGAACCAGCGGAGGGATCATTACCGAGTTTACAACTCCCAACCCTTCTGTGAACATACCTATCGTTGCTTCGGCGGAACGCCCCGGCGCCCTGAGCCCGGAACCAGGCGCCCGCCGGAGACCACAAACTCTTCTGTATTTTCAGCACCAGTATTTTTCCTCTGAGTGGCAAACGCAAAAAATCAATCAAAACTTTTAACAACGGATCTCTTGGCTCTG
>OTU_2299	AAGTCGTAACAAGGTAACCGTAGGTGAACCTGCGGTTGGATCATTAACGAAAGGACCCGCGTCCTACAACACTGTGTGCACTGTTTACTGTCTCTGGCGGGGCTCCGGTCCCGCCGAAGGGTTCTGGCGGCTGTCTCCCTCTCAAAGATGCCGCAACTACCAACTTTTCCGTCTGATCTTTTTTCTGCCTCCGGGCGGAGGAATTCGAAAAACAACTTTTGACAACGGATCTCTTGGCTCTC
>OTU_23	AAGTCGTAACAAGGTTTCCGTAGGTGAACCTGCGGAAGGATCATTAGTGAACGCCCTTCATGGGCTTAAACTATTCCAAACCTCTGTGAACCGTGCCCTTCGGGGCTAATTTTACAAACATGGTGTAATGAACGTCATAACTTTAACAAAACAAAACTTTCAACAACGGATCTCTTGGCTCTCGCATCGATGAAGAACGCAAACAACGGTTCAAGGTCTTGGTCATTTAGAGGAAGTAAAAGTCGTAACAAGGTTTCCGTAGGTGAACCTGCGGAAGGATCATTACCTAGAGTTGTAGGCTTTGCCTACCATCTCTTACCCATGTCTTTTGAGTACCTTCGTTTCCTCGGTGGGTTCGCCCGCCGACTGGACAAAACTTAAACCCTTTGTAATTGAAAT…
>OTU_230	AAGTCGTAACAAGGTTTCCGTAGGTGAACCTGCGGAAGGATCATTACAACGTATCCACGTATAAACAAACGCGAACGTCCCGTTAGGGGTAAAAACCAGGGGAGCCTGGCATGAAGTTATTCGGCTGAACTGCTAATTATGTGCTTCGTCGATGGAGTTGCTCTCGCAGCAACTGAAGCACGAGTTCGGCCCGGTTAATCCGGACTTCGTTTACCTCTAACGTGTATCAACCATCGGTTAATATGTACCTTTATTAACCCTTTGTAAACTTCGAACTGAACTTGTAATTTCTGCGGTTGTCCTTGTTGGCTTCGGTCACGGACGGCATAACGCAGTCTTTACTATATTACGAAATTAAGAACAACTCTTAACAACGGATATCTTGGTTCTC
>OTU_2300	AAGTCGTAACAAGGTTTCCGTAGGTGAACCTGCGGAAGGATCATTACCGAAGTACAGGCCCTCTCGAGGGCTACACTTCCACCCTTTGTTAACTATACTTTGTTGCTTTGGCGAGACGCCCTCGGCCACCGGCTTCGGCTGGTGAGTGCTCGCCAGAGAAAACCCAAACCCAAACTATTCAGTGTTGTCTGAGAACTAAGTTTAATTATTTAAAACTTTCAACAACGGATCTCTTGGCTCTG
>OTU_2301	AAGTCGTAACAAGGTCTCCGTTGGTGAACCAGCGGAGGGATCATTACCGAGTTTTCAACTCCCAAACCCCATGTGAACTTATACCTTTTTTACCGTTGCTTCGGCGGGTTCTTCGCCCCGGATTACCCGGAACCAGGCGGCCCGCCGGGGGACCCAAACTCTTGTATTTTTTACTTTTAGCATGTCTGAGTGGAATCATACAAAATGAATCAAAACTTTCAACAACGGATCTCTTGGTTCTG
>OTU_2302	AAGTCGTAACAAGGTCTCCGTTGGTGAACCAGCGGAGGGATCATTACAGAGTTGCAAAACTCCCTAAACCATTGTGAACGTTACCTTCAAACCGTTGCTTCGGCGGGCGGCCCGGGTCTCCCGGGGCCCCCGGCCCTACTCGGGCGCCCGCCGGAGGTATCTAACTCTTGACAATTGTATGGCCTCTCTGAGTCTTTGTACTTAATAAGTCAAAACTTTCAACAACGGATCTCTTGGTTCTG
>OTU_2303	AAGTCGTAACAAGGTTTCCGTAGGTGAACCTGCGGAAGGATCATTACTGAATAGGCTGAAAAAGCCTCATTCCCATCCTACACCTTTGTGAATTTGTTATGGTCGCTTTGGCGGGGCCGCTGTCCGCAGCGCTCCTTGAAAAGGGAGAGTCCCCGCCAAAGGTTTTCTCAAACAtttttttttAGTTAGAAAGTCTTAATGCAAATTTAATAAAACTTTTAGCAACGGATCTCTTGGCTCTC
>OTU_2304	AAGTCGTAACAAGGTCTCCGTTGGTGAACCAGCGGAGGGATCATTACCGAGTTATTCAACTCCCAAACCCCCTGTGAACCTTACCACACACGTTGCCTCGGCGGGACCGCCCCGGCGCCCTCGCGGCCCGGACCAAGGCGCCCGCCGGAGGACCACCAGACTCTCCTGTCGCAGTGGCATTTCTCTCCGAGTCAAGCAAGCAAAATGAATCAAAACTTTCAACAACGGATCTCTTGGTTCTG
>OTU_2305	AAGTCGTAACAAGGTCTCCGTAGGTGAACCTGCGGAGGGATCATTACACAATAAGAAGGCGGGCTGGGCCCTCTCCGGAGGACCAGCCTTGCTGAATTATTCACCCGTGTCTTTTGCGTACTTCTTGTTTCCTGGGCGGGCCCGCCCGCCACCAGGACAAACCATAAACCTTTTGCAATTGCAATCAGCGTCAGTAACAAACATAATAATTACAACTTTCAACAACGGATCTCTTGGTTCTG
>OTU_2306	AAGTCGTAACAAGGTCTCCGTTGGTGAACCAGCGGAGGGATCATTGCTGAGTTGTAAGACTCCAAACCACCGTGAACCTACCACTACGTTGCCTCGGCGGGCGGCTCCAGGGCGGAGCCTCAGGCCCCCCCGCGTTgggggggggCGCCCGCCGCAGGCCCATTCAACTCTGTTGTCTCTAGGCCTCTCTGAGTTACCTGCGCAAGCAGTCAAAACTTTCAACAATGGATCTCTTGGCTCTG
>OTU_2307	AAGTCGTAACAAGGTTTCCGTAGGTGAACCTGCGGAAGGATCATTACAAAGGAACCAGCCTACCCGGCTGGAACCTCCCACCACTGTGTACCGAACTTTTGTTGCCTCGGCGGGCCGGGCGCCCACCAGCGTCCCCCTAGCGGGAGCCGCCCGCCGAAGGACCATCCAAAACCTTTTGTTCATAACGTCTGATTACTTTTTATAAAGAAATACAACTTTTAACAATGGATCTCTTGGCTCTG
>OTU_2308	AAGTCGTAACAAGGTCTCCGTAGGTGAACCTGCGGAGGGATCATTACAGAGTTCGCGCCCCTCGTGGGTAGATCTCCCACCCTGTGTTATCACTACCGCGTTGCTTTGGCGGGCCGCGAGGCTCGACCTCCCACCGGCCCCGGCCGGTGCGTGCCCGCCAGAGAACCCCCGATCCTGAATGTGCGTGTCGTCTGAGTACTATACAATAGTTAAAACTTTCAACAACGGATCTCTTGGTTCTG
>OTU_2309	AAGTCGTAACAAGGTCTCCGTTGGTGAACCAGCGGAGGGATCATTACAGAGTTGCAAAACTCCCACAAACCATTGTGAACCTACCTTCAACCGTTGCTTcggcgggcggggccaccgcgcccccacccggcccccccgggggcgcccgccggAGGATACCCAAACTCTTGATATTCATGGCCTCTCTGAGTTATTCTGTACTGAATAAGTCAAAACTTTCAACAACGGATCTCTTGGTTCTG
>OTU_231	AAGTCGTAACAAGGTAACCGTAGGTGAACCTGCGGTTGGATCATTACAAAATTGGTATTTTACCAAACATTGTGTGCACTATAACTGTTCTTGGTAGCCCTGTGGAGTTGGGGATTTGCGCTGTTGAAAGTTCAACCTTGGGAGGGATTCGGATCTCGATACGAGGGTGCCTTCCGGTACCAGTCGCTCGGGATTGCGCCCCTCCCCGGCAATTGGCTTTTGCAGTGTTTCTTCTCAATAAAGCAGCCTACCGAAAGGTGGGAAGGTCCGGCTTCGCAAGCTGCCTGACATTTCTGCCTGCTCCAACCTTGTACTTTATATTTTATGTCTGAATCAATTCACCCAAAAGTGAAATGAAAAACAACTTTTGACAACGGATCTCTTGGCTCTC
>OTU_2310	AAGTCGTAACAAGGTTTCCGTAGGTGAACCTGCGGAAGGATCATTACTTTCAGTACTCTGGGGGCTGTAAGCCTGTATTCGTACAGTGGGCCTCCGTCTGAAACCCTTGTCTTTTGCGTACCTAATGTTTCCTCGGCGGGCTTGCCCGCCGTTTGGACAACTTTAAAACCTTTTTAATTTTCAATCAGCGTCTGAATAAATTTAAATATTTACAACTTTCAACAACGGATCTCTTGGTTCTG
>OTU_2311	AAGTCGTAACAAGGTCTCCGTTGGTGAACCAGCGGAGGGATCATTAAAGAGTTGCAAAACTCCCAAACCATTGTGAACATACCTTCAACGTTGCTTCGGCGGGTTGGCCCCGGTCTCCGGGGTCCCCGGCCCTACTCGGGCGCCCGCCGGAGGTATCTAACTAACTCTTGACAATTGTATGGCCTCTCTGAGTCTTTGTACTTAATAAGTCAAAACTTTCAACAACGGATCTCTTGGTTCTG
>OTU_2312	AAGTCGTAACAAGGTCTCCGTTGGTGAACCAGCGGAGGGATCATTACAGAGTTGCAAAACTCCCTAAACCATTGTGAACGTTACCTTCAAACCGTTGCTTCGGCGGGCGGCGCCCTCGCGCGCCCCTGGGCCCCACCGCGGGCGCCCGCCGGAGGTTACCCAAACTCTTGATACATTATGGCCACTCTGAGTCTTCTGTACTGAATAAGTCAAAACTTTCAACAACGGATCTCTTGGTTCTG
>OTU_2313	AAGTCGTAACAAGGTCTCCGTTGGTGAACCAGCGGAGGGATCATTACAGAGTTGCAAAACTCCCTAAACCATTGTGAACGTTACCTAAACCGTTGCTTCGGCGGGCGGCCCGGGTCCTTCCCGGCGCCCCCCGGCCCTCGCGGGCGCCCGCCGGAGGTATCTAACTCTTGAACTTTTATGGCCTCTCTGAGTCTTCTGTACTGAATAAGTCAAAACTTTCAACAACGGATCTCTTGGTTCTG
>OTU_2314	AAGTCGTAACAAGGTCTCCGTTGGTGAACCAGCGGAGGGATCATTAAAGAGTTGCAAAACTCCCAAACCATTGTGAACATACCTTCAACGTTGCTTCGGCGGGTTGGCCCGGGTCCTTCCCGGCGCCCCTCGGCCCTCGCGGGCGCCCGCCGGAGGTAAACCAAACTATTGCATTGTATGGCCTCTCTGAGTCTTCTGTACTGAATAAGTCAAAACTTTCAACAACGGATCTCTTGGTTCTG
>OTU_2315	AAGTCGTAACAAGGTCTCCGTTGGTGAACCAGCGGAGGGATCATTACCGAGTTTACAACTCCCAAACCCTTATGTGAACCGTACCTATCGTTGCTTCGGCGGGAACGCCCCGGCGCCCTGCGCCCGGATCCAGGCGCCCGCCGGAGACCCCAAACTCTTGTGTTTTTTTCAGTATTCTCTGAGGGGCGAAAGCCCGAAAACAAAATGAATCAAAACTTTCAACAACGGATCTCTTGGCTCTG
>OTU_2316	AAGTCGTAACAAGGTCTCCGTTGGTGAACCAGCGGAGGGATCATTACAGAGTTGCAAAACTCCCTAAACCATTGTGAACGTTACCTAAACCGTTGCTTCGGCGGGCGGCCCGGGTCCTTCCCGGCGCCCCCCGGCCCTCGCGGGCGCCCGCCGGAGGTAAACCAAACTCTCATGTATTATAGTGGATCTCTGAGTACAAAACAAATAAGTTAAAACTTTCAACAACGGATCTCTTGGTTCTG
>OTU_2317	AAGTCGTAACAAGGTCTCCGTTGGTGAACCAGCGGAGGGATCATTATCGAGTTACAAAACTCCCAAACCTTTGTGAACATACCATCGTTGCTTCGGCGGGACTCGCCCCGGGTGTGCTCGCACCCCGGAACCAGGCGCCCGCCGAGGGACCCAAACTCTTATGTCTTTAGTGGTTTTCTCCTCTGAGTGACACATAAACAAATAAGCAATCAAAACTTTCAGCAACGGATCTCTTGGCTCTG
>OTU_2318	AAGTCGTAACAAGGTCTCCGTAGGTGAACCTGCGGAGGGATCATTAACAAACACGCACGCTTGTCGAGTGCGCATGCGCACATGCACGCGCGGCTCGACGGCGGGACACCATGTGCAATCGATCGCGTCGCCGGAGGGGCAGGTCTCTTCCGGCGCATGCAACTACACACACACATACGCAATGTCTTGACTTACGAATAGTTGAATGCAATCAACTTTTAACAATGGATCTCTTGGCTCTC
>OTU_2319	AAGTCGTAACAAGGTCTCCGTTGGTGAACCAGCGGAGGGATCATTACAGAGTTGCAAAACTCCCTAAACCATTGTGAACGTTACCTAAACCGTTGCTTCGGCGGGCGGCCCGGGTCCTTCCCGGCGCCCCTCGGCCCTCGCGGGCGCCCGCCGGAGGTAAACCAAACTATTGCATTGTATGGCCTCTCTGAGTACTGTACTTAAATAAGTCAAAACTTTCAACAACGGATCTCTTGGTTCTG
>OTU_232	AAGTCGTAACAAGGTTTCCGTAGGTGAACCTGCGGAAGGATCATTAACAACATATCCTAACTAAAAAACCCTGTGAACTTTCAACCCCAAATCGCTTGATCCGAGTACCTCAGCAATCTTTGGTAAATCATTGTGAACAGCTTTGAGTCAGAGACCTCTGAATAACCTTGCGCGGTCGCGGTTGGTGAGGCAAGTGACCTGGTACCCTCAGTTCTGTCAGTGTGCGTTTGATTTGCAAGGGTGGCGCAGTAAACGATCGCTGGAGGCCGACACGGCCGGCGACTGGGTCAGCGAGCTTTGCTCCCACTGTTACTACTTACAAGATTTCCCAATTAGTGAAAGCTATTGGGCTATAACTAAACGACTGTTAACAATGGATATCTCGATTCTC
>OTU_2320	AAGTCGTAACAAGGTTTCCGTAGGTGAACCTGCGGAAGGATCATTACCGAGAACCGGCGCCCTCGTGGCCCGACCCTCAAACCACCGCGTACCGAACTTCAACGTTGCCTCGGCGGGGCCCCCGTTCACGCGGGAGCGCCGCCGCAGGACGCAACCAAAACCGTTTTGTGAGACGAACGTCTGATAACCTTCTTCGCGAATGCGATAAAGTACAACTTTTAACAATGGATCTCTTGGCTCCG
>OTU_2321	AAGTCGTAACAAGGTTTCCGTAGGTGAACCTGCGGAAGGATCATTACAAGGTACCTAGCCTACCCGGCTAGAACCTCCAACCACTGTGTACCAAACTTTTGTTGCCTCGGCGGGCTGGGTGCCCACCAGCGCCCCCCCTAGGGGAGTCGCCCGCCGAAGGACCTTTAAAACTTCTTTGTAGATGAACGTCTGATTCAATTTTAAAAGAAATACAACTTTCAACAATGGATCTCTTGGCTCTG
>OTU_2323	AAGTCGTAACAAGGTCTCCGTTGGTGAACCAGCGGAGGGATCATTAAAGAGTTGCAAAACTCCCTAAACCATTGTGAACATACCTTCAACGTTGCTTCGGCGGGTTGGCTCCGGGTCTCCCGGGGCCCCCGGCCCTACTCGGGCGCCCGCCGGAGGTACCTAACCCTTTACGCATGTATGGCCTCTCTGAGTCTTCTGTACTGAATAAGTCAAAACTTTCAACAACGGATCTCTTGGTTCTG
>OTU_2325	AAGTCGTAACAAGGTCTCCGTTGGTGAACCAGCGGAGGGATCATTACAGAGTTGCAAAACTCCCTAAACCATTGTGAACGTTACCTAAACCGTTGCTTcggcgggcggcccgggtcctccccggcgccccccggccctcgcgggcgcccgccggAGGAAACCCAACTCTTGATTATTATGGCCTCTCTGAGTCTTCTGTACTGAATAAGTCAAAACTTTCAACAACGGATCTCTTGGTTCTG
>OTU_2326	AAGTCGTAACAAGGTCTCCGTTGGTGAACCAGCGGAGGGATCATTAAAGAGTTGCAAAACTCCCAAACCATTGTGAACGTTACCTTTAACCGTTGCTTCGGCGGGTTGGCTCCGGGTCTCCCGGGGCCCCCGGCCCTACTCGGGCGCCCGCCGGAGGTATCTAACTCTTGACAATTGTATGGCCTCTCTGAGTCTTTGTACTTAATAAGTCAAAACTTTCAACAACGGATCTCTTGGTTCTG
>OTU_2327	AAGTCGTAACAAGGTCTCCGTTGGTGAACCAGCGGAGGGATCATTACCGAGTTTACAACTCCCTAAACCATTGTGAACGTTACCTAAACCGTTGCTTCGGCGGGCGGCCCGGGTCCTTCCCGGCGCCCCTCGGCCCTCGCGGGCGCCCGCCGGAGGTAAACCAAACTATTGCATTGTACGGCCTCTCTGAGTCTTCTGTACTGAATAAGTCAAAACTTTCAACAACGGATCTCTTGGTTCTG
>OTU_2328	AAGTCGTAACAAGGTCTCCGTTGGTGAACCAGCGGAGGGATCATTACAGAGTTGCAAGACTCCCAAACCATTGTGAACGTACCCGAAACCGTTGCTTCGGCGGGCGGCCCCGGATCTCCCGGGCGCCCCTGGGCCCTCGCGGGCGCCCGCCGGAGGCACACAAACCCTGTACCTTGCATGGCCTCTCTGAGTCTTCTGTACTGAATAAGTCAAAACTTTCAACAACGGATCTCTTGGTTCTG
>OTU_2329	AAGTCGTAACAAGGTCTCCGTTGGTGAACCAGCGGAGGGATCATTACAGAGTTGCAAAACTCCCTAAACCATTGTGAACGTTACCTAAACCGTTGCTtcggcgggcggccacgggctcgcccccgcggcccccggccccctcaagggcgcccgccggAGGCTCTAACTCTTGAATTTATGGCCTCTCTGAGTCTTCTGTACTGAATAAGTCAAAACTTTCAACAACGGATCTCTTGGCTCTG
>OTU_233	AAGTCGTAACAAGGTTTCCGTAGGTGAACCTGCGGAAGGATCATTAACAACGTATCCTAAACGTAAAAAACCCCCCCTGTGAACTTTCATAACCCGAGCTTGCTAGGCCCGCGAAATTCAGCAATCCCTGGTAAATCATTGTTGACCAGCTCTTTGAGTCAGGGATATCCGAACTAGTCGTGTGGATTAAGTTCCGTGAAGCAAGAGCGGTGAGGCAAGTGACCCGGTACCCCCAAGCAATCAGTGTCGTAAACGATCGCTGGAGGCCACCACGGCCGGCGACTGGGTCAGCGAGCTCTGCTCCTGAGTAACCCCACCTAAGGATTAGCTCGGCGAAAGATTGAGCACCAAAAACTAATACGACTGTTAACAATGGATATCTTGGTTCTC
>OTU_2331	AAAGTCGTAACAAGGTCTCCGTTGGTGAACCAGCGGAGGGATCATTAAAGAGTTTAACTACTCAAACCATTGTGAACCTTACCTCAACCGTTGCTTcggcgggcgggcccgggccatgcccggcgccccccggccctcgcgggcgcccgccggAGGTTAACCGAACCCTTGAATTGTATGGCCTCTCTGAGTCTTCTGTACTGAATAAGTCAAAACTTTCAACAACGGATCTCTTGGTTCTG
>OTU_2335	AAGTCGTAACAAGGTCTCCGTTGGTGAACCAGCGGAGGGATCATTACAGAGTTGCAAAACTCCCTAAACCATTGTGAACGTTACCTTCAAACCGTTGCTTCGGCGGGTTGGCCCCGGTCTCCGGGGTCCCCGGCCCTACTCGGGCGCCCGCCGGAGGTATCTAACTCTTGAACTTTTATGGCCTCTCTGAGTCTTCTGTACTGAATAAGTCAAAACTTTCAACAACGGATCTCTTGGTTCTG
>OTU_2336	AAGTCGTAACAAGGTTTCCGTAGGTGAACCTGCGGAAGGATCATTAACAAATCATCCATAGTGCGCTGGCCTCTGGCTGCCCACTATATACACCCCAAGCCTGGGAAGAGCAGCGATGCTTGGAACGGCTTTGGTAGGCTGCGCGCCGCAAGGCGCTGGCCACATAGACGCTTGCTTGGTTTGACAGAGTTACAGTTGCATCTAAACGAATACAACTTTTAACAATGGATCTCTTGGCTCTT
>OTU_2337	AAGTCGTAACAAGGTCTCCGTAGGTGAACCTGCGGAGGGATCATTACAGAGACTCTGCCCTTTGGGTAGACCTCCCACCCTGTGTCGTTATACCTTTGTTGCTTTGGCGGGCCGCGGGGCTTAGGCCCTGCCCCTGGCTCCGGCTAGGGCGCGCCCGCCAGAGGACCTCAAAACCTGAATGTTAGTGTCGTCTGAGTACTATATAATAGTTAAAACTTTCAACAACGGATCTCTTGGTTCTG
>OTU_2338	AAGTCGTAACAAGGTCTCCGTTGGTGAACCAGCGGAGGGATCATTAAAGAGTTTAACTACTCAAACCATTGTGAACCTTACCTCAACCGTTGCTTCGGCGGGCGGGCCCGGGTCCGCCCGGTGCCCCCTGGCCCCCTAGCGGGGCGCCCGCCGGAGGAAACCCAACTCTTGATTATTATGGCCTCTCTGAGTCTTCTGTACTGAATAAGTCAAAACTTTCAACAACGGATCTCTTGGTTCTG
>OTU_2339	AAGTCGTAACAAGGTCTCCGTTGGTGAACCAGCGGAGGGATCATTACAGAGTTGCAAAACTCCCAAACCATCGTGAACGTTACCTACATCGTTGCTTCGGCGGGCGGCCCGGGTCCTGCCCGGCGCCCCTCGGCCCTCGCGGGCGCCCGCCGGAGGTAAACCAAACTCTTGAATTGTATGGCCTCTCTGAGTCTTCTGTACTGAATAAGTCAAAACTTTCAACAACGGATCTCTTGGTTCTG
>OTU_234	AAGTCGTAACAAGGTCTCCGTAGGTGAACCTGCGGAGGGATCATTAACACGTTTCCAAAACGTTTACCAACCAAATCAACGTGAACCATAACCAACTCCCTTGTCAGTGTGACGAACGAATAATCATCAGGGTGGAGGATAGCGAAAGCTATACTATGACTCGTTCTAGGGGCCCTTTGAGGCTTCAATCCACTGACAAGTGTCTTTGCGACCACCTGGCAGTCTACATTCGTGTAGCGTTCTGCCGAATTTTGTTTAACCCAATTTTTTAACCCCTTTCACAACATACTAATAACTGAACCAtttttttttCACATGTCCTTGTGATAATGTGATAAAAAAGATATACGTAATGCTGAACAACTCTTAGCAATGGATATCTTGGTTCTC
>OTU_2341	AAGTCGTAACAAGGTCTCCGTTGGTGAACCAGCGGAGGGATCATTACAGAGTTGCAAAACTCCCTAAACCATTGTGAACGTTACCTAAACCGTTGCTTCGGCGGGCGGCCCGGGTCCTTCCCGGCGCCCCCCGGCCCTCGGGGGCCCGCCGGAGGTACACCAAACTCTTGAATTTACATGGCCTCTCTGAGTCTTCTGTACTGAATAAGTCAAAACTTTCAACAACGGATCTCTTGGTTCTG
>OTU_2342	AAGTCGTAACAAGGTCTCCGTTGGTGAACCAGCGGAGGGATCATTACAGAGTTGCAAAACTCCCCAAACCATTGTGAACCTTACCTCTAACCGTTGCTTCGGCGGGCGGGGCCACAGCGccccccccgggccccccAGCGGGGCCGCCCGCCGGAGGATACCCAACTCTTGATTATTATGGCCTCTCTGAGTCTTCTGTACTGAATAAGTCAAAACTTTCAACAACGGATCTCTTGGTTCTG
>OTU_2343	AAGTCGTAACAAGGTCTCCGTTGGTGAACCAGCGGAGGGATCATTACAGAGTTGCAAAACTCCCAAACCATTGTGAACGTTACCTTCAAACCGTTGCTTCGGCGGGAGGCCCGGGTCCGCCCGGTGCCCCCTGGCCCCCTAGCGGGGCGCCCGCCGGAGGCTCCAACTCTTGAATTTATGGCCTCTCTGAGTCTTCTGTACTGAATAAGTCAAAACTTTCAACAACGGATCTCTTGGTTCTG
>OTU_2344	AAGTCGTAACAAGGTTTCCGTAGGTGAACCTGCGGAAGGATCATTAAAGATTTTGGGCTTTTAACCCGATCGTTCAGCTGTGCGCCCTTCACAGGGCTGCACGCTGGAGCAAGACCCCACACCTGTGCACCTTTTCGGTTGCGGCTTCGGTCGCTGCCGCTTTCAAATGCAACAACTCAGTCTCGAATGTTAACAAAACCATAAAAAGTAACAACTTTCAACAACGGATCTCTTGGCTCTC
>OTU_2345	AAGTCGTAACAAGGTTTCCGTAGGTGAACCTGCGGAAGGATCACTAGTGATTAAATCGAGAGCGTCTTCATTGACCTCTCACCCTTCACATCCACATACACCTGTGAACCGTTTGGCTTTTCTTTAACAGAGCGCAAGCTCGACGAGAGAAAAGTCATCTTTTTATACATACCCCAGTCTTATGAATGTAACAGTTTTAATAAACAAAATAAAACTTTTAACAACGGATCTCTTGGTTCTC
>OTU_2346	AAGTCGTAACAAGGTCTCCGTTGGTGAACCAGCGGAGGGATCATTACCGAGTTTACAACTCCCAAACCCAATGTGAACATTACCTTGACGTTGCCTCGGCGGGACCGCCCCGGCGCCCTCACCGGCACCGGAACCAGGCGCCCGCCGCAGGGACCCAAACCTCTGTTTTATTATGAATTCTCCTCTGAGTGGATTTTATACAAATAAATCAAAACTTTCAACAACGGATCTCTTGGCTCTG
>OTU_2347	AAGTCGTAACAAGGTTTCCGTAGGTGAACCTGCGGAAGGATCATTAATGAATACAGATGCCTGTCGAGCTTGCTCACGGGTTTTCTATCATATCCATAACACCTGTGCACTTGTTGGATGTTCTAAAGACGTAGGCTTAAAGCTGAAGTCAATAGTCATCCACTTACACTAAACAATAATGTAACAAATGTAGTCTTATTATAACATAATAAAACTTTCAACAACGGATCTCTTGGCTCTC
>OTU_2348	AAGTCGTAACAAGGTCTCCGTTGGTGAACCAGCGGAGGGATCATTACCAGAGTGCCCTAGGCTCTCCAACCCATTGTGAACTTACCAAACGTTCCCTCGGCGGGCTCAGCGCGCGGTGGCCTCCGGGCCTCCGGGCGTCCGCCGGGGAAAACCAAACCCTGATTTAATCGTATTTCTCTGAGGGGCGAAAGCCCGAAAACAAAATGAATCAAAACTTTCAACAACGGATCTCTTGGCTCTG
>OTU_2349	AAGTCGTAACAAGGTCTCCGTTGGTGAACCAGCGGAGGGATCATTACTGAAGGTCTACGTACCTAAAACCATTGTGAACCTTTTCCTTTGCTGCCTCGGCGGGCAATCCCAGGGCGGGATTCCTGGCCTCTTTTAGGGGCGTCCGCCGGCGGTGCACCTCTCTAGCTCTTGTCTGCGACAGGCTTCTGAGTGGTCTTGAAAAAACAAGTCAAAACTTTCAACAACGGATCTCTTGGCTCTG
>OTU_2350	AAGTCGTAACAAGGTTTCCGTAGGTGAACCTGCGGAAGGATCATTACTTTCAGTACTTTGGGGGCTGTCAGTCTATATCACTATAGCGAGCCTCCGTCTGAAACCCTTGTCTTTTGCGTACCTTATGTTTCCTCGGCGGGCTTGCCCGCCGGTTGGACAACCTTAAAACCTTTTTAATTTTCAATCAGCGTCTGAAAAAACATAATAATTACAACTTTCAACAACGGATCTCTTGGTTCTG
>OTU_2351	AAGTCGTAACAAGGTCTCCGTTGGTGAACCAGCGGAGGGATCATTACAGAGTTGCAAAACTCCCAAAACCATTGTGAACCTTACCTTCAACCGTTGCTTCGGCGGGCGGGCCCTGCGCCCCCTGGGCCCCCCTCGCGGGGGCGCCCGCCGGAGGTCTCCCAAACTCTTGATACCATGTGGCCTCTCTGAGTCTTCTGTACTGAATAAGTCAAAACTTTCAACAACGGATCTCTTGGTTCTG
>OTU_2352	AAGTCGTAACAAGGTTTCCGTAGGTGAACCTGCGGAAGGATCATTAATGAATACAGATGCCTGTCGAGCTTGCTCACGGGCTTTCTATCATATCCATAACACCTGTGCACTTGTTGGATGATCTAAAGACATAGGGTAAAACCTAAAGTCAATAGTCATCCACTTACACTAAACAATAATGTAACAAATGTAGTCTTATTATAACAAAATAAAACTTTCAACAACGGATCTCTTGGCTCTC
>OTU_2353	AAGTCGTAACAAGGTCTCCGTTGGTGAACCAGCGGAGGGATCATTACCAGAGTGCCCTAGGCTCTCCAACCCATTGTGAACATACCTATCGTTCCCTCGGCGGGCTCAGCGCGCGGCCGGCCTCCGGGCCACCGGGCGTCCGCCGGGGACAACCAAACCCGAATTTTTCGTGTATATCTGAGGGGCGAAAGCCCGAAAACAAAATGAATCAAAACTTTCAACAACGGATCTCTTGGCTCTG
>OTU_2354	AAGTCGTAACAAGGTCTCCGTAGGTGAACCTGCGGAGGGATCATTACAGAGTTCTCGCCCTCGCGGGTAGATCTCCCACCCACTGTTATTGCTACCGTGTTGCTTTGGCGGGCTGCTGGGCCTAGCCCGGCCGCCGGCTCCGGCTGGCGCGCCCGCCAGAGGCCCGACAAATTCTGATTGTCAGTGTCGTCTGAGTACTATATAATAGTTAAAACTTTCAACAACGGATCTCTTGGTTCTG
>OTU_2355	AAGTCGTAACAAGGTCTCCGTTGGTGAACCAGCGGAGGGATCATTACAGAGTTGCAAAACTCCCTAAACCATTGTGAACGTTACCTACATCGTTGCTTCGGCGGGTGGCGGGCTTCGGCCCTGCCCTCGGCCCCTCTCGGGGGCCCGCCGGAGGTACACCAAACTCTTGAATTTACATGGCCTCTCTGAGTCTTCTGTACTGAATAAGTCAAAACTTTCAACAACGGATCTCTTGGTTCTG
>OTU_2356	AAGTCGTAACAAGGTCTCCGTTGGTGAACCAGCGGAGGGATCATTACGAGAGTGTCACCACTCCCAACCCATTGTTTACCTACCCGTCCACCGTGCTTCGGCAGGCAGTCCTGTGGGACAGGGCCTCGCCCCCCTCCCGGGGGGTGCCTGCCGCTGGCCAACCAACCATTCTTGCTGTTTTTGTACCATCTGAGTCTTCCACAAATAAACAAAACTTTCAACAACGGATCTCTTGGTTCTG
>OTU_2357	AAGTCGTAACAAGGTTTCCGTAGGTGAACCTGCGGAAGGATCATTATCGAGATCGAACCTCTGGGAGGGGGAGGGCTTCCCGAACCCTTTCGAGGCTTCAGCCCTCTAACACCTGTGTGCACCCGCTGTAGGTCCTTAGGGACCTATGTCTTCTTCGAACTCGCATGTCTACAGAACGTCGTCCGTGACCTCGGTCACAGGAAACCTAATACAACTTTCAGCAATGGATCTCTTGGCTCTC
>OTU_2358	AAGTCGTAACAAGGTCTCCGTAGGTGAACCTGCGGAGGGATCATTAAGATGCGCACAGCCTCTGCGCGCGGCGGCCCACCAGCTGCCGCACGCACGCCTTGCATCCTCGATATTACAGCACCTTGCGTTCTCCTTCGGCGGGTCGACCCGCCGTCGGAACCAAAACATTCTTTGCTCGCAGCAATACCCGTTCCGAAACAAACAATCGTTACAACTTTCAACAATGGATCTCTTGGCTCTG
>OTU_2359	AAGTCGTAACAAGGTTTCCGTAGGTGAACCTGCGGAAGGATCACTAGTGATTAAATCGAGAGCGTCTTAATTGACCTCTCACCCTTCACATCCACATACACCCTGTGAATCGTTTGGCTTTTCATTAATAGAGCGCAAGCTCGACAAGTGAAAAGTCATCATTTATACATACCCCAGTCTTATGAATGTAACAGTTTTAATAAACATAATAAAACTTTTAACAACGGATCTCTTGGTTCTC
>OTU_236	AAGTCGTAACAAGGTTTCCGTAGGTGAACCTGCGGAAGGATCATTAACACGTATCCAACGTTAAACAACCCTGTGAACTTTCAGCGCTCTTGTAGCCCCGGAGGAACAGCAATCCCGGTAAATCAAATGGCGGAAAGATTTTTGATTCGGGACCTCTGTCCAAAAGGTATCAAGTTACAATCGAGCAGAGCAGTGGCATGGTTTCCCTAAGCAGTGCAGAAGGATCCACTGAGTAAGGATAACGCATCACGGTTGCCAGAGGTCGATCACCGGCCGGCAGACATGTCACAGGGCTTTACGCCCCTTCATTCACCCCTTGCCTAATCAAGCCTCGCGGAAACGCCGGGCATAAAAACCGAACAACTGTTAACAATGGATATCTTGGTTCTC
>OTU_2360	AAGTCGTAACAAGGTCTCCGTAGGTGAACCTGCGGAGGGATCATTACACAATACAATATGAAGGCCCGTAACACGGCTGGATTATTTTATTACCCTTGTCTTTTGCGCACTTGTTGTTTCCTGGGCGGGTTTCGCCCGCCACCAGGACCACACCATAAACCTTTTTTATGCAGTTGCAATCAGCGTCAGTACAACAAATGTAAATCATTTACAACTTTCAACAACGGATCTCTTGGTTCTG
>OTU_2361	AAGTCGTAACAAGGTCTCCGTTGGTGAACCAGCGGAGGGATCATTACAGAGTTGCAAAACTCCCTAAACCATTGTGAACGTTACCTTCAAACCGTTGCTTCGGCGGGCGGCGCCCAGCGCCCCCCAGGCCCCCTCGCGGGGCGCCCGCCGGAGGTACCCCAAACCATTGATACTTTATGGCCTCTCTGAGTCTTCTGTACTGAATAAGTCAAAACTTTCAACAACGGATCTCTTGGTTCTG
>OTU_2362	AAGTCGTAACAAGGTTTCCGTAGGTGAACCTGCGGAAGGATCATTCATAATCGAGTGTTTTATGGCACTCTTTAAAAAATCCATATCCACCTTGTGTGCAACGTTTTTGAACTCTCTCTGGCGTTAAAAAACCAAGAGGGTTTGATTAACTTAACACCTTTAAAGCAGTTTGTCTGAATATCTATTTCTGAATAAACATAATTCAAAAATACAACTTTCAACAACGGATCTCTTGGTTCTG
>OTU_2363	AAGTCGTAACAAGGTCTCCGTTGGTGAACCAGCGGAGGGATCATTACAGAGTTGCAAAACTCCCTTAAACCATCGCGAACGTACCCGTACATGTTGCTTCGGCGGCCGGCTCCAGGGCGGAGTCTTCTAGCCTTCACCGGCGACCGCCGGAGTGCCTATACTCCAAACTATTATCTTCGTGGGCCTCTCTGAGTAATACTATAATAAGTAAAAACTTTCAACAACGGATCTCTTGGTTCTG
>OTU_2364	AAGTCGTAACAAGGTCTCCGTTGGTGAACCAGCGGAGGGATCATTACAGAGTTGCAAAACTCCCTAAACCATTGTGAACCTTACCTTCAACCGTTGCTTCGGCGGGCGGGCCACAGCGCCCCCCGGGCCGCCCCAGCGGGGCGCCCGCCGGAGGATACCCAAACTCTTGATACTTTATGGCCTCTCTGAGTCTTCTGTACTGAATAAGTCAAAACTTTCAACAACGGATCTCTTGGTTCTG
>OTU_2365	AAGTCGTAACAAGGTCTCCGTTGGTGAACCAGCGGAGGGATCATTACAGAGTTTTCTAAACTCCCAACCCTATGTGAACTTACCTTTGTTGCCTCGGCGGGGCCTACCCGGTACCCCTCCCTTTTGGGAGAGACTACCCTGTAGCCCGCCGGTGGATTTTCAAACTCTTGTTATTTATAATGATATCTGAGCGTCTTATTTTAATAAGTCAAAACTTTCAACAACGGATCTCTTGGTTCTG
>OTU_2366	AAGTCGTAACAAGGTCTCCGTTGGTGAACCAGCGGAGGGATCATTACCGAGTTTACAAACTCCCAAACCCTTTGTGAACCTTACCATATTGTTGCTTCGGCGGGACCGCCCCGGCGCCTTCGGGCAACGGAACCAGGCGCCCGCCGGAGACCCCAAACTCTTATGTCTTTAGTGGTTTCCTCCTCTGAGTGACACATAAACAAATAAATAAAAACTTTCAACAACGGATCTCTTGGTTCTG
>OTU_2367	AAGTCGTAACAAGGTTTCCGTAGGTGAACCTGCGGAAGGATCATTACAGAGTTCATGCCCTTCGGGGTAGACCTCCACCCTTGCATACCTTACCTTTGTTGCTTTGGCGGCCCGCCTCACCTTGTGTGAGGCCACTGGTCTTGGCCGGTGCGTGACCGTCGAAGGTTATCAACTCTATAATTTATGTCGTCTGAGTACTATACAATAGTTAAAACTTTCAACAACGGATCTCTTGGTTCTG
>OTU_2368	AAGTCGTAACAAGGTTTCCGTAGGTGAACCTGCGGAAGGATCATTCACAATAAGTGTTTATGGCACTTTTAACAATCCATACCCACCTTGTGTGCAACGTTTGAATTTGGAACCGCACGCGTTAAGCGTAAGGGGAAGGATTCTTAACATCAACTTATCTTAACTAGTTTGTCTGAATCAACGTATCATGAATTAACTTAATTCGAAAATACAACTTTCAACAACGGATCTCTTGGCTCTC
>OTU_2369	AAGTCGTAACAAGGTCTCCGTTGGTGAACCAGCGGAGGGATCATTACCGAGTTCTAACAAACTCCCAAACCCCTGTGAACATACCTATCGTTGCTTCGGCGGGACCGCCCCGGGCGCCTTTCGAGGTGCCCCGGAACCAGGCGCCCGCCGGGGACACCAAACTCTTGATTGTTATAGTGGCATTCTCTGAGTAAATTATACAAATAAATCAAAACTTTCAACAACGGATCTCTTGGCTCTG
>OTU_237	AAGTCGTAACAAGGTTTCCGTAGGTGAACCTGCGGAAGGATCATTAACACGTATCCAACGTTAAACAACCCTGTGAACTTTCAGCGCTCTTGTAACCCAGGCGGAACAGCAATCCCGGTAAATCAATGGCGGAAAAGTTTTGATTCGGGACCTCTGTCCAAAAGGTATCAAGTTACAATCGAGCTAGGAGCAGTGGCATGGTTTCCCTAAGCAGTGCAGAAGGATCCACTGAGTAAGGATAACGCATCACGGTTGCCAGAGGTCGATCACCGGCCGGCAGACATGTCACAGGGCTACATGCCCCTTCATTCACACCTTGCTCTCTCATGCCCCGCGGAAACGCCGGGCACAAAAACCGAACAACTGTTAACAATGGATATCTTGGTTCTC
>OTU_2370	AAGTCGTAACAAGGTTTCCGTAGGTGAACCTGCGGAAGGATCATTAACACTAATGAAATCCAAAACCTTTTGGATCAACCCAACCTTAGCGAACCGTTCGTTTTTTTCCCTTTGCCCCACATTTTATCAAACGCAAAACAAATCTGATGTAAAGTGTCTGATTCTTATTCCTCGTGTGTAACCACGCTGGAATCAAAAATCTAACGCAATACAACTCTTAACAACGGATATCTTGGCTCTC
>OTU_2371	AAGTCGTAACAAGGTTTCCGTAGGTGAACCTGCGGAAGGATCATTACACATATAAACTAGATCTCAGGGGAGGTTCGCCTCTTTCTGAGATGTATGTTATACCCATGTCTTTTGCGTACTACTTGTTTCCTTGGTAGGCTTGCCTGCCAATAGGACAAAATCAAAACCTTTTGTAATTGCAGTCAGCGTCAGAAATAACTTTTAATAGTTACAACTTTCAACAACGGATCTCTTGGTTCTG
>OTU_2372	AAGTCGTAACAAGGTCTCCGTTGGTGAACCAGCGGAGGGATCATTACAGAGTTGCAAAACTCCCAACCATTGTGAACCTACCTCACCGTTGCTTCGGCGGGTGGCCAGGGGCAACCCAGGCCGCGCCGGCCCCCCTCGCGGGGCTGGCAACCCGTCAGAAGCCCGAAACTCTAGCATATTGGCCTCTCTGAGTAACTTATACAATAAGTCAAAACTTTCAACAACGGATCTCTTGGTTCTG
>OTU_2374	AAGTCGTAACAAGGTTTCCGTAGGTGAACCTGCGGAAGGATCATTCGTAATAAGTGTTTTATGGCACTTTAAAATCCATATCCACCTTGTGTGCAATGTCAGCCTGACCCCCACATCCCAGCAATGGGTGTGTGTGAAGGGTTTCATTATCCACGTCCATAGTTTTTCTTTTTCCAGTCTACATACTTAGAGTAGTAAACGAACTCAAATACAACTTTCAACAACGGATCTCTAGGCTCTC
>OTU_2375	AAGTCGTAACAAGGTTTCCGTAGGTGAACCTGCGGAAGGATCATTATCGAATAAACTTTGAGCAGGCTGCTGCTGGCCTTCAGAGGCATGTGCACGCTTCTCATATTTTTATTTTTCCAACTGTGCACTTATTGTAGACCCCCTTGGGGTGTCTATGTTCTTTTTTGTAAACCACCTTTGAATAACTTGGAGATGATGATAAATAATATAACAACTTTCAGCAATGGATCTCTTGGCTCTC
>OTU_2377	AAGTCGTAACAAGGTTTCCGTAGGTGAACCTGCGGAAGGATCATTATTGAAATAAACCTGATGGGTTGTTGCTGGTTCTCTAGGGAGCATGTGCACGCCTTGTCATCTTTATATCTCCACCTGTGCACTTATTGTAGGCCTTTTTAGGTCTATGTTGCTTCACTTACCCCAATGTATGTCAATAGAATGTTGTGCCTATATATAATATATACAACTTTCAGCAACGGATCTCTTGGCTCTC
>OTU_2378	AAGTCGTAACAAGGTCTCCGTTGGTGAACCAGCGGAGGGATCATTACAGAGCTTAACAACTCCCAAACCCCTGTGAACATACCACTGTTGCTTCGGCGGGCACGCCCCGGGCGCTCATCGCGTGCCCCGGAACCAGGCGCCCGCCGGGGGACCCAATCTCAAACTCTTTGTCTCCACGAGCATCTTCTGAGTGATACAAGCAAATAAATCAAAACTTTCAACAACGGATCTCTTGGTTCTG
>OTU_238	AAGTCGTAACAAGGTTTCCGTAGGTGAACCTGCGGAAGGATCATTACAACGTATCCACGTACCAAACTCTCGAACTGTTCCCAACGGAGCAAAGCACACACTTGTGTGAGAAGTTAATGGCCGACTGTCTTTCGCTGATGGAGTCCACTGACTTTTTGTCTGAGGACTGAAAGGCTTTCGGTCGCTGGAGCTTCGGCTCTGGGACTTTGTTTGCTTCGTTGCGGTTTCTACCGTCAGCACTTGTTTTACCATTATTAACCCTTTGAATTATTGAACTGAACTTGAAAGCCTCGCAACCGTCCTTGTTGGCTTCGGTCACGGACAGTGTAGCTTGGTTTTTCTCATTTACGAAACAAAGAACAACTCTTAGCAACGGATATCTTGGTTCTC
>OTU_2381	AAGTCGTAACAAGGTCTCCGTTGGTGAACCAGCGGAGGGATCATTACAGAGTTGCAAAACTCCCTAAACCATTGTGAACGTTACCTAAACCGTTGCTTCGGCGGGCGGCCCGGGTCCTTCCCGGCGCCCCCCGGCCCTCGCGGGCGCCCGCCGGAGGTAAACCAAACTATTGCATTAATGGCCTCTCTGAGTAAACCGATTAAATAAATCAAAACTTTCAACAACGGATCTCTTGGTTCTG
>OTU_2383	AAGTCGTAACAAGGTTTCCGTAGGTGAACCTGCGGAAGGATCATTACCTTTTTATTCAGCATGGGAGCCTGCAGTTCGCTGTGGTTCCCTGTCTGTATCCGTGTCTTTTGCGTACTTGAACGTTTCCTCGGCGGCTCACCCCGCCGAACGGACAACTACATAAACCTTTTTTGCAATTGCAATCAGCGTCTGAACAAATATTTAATATTTACAACTTTCAACAACGGATCTCTTGGTTCTG
>OTU_2384	AAGTCGTAACAAGGTCTCCGTTGGTGAACCAGCGGAGGGATCATTACTGAGTGTAAAAACTCCCAAACCCATTGTGAACATACCACTGTTGCTTCGGCGGATGCGCCCCGGGCGCGCCCTCACAGGCGTGCCCCGGACCAAGGCGCCCGCCGGGGGACCGAAACTCTTGTTTTCTTACAGAATCTCTGAGTGTGATTTTGAATCAAATCAAAACTTTCAACAACGGATCTCTTGGCTCTAG
>OTU_2385	AAGTCGTAACAAGGTCTCCGTTGGTGAACCAGCGGAGGGATCATTACCGAGTTTTCAACTCCCAAACCCCTGTGAACATACCAATCGTTGCCTCGGCGGGAGAGCCCCGGGCGTTGGCGAAAGCCTCGCACCGGTATCAGGCGCCCGCCGGAGGACCCAAACAAACTCTTGAATTCTAAAGTATCTTCTGAGTAAAACCATAAATAAATCAAAACTTTCAACAACGGATCTCTTGGTTCTG
>OTU_2386	AAGTCGTAACAAGGTCTCCGTTGGTGAACCAGCGGAGGGATCATTACAGAGTTGCAAAACTCCCTAAACCATTGTGAACGTTACCCAAACCGTTGCTTCGGCGGGCAGGCGCCCAGCGCGCCCCCCGGGCCCCTCGCGGGGCGCCCGCCGGAGGTACCCCAAACCATTTGATATTTATGGCCTCTCTGAGTCTTCTGTACTGAATAAGTCAAAACTTTCAACAACGGATCTCTTGGTTCTG
>OTU_2387	GTAAAAGTCGTAACAAGGTTTCCGTAGGTGAACCTGCGGAAGGATCATTAAAGAGACGTTGCCCTTCGGGGTATACCTCCCACCCTTTGTTTATTATACCTTTGTTGCTTTGGCGGGCCCGTCCTCGGACCACCGGCTTCGGCTGGTCAGTGCCCGCCAGAGGACCTAAAACTCTGTTTGTTCATATTGTCTGAGTACTATATAATAGTTAAAACTTTCAACAACGGATCTCTTGGTTCTG
>OTU_2388	AAGTCGTAACAAGGTCTCCGTTGGTGAACCAGCGGAGGGATCATTACCGAGTTTTCAACTCCCAAACCCACTGTGAACATATACCTTTGTTTTCGTTGCCTCGGCGGTTTCTTGCTCCCTGGAAACAGGGGCGCTTGCCGCCGCCGGGGGACACACAAACTCTGATTATTATCATACAGAATTTCTGAGTAAAATCATACTAAATGAATCAAAACTTTCAACAACGGATCTCTTGGTTCTG
>OTU_2389	AAGTCGTAACAAGGTTTCCGTAGGTGAACCTGCGGAAGGATCATTACATGTTTGAATTAGCTGCTCCCCCCTTGAAACGGGGCCAGTTATTCTTCTACCCATGCCTTTTTGCGTACTGCTTGTTTCCTCGGTAGCCTCGCCTACCGATAGGACAACTTAAAAACCCTTTTTTTGTAATTGCAATCAGCGTCAAAAGATAACTTAATAGTTACAACTTTCAACAACGGATCTCTTGGTTCTG
>OTU_239	AAGTCGTAACAAGGTCTCCGTAGGTGAACCTGCGGAGGGATCATTAACACTATTTGTACTATTGTAAAAGATAGTTCAAATTTCCATACACCGCGTGAACTTGTTGGTTTCGCAAGAAACTGACCTAATATAACTTCGCTTGAGGATAGAGGGCCGCTGGGACAAGTGACATCCGTTCCATGAGACTTCGGTCAAGTGGCTGATGGCTGCCGCCTTTGTTTCCTCAACTGGGGTTTTTTTGGGAGGTGTGACACTTACATGCCTCGTCCCCTTTGCCAttttttttCCACTTAAGCCAATTGACTGAGGTTATTGAAGTAGATCGACAGGTTTATCTTCAATAGTAATACAAACTAAGCACAACTCTTAGCAACGGATATCTTGGTTCTC
>OTU_2390	AAAGTCGTAACAAGGTTTCCGTAGGTGAACCTTCGGAAGGATCATTACCGTAACGCGGCGGTCCGGCAACCGCAAGGAAGTCGGCCGCCACACGCGTTTATCACCCTTGACTTTGAGCACCTTTCGTTTCCTCGGCGGGTTCGCCCGCCAGCGAGGACCCCCACAAACCCTTTGTAATAGCAATATTTGTCTGAAAAACAACCAATAATCAAAACTTTCAACAATGGATCTCTTGGTTCTG
>OTU_2391	AAGTCGTAACAAGGTCTCCGTTGGTGAACCAGCGGAGGGATCATTACAGAGTTGCAAAACTCCCAAAACCATCGCGAACCCTACCTTCAACCGTTGCTTCGGCGGGCGGGCGCCACCGTGCGccccccggcccccccAGGGGCGCCCGCCGGAGGTACCTAACTCTTGTTGATCACATGGCCTCTCTGAGTCTTCTGTACTGAATAAGTCAAAACTTTCAACAACGGATCTCTTGGTTCTG
>OTU_2392	AAGTCGTAACAAGGTCTCCGTTGGTGAACCAGCGGAGGGATCATTACAGAGTTGCAAAACTCCCTAAACCATCGTGAACGCTACCTAAACCGTTGCTTCGGCGGGCGGCGCCCTTGCGCGCCCCTGGGCCCGCACCGCGGGCGCCCGCCGGAGGTACACCAAACTCTTGATACTTTATGGCCACTCTGAGTCTTCTGTACTGAATAAGTCAAAACTTTCAACAACGGATCTCTTGGTTCTG
>OTU_2393	AAGTCGTAACAAGGTCTCCGTTGGTGAACCAGCGGAGGGATCATTAAAGAGTTGCAAAACTCCCAAACCATTGTGAACATACCTTCAACGTTGCTTcggcgggcggccgcgggctcacccccgcggcccccgggccccctccagggcgcccgccggAGGCTCCAACTCTTGAATTTATGGCCTCTCTGAGTCTTCTGTACTGAATAAGTCAAAACTTTCAACAACGGATCTCTTGGTTCTG
>OTU_2394	AAGTCGTAACAAGGTTTCCGTAGGTGAACCTGCGGAAGGATCATTACTGCTTGCTTACGGTCTCGCTTCGGGCAACCGAGCGGGATCGGGCACGCTACCCTTGCTTATGTATACCTTTTGTTATTCCCTCGGCGGGGAAACCTGCCGCTGGGATCTTATAAACCCTCTTGTATTATAGCATCAAAATTTCTGAAAACAAACAAATAATCACAACTTTTAACAATGGATCTCTTGGTTCTG
>OTU_2395	AAGTCGTAACAAGGTCTCCGTTGGTGAACCAGCGGAGGGATCATTACCGAGTTTACAAACTCCCAAACCCTTTGTGAACCTTACCGTATCGTTGCTTCGGCGGGACCGCCCCGGCGCCCTCGGGCCCGGAACCAGGCGCCCGCCGGAGGCCCCAAACCCTCATGTCTTTAGTGGTTTTCTCCTCTGAGTGACACATAAACAAATAAATAAAAACTTTCAACAACGGATCTCTTGGTTCTG
>OTU_2396	AAGTCGTAACAAGGTTTCCGTAGGTGAACCTGCGGAAGGATCATTACTGCTTGCTTACGGTCTCGTTGCGGGCAACCGCGCGAGATCGGGCACGCTACCCTTGCCTATGTATACCTATCGTTACTCCCTCGGCGGGGAGACTCGCCGCTGGGATCGCATAAACCCTTTGTATTATAGCATCAAAACTTCTGAAAACAAACTAAATAATCACAACTTTCAACAATGGATCTCTTGGTTCTG
>OTU_2397	AAGTCGTAACAAGGTCTCCGTTGGTGAACCAGCGGAGGGATCATTACCGAGTTTACAACTCCCAAACCCCATGTGAACCTTACCTCAACGTTGCTTCGGCGGTCACGCCCCGGCGCCCCAGTGGCCCGGACCCAGGCGCCCGCCGGAGGACCTCCAAACCATTGTGTTATTTAGTGGCATTGTCTGAGTGGCGTAAAGCAAAATAAATCAAAACTTTCAACAACGGATCTCTTGGCTCTG
>OTU_2398	AAGTCGTAACAAGGTAACCGTAGGTGAACCTGCGGTTGGATCATTAATAAATGTGATTTTCGACTCCTTCTCTTCTCGGAGAGAGGTTGAGTTGATTACCAACCCCTTGTGAACTGTAATTGTATTTGGATAGTGTGTTCTTTCACGAGACGCCTGTCCGACCATTTAAACAACCCTATAATTTTTCTGATATTAGAGATAAAAGAGAAACAACTTTTGACAACGGATCTCTTGGCTCTC
>OTU_2399	AAGTCGTAACAAGGTCTCCGTTGGTGAACCAGCGGAGGGATCATTACCGAGTTTACAACTCCCAAAACCCCCTGTGAACATACCTACGTTGCTTCGGCGGTCCGTCCCGGCGCCCCCTCGCGGGGGCCCGGAACCCAGGCGCCCGCCGGAGGACCCCAAACTCTTGTTTCTAAAACCAGTATCTTCTGAGTTGAATAAGCAAACAAATTAAAACTTTCAACAACGGATCTCTTGGCTCTG
>OTU_24	AAGTCGTAACAAGGTTTCCGTAGGTGAACCTGCGGAAGGATCATTAACAACGTATCCTAAACGTAAAAAACCCCCCCTGTGAACTTTCATAACCCGAGCTTGCTAGGCCCGCGAAATTCAGCAATCCCTGGTAAATCATTGTGAACAGCTTTGAGTCAGAGACCTCTGAATAACCTTGCGCGGTCGCGGTTGGTGAGGCAAGTGACCTGGTACCCTCAAGACCAGTGTTCAATGATCTGTCAGTGTTCATTGACTGGAATCAAACGTTCTGTCAGTGTGCGTTTGATTTGCAAGGGTGGCGCAGTAAACGATCGCTGGAGGCCGACACGGCCGGCGACTGGGTCAGCGAGCTTTGCTCCCACTGTTACTACTTACAAGATTTCCCAATTAGTGAAAGCT…
>OTU_240	AAGTCGTAACAAGGTTTCCGTAGGTGAACCTGCGGAAGGATCATTACAACGTATCCGCGTACAAACTCGCGAACTGTTCCCCTGTAGAGTAAACAACTTGTGGATGAAGTTAATGGCTGAGAGTCTCTTTCTGATGGATTTCTGGATTTTTATCTGGAACTGGGAGCTCTCAGTCGCTGGCAAGAAATTGCTGGGACTTCGTTTACTCTGCTGCGGTATTGCCTCCCATCAGAGGTGTTGTATTAACCAATTTATTAACCCCATGTAAATTTTGAACTGAACTCTGTAGCCGAGTAACTGTCCTTGTTGGCTTCGGTCACGGACATGCTGCTCAGTTACTATCTTTATGAAATAAAGAACAACTCTTAACAACGGATATCTTGGTTCTC
>OTU_2400	AAGTCGTAACAAGGTCTCCGTTGGTGAACCAGCGGAGGGATCATTACAGAGTTGTGAAACTCTCACCATTGTAAACATTACCTTTACCGTTGCTTCGGTGGGTGGCTCCCTTTCGGGTGCCACGCCCTCCCTTCGGGGTAGGCAGCCCACCAGAGGTACACTAAACTCTCGTATTATTTGGCATCTCTGAGTAACTTATAAAATAAGTCAAAACTTTCAACAACGGATCTCTTGGTTCTG
>OTU_2401	AAGTCGTAACAAGGTTTCCGTAGGTGAACCTGCGGAAGGATCATTATCGAGCGAGGGTCCCCGCGGCCCGACCTCCCAACCCCGTGCCTACCTTACCTGTTGCTTCGGCGGGCCCGCCCCCGGGCCGCCAGGGGCTCGTCCCCCGGCCAGCGCCCGCCGAAGACCCAACGAACGCCTGGAAGTGCTGTCTGAGCAACTATGCAATAGTTAAAACTTTCAACAACGGATCTCTTGGTTCCG
>OTU_2402	AAGTCGTAACAAGGTCTCCGTTGGTGAACCAGCGGAGGGATCATTACCGAGTTATCCAACTCCCAAACCCCTGTGAACATACCTACGTTGCTTCGGCGGGTCGTCCCGCGGCGCGCCCTCGTGGCGTGACCCGGATCCAGGCGCCCGCCGGGGAACCCAAACTCTTGTCTTCCAGTATCTCTTCTGAGTGGCATAAGCAAAAATAAAACAAAACTTTCAGCAACGGATCTCTTGGTTCTG
>OTU_2403	AAGTCGTAACAAGGTTTCCGTAGGTGAACCTGCGGAAGGATCATTAAAGATTCGACCTTCGGGTCTATCTTCTCTTCAGCTGTGCGCTTCGGCTGCACGCTGTTGAATCTCACACACCTGTGCACACTTCGGTTGCAGTCGGTTAATTCTGGCTGCTTCCGCTTTTACATTTAACTACAAAGTCTAGAATGTCTAATACTATAAAAATAACAACTTTCAACAACGGATCTCTTGGCTCTC
>OTU_2404	AAGTCGTAACAAGGTTTCCGTAGGTGAACCTGCGGAAGGATCATTAAAGATTCTGACCTTCGGGTCTAACTTTTCAGCTGTGCGCTTCGGCTGCACGCTGATAAAACCTTACACACCTGTGCACATTTCGGTTGCAATCCTGCATGCAGGTTTGCTTCCGCTTTACATACAACCACATGTCTTGAATGTaaaaaaaaaCAATAAAAGTAACAACTTTCAACAACGGATCTCTTGGCTCTC
>OTU_2405	AAGTCGTAACAAGGTTTCCGTAGGTGAACCTGCGGAAGGATCATTACCGAGTGCGGGTCTGCCCTCCGGGGCGCCCAACCTCCCCCCCGTGAATACGTGACCCTGTTGCTTCGGCGGGGTGTCCTCCCCTTCCCGGGGGGGCCGCCGCCGGGGACCATTTAAACCCGAACCGAGTATGTTGCAGTCTGAGCTCGAGTGAGAAATCAGTCAAAACTTTCAACAATGGATCTCTTGGTTCCG
>OTU_2406	AAGTCGTAACAAGGTCTCCGTTGGTGAACCAGCGGAGGGATCATTACCGAGTTTACAAACTCCCAAACCCTTTGTGAACCTTACCATATTGTTGCTTCGGCGGGACCGCCCCGGCGCCTTCGGGCCCGGAACCAGGCGCCCGCCGGAGGCCCCAAACTCTTATGTCTTTAGTGGTTTTCTCCTCTGAGTGACACATAAACAAATAAATAAAAACTTTTAACAACGGATCTCTTGGCTCCA
>OTU_2407	AAGTCGTAACAAGGTCTCCGTTGGTGAACCAGCGGAGGGATCATTACTGAGTCTAACAAACTCCCAAACCCCTGTGAACATACCTACTGTTGCTTCGGCGGGATCGCCCCGGGCGCCTTCGCGGTGCCCCGGAACCAGGCGCCCGCCGGGGACATCAAACTCTTGATTGTTATAGTGGCATTCTCTGAGTAAAACATACAAATAAGTCAAAACTTTCAACAACGGATCTCTTGGCTCTGG
>OTU_2408	AAGTCGTAACAAGGTCTCCGTAGGTGAACCTGCGGAGGGATCATTACACAATATGAAGGCGGGCTGAAATCTCTCGAGAGGACAGCCTTGCTGAATTATTCACCCGTGTCTTTTGCGTACTTCTTGTTTCCTTGGTGGGCTCGCCCACCACAAGGACAAACCATAAACCTTTTGTAATTGCAATCAGCGTCAGTAACAAAATAATAATTACAACTTTCAACAACGGATCTCTTGGTTCTG
>OTU_2409	AAGTCGTAACAAGGTCTCCGTTGGTGAACCAGCGGAGGGATCATTACCGAGTTTACAAACTCCCAAACCCTTTGTGAACCTTACCATATTGTTGCTTCGGCGGGACTCGCCCCGGGTGTGCTCGCACCCCGGAACCAGGCGCCCGCCGAGGGACCCAAACTCTTGTCTTTACAGTGGGATATTCTGAGTAATTATACAAATAAGCAATCAAAACTTTCAACAACGGATCTCTTGGTTCTG
>OTU_2410	AAGTCGTAACAAGGTCTCCGTTGGTGAACCAGCGGAGGGATCATTACTGAGTGTAAAAACTCCCAAACCCTATGCAAACCTACCAAAGTTGCTTCGGCGGCCTACAATCGCCCCGGGCGCCCCCAAAGCGCCCCGGACCCAGGCGACCGCCGGAGGCCCCAAACTCCTGAATTACAGTGGATATTCTGAGTGGCATAAGCAAATAAATCAAAACTTTCAGCAACGGATCTCTTGGTTCTG
>OTU_2411	AAGTCGTAACAAGGTCTCCGTTGGTGAACCAGCGGAGGGATCATTACTGAGTGTAAAAACTCCCAAACCCATTGTGAACATACCACTGTTGCTTCGGCGGATGCGCCCCGGGCGCGCTCCTCACAGGGCGTGCCCCGGAACCAGGCGCCCGCCGGGGGACCGAAACTCTTGTTTTTATAGGATCTCTGAGTGTGATTATAAAATAAATCAAAACTTTCAACAACGGATCTCTTGGCTCTA
>OTU_2412	AAGTCGTAACAAGGTTTCCGTAGGTGAACCTGCGGAAGGATCATTACAGAGTAGAGGGTCCTTGCGGGCCCGCACTCCAACCCCTTGATTATAGACGTGGTTGCCTCGGCGGGCTGGAATCCCCTATCCGGGACGCCTTAAATGCCCGCCAGAGGACGCGGAAACTCCTGTCTAAATAGTGCAGTCTGAGCTTTGTAGAGCAACAAATTAAAACTTTCAACAACGGATCTCTTGGTTCTG
>OTU_2413	AAGTCGTAACAAGGTTTCCGTAGGTGAACCTGCGGAAGGATCATTACCGAGTGAGGGCCCTCTGGGTCCAACCTCCCACCCGTGTTTATCGTACCTTGTTGCTTCGGCGGGCCCGCCTCACGGCCGCCGGGGGGCTTCTGCCCTCGGGCCCGCGCCCGCCGAAGACACCATTGAACGCTGTCTGAAGATTGCAGTCTGAGCAATTAGCTAAAACTTTCAACAATGGATCTCTTGGTTCCG
>OTU_2414	AAGTCGTAACAAGGTATCCGTAGGTGAACCTGCGGATGGATCATTAGAAAGTGTTAGACGCGCAAGCGTCGACCACCTACTCTGTGCATCGTAACGTACCCTGGCGGGAGCCTGCGCAAGCGGCGACCGTCGAAGGGCAGATACCCCTCGGGGCGTCTGTTCCCAACAAACACATCAACCAAAGTCTGAAGCTAAAGAAACAATGTTAAACAACTTTTGACAACGGATCTCTTGGCTCTC
>OTU_2415	AAGTCGTAACAAGGTTTCCGTAGGTGAACCTGCGGAAGGATCATTAACGAGACTTGCCTTTTGGCAGACCTCCCACCCCCTGTGTACCGTACTTGTTGCTTTGGCAGGCCCGTCCCTCGGGGACCGCCGGCGTTCGCGCTGGCCCGCGCCTGCCAGAGGACCAAAAAAATCTTGTTTTACATGTCGTCTGAGTAAACTTTATAATAATTAAAACTTTCAACAACGGATCTCTTGGTTCTG
>OTU_2416	AAGTCGTAACAAGGTTTCCGTAGGTGAACCTGCGGAAGGATCATTAAAGAGACGTACGCCCTTCGGGGTATACCTCCCACCCTTTGTTTATATTACCTGTGTTGCTTTGGCTGACCTGCCCTTGGGCTCCCGGCTTCGGCTGGGTCGTGTCAGCCAGAGGAATATCAAACTCTGATTGTATTTATTGTCTGAGTAATAACTTAATAGTTAAAACTTTCAACAACGGATCTCTTGGTTCTG
>OTU_2417	AAGTCGTAACAAGGTTTCCGTAGGTGAACCTGCGGAAGGATCATTACTGCTTGCTCACGGCTTCGTTTCGGGCAACCGAGCGGGGCCGCGCATGCTACCCTTGCTTATGTATACCTATCGTTATTCCCTCGGCGGGGCGACCCGCCGCCGGGAGCGCATAAACACTCTTGTATCATAGCATCTAACTTCTGAAAACAACATAAATAATCACAACTTTTAACAATGGATCTCTTGGTTCTG
>OTU_2418	AAGTCGTAACAAGGTCTCCGTTGGTGAACCAGCGGAGGGATCATTACAGAGTTGCAAAACTCCCAAACCATTGTGAACGTTACCTACAACCGTTGCTTCGGCGGGCGGCCCCGGGACCTCCCGGAGCCCCTCGGCCCCCCAAGGGTGCCCGCCGGAGGCTCTAACTCTTGAATTCATGGCCTCTCTGAGTCTTCTGTACTGAATAAGTCAAAACTTTCAACAACGGATCTCTTGGTTCTG
>OTU_2419	AAGTCGTAACAAGGTTTCCGTAGGTGAACCTGCGGAAGGATCATTACCGAGCTCATGCCCTTCGGGGTAGACCTCCATCCTTGCATACAATACCTTTCGTTGCTTTGGCAGGCCGCCTCTCGCGAGCCACCGGCCCCGGCTGGTGCGTGCCTGCCAGAGAACCACAAATCCCGTGTCACAGGTGTCGTCTGAGTACCATACAAATAGTTAAAACTTTCAACAACGGATCTCTTGGTTCTG
[truncated: 2,514 more rows]
