# Supplementary material for: Fibrous ginseng root biomass induces soil microbiome degradation by enriching ginseng pathogens
Source: Research Square preprint supplement (doi:10.21203/rs.3.rs-5322233/v1), 2025-02-12
Supplement: Supplementary file 2 [file 6b4e388d900096d660314731.xlsx]

## Sheet: Sheet1
ID	PB1	PB2	PB3	Sap1	Sap2	Sap3	Bak1	Bak2	Bak3	GP1	GP2	GP3	Res1	Res2	Res3	CKS1	CKS2	CKS3	CKG1	CKG2	CKG3	F1	F2	F3	T1	T2	T3	R1	R2	R3	A1	A2	A3	TF1	TF2	TF3	RF1	RF2	RF3	AF1	AF2	AF3	CK1	CK2	CK3	CK+G1	CK+G2	CK+G3	TH01
OTU_1	0	0	0	0	0	0	0	0	0	0	0	0	0	0	0	0	0.00110441	0.0139325	0	0	0	0	0	0	0	0	0	0	0	0	0	0	0	0	8.49545e-05	8.49545e-05	0	0	0	0	0	0	0	0	0	8.49545e-05	0	0	0
OTU_10	0	0	0	0	4.24773e-05	0	0	0	0	0	0	0	0	0	0	0	0	0	0	0	0	0	0	0	0	0	0	0	0	0	0	4.24773e-05	0	0	0	0	0	0	0	0	0	0	0	0	0	0	0	0	4.24773e-05
OTU_100	0	0	0	0	0	0	0	0	0	0	0	0	0	0	0	8.49545e-05	0	0	0	0	0	0	0	0	0	0	4.24773e-05	0	0	0	0	0	0	0	4.24773e-05	8.49545e-05	0	0	0	0	0	0	0	0	0	0	0	0	0
OTU_1000	0	0	0	0	0	0	4.24773e-05	0	0	0	4.24773e-05	0	0	0	0	0	0	0	0	0	0	0	0	0	0	0	0	0	0	0	0	0	0	0	0	0	0	0	0	0	0	0	0	0	0	0	0	0	0
OTU_1001	0	0	0	0	0	0	0	0	0	0	0	0	0	0	0	0	0	0	0	0	0	0	0	0	0	0	0	0	0	0	0	0	0	0	0	0	0	0	0	0	0	0	0	0	0	0	0	0	0
OTU_1002	0	0	0	0	0	0	0	0	0	0	0	0	0	0	0	0	0	0	0	0	0	0	0	0	0	0	0	0	0	0	0	0	0	0	0	0	0	0	0	0	0	0	0	0	0.000254864	0	0	0	0
OTU_1003	0	0	0	0	0	0	0	0	0	0	0	0	0	0	0	0	0	0	0	0	0	0	0	0	0	0	0	0	0	0	0	0	0	0	0	0	0	0	0	0	0	0	4.24773e-05	0	0	0	0	0	0
OTU_1004	4.24773e-05	0	0	4.24773e-05	0	0	0	0	0	0	0	0	0	0	0	0	0	0	0	0	0	0	0	0	0	0	0	0	0	0	0	0	0	0	0	0	0	0	0	0	0	0	0	0	0	0	0	0	0
OTU_1005	0	0	0	0	0	0	0	0	0	0	0	0	0	0	0	0	0	0	0	0	0	0	0	0	0	0	0	0	0	0	0	0	0	0	0	0	0	0	0	0	0	0	0	0	0	0	0	0	0
OTU_1006	0	0	0	0	0	0	0	0	0	0	0	0	0	0	0	0	0	0	0	0	0	0	0	0	0	0	0	0	0	0	0	0	0	0	0	0	0	0	0	0	0	0	0	0	0	0	0	0	0
OTU_1007	0	0	4.24773e-05	0	0	4.24773e-05	0	0	0	0	0	0	0	0	0	8.49545e-05	0.000424773	0.000127432	4.24773e-05	0.000127432	0.000127432	0	0	0	0.000169909	0.000509727	0	0.00046725	4.24773e-05	0	0	0	8.49545e-05	0	4.24773e-05	0	0.00046725	4.24773e-05	0.000127432	4.24773e-05	4.24773e-05	0	0	4.24773e-05	0.000254864	0.000339818	0.000212386	0.000127432	4.24773e-05
OTU_1008	0	0	0	0	0	0	0	0	0	0	0	0	0	0	0	0	0	0	0	0	0	0	0	0	0	0	0	0	0	0	0	0	0	0	0	0	0	0	0	0	0	0	0	0	0	0	0	0	0
OTU_1009	0	0	0	0	0	0	0	0	0	0	0	0	0	0	0	0	0	0	0	0	0	0	0	0	0	0	0	0	0	0	0	0	0	0	0	0	0	0	0	0	0	0	4.24773e-05	0	0	0	0	4.24773e-05	4.24773e-05
OTU_101	0	0	0	0	0	0	0	0	0	0	0	0	0	0	0	0	0	0	0	0	0	0	0	0	0	0	0	0	0	0	0	0	0	0	0	0	0	0	0	0	0	0	0	0	0	0	0	0	0
OTU_1010	0	0	0	0	0	0	0	0	0	0	0	0	0	0	0	0	0	0	0	0	0	0	0	0	0	0	0	0	0	0	0	0	0	0	0	0	0	0	0	0	0	0	0	0	0	0	0	0	0
OTU_1011	0	0	0	0	0	0	0	0	0	0	0	0	0	0	0	0	0	0	0	0	0	0	0	0	0	0	0	0	0	0	0	0	0	0	0	0	0	0	0	0	0	0	0	0	0	0	0	0	0
OTU_1012	0	0	0	0	0	0	0	0	0	0	0	0	0	0	8.49545e-05	0	0	0	0	0	0	0	0	0	0	0	0	0	0	0	0	0	0	0	0	0	0	0	0	0	0	0	0	0	0	0	0	0	0
OTU_1013	0	0	0	0	0	0	0	0	0	0	0	0	0	0	0	0	0	0	0	0	0	0	0	0	0	0	0	0	0	0	0	0	0	0	0	0	0	0	0	0	0	0	0	0	0	0	0	0	0
OTU_1014	0	0	0	0	0	0	0	0	0	0	0	0	0	0	0	0	0	0	0	0	0	0	0	0	0	0	0	0	0	0	0	0	0	0	0	0	0	0	0	0	0	0	0	0	0	0	0	0	0
OTU_1015	0	0	0	0	0	0	0	0	0	0	0	0	0	0	0	0	0	0	0	0	0	8.49545e-05	0	0	0	0	4.24773e-05	0	4.24773e-05	8.49545e-05	0	0	0	4.24773e-05	0	0	0	0	0	0	0	0	0.000424773	0.000722114	0.000382295	0.00161414	0.00191148	0.00250616	0
OTU_1016	0	0	0.00046725	0.000424773	0	0	0.00046725	0.000552205	0.000254864	0.000976977	8.49545e-05	0.000254864	0.00046725	0	0.000212386	0	0	0.000339818	0	0	0	0.000339818	0	0.000297341	0.000254864	0.000297341	0	0.000382295	0	4.24773e-05	0.000637159	0	4.24773e-05	0.000212386	0	4.24773e-05	4.24773e-05	0.000212386	0.000127432	0	0.000382295	0	0.000382295	0	0	0	0	0.00191148	0.104706
OTU_1017	0	0	0	0	0	0	0	0	0	0	0	0	0	0	0	0	0	0	0	0	0	0	0	0	0	0	0	0	0	0	0	0	0	0	0	0	0	0	0	0	0	0	0	0	0	0	0	0	0
OTU_1018	0	0	0	0	0	0	0	0	0	0	0	0	4.24773e-05	0	0	0	0	0	0	0	0	0	0	0	0	0	0	0	0	0	0	0	0	0	0	0	0	0	0	0	0	0	0	0	0	0	0	0	0
OTU_1019	0	0	4.24773e-05	4.24773e-05	0	0	0	0	0	0	0	0	0	0	0	0	0	0	0	0	0	0	0	0	0	0	0	0	0	0	0	0	0	0	0	0	0	0	0	0	0	0	0	0	0	0.00114689	4.24773e-05	0.000594682	0
OTU_102	0	0	0	0	0	0	0	0	0	0	0	0	0	0	0	0	0	0	0	0	0	0	0	0	0	0	0	0	0	0	0	0	0	0	0	0	0	0	0	0	0	0	0	0	0	0	0	0	0
OTU_1020	0	0	0	4.24773e-05	0	0	0	0	4.24773e-05	0	0	0	0	0	0	0	0	0	0	0	0	0	0	0	0	0	0	0	0	0	0	0	0	0	0	0	0	0	0	0	0	0	0	0.000212386	0	0	0	0	0
OTU_1021	0	0	0	0	0	0	0	0	0	0	0	0	0	0	0	0	0	0	0	0	0	0	0	0	0	0	0	0	0	0	0	0	0	0	0	0	0	0	0	0	0	0	0	0	0	0	0	0	0
OTU_1022	0	0	0	0	0	0	0	0	0	0	0	0	0	0	0	0	0	0	0	0	0	0	0	0	0	0	0	0	0	0	0	0	0	0	0	0	0	0	0	0	0	0	0	0	0	0	0	0	0
OTU_1023	0	0	0	0	0	0	0	0	0	0	0	0	0	0	0	0	0	0	0	0	0	0	0	0	0	0	0	0	0	0	0	0	0	0	0	0	0	0	0	0	0	0	0	0	0	0	0	0	0
OTU_1024	0	0	0	4.24773e-05	0	0	0	0	0.000127432	0	0	0	0	0	0	0	0	0	0	0	0	0	0	0	0	0	0	0	0	0	0	0	0	0	0	0	0	0	0	0	0	0	0	0	0	0	0	0	0
OTU_1025	0	0	0	0	0	0	0	0	0	0	0	0	0	0	0	0	0	0	0	0	0	0	0	0	0	0	0	0	0	0	0	0	0	0	0	0	0	0	0	0	0	0	0	0	0	0	8.49545e-05	0	0
OTU_1026	0	0	0	0	0	0	0	0	0	0	0	0	0	0	0	0	0	0	0	0	0	0	0	0	0	0	0	0	0	0	0	0	0	0	0	0	0	0	0	0	0	0	4.24773e-05	0	4.24773e-05	0	0	0	0
OTU_1027	0	0	0	0	0	0	0	0	0	0	0	0	0	0	0	0	0	0	0	0	0	0	0	0	0	0	0	0	0	0	0	0	0	0	0	0	0	0	0	0	0	0	0	0	0	0	0	0	0
OTU_1028	0	0	0	0	0	0	0	0	0	0	0	0	0	0	0	0	0	0	0	0	0	0	0	0	0	0	0	0	0	0	0	0	0	0	0	0	0	0	0	0	0	0	0	0	0	0	0	0	0
OTU_1030	0	0	0	0	0	0	0	0	0	0	0	0	0	0	0	0	0	0	0	0.000254864	0	0	0	0	0	0	0	0	0	0	0	0	0	0	0	0	0	0	0	0	0	0	0	0	0	0	0	0	0
OTU_1032	0	0	0	0	0	0	0	0	0	0	0	0	0	0	0	0	0	0	0	0	0	0	0	0	0	0	0	0	0	0	0	0	0	0	0	0	0	0	0	0	0	0	0	0	0	0	0	0	0
OTU_1033	0	0	0	0	0	0	0	0	0	0	0	0	0	0	0	0	0	0	0	0	0	0	0	0	0	0	0	0	0	0	0	0	0	0	0	0	0	0	0	0	0	0	0	0	0	0	0	0	0
OTU_1034	0	0	0	0	0	0	0	0	0	0	0	0	0	0	0	0	0	0	0	0	0	0	0	0	0	0	0	0	0	0	0	0	0	0	0	0	0	0	0	0	0	0	0	0	0	0	0	0	0
OTU_1037	0	0	0	0	0	0	0	0	0	0	0	0	0	0	0	0	0	0	0	0	0	0	0	0	0	0	0	0	0	0	0	0	0	0	0	0	0	0	0	0	0	0	0	4.24773e-05	0	0	0	0	0
OTU_1038	0	0	0	0	0	0	0	0	0	0	0	0	0	0	0	0	0	0	0	0	0	0	0	0	0	0	8.49545e-05	0	4.24773e-05	0	0	0	0	0	0	0	0	0	0	0	0	0	0	0.000552205	0.000169909	0.000169909	0.000297341	8.49545e-05	0
OTU_1039	0	0	0	0	0	0	0	0	4.24773e-05	0	0	0	0	0	0	0	0	0	0	0	0	0	0	0	0	0	0	0	0	0	0	0	0	0	0	0	0	0	0	0	0	0	0	0	0	0	0	0	0
OTU_104	0	0	0	0	0	0	0	0	0	0	0	0	0	0	0	0	0	0	0	0	0	0	0	0	0	0	0	0	0	0	0	0	0	0	0	0	0	0	0	0	0	0	0	0	0	0	0	0	0
OTU_1041	0	0	0	0	0	0	0	0	0	0	0	0	0	0	0	0	0	0	0	0	0	0	0	0	0	0	0	0	0	0	0	0	0	0	0	0	0	0	0	0	0	0	0	0	0	0	0	0	0
OTU_1042	4.24773e-05	0	0	0	0	0	0	0	0	0	0	0	0	0	0	0	0	0	0	0	0	0	0	0	0	0	0	0	0	0	0	0	0	0	0	0	0	0	0	0	0	0	0	0	0	0	0	0	0
OTU_1043	0	0	0	4.24773e-05	0	4.24773e-05	0.00123184	0.000297341	4.24773e-05	0.000339818	0	0	4.24773e-05	0	4.24773e-05	0	0	0	0	0	0	0.000297341	0	0	0	0	0	0	0	0	0.000212386	0	0	0	0	0	0	0.000297341	0	0	0	0	0	0	0	0	0	0	0.000382295
OTU_1044	0	0	0	0.000169909	0	0	0	0	8.49545e-05	0	0	0	0	0	0	0	0	0	0	0	0	0	0	0	0	0	0	0	0	0	0	0	0	0	0	0	0	0	0	0	0	0	0	4.24773e-05	0	0	0	0	0
OTU_1045	0	0	0	0	0	0	0	0	0	0	0	0	0	0	0	0	0	0	0	0	0	0	0	0	0	0	0	0	0	0	0	0	0	0	0	0	0	0	0	0	0	0	0	0	0	0	0	0	0
OTU_1046	0	0	0	0	0	0	0	0	0	0	0	0	0	0	0	0	0	0	0	0	0	0	0	0	0	0	0	0	0	0	0	0	0	0	0	0	0	0	0	0	0	0	0	0	0	0	0	0	0
OTU_1047	0	0	0	0	0	0	0	0	0	0	0	0	0	0	0	0	0	0	0	0	0	0	0	0	0	0	0	0	0	0	0	0	0	0	0	0	0	0	0	0	0	0	0	0	0	0	0	0	0
OTU_1048	0	0	0	0	0	0	0	0	0	0	0	0	0	0	0	0	0	0	0	0	0	0	0	0	0	0	0	0	0	0	0	0	0	0	0	0	0	0	0	0	0	0	0	0	0	0	0	0	0
OTU_1049	0	0	0	0	0	0	0	0	0	0	0	0	0	0	0	0	0	0.000127432	0	0	0	0	0	0	0	0	0	0	0	0	0	0	0	0	0	0	0	0	0	0	0	0	0	0	0	0	0	0	0
OTU_105	0	0	0	0	0	0	0	0	0	0	0	0	0	0	0	0	0	0	0	0	0	0	0	0	0	0	0	0	0	0	0	0	0	0	0	0	0	0	0	0	0	0	0	0	0	0	0	0	0
OTU_1050	0	0	0	0	0	0	0	0	0	0	0	0	0	0	0	0	0	0	0	0	0	0	0	0	0	0	0	0	0	0	0	0	0	0	0	0	0	0	0	0	0	0	0	0	0	0	0	0	0
OTU_1051	0	0	0	0	0	0	0	0	0	0	0	0	0	0	0	0	0	0	0	0	0	0	0	0	0	0	0	0	0	0	0	0	0	0	0	0	0	0	0	0	0	0	0	0	0	0	0	0	0
OTU_1052	0	0	0	0	0	0	0	0	0	0	0	0	0	0	0	0	0	0	0	0	0	0	0	0	0	0	0	0	0	0	0	0	0	0	0	0	0	0	0	0	0	0	0	0	0	0	0	0	0
OTU_1053	0	0	0	0	0	0	0	0	0	0	0	0	0	0	0	0	0	0	0	0	0	0	0	0	0	0	0	0	0	0	0	0	0	0	0	0	0	0	0	0	0	0	0	0	0	0	0	0	0
OTU_1054	0	0	0	0	0	0	0	0	0	0	0	0	0	0	0	0	0	0	0	0	0	0	0	0	0	0	0	0	0	0	0	0	0	0	0	0	0	0	0	0	0	0	0	0	0	0	0	0	0
OTU_1055	0	0	0	0	0	0	0	0	0	0	0	0	0	0	0	0	0	0	0	0	0	0	0	0	0	0	0	0	0	0	0	0	0	0	0	0	0	0	0	0	0	0	0	0	0	0	0	0	0
OTU_1057	0	0	0	0	0	0	0	0	0	0	0	0	0	0	0	0	0	0	0	0	0	0	0	0	0	0	0	0	0	0	0	0	0	0	0	0	0	0	0	0	0	0	0	0	4.24773e-05	0	0	0	0
OTU_1058	0	0	0	0	0	0	0	0	0	0	0	0	0	0	0	0	0	0	4.24773e-05	0	0	0	0	0	0	0	0	0	0	0	0	0	0	0	0	0	0	0	0	0	0	0	0	0	0	0.000127432	8.49545e-05	8.49545e-05	0
OTU_1059	0	0	0	0	0	0	0	0	0	0	0	0	0	0	0	0	0	0	0	0	0	0	0	0	0	0	0	0	0	0	0	0	0	0	0	0	0	0	0	0	0	0	0	0	0	0	0	0	0
OTU_106	0	0	0	0	0	0	0	0	0	0	0	0	0	0	0	0	0	0	0	0	0	0	0	0	0	0	0	0	0	0	0	0	0	0	0	0	0	0	0	0	0	0	0	0	0	0	0	0	0
OTU_1061	0	0	0	0	0	0	0	0	0	0	0	0	0	0	0	0	0	0	0	0	0	0	0	0	0	0	0	0	0	0	0	0	0	0	0	0	0	0	0	0	0	0	0	0	0	0	0	0	0
OTU_1063	0	0	0	0	0	0	0	0	0	0	0	0	0	0	0	0	0	0	0	8.49545e-05	0	0	0	0	0	0	0	0	4.24773e-05	0	0	0	0	0	0	4.24773e-05	0	0	0	0	0	0	0	0	0	0	0	4.24773e-05	0
OTU_1064	0	0	0	0	0	0	0	0	0	0	0	0	0	0	0	0	0	0	0	0	0	0	0	0	0	0	0	0	0	0	0	0	0	0	0	0	0	0	0	0	0	0	0	0	0	0	0	0	0
OTU_1065	0	0	0	8.49545e-05	0	4.24773e-05	8.49545e-05	0	0	0.000254864	0.00110441	0.000297341	0.000254864	0.000339818	0.000552205	0	0	0	0	0	0	0	4.24773e-05	0	0	0	0	0	0	0	0	0	0	0	0	0	0	0	0	0	0	0	0	0	0	0	0	0	0
OTU_1066	0	0	0	0	0	0	0	0	0	0	0	0	0	0	0	0	0	0	0	0	0	0	0	0	0	0	0	0	0	0	0	0	0	0	0	0	0	0	0	0	0	0	0	0	0	0	0	0	0
OTU_1067	0	0	0	0	0	0	0	0	0	0	0	0	0	0	0	0	0	0	0	0	0	0	0	0	0	0	0	0	0	0	0	0	0	0	0	0	0	0	0	0	0	0	0	0	0	0	0	0	0
OTU_1068	0	0	0	0	0	0	4.24773e-05	0	4.24773e-05	0	0	0	0	0	0	0	0	0	4.24773e-05	0.000212386	0	4.24773e-05	0	0	0.000424773	0.000509727	0.000722114	0	0	0	0	0	4.24773e-05	0.000424773	0.000552205	0.000297341	0	0	0	0	0	0	0	0	0	0	0	0	0
OTU_1069	0	0	0	0	0	0	0	0	0	0	0	0	0	0	0	0	0	0	0	0	0	0	0	0	0	0	0	0	0	0	0	0	0	0	0	0	0	0	0	0	0	0	0	0	0	0	0	0	0
OTU_107	0	0	0	0	0	0	0	0	0	0	0	0	0	0	0	0	0	0	0	0	0	0	0	0	0	0	0	0	0	0	0	0	0	0	0	0	0	0	0	0	0	0	0	0	0	0	0	0	0
OTU_1070	0	0	0	0	0	0	0	0	0	0	0	0	0	0	0	0	0	0	0	0	0	0	0	0	0	0	0	0	0	0	0	0	0	0	0	0	0	0	0	0	0	0	0	0	0	0	0	0	0
OTU_1071	0	0	0	0	0	0	0	0	0	0	0	0	0	0	0	0	0	0	0	0	0	0	0	0	0	0	0	0	0	0	0	0	0	0	0	0	0	0	0	0	0	0	0	0	0	0	0	0	0
OTU_1072	4.24773e-05	0	0.00756095	8.49545e-05	0	0	0.000552205	0	0.000424773	0	4.24773e-05	4.24773e-05	0	4.24773e-05	0.00046725	0.000254864	0.000382295	8.49545e-05	0.000807068	0.00199643	0.00118936	0.000169909	0.000254864	0.000212386	0.0200493	0.0255713	0.0189873	0.000127432	0.000552205	0	0	4.24773e-05	0.000127432	0.0122335	0.0117662	0.0100671	0	0	0	4.24773e-05	8.49545e-05	0	0.000127432	8.49545e-05	0	0.000382295	0.000212386	0.000127432	0
OTU_1073	0	0	0	0	0	0	0	0	0	0	0	0	0	0	0	0	0	0	0	4.24773e-05	0	0	0	0	0	0	0	0	0	0	0	0	0	0	0	0	0	0	0	0	0	0	0	0	0	0	0	0	0
OTU_1074	0	0	0	0	0	0	0	0	0	0	0	0	0	0	0	0	0	0	0	0	0	0	0	0	0	0	0	0	0	0	0	0	0	0	0	0	0	0	0	0	0	0	0	0	0	0	0	0	0
OTU_1075	4.24773e-05	0	0	0	0	0	0	0	0	0	0	0	0	0	0	0	0	0	0	0	0	0	0	0	0	0	0	0	0	0	0	0	0	0	0	0	0	0	0	0	0	0	0.000169909	0.000424773	0.00237873	0	0	0	0
OTU_1076	0	0	0	0	0	0	0	0	0	0	0	0	0	0	0	0	0	0	0	0	0	0	0	0	0	0	0	0	0	0	0	0	0	0	0	0	0	0	0	0	0	0	0	0	0	0	0	0	0
OTU_1077	0	0	0	0	0	0	0	0	0	0	0	0	0	0	0	0	0	0	0	0	0	0	0	0	0	0	0	0	0	0	0	0	0	0	0	0	0	0	0	0	0	0	0	0	0	0	0	0	0
OTU_1078	0	0	0	0	0	0	0	0	0	0	0	0	0	0	0	0	0	0	0	0	0	0	0	0	0	0	0	0	0	0	0	0	0	0	0	0	0	0	0	0	0	0	0	0	0	0	0	0	0
OTU_108	0	0	0	0	0	0	0	0	0	0	0	0	0	0	0	0	0	0	0	0	0	0	0	0	0	0	0	0	0	0	0	0	0	0	0	0	0	0	0	0	0	0	0	0	0	0	0	0	0
OTU_1084	0	0	0	0	0	0	0	0	0	0	0	0	0	0	0	0	0	0	0	0	0	0	0	0	0	0	0	0	0	0	0	0	0	0	0	0	0	0	0	0	0	0	0	0	0	0	0	0	0
OTU_1085	0	0	0	0	0	0	0	0	0	0	0	4.24773e-05	0	0	0	0	0	0	0	0	0	0	0	0	0	0	0	0	0	0	0	0	0	0	0	0	0	0	0	0	0	0	0	0	0	0	0	0	0
OTU_1087	0	0	0	0	0	0	0	0	0	0	0	0	0	0	0	0	0	0	0	0	0	0	0	0	0	0	0	0	0	0	0	0	0	0	0	0	0	0	0	0	0	0	0	0	0	0	0	0	0
OTU_1089	0	0	0	0	0	0	0	0	0	0	0	0	0	0	0	0	0	0	0	0	0	0	0	0	0	0	0	0	0	0	0	0	0	0	0	0	0	0	0	0	0	0	0	0	0	0	0	0	0
OTU_109	0	0	0	0	0	0	0	0	0	0	0	0	0	0	0	4.24773e-05	0	0	0	0	0	0	0	0	0	0	0	0	0	0	0	0	0	0	0	0	0	0	0	0	0	0	0	0	0	0	0	0	0
OTU_1090	0	0	0	0	0	0	0	0	0	0	0	0	0	0	0	0	0	0	0	0	0	0	0	0	0	0	0	0	0	0	0	0	0	0	0	0	0	0	0	0	0	0	0	4.24773e-05	0	0	0	0	0
OTU_1091	4.24773e-05	0	0	0	0	4.24773e-05	0	0	0	0	0	0	0	0	0	0	0	0	0	0	0	0	0	0	0	0	0	0	0	0	0	0	0	0	0	0	0	0	0	0	0	0	0	0	0	0	0	0	0
OTU_1092	0	0	0	0	0	0	0	0	0	0	0	0	0	0	4.24773e-05	0	0	0	0	4.24773e-05	0	0	0	0	0	0	0	0	0	0	0	0	0	8.49545e-05	0	0	0	0	0	0	0	0	0	0	0	0	0	0	0
OTU_1093	0	0	0	0	0	0	0	0	0	0	0	0	0	0	0	4.24773e-05	0.00106193	0	0	4.24773e-05	0	0	0	0	0	0	0	0	0	0	0	0	0	4.24773e-05	0	0	0	0	0	0	0	0	0	0	0	0	0	0	0
OTU_1094	0	0	0	0	0	0	0	0	0	0	0	0	0	0	0	0	0	0	0	0	0	0	0	0	0	0	0	0	0	0	0	0	0	0	0	0	0	0	0	0	0	0	0	0	0	0	0	0	0
OTU_1095	0	0	0	0	0	0	0	0	0	0	0	0	0	0	0	0	0	0	0	0	0	0	0	0	0	0	0	0	0	0	0	0	0	0	0	0	0	0	0	0	0	0	0	0	0	0	0	0	0
OTU_1096	0	0	0	0	0	0	0	0	0	0	0	0	0	0	0	0	0	0	0	0	0	0	0	0	0	0	0	0	0	0	0	0	0	0	0	0	0	0	0	0	0	0	0	0	0	0	0	0	0
OTU_1097	0	0	0	0	0	0	0	0	0	0	0	0	0	0	0	0	0	0	0	0	0	0	0	0	0	0	0	0	0	0	0	0	0	0	0	0	0	0	0	0	0	0	0	0	0	0	4.24773e-05	0	0
OTU_1098	0	0	0	0	0	0	0	0	0	0	0	0	0	0	0	0	0	0	0	0	0	0	0	0	0	0	0	0	0	0	0	0	0	0	0	0	0	0	0	0	0	4.24773e-05	0	0	0	0	0	4.24773e-05	0
OTU_1099	0.0103645	0.0955314	8.49545e-05	0.000254864	0.00344066	0.0009345	0.00594682	0.000807068	0.00488489	0.0855917	0.00046725	0.00454507	0.000509727	0.000849545	0.000339818	0.00832555	0.00135927	0.00259111	0.00123184	8.49545e-05	0.000552205	0.000849545	8.49545e-05	0.000339818	0.000637159	0.000594682	0.000849545	0.00144423	0.00947243	0.0101521	0.00110441	0.00135927	0.000637159	0.000382295	0.000254864	0.000297341	0.0174157	0.0109591	0.0513975	0.000509727	0.00110441	0.000976977	0	0	0	4.24773e-05	0.000127432	0	0.000339818
OTU_11	0.000297341	0.000807068	0.00140175	0.00254864	0.000297341	0.0052247	0.00169909	0.292074	0.0041203	0.00547957	0.00199643	0.00259111	0.0033557	0.00178405	0.00276102	0.00106193	0.0097273	0.00501232	0.0976977	0.0387818	0.0384844	0.00526718	0.000849545	0.0009345	0.0042902	0.00140175	0.00390791	0.00365305	0.00271855	0.00305836	0.00369552	0.00760343	0.00250616	0.0014867	0.00479993	0.00305836	0.000807068	0.00564948	0.0014867	0.000722114	0.00135927	0.000807068	0.0168635	0.0229802	0.0312208	0.0470648	0.050548	0.0482967	0.00310084
OTU_110	0	0	0	0	0	0	0	0	0	0	0	0	0	0	0	0.0013168	0	0.000169909	0	0	0	0	0	0	0	0	0	0	0	0	4.24773e-05	0	4.24773e-05	4.24773e-05	0	0	0	0	0	0	0	0	0	0	0	0	0	0	0
OTU_1100	0	0	0	0	0	0	0	0	0	0	0	0	0	0	0	0	0	0	0	0	0	0	0	0	4.24773e-05	0	0	0	0	0	0	0	0	0	0	0	0	0	0	0	0	0	0.000509727	0	0	0	0	0	0
OTU_1101	0	0	0	0	0	4.24773e-05	0.000169909	0	0	0	0	4.24773e-05	0	0	0.000127432	0	0	0	0	0	0	0	0	0	0	0.000127432	0	0	0	0	0	0	4.24773e-05	4.24773e-05	0	0	0	0	8.49545e-05	0	0	0	0	0	0	0	0	0	0
OTU_1102	0	0	0	0	0	0	0	0	0	0	0	0	0	0	0	0	0	0	0	0	0	0	0	0	0	0	0	0	0	0	0	0	0	0	0	0	0	0	0	0	0	0	0	0	0	0	0	0	0
OTU_1103	0	0	0	0	0	0	0	0	0	0	0	0	0	0	0	0	0	0	0	0	0	0	0	0	0	0	0	0	0	0	0	0	0	0	0	0	0	0	0	0	0	0	0	0.000254864	0	0	0	0	0
OTU_1105	0	0	0	0	0	0	0	0	0	0	0	0	0	0	0	0	0	0	0	0	0	0	0	0	0	0	0	0	0	0	0	0	0	0	0	0	0	0	0	0	0	0	0	0	0	0	0	0	0
OTU_1106	0	0	4.24773e-05	0	0	0	8.49545e-05	0	4.24773e-05	8.49545e-05	0	4.24773e-05	0.000169909	0	0.000127432	0	0	4.24773e-05	0	0	0	0.000212386	0	0.000127432	0	0	0	4.24773e-05	0	0	4.24773e-05	0	0	0	0	0	0	4.24773e-05	4.24773e-05	0	8.49545e-05	0	0.00127432	0.00407782	0	8.49545e-05	0.000127432	0.000552205	0.0146547
OTU_1108	0	0	0	0	0	0	0	0	0	0	0	0	0	0	0	0	0	0	0	0	0	0	0	0	0	0	0	0	0	0	0	0	0	0	0	0	0	0	0	0	0	0	0	0	0	0	0	0	0
OTU_1109	0	0	0	0	0	0	0	0	0	0	0	0	0	0	0	0	0	0	0	0	0	0	0	0	0	0	0	0	0	0	0	0	0	0	0	0	0	0	0	0	0	0	0	0	4.24773e-05	0	0	0	0
OTU_1110	0	0	0	0	0	0	0	0	0	0	0	0	0	0	0	0	0	0	0	0	0	0	0	0	0	0	0	0	0	0	0	0	0	0	0	0	0	0	0	0	0	0	4.24773e-05	4.24773e-05	0.000424773	0	0	0	0
OTU_1112	0	0	0	0	0	0	0	0	0	0	0	0	0	0	0	0	0	0	0	0	0	0	0	0	0	0	0	0	0	0	0	0	0	0	0	0	0	0	0	0	0	0	0	0	0	0	0	0	0
OTU_1113	0	0	0	0	0	0	0	0	0	0	0	0	0	0	0	0	0	0	0	0	0	0	0	0	0	0	0	0	0	0	0	0	0	0	0	0	0	0	0	0	0	0	0	0	0	0	0	0	0
OTU_1116	0	0	0	0	0	0	0	0	0	0	0	0	0	0	0	0	0	0	0	0	0	0	0	0	0	0	0	0	0	0	0	0	0	0	0	0	0	0	0	0	0	0	0	0	0	0	0	0	0
OTU_1117	0	0	0	0	0	0	0	0	0	0	0	0	0	0	0	0	0	0	0	0	0	0	0	0	0	0	0	0	0	0	0	0	0	0	0	0	0	0	0	0	0	0	0	0.000127432	0	0	0	0	0
OTU_1119	0	0	0	0	0	0	0	0	0	0	0	0	0	0	0	0	0	0	0	0	0	0	0	0	0	0	0	0	0	0	0	0	0	0	0	0	0	0	0	0	0	0	0	0	0	0	0	0	0
OTU_112	0	0	0	0	0	0	0	0	0	0	0	0	0	0	0	0	0	0	0	0	0	0	0	0	0	0	0	0	0	0	0	0	0	0	0	0	0	0	0	0	0	0	0	0	0	0	0	0	0
OTU_1120	0	0	0	0	0	0	0	0	0	0	0	0	0	0	0	0	0	0	0	0	0	0	0	0	0	0	0	0	0	0	0	0	0	0	0	0	0	0	0	0	0	0	0.000297341	0	0.000254864	4.24773e-05	0	0	0
OTU_1121	0	0	0	0	0	0	0	0	0	0	0	0	0	0	0	0	0	0	0	0	0	0	0	0	0	0	0	0	0	0	0	0	0	0	0	0	0	0	0	0	0	0	0	0	0	0	0	0	0
OTU_1122	0	0	0	4.24773e-05	0	0	0	0	0	0	0	0	0	0	0	0	0	0	0	0	0	0	0	0	0	0	0	0	0	0	0	0	0	0	0	0	0	0	0	0	0	0	0	0	0	0	0	0	0
OTU_1123	0	0	0	0	0	0	0	0	0	0	0	0	0	0	0	0	4.24773e-05	0	0	0	0	0	0	0	0	0	0	0	0	0	0	0	0	0	0	0	0	0	0	0	0	0	8.49545e-05	0	0	4.24773e-05	4.24773e-05	4.24773e-05	0
OTU_1124	0	0	0	0	0	0	0	0	0	0	0	0	0	0	0	0	0	0	0	0	0	0	0	0	0	0	0	0	0	0	0	0	0	0	0	0	0	0	0	0	0	0	0	0	0	0	0	0	0
OTU_1125	0	0	0	0	0	0	0	0	0	0	0	0	0	0	0	0	0	0	0	0	0	0	0	0	0	0	0	0	0	0	0	0	0	0	0	0	0	0	0	0	0	0	0	0	0	0	0	0	0
OTU_1126	0	0	0	0	0	0	0	0	0	0	0	0	0	0	0	0	0	0	0	0	0	0	0	0	0	0	0	0	0	0	0	0	0	0	0.000212386	0	0	0	0	0	0	0	0	0	0	0	0	0	0
OTU_1127	0	0	0	0	0	4.24773e-05	0	0	0	0	0	0	0	0	0	0	0	0	0	0	0	0	0	0	0	0	0	0	0	0	0	0	0	0	0	0	0	0	0	0	0	0	0	0	0	0	0	0	0
OTU_1128	0	0	0	0	0	0	0	0	0	0	0	0	0	0	0	0	0	0	0	0	0	0	0	0	0	0	0	0	0	0	0	0	0	0	0	0	0	0	0	0	0	0	0	0	0	0	0	0	0
OTU_1129	0	0	0	0	0	0	0	0	0	0	0	0	0	0	0	0	0	0	0	0	0	0	0	0	0	0	0	0	0	0	0	0	0	0	0	0	0	0	0	0	0	0	0	0	0	0	0	0	0
OTU_113	0	0	0	0	0	0	4.24773e-05	0	0	0	0	0	0	0	0	0	0	0	0	0	0	0	4.24773e-05	0	0	4.24773e-05	0	0	0	0	0	4.24773e-05	0	0	0	0	0	0	0	0	0	0	0	0	0	0	0	0	0
OTU_1130	0	0	0	0	0	0	0	0	0	0	0	0	0	0	0	0	0	0	0	0	0	0	0	0	0	0	0	0	0	0	0	0	0	0	0	0	0	0	0	0	0	0	0	0	0	0	0	0	0
OTU_1131	0	0	0	0	0	0	0	0	0	0	0	0	0	0	0	0	0	0	0	0	0	0	0	0	0	0	0	0	0	0	0	0	0	0	0	0	0	0	0	0	0	0	0	0	0	0	0	0	0
OTU_1132	0	0	0	0	0	0	0	0	0	0	0	0	0	0	0	0	0	0	0	0	0	0	0	0	0	0	0	0	0	0	0	0	0	0	0	0	0	0	0	0	0	0	0	0	0	0	0	0	0
OTU_1133	0	0	0	4.24773e-05	0	0.000127432	0	0	0	0	0	0	0	0	0	0	0	0	0	0	0	0	0	0	0	0	0	0	0	0	0	0	0	0	0	0	0	8.49545e-05	0	0	0	0	0.000637159	0.0009345	0.000976977	0.000892023	0.000892023	0.000892023	0.00263359
OTU_1134	0	0	0	0	0	0	0	0	0	0	0	0	0	0	0	0	0	0	0	0	0	0	0	0	0	0	0	0	0	0	0	0	0	0	0	0	0	0	0	0	0	0	0	0	0	0	0	0	0
OTU_1136	0	0	0	0	0	0	0	0	0	0	0	0	0	0	0	0	0	0	0	0	0	0	0	0	4.24773e-05	0	0	0	0	0	0	0	0	0	0	0	0	0	0	0	0	0	0.000169909	0	0	0	0	0	0
OTU_1137	0	0	0	0	0	0	0	0	0	0	0	0	0	0	0	0	0	0	0	0	0	0	0	0	0	0	0	0	0	0	0	0	0	0	0	0	0	0	0	0	0	0	0	0	0	0	0	0	0
OTU_1138	8.49545e-05	0	8.49545e-05	0.000169909	0	8.49545e-05	4.24773e-05	0	0	0	0	0	0	0	0	0	0	0	0	4.24773e-05	0	0	0	0	0	0	0	0	0	4.24773e-05	0	0	0	0	0	0	0	0	4.24773e-05	0	0	0	4.24773e-05	4.24773e-05	0	4.24773e-05	4.24773e-05	0	0
OTU_1139	0	0	0	0	0	0	0	0	0	0	0	0	0	0	0	0	0	0	0	0	0	0	0	0	0	0	0	0	0	0	0	0	0	0	0	0	0	0	0	0	0	0	0	0	0	0	0	0	0
OTU_114	0	0	0	0	0	0	0	0	4.24773e-05	0	0	0	0	0	0	0	0	0	0	0	0	0	0	0	0	0	0	0	0	0	0	0	0	0	0	0	0	0	0	0	0	0	0	0	0	0	0	0	0
OTU_1140	0	0	0	0	0	0	0	0	0	0	0	0	0	0	0	0	0	0	0	0	0	0	0	0	0	0	0	0	0	0	0	0	0	0	0	0	0	0	0	0	0	0	0	0	0	0	0	0	0
OTU_1142	0	0	0	0	0	0	0	0	0	0	0	0	0	4.24773e-05	0	0	0	0	0	0	0	0	0	0	0	0	0	0	0	0	0	0	0	0	0	0	0	0	0	0	0	0	0	0	0	0	0	0	0
OTU_1143	0	0	0	0	0	0	0	0	0	0	0	0	0	0	0	0	0	0	0	0	0	0	0	0	0	0	0	0	0	0	0	0	0	0	0	0	0	0	0	0	0	0	0	0	0	0	0	0	0
OTU_1144	0	0	0	0	0	0	0	0	0	0	0	0	0	0	0	0	0	0	0	0	0	0	0	0	0	0	0	0	0	0	0	0	0	0	0	0	0	0	0	0	4.24773e-05	0	0	0	0	0	0	0	0
OTU_1145	0	0	0	0	0	0	0	0	0	0	0	0	4.24773e-05	0	4.24773e-05	0	0	0	0	0	0	0	0	0	0	0	0	0	0	0	0	0	0	0	0	0	0	0	0	0	0	0	0	0	0	0	0	0	0
OTU_1146	0	0	0	0	0	0	0	0	0	0	0	0	8.49545e-05	0	4.24773e-05	0	0	0	0	0	0	0	0	0	0	0	0	0	0	0	0	0	0	0	0	0	0	0	0	0	0	0	0	0	0	0	0	0	0
OTU_1147	0	0	0	0	0	0	0	0	0	0	0	0	0	0	0	0	0	0	0	0	0	0	0	0	0	0	0	0	0	0	0	0	0	0	0	0	0	0	0	0	0	0	0	0	0	0	0	0	0
OTU_1148	0	0	0	0	0	0	0	0	0	0	0	0	0	0	0	0	0	0	0	0	0	0	0	0	0	0	0	0	0	0	0	0	0	0	0	0	0	0	0	0	0	0	0	0	0	0	0	0	0.000169909
OTU_115	0	0	0	0	0	0	0	0	0	0	0	0	0	0	0	0.000849545	0	0.000127432	0	0	0	0	0	0	0	0	0	0	0	0	4.24773e-05	0	0	4.24773e-05	0	0	0	0	0	0	0	0	0	0	0	0	0	0	0
OTU_1151	0	0	0	0.000594682	0	0	0	0	0.000382295	4.24773e-05	4.24773e-05	0	0	8.49545e-05	4.24773e-05	0	0	0	0	0	0	0	0	0	0	0	0	4.24773e-05	0	0	4.24773e-05	4.24773e-05	0	0	0	0	0	0	0	4.24773e-05	0	0	0	0	0	0	0	0	0
OTU_1152	0	0	0	0	0	0	0	0	0	0	0	0	0	0	0	0	0	0	0	0	0	0	0	0	0	0	4.24773e-05	0	0	0	0	0	0	0	0	0	0	0	0	0	0	0	4.24773e-05	0	0	0	8.49545e-05	4.24773e-05	0
OTU_1153	0	0	0	0	0	0	0	0	0	0	0	0	0	0	0	0	0	0	0	0	0	0	0	0	0	0	0	0	0	0	0	0	0	0	0	0	0	0	0	0	0	0	0	0	0	0	0	0	0
OTU_1154	0	0	0	0	0	0	0	0	0	0	0	0	0	0	0	0	0	0	0	0	0	0	0	0	0	0	0	0	0	0	0	0	0	0	0	0	0	0	0	0	0	0	0	0	0	0	0	0	0
OTU_1155	0	0	0	0	0	0	0	0	0	0	0	0	0	0	0	0	0	0	0	0	0	0	0	0	0	0	0	0	0	0	0	0	0	0	0	0	0	0	0	0	0	0	0	0	0	0	0	0	0
OTU_1156	0	0	0	0	0	0	0	0	0	0	0	0	0	0	0	0	0	0	0	0	0	0	0	0	0	0	0	0	0	0	0	0	0	0	0	0	0	0	0	0	0	0	0	0	0	0	0	0	0
OTU_1157	0	0	0	0	0	0	0	0	0	0	0	0	0	0	0	0	0	0	0	0	0	0	0	0	0	0	0	0	0	0	0	0	0	0	0	0	0	0	0	0	0	0	0	0	0	0	0	0	0
OTU_1158	0	0	0	0	0	0	0	0	0	0	0	0	0	0	0	0	0	0	0	0	0	0	0	0	0	0	0	0	0	0	0	0	0	0	0	0	0	0	0	0	0	0	0	0	0	0	0	0	0
OTU_1159	0	0	0	0	0	0	0	0	0	0	0	0	0	0	0	0	0	0	0	0	0	0	0	0	0	0	0	0	0	0	0	0	0	0	0	0	0	0	0	0	0	0	0	0	0	0	0	0	0
OTU_116	0	0	0	0	0	0	0	0	0	0	0	0	0	0	0	0.000637159	0	0	0	0	0	0	0	0	0	0	0	0	0	0	0	0	0	0	0	0	4.24773e-05	0	0	0	0	0	0	0	0	0	0	0	0
OTU_1160	0	0	0	0	0	0	0	0	0	0	0	0	0	0	0	0	0	0	0	0	0	0	0	0	0	0	0	0	0	0	0	0	0	0	0	0	0	0	0	0	0	0	0	0	0	0	0	0	0
OTU_1161	8.49545e-05	0	4.24773e-05	4.24773e-05	0	4.24773e-05	4.24773e-05	0	4.24773e-05	0.000127432	0	4.24773e-05	0	0	0	4.24773e-05	0.000212386	0.000637159	0.000297341	0.000339818	8.49545e-05	0	0	0.000127432	0.000127432	0	0	0	0.000169909	4.24773e-05	0	0	0	0	8.49545e-05	0.000212386	8.49545e-05	8.49545e-05	8.49545e-05	4.24773e-05	0	0.000127432	0.000552205	0.00157166	0.00046725	0.00649902	0.00717866	0.00696627	8.49545e-05
OTU_1162	0	0	0	0	0	0	0	0	0	0	0	0	0	0	0	0	0	0	0	0	0	0	0	0	0	0	0	0	0	0	0	4.24773e-05	0	0	0	0	0	0	0	0	0	0	0	0	0	0	0	0	0
OTU_1163	0	0	0	0	0	0	0	0	0	0	0	0	0	0	0	0	0	0	0	0	0	0	0	0	0	0	0	0	0	0	0	0	0	0	0	0	0	0	0	0	0	0	0	0	0	0	0	0	0
OTU_1164	0	0	0	0	0	0	0	0	0	0	0	0	0	0	0	0	0	0	0	0	0	0	0	0	0	0	0	0	0	0	0	0	0	0	0	0	0	0	0	0	0	0	0	0	0	0	0	0	0
OTU_1166	0	0	0	0	0	0	0	0	0	0	0	0	0	0	0	0	0	0	0	0	0	0	0	0	0	0	0	0	0	0	0	0	0	0	0	0	0	0	0	0	0	0	0	0	0	0	0	0	0
OTU_1168	0	0	0	0	0	0	0	0	0	0	0	0	0	0	0	0	0	0	0	0	0	0	0	0	0	0	0	0	0	0	0	0	0	0	0	0	0	0	0	0	0	0	0	0	0	0	0	0	0
OTU_1169	0	0	0	0	0	0	0	0	0	0	0	0	0	0	0	0	0	0	0	0	0	0	0	0	0	0	0	0	0	0	0	0	0	0	0	0	0	0	0	0	0	0	0	0	4.24773e-05	0	0	0	0
OTU_117	0	0	0	0	0	0	0	0	0	0	0	0	0	0	0	0	0	0	0	0	0	0	0	0	0	0	0	0	0	0	0	0	0	0	0	0	0	0	0	0	0	0	0	0	0	0	0	0	0
OTU_1172	0	0	0	0	0	0	0	0	0	4.24773e-05	0	0	0	0	0	0	0	0	0	0	0	0	0	0	0	0	0	0	0	0	0	0	0	0	0	0	0	0	0	0	0	0	0	0	0	0	0	0	0
OTU_1174	0	0	0	0	0	0	0	0	0	0	0	0	0	0	0	0	0	0	0	0	0	0	0	0	0	0	0	0	0	0	0	0	0	0	0	0	0	0	0	0	0	0	0	0	0	0	0	0	0
OTU_1175	0	0	0	0	0	0	0	0	0	0	0	0	0	0	0	0	0	0	0	4.24773e-05	0	0	0	0	0	0	0	0	4.24773e-05	0	0	0	0	0	0	0	0	0	0	0	0	0	0	0	0	0.000169909	0.000509727	0.000169909	0
OTU_1176	0	0	0	0	0	0	0	0	0	0	0	0	0	0	0	0	0	0	0	0	0	0	0	0	0	0	0	0	0	0	0	0	0	0	0	0	0	0	0	0	0	0	0.000509727	0.000297341	0.000637159	0	0	0	0
OTU_1177	0	0	0	0	0	0	0	0	0	0	0	0	0	0	0	0	0	0	0	0	0	0	0	0	0	0	0	0	0	0	0	0	0	0	0	0	0	0	0	0	0	0	0	0	0	0	0	0	0
OTU_1178	0	0	0	0	0	0	0	0	0	0	0	0	0	0	0	0	0	0	0	0	0	0	0	0	0	0	0	0	0	0	0	0	0	0	0	0	0	0	0	0	0	0	0	0	0	0	0	0	0
OTU_1179	0	0	0	0	0	0	0	0	0	0	0	0	0	0	0	0	0	0	0	0	0	0	0	0	0	0	0	0	0	0	0	0	0	0	0	0	0	0	0	0	0	0	0	0	0	0	0	0	0
OTU_118	0	0	0	0	0	0	0	0	0	0	0	0	0	0	0	0.000382295	0	8.49545e-05	0	0	0	0	0	0	0	0	0	0	0	0	0	0	0	0	0	0	0	0	0	0	0	0	0	0	0	0	0	0	0
OTU_1180	0	0	0	0	0	0	0	0	0	0	0	0	0	0	0	0	0	0	0	0	0	0	0	0	0	0	0	0	0	0	0	0	0	0	0	0	0	0	0	0	0	0	0	0	0	0	0	0	0
OTU_1181	0	0	0	0	0	0	0	0	0	0	0	0	0	0	0	0	0	0	0	0	0	0	0	0	0	0	0	0	0	0	0	0	0	0	0	0	0	0	0	0	0	0	0	0	0	0	0	0	0
OTU_1182	0	0	0	0	0	0	0	0	0	0	0	0	0	0	0	0	0	0	0	0	0	0	0	0	0	0	0	0	0	0	0.000127432	4.24773e-05	0	0	0	0	0	0	0	0	0	0	0	0	0	0	0	0	0
OTU_1183	0	0	0	0	0	0	0	0	0	0	0	0	0	0	0	0	0	0	4.24773e-05	0	0	0	0	0	0	4.24773e-05	0	0	0	0	0	0	0	0	0	4.24773e-05	4.24773e-05	0	0	4.24773e-05	0	4.24773e-05	0	0	0	0	0	0	0
OTU_1184	0	0	0	0	0	0	0	0	0	0	0	0	0	0	0	0	0	0	0	0	0	0	0	0	0	0	0	0	0	0	0	0	0	0	0	0	0	0	0	0	0	0	0	0	0	0	0	0	0
OTU_1185	0	0	0	0	0	0	0	0	0	0	0	0	0	0	0	0	0	0	0	0	0	0	0	0	0	0	0	0	0	0	0	0	0	0	0	0	0	0	0	0	0	0	0	0	0	0	0	0	0
OTU_1186	0	0	0	0	0	0	0	0	0	0	0	0	0	0	0	0	0	0	0	0	0	0	0	0	0	0	0	0	0	0	0	0	0	0	0	0	0	0	0	0	0	0	0	8.49545e-05	0	0	0	0	0
OTU_1187	0	0	0	0	0	0	0	0	0	0	0	0	0	0	0	0	0	0	0	0	0	0	0	0	0	0	0	0	0	0	0	0	0	0	0	0	0	0	0	0	0	0	0	0	0	0	0	0	0
OTU_119	0	0	0	0	0	0	0	0	0	0	0	0	0	0	0	0.000254864	0	0	0	0	0	0	0	0	0	0	0	0	0	0	4.24773e-05	0	0	0	0	0	4.24773e-05	0	0	0	0	0	0	0	0	0	0	0	0
OTU_1190	0	0	8.49545e-05	0	0.000212386	0	0	0	0	0	0	0	0	0	0	0	0	0	0	0	0	0	0	0	0	0	0	0	0	0	0	0	0	0	0	0	0	0	0	0	0	0	0	0	0	0	0	0	0
OTU_1191	0	0	0	0	0	0	0	0	0	0	0	0	0	0	0	0	0	0	0	0	0	0	0	0	0	0	0	0	0	0	0	0	0	0	0	0	0	0	0	0	0	0	0	0	0	0	0	0	0
OTU_1192	0	0	0	0	0	0	0	0	0	0	0	0	0	0	0	0	0	0	0	0	0	0	0	0	0	0	0	0	0	0	0	0	0	0	0	0	0	0	0	0	0	0	0	0	0	0	0	0	0
OTU_1193	0	0	0	0	0	0	0	0	0	0	0	0	0	0	0	0	0	0	0	0	0	0	0	0	0	0	0	0	0	0	0	0	0	0	0	0	0	0	0	4.24773e-05	0	0	0	0	0	0	0	0	0
OTU_1194	0	0	0	0	4.24773e-05	8.49545e-05	0	0	0	0	0	0	0	0	0	0	0.000297341	0	0	8.49545e-05	4.24773e-05	0	0	0	0.000127432	0	0	0	0	0	0	0	0	0	0	0	0	0	0	0	0	0	0.0231926	0.000382295	0	0.000382295	0.000212386	0	0
OTU_1195	0	0	0	0	0	0	0	0	0	4.24773e-05	0	0	0	0	0	0	0	0	0	0	0	0	0	0	0	0	0	0	0	0	0	0	0	0	0	0	0	4.24773e-05	0	0	0	0	0	0	0	0	0	0	0
OTU_1196	0	0	0	0	0	0	0	0	0	0	0	0	0	0	0	0	0	0	0	0	0	0	0	0	0	0	0	0	0	0	0	0	0	0	0	0	0	0	0	0	0	0	0	0	0	0	4.24773e-05	0	0
OTU_1197	0	0	0	0	0	0	0	0	0	0	0	0	0	0	0	0	0	0	0	0	0	0	0	0	0	0	0	0	0	0	0	0	0	0	0	0	0	0	0	0	0	0	0	0	0	0	0	0	0
OTU_1199	0	0	0	0	0	0	0	0	0	0	0	0	0	0	0	0	4.24773e-05	0	0	0	0	0	0	0	0	0	0	0	0	0	0	0	0	0	0	0	0	0	0	0	0	0	0	0	0	0	0	0	0
OTU_12	0	0	0	0	0	0	0	0	0	0	0	0	0	0	0	0	0	0	0	0	0	0	0	0	0	0	0	0	0	0	0	0	0	0	0	0	0	0	0	0	0	0	0	0	0	0	0	0	0
OTU_120	0	0	0	0	0	0	0	0	0	0	0	0	0	0	0	0	0	0	0	0	0	0	0	0	0	0	0	0	0	0	0	0	0	0	0	0	0	0	0	0	0	0	0	0	0	0	0	0	0
OTU_1200	0	0	0	0	0	0	0	0	0	0	0	0	0	0	0	0	0	0	0	0	0	0	0	0	0	0	0	0	0	0	0	0	0	0	0	0	0	0	0	0	0	0	0	0	8.49545e-05	0	0	0	0
OTU_1201	0	0	0	0	0	0	0	0	0	0	0	0	0	0	0	0	0	0	0	0	0	0	0	0	0	0	0	0	0	0	0	0	0	0	0	0	0	0	0	0	0	0	0	0	0	0	0	0	0
OTU_1202	0	0	0	0	0	0	0	0	0	0	0	0	0	0	0	0	0	0	0	0	0	0	0	0	0	0	0	0	0	0	0	0	0	0	0	0	0	0	0	0	0	0	0	0	0	0	0	0	0
OTU_1203	0	0	0	0	0	0	0	0	0	0	0	0	0	0	0	0	0	0	0	0	0	0	0	0	0	0	0	0	0	0	0	0	0	0	0	0	0	0	0	0	0	0	0	0	0	0	0	0	0
OTU_1204	8.49545e-05	0	0.000169909	0	0	0	0	0	0	0	0	0	0	4.24773e-05	0	0	4.24773e-05	0	0	0	0	0	0	0	0	0	0	0	4.24773e-05	0	0	0	0	0	0	0	0	0	0	0	0	0	0.000127432	0	0	0	8.49545e-05	0	0
OTU_1205	0	0	4.24773e-05	0	0	0	0	0	0	0	0	0	0	0	0	0	0	0	0	0	0	0	0	0	0	0	0	0	0	0	0	0	0	0	0	0	0	0	0	0	0	0	0	0	0	0	0	0	0
OTU_1206	0	0	0	0	0	0	0	0	0	0	0	0	0	0	0	0	0	0	0	0	0	0	0	0	0	0	0	0	0	0	0	0	0	0	0	0	0	0	0	0	0	0	0	0	0	0	0	0	0
OTU_1207	0	0	0	0	0	0	0	4.24773e-05	0	0	0	0	0	0	4.24773e-05	0	0	0	0	0	0	0	0	0	0	0	0	0	0	0	4.24773e-05	0	0	0	0	4.24773e-05	4.24773e-05	0	0	0	0	0	0	0	0	0.000254864	0	4.24773e-05	0.00267607
OTU_1208	0	0	0	0	0	0	0	0	0	0	0	0	0	0	0	0	0	0	0	0	0	0	0	0	0	0	0	0	0	0	0	0	0	0	0	0	0	0	0	0	0	0	0	0	0	0	0	0	0
OTU_121	0	0	0	0	0	0	0	0	0	0	0	0	0	0	0	0	0	0	0	0	0	0	0	0	0	0	0	0	0	0	0	4.24773e-05	0	0	0	0	0	0	0	0	0	0	0	0	0	0	0	0	0
OTU_1210	0	0	0	0	0	0	0	0	0	0	0	0	0	0	0	0	0	0	0	0	0	0	0	0	0	0	0	0	0	0	0	0	0	0	0	0	0	0	0	0	0	0	0	0	0	0	0	0	0
OTU_1211	0	0	0	0.000127432	0	0	4.24773e-05	0	4.24773e-05	8.49545e-05	0	4.24773e-05	4.24773e-05	0	0	0	0	0	0	0	0	0	0	0.000212386	0	0	0	8.49545e-05	0	4.24773e-05	0	0	0	0	0	0	4.24773e-05	4.24773e-05	0	0	8.49545e-05	0	0	0	0	4.24773e-05	0	0	0.000382295
OTU_1212	0	0	0	0	0	0	0	0	0	0	0	0	0	0	0	0	0	0	0	0	0	0	0	0	0	0	0	0	0	0	0	0	0	0	0	0	0	0	0	0	0	0	0	0	0	0	0	0	0
OTU_1213	0	0	0	0	0	0	0	0	0	0	0	0	0	0	0	0	0	0	0	0	0	0	0	0	0	0	0	0	0	0	0	0	0	0	0	0	0	0	0	0	0	0	0	0	0	0	0	0	0
OTU_1214	0	0	0	0	0	0	0	0	0	0	0	0	0	0	0	0	0	0	0	0	0	0	0	0	0	0	0	0	0	0	0	0	0	0	0	0	0	0	0	0	0	0	8.49545e-05	0	8.49545e-05	4.24773e-05	0	0	0
OTU_1215	0	0	0	0	0	0	0	0	0	0	0	0	0	0	0	0	0	0	0	0	0	0	0	0	0	0	0	0	0	0	0	0	0	0	0	0	0	0	0	0	0	0	0	0	0	0	0	0	0
OTU_1218	0	0	0	0	0	0	0	0	0	0	0	0	0	0	0	0	0	0	0	0	0	0	0	0	0	0	0	0	0	0	0	0	0	0	0	0	0	0	0	0	0	0	0	0	0	0	0	0	0
OTU_1219	0	0	0	0	0	0	0	0	0	0	0	0	0	0	0	0	0	0	0	0	0	0	0	0	4.24773e-05	0	0	0	0	0	0	0	0	0	0	0	0	0	0	0	0	0	0	0	0	0	0	0	0
OTU_122	0	0	0	0	0	0	0	0	0	0	0	0	0	0	0	0.000254864	0	0	0	0	0	0	0	0	0	0	0	0	0	0	0	0	0	0	0	0	0	0	0	0	0	0	0	0	0	0	0	0	0
OTU_1220	0	0	0	0	0	0	0	0	0	0	0	0	0	0	0	0	0	0	0	0	0	0	0	0	0	0	0	0	0	0	0	0	0	0	0	0	0	0	0	0	0	0	0	0	0	0	0	0	0
OTU_1221	0	0	0	0	0	0	0	0	0	0	0	0	0	0	0	0	0	0	0	0	0	0	0	0	0	0	0	0	0	0	0	0	0	0	0	0	0	0	0	0	0	0	0	0	0	0	0	0	0
OTU_1222	0	0	0	0	0	0	0	0	0	0	0	0	0	0	0	0	0	0	0	0	0	0	0	0	0	0	0	0	0	0	0	0	0	0	0	0	0	0	0	0	0	0	0	0	4.24773e-05	0	0	0	0
OTU_1223	0	0	0	0	0	0	0	0	0	0	0	0	0	0	0	0	0	0	0	0	0	0	0	0	0	0	0	0	0	0	0	0	0	0	0	0	0	0	0	0	0	0	0	0	0	0	0	0	0
OTU_1226	0	0	0	0	0	0	0	0	0	0	0	0	0	0	0	0	0	0	0	0	0	0	0	0	0	0	0	0	0	0	0	0	0	0	0	0	0	0	0	0	0	0	0	0	0	0	0	0	0
OTU_1227	0	0	0	0	0	0	0	0	0	0	0	0	0	0	0	0	0	0	0	0	0	0	0	0	0	0	0	0	0	0	0	0	0	0	0	0	0	0	0	0	0	0	0	0	4.24773e-05	0	0	0	0
OTU_1228	0	0	0	0	0	0	0	0	0	0	0	0	0	0	0	0	0	0	0	0	0	0	0	0	0	0	0	0	0	0	0	0	0	0	0	0	0	0	0	0	0	0	0	4.24773e-05	0.000127432	0	0	0	0
OTU_1229	0	0	0	0	0	0	0	0	0	0	0	0	0	0	0	0	0	0	0	0	0	0	0	0	0	0	0	0	0	0	0	0	0	0	0	0	0	0	0	0	0	0	0	0	0	0	0	0	0
OTU_123	0	0	0	0	0	0	0	0	0	0	0	0	0	0	0	0.000339818	0	0	0	0	0	0	0	0	0	0	0	0	0	0	0	4.24773e-05	0	0	0	0	0	0	0	0	0	0	0	0	0	0	0	0	0
OTU_1230	0	0	0	0	0	0	0	0	0	0	0	0	0	0	0	0	0	0	0	0	0	0	0	0	0	0	0	0	0	0	0	0	0	0	0	0	0	0	0	0	0	0	0	0	0	0	0	0	0
OTU_1231	0	0	0	0	0	0	0	0	0	0	0	0	0	0	0	0.000764591	0.000127432	0.00046725	0.000594682	0.00046725	0.000679636	4.24773e-05	0	4.24773e-05	0.000169909	0	0.000127432	0	0	4.24773e-05	0	0.000169909	4.24773e-05	4.24773e-05	0	8.49545e-05	0.000297341	0	0.00046725	0	0.000127432	0.000169909	0	0	0	0	0	0	0
OTU_1232	0	0	0	0	0	0	0	0	0	4.24773e-05	0	0	0	0	0	0	0	0	0	0	0	4.24773e-05	0	0	0	0	0	0	0	0	4.24773e-05	0	0	0	0	0	0	0	0	0	0	0	0	0	0	0	0	0	0
OTU_1235	0	0	0	0	0	0	0	0	0	0	8.49545e-05	0	0	4.24773e-05	0	4.24773e-05	0	0	0	0.000127432	0	0	0	0	0	0	0	0	0	0	0	0	0	0	0	0	0	0	0	0	0	0	0	0	4.24773e-05	0	4.24773e-05	0	0
OTU_1236	0	0	0	0	0	0	0	0	0	0	0	0	0	0	0	0	0	0	0	0	0	0	0	0	0	0	0	0	0	0	0	0	0	0	0	0	0	0	0	0	0	0	0	0	0	0	0	0	0
OTU_1238	0	0	0	0	0	0	0	0	0	0	0	0	0	0	0	0	0	0	0	0	0	0	0	0	0.000169909	0	0	0	0	0	0	0	0	0	0	0	0	0	0	0	0	0	0.00955739	8.49545e-05	4.24773e-05	0	4.24773e-05	0	0
OTU_1239	0	0	0	0	0	0	0	0	0	0	0	0	0	0	0	0	0	0	0	0	0	0	0	0	0	0	0	0	0	0	0	0	0	0	0	0	0	0	0	0	0	0	0	0	0	0	0	0	0
OTU_124	0	0	0	0	0	0	0	0	0	0	0	0	0	0	0	0.000254864	0	0	0	0	0	0	0	0	0	0	0	0	0	0	4.24773e-05	0	0	0	0	0	0	0	0	0	0	0	0	0	0	0	0	0	0
OTU_1240	0	0	0	0	0	0	0	0	0	0	0	0	0	0	0	0	0	0	0	4.24773e-05	0	0	0	0	0	0	0	0	0	0	0	0	0	0	0	0	0	0	0	0	0	0	0	0	0	0	0	0	0
OTU_1241	0	0	0	0	0	0	0	0	0	0	0	0	0	0	0	0	0	0	0	0	0	0	0	0	0	0	0	0	0	0	0	0	0	0	0	0	0	0	0	0	0	0	0	0	0	0	0	0	0
OTU_1242	0	0	0.000254864	4.24773e-05	4.24773e-05	4.24773e-05	4.24773e-05	0	0	0	0	0	0	0	0	4.24773e-05	0.000127432	4.24773e-05	0.000127432	0.000127432	8.49545e-05	0	0	0	0.000127432	0	0	0.000127432	4.24773e-05	4.24773e-05	0	4.24773e-05	0	0	0	4.24773e-05	0.000169909	0	0	0	0	0	0.000127432	0.000254864	0	0.000254864	0.000169909	0.000212386	0
OTU_1243	0	0	0	0	0	0	0	0	0	0	0	0	0	0	0	0	0	0	0	0	0	0	0	0	0	0	0	0	0	0	0	0	0	0	0	0	0	0	0	0	0	0	0	0	0	0	0	0	0
OTU_1244	0	0	0	0	8.49545e-05	0	0	0	0	0	0	0	0	0	0	0	4.24773e-05	0	0	0	0	0	0	0	0	0	0	0	0	0	0	0	0	0	0	0	0	0	0	0	0	0	0	0	0	0	0	0	0
OTU_1245	0	0	0	0	0	0	0	0	0	0	0	0	4.24773e-05	0	0	0	0	0	0	0	0	0	0	0	0	0	0	0	0	0	0	0	0	0	0	0	0	0	0	0	0	0	8.49545e-05	0	8.49545e-05	0	0	0	0
OTU_1246	0	0	0	0	0	0	0	0	0	0	0	0	0	0	0	0	0	0	0	0	0	0	0	0	0	0	4.24773e-05	0	0	0	0	0	0	0	0	0	0	0	0	0	0	0	0	0	0	0	0	0	0
OTU_1247	0	0	0	0	0	0	0	0	0	0	0	0	0	0	0	0	0	0	0	0	0	0	0	0	0	0	0	0	0	0	0	0	0	0	0	0	0	0	0	0	0	0	0	0	0	0	0	0	0
OTU_1248	0	0	0	0	0	0	0	0	0	0	0	0	0	0	0	0	4.24773e-05	0	0	0	0	0	0	0	0	0	0	0	0	0	0	0	0.000254864	0	4.24773e-05	0	0	0	0	0	0	0	0	0	0	0	0	0	0
OTU_125	0	0	0	0	0	0	0	0	0	0	0	0	0	0	0	0	0	0	0	0	0	0	0	0	0	0	0	0	0	0	0	0	0	0	0	0	0	0	0	0	0	0	0	0	0	0	0	0	0
OTU_1251	0	0	0	4.24773e-05	0	0	4.24773e-05	0	0	0	0	0	0	4.24773e-05	0	0.000212386	8.49545e-05	4.24773e-05	0.000127432	0.000212386	4.24773e-05	0	0	0	0.000169909	4.24773e-05	0.000212386	0	4.24773e-05	0	0	0	4.24773e-05	0.000212386	0.000127432	8.49545e-05	0	0.000127432	0	0	4.24773e-05	4.24773e-05	0.000127432	0.000212386	0.000127432	0.00297341	0.001869	0.00378048	4.24773e-05
OTU_1252	0	0	0	0	0	0	0	0	0	0	0	0	0	0	0	0	0	0	0	0	0	0	0	0	0	0	0	0	0	0	0	0	0	0	0	0	0	0	0	0	0	0	4.24773e-05	0	0	4.24773e-05	0	0	0
OTU_1254	0	0	0	0	0	0	0	0	0	0	0	0	0	0	0	0	0	0	0	0	0	0	0	0	0	0	0	0	0	0	0	0	0	0	0	0	0	0	0	0	0	0	4.24773e-05	0	0	0	0	0	4.24773e-05
OTU_1255	0	0	0	0	0	0	0	0	0	0	0	0	0	0	0	0	0	0	0	0	0	0	0	0	0	0	0	0	0	0	0	0	0	0	0	0	0	0	0	0	0	0	0	0	0	0	0	0	0
OTU_1256	0	0	0	0	0	0	0	0	0	0	0	0	0	0	0	0	0	0	0	0	4.24773e-05	0	0	0	0	0	0.00152918	0	8.49545e-05	0	0	0	0	0	4.24773e-05	0	0	0	0	0	0	0	0	0	0	0	0	0	0
OTU_1257	0	0	0	0	0	0	0	0	0	0	0	0	0	0	0	0	0	0	0	0	0	0	0	0	0	0	0	0	0	0	0	0	0	0	0	0	0	0	0	0	0	0	0	0	0	0	0	0	0
OTU_1258	0	0	0	0	0	0	0	0	0	0	0	0	0	0	0	0	0	4.24773e-05	0	0	0	0	0	0	0	0	4.24773e-05	0	0	0	0	0	0	0	0	4.24773e-05	0	0	0	0	0	0	0	0	0	0	0	0	0
OTU_1259	0	0	0	4.24773e-05	0	0	4.24773e-05	4.24773e-05	0	0	0	0	0	0	0	0	0	0	0	0	0	0	0	0	0	0	0	0	0	0	0	0	0	0	0	0	0	0	0	0	0	0	0	0	0	0	0	0	0.000212386
OTU_126	0	0	0	0	0	0	0	0	0	0	0	0	0	0	0	0	0	0	0	0	0	0	0	0	0	0	0	0	0	0	0	0	0	0	0	0	0	0	0	0	0	0	0	0	0	0	0	0	0
OTU_1260	0	0	0	0	0	0	0	0	0	0	0	0	0	0	0	0	0	0	0	0	0	0	0	0	0	0	0	0	0	0	0	0	0	0	0	0	0	0	0	0	0	0	0	0	0	0	0	0	0
OTU_1261	0	0	0	0	0	0	0	0	0	0	0	0	0	4.24773e-05	4.24773e-05	0	0	0	0	0	0	0	0	0	0	0	0	0	0	0	0	0	0	0	0	0	0	0	0	0	0	0	0	4.24773e-05	0	0	0	0	0
OTU_1262	0	0	0	0	0	0	0	0	0	0	0	0	0	0	0	0	0	0	0	0	0	0	0	0	0	0	0	0	0	0	0	0	0	0	0	0	0	0	0	0	0	0	0	0	0	0	0	0	0
OTU_1263	0	0	0	0	0	0	0	0	0	0	0	0	0	0	0	0	0	0	0	0	0	0	0	0	0	0	0	0	0	0	0	0	0	0	0	0	0	0	0	0	0	0	0	0	0	0	0	0	0
OTU_1264	0	0	0	0	0	0	0	0	0	0	0	0	0	0	0	0	0	0	0	0	0	0	0	0	0	0	0	0	0	0	0	0	0	0	0	0	0	0	0	0	0	4.24773e-05	0	0	0	0	0	0	0
OTU_1265	0	0	0	0	0	0	0	0	0	0	0	0	0	0	0	0	0	0	0	0	0	0	0	0	0	0	0	0	0	0	0	0	0	0	0	0	0	0	0	0	0	0	0	0	0	0	0	0	0
OTU_1266	0	0	0	0	0	0	0	0	0	0	4.24773e-05	0	0	0	0	0	0	0	0	0	0	0	0	0	0	0	0	0	0	0	0	0	0	0	0	0	0	0	0	0	0	0	0	0	0	0	0	0	0
OTU_1267	0	0	0	0	8.49545e-05	0	0	0	0	0	0	0	0	0	0	0	0	0	0	0	0	0	0	0	0	0	0	0	0	0	0	0	0	0	0	0	0	0	0	0	0	0	0	0	0	0	0	0	0
OTU_1268	0	0	0	0	4.24773e-05	0	0	0	0	0	0	0	0	0	0	0	0	0	0	0	0	0	0	0	0	0	0	0	0	0	0	0	0	0	0	0	0	0	0	0	0	0	0	0	0	0	0	0	0
OTU_1269	0	0	0	0	0	0	0	0	0	0	0	0	0	0	0	0	0	0	0	0	0	0	0	0	0	0	0	0	0	0	0	0	0	0	0	0	0	0	0	0	0	0	0	0	0	0	0	0	0
OTU_127	0	0	0	0	0	0	0	0	0	0	0	0	0	0	0	0.000297341	0	0	0	0	0	0	0	0	0	0	0	0	0	0	0	0	0	0	0	0	0	0	0	0	0	0	0	0	0	0	0	0	0
OTU_1270	0	0	0	0	0	0	0	0	0	0	0	0	0	0	0	0	0	0	0	0	0	0	0	0	0	0	0	0	0	0	0	8.49545e-05	0	0	0	0	0	0	0	4.24773e-05	0	4.24773e-05	0	0	0	0	0	0	0
OTU_1272	0	0	0	0	0	0	0	0	0	0	0	0	0	0	0	0	0	0	0	0	0	0	0	0	0	0	0	0	0	0	0	0	0	0	0	0	0	0	0	0	0	0	0	0	0	0	0	0	0
OTU_1275	0	0	0	0	0	0	0	0	0	0	0	0	0	0	0	0	0	0	0	0	0	0	0	0	0	0	0	0	0	0	0	0	0	0	0	0	0	0	0	0	0	0	0	0	0	0	0	0	0
OTU_1276	0	0	0	0	0	0	0	0	0	0	0	0	4.24773e-05	0	0	0	0	0	0	0	0	0	0	0	0	0	0	0	0	0	0	0	0	0	0	0	0	0	0	0	0	0	0	0	0	0	0	0	4.24773e-05
OTU_1277	0	0	0	0	0	0	0	0	0	0	0	0	0	0	0	0	0	0	0	0	0	0	0	0	0	0	0	0	0	0	0	0	0	0	0	0	0	0	0	0	0	0	0	0	0	0	0	0	0
OTU_1278	0	0	0	0	0	0	0	0	0	0	0	0	0	0	0	0	0	0	0	0	0	0	0	0	0	0	0	0	0	0	0	0	0	0	0	0	0	0	0	0	0	0	0	0	0	0	0	0	0
OTU_1279	0	0	0	0	0	0	0	0	0	0	0	0	0	0	0	0	0	0	0	0	0	0	0	0	0	0	0	0	0	0	0	0	0	0	0	0	0	0	0	0	0	0	0	0	0	0	0	0	0
OTU_128	0	0	0	0	0	0	0	0	0	0	0	0	0	0	0	0.000297341	0	0	0	0	0	0	0	0	0	0	0	0	0	0	0	0	0	0	0	0	0	0	0	0	0	0	0	0	0	0	0	0	0
OTU_1280	0	0	4.24773e-05	0	0	0	0	0	0	0	0	0	0	0	0	4.24773e-05	0	0	0	0	0	0	0	0	0	0	0	0	0	0	0	0	0	0	0	8.49545e-05	0	0	0	0	0	0	0	0	0	0	4.24773e-05	0	0
OTU_1281	4.24773e-05	4.24773e-05	0	0	0	0.000254864	8.49545e-05	0	0	0	0	0	4.24773e-05	0	4.24773e-05	0.000976977	0.000382295	0.000679636	0.000127432	0	4.24773e-05	0	0	0	0	0	4.24773e-05	4.24773e-05	0	0.000127432	0.000254864	0.000169909	0.000552205	4.24773e-05	0.000212386	8.49545e-05	8.49545e-05	0	0	8.49545e-05	0	8.49545e-05	0	0	0	0	4.24773e-05	0	0
OTU_1282	0	4.24773e-05	0	0	0	0	0	0	0	4.24773e-05	0	0	0	4.24773e-05	0	0	0	0	0	4.24773e-05	0	0	0	0	0	0	0	0	0	0	0	0	0	0	0	0	0	0	0	0	0	0	0	0	0	0	0	0	0
OTU_1283	0	0	0	0	8.49545e-05	0	0	0	0	0	0	0	0	0	0	0	0	0	4.24773e-05	0	0	0	0	0	0	0	0	0	0	0	0	0	0	0	0	0	0	0	0	0	0	0	0	0	0	0.000552205	0	0	0
OTU_1284	0	0	0	4.24773e-05	0	4.24773e-05	0	4.24773e-05	4.24773e-05	0	0.000339818	0	0	0	0	0	0	0	0.00212386	0	0.000722114	0	0.000382295	4.24773e-05	0	0	0.000127432	0	0	4.24773e-05	0	0.000382295	0	4.24773e-05	0	0	0	0	0	0.000424773	0	0	0	0.000127432	0	0	0	0	4.24773e-05
OTU_1285	0	0	0	0	0	0	0	0	0	0	0	0	0	0	0	0	0	8.49545e-05	0	0	0	0	0	0	0	0	0	0	0	0	0	0	0	0	0	0	0	0	0	0	0	0	0	0	0	0	0	0	0
OTU_1286	0	0	0	0	0	0	0	0	0	0	0	0	0	0	0	0	0	0	0	0	0	0	0	0	0	0	0	0	0	0	0	0	0	0	0	0	0	0	0	0	0	0	0	0	0	0	0	0	8.49545e-05
OTU_1287	0	0	0	0	0	0	0	0	0	0	0	0	0	0	0	0	0	0	0	0	0	0	0	0	0	0	0	0	0	0	0	0	0	0	0	0	0	0	0	0	0	0	0	0	0	0	0	0	0
OTU_1288	0	0	0	0	0	0	0	0	0	0	0	0	0	0	0	0	0	0	0	0	0	0	0	0	0	0	0	0	0	0	0	0	0	0	0	0	0	0	0	0	0	0	4.24773e-05	0	0	0	0	0	0
OTU_1289	0	0	0	0	0	0	0	0	0	0	8.49545e-05	0	0	0	0	0	0	0	0	0	0	0	0.000127432	0	0	0	0	0	0	0	4.24773e-05	0.000297341	0	0	0	0	0	0	0	4.24773e-05	0	0	0	0	0	0	0	0	0
OTU_129	0	0	0	0	0	0	0	0	0	0	0	0	0	0	0	8.49545e-05	0	0	0	0	0	0	0	0	0	0	0	0	0	0	0	0	0	0	0	0	0	0	0	0	0	0	0	0	0	0	0	0	0
OTU_1290	0	0	0	0	0	0	0	0	0	0	0	0	0	0	0	0	0	0	0	0	0	0	0	0	0	0	0	0	0	0	0	0	0	0	0	0	0	0	0	0	0	0	0	0	0	0	0	0	0
OTU_1291	0	0	0	0	0	0	0	0	0	0	0	0	0	0	0	0	0	0	0	0	0	0	0	0	0	0	0	0	0	0	0	0	0	0	0	0	0	0	0	0	0	0	0	0	0	0	0	0	0
OTU_1292	0	0	0	0	0	0	0	0	0	0	0	0	0	0	0	0	0	0	0	0	0	0	0	0	0	0	0	0	0	0	0	0	0	0	0	0	0	0	0	0	0	0	0	0	0	0	0	0	0
OTU_1293	0	0	0	0	0	0	0	0	0	0	0	0	0	0	0	0	0	0	0	0	0	0	0	0	0	0	0	0	0	0	0	0	0	0	0	0	0	0	0	0	0	0	0	0	0	0	0	0	0
OTU_1294	0	0	0	0	0	0	0	0	0	4.24773e-05	0	0	0	0	0	0	0	0	0	0	0	0	0	0	0	0	0	0	0	0	0	0	0	0	0	0	0	0	0	0	0	0	0	0	0	0	0	0	0
OTU_1295	0	0	0	0	0	0	0	0	0	0	0	0	0	0	0	0	0	0	0	0	0	0	0	0	0	0	0	0	0	0	0	0	0	0	0	0	0	0	0	0	0	0	0	0	0	0	0	0	0
OTU_1296	0	0	0	0	0	0	0	0	0	0	0	0	0	0	0	0	0	0	0	0	0	0	0	0	0	0	0	0	0	0	0	0	0	0	0	0	0	0	0	0	0	0	0	0	0	0	0	0	0
OTU_1297	0	0	0	0	0	0	0	0	0	0	0	0	0	0	0	0	0	0	0	0	0	0	0	0	0	0	0	0	0	0	0	0	0	0	0	0	0	0	0	0	0	0	0	0	0	0	0	0	0
OTU_1298	0	0	0	0	0	0	0	0	0	0	0	0	0	0	0	0	0	0	0	0	0	0	0	0	0	0	0	0	0	0	0	0	0	0	0	0	0	0	0	0	0	0	0	0	0	0	0	0	0
OTU_1299	0	0	0	0	0	0	0	0	0	8.49545e-05	0	0	0	0	0	0	0	0	0	0	0	0	0	0	0	0	0	0	0	0	0.000127432	0	0	0	0	0	0	4.24773e-05	0	0	0	0	0	0	0	0	0	0	8.49545e-05
OTU_13	0.000297341	0.000424773	0.000509727	0.000297341	0	0.00123184	0.000679636	0.0104069	0.00169909	0.000679636	0.000297341	0.000297341	0.00046725	0.000169909	0.000679636	0.00552205	0.00233625	0.00327075	0.0246368	0.00233625	0.0182652	0.0125733	0.0155892	0.00913261	0.0319854	0.0239572	0.0257412	0.0184351	0.0332597	0.0140175	0.00942995	0.0131255	0.0217908	0.0306686	0.0454507	0.0169484	0.0341093	0.0333447	0.0127857	0.00441764	0.00705123	0.00518223	0.000212386	4.24773e-05	0	0.00135927	0.000849545	0.000424773	0.000297341
OTU_130	0	0	0	0	0	0	0	0	0	0	0	0	0	0	0	0.000212386	0	4.24773e-05	0	0	0	0	0	0	0	0	0	0	0	0	0	4.24773e-05	0	0	0	0	0	0	0	0	0	0	0	0	0	0	0	0	0
OTU_1300	0	0	0	0	0	0	0	0	0	0	0	0	0	0	0	0	0	0	0	0	0	0	0	0	0	0	0	0	0	0	0	0	0	0	0	0	0	0	0	0	0	0	0	0	0	0	0	0	0
OTU_1301	0	0	0	0	0	0	0	0	0	0	0	0	0	0	0	0	0	0	0	0	0	0	0	0	0	0	0	0	0	0	0	0	0	0	0	0	0	0	0	0	0	0	0	0	0	0	0	0	0
OTU_1302	0	0	0	0	0	0	0	0	0	0	0	0	0	0	0	0	0	0	0	0	0	0	0	0	0	0	0	0	0	0	0	0	0	0	0	0	0	0	0	0	0	0	0	0	0	0	0	0	0
OTU_1303	0	0	0	0	0	0	0	0	0	0	0	0	0	0	0	0	0	0	0	0	0	0	0	0	0	0	0	0	0	0	0	0	0	0	0	0	0	0	0	0	0	0	0	0	0	0	0	0	0
OTU_1304	0	0	0	0	0.000127432	0	4.24773e-05	0	0	0	0	0	0	0	0	0	0	0	0	0	0	0	0	0	0	0	0	0	0	0	0	0	0	0	0	0	0	0	4.24773e-05	0	0	0	0	0	0	0	0	0	0
OTU_1305	0	0	0	0	0	0	0	4.24773e-05	0	4.24773e-05	0	0	0	0	0	0	0	0	0	0	0	0.000212386	0	0	0	0	0	0	0	0	0.000254864	0	0	0	0	0	0	0	0	0	0	0	0	0	0	0	0	0	4.24773e-05
OTU_1306	0	0	0	0	0	0	0	0	0	0	0	0	0	0	0	0	0	0	0	0	0	0	0	0	0	0	0	0	0	0	0	0	0	0	0	0	0	0	0	0	0	0	0	0	0	0	0	0	0
OTU_1307	0	0	0	0	0	0	0	0	0	0	0	0	0	0	0	0	0	0	0	8.49545e-05	0	0	0	0	0	0	0	0	0	0	0	0	0	0	0	0	0	0	0	0	0	0	0	0	0	0	0	0	0
OTU_1308	0	0	0	0	0	0	0	0	0	0	0	0	0	0	0	0	0	0	0	0	0	0	0	0	0	0	0	0	0	0	0	0	0	0	0	0	0	0	0	0	0	0	0	0	0	0	0	0	0
OTU_1309	0	0	0	0	0	0	0	0	0	0	0	0	0	0	8.49545e-05	0	0	0	0	0	0	0	0	0	0	0	0	0	0	0	0	0	0	0	0	0	0	0	0	0	0	0	0	0	0	0	0	0	0
OTU_131	0	0	0	0	0	0	0	0	0	0	0	0	0	0	0	0	0	0	0	0	0	0	0	0	0	0	0	0	0	0	0	0	0	0	0	0	0	0	0	0	0	0	0	0	0	0	0	0	0
OTU_1310	0	0	0	0	0	0	0	0	0	0	0	0	0	0	0	0	0	0	0	0	0	0	0	0	0	0	0	0	4.24773e-05	0	0	0	0	0	0	0	0	0	0	0	0	0	0	0	0	0	0	0	0
OTU_1311	0	0	0	0	0	0	0	0	0	0	0	0	0	0	0	0	0	0	0	0	0	0	0	0	0	0	0	0	0	0	0	0	0	0	0	0	0	0	0	0	0	0	0	0	0	0	0	0	0
OTU_1312	0	0	0	0	0	0	0	0	0	0	0	0	0	0	0	0	0	4.24773e-05	0	0	0	0	0	0	0	0	0	0	0	0	0	0	0	0	0	0	0	0	0	0	0	0	0	4.24773e-05	0	0	0	0	0
OTU_1313	0	0	0	0	0	0	0	0	0	0	0	0	0	0	0	0	0	0	0	0	0	0	0	0	0	0	0	0	0	0	0	0	0	0	0	0	0	0	0	0	0	0	0	0	0	0	0	0	0
OTU_1314	0	0	0	0	0	0	0	0	0	0	0	0	0	0	0	0	0	0	0	0	0	0	0	0	0	0	0	0	0	0	0	0	0	0	0	0	0	0	0	0	0	0	0	0	0	0	0	0	0
OTU_1315	0	0	0	0	0	0	0	0	0	0	0	0	0	0	0	4.24773e-05	0	0	0	0	0	0	0	0	0	0	0	4.24773e-05	0	0	0	4.24773e-05	0.000127432	0	0	0	0	0	0	0	0	4.24773e-05	0	0	0	0	0	0	0
OTU_1316	0	0	0	0	0	0	0	0	0	0	0	0	0	0	0	0	0	0	0	0	0	0	0	0	0	0	0	0	0	0	0	0	0	0	0	0	0	0	0	0	0	0	0	0	0	0	0	0	0
OTU_1317	0	0	0	0	0.000127432	0	0	0	0	0	0	0	0	0	0	0	0	0	0	0	0	0	0	0	0	0	0	0	0	0	0	0	0	0	0	0	0	0	0	0	0	0	0	0	0	0	0	0	0
OTU_1318	0	0	0	0	0	0	0	0	0	0	0	0	0	0	0	0	0	0	0	0	0	0	0	0	0	0	0	0	0	0	0	0	0	0	0	0	0	0	0	0	0	0	0	0	0	0	0	0	0
OTU_1319	0	0	0	0	0	0	0	0	0	0	0	0	0	0	0	0	0	0	0	0	0	0	0	0	0	0	0	0	0	0	0	0	0	0	0	0	0	0	0	0	0	0	0	0	0	0	0	0	0
OTU_132	0	0	0	0	0	0	0	0	0	0	0	0	0	0	0	0	0	0	0	0	0	0	0	0	0	0	0	0	0	0	0	0	0	0	0	0	0	0	0	0	0	0	0	0	0	0	0	0	0
OTU_1320	0	0	0	0	0	0	0	0	0	0	0	0	0	0	0	0	0	0	0	0	0	0	0	0	0	0	0	0	0	0	0	0	0	0	0	0	0	0	0	0	0	0	0	0	0	0	0	0	0
OTU_1321	0	0	0	0	0	0	0	0	0	0	0	0	0	0	0	0	0	0	0	0	0	0	0	0	0	0	0	0	0	0	0	0	0	0	0	0	0	0	0	0	0	0	0	0	0	0	0	0	0
OTU_1322	0	0	0	0	0	0	0	0	0	0	0	0	0	0	0	0	0	0	0	0	0	0	0	0	0	0	0	0	0	0	0	0	0	0	0	0	0	0	0	0	0	0	0	0	0	0	0	0	0
OTU_1323	0	0	0	0	0	0	0	0	0	0	0	0	0	0	0	0	0	0	0	0	0	0	0	0	0	0	0	0	0	0	0	0	0	0	0	0	0	0	0	0	0	0	0	0	0	0	0	0	0
OTU_1324	0	0	8.49545e-05	0	0	4.24773e-05	8.49545e-05	0	4.24773e-05	0	0	0	0	0	0.000127432	0	0	0	0	0	0	0	0	0	0	8.49545e-05	0	0	0	0	0	4.24773e-05	0	8.49545e-05	0	0	0	0	0	0	0	4.24773e-05	0	4.24773e-05	0.000212386	4.24773e-05	0	0	0
OTU_1325	0	0	0	0	0	0	4.24773e-05	0	0	0	0	0	0	0	0	0	0	0	0	0	0	0	0	0	0	4.24773e-05	0	0	0	0	0	0	0	0	0	0	0	0	0	0	0	0	0	0	0	0	0	0	0
OTU_1326	0	0	0	0	0	0	0	0	0	0	0	0	0	0	0	0	0	0	0	0	0	0	0	0	0	0	0	0	0	0	0	0	0	0	0	0	0	0	0	0	0	0	0	0	0	0	0	0	0
OTU_1327	0	0	0	0	0	0	0	0	0	0	0	0	0	0	0	0	0	0	0	0	0	0	0	0	0	0	0	0	0	0	0	0	0	0	0	0	0	0	0	0	0	0	0	0	0	0	0	0	0
OTU_1328	0	0	0	0	0	0	0	0	0	0	0	0	0	0	0	0	0	0	0	0	0	0	0	0	0	0	0	0	0	0	0	0	0	0	0	0	0	0	0	0	0	0	0	0	0	0	0	0	0
OTU_1329	0	0	0	0	0	0	0	0	0	4.24773e-05	0	0	0	0	0	0	4.24773e-05	0	0	0	0	0	0	0	0	0	0	0	0	0	0	0	0	0	0	0	0	0	0	0	0	0	0	0	0	0	0	0	0.000169909
OTU_133	0	0	0	0	0	0	0	0	0	0	0	0	0	0	0	0.000169909	4.24773e-05	4.24773e-05	0	0	0	0	0	0	0	0	0	0	0	0	0	0	0	0	0	0	0	0	0	0	0	0	0	0	0	0	0	0	0
OTU_1330	0	0	0	0	0	0	0	0	0	0	0	0	0	0	0	0	0	0	0.00301589	0.000382295	0.00314332	0	0	0	4.24773e-05	0	0	0	0	0	0	0	4.24773e-05	0	0	0	0	0	0	0	0	0	0	0	0	4.24773e-05	0	0	0
OTU_1331	8.49545e-05	0	0.000807068	0.003738	4.24773e-05	8.49545e-05	0.000382295	0.000807068	0.0009345	0.000892023	0.000382295	0.000127432	0.000382295	0	0.000212386	8.49545e-05	0	0	0	0	0	0.000552205	0.000807068	0.000424773	0	0.00046725	0	0.000382295	0	4.24773e-05	0.00101945	0.000722114	8.49545e-05	0.000212386	0	0	0.000169909	0.000976977	0.000382295	0.000764591	0.000339818	0	0	0	0	0	0	0	0.00106193
OTU_1332	0	0	0	0	0	0	0	0	0	0	0	0	0	0	0	0	0	0	0	0	0	0	0	0	0	0	0	0	0	0	0	0	0	0	0	0	0	0	0	0	0	0	0	0	0	0	0	0	0
OTU_1333	0	0	0	0	0	0	0	0	0	0	0	0	0	0	0	0	0	0	0	0	0	0	0	0	0	0	0	0	0	0	0	0	0	0	0	4.24773e-05	0	0	0	0	0	0	0	0	0	0	0	0	0.000169909
OTU_1334	0	0	0	0	0	0	0	0	0	0	0	0	0	0	0	0	0	0	0	0	0	0	0	0	0	0	0	0	0	0	0	0	0	0	0	0	0	0	0	0	0	0	0	0	0	0.000169909	0	0.000254864	0
OTU_1335	0	0	0	0	0	0	0	0	0	0	0	0	0	0	0	0	0	0	0	0	0	0	0	0	0	0	0	0	0	0	0	0	0	0	0	0	0	0	0	0	0	0	0	0	0	0	0	0	0
OTU_1336	0	4.24773e-05	0	0	0	4.24773e-05	0	0	0	4.24773e-05	0	8.49545e-05	0.000127432	4.24773e-05	0	0.00046725	0	0	0.0136352	0.001869	0.00437516	0.000127432	8.49545e-05	8.49545e-05	8.49545e-05	4.24773e-05	0.000297341	0.00734857	0.00331323	0.00331323	0.000382295	0.00118936	0.000594682	0.000169909	0.000764591	0.000169909	8.49545e-05	0	8.49545e-05	0	0.000127432	0.000297341	0	0	0	0.000297341	4.24773e-05	4.24773e-05	0
OTU_1337	0	0	0	0	0	0	0	0	0	0	0	0	0	0	0	0	0	0	0	0	0	0	0	0	0	0	0	0	0	0	0	0	0	0	0	0	0	0	0	0	0	0	0	0	0	0	0	0	0
OTU_1338	0	0	0	0	0	0	0	0	0	0	0	0	0	0	0	0	0	0	0	0	0	0	0	0	0	0	0	0	0	0	0	0	0	0	0	0	0	0	0	0	0	0	0	0	0	0	0	0	0
OTU_1339	0	0	0	0	0	0	0	0	0	0	0	0	0	0	0	0	0	0	0	0	0	0	0	0	0	0	0	0	0	0	0	0	0	0	0	0	0	0	0	0	0	0	0	0	0.000169909	0.000127432	0	0	0
OTU_134	0	0	0	0	0	4.24773e-05	0	0	0	0	0	0	0	0	0	0.000254864	0	4.24773e-05	0	0	0	0	0	0	0	0	0	0	0	0	0	0	0	4.24773e-05	0	0	0	0	0	0	0	0	0	0	0	0	0	0	0
OTU_1340	0	0	0	0	0	0	0	0	0	0.000254864	0	0	0	0	0	0	0	0	0	0	0	0	0	0	0	0	0	0	0	0	0	0	0	0	0	0	0	0	0	0	0	0	0	0	0	0	0	0	0
OTU_1341	0	0	0	0	0	0	0	0	0	0	0	0	0	0	0	0	0	0	0	0	0	0	0	0	0	0	0	0	0	0	0	0	0	0	0	0	0	0	0	0	0	0	0	0	0	0	0	0	0
OTU_1342	0	0	0	0	0	0	0	0	0	0	0	0	0	0	0	0	0	0	0	0	0	0	0	0	0	0	0	0	0	0	0	0	0	0	0	0	0	0	0	0	0	0	0	0	0	0	0	0	0
OTU_1343	0	0	0	0	0	0	0	0	0	0	0	0	0	0	0	0	0	0	0	0	0	0	0	0	0	0	0	0	0	0	0	0	0	0	0	0	0	0	0	0	0	0	0	0	0	0	0	0	0
OTU_1344	0	0	0	0	0	0	0	0	0	0	0	0	0	0	0	0	0	0	0	0	0	0	0	0	0	0	0	0	0	0	0	0	0	0	0	0	0	0	0	0	0	0	0	0	0	0	0	0	0
OTU_1346	0	0	0	0	0	0	0	0	0	0	0	0	0	0	0	0	0	0	0	0	0	0	0	0	0	0	0	0	0	0	0	0	0	0	0	0	0	0	0	0	0	0	0	0	0	0	0	0	0
OTU_1347	0	0	0	0	0	0	0	0	0	0	0	0	0	0	0	0	0	0	0	0	0	0	0	0	0	0	0	0	0	0	0	0	0	0	0	0	0	0	0	0	0	0	0	0	0	0	0	0	0
OTU_1348	0	0	0	0	0	0	0	0	0	0	0	0	0	0	0	0	0	0	0	0	0	0	0	0	0	0	0	0	0	0	0	0	0	0	0	0	0	0	0	0	0	0	0	0	0	4.24773e-05	0	4.24773e-05	0
OTU_1349	0	0	4.24773e-05	0.000254864	8.49545e-05	0	0	0	0	0	0	0	0	0	4.24773e-05	0	0	4.24773e-05	0.000339818	0.000254864	0.00127432	0	0	0	8.49545e-05	0	4.24773e-05	0	8.49545e-05	0.000212386	0	0	4.24773e-05	4.24773e-05	0	8.49545e-05	0	0	0	4.24773e-05	0	0	0	0	0	4.24773e-05	0	8.49545e-05	0
OTU_135	0	0	0	0	0	0	0	0	0	0	0	0	0	0	0	0	0	0	0	0	4.24773e-05	0	0	0	0	0	0	0	0	0	0	0	0	0	0	0	0	0	0	0	0	0	0	0	0	0	0	0	0
OTU_1350	0	0	0	0	0	0	0	0	0	4.24773e-05	0	0	4.24773e-05	0	0	0	0	8.49545e-05	0	0	0	0	0	0	0	0	0	4.24773e-05	0	0	0	0	0	0	0	0	0	0	0	4.24773e-05	0	0	0	0	0	0	0	4.24773e-05	0.000807068
OTU_1351	0	0	0	0	0	0	0	0	0	0	0	0	0	0	0	0	0	0	0	0	0	0	0	0	0	0	0	0	0	0	0	0	0	0	0	0	0	0	0	0	0	0	0	0	0	0	0	0	0
OTU_1352	0	0	0	0	0	0	0	0	0	0	4.24773e-05	0	0	0	0	0	0	0	0	0	0	0	0	0	0	0	0	0	0	0	0	0	0	0	0	0	0	0	0	0	0	0	0	0	0	0	0	0	0
OTU_1353	0	0	0	0	0	0	0	0	0	0	4.24773e-05	0	0	4.24773e-05	0	0.00254864	0.00271855	0.00259111	0.000254864	0.000212386	4.24773e-05	0	8.49545e-05	0	0	0	4.24773e-05	0	0	8.49545e-05	0.000254864	0.000212386	0.00140175	0.000127432	0.000254864	4.24773e-05	8.49545e-05	4.24773e-05	0	0	0.000169909	0.000169909	0	0	0	0	0	0	0
OTU_1355	0	0	0	0	0	0	0	0	0	0	0	0	0	0	0	0	0	0	0	0	0	0	0	0	0	0	0	0	0	0	0	0	0	0	0	0	0	0	0	0	0	0	0	0	0	0	0	0	0
OTU_1357	0	0	0	0	0	0	0	0	0	0	0	0	0	0	0	0	0	0	0	0	0	0	0	0	0	0	0	0	0	0	0	0	0	0	0	0	0	0	0	0	0	0	0	0	0	0	4.24773e-05	0	4.24773e-05
OTU_1358	0	0	0	0	0	0	0	0	0	0	0	0	0	0	0	0	0	0	0	0	0	0	0	0	0	0	0	0	0	0	0	0	0	0	0	0	0	0	0	0	0	0	0	0	0	0	0	0	0
OTU_136	0	0	0	0	0	0	0	0	0	0	0	0	0	0	0	0	0	0	0	0	0	0	0	0	0	0	0	0	0	0	0	0	0	0	0	0	0	0	0	0	0	0	0	0	0	0	0	0	0
OTU_1360	0	0	0	0	0	0	0	0	0	0	0	0	0	0	0	0	0	0	0	0	0	0	0	0	0	0	0	0	0	0	0	0	0	0	0	0	0	0	0	0	0	0	0	0	0	0	0	0	0
OTU_1361	0	0	0	0	0	0	0	0	0	0	0	0	0	0	0	0	0	0	0	0	0	0	0	0	0	0	0	0	0	0	0	0	0	0	0	0	0	0	0	0	0	0	0	0	0	0	0	0	0
OTU_1362	0	0	0	0	0	0	0	0	0	0	0	0	0	0	0	0	0	0	0	4.24773e-05	0	0	0	0	0	0	0	0	0	0	0	0	0	0	0	4.24773e-05	0	0	0	0	0	0	0	0	0	0	0	0	0
OTU_1363	0	0	0	0	0	0	0	0	0	0	0	0	0	0	0	0	0	0	0	0	0	0	0	0	0	0	0	0	0	0	0	0	0	0	0	0	0	0	0	0	0	0	0	0	0	0	0	0	0
OTU_1364	0	0	0	0	0	0	0	0	0	0	0	0	0	0	0	0	0	0	0	0	0	0	0.000169909	0	0	0	0	0	0	0	0	0	0	0	0	0	0	0	0	0	0	0	0	0	0	0	0	0	0
OTU_1365	0	0	0	0	0	0	0	0	0	0	0	0	0	0	0	0	0	0	0	0	0	0	0	0	0	0	0	0	0	0	0	0	0	0	0	0	0	0	0	0	0	0	0	0	0	0	0	0	0
OTU_1366	0	0	0	0	0	0	0	4.24773e-05	0	0	0	0	4.24773e-05	0	0	0.000127432	0	0	0	0	0	0	0	4.24773e-05	0	0	0	0	0	0	0	0	4.24773e-05	0	0	0	0	0	4.24773e-05	4.24773e-05	0	4.24773e-05	0	0	0	0	0	0	0
OTU_1367	0	0	0	0	0	0	0	0	0	0	0	0	0	0	0	0	0	0	0	0	0	0	0	0	0	0	0	0	0	0	0	0	0	0	0	0	0	0	0	0	0	0	0	0	0	0	0	0	0
OTU_1368	0	0	0	0	0	0	0	0	0	0	0	0	0	0	0	0	0	0	0	0	0	0	0	0	0	0	0	0	0	0	0	0	0	0	0	4.24773e-05	0	0	0	0	0	0	0	0	4.24773e-05	4.24773e-05	0	0	0
OTU_1369	0	0	0	0	0	0	0	0	0	0	0	0	0	0	0	0	0	0	0	0	0	0	0	0	0	0	0	0	0	0	0	0	0	0	0	0	0	0	0	0	0	0	0	0	0	0	0	0	0
OTU_137	0	0	0	0	0	0	0	0	0	0	0	0	0	0	0	0	0	0	0	0	0	0	0	0	0	0	0	0	0	0	0	0	0	0	0	0	0	0	0	0	0	0	0	0	0	0	0	0	0
OTU_1370	0	0	0	0	0	0	0	0	0	0	0	0	0	0	0	0	4.24773e-05	0	0	0	0	0	0	0	0	0	0	0	0	4.24773e-05	0	0	0	0	0	0	0	0	0	0	0	0	0	0	0	0	0	0	0
OTU_1371	0	0	0	0	0	0	0	0	0	0	0	0	0	0	0	0	0	0	0	0	0	0	0	0	0	0	0	0	0	0	0	0	0	0	0	0	0	0	0	0	0	0	0	0	0	0	0	0	0
OTU_1372	0	0	0	8.49545e-05	0	0	0	0	0	4.24773e-05	0	0	0	0	0	0	0	0	0	0	8.49545e-05	0	0	0	0	0	0	0	0	0	0	0	4.24773e-05	0	0	0	0	4.24773e-05	0	0	0	0	0	0	0	0	0	0	0
OTU_1373	0	0	0	0	0	0	0	0	0	0	0	0	0	0	0	0	0	0	0	0	0	4.24773e-05	0	0	0	0	0	0	0	0	0	0	0	0	0	0	0	4.24773e-05	0	0	0	0	0	0	0	0	0	0	0
OTU_1374	0	0	0	0	0	0	0	0	0	0	0	0	0	0	0	0	0	0	0	0	0	0	0	0	0	0	0	0	0	0	0	0	0	0	0	0	0	0	0	0	0	0	0	0	0	0	0	0	0
OTU_1375	0	0	0	4.24773e-05	0	0	0	0	4.24773e-05	4.24773e-05	0	0	0	0	0	0	0	0	0	0	0	0	0	0	0	0	0	0	0	0	0	0	0	0	0	0	0	0	0	0	0	0	0	0	0	0	0	0	0
OTU_1376	0	0	0	0	0	0	0	0	0	0	0	0	0	0	0	0	0	0	0	0	0	0	0	0	0	0	0	0	0	0	0	0	0	0	0	0	0	0	0	0	0	0	0	0	8.49545e-05	0	0	0	0
OTU_1377	0	0	0	0	0	4.24773e-05	0	0	0	0	0	0	0	0	0	0	0	0	0	0	0	0	4.24773e-05	0	0	0	0	8.49545e-05	0	0	0	0	0	0	0	0	0	0	0	0	0	0	0	0	0	0	8.49545e-05	0.000127432	0
OTU_1378	0	0	0	0	0	0	0	0	0	0	0	0	0	0	0	0	0	0	0	0	0	0	0	0	0	0	0	0	0	0	0	0	0	0	0	0	0	0	0	0	0	0	0	0	0	0	0	0	0
OTU_1379	0	0	0	0	0	0	0	0	0	0	0	0	0	0	0	0	0	0	0	0	0	0	0	0	0	0	0	0	0	0	0	0	0	0	0	0	0	0	0	0	0	0	0	0	0	0	0	0	0
OTU_138	0	0	0	0	0	0	0	0	0	0	0	0	0	0	0	8.49545e-05	0	4.24773e-05	0	0	0	0	0	0	0	0	0	0	0	0	4.24773e-05	0	0	0	0	0	0	0	0	0	0	0	0	0	0	0	0	0	0
OTU_1380	8.49545e-05	0.0022513	0.00114689	0.000679636	0.000127432	0.000127432	0.121952	4.24773e-05	0.000169909	0.00157166	0.00284598	0.00203891	8.49545e-05	4.24773e-05	0.00106193	0.00165661	0.000297341	0.000637159	0.012106	0.00717866	0.0122335	0.000127432	4.24773e-05	0.000254864	0.000764591	0.00220882	0.00293093	0.00297341	0.00509727	0.0014867	0.000382295	0.000339818	0.000212386	0.00106193	0.00123184	0.00174157	0.00157166	0.00106193	0.00114689	0.000127432	0.000169909	0.000254864	0.00395039	0.00479993	0.00212386	0.0132104	0.0228528	0.0172883	8.49545e-05
OTU_1382	0	0	0	0	0	0	4.24773e-05	0	4.24773e-05	8.49545e-05	0.000637159	0.00212386	0	0	0	0	0	0	0	0	0	0	0	8.49545e-05	0	0	0	0	0	0	0	0	0	0	0	0	0	0	0	0	4.24773e-05	0	0	0	0	0	0	0	0
OTU_1383	0	0	0	0	0	0	0	0	0	0	0	0	0	0	0	0	0	0	0	0	0	0	0	0	0	0	0	0	0	0	0	0	0	0	0	0	0	0	0	0	0	0	0	0	0	0	0	0	0
OTU_1384	0	0	0	4.24773e-05	0	0	0	0	0	4.24773e-05	0	8.49545e-05	0	4.24773e-05	0	0	4.24773e-05	0	0.00496984	0.00726361	0.00267607	0	0	0	0	4.24773e-05	8.49545e-05	0	0.000212386	0	0	8.49545e-05	4.24773e-05	0	4.24773e-05	4.24773e-05	0	0	0	0	0	0	0	8.49545e-05	0.000339818	0.000849545	0.000297341	0.00110441	0
OTU_1385	0	0	0	0	0	0	0	0	0	0	0	0	0	0	0	0	0	0	0	0	0	0	0	0	0	0	0	0	0	0	0	0	0	0	0	0	0	0	0	0	0	0	0	0	0	0	0	0	0
OTU_1387	0	0	0	0	0	0	0	0	0	0	0	0	0	0	0	0	0	0	0	0	0	0	0	0	0	0	0	0	0	0	0	0	0	0	0	0	0	0	0	0	0	0	0	8.49545e-05	0	0	0	0	0
OTU_1388	0	0	0	0	0	0	0	4.24773e-05	0	0	0	0	0	0	0	0	0	0	0	0	0	0	0	0	0	0	0	0	0	0	0	0	0	0	0	0	0	4.24773e-05	0	0	0	0	0	0	0	0	0	0	0
OTU_1389	0	0	0	0	0	0	0	0	0	0	0	0	0	0	0	0	0	0	0	0	0	0	0	0	0	0	0	0	0	0	0	0	4.24773e-05	0	0	0	0	0	0	0	0	0	0	0	0	0	0	0	0
OTU_139	0	0	0	0	0	0	0	0	0	0	0	0	0	0	0	0	0	0	0	0	0	0	0	0	0	0	0	0	0	0	0	0	0	0	0	0	0	0	0	0	0	0	0	0	0	0	0	0	0
OTU_1390	0	0	0	0	0	0	0	0	0	0	0	0	0	0	0	0	0	0	0	0	0	0	0	0	0	0	0	0	0	0	0	0	0	0	0	0	0	0	0	0	0	0	0	0	0	0	0	0	0
OTU_1391	0	0	0	0	0	0	0	0	0	0	0	0	0	0	0	0	0	0	0	0	0	0	0	0	0	0	0	0	0	0	0	0	0	0	0	0	0	0	0	0	0	0	0	0	0	0	0	0	0
OTU_1392	0	0	0	0	0	0	0	0	0	0	0	0	0	0	0	0	0	0	0	0	0	0	0	0	8.49545e-05	0	0	0	0	0	0	0	0	0	0	0	0	0	0	0	0	0	0.00777334	0.00233625	0	0.000169909	8.49545e-05	8.49545e-05	0
OTU_1393	0.0234899	0.14935	0.0658398	0.00955739	0.802056	0.0663495	0.325291	0.0201767	0.0323252	0.0161838	0.0454932	0.0176705	0.034619	0.0422649	0.0448985	0.153853	0.0995667	0.116897	0.0434967	0.0187325	0.0165661	0.0028035	0.0107043	0.00305836	0.000807068	0.00424773	0.00195395	0.0141874	0.00628664	0.0305836	0.590604	0.566689	0.682865	0.0162263	0.0128706	0.00365305	0.0207289	0.0144423	0.015037	0.218461	0.33094	0.36042	0.000127432	0.000169909	0	0.0160564	0.00836802	0.00858041	0.00293093
OTU_1394	0	0	0	0	0	0	0	0	0	0	0	0	0	0	0	0	0	0	0	0	0	0	0	0	0	0	0	0	0	0	0	0	0	0	4.24773e-05	0	0	0	0	0	0	0	0.000127432	8.49545e-05	0.000212386	0.000212386	0.000127432	8.49545e-05	0
OTU_1395	4.24773e-05	0	0	0	0	0	0	0	0	0	0	0	0	0	0	0	0	0	0	0	0	0	0	0	0	0	0	0	0	0	0	0	0	0	0	0	0	0	0	0	0	0	4.24773e-05	0.000212386	0.000382295	0	0	0	0
OTU_1396	0.000339818	0	0.00263359	0.00114689	0.000339818	0.00212386	0	0	0	0	0	0	0	0	8.49545e-05	0.000679636	0	0	0	0	0	0	4.24773e-05	0	0	0	0	0	0	0.000679636	0	4.24773e-05	0	0	0	0	0.000807068	0	0	0	4.24773e-05	0	0	0	0	0	0	0	0
OTU_1397	0	0	0	0	0	0	0	0	0	0	0	0	0	0	0	8.49545e-05	0.000127432	0	0.00110441	0.000127432	0.000382295	0	0	4.24773e-05	0	0	4.24773e-05	0.000509727	0.000254864	0.000127432	0	0	8.49545e-05	8.49545e-05	8.49545e-05	0.000169909	0	0	0	0	4.24773e-05	4.24773e-05	0	0	0	0	0	4.24773e-05	0
OTU_1398	0	0	0	0	0	0	0	0	0	0	0	0	0	0	0	0	0	0	0	0	0	0	0	0	0	0	0	0	0	0	0	0	0	0	0	0	0	0	0	0	0	0	0	0	0	0	0	0	0
OTU_1399	0	0	0	0	0	0	0	0	0	0	0	0	0	0	0	0	0	0	0	0	0	0	0	0	0	0	0	0	0	0	0	0	0	0	0	0	0	0	0	0	0	0	0	0	0	0	0	0	0
OTU_14	0	0	0	0	0	0	0	0	0	0	0	0	0	0	0	0	0	0	0	0	0	0	0	0	0	0	0	0	0	0	0	0	0	0	0	0	0	0	0	0	0	0	0	0	0	0	0	0	0
OTU_140	0	0	0	0	0	0	0	0	0	0	0	0	0	0	0	8.49545e-05	0	0	0	0	0	0	0	0	0	0	0	0	0	0	0	0	0	0	0	0	0	0	0	0	0	0	0	0	0	0	0	0	0
OTU_1400	0	0	0	0	0	0	0	0	0	0	0	0	0	0	0	0	0	0	0	0	0	0	0	0	0	0	0	0	0	0	0	0	0	0	0	0	0	0	0	0	0	0	0	0	0	0	0	0	0
OTU_1401	0	4.24773e-05	0.000212386	0.000212386	0.000212386	0.000254864	0.000339818	0	8.49545e-05	0	0	0.000127432	0.000127432	0	0.000127432	0.000382295	0.000169909	0.000212386	0.020474	0.010322	0.0316456	0.000254864	0.000254864	0.000127432	0.000382295	0.000212386	0.0013168	0.0154193	0.00951491	0.00807068	0.0009345	0.00140175	0.00101945	0.000764591	0.000892023	0.00118936	0.000212386	0.000339818	0.000424773	8.49545e-05	0.000212386	8.49545e-05	0	0	4.24773e-05	0.000976977	0.000849545	0.00101945	0
OTU_1402	0	0	0	0	0	0	0	0	0	0	8.49545e-05	0	0	0	0	0	0	0	0	0	0	0	0	0	0	0	0	0	0	0	0	0.000127432	0	0	0	0	0	0	0	8.49545e-05	0	0	0	0	0	0	0	0	0
OTU_1403	0	0	0	0	0	0	0	0	0	0	0	0	0	0	0	4.24773e-05	4.24773e-05	4.24773e-05	0	0	0	0	0	0	0	0	0	0	0	0	4.24773e-05	0	0.000127432	0	0	0	0	0	0	0	0	0	0	0	0	0	0	0	0
OTU_1404	0	0	0	0	0	0	0	0	0	0	0	0	0	0	0	0	0	0	0	0	0	0	0	0	0	0	0	0	0	0	0	0	0	0	0	0	0	0	0	0	0	0	0	0	0	0	0	0	0
OTU_1405	0	0	0	0	0	0	0	0	0	0	0	0	4.24773e-05	0	0	0	0	0	0	0	0	0	0	0	0	0	0	0	0	0	0	0	0	0	0	0	0	0	0	0	0	0	0	0	0.000169909	4.24773e-05	0	0	0
OTU_1406	0	0	0	0	0	0	0	0	0	0	0	0	0	0	0	0	0	0	0	0	0	0	0	0	0	0	0	0	0	0	0	0	0	0	0	0	0	0	0	0	0	0	0	0	0	0	0	0	0
OTU_1407	0	0	0	0	0	0	0	0	0	0	0	0	0	0	0	0	0	0	0	0	0	0	0	0	0	0	0	0	0	0	0	0	0	0	0	0	0	0	0	0	0	0	0	0	0	0	0	0	0
OTU_1408	0	0	0	0	0	0	0	0	0	0	0	0	4.24773e-05	0	0	8.49545e-05	0	4.24773e-05	0.00450259	0.000382295	0.00140175	4.24773e-05	0	4.24773e-05	0	0	0.000127432	0.00254864	0.000807068	0.000722114	0.000169909	0.000127432	0.000254864	0	4.24773e-05	4.24773e-05	0	0	0	0	0	4.24773e-05	0	0	0	4.24773e-05	0.000127432	0.000127432	0
OTU_1409	0	0	0	0.000212386	0	0	0	0	0	0	0	0	0	0	0	0	0	0	0	0	0	0	0	8.49545e-05	0	0	0	0	0	0	4.24773e-05	0	0	0	0	0	0	0	0	0	4.24773e-05	0	0	0	0	0	0	0	0
OTU_141	0	0	0	0	0	0	0	0	0	0	0	0	0	0	0	0.000254864	0	0	0	0	0	0	0	0	0	0	0	0	0	0	0	0	0	4.24773e-05	0	0	0	0	0	0	0	0	0	0	0	0	0	0	0
OTU_1410	0	0	0	0	0	0	0	0	0	0	0	0	0	0	0	0	0	0	0	0	0	0	0	0	0	0	0	0	0	0	0	0	0	0	0	0	0	0	0	0	0	0	0	0	0	0	0	0	0
OTU_1411	4.24773e-05	8.49545e-05	0.000169909	0.000976977	0.000849545	0.000127432	8.49545e-05	0.00395039	0.000382295	0.00696627	0.000212386	0	0.000127432	0.000127432	4.24773e-05	8.49545e-05	0	0	0	0	0	0.0070937	0.000169909	0.000212386	0	4.24773e-05	0	4.24773e-05	0	0	0.00624416	4.24773e-05	0	0	0	0	0.000127432	0.00688132	8.49545e-05	0.000297341	4.24773e-05	8.49545e-05	0	0	0	0	0	0	0.00492736
OTU_1412	0	0	0	0	0	0	0	0	0	0	0	0	0	0	0	0	0	0	0	0	0	0	0	0	0	0	0	0	0	0	0	0	0	0	0	0	0	0	0	0	0	0	0	0	0	0	0	0	0
OTU_1413	0	0	0	0	0	0	0	0	0	0	0	0	0	4.24773e-05	0	0	0	0	0	0	0	0	0	0	0	0	0	0	0	0	0	0	4.24773e-05	0	0	0	0	0	0	0	0	8.49545e-05	0	0	0	0	0	0	0
OTU_1414	0	0	0	0	0	0	0	0	0	0	0	0	0	0	0	0	0	0	0	0	0	0	0	0	0	0	0	0	0	0	0	0	0	0	0	0	0	0	0	0	0	0	0	0	0	0	0	0	0
OTU_1415	0	0	0	0	0	0	0	0	0	0	0	0	0	0	4.24773e-05	0	0	0	0	0	0	0	0	0	0	0	0	0	0	0	0	0	0	0	0	0	0	0	0	0	0	0	0	0	0	0	0	0	0
OTU_1416	0	0	0	0	0	0	0	0	0	0	0	0	0	0	0	0	0	0	0	0	0	0	0	0	0	0	0	0	0	0	0	0	0	0	0	0	0	0	0	0	0	0	0	0	0	0	0	0	0
OTU_1417	0	0	0	0	0	0	0	0	0	0	0	0	0	0	0	0	0	0	0	0	0	0	0	0	0	0	0	0	0	0	0	0	0	0	0	0	0	0	0	0	0	0	0	0	0	0	0	0	0
OTU_1418	0	0	0	0	0	0	0	4.24773e-05	0	0	0	0	0	0	0	0	0	0	0	0	0	0	0	0	0	0	0	0	0	0	0	0	0	0	0	0	0	4.24773e-05	0	0	0	0	0	0	0	0	0	0	0
OTU_142	0	0	0	0	0	0	0	0	0	0	0	0	0	0	0	0	0	0	0	0	0	0	0	0	0	0	0	0	0	0	0	0	0	0	0	0	0	0	0	0	4.24773e-05	0	0	0	0	0	0	0	0
OTU_1421	0	0	0	0	0	0	0	0	0	0	0	0	4.24773e-05	0	8.49545e-05	0	0	0	0	0	0	0	0	0	0	0	0	0	0	0	0	0	0	0	0	0	0	0	0	0	0	0	0	0	0	0	0	0	0
OTU_1422	0	0	0	0	0	0	0	0	0	0	0	0	0	0	0	0	0	0	0	0	4.24773e-05	0	0	0	0	4.24773e-05	0	0	4.24773e-05	0	0	0	4.24773e-05	0	0	0	0	0	0	0	4.24773e-05	0	0	0	0	0	0	0	0
OTU_1424	0	0	0	0	0	0	0	0	0	0	0	0	4.24773e-05	0	0	0	0	0	0	0	0	0	0	0	0	0	0	0	0	0	0	0	0	0	0	0	0	0	0	0	0	0	0	0	0	0	0	0	0
OTU_1425	0	0	0	0	0	0	0	0	0	0	0	0	0	0	0	0	0	0	0	0	0	0	0	0	0	0	0	0	0	0	0	0	0	0	0	0	0	0	0	0	0	0	0	0	0	0	0	0	0
OTU_1426	0	0	0	0	0.000169909	0	0	0	0	0	0	0	0	0	4.24773e-05	0	0	0	0	0	0	0	0	0	0	0	0	0	0	0	0	8.49545e-05	4.24773e-05	0	0	0	0	0	0	0	0	0	0	0	0	0	0	0	0
OTU_1427	0	0	0	0	0	0	0	0	0	0	0	0	0	0	0	0	0	0	0	0	0	0	0	0	0	0	0	0	0	0	0	0	0	0	0	0	0	0	0	0	0	0	0.000424773	0	0	0	0	0	0
OTU_1428	0	0	0	0	0	0	0	0	0	0	0	0	0	0	0	0	0	0	0	0	0	0	0	0	0	0	0	0	0	0	0	0	0	0	0	0	0	0	0	0	0	0	0	0	0	0	0	0	0
OTU_1429	0	0	0	0	0	0	0	0	0	0	0	0	0	0	0	0	0	0	0	0	0	0	0	0	0	0	0	0	0	0	0	0	0	0	0	0	0	0	0	0	0	0	0	0	0	0	0	0	0
OTU_143	0	0	0	0	0	0	0	0	0	0	0	0	0	0	0	0	0	0	0	0	0.000254864	0	0	0	0	0	0	0	0	0	0	0	0	0	0	0	0	0	0	0	0	0	0	0	0	0	0	4.24773e-05	0
OTU_1430	0	0	0	0	0	0	0	0	0	0	0	0	0	0	0	0	0	0	0	0	0	0	0	0	0	0	0	0	0	0	0	0	0	0	0	0	0	0	0	0	0	0	0	0	0	0	0	0	0
OTU_1431	0	0	0	0	0	0	0	0	0	0	0	0	0	0	0	0	0	0	0	0	0	0	0	0	0	0	0	0	0	0	0	0	0	0	0	0	0	0	0	0	0	0	0	0	0	0	0	0	0
OTU_1432	0	0	0	0	0	0	0	0	0	0	0	0	0	0	0	0	0	0	0	0	0	0	0	0	0	0	0	0	0	0	0	0	0	0	0	0	0	0	0	0	0	0	0	0.000127432	0.000127432	4.24773e-05	0	0	0
OTU_1433	0	0.000127432	0	0	0	0	0.000254864	0	0	0	0	0	0	0	0	0	0	0	0	0	0	0	0	0	0	0	0	0	0	0	0	0	0	0	0	0	0	0	0	0	0	0	0	0	0	0	0	0	0
OTU_1434	0	0	0	0	0	0	0	0	0	0	0	0	0	0	0	0	0	0	0	0	0	0	0	0	0	0	0	0	0	0	0	0	0	0	0	0	0	0	0	0	0	0	0	0	0	0	0	0	0
OTU_1435	0	0	0	0	0	0	0	0	0	0	0	0	0	0	0	0	0	0	0	0	0	0	0	0	0	0	0	0	0	0	0	0	0	0	0	0	0	0	0	0	0	0	0	0	0	0	0	0	0
OTU_1436	0	0	0	0	8.49545e-05	0	0	0	0	0	0	0	0	0	4.24773e-05	0	0	0	0	0	0	0	0	0	0	0	0	0	0	0	0	0	0	0	0	0	0	0	0	0	0	0	0	0	0	0	0	0	0
OTU_1437	0	0	0	0	0	0	0	0	0	0	0	0	0	0	0	0	0	0	0	0	0	0	0	0	0	0	0	0	0	0	0	0	0	0	0	0	0	0	0	0	0	0	0	0	0	0	0	0	0
OTU_1438	0	0	0	0	0	0	0	0	0	0	0	0	0	0	0	0	0	0	0	0	0	0	0	0	0	0	0	0	0	0	0	0	0	0	0	0	0	0	0	0	0	0	0	0	0	0	0	0	0
OTU_1439	0	0	0	0	0	0	0	0	0	0	0	0	0	0	0	0	0	0	0	0	0	0	0	0	0	0	0	0	0	0	0	0	0	0	0	0	0	0	0	0	0	0	0	0	0	0	0	0	0
OTU_144	0	0	0	0	0	0	0	0	0	0	0	0	0	0	0	0	0	0	0	0	0	0	0	0	0	0	0	0	0	0	0	0	0	0	0	0	0	0	0	0	0	0	4.24773e-05	0	0	0	0	0	0
OTU_1440	0	0	0	0	0	0	0	0	0	0	0	0	0	0	0	4.24773e-05	4.24773e-05	0	0	0	0	0	0	0	0	0	0	0	0	0	0	0	0	0	0	0	0	0	0	0	0	0	0	0	0	0	0	0	0
OTU_1441	0	0	0	0	0	0	0	0	0	0	0	0	0	0	0	0	0	0	0	0	0	0	0	0	0	0	0	0	0	0	0	0	0	0	0	0	0	0	0	0	0	0	0	0	0	0	0	0	0
OTU_1442	0	0.000722114	0	0	0	0	0.00101945	4.24773e-05	0.000212386	0.00110441	0.0160139	0.066392	0.000339818	0	0.000169909	0	0	0	0	0	0	0	0.000169909	0.000424773	0	0	0	0.000552205	0	0	0	0.000169909	0	0	0	0	0	4.24773e-05	0.000339818	0.000169909	0.000339818	0	0	0	0	0	0	0	0
OTU_1443	0	0	0	0	0	0	0	0	0	0	4.24773e-05	0	0	0	0	0	0	0	0	0	0	0	0	0	0	0	0	0	0	0	0	0	0	0	0	0	0	0	0	0	0	0	0	0	0	0	0	0	0
OTU_1444	0	0	0	0	0	0	0	0	0	0	0	0	0	0	0	0	0	0	0	0	0	0	0	0	0	0	0	0	0	0	0	0	0	0	0	0	0	0	0	0	0	0	0	0	0	0	0	0	0
OTU_1445	0	0	0	0	0	0	0	0	0	0	0	0	0	0	0	0	0	0	0.000169909	0	8.49545e-05	0	0	0	0	0	0	0	0	0	0	0	0	0	4.24773e-05	0	0	0	0	0	0	0	0	0	0	0	0	0	0
OTU_1446	0	0	0	0	0	0	0	0	0	0	0	8.49545e-05	4.24773e-05	0	0	0	0	0	0	8.49545e-05	0	0	0	0	8.49545e-05	0	0	0	0	0	0	0	0	0	0	0	0	0	4.24773e-05	0	0	0	4.24773e-05	8.49545e-05	0	0	0	0	0
OTU_1447	0	0	0	0	0	8.49545e-05	0	4.24773e-05	0	4.24773e-05	0	0.000254864	0.000297341	0.000127432	0	0.000764591	4.24773e-05	0.000127432	0.0373375	0.00386543	0.0134228	0.000212386	0.000382295	0.000382295	0.000212386	0.000169909	0.000807068	0.0208563	0.00683884	0.00777334	0.00178405	0.00195395	0.0014867	0.000339818	0.00101945	0.000552205	0.00046725	8.49545e-05	0.000212386	8.49545e-05	0.000339818	0.000552205	0	0	0	0.000679636	0.000169909	0.000339818	4.24773e-05
OTU_1448	0	0	0	0	0	0	0	0	0	0	0	0	0	0	0	0	0	0	0	0	0	0	0	0	0	0	0	0	0	0	0	0	0	0	0	0	0	0	0	0	0	0	0	0	0	0	0	0	0
OTU_1449	0	0	0	0	0.000339818	4.24773e-05	0	0	0	0	0	0	0	0	0	0	0	0	0	4.24773e-05	0	0	0	0	0	4.24773e-05	0	0	0	0	0	0	0	0	0	0	0	0	0	0	0	0	0	0	0	0	4.24773e-05	0	0
OTU_145	0	0	0	0	0	0	0	0	0	0	0	0	0	0	0	0	0	0	0	0	0	0	0	0	0	0	0	0	0	0	0	0	0	0	0	0	0	0	0	0	0	0	0	0	0	0	0	0	0
OTU_1450	0	0	0	0.000254864	4.24773e-05	0	0	0	8.49545e-05	0	0	0	0	0	0	0	0	0	0	0	0	0	4.24773e-05	0	0	0	0	4.24773e-05	0	0	0	0	0	0	0	0	0	0	0	0	0	0	0	0	0	0	0	4.24773e-05	4.24773e-05
OTU_1451	0	0	0	0	0	0	0	0	0	0	0	0	0	0	0	0	0	0	0	0	0	0	0	0	0	0	0	0	4.24773e-05	0	0	0	0	0	0	0	0	0	0	0	0	0	0	0	0	0	4.24773e-05	0	0
OTU_1452	0	0	0	0	0	0	0	0	0	0	0	0	0	0	0	0	0	0	4.24773e-05	0	0	0	0	0	0	0	0	0	0	0	0	0	0	0	0	0	0	0	0	0	0	0	0	0	0	0	0	0	0
OTU_1453	0	0	0	0	0	0	0	0	0	0	0	0	0	0	0	0	0	0	8.49545e-05	0	8.49545e-05	0	0	0	4.24773e-05	0	0	0	8.49545e-05	0	0	0	0	4.24773e-05	0	4.24773e-05	0	0	0	0	0	0	4.24773e-05	0.000594682	0	0	8.49545e-05	0.000127432	0
OTU_1454	0	0	0	0	0	0	0	0	0	0	0	0	0	0	0	0	0	0	0	0	0	0	0	0	0	0	0	0	0	0	0	0	0	0	0	0	0	0	0	0	0	0	0	0.000297341	0	0	0	0	0
OTU_1455	0	0	4.24773e-05	0	0	0	0	0	0	0	0	0	0	4.24773e-05	0	0	0	0	0	0	0	0	0	0	0	0	0	0	0	0	0	0	4.24773e-05	0	0	0	0	0	0	0	0	8.49545e-05	0	0	0	0	0	0	0
OTU_1456	0	0	0	0	0	0	0	0	0	0	0	0	0	0	0	0	0	0	0	0	0	0	0	0	0	0	0	0	0	0	0	0	0	0	0	0	0	0	0	0	0	0	0	0	0	0	0	0	0
OTU_1457	0	0	0	0	0	0	0	0	0	0	0	0	0	0	0	0	0	0	0	0	0	0	0	0	0	0	0	0	0	0	0	0	0	0	0	0	0	0	0	0	0	0	0	0.000212386	0	0	0	0	0
OTU_1458	0	0	0	0	0	0	0	0	0	0	0	0	0	0	0	0	0	0	0	0	0	0	0	0	0	0	0	0	0	0	0	0	0	0	0	0	0	0	0	0	0	0	0	0	0	0	0	0	0
OTU_1459	0	0	0	0	0	0	0	0	0	0	0	0	4.24773e-05	0	0	0	0	0	0	0	0	0	4.24773e-05	0	0	0	0	0	0	0	0	0	0	0	0	0	0	0	0	0	0	0	0	0	0	8.49545e-05	4.24773e-05	8.49545e-05	0
OTU_146	0	0	0	0	0	0	0	0	0	0	0	0	0	0	0	0	0	0	0	0	0	0	0	0	0	0	0	0	0	0	0	0	0	0	0	0	0	0	0	0	0	0	0	0	0	0	0	0	0
OTU_1460	0	0	0	0	0	0	0	0	0	0	0	0	0	0	0	0	0	0	0	0	0	0	0	0	0	0	0	0	0	0	0	0	0	0	0	0	0	0	0	0	0	0	0	0	0	0	0	0	0
OTU_1461	0	0	0	0	0	0	0	0	0	0	0	0	0	0	0	0	0	0	0	0	0	0	0	0	0	0	0	0	0	0	0	0	0	0	0	0	0	0	0	0	0	0	0	0	0	0	0	0	0
OTU_1462	0	0	0	0	0	0	0	0	0	4.24773e-05	4.24773e-05	0	0	0	0	0	0	0	4.24773e-05	0.000127432	0	0	0	0	4.24773e-05	4.24773e-05	8.49545e-05	0	0	0	0	0	0	0	0	0	0.000127432	0	8.49545e-05	0	0	0	0	0	0	0	0	0	0.000127432
OTU_1463	0	0	0	0	0	0	0	0	0	0	0	0	0	0	0	0	0	0	0	0	0	0	0	0	0	0	0	0	0	0	0	0	0	0	0	0	0	0	0	0	0	0	0	0	0	0	0	0	0
OTU_1464	0	0	0	0	0	0	0	0	0	0	0	0	0	0	0	0	0	0	0	0	0	0	0	0	0	0	0	0	0	0	0	0	0	0	0	0	0	0	0	0	0	0	0	0	0	0	0	0	0
OTU_1465	0	0	0	0	0	0	0	0	0	8.49545e-05	0	0	0	0	0	0	0	0	0	0	0	0	0	0	0	0	0	0	0	0	0	0	0	0	0	0	0	4.24773e-05	0	0	0	0	0	0	0	0	0	0	0
OTU_1467	0	0	0	0	0	0	0	0	0	0	0	0	0	0	0	0	0	0	0	0	0	0	0	0	0	0	0	0	0	0	0	0	0	0	0	0	0	0	0	0	0	0	0	0	0	0	0	0	0
OTU_1468	0	0	0	0	0	0	0	0	0	0	0	0	0	0	0	0	0	0	0	0	0	0	0	0	0	0	0	0	0	0	0	0	0	0	0	0	0	0	0	0	0	0	0	0	0	0	0	0	0
OTU_1469	0	0	0	0	0	0	0	0	0	0	0	0	0	0	0	0	0	0	0	0	0	0	0	0	0	0	0	0	0	0	0	0	0	0	0	0	0	0	0	0	0	0	0	0	0	0	0	0	0
OTU_147	0	0	0	0	0	0	0	0	0	0	0	0	0	0	0	0	0	0	0	0	0	0	0	0	0	0	0	0	0	0	0	0	0	0	0	0	0	0	0	0	0	0	0	0	0	0	0	0	0
OTU_1470	0	0	0	0	0	0	0	0	0	0	0	0	0	0	0	0	0	0	0	0	0	0	0	0	0	0	0	0	0	0	0	0	0	0	0	0	0	0	0	0	0	0	0	0	0	0	0	0	0
OTU_1471	0	0	0	0	0	0	0	0	0	0	0	0	0	0	0	0	0	0	0	0	0	0	0	0	0	0	0	0	0	0	0	0	0	0	0	0	0	0	0	0	0	0	0	0	0	0	0	0	0
OTU_1472	0	0	0	0	0	0	0	0	0	0	0	0	0	0	0	0	0	0	0	0	0	0	0	0	0	0	0	0	0	4.24773e-05	0	0	0	0	0	0	0	0	0	0	0	0	0	0	0	0	0	0	0
OTU_1473	0	0	0	0	0	0	0	0	0	0	0	0	0	0	0	0	0	0	0	0	0	0	0	0	0	0	0	0	0	0	0	0	0	0	0	0	0	0	0	0	0	0	4.24773e-05	8.49545e-05	0	0	0	0	0
OTU_1474	0	0	0	0	0	0	0	0	0	0	0	0	0	0	0	0	0	0	0	0	0	0	0	0	0	0	0	0	0	0	0	0	0	0	0	0	0	0	0	0	0	0	0	0	0	0	0	0	0
OTU_1475	0	0	0	0	0	0	0	0	0	0	0	0	0	0	0	0	0	0	0	0	0	0	0	0	0	0	0	0	0	0	0	0	0	0	0	0	0	0	0	0	0	0	0	0	0	0	0	0	0
OTU_1477	0	0	0	0	0	0	8.49545e-05	0	0	0	4.24773e-05	0	0	0	0	0	0	0.000127432	0	0	0	0	0	0	0	0	0	0	0	0	0	0	0	0	4.24773e-05	0	0	0	0	0	0	0	0	0	0	0	0	0	0
OTU_1478	0	0	0	0	0	0	0	0	0	0	0	0	0	0	0	0	0	0	0	0	0	0	0	0	0	0	0	0	0	0	0	0	0	0	0	0	0	0	0	0	0	0	0	0	0	0	0	0	0
OTU_1479	0	0	0	0	0	0	0	0	0	0	0	0	0	0	0	0	0	0	0	0	0	0	0	0	0	0	0	0	0	0	0	0	0	0	0	0	0	0	0	0	0	0	0	0	0	0	0	0	0
OTU_1481	0	0	0	0	0	0	0	0	0	0	0	0	0	0	0	0	0	0	0	0	0	0	0	0	0	0	0	0	0	0	0	0	0	0	0	0	0	0	0	0	0	0	0	0	0	0	0	0	0
OTU_1482	0	0	0	0	0	0	0	0	0	0	0	0	0	0	0	0	0	0	0	0	0	0	0	0	0	0	0	0	0	0	0	0	0	0	0	0	0	0	0	0	0	0	0	0	0	0	0	0	0
OTU_1483	0	0	0	4.24773e-05	0	0	0	0	0	0	0	0	0	0	0	0	0	0	0	0	0	0	0	0	0	0	0	0	0	0	0	0	0	0	0	0	0	0	8.49545e-05	0	0	0	4.24773e-05	0	0	0	0	0	0.00046725
OTU_1484	0	0	0	0	0	0	0	0	0	0	0	0	0	0	0	0	0	0	0	0	0	0	0	0	0	0	0	0	0	0	0	0	0	0	0	0	0	0	0	0	0	0	8.49545e-05	0	8.49545e-05	0	0	0	0
OTU_1485	0	0	0	0	0	0	0	0	0	0	0	0	0	0	0	0	0	0	0	0	0	0	0	0	0	0	0	0	0	0	0	0	0	0	0	0	0	0	0	0	0	0	0	0	0	0	0	0	0
OTU_1486	0	0	0	0	0	0	0	0	0	0	0	0	0	0	8.49545e-05	0	0	0	0	0	0	0	0	0	0	0	0	0	0	0	0	0	0	0	0	0	0	0	0	0	0	0	0	0	0	0	0	0	0
OTU_1487	0	0	0	0	0	0	0	0	0	0	0	0	0	0	0	0	0	0	4.24773e-05	0	0	0	0	0	0	0	0	0	0	0	0	0	0	0	0	0	0	0	0	0	0	0	0	0	0	0	0	0	0
OTU_1488	0	0	0	0	8.49545e-05	0	0	0	0	0	0	0	0	0	0	0	0	0	0	0	0	0	0	0	0	0	0	0	0	0	0	0	0	0	0	0	0	0	0	0	0	0	0	0	0	0	0	0	0
OTU_1489	0	0	0	0	0	0	0	0	0	0	0	0	0	0	0	0	0	0	0	0	0	0	0	0	0	0	0	0	0	0	0	0	0	0	0	0	0	0	0	0	0	0	0	0.000127432	0.000509727	0	0	0	0
OTU_149	0	0	0	0	0	0	0	0	0	0	0	0	0	0	0	0	0	0	0	0	0	0	0	0	0	0	0	0	0	0	0	0	0	0	0	0	0	0	0	0	0	0	0	4.24773e-05	0	0	0	0	0
OTU_1490	0	0	0	0	0	0	0	4.24773e-05	0	0	0	0	0	0	0	0	0	0	0	0	0	0	0	0	0	0	0	0	0	0	4.24773e-05	0	0	0	0	0	0	0	0	0	0	0	0	0	0	0	0	0	0
OTU_1491	0	0	0	0	0	0	0	0	0	0	0	0	0	0	0	0	0	0	0	0	0	0	0	0	0	0	0	0	0	0	0	0	0	0	0	0	0	0	0	0	0	0	0	0	0	0	0	0	0
OTU_1492	0	0	0.000254864	0	0	0	4.24773e-05	0	0	0	0	0	0	0	0	0	0	0	0	0	0	0	0	0	0	0	0	0	0	0	0	0	0	0	0	0	0	0	0	0	0	0	0	0	0	0	0	0	0
OTU_1493	0	0	0	0	0	0	0	0	0	0	0	0	0	0	0	0	0	0	0	0	0	0	0	0	0	0	0	0	0	0	0	0	0	0	0	0	0	0	0	0	0	0	0	0	0.000127432	0	0	0	0
OTU_1494	0	0	0	0	0	0	0	0	0	0	0	0	0	0	0	0	0	0	0	0	0	0	0	0	0	0	0	0	0	0	0	0	0	0	0	0	0	0	0	0	0	0	0	8.49545e-05	0.000212386	0	0	0	0
OTU_1495	0	0	0	0	0	0	0	0	0	0	0	0	0	0	0	0	0	0	0	0	0	0	0	0	0	0	0	0	0	0	0	0	0	0	0	0	0	0	0	0	0	0	0	0	0	0	0	0	0
OTU_1496	0	0	4.24773e-05	0	0	0	0.000127432	0	0	0	4.24773e-05	0	0	0	0	0	0	0	0	0	0	0	0	0	0	4.24773e-05	0	0	0	0	0	0	0	0	0	0	0	0	0	0	0	0	0	0	0	0	0	0	0
OTU_1497	0	0	0	0	0	0	0	0	0	0	0	0	0	0	0	0	0	0	0	0	0	0	0	0	0	0	0	0	0	0	0	0	0	0	0	0	0	0	0	0	0	0	0	0	0	0	0	0	0
OTU_1498	0.000127432	0	0	0	0	0	0	0	0	0	0	0	0	0	0	0	0	0	0	0	0	0	0	0	0	0	0	0	0	0	0	0	0	0	0	0	0	0	0	0	0	0	0	0	0	0	0	0	0
OTU_1499	0	0	0	0	0	0	0	0	0	0	0	0	0	0	0	0	0	0	0	0	0	0	0	0	0	0	0	0	0	0	0	0	0	0	0	0	0	0	0	0	0	0	0	0	0	0	0	0	0
OTU_15	0	0.000212386	0.000127432	0.000169909	4.24773e-05	8.49545e-05	0.000254864	0	8.49545e-05	4.24773e-05	0.000169909	8.49545e-05	0	0	4.24773e-05	0.00730609	0.0052247	0.00463002	0.00632911	0.0115538	0.00271855	0.000849545	0.00110441	0.00046725	0.00271855	0.00263359	0.0087928	0.00348314	0.0024212	0.00488489	0.00114689	0.00297341	0.00288845	0.00293093	0.00352561	0.003738	0.000297341	0.00046725	0.00046725	0.000424773	0.000722114	0.00046725	0.000976977	0.00178405	0.00479993	0.0141449	0.0151219	0.0124034	0
OTU_150	0	0	0	0	0	0	0	0	0	0	0	0	0	0	0	0	0	0	0	0	0	0	0	0	0	0	0	0	0	0	0	0	0	0	0	0	0	0	0	0	0	0	0	0	0	0	0	0	0
OTU_1500	0	0	0	0	0	0	0	0	0	0	0	0	0	0	0	0	0	0	0	0	0	0	0	0	0	0	0	0	0	0	0	0	0	0	0	0	0	0	0	0	0	0	0	0	0	0	0	0	0
OTU_1501	0	0	0	4.24773e-05	0	0	0	0	4.24773e-05	0	0	0	0	0	0	0	0	0	0	0	0	0	0	0	0	0	0	4.24773e-05	0	0	0	0	0	0	0	0	0	0	0	0	0	0	0	0	0	0	0	0	0
OTU_1502	0	0	0	0	0	0	0	0	0	0	0	0	0	0	0	0	0	0	0	0	0	0	0	0	0	0	0	0	0	0	0	0	0	0	0	0	0	0	0	0	0	0	0	0	0	0	0	0	0
OTU_1503	0	0	0	0	0	0	0	0	0	0	0	0	0	0	0	0	0	0	0	0	0	0	0	0	0	0	0	0	0	0	0	0	0	0	0	0	0	0	0	0	0	0	0	0	0	0	0	0	0
OTU_1504	0	0	0	0	0	0	0	0	0	0	0	0	0	0	0	0	0	0	0	0	0	0	0	0	0	0	0	0	0	0	0	0	0	0	0	0	0	0	0	0	0	0	0	0	0	0	0	0	0
OTU_1505	0	0	0	0	0	0	0	0	0	0	0	0	0	0	0	0	0	0	0	0	0	0	0	0	0	0	0	0	0	0	0	0	0	0	0	0	0	0	0	0	0	0	0	0	0	0	0	0	0
OTU_1506	0	0	0	0	0	0	0	0	0	0	0	0	0	0	0	0	0	0	0	0	0	0	0	0	0	0	0	0	0	0	0	0	0	0	0	0	0	0	0	0	0	0	0	0	0	0	0	0	0
OTU_1507	0	0	0	0	0	0	0	0	0	0	0	0	0	0	0	0	0	0	0	0	0	0	0	0	0	0	0	0	0	0	0	0	0	0	0	0	0	0	0	0	0	0	0	0	0	0	0	0	0
OTU_1508	0	0	0	0	0	0	0	0	0	0	0	0	0	0	0	0	0	0	0	0	0	0	0	0	0	0	0	0	0	0	0	0	0	0	0	0	0	0	0	0	0	0	0	0	0	0	0	0	0
OTU_1509	0	0	0	0	0	0	0	0	0	0	0	0	0	0	0	0	0	0	0	0	0	0	0	0	0	0	0	0	0	0	0	0	0	0	0	0	0	0	0	0	0	0	0	0	0	0	0	0	0
OTU_151	0	0	0	0	0	0	0	0	0	0	0	0	0	0	0	0	0	0	0	0	0	0	0	0	0	0	0	0	0	0	0	0	0	0	0	0	0	0	0	0	0	0	0	0	0	0	0	0	0
OTU_1510	0	0	0	0	0	0	0	0	0	0	0	0	0	0	0	0	0	0	0	0	0	0	0	0	0	0	4.24773e-05	0	0	0	0	0	0	0	0	0	0	0	0	0	0	0	0	0	4.24773e-05	0	0	0	0
OTU_1511	0	0	0	0	0	0	0	0	0	0	0	0	0	0	0	0	0	0	0	0	0	0	0	0	0	0	0	0	0	0	0	0	0	0	0	0	0	0	0	0	0	0	0	0	0	0	0	0	0
OTU_1512	0	0	0	0	0	0	0	0	0	0	0	0	0	0	0	0	0	0	0	0	0	0	0	0	0	0	0	0	0	0	0	0	0	0	0	0	0	0	0	0	0	0	0	0	0	0	0	0	0
OTU_1513	0	0	0	0	0	0	0	0	0	0	0	0	0	0	0	0	0	0	0	0	0	0	0	0	0	0	0	0	0	0	0	0	0	0	0	0	0	0	0	0	0	0	0	0	0	0	0	0	0
OTU_1514	0	0	0	0	0	0	0	0	0	0	0	0	0	0	0	0	0	0	0	0	0	0	0	0	0	0	0	0	0	0	0	0	0	0	0	0	0	0	0	0	0	0	0	0	0	0	0	0	0
OTU_1517	0	0	0	0	0	0	0	0	0	0	0	0	0	0	0	0	0	0	0	0	0	0	0	0	0	0	0	0	0	0	0	0	0	0	0	0	0	0	0	0	0	0	0	0	0	0	0	0	0
OTU_1518	0	0	0	0	0	0	0	0	0	0	0	0	0	0	0	0	0	0	0	0	0	0	0	0	0	0	0	0	0	0	0	0	0	0	0	0	0	0	0	0	0	0	0	0	0	0	0	0	0
OTU_152	0	0	0	0	0	0	0	0	0	0	0	0	0	0	0	0	0	0	0	0	0	0	0	0	0	0	0	0	0	0	0	0	0	0	0	0	0	0	0	0	0	0	0	0	0	0	0	0	0
OTU_1520	0	0	0	0	0	0	0	0	0	0	0	0	0	0	0	4.24773e-05	0	0	0	0	0	0	0	0	0	0	0	0	0	0	0	4.24773e-05	0	0	0	0	0	4.24773e-05	0	0	0	0	0	0	0	0	0	0	0
OTU_1522	0	0	0	0	0	4.24773e-05	0	0	0	0	0	0	0	0	0	0	0	8.49545e-05	0	0	0	0	0	0	0	0	0	8.49545e-05	0	0	0	0	0	0	0	0	0	0	0	0	0	0	0	0	0	0	0	0	0
OTU_1524	0	0	0	0	0	4.24773e-05	0	0	0	0	0	0	0	0	0	4.24773e-05	0	0	0	0	0	0	0	0	0	0	0	0	0	0	0	0	0	0	0	0	0	0	0	0	0	0	0	0	0	0	0	0	0
OTU_1525	0	0	0	0	0	0	0	0	0	0	0	0	0	0	0	0	0	0	0	0	0	0	0	0	0	0	0	0	0	0	0	0	0	0	0	0	0	0	0	0	0	0	0	0	0	0	0	0	0
OTU_1526	0	0	0	0	0	0	0	0	0	0	0	0	0	0	0	0	0	0	0	0	4.24773e-05	0	0	0	0	0	0	0	8.49545e-05	0.000127432	0	0	0	0	0	0	0	0	0	0	0	0	0	0	0	0	0	0	0
OTU_1527	0.000382295	0.000212386	8.49545e-05	0	0	0.000297341	0	0	0	0	4.24773e-05	0.000297341	0.000212386	8.49545e-05	4.24773e-05	0.000976977	0.00101945	0.00123184	0	4.24773e-05	0	4.24773e-05	0	0	4.24773e-05	0	4.24773e-05	0.000849545	0.000637159	0.000807068	0.000169909	0.000849545	0.000764591	4.24773e-05	4.24773e-05	4.24773e-05	0.000212386	0	4.24773e-05	4.24773e-05	8.49545e-05	0.000127432	0	0	0	0	4.24773e-05	4.24773e-05	0
OTU_1528	0.000127432	0.000127432	0.000254864	0	8.49545e-05	4.24773e-05	0.000127432	0	0	0	0	0	4.24773e-05	0.000254864	0.000297341	0	0.000127432	4.24773e-05	4.24773e-05	0	4.24773e-05	0	0	0	4.24773e-05	4.24773e-05	0	0	4.24773e-05	0	0	0	0	0.000127432	0	0	0	0	0	4.24773e-05	0	4.24773e-05	0.00161414	0.001869	0.00161414	4.24773e-05	4.24773e-05	0	0.000339818
OTU_1529	0	0	0	0	0	0	0	0	0	0	0	0	0	0	0	0	0	0	0	0	0	0	0	0	0	0	0	0	0	0	0	0	0	0	0	0	0	0	0	0	0	0	0.00127432	0	0	0	4.24773e-05	0	0
OTU_153	0	0	0	0	0	0	0	0	0	0	0	0	0	0	0	0	0	0	0	0	0	0	0	0	0	0	0	0	0	0	0	0	0	0	0	0	0	0	0	0	0	0	0	0	0	0	0	0	0
OTU_1530	0	0	0	0	0	0	0	4.24773e-05	0	0.000254864	4.24773e-05	0	0.000127432	0	0	0	0	0	0	0	0	0.000254864	0	4.24773e-05	0	0	0	0	0	4.24773e-05	0.000297341	0	0	0	0	0	0	8.49545e-05	4.24773e-05	0	8.49545e-05	0	0	0	0	0	0	0	0.000169909
OTU_1531	0	0	0	0	0	0	0	0	0	0	0	0	0	0	0	0	0	0	0	0	0	0	0	0	0	0	0	0	0	0	0	0	0	0	0	0	0	0	0	0	0	0	0	0	0	0	0	0	0.000849545
OTU_1532	0	0	0	0	0	0	0	0	0	0	0	0	0	0	0	0	0	0	0	0	0	0	0	0	0	0	0	0	0	0	0	0	0	0	0	0	0	0	0	0	0	0	0	0	0	0	0	0	0
OTU_1533	0	0	0	0	0	0	0	0	0	8.49545e-05	0	0	0	0	0	0	0	0	0	0	0	0.000212386	0	0	0	0	0	0	0	0	0.000169909	0	0	0	0	0	0	8.49545e-05	0	0	0	0	0	0	0	0	0	0	0.000127432
OTU_1534	0	0	0	0	0	0	0	0	0	0	0	0	0	0	0	0	0	0	0	0	0	0	0	0	0	0	0	0	0	0	0	0	0	0	0	0	0	0	0	0	0	0	0	0	0	0	0	0	0
OTU_1535	0	0	0	0	0	0	0	0	0	0	0	0	0	0	0	0	0	0	0	0	0	0	0	0	0	0	0	0	0	0	0	0	0	0	0	0	0	0	0	0	0	0	0	0	0	0	0	0	0
OTU_1536	0	0	0	0	0	0	0	0	0	0	0	0	0	0	0	0	0	0	0	0	0	0	0	0	0	0	0	0	0	0	0	0	0	0	0	0	0	0	0	0	0	0	0	0	0	0	0	0	0
OTU_1537	0	0	4.24773e-05	8.49545e-05	4.24773e-05	0	0	0	8.49545e-05	4.24773e-05	0	0	4.24773e-05	0	4.24773e-05	0	0	0	0	4.24773e-05	0	0	0	0	4.24773e-05	0	0	0	0	0	0	0	0	0	0	0	0	0	0	0	0	0	0	0	0	0	0	0	0
OTU_1538	0	0	0	0	0	0	0	0	0	0	0	0	0	0	0	0	0	0	0	0	0	0	0	0	0	0	0	0	0	0	0	0	0	0	0	0	0	0	0	0	0	0	0	0	0	0	0	0	0
OTU_1539	0	0	0	0	0	0	0	0	0	0	0	0	0	0	0	0	0	0	0	0	0	0	0	0	0	0	0	0	0	0	0	0	0	0	0	0	0	0	0	0	0	0	0	0	0	0	0	0	0
OTU_154	0	0	0	0	0	0	0	0	0	0	0	0	0	0	0	0	0	0	0	0	0	0	0	0	0	0	0	0	0	0	0	0	0	0	0	0	0	0	0	0	0	0	0	0	0	0	0	0	0
OTU_1540	0	0	0	0	0	0	0	0	0	0	0	0	0	0	0	0	0	0	0	0	0	0	0	0	0	0	0	0	0	0	0	0	0	0	0	0	0	0	0	0	0	0	0	0	0	0	0	0	0
OTU_1541	0	0	0	0	0	0	0	0	0	0	0	0	0	0	0	0	0	0	0	0	0	0	0	0	0	0	0	0	0	0	0	0	0	0	0	0	0	0	0	0	0	0	0	0	0	0	0	0	0
OTU_1542	0	0	0	0	0	0	0	0	0	0	0	0	0	0	0	0	0	0	0	0	0	0	0	0	0	0	0	0	0	0	0	0	0	0	0	0	0	0	0	0	0	0	0	0	0	0	0	0	0
OTU_1543	0	0	0	0	0	0	0	0	0	0	0	0	0	0	0	0	0	0	0	0	0	0	0	0	0	0	0	0	0	0	0	0	0	0	0	0	0	0	0	0	0	0	0	0	0	0	0	0	0
OTU_1545	0	0	0	0	0	0	0	0	0	0	0	0	0	0	0	0	0	0	0	0	0	0	0	0	0	0	0	0	0	0	0	0	0	0	0	0	0	0	0	0	0	0	0	0	8.49545e-05	0	0	0	0
OTU_1546	0	0	0	0	0	0	0	0	0	0	0	0	4.24773e-05	0	0	0	0	0	0	0	0	0	0	0	0	0	0	0	0	0	0	0	0	0	0	0	0	0	0	0	0	0	0	0	0	0	0	0	0
OTU_1547	0	0	0	0	0	0	0	0	0	0	0	0	0	0	0	0	0	0	0	0	0	0	0	0	0	0	0	0	0	0.000127432	4.24773e-05	0	0	0	0	0	0	0	0	0	0	0	0	0	0	0	0	0	0
OTU_1548	0	0	0	0	0	0	0	0	0	0	0	0	0	0	0	0	0	0	0	0	0	0	0	0	0	0	0	0	0	0	0	0	0	0	0	0	0	0	0	0	0	0	0	0	0	0	0	0	0
OTU_1549	0	0	0	0	0	0	0	0	0	0	0	0	0	0	0	0	0	0	0	0	0	0	0	0	0	0	0	0	0	0	0	0	0	0	0	0	0	0	0	0	0	0	0	0	0	0	0	0	0
OTU_155	0	0	0	0	0	0	0	0	0	0	0	0	0	0	0	0	0	0	0	0	0	0	0	0	0	0	0	0	0	0	0	0	0	0	0	0	0	0	0	0	0	0	0	0	0	0	0	0	0
OTU_1551	0	0	0	0	0	0	0	0	0	0	0	0	0	0	0	0	0	0	0	0	0	0	0	0	0	0	0	0	0	0	0	0	0	0	0	0	0	4.24773e-05	0	0	0	0	0	0	0	0	0	0	0
OTU_1552	0	0	0	0	0	0	0	0	0	0	0	0	0	0	0	0	0	0	0	0	0	0	0	0	0	0	0	0	0	0	0	0	0	0	0	0	0	0	0	0	0	0	0	0	0	0	0	0	0
OTU_1553	0.0352986	0.000254864	0.0504205	0.00140175	0.00106193	0.000169909	0.000552205	4.24773e-05	8.49545e-05	0	4.24773e-05	0	0.000212386	0.000679636	0.00140175	0	0	0	0	0.000297341	0.000424773	4.24773e-05	4.24773e-05	8.49545e-05	0	0.000254864	8.49545e-05	0.000212386	0.000127432	4.24773e-05	8.49545e-05	8.49545e-05	4.24773e-05	0.000509727	8.49545e-05	0	0	0	4.24773e-05	4.24773e-05	4.24773e-05	0.000339818	0	4.24773e-05	0	0	4.24773e-05	4.24773e-05	0
OTU_1554	0	0	0	0	0	0	0	0	0	0	0	0	0	0	0	0	0	0	0	0	0	0	0	0	0	0	0	0	0	0	0	0	0	0	0	0	0	0	0	0	0	0	0	0	0	0	0	0	0
OTU_1555	0	0	0	0	0	0	0	0	0	0	0	0	0	0	0	0	0	0	0	0	0	0	0	0	0	0	0	0	0	0	0	0	0	0	0	0	0	0	0	0	0	0	0	0	0	0	0	0	0
OTU_1556	0	0	0	0	0	0	0	0	0	0	0	0	0	0	0	0	0	0	0	0	4.24773e-05	0	0	0	0	0	0	0	0	0	0	0	0	0	0	0	0	0	0	0	0	0	0	0	0	0	0	0	0
OTU_1557	0	0	0	0	0	0	0	0	0	0	0	0	0	0	0	0	0	0	0	0	0	0	0	0	0	0	0	0	0	0	0	0	0	0	0	0	0	0	0	0	0	0	0	0	0	0	0	0	0
OTU_1559	0	0	0	0	0	0	0	0	0	0	0	0	0	0	0	8.49545e-05	0.000169909	4.24773e-05	0	0	0	0	0	0	0	0	0	0	0	0	0	0	0	0	0	0	0	0	0	0	0	0	0	0	0	0	0	0	0
OTU_156	0	0	0	0	0	0	0	0	0	0	0	0	0	0	0	0	0	0	0	0	0	0	0	0	0	0	0	0	0	0	0	0	0	0	0	0	0	0	0	0	0	0	0	0	0	0	0	0	0
OTU_1560	0	0	0	0	0	0	0	0	0	0	0	0	0	0	0	0	0	0	0.000892023	0.000127432	0.000169909	0	0	4.24773e-05	0	0	0	0.000594682	0.000212386	0	0	0	4.24773e-05	0	0	0	0	0	0	0	0	0	0	0	0	4.24773e-05	0	0	0
OTU_1562	0	0	0	0	0	0	0	0	0	0	0	0	0	0	0	0	0	0	0	0	0	0	0	0	0	0	0	0	0	0	0	0	0	0	0	0	0	0	0	0	0	0	0	0	0	0	0	0	0
OTU_1563	0	0	0	0	0	0	0	0	0	4.24773e-05	4.24773e-05	0	0	0	0	0	0	0	0	0	0	0	0	0	0	0	0	0	0	0	0	0	0	0	0	0	0	0	0	0	0	0	0	0	0	0	0	0	0
OTU_1564	0	0	0	0	0	0	0	0	0	0	0	0	0	0	0	0	0	0	0	0	0	0	0	0	0	0	0	0	0	0	0	0	0	0	0	0	0	0	0	0	0	0	0	0	0	0	0	4.24773e-05	0.00135927
OTU_1565	0	0	0	0	0	0	0	0	0	0	0	0	0	0	0	0	0	0	0	0	0	0	0	0	0	0	0	0	0	0	0	0	0	0	0	0	0	0	0	0	0	0	0	0	0	0	0	0	0
OTU_1566	0	0	0	0	0	0	0	4.24773e-05	0	0.000169909	0	0	0	0	0	0	0	0	0	0	0	0.000212386	0	0	0	0	0	0	0	0	0.000339818	0	0	0	0	0	0	4.24773e-05	0	0	0	0	0	0	0	0	0	0	0.000297341
OTU_1567	0	0	0	0	0	0	0	0	0	0	0	0	0	0	0	0	0	0	0	0	0	0	0	0	0	0	0	0	0	0	0	0	0	0	0	0	0	0	0	0	0	0	0.000212386	0	8.49545e-05	0	0	0	0
OTU_1568	0.000127432	4.24773e-05	0.000169909	4.24773e-05	0	0	4.24773e-05	0	0	0	0	0	4.24773e-05	0	4.24773e-05	0	0	0	0	0	0	0	0	0	0	0	0	0	0	0	4.24773e-05	0	4.24773e-05	0	0	0	4.24773e-05	4.24773e-05	4.24773e-05	4.24773e-05	0	0	0	0	0	0	0	0	0
OTU_1569	0	0	0	0	0	0	0	0	4.24773e-05	0	0	0	0	0	0	4.24773e-05	0	4.24773e-05	0	0	0	0	0	0	0	0	0	4.24773e-05	8.49545e-05	4.24773e-05	0.000254864	0	0	0	0	0	0	0	0	0	0	0	0	0	0	0	0	0	0
OTU_157	0	0	0	0	0	0	0	0	0	0	0	0	0	0	0	0	0	0	0	0	0	0	0	0	0	0	0	0	0	0	0	0	0	0	0	0	0	0	0	0	0	0	0	0	0	0	0	0	0
OTU_1570	0	0	0	0	0	0	0	0	0	0	0	0	0	0	0	0	0	0	0	0	0	0	0	0	0	0	0	0	0	0	0	0	0	0	0	0	0	0	0	0	0	0	0	0	0	0	0	0	0
OTU_1571	0	0	8.49545e-05	0	0	0	0.000169909	0	0	0	0	0	0	0	4.24773e-05	0	0	0	0	0	0	0	0	0	0	0.000169909	0	0	0	0	0	0	0	0	0	0	0	0	0	0	0	0	0	0	0	0	0	0	0
OTU_1572	0	4.24773e-05	0	0	4.24773e-05	0	0	0	0	0	0	0	0	4.24773e-05	0	0	0	0	0	0	0	0	0	0	0	0	0	0	0	0	0	0	0	0	0	0	0	0	0	0	0	0	0	0	0	0	0	0	0
OTU_1573	0	0	0	0	0	0	0	0	0	0	0	0	0	0	0	0	0	0	0	0	0	0	0	0	0	0	0	0	0	0	0	0	0	0	0	0	0	0	0	0	0	0	0	0	0	0	0	0	0
OTU_1574	0	0	0	0	0	0	0	0	0	0	0	0	0	0	0	0	0	0	0	0	0	0	0	0	0	0	0	0	0	0	0	0	0	0	0	0	0	0	0	0	0	0	0	0	0	0	0	0	0
OTU_1575	0	0	0	0	0	0	0	0	0	0	0	0	0	0	0	0	0	0	0	0	0	0	0	0	0	0	0	0	0	0	0	0	0	0	0	0	0	0	0	0	0	0	0	0	0	0	0	0	0
OTU_1576	0	0	0	0	0	0	0	0	0	0	0	0	0	0	0	0	0	0	0	0	0	0	0	0	0	0	0	0	0	0	0	0	0	0	0	0	0	0	0	0	0	0	0	0	0	0	0	0	0
OTU_1577	0	0	0	0	0	0	0	0	0	0	0	0	0	0	0	0	0	0	0	0	0	0	0	0	0	0	0	0	0	0	0	0	0	0	4.24773e-05	0	0	0	0	0	0	0	0	0	0	0	0	0	0
OTU_1579	0	0	0	0	0	0	0	0	0	0	0	0	0	0	0	0	0	0	0	0	0	0	0	0	0	0	0	0	0	0	0	0	0	0	0	0	0	0	0	0	0	0	0	0	0	0	0	0	0
OTU_158	0	0	0	0	0	0	0	0	0	0	0	0	0	0	0	0	0	0	0	0	0	0	0	0	0	0	0	0	0	0	0	0	0	0	0	0	0	0	0	0	0	0	0	0	0	0	0	0	0
OTU_1580	0	0.000254864	4.24773e-05	8.49545e-05	4.24773e-05	0	4.24773e-05	0	0	4.24773e-05	0	0	0	0	0	0	0	4.24773e-05	4.24773e-05	4.24773e-05	4.24773e-05	0	4.24773e-05	4.24773e-05	0	0	0	0	0	0	4.24773e-05	4.24773e-05	0	4.24773e-05	0	0	4.24773e-05	4.24773e-05	0	0.000169909	8.49545e-05	0.000127432	0	0	0	4.24773e-05	0	4.24773e-05	0
OTU_1581	0	0	0	0	0	0	0	0	0	0	0	0	0	0	0	0	0	0	0	0	0	0	0	0	4.24773e-05	0	0	0	0	0	0	0	0	0	0	0	0	0	0	0	0	0	0	0	0	0	0	0	0
OTU_1582	0	0	0	0	0	0	0	0	0	0	0	0	0	0	0	0	0	0	0	0	0	0	0	0	0	0	0	0	0	0	0	0	0	0	0	0	0	0	0	0	0	0	0	0	0	0	0	0	0
OTU_1583	0	0	0	0	0	0	0	0	0	0	0	0	0	0	0	0	0	0	0	0	0	0	0	0	0	0	0	0	0	0	0	0	0	0	0	0	0	0	0	0	0	0	0	0	0	0	0	0	0
OTU_1584	0	0	0	0	0	0	0.000254864	0	0	0	0	0	0	0	0	0	0	0	4.24773e-05	0	0	0	0	0	0	0	4.24773e-05	0	0	0	0	0	0	0	0	0	0	0	0	0	0	4.24773e-05	0	0	0	0	0	0	0
OTU_1585	0	0	0	0	0	0	0	0	0	0	0	0	0	0	0	0	0	0	0	8.49545e-05	0	0	0	0	0	0	0	0	0	0	0	0	0	0	0	0	0	0	0	0	0	0	0	4.24773e-05	0	0	0	0	8.49545e-05
OTU_1588	0	0	0	0	0	0	0	0	0	0	0	0	0	0	0	0	0	0	0	0	0	0	0	0	0	0	0	0	0	0	0	0	0	0	0	0	0	0	0	0	0	0	0	0	0	0	0	0	0
OTU_1589	0	0	0	0	0	0	0	0	0	0	0	0	0	0	0	0	0	0	0	0	0	0	0	0	0	0	0	0	0	0	0	0	0	4.24773e-05	0	0	0	0	0	0	0	0	0	0	0	0	0	0	0
OTU_159	0	0	0	0	0	0	0	0	0	0	0	0	0	0	0	0	0	0	0	0	0	0	0	0	0	0	0	0	0	0	0	0	0	0	0	0	0	0	0	0	0	0	0	0	0	0	0	0	0
OTU_1590	0	4.24773e-05	4.24773e-05	0	0	0	0	0	0	0	0	0	0	0	4.24773e-05	0	0	0	0	0	0	0	0	0	0	0	0	0	0	0	0	0	0	0	0	0	4.24773e-05	0	0	0	0	0	0	0	0	0	0	0	0
OTU_1591	0	0	0	0	0	0	0	0	0	0	0	0	0	0	0	0	0	0	0	0	0	0	0	0	0	0	0	0	0	0	0	0	0	0	0	0	0	0	0	0	0	0	0	4.24773e-05	0	0	0	0	0
OTU_1592	0	0	0	0	0	0	0	0	0	0	0	0	0	0	0	0	0	0	0	0	0	0	0	0	8.49545e-05	0	0	0	0	0	0	0	0	0	4.24773e-05	0	0	0	0	0	0	0	0.0117237	0.00297341	0.00110441	4.24773e-05	0.000254864	0	0
OTU_1593	0.00764591	0.000424773	0.00700875	0.000297341	0.000424773	0.000212386	4.24773e-05	0.000212386	0.000127432	0.000169909	4.24773e-05	4.24773e-05	0.00305836	0.0013168	0.000339818	0.000339818	4.24773e-05	4.24773e-05	0.00348314	0.068261	0.00807068	0.000212386	0.00046725	0.000254864	0.000127432	0.000212386	0.000212386	0.00479993	0.00662645	0.00322827	0.000297341	0.000339818	0.000297341	0.000169909	0.000297341	0.000509727	0.00161414	0.000594682	0.000424773	0.000169909	0.000424773	0.000212386	8.49545e-05	0	0	4.24773e-05	8.49545e-05	8.49545e-05	8.49545e-05
OTU_1594	0	0	0	0	0	0	0	0	0	0	0	0	0	0	0	0	0	0	0	4.24773e-05	0	0	0	0	0	0	0	4.24773e-05	4.24773e-05	0	0	0	0	0	4.24773e-05	0	0	0	0	0	0	0	0	0	0	0	0	0	0
OTU_1595	0	0	0	0	0	0	0	0	0	0	0	0	0	0	0	0	0	0	0	0	0	0	0	0	0	0	0	0	0	0	0	0	0	0	0	0	0	0	0	0	0	0	0	0	0	0	0	0	0
OTU_1596	0.000169909	0.000892023	0.000382295	4.24773e-05	0.000212386	8.49545e-05	0.00195395	0.000127432	0.000339818	4.24773e-05	8.49545e-05	8.49545e-05	0.000169909	0.000127432	8.49545e-05	0.000892023	0.000339818	0.000722114	0.000212386	0.000297341	0.000254864	0	0.000127432	0	0	0	0	0.000127432	4.24773e-05	4.24773e-05	0.000382295	0.000254864	0.000424773	0.000127432	0.000169909	4.24773e-05	0	0	0	0	8.49545e-05	0.000169909	0	0	0	0.000127432	0.000127432	0.000127432	0
OTU_1597	0	0	0	0	0	0	0	0	0	0	0	0	0	0	0	0	0	0	0	0	0	0	0	0	0	0	0	0	0	0	0	0	0	0	0	0	0	0	0	0	0	0	4.24773e-05	0.000297341	8.49545e-05	0	4.24773e-05	0	0
OTU_1598	0	0	4.24773e-05	0	0	4.24773e-05	0	8.49545e-05	4.24773e-05	0	0.000552205	0	0	0	0	0	0	0	0	0	0	4.24773e-05	0.000212386	0	0	0	0	0	0	0	0	0.000509727	4.24773e-05	4.24773e-05	0	0	0	0	0	0.000169909	0	0	0	0	0	0	0	0	0
OTU_1599	0	0	0	0	0	0	0	0	0	0	0	0	0	0	0	0	0	0	0	0	0	0	0	0	0	0	0	0	0	0	0	0	0	0	0	0	0	0	0	0	0	0	0	0	0	0	0	0	0
OTU_16	0	0	0	0	0	0	0	0	0	0	0	0	0	0	0	0	0	0	0	0	0	0	0	0	0	0	0	0	0	0	0	0	0	0	0	0	0	0	0	0	0	0	0	0	0	0	0	0	0
OTU_160	0	0	0	0	0	0	0	0	0	0	0	0	0	0	0	0	0	0	0	0	0	0	0	0	0	0	0	0	0	0	0	0	0	0	0	0	0	0	0	0	0	0	0	0	0	0	0	0	0
OTU_1600	0	0	0	0	0	0	0	0	0	0	0	0	0	0	0	0	0	0	0	0	0	0	0	0	0	0	0	0	0	0	0	0	0	0	0	0	0	0	0	0	0	0	0	0	0	0	0	0	0
OTU_1601	0	0	0	0	0	0	0	0	0	0	0	0	0	0	0	0	0	0	0	0	0	0	0	0	0	0	0	0	0	0	0	0	0	0	0	0	0	0	0	0	0	0	0	0	0	0	0	0	0
OTU_1602	0	0	0	0	0	0	0	0	0	0	0	0	0	0	0	0	0	0	0	0	0	0	0	0	0	0	0	0	0	0	0	0	0	0	0	0	0	0	0	0	0	0	0	0	0	0	0	0	0
OTU_1603	0	0	0	0	0	0	0	0	0	0	0	0	0	0	0	0	0	0	0	0	0	0	0	0	0	0	0	0	0	0	0	0	0	0	0	0	0	0	0	0	0	0	0	0	0	0	0	0	4.24773e-05
OTU_1604	0	0	0	0	0	0	0	0	0	0	0	0	0	0	0	0	0	0	0	0	0	0	0	0	0	0	0	0	0	0	0	0	0	0	0	0	0	0	0	0	0	0	0	0	0	0	0	0	0
OTU_1605	0	0	0	0	0	0	0	0	0	0	0	0	0	0	0	0	0	0	0	0	0	0	0	0	0	0	0	0	0	0	0	0	0	0	0	0	0	0	0	0	0	0	0	4.24773e-05	0	0	0	0	0
OTU_1606	0	0	0	0	0	0	0	0	0	0	0	0	0	0	0	0	0	0	0	0	0	0	0	0	0	0	0	0	0	0	0	0	0	0	0	0	0	0	0	0	0	0	0	0	0	0	0	0	0
OTU_1607	0	0	0	0	0	0	0	0	0	0	0	0	0	0	0	0	0	0	0	0	0	0	0	0	0	0	0	0	0	0	0	0	0	0	0	0	0	0	0	0	0	0	0	0	0	0	0	0	0
OTU_1608	0	0	0	0.000169909	4.24773e-05	0	0	0	4.24773e-05	0	0	0	0	0	4.24773e-05	0	0	0	0	0	0	0	0	0	0	0	0	0	0	0	0	0	0	0	0	0	0	0	0	0	0	0	0	0	0	0	0	0	0
OTU_1609	0	0	0	4.24773e-05	0	0	4.24773e-05	4.24773e-05	0	0.000169909	4.24773e-05	0.000169909	0.000212386	0	0	0	0	0.000254864	0.000212386	0	0.000382295	0.000212386	0.000212386	0.000254864	4.24773e-05	4.24773e-05	0.000127432	0.000169909	0	4.24773e-05	0.000254864	0.000297341	4.24773e-05	4.24773e-05	0	0	0	0.000509727	0.000297341	0	0.000169909	0	4.24773e-05	0.000127432	0	0.000212386	8.49545e-05	0.00114689	0.0245943
OTU_161	0	0	0	0	0	0	0	0	0	0	0	0	0	0	0	0	0	0	0	4.24773e-05	0	0	0	0	0	0	0	0	0	0	0	0	0	0	0	0	0	0	0	0	0	0	0	0	0	0	0	0	0
OTU_1610	0	0	0	0	0	0	0	0	0	0	0	0	0	0	0	0	0	0	0	0	0	0	0	0	0	0	0	0	0	0	0	0	0	0	0	0	0	0	0	0	0	0	0	0	0	0	0	0	0
OTU_1612	0	0	0	0	0	0	0	0	0	0	0	0	0	4.24773e-05	0	0	0	0	0	0	0	0	0	0	0	0	0	0	0	0	0	0	0	0	0	0	0	0	0	0	0	0	0	0	0	0	0	0	0
OTU_1613	0	0	0	0	0	0	0	0	0	0	0	0	0	0	0	0	0	0	0	0	0	0	0	0	0	0	0	0	0	0	0	0	0	0	0	0	0	0	0	0	0	0	0	0.000127432	0	0	0	0	0
OTU_1614	0	0	0	0	0	0	0	0	0	0	0	0	0	0	0	0	0	0	0	0	0	0	0	0	0	0	0	0	0	0	0	0	0	0	0	0	0	0	0	0	0	0	0	0	0	0	0	0	0
OTU_1615	0.00110441	0.0275678	0.00743352	0.000212386	0.000169909	0.000339818	0.0706397	0.0013168	0.003738	0.00127432	0.00208139	0.00106193	0.000212386	0.000339818	0.00123184	0.000127432	0	0	0.000679636	0.000722114	0.000722114	0	0	8.49545e-05	0	0.000339818	0	0.000127432	0.000169909	4.24773e-05	8.49545e-05	0	0.000254864	0.000424773	8.49545e-05	0	0.000254864	0.000127432	4.24773e-05	4.24773e-05	0	0.000254864	0	0.000169909	0	0.0024212	0.00212386	0.00208139	4.24773e-05
OTU_1617	0	0	0	0	0	0	0	0	0	0	0	0	0	0	0	0	0	0	0	0	0	0	0	0	0	0	0	0	0	0	0	0	0	0	0	0	0	0	0	0	0	0	0	0	0	0	0	0	0
OTU_1618	0	0	0	0	0	0	4.24773e-05	0	0	0	0	0	0	0	0	0	0	0	0	0	0	0	0	0	0	0	0	0	0	0	0	0	0	0	0	0	0	0	0	0	0	0	0	0	0	0	0	0	0
OTU_1619	0	0	0	0	0	0	0	0	0	0	0	0	0	0	0	0	0	0	0	0	0	0	0	0	0	0	0	0	0	0	0	0	0	0	0	0	0	0	0	0	0	0	0	0	0	0	0	0	0
OTU_162	0	0	0	0	0	0	0	0	0	0	0	0	0	0	0	0	0	0	8.49545e-05	0.00539461	0	0	0	0	0	0	4.24773e-05	0	8.49545e-05	0	0	0	0	0	0	0	0	0	0	0	0	0	0	0	0	0	0	0	0
OTU_1620	0	0	0	0	0	0	0	0	0	0	0	0	0	0	0	0	0	0	0	0	0	0	0	0	0	0	0	0	0	0	0	0	0	0	0	0	0	0	0	0	0	0	0	0	0	0	0	0	0
OTU_1621	0	0	0	0	0	0	0	0	0	0	0	0	0	0	0	0	0	0	0	0	0	0	0	0	0	0	0	0	0	0	0	0	0	0	0	0	0	0	0	0	0	0	0	0	0	0	0	0	0
OTU_1622	0	0	0	0	0	0	0	0	0	0	0	0	0	0	0	0	0	0	0	0	0	0	0	0	0	0	0	0	0	0	0	0	0	0	0	0	0	0	0	0	0	0	0	0	0	0	0	0	0
OTU_1624	0	0	0	0	0	0	0	0	0	0	0	0	0	0	0	0	0	0	0	0	0	0	0	0	0	0	0	0	0	0	0	0	0	0	0	0	0	0	0	0	0	0	0	0	0	0	0	0	0
OTU_1625	0	0	0	0	0	0	0	0	0	0	0	0	0	0	0	0	0	0	0	0	0	0	0	0	0	0	0	0	0	0	0	0	0	0	0	0	0	0	0	0	0	0	0	0	0	0	0	0	0
OTU_1627	0	4.24773e-05	0	0	0	0	4.24773e-05	0	0	0	0	0	0	4.24773e-05	0	0	0	4.24773e-05	0	0	0	0	0	0	0	0	4.24773e-05	0.000169909	0	0.000594682	4.24773e-05	0	0.000637159	4.24773e-05	8.49545e-05	0	0	0.000127432	4.24773e-05	8.49545e-05	0	8.49545e-05	0	0	0	0	4.24773e-05	0	0
OTU_1628	0	0	0	0	0	0	0	0	0	0	0	0	0	0	0	0	0	0	0	0	0	0	0	0	0	0	0	0	0	0	0	0	0	0	0	0	0	0	0	0	0	0	0	0	0	0	0	0	0
OTU_1629	0	0	0	0	0	0	0	0	0	0	0	0	0	0	0	0	0	0	0	0	0	0	0	0	0	0	0	0	0	0	0	0	0	0	0	0	0	0	0	0	0	0	0	0	0	0	0	0	0
OTU_163	0	0	0	0	0	0	0	0	0	0	0	0	0	0	0	0	0	0	0	0	0	0	0	0	0	0	0	0	0	0	0	0	0	0	0	0	0	0	0	0	0	0	0	0	0	0	0	0	0
OTU_1630	0	0	0	0	0	0	0	0	0	0	0	0	0	0	0	4.24773e-05	0	0	0	4.24773e-05	0	0	0	0	0	0	0	8.49545e-05	0	0	0	0	0	0	4.24773e-05	0	0	0	0	0	0	0	0	0	0	0	4.24773e-05	4.24773e-05	0
OTU_1633	0	0	0	0	0	0	0	0	0	0	0	0	0	0	0	0	0	0	0	0	4.24773e-05	0	0	0	0	0	0	0	4.24773e-05	0	0	0	0	0	0	0	0	0	0	0	0	0	0.000212386	0.0164387	0	0.000169909	0.000382295	0	0
OTU_1634	0	0	0	0	4.24773e-05	0	0	0	0	0	0	0	0	0	0	0	0	0	0	0	0	0	0	0	0	0	0	0	0	0	0	0	0	0	0	0	0	0	0	0	0	0	0	0	0	0	0	0	0
OTU_1635	0	4.24773e-05	4.24773e-05	0	0	4.24773e-05	8.49545e-05	0	0	0.000594682	0.00101945	0.000212386	0.000297341	0.000382295	0.000424773	0	0	0	0	0	0	0	0	0	0	0	0	4.24773e-05	0	0	0	0	0	0	0	0	0	0	0	0	0	0	0	0	8.49545e-05	0	0	0	0
OTU_1636	0	0	0	4.24773e-05	0	0	0	0	0	0	0	0	0	0	0	0	0	0	0	0	0	0	0	0	0	0	0	0	0	0	0	0	4.24773e-05	0	0	0	0	0	0	0	0	0	0	0	0	0	0	0	0
OTU_1637	0	0	0	0	0	0	0	0	0	0	0	0	0	0	0	0	4.24773e-05	0	0	0	0	0	0	0	0	0	0	0.000509727	0.000509727	0.000509727	4.24773e-05	4.24773e-05	0	4.24773e-05	0	0	0	0	0	0	4.24773e-05	0	0	0	0	0	0	0	0
OTU_1638	0	0	0	0	0	0	0	0	0	0	0	0	0	0	0	0	0	0	0	0	0	0	0	0	0	0	0	0	0	0	0	0	0	0	0	0	0	0	0	0	0	0	0	0	0	0	0	0	0
OTU_1639	0	0	0.000509727	0	0	0	0.000594682	0	0	0	4.24773e-05	0	0	0	0.000382295	4.24773e-05	0	0	0	0	0	0	4.24773e-05	0	0	0.00046725	0	0	0	0	0	0	4.24773e-05	0.000339818	0	0	4.24773e-05	0	0	0	0	0	0	0	0	0	0	0	0
OTU_164	0	0	0	0	0	0	0	0	0	0	0	0	0	0	0	0	0	0	0	4.24773e-05	0	0	0	0	0	0	0	0	0	0	0	0	0	0	0	0	0	0	0	0	0	0	0	0	0	0	0	0	0
OTU_1640	0.207332	0.00246368	0.148628	0.00386543	0.00237873	0.000297341	0.00123184	0.000297341	0.00199643	4.24773e-05	0.00046725	0.000127432	0.000254864	0.00293093	0.00305836	0.000212386	0.000764591	0.000127432	0	4.24773e-05	0.000254864	8.49545e-05	4.24773e-05	4.24773e-05	0	0.000849545	0	0.00144423	0.000764591	0.000807068	8.49545e-05	0.000212386	0.00157166	0.000807068	0	4.24773e-05	8.49545e-05	8.49545e-05	0.000127432	0.000127432	0.000127432	0.00195395	4.24773e-05	0	4.24773e-05	0.000552205	0.000254864	0.000169909	4.24773e-05
OTU_1641	0	0	0	0	0	0	0	0	0	0	0	0	0	0	0	0	0	0	0	0	0	0	0	0	0	0	0	0	0	0	0	0	0	0	0	0	0	0	0	0	0	0	0	0	0	0	0	0	0
OTU_1642	0	0	0	0	0	0	0	0	0	0	0	0	0	0	0	0	0	0	0	0	0	0	0	0	4.24773e-05	0	0	0	0	0	0.000254864	0	4.24773e-05	4.24773e-05	4.24773e-05	8.49545e-05	0	4.24773e-05	0	0	0	0	0	0	0	0	0	0	0
OTU_1643	0	0	0	0	0	0	0	0	0	0	0	0	0	0	0	0	0	0	0	0	0	0	0	0	0	0	0	0	0	0	0	0	0	0	0	0	0	0	0	0	0	0	0	0	0	0	0	0	0
OTU_1644	0	0	0	0	0	0	0	0	0	0	0	0	0	0	0	0	0	0	0	0	0	0	0	0	0	0	0	0	0	0	0	0	0	0	0	0	0	0	0	0	0	0	0	0	0	0	0	0	0
OTU_1645	0	0	0	0	0	0	0	0	0	0	0	0	0	0	0	0	4.24773e-05	0	0	0	0	0	0	0	0	0	0	0	0	0	0	0	0	0	0	0	0	0	0	0	0	0	0	0	0	0	0	0	0
OTU_1646	0	0	0	0	0	0	0	0	0	0	0	0	0	0	0	0	0	0	0	0	0	0	0	0	0	0	0	0	0	0	0	0	0	0	0	0	0	0	0	0	0	0	0	0	0	0	0	0	0
OTU_1647	4.24773e-05	0	4.24773e-05	4.24773e-05	4.24773e-05	0	8.49545e-05	0	8.49545e-05	8.49545e-05	0	4.24773e-05	4.24773e-05	0	0.000169909	0.000339818	0.000976977	0.000169909	0.001869	0.00365305	0.00365305	8.49545e-05	0	0.000127432	0.00140175	0	0.00046725	0.000297341	0.00182652	0.000976977	0.0009345	0.000169909	0.000169909	4.24773e-05	0.000382295	0.00114689	0.000169909	0.000127432	0	4.24773e-05	8.49545e-05	0.000212386	0.0009345	0.000976977	0.000807068	0.0022513	0.0024212	0.00301589	4.24773e-05
OTU_1648	0	0	0	0	0	0	0	0	0	0	0	0	0	0	0	0	0	0	0	0	0	0	0	0	0	0	0	0	0	0	0	0	0	0	0	0	0	0	0	0	0	0	0	0	0	0	0	0	0
OTU_1649	0	0	0	0	0	0	0	0	0	0	0	0	0	0	0	0	0	0	0	0	0	0	0	0	0	0	0	0	0	0	0	0	0	0	0	0	0	0	0	0	0	0	0	0	0	0	0	0	0
OTU_165	0	0	0	0	0	0	0	0	0	0	0	0	0	0	0	0	0	0	0	8.49545e-05	0	0	0	0	0	0	0	0	0	0	0	0	0	0	0	0	0	0	0	0	0	0	0	0	0	0	0	0	0
OTU_1650	4.24773e-05	0	4.24773e-05	0	0	4.24773e-05	0	0	0	0	0	8.49545e-05	4.24773e-05	0	0	0.000892023	0.00237873	0.00191148	0	8.49545e-05	4.24773e-05	0	0	0.000127432	0.000127432	0	8.49545e-05	0.00106193	0.000722114	0.00114689	0.000169909	0.000339818	0.000382295	8.49545e-05	4.24773e-05	8.49545e-05	8.49545e-05	0	8.49545e-05	8.49545e-05	0	0	0	0	0	0.000127432	8.49545e-05	0.000127432	0
OTU_1651	0	0	0	0	0	0	0	0	0	0	0	0	0	0	0	0	0	0	0	0	0	0	0	0	0	0	0	0	0	0	0	0	0	0	0	0	0	0	0	0	0	0	0	0	0	0	0	0	0
OTU_1652	0	0	0	0	0	0	0	0	0	0	0	0	0	0	0	0	0	0	0	0	0	0	0	0	0	0	0	0	0	0	0	0	0	0	0	0	0	0	0	0	0	0	0	0	0	0	0	0	0
OTU_1653	4.24773e-05	0	0	0	0	0	0	0	0	0	0	0	0	0	0	0	0	4.24773e-05	0	4.24773e-05	4.24773e-05	0	0	0	0	0	0	0	4.24773e-05	0	4.24773e-05	4.24773e-05	0	0	0	0	0	0	0	0	4.24773e-05	0	0	0	0	4.24773e-05	8.49545e-05	0.000127432	0
OTU_1654	0	0	0	0	0	0	4.24773e-05	0	0	0	0	0	0	0	0	0	0	0	0	0	0	0	0	0	0	0	0	0	0	0	0	0	0	0	0	0	0	0	0	0	0	0	0	0	0	0	0	0	0
OTU_1655	0	0	0	0	0	0	0	0	0	0	0	0	0	0	0	0	0	0	0	0	0	0	0	0	0	0	0	0	0	0	0	0	0	0	0	0	0	0	0	0	0	0	0	0	0	0	0	0	0
OTU_1656	0	0	0	0	0	0	0	0	0	0	0	0	0	0	0	0	0	0	0	0	0	0	0	0	0	0	0	0	0	0	0	0	0	0	0	0	0	0	0	0	0	0	4.24773e-05	0	8.49545e-05	4.24773e-05	0	0	0
OTU_1657	0	0	0	0	0	0	0	0	0	0	0	0	0	0	0	0	0	0	0	0	0	0	0	0	0	0	0	0	0	0	0	0	0	0	0	0	0	0	0	0	0	0	0	0	8.49545e-05	0	0	0	0
OTU_1658	0	0	0	0	0	0	0	0	0	0	0	0	0	0	0	0	0	0	0	0	0	0	0	0	0	0	0	0	0	0	0	0	0	0	0	0	0	0	0	0	0	0	0	0	0	0	0	0	0
OTU_1659	0	0	0	0	0	0	0	0	0	0	0	0	0	0	0	0	0	0	0	0	0	0	0	0	0	0	0	0	0	0	0	0	0	0	0	0	0	0	0	0	0	0	0.000169909	0	0	0	0	0	0
OTU_166	0	0	0	0	0	0	0	0	0	0	0	0	0	0	0	0	0	0	0	0	0	0	0	0	0	0	0	0	0	0	0	0	0	0	0	0	0	0	0	0	0	0	0	0	0	0	0	0	0
OTU_1660	0	0	0	0	0	0	0	0	0	0	0	0	0	0	0	0	0	0	0	0	0	0	0	0	0	0	0	0	0	0	0	0	0	0	0	0	0	0	0	0	0	0	0	0	0	0	0	0	0
OTU_1661	0	0	0	0	0	0	0	0	0	0	0	0	0	0	0	4.24773e-05	0	0	0	0	0	0	0	0	0	0	0	0	0	0	0	0	0	0	0	0	0	0	0	0	0	0	0	0	0	0	0	0	0
OTU_1662	0	0	0	0	0	4.24773e-05	0	0	0	0	0	4.24773e-05	0	0	0	0	0	4.24773e-05	0	0	0	0	0	0	0	0	0	0	4.24773e-05	0	0	0	0	0	0	0	0	0	0	0	0	0	0	0	0	0	0	0	0
OTU_1663	0	0	0	0	0	0	0	0	0	0	0	0	0	0	0	0	0	0	0	0	0	0	0	0	0	0	0	0	0	0	0	0	0	0	0	0	0	0	0	0	0	0	0	0	0	0	0	0	0
OTU_1664	0	0	0	0	0	0	0	0	4.24773e-05	0	0	0	4.24773e-05	0	0	0	0	0	0	0	0	0	0	0	0	0	0	0	0	0	0	0	0	0	0	0	0	0	0	0	0	0	0	0	0	0	0	0	0
OTU_1665	0	0	0	0	0	0	0	0	0	0	0	0	0	0	0	0	0	0	4.24773e-05	0	4.24773e-05	0	0	0	0	0	0	0	0	0	0	0	0	0	4.24773e-05	0	0	0	0	0	0	0	0	0	0	0	0	0	0
OTU_1666	0	0	0	0	0	0	0	0	0	0	0	0	0	0	0	0	0	0	0	0	0	0	0	0	0	0	0	0	0	0	0	0	0	0	0	0	0	0	0	0	0	0	0	0	0	0	0	0	0
OTU_1667	0.000254864	4.24773e-05	0.000254864	0	0	4.24773e-05	0	0	0	0	0	4.24773e-05	4.24773e-05	4.24773e-05	0	0.000382295	0.000552205	0.000594682	4.24773e-05	4.24773e-05	0.000382295	0.000127432	8.49545e-05	0.000297341	0.000169909	8.49545e-05	0.000127432	0.00110441	0.000764591	0.000807068	0	0.000212386	4.24773e-05	0	8.49545e-05	8.49545e-05	0	4.24773e-05	0	4.24773e-05	4.24773e-05	0	4.24773e-05	0	0	0.00046725	0.0009345	0.00046725	0
OTU_1668	0	0	0	0	0	0	0	0	0	0	0	0	0	0	0	0	0	0	0	0	0	0	0	0	0	0	0	0	0	0	0	0	0	0	0	0	0	0	0	0	0	0	0	0	0	0	0	0	0
OTU_1669	0	0	0	0	0	0	0	0	0	8.49545e-05	0	0	0	0	0	0	0	0	0	0	0	0.000212386	0	0	4.24773e-05	0	4.24773e-05	0	0	0	0.000127432	0	0	0	0	0	0	8.49545e-05	0	0	0	0	0.00157166	0.00046725	4.24773e-05	0.00110441	0.000552205	0.000424773	0.000637159
OTU_167	0	0	0	0	0	0	0	0	0	0	0	0	0	0	0	0	0	0	0	0	0	0	0	0	0	0	0	0	0	0	0	0	0	0	0	0	0	0	0	0	0	0	0	0	0	0	0	0	0
OTU_1670	0.000976977	0	0.000382295	8.49545e-05	4.24773e-05	0	0	0	0	0	0	0	0	0	0	0	0	0	0	0	0	0	0	0	0	4.24773e-05	0	4.24773e-05	4.24773e-05	0	0	0	0	0	0	0	4.24773e-05	0	0	0	0	4.24773e-05	0	0	0	0	0	0	0
OTU_1671	0	0	0	0	0	0	0	0	0	0	0	0	0	0	0	0	0	0	0	0	0	0	0	0	0	0	0	0	0	0	0	0	0	0	0	0	0	0	0	0	0	0	0	0	0	0	0	0	0
OTU_1672	0	0	0	0	0	0	0	0	0	0	0	0	0	0	0	0	0	0	0	0	0	0	0	0	0	0	0	0	0	0	0	0	0	0	0	0	0	0	0	0	0	0	0	0	0	0	0	0	0
OTU_1673	0	0	0	0	0	0	0	0	0	0	0	0	0	0	0	0	0	0	0	0	0	0	0	0	0	0	0	0	0	0	0	0	0	0	0	0	0	0	0	0	0	0	0	0	0	0	0	0	0
OTU_1674	0	0	0	0	0	0	0	0	0	0	0	0	0	0	0	0	0	0	0	0	0	0	0	0	0	0	0	0	0	0	0	0	0	0	0	0	0	0	0	0	0	0	0	0	0	0	0	0	0
OTU_1675	0	0	0	0	0	0	0	0	0	0	0	0	0	0	0	0	0	0	0	0	0	0	0	0	0	0	0	0	0	0	0	0	0	0	0	0	0	0	0	0	0	0	0.000169909	0.000127432	0	0	0	0	0
OTU_1676	0	0	0	0	0	0	0	0	0	0	0	0	0	0	0	0	0	0	0	0	0	0	0	0	0	0	0	0	0	0	0	0	0	0	0	0	0	0	0	0	0	0	0	0	0	0	0	0	0
OTU_1678	0	0	0	0	0	0	0	0	0	0	0	0	0	0	0	0	0	0	0	0	0	0	0	0	0	0	0	0	0	0	0	0	0	0	0	0	0	0	0	0	0	0	0	0	0	0	0	0	0
OTU_1679	0	0	0	0	4.24773e-05	8.49545e-05	4.24773e-05	0	0	0	0	0.000127432	0	0	4.24773e-05	4.24773e-05	0	4.24773e-05	4.24773e-05	4.24773e-05	0	0.000976977	0.00165661	0.000892023	0.00182652	0.000509727	0.000764591	0.00140175	0.00271855	0.000382295	0.000552205	0.00046725	0.000254864	8.49545e-05	8.49545e-05	0	0.000212386	0.000679636	0.00658398	4.24773e-05	0.000552205	0.000127432	0.000127432	0	0	0.000127432	0.000297341	4.24773e-05	4.24773e-05
OTU_1682	0	0	0	0	0	0	0	0	0	0	0	0	0	0	0	0	0	0	0	0	0	0	0	0	0	0	0	0	0	0	0	0	0	0	0	0	0	0	0	0	0	0	0	0	0	0	0	0	0
OTU_1683	0	0	0	0	0	0	0	0	0	0	0	0	0	0	0	0	0	0	8.49545e-05	0	0.000127432	0	0	0	0.000212386	0	8.49545e-05	0	4.24773e-05	0	0	0	0	0	8.49545e-05	4.24773e-05	0	0	0	0	0	0	0.015037	0.0147396	0.0113839	0.00828307	0.00509727	0.00705123	0
OTU_1684	0	0	0	0	0	0	0	0	0	0	0	0	0	0	0	0	0	4.24773e-05	0	0	0	0	0	4.24773e-05	0	0	0.000169909	0	0	0	0	0	0	0	4.24773e-05	0	0	8.49545e-05	0	0	8.49545e-05	0	0	0	0	0	0	0	0
OTU_1685	0.0013168	0	0.00123184	4.24773e-05	0	0	0	0	0	0	0	0	0	4.24773e-05	0	0	0	0	0	0	0	0	0	0	0	0	0	0	0	0	0	0	0	8.49545e-05	0	0	0	0	0	0	0	4.24773e-05	0	0	0	0	4.24773e-05	0	0
OTU_1686	0	0	0	0	0	0	0	0	0	0	0	0	4.24773e-05	0	0	0	0	0	0	0	0	0	0	0	0	0	0	0	0	0	0	0	4.24773e-05	0	0	0	0	0	0	0	0	0	0	0	0	0	0	0	0
OTU_1687	0	0	0	0	0	0	0	0	0	0	0	0	0	0	0	0	0	0	0	0	0	0	0	0	0	0	0	0	0	0	0	0	0	0	0	0	0	0	0	0	0	0	0	0	0	0	0	0	0
OTU_1688	0	0	0	0	0	0	0	0	0	0	0	0	0	0	0	0	0	0	0	0	0	0	0	0	0	0	4.24773e-05	0	0	0	0	0	4.24773e-05	0	0	0	0	0	0	0	0	0	0	0	0	0	0.000509727	0.000169909	4.24773e-05
OTU_1689	0	0	0	0	0	0	0	0	0	0	0	0	0	0	0	0	0	0	0	0	0	0	0	0	0	0	0	0	0	0	0	0	0	0	0	0	0	0	0	0	0	0	0	0	0	0	0	0	4.24773e-05
OTU_169	0	0	0	0	0	0	0	0	0	0	0	0	0	0	0	0.000127432	0	0	0	0	0	0	0	0	0	0	0	0	0	0	0	0	0	0	0	0	0	0	0	0	0	0	0	0	0	0	0	0	0
OTU_1690	0	0	0	0	0	0	0	0	0	0	0	0	0	0	0	0	0	0	0.000297341	0.000339818	0.00169909	4.24773e-05	4.24773e-05	0	0.000127432	4.24773e-05	0.000127432	0	4.24773e-05	0.000509727	4.24773e-05	4.24773e-05	0	4.24773e-05	0	0.000169909	0	0	0	0	0.000254864	0	0	0	0	0.000212386	0.000254864	8.49545e-05	0
OTU_1691	0	0	0	0	4.24773e-05	0	0	0	0	0	0	0	0	0	0	0	0	0	0	0	0	0	0	0	0	0	0	0	0	0	0	0	0	0	0	0	0	0	0	0	0	0	0.000976977	0.00191148	0.00301589	8.49545e-05	8.49545e-05	4.24773e-05	0
OTU_1692	0	0	0	0	0	0	0	0	0	0	0	0	0	0	0	0	0	0	0	0	0	0	0	0	0	0	0	0	0	0	0	0	0	0	0	0	0	0	0	0	0	0	0	0	0	0	0	0	0
OTU_1693	0	0	0	0	0	0	0	0	0	0	0	0	0	0	0	0	0	0	0	0	0	0	0	0	0	0	0	0	0	0	0	0	0	0	0	0	0	0	0	0	0	0	0	0	0	0	0	0	0
OTU_1694	0	0	0	0	0	0	0	0	0	0	0	0	0	0	0	0	0	0	0	0	0	0	0	0	4.24773e-05	0	0	0	0	0	0	0	0	0	0	0	0	4.24773e-05	0	0	0	0	0	0	0	0	0	0	0
OTU_1695	0	0	0	0.000169909	0	0	0	0	0.000382295	0	0	0	0	4.24773e-05	0	4.24773e-05	0	0	0	0	0	0	0	0	0	0	0	0	0	0	4.24773e-05	0	4.24773e-05	0	0	0	0	0	0	0	0	0	0	0	0	0	0	0	0
OTU_1696	0	0	0	0	0	0	0	0	0	0	0	0	0	0	0	0	0	0	0	0	0	0	0	0	0	0	0	0	0	0	0	0	0	0	0	0	0	0	0	0	0	0	0	0	0	0	0	0	0
OTU_1697	8.49545e-05	0	0	0	0	0	0	0	0	0	0	4.24773e-05	0	4.24773e-05	0	0.000169909	0	8.49545e-05	0	0.000127432	4.24773e-05	0	0	0	0	0	0	4.24773e-05	0	0	4.24773e-05	8.49545e-05	8.49545e-05	0	0	0	0	0	0	0	0	0	0	0	0	0	8.49545e-05	0	0
OTU_1698	0	0	0	0	0.000127432	0	0	0	0	0	0	0	0	0	0	0	0	0	0	0	0	0	0	0	0	0	0	0	0	0	0	0	0	0	0	0	0	0	0	0	0	0	0	0	0	0	0	0	4.24773e-05
OTU_1699	0	0	0	0	0	0	0	0	0	0	0	4.24773e-05	4.24773e-05	0	0	0	0	0	0	0	0	0	0	4.24773e-05	0	0	0	0	0	0	0	4.24773e-05	0	0	0	0	0	0	0	0	4.24773e-05	0	0	0	0	0	0	0	0
OTU_17	0	0	0	0	0	0	0	0	0	0	0	0	0	0	0	0	0	0	0	0	0	0	0	0	0	0	0	0	0	0	0	0	0	0	0	0	0	0	0	0	0	0	0	0	0	0	0	0	0
OTU_170	0	0	0	0	0	0	0	0	0	0	0	0	0	0	0	0	0	0	0	0	0	0	0	0	0	0	0	0	0	0	0	0	0	0	0	0	0	0	0	0	0	0	0	0	0	0	0	0	0
OTU_1700	0	0	0	0	0	0	0	0	0	0	0	0	0	0	0	0	0	0	0	0	0	0	0	0	0	0	0	0	0	0	0	0	0	0	0	0	0	0	0	0	0	0	0	0	0	0	0	0	0
OTU_1701	0	0	0	0	0	0	0	0	0	0	0	0	0	0	0	0	0	0	8.49545e-05	0	4.24773e-05	0	0	0	0.000169909	0	0	0	0	0	0	0	0	0	0	0	0	0	0	0	0	0	0	0	0	0	0	0	0
OTU_1702	0	0	0	0	0	0	0	0	0	0	0	0	0	0	0	0	0	0	0	0	0	0	0	0	0	0	0	0	0	0	0	0	0	0	0	0	0	0	0	0	0	0	0	0	0	0	0	0	0
OTU_1703	0	0	0	0	0	0	0	0	0	0	0	0	0	0	0	0	0	0	0	0	0	0	0	0	0	0	0	0	0	0	0	0	0	0	0	0	0	0	0	0	0	0	0	0	0	0	0	0	0
OTU_1704	0	0	0	0	0	0	0	0	0	0	0	0	0	0	0	0	0	0	0	0	0	0	0	0	0	0	0	0	0	0	0	0	0	0	0	0	0	0	0	0	0	0	0	0	0	0	0	0	0
OTU_1705	0	0	0	0	0	0	0	0	0	0	0	0	0	0	0	0	0	0	0	0	0	0	0	0	0	0	0	0	0	0	0	0	0	0	0	0	0	0	0	0	0	0	0	0	0	0	0	0	0
OTU_1706	0	0	0	0	0	0	0	0	0	0	0	0	0	0	0	0	0	0	0	0	0	0	0	0	0	0	0	0	0	0	0	0	0	0	0	0	0	0	0	0	0	0	0	0	0	0	0	0	0
OTU_1707	0	4.24773e-05	4.24773e-05	0	0	0.000254864	0	0	0	0.000127432	0	8.49545e-05	8.49545e-05	4.24773e-05	0	0.0136777	0.000212386	0.000339818	0.011299	4.24773e-05	0.000254864	8.49545e-05	8.49545e-05	4.24773e-05	0.000637159	0.00106193	0.000764591	0.000297341	4.24773e-05	0.000169909	8.49545e-05	4.24773e-05	0.000169909	0.000509727	8.49545e-05	0	0.000127432	0.00046725	0.000552205	4.24773e-05	0.000339818	0.000254864	0.00339818	0.00135927	0.00700875	0.000297341	4.24773e-05	8.49545e-05	0.000764591
OTU_1708	0	0	0	0	0	0	0	0	0	0	0	0	0	0	0	0	0	0	0	0	0	0	0	0	0	0	0	0	0	0	0	0	0	0	0	0	0	0	0	0	0	0	0	0	0	0	0	0	0
OTU_1709	0	0	0	0	0	0	0	0	0	0	0	0	0	0	0	0	0	0	0	0	0	0	0	0	0	0	0	0	0	0	0	0	0	0	0	0	0	0	0	0	0	0	0	0	0	0	0	0	0
OTU_171	0	0	0	0	0	0	0	0	0	0	0	0	0	0	0	4.24773e-05	0	0	0	0	0	0	0	0	0	0	0	0	0	0	0	0	0	0	0	0	0	0	0	0	0	0	0	0	0	0	0	0	0
OTU_1710	0	0	0	0	0	0	0	0	0	0	0	4.24773e-05	0	0	0	0	4.24773e-05	8.49545e-05	0.0013168	0.00310084	0.00152918	0	0	4.24773e-05	0.000127432	8.49545e-05	0.000169909	8.49545e-05	0.000297341	0.000127432	8.49545e-05	4.24773e-05	0	0	0.000169909	0.000127432	0.000339818	0	4.24773e-05	0.000382295	8.49545e-05	0	0.000169909	0.000212386	0	0.0098972	0.0110016	0.0117662	0
OTU_1711	0	0	0	0	0	0	0	0	0	0	0	0	0	0	0	0	0	0	0	0	0	0	0	0	0	0	0	0	0	0	0	0	0	0	0	0	0	0	0	0	0	0	0	4.24773e-05	0	0	4.24773e-05	0	0
OTU_1712	0	0	0	0	0	4.24773e-05	0	0	0	0	0	0	0	0	0	0	0	0	0	0	0	0	0	0	0	0	0	0	0	0	0	0	0	0	0	0	0	0	0	0	0	0	0	0	0	0	0	0	0
OTU_1713	0	0	0	0	0	0	0	0	0	0	0	0	0	0	0	0	0	0	0	0	0	0	0	0	0	0	0	0	0	0	0	0	0	0	0	0	0	0	0	0	0	0	4.24773e-05	0	8.49545e-05	0	0	0	0
OTU_1714	0	0	0	0	0	0	0	0	0	0	0	0	0	0	0	0	0	0	0	0	0	0	0	0	0	0	0	0	0	0	0	0	0	0	0	0	0	0	0	0	0	0	0	0	0	0	0	0	0
OTU_1715	0	0	0	0	0	0	0	0	0	0	0	0	0	0	0	0	0	0	0	0	0	0	0	0	0	0	0	0	0	0	0	0	0	0	0	0	0	0	0	0	0	0	0	0	0	0	0	0	0
OTU_1716	0	0	0	0	0	0	0	0	0	0	0	0	0	0	0	0	0	0	0	0	0	0	0	0	0	0	0	0	0	0	0	0	0	0	0	0	0	0	0	0	0	0	0	0	0	0	0	0	0
OTU_1717	0	0	0	0	0	0	0	0	0	0	0	0	0	0	0	0	0	0	0	0	0	0	0	0	0	0	0	0	0	0	0	0	0	0	0	0	0	0	0	0	0	0	0	0	0	0	4.24773e-05	0	0
OTU_1719	0	0	0	0	0	0	0	0	0	0	0	0	0	0	0	0	0	0	0	0	0	0	0	0	0	0	0	0	0	0	0	0	0	0	0	0	0	0	0	0	0	0	0	0	0	0	0	0	0
OTU_172	0	0	0	0	0	0	0	0	0	0	0	0	0	0	0	0	0	0	0	0	0	0	0	0	0	0	0	0	0	0	0	0	0	0	0	0	0	0	0	0	0	0	0	0	0	0	0	0	0
OTU_1720	0	0	0	0.000424773	0	0.000424773	0	0.000382295	0.0228103	0	0	0	0.000169909	0.000169909	0.000339818	4.24773e-05	0	0	0	0	0	0	0	0	0	0	0	0	0	0	0	4.24773e-05	0	0	0	0	0	0	0	0	0	0	0	0	0	0	0	0	8.49545e-05
OTU_1721	0	0	0	0	0	0	0	0	0	0	0	0	0	0	0	0	0	0	0	0	0	0	0	0	0	0	0	0	0	0	0	0	0	0	0	0	0	0	0	0	0	0	0	0	0	4.24773e-05	0	0	0
OTU_1722	0	0	0	0	0	0	0	0	0	0	0	0	0	0	0	0	0	0	0	0	0	0	0	0	0	0	0	0	0	0	0	0	0	0	0	0	0	0	0	0	0	0	8.49545e-05	0	0	0	0	0	0
OTU_1723	0	0	0	0	0.000127432	0	0	0	0	0	0	0	0	0	0	0	0	8.49545e-05	0	0	0	0	0	0	0	0	0	0	0	0	0	0	0	0	0	0	0	0	0	0	0	0	8.49545e-05	0.000127432	0.000339818	0	0	0	0
OTU_1725	8.49545e-05	8.49545e-05	0	4.24773e-05	4.24773e-05	4.24773e-05	0	4.24773e-05	0	8.49545e-05	0	4.24773e-05	0.000169909	0.000127432	0.000127432	0.00118936	0.000679636	0.000552205	0.0089627	0.00327075	0.00688132	0.000254864	0.000424773	0.000169909	0.000679636	0.00123184	0.000679636	0.000637159	0.00191148	0.00123184	0.00110441	0.000764591	0.000127432	0.00046725	0.00046725	0.000976977	0.00110441	0.000382295	0.000212386	0.000212386	8.49545e-05	0.000254864	0.00254864	0.00756095	0.00488489	0.0411605	0.0334721	0.0310509	0
OTU_1728	0	0	0	0	0	0	0	0	0	0	0	0	0	0	0	0	0	0	0	0	0	0	0	0	0	0	0	0	0	0	0	0	0	0	0	0	0	0	0	0	0	0	0	4.24773e-05	0	0	0	0	0
OTU_1729	0	0	0	0	0	0	0	0	0	0	0	0	0	0	0	0	0	0	0	4.24773e-05	0	0	0	0	0	0	0	8.49545e-05	0	4.24773e-05	0	0	4.24773e-05	4.24773e-05	4.24773e-05	4.24773e-05	0	0	0	0	0	0	0	0	0	0	0	0	0
OTU_173	0	0	0	0	0	0	0	0	0	0	0	0	0	0	0	0	0	0	0	0	0	0	0	0	0	0	0	0	0	0	0	0	0	0	0	0	0	0	0	0	0	0	0	0	0	0	0	0	0
OTU_1730	0	0	0	0	0	0	0	0	0	0	0	0	0	0	0	0	0	0	0	0	0	0	0	0	0	0	0	0	0	0	0	0	0	0	0	0	0	0	0	0	0	0	0	0	0	0	0	0	0
OTU_1731	0	0	0	0	0	0	0	0	0	0	0	0	0	0	0	0	0	0	0	0	0	0	0	0	0	0	0	0	0	0	0	0	0	0	0	0	0	0	0	0	0	0	0	0	0	0	0	0	0
OTU_1732	0	0	0	0	0	0	0	0	0	0	0	0	0	0	0	0	0	0	0	0	0	0	0	0	0	0	0	0	0	0	0	0	0	0	0	0	0	0	0	0	0	0	0	0	0	0	0	0	0
OTU_1734	0	0	0	0	0	0	0	0	0	0	0	0	0	0	0	0	0	0	0	0	0	0	0	0	0	0	0	0	0	0	0	0	0	0	0	0	0	0	0	0	0	0	0	0	0	0	0	0	0
OTU_1735	0	0	0	0	0	0	0	0	0	0	0	0	0	0	0	0	0	0	0	0	0	0	0	0	0	0	0	0	0	0	0	0	0	0	0	0	0	0	0	0	0	0	0	4.24773e-05	0	0	0	0	0
OTU_1736	0	0	0	0	0	0	0	0	0	0	0	0	0	0	0	0	0	0	0	0	0	0	0	0	0	0	0	0	0	0	0	0	0	0	0	0	0	0	0	0	0	0	0	0	0	0	0	0	0
OTU_1737	0	0	0	0	0	0	0	0	0	0	0	0	0	0	0	0	0	0	0	0	0	0	0	0	0	0	0	0	0	0	0	0	0	0	0	0	0	0	0	0	0	0	0	0	0	0	0	0	0
OTU_1738	0	0	0	0	0	0	0	0	0	0	0	0	0	0	0	0	0	0	0	0.000127432	0	0	0	0	0	0	0	0	0	0	0	0	0	0	0	0	0	0	0	0	0	0	0	0	4.24773e-05	0	0	0.000127432	0
OTU_1739	0	0	0	0	0	0	0	0	0	0	0	0	0	0	0	0	0	0	0	0	0	0	0	0	0	0	0	0	0	0	0	0	0	0	0	0	0	0	0	0	0	0	0	0.00263359	0	4.24773e-05	0	0	0
OTU_174	0	0	0	0	0	0	0	0	0	0	0	0	0	0	0	0	0	0	0	0.000339818	0	0	0	0	0	0	0	0	0	0	0	0	0	0	0	0	0	0	0	0	0	0	0	0	0	0	0	0	0
OTU_1740	0	0	0	0	0	0	0	0	0	0	0	0	0	0	0	0	0	0	0	0	0	0	0	0	0	0	0	0	0	0	0	0	0	0	0	0	0	0	0	0	0	0	0	0	8.49545e-05	0	0	0	0
OTU_1741	0	0	0	0	0	0	0	0	0	0	0	0	0	0	0	0	0	0	0	0	0	0	0	0	0	0	0	0	0	0	0	0	0	0	0	0	0	0	0	0	0	0	0	0.000212386	0	0	4.24773e-05	0	0
OTU_1742	0	0.000424773	0.000127432	4.24773e-05	0	0.000382295	0.00773086	0.000127432	0.000552205	0.000382295	0.000127432	0.000212386	4.24773e-05	0	0.000169909	0.000382295	0.000169909	0.000127432	0.00509727	0.000679636	0.00114689	0.000892023	0.000552205	0.000764591	0.00276102	0.00165661	0.00182652	0.00237873	0.00127432	0.0547957	0.00322827	0.0100246	0.003738	0.00229377	0.00046725	0.000127432	0.00191148	0.00399286	0.00369552	0.00140175	0.00195395	0.00237873	0.00144423	0.000127432	0	0.00191148	0.00195395	0.00203891	0.000679636
OTU_1743	0	0	0	0	0	0	0	0	0	0	0	0	0	0	0	0	0	0	0	0	0	0	0	0	0	0	0	0	0	0	0	0	0	0	0	0	0	0	0	0	0	0	0.000339818	0	0	0	0	0	0
OTU_1744	0	0	0	0	0	0	0	0	0	4.24773e-05	0	0	0	0	0	0	0	0	0	0	0	0	0	0	0	0	0	0	0	0	0	0	0	0	0	0	0	0	0	0	0	0	0.000127432	0	0	0	4.24773e-05	0	0
OTU_1745	0	0	0	0	0	0	0	0	0	0	0	0	0	0	0	0	0	0	0	0	0	0	0	0	0	0	0	0	0	0	0	0	0	0	0	0	0	0	0	0	0	0	4.24773e-05	0	0.000169909	4.24773e-05	4.24773e-05	4.24773e-05	0
OTU_1746	0	0	0	0	0	0	0	0	0	0	0	0	0	0	0	0	0	0	0	0	0	0	0	0	0	0	0	0	0	0	0	0	0	0	0	0	0	0	0	0	0	0	0	0	0	0	0	0	0
OTU_1747	0	0	0	0	0	0	0	0	0	0	0	0	0	0	0	0	0	0	0	0	0	0	0	0	0	0	0	0	0	0	0	0	0	0	0	0	0	0	0	0	0	0	4.24773e-05	4.24773e-05	0	0	0	0	0
OTU_1748	0.000127432	0.000127432	0.00284598	0.00620168	0	0.000297341	0.00454507	0.000127432	0.0031858	0.000254864	0.00046725	0.00212386	0.00178405	0.000169909	0.00267607	0.000169909	8.49545e-05	0.000254864	8.49545e-05	0.000679636	0.00237873	0.000424773	0.000169909	0.00212386	0.00484241	0.00492736	8.49545e-05	0.00152918	0.000254864	0.000424773	0.000169909	0.000594682	0.000212386	0.00267607	8.49545e-05	0	0.000254864	0.000382295	0.00216634	8.49545e-05	0.00182652	0.000297341	0.00382295	0.000127432	0.000127432	0.00237873	0.0024212	0.00938748	0.0238722
OTU_1749	0	0	0	0	0	0	0	0	0	0	0	4.24773e-05	0	0	0	0	0	0	0	0	0	0	0	0	8.49545e-05	4.24773e-05	0	0	0	0	0	0	0	0	0	0	0	0	0	0	0	0	0	0	0	0	4.24773e-05	4.24773e-05	0.000127432
OTU_175	0	0	0	0	0	0	0	0	0	0	0	0	0	0	0	0	0	0	0	0	0	0	0	0	0	0	0	0	0	0	0	0	0	0	0	0	0	0	0	0	0	0	0	0	0	0	0	0	0
OTU_1750	0	0	0	4.24773e-05	0	0	0	0	4.24773e-05	0	0	4.24773e-05	0	0	0	0	0	0	0	4.24773e-05	0	0	0	8.49545e-05	0	0	0	0	0	0	4.24773e-05	0	0	0	0	0	0	4.24773e-05	0	0	0	0	0	0	0	0	0	0	0
OTU_1751	0	0	0	0	0	0	0	0	0	0	0	0	0	0	0	0	0	0	0	0	0	0	0	0	0	0	0	0	0	0	0	0	0	0	0	0	0	0	0	0	0	0	0	0	0	0	0	0	0
OTU_1753	0	0	0	0	0	0	0	0	0	0	0	0	0	0	0	0	0	0	0	0	0	0	0	0	0	0	0	0	0	0	0	0	0	0	0	0	0	0	0	0	0	0	0	0	0	0	0	0	0
OTU_1754	0	0	0	0	0	0	0	0	0	0	0	0	0	0	0	0	0	0	0	0	0	0	0	0	0	0	0	0	0	0	0	0	0	0	0	0	0	0	0	0	0	0	0	0	0	0	0	0	0
OTU_1755	0	0	0	0	0	0	0	0	0	0	0	0	0	0	0	0	0	0	0	0	0	0	0	0	0	0	0	0	0	0	0	0	0	0	0	0	0	0	0	0	0	0	0	0	0	0	0	0	0
OTU_1756	0	0	0	0	0	0	0	0	0	0	0	0	0	0	0	0	0	0	0	0	0	0	0	0	0	0	0	0	0	0	0	0	0	0	0	0	0	0	0	0	0	0	0	0	0	0	0	0	0
OTU_1757	0	0	0	0	0	0	0	0	0	0	0	0	0	0	0	0	0	0	0	0	0	0	0	0	0	0	0	0	0	0	0	0	0	0	0	0	0	0	0	0	0	0	0	0	0	0	0	0	0
OTU_1758	0	0	0	0	0	0	0	0	0	0	0	0	0	0	0	0	0	0	0	0	0	0	0	0	0	0	0	0	0	4.24773e-05	0	0	0	0	0	0	0	0	0	0	0	0	0	0	0	0	0	0	0
OTU_1759	0	0	0	0	0	0	0	0	0	0	0	0	0	0	0	0	0	0	0	0	0	0	0	0	0	0	0	0	0	0	0	0	0	0	0	0	0	0	0	0	0	0	0	0	0	0	0	0	0
OTU_176	0	0	0	0	0	0	0	0	0	0	0	0	0	0	0	0	0	0	0	0	0	0	0	0	0	0	0	0	0	0	0	0	0	0	0	0	0	0	0	0	0	0	0	0	0	0	0	0	0
OTU_1760	0	0	0	0	0	0	0	0	0	0	0	0	0	0	0	0	0	0	0	0	0	0	0	0	0	0	0	0	0	0	0	0	0	0	0	0	0	0	0	0	0	0	0	0	4.24773e-05	0	0	0	0
OTU_1761	0	0	0	0	0	0	0	0	0	0	0	0	0	0	0	0	0	0	0	0	0	0	0	0	0	0	0	0	0	0	0	0	0	0	0	0	0	0	0	0	0	0	0	0	0	0	0	0	0
OTU_1762	0	0	0	0	0	0	0	0	0	0	0	0	0	0	0	0	0	0	0	0	0	0	0	0	0	0	0	4.24773e-05	0	0	0	0	0	0	0	0	0	0	0	0	0	0	0	0	0	4.24773e-05	0	0	0
OTU_1763	0	0	0	0	0	0	0	0	0	0	0	0	0	0	0	0	0	0	0	0	0	0	4.24773e-05	0	0	0	0	0	0	0	0	4.24773e-05	0	0	0	0	0	0	0	0	0	0	0	0	0	0	0	0	0
OTU_1764	0	0	0	0	8.49545e-05	0	0	0	0	0	0	0	0	0	0	0	0	0	0	0	0	0	0	0	0	0	0	0	0	0	0	0	0	0	0	0	0	0	0	0	0	0	0	0	0	0	0	0	0
OTU_1765	0	0	0	0	0	0	0	0	0	0	0	0	0	0	0	0	0	0	0	0	0	0	0	0	0	0	0	0	0	0	0	0	0	0	0	0	0	0	0	0	0	0	0	0	0	0	0	0	0
OTU_1766	0	0	0	0	0	0	0	0	0	0	0	0	0	0	0	0	0	0	0	0	0	0	0	0	0	0	0	0	0	0	0	0	0	0	0	0	0	0	0	0	0	0	0	0	0	0	0	0	0
OTU_1768	0	0	0	0	0	0	0	0	0	0	0	0	0	0	0	0	0	0	0	0	0	0	0	0	0	0	0	0	0	0	0	0	0	0	0	0	0	0	0	0	0	0	0	0	0	0	0	0	0
OTU_177	0	0	0	0	0	0	0	0	0	0	0	0	0	0	0	0	0	0	0	0.000212386	0	0	0	0	0	0	0	0	0	0	0	0	0	0	0	0	0	0	0	0	0	0	0	0	0	0	0	0	0
OTU_1770	0	0	0	0	0	0	0	0	0	0	0	0	0	0	0	0	0	0	0	0	0	0	0	0	0	0	0	0	0	0	0	0	0	0	0	0	0	0	0	0	0	0	0	0	0	0	0	0	0
OTU_1771	0	0	0	0	0	0	0	0	0	0	0	0	0	0	0	0	0	0	0	0	0	0	0	0	0	0	0	0	0	0	0	0	0	0	0	0	0	0	0	0	0	0	0	0	0	0	0	0	0
OTU_1772	0	0	0	0	0	0	0	0	0	0	0	0	0	0	0	0	0	0	0	0	0	0	0	0	0	0	0	0	0	0	0	0	0	0	0	0	0	0	0	0	0	0	0	0	0	0	0	0	0
OTU_1775	0	0	0	0	0	0	0	0	0	0	0	0	0	0	0	0	0	0	0	0	0	0	0	0	0	0	0	0	0	0	0	0	0	0	0	0	0	0	0	0	0	0	4.24773e-05	0	0	0	0	0	0
OTU_1776	0	0	0	0	0	0	0	0	0	0	0	0	0	0	0	0	0	0	0	0	0	0	0	0	0	0	0	0	0	0	0	0	0	0	0	0	0	0	0	0	0	0	0	0	0	0	0	0	0
OTU_1777	0	0	0	0	0	0	0	0	0	0	0	0	0	0	0	0	0	0	0	0	0	0	0	0	0	0	0	0	0	0	0	0	0	0	0	0	0	0	0	0	0	0	0	0	0	0	0	0	0
OTU_1779	0	0	0	0	0	0	0	0	0	0	0	0	0	0	0	0	0	0	0	0	0	0	0	0	0	0	0	0	0	0	0	0	0	0	0	0	0	0	0	0	0	0	0	0	0	0	0	0	0
OTU_178	0	0	0	0	0	0	0	0	0	0	0	0	0	0	0	0	0	0	0	0	0	0	0	0	0	0	0	0	0	0	0	0	0	0	0	0	0	0	0	0	0	0	0	0	0	0	0	0	0
OTU_1780	0	0	0	0	0	0	0	0	0	0	0	0	0	0	0	0	0	0	0	0	0	0	0	0	0	0	0	0	0	0	0	0	0	0	0	0	0	0	0	0	0	0	0	4.24773e-05	0	0	0	0	0
OTU_1781	0	0	0	0	0	0	0	0	0	0	0	0	0	0	0	0	0	0	0	0	0	0	0	0	0	0	0	0	0	0	0	0	0	0	0	0	0	0	0	0	0	0	0	0	0	0	0	4.24773e-05	0
OTU_1782	0	0	0	0	0	0	0	0	0	0	0	0	0	0	0	0	0	0	0	0	0	0	0	0	0	0	0	0	0	0	0	0	0	0	0	0	0	0	0	0	0	0	0	0	0	0	0	0	0
OTU_1783	0.000127432	0	0.0014867	0.000509727	0	8.49545e-05	0.00144423	8.49545e-05	0	0	0.000127432	0	0	0.000127432	0.00165661	0.000127432	0	0	0	0	0	4.24773e-05	0	0	0	0.00123184	0	8.49545e-05	0	8.49545e-05	4.24773e-05	0	8.49545e-05	0.000722114	0	0	0	4.24773e-05	0	4.24773e-05	0	4.24773e-05	0	0	0	0	0	0	4.24773e-05
OTU_1784	0	0	0	0	0	0	0	0	0	0	0	0	0	0	0	0	0	0	0	0	0	0	0	0	0	0	0	0	0	0	0	0	0	0	0	0	0	0	0	0	0	0	0	0	0	0	0	0	0
OTU_1785	0	0	0	0	0	0	0	0	0	0	0	0	0	0	0	0	4.24773e-05	0	0	4.24773e-05	0	0	0	0	0	0	0	0	0	0	0	0	0	0	0	0	0	0	0	0	0	0	0	0	0	0	0	0	0
OTU_1786	0	0	0	0	0	0	0	0	0	0	0	0	0	0	0	0	0	0	0	0	0	0	0	0	0	0	0	0	0	0	0	0	0	0	0	0	4.24773e-05	0	0	0	0	0	0	0	0	0	0	0	0
OTU_1787	0	0	0	0	0	0	0	0	0	0	0	0	0	0	0	0	0	0	0	0	0	0	0	0	0	0	0	0	0.000637159	0	0	0	0	0	0	4.24773e-05	0	0	0	0	0	0	0	0	0	0	0	0	0
OTU_1788	0	0	0	0	0	0	0	0	0	0	0	0	0	0	0	0	0	0	0	0	0	0	0	0	0	0	0	0	0	0	0	0	0	0	0	0	0	0	0	0	0	0	0	0	0	0	0	0	0
OTU_1789	0	0	0	0	0	0	0	0	0	0	0	0	0	0	0	0	0	0	0	0	0	0	0	0	0	0	0	0	0	0	0	0	0	0	0	0	0	0	0	0	0	0	0	0	0.000552205	0	0	0	0
OTU_179	0	0	0	0	0	0	0	0	0	0	0	0	0	0	0	0	0	0	0	0	0	0	0	0	0	0	0	0	0	0	0	0	0	0	0	0	0	0	0	0	0	0	0	0	0	0	0	0	0
OTU_1790	0	0	0.00046725	0.000722114	0	0.000127432	0.00046725	0.00110441	0.000424773	0.00110441	0	0.000722114	0.000552205	4.24773e-05	0.000212386	0	0	0.000339818	0	0	4.24773e-05	0.000509727	0	0.00046725	0.000382295	0.000382295	0	8.49545e-05	0	0	0.000892023	0	4.24773e-05	0.000169909	0	0	0	0.000679636	0.000254864	0	0.000382295	4.24773e-05	0.000637159	0	0	0	0	0.00237873	0.145272
OTU_1791	0	0	0	0	0	0	0	0	0	0	0	0	0	0	0	0	0	0	0	0	0	0	0	0	0	0	0	0	0	0	0	0	0	0	0	0	0	0	0	0	0	0	0.000127432	0	8.49545e-05	0	0	0	0
OTU_1792	0	0	0	0	0	0	0	0	0	0	0	0	0	0	0	0	0	0	0	4.24773e-05	0	0	0	0	0	0	0	0	0	0	0	0	0	0	0	0	0	0	0	0	0	0	0	0	0	0	0	0	0
OTU_1793	0	0	0	0	0	0	0	0	0	0	0	0	0	0	0	0	0	0	0	0	0	0	0	0	0	0	0	0	0	0	0	0	0	0	0	0	0	0	0	0	0	0	8.49545e-05	0.000254864	0.000169909	0	0	0	0
OTU_1794	4.24773e-05	0.00140175	0	4.24773e-05	0	0	0.00169909	8.49545e-05	0	0.00114689	0.00110441	0.145145	0.000764591	4.24773e-05	4.24773e-05	0	0	0	0	0	0	8.49545e-05	0	0.000722114	0	0	0	0.000679636	0	0	0	4.24773e-05	0	4.24773e-05	0	0	0	0	0.000764591	4.24773e-05	0.000764591	0	0	0	0	0	0	0	0
OTU_1795	0	0	0	0	0	0	0	0	0	0	0	0	0	0	0	0	0	0	0	0	0	0	0	0	0	0	0	0	0	0	0	0	0	0	0	0	0	0	0	0	0	0	0	4.24773e-05	0	0	0	0	0
OTU_1796	0	0	0	0	0	0	0	0	0	0	0	0	0	0	0	0	0	0	0	0	0	0	0	0	0	0	0	0	0	0	0	0	0	0	0	0	0	0	0	0	0	0	0	0	0	0	0	0	4.24773e-05
OTU_1797	0	0	0	0	0	0	4.24773e-05	0	0	8.49545e-05	0.000212386	4.24773e-05	4.24773e-05	0	4.24773e-05	0	0	0	0	0	0	0	0	0	0	0	0	0	0	0	0	0	0	0	0	0	0	0	0	0	0	4.24773e-05	0	0	0	0	0	0	0
OTU_1798	0	0	0	0	0	0	0	0	0	0	0	0	0	0	0	0	0	0	0	0	0	0	0	0	0	0	0	0	0	0	0	0	0	0	0	0	0	0	0	0	0	0	0	0	0	0	0	0	0
OTU_1799	0	0	0	0	0	0	0	0	0	0	0	0	0	0	0	0	0	0	0	0	0	0	0	0	0	0	0	0	0	0	0	0	0	0	0	0	0	0	0	0	0	0	0	0	0	0	0	0	0
OTU_18	0.00637159	0.499235	0.00773086	0.00454507	0.0028035	0.00930252	0.0185201	0.0113414	0.0173732	0.025274	0.0268881	0.0274403	0.0163962	0.00760343	0.012106	0.135375	0.133676	0.0835103	0.0912837	0.0917509	0.117025	0.75737	0.737363	0.815606	0.0947243	0.146377	0.129726	0.0845723	0.031688	0.0189873	0.0253589	0.028927	0.0259111	0.427406	0.357574	0.354643	0.404129	0.595022	0.340838	0.653385	0.489211	0.496177	0.0183077	0.0268456	0.017713	0.0870359	0.101223	0.0839776	0.0100671
OTU_180	0	0	0	0	0	0	0	0	0	0	0	0	0	0	0	0	0	0	0	0	0	0	0	0	0	0	0	0	0	0	0	0	0	0	0	0	0	0	0	0	0	0	0	0	0	0	0	0	0
OTU_1800	0	0.000254864	0.000169909	0.00590434	4.24773e-05	0.00208139	0.00233625	0.0024212	0.192677	0	0.000254864	8.49545e-05	0.00178405	0.0009345	0.00165661	0.000552205	0.000552205	0.00433268	0.00276102	0.00301589	0.0024212	8.49545e-05	0.000339818	0	4.24773e-05	0.000254864	0	0.00199643	0.000127432	0.00284598	0.000339818	0.000297341	4.24773e-05	0.000127432	0.000169909	0.000127432	0.000212386	8.49545e-05	0.000722114	4.24773e-05	4.24773e-05	0.000127432	8.49545e-05	4.24773e-05	0.000169909	0.000127432	0.000212386	0.000297341	0.000127432
OTU_1801	0	0	0	0	0	0	0	0	0	0	0	0	0	0	0	0	0	0	0	0	0	0	0	0	0	0	0	0	0	0	0	0	0	0	0	0	0	0	0	0	0	0	0	0	0	0	0	0	0
OTU_1802	0	0	0	0	0	0	0	0	0	0	0	0	0	0	0	0	0	0	0	0	0	0	0	0	0	0	0	0	0	0	0	0	0	0	0	0	0	0	0	0	0	0	0	0	0	0	0	0	0
OTU_1803	0	0	0	0	0	0	0	0	0	0	0	0	0	0	0	0	0	4.24773e-05	0	0	4.24773e-05	0	0	0	0	0	0	0	4.24773e-05	0	0	0	0	0	0	8.49545e-05	0	0	0	0	0	0	0	0	0	0	4.24773e-05	8.49545e-05	0
OTU_1804	0	0	0	0	0	0	0	0	0	0	0	0	0	0	0	0	0	0	0	0	0	0	0	0	0	0	0	0	0	0	0	0	0	0	0	0	0	0	0	0	0	0	0	8.49545e-05	4.24773e-05	0	0	0	0
OTU_1805	0	0	0	0	0	0	0	0	0	0	0	0	0	0	0	0	0	0	0	0	0	0	0	0	0	0	0	0	0	0	0	0	0	0	0	0	0	0	0	0	0	0	0	0	0	0	0	0	0
OTU_1806	0	0	0	0	0	0	0	0	0	0	0	0	0	0	0	0	0	0	0	0	0	0	0	0	0	0	0	0	0	0	0	0	0	0	0	4.24773e-05	0	0	0	0	0	0	0	0	0	0	0.000127432	0	0
OTU_1807	0	0	0	0	0	0	0	0	0	0	0	0	0	0	0	0	0	0	0	0	0	0	0	0	4.24773e-05	0	0	0	0	0	0	0	0	0	0	0	0	0	0	0	0	0	0.000127432	0	0	0	0	0	0
OTU_1808	0	0	0	0	0	0	0	0	0	0	0	0	0	0	0	0	0	0	0	0	0	0	0	0	0	0	0	0	0	0	0	0	0	0	0	0	0	0	0	0	0	0	0	0	0	0	0	0	0
OTU_1809	0	0	0	8.49545e-05	4.24773e-05	0	0	0	4.24773e-05	0	0	0	0	0	0	0	0	0	0	0	0	0	0	0	0	0	0	0	0	0	0	0	0	0	0	0	0	0	0	0	0	0	0	0	0	0	0	0	0
OTU_181	0	0	0	0	0	0	0	0	0	0	0	0	0	0	0	0	0	0	0	0	0	0	0	0	0	0	0	0	0	0	0	0	0	0	0	0	0	0	0	0	0	0	0	0	0	0	0	0	0
OTU_1810	0	0	0	0	0	0	0	0	0	0	0	0	0	0	0	0	0	0	0	0	0	0	0	0	0	0	0	0	0	0	0	0	0	0	0	0	0	0	0	0	0	0	0	0	0	0	0	0	0
OTU_1811	0	0	4.24773e-05	0	0	0	0	0	0	0	0	0	0	0	0	0	0	0	0	0	0	0	0	0	0	0	0	0	0	0	0	0	0	0	0	0	0	0	0	0	0	0	0	0	0	0	0	0	0
OTU_1812	0	0	0	0	0	0	0	0	0	0	0	0	0	0	0	0	0	0	0	0	0	0	0	0	0	0	0	0	0	0	0	0	0	0	0	0	0	0	0	0	0	0	0	0	0	0	0	0	0
OTU_1813	0	0	0	0	0	0	0	0	0	0	0	0	0	0	0	0	0	0	0	0	0	0	0	0	4.24773e-05	4.24773e-05	0	0	0	0	0	0	0	0	0	0	0	0	0	0	0	0	0.00118936	4.24773e-05	0.000594682	0	0	0	0.000127432
OTU_1814	0	0	0	0	0	0	0	0	0	0	0	0	0	0	0	0	0	0	0	0	0	0	0	0	0	0	0	0	0	0	0	0	0	0	0	0	0	0	0	0	0	0	0	0	0	0	0	0	0
OTU_1815	0	0	0	0	0	0	0	0	0	0	0	0	0	0	0	0	4.24773e-05	0	0	0.000127432	4.24773e-05	0	0	0	0	0	0	4.24773e-05	0	0	0	0	0	0	0	4.24773e-05	0	0	0	0	0	0	0	0	0	4.24773e-05	0	0	0
OTU_1816	0	0	0	0	0	0	0	0	0	0	0	0	0	0	0	0	0	0	0	0	0	0	0	0	0	0	0	0	0	0	0	0	0	0	0	0	0	0	0	0	0	0	0	0	0	0	0	0	0
OTU_1817	0	0	0	0	0	0	0	0	0	0	0	0	0	0	0	0	0	0	0	0	0	0	0	0	0	0	0	0	0	0	0	0	0	0	0	0	0	0	0	0	0	0	0	4.24773e-05	0	4.24773e-05	0	8.49545e-05	0
OTU_1818	0	0	0	0	0	0	0	0	0	0	0	0	0	0	0	0	0	0	0	0	0	0	0	0	0	0	0	0	0	0	0	0	0	0	0	0	0	0	0	0	0	0	0	4.24773e-05	4.24773e-05	0	0	0	0
OTU_1819	0	0	0	0	0	0	0	0	0	0	0	0	0	0	0	0	0	0	0	0	0	0	0	0	0	0	0	0	0	0	0	0	0	0	0	0	0	0	0	0	0	0	0	0	0	0	0	0	0
OTU_182	0	0	0	0	0	0	0	0	0	0	0	0	0	0	0	0	0	0	0	0.000127432	0	0	0	0	0	0	0	0	0	0	0	0	0	0	0	0	0	0	0	0	0	0	0	0	0	0	0	0	0
OTU_1820	0	0	4.24773e-05	4.24773e-05	0	8.49545e-05	0	0	0	0	0	0	0	0	0	0	0.000127432	0	0	0.000339818	0	0	0	0	8.49545e-05	0	4.24773e-05	0	4.24773e-05	4.24773e-05	0	0	0	0	0	0.000169909	0	0	0	0	0	0	0.000297341	0.000127432	0.000127432	0.000297341	4.24773e-05	4.24773e-05	0.000127432
OTU_1821	0	0	0	0	0	0	0	0	0	0	0	0	0	0	0	0	0	0	0	0	0	0	0	0	0	0	0	0	0	0	0	0	0	0	0	0	0	0	0	0	0	0	0	0	0	0	0	0	0
OTU_1822	0	0	0	0	0	0	0	0	0	0	0	0	0	0	0	0	0	0	0	0	0	0	0	0	0	0	0	0	0	0	0	0	0	0	0	0	0	0	0	0	0	0	0	0	0	0	0	0	0
OTU_1823	0	0	0	0	0	0	0	0	0	0	0	0	0	0	0	0	0	0	0	0	0	0	0	0	0	0	0	0	0	0	0	0	0	0	0	0	0	0	0	0	0	0	0	0	0	0	0	0	0
OTU_1824	0	0	0	0	0	0	4.24773e-05	0	0	0	0	0	0	0	0	0.000297341	0	8.49545e-05	0.00314332	0.00220882	0.00144423	4.24773e-05	0.000127432	4.24773e-05	0.000127432	0	0.000127432	0.000382295	0.000382295	0.000764591	0.000212386	8.49545e-05	0.000382295	4.24773e-05	0.000382295	4.24773e-05	0.00046725	0.000127432	0.000127432	0.000127432	0	4.24773e-05	0	0	0	0.00118936	0.00110441	0.000552205	0
OTU_1825	0	0	0	0	0	0	0	0	0	0	0	0	0	0	0	0	0	0	0	0	0	0	0	0	0	0	0	0	0	0	0	0	0	0	0	0	0	0	0	0	0	0	0	0	0	0	0	0	0
OTU_1826	0	0	0	0	0	0	0	0	0	0	0	0	0	0	0	0	0	0	0	0	0	0	0	0	0	0	0	0	0	0	0	0	0	0	0	0	0	0	0	0	0	0	0	0	0	0	0	0	0
OTU_1827	0	0	0	0	0	0	0	0	0	0	0	0	0	0	0	0	0	0	0	0	0	0	0	0	0	0	0	0	0	0	0	0	0	0	0	0	0	0	0	0	0	0	0	0	0	0	0	8.49545e-05	0
OTU_1828	0	0	0	0	0	0	0	0	0	0	0	0	0	0	0	0	0	0	0	0	0	0	0	0	0	0	0	0	0	0	0	0	0	0	0	0	0	0	0	0	0	0	0	0	0	0	0	0	0
OTU_1829	0	0	0	0	0	0	0	0	0	0	0	0	0	0	0	0	4.24773e-05	0	0	0.000127432	0	0	0	0	8.49545e-05	0	0	0	4.24773e-05	0	0	0	0	0	0	4.24773e-05	0	0	0	0	0	0	0	0	0	0	4.24773e-05	8.49545e-05	0
OTU_183	0	0	0	0	0	0	0	0	0	0	0	0	0	0	0	0	0	0	0	0	0	0	0	0	0	0	0	0	0	4.24773e-05	0	0	0	0	0	0	0	0	0	0	0	0	0	0	0	0	0	0	0
OTU_1831	0	0	0	0	0	0	0	0	0	0	0	0	0	0	0	0	0	0	0	0	0	0	0	0	0	0	0	0	0	0	0	0	0	0	0	0	0	0	0	0	0	0	0	0	0	0	0	0	0
OTU_1834	0	0.000509727	0	4.24773e-05	0	0.000127432	0.0124034	0.0009345	0.000127432	0.000169909	0.00046725	0.000552205	0.000297341	0	4.24773e-05	0.000339818	0	0	0.000679636	0.00127432	0.0014867	0.000722114	0.000509727	0.000509727	0.00174157	0.00106193	0.0014867	0.000722114	0.000552205	0.00348314	0.00114689	0.00768839	0.000509727	0.000339818	0.00658398	0.000254864	0.00352561	0.00212386	0.0022513	0.0009345	0.00182652	0.00135927	0.000169909	0.000679636	0.000169909	0.00777334	0.00764591	0.00509727	0.000169909
OTU_1835	0	0	0	0	0	0	0	0	0	4.24773e-05	0	0	0	0	0	0	0	0	0	0	0	0	8.49545e-05	0	8.49545e-05	4.24773e-05	4.24773e-05	0	4.24773e-05	0	0	0	0	0	0	0	0	0	0	0	0	0	0	0	0	0	0	0	0
OTU_1836	0	0	0	0	0	0	0	0	0	0	0	0	0	0	0	0	0	0	0	0	0	0	0	0	0	0	0	0	0	0	0	0	0	0	0	0	0	0	0	0	0	0	0	0	0	0	0	0	0
OTU_1837	0	0.000169909	0	0.000127432	0	4.24773e-05	0	8.49545e-05	8.49545e-05	0	0.000127432	0.000169909	0.000254864	0	0	4.24773e-05	8.49545e-05	0	0.000637159	0.000807068	0.000976977	0.000509727	0.000424773	0.000382295	0.00114689	0.000722114	0.00046725	8.49545e-05	4.24773e-05	8.49545e-05	0.000637159	0.000382295	8.49545e-05	0.000212386	4.24773e-05	0.000722114	0.00127432	0.00441764	0.00254864	0.0098972	0.00743352	0.00509727	0.000339818	0.000169909	0	0.000254864	0.000764591	0.000127432	0.000127432
OTU_1838	0	0	0	0	0	0	0	0	0	0	0	0	0	0	0	0	0	0	0	0	0	0	0	0	0	0	0	0	0	0	0	0	0	0	0	0	0	0	0	0	0	0	0	0	0	0	0	0	0
OTU_184	0	0	0	0	0	0	0	0	0	0	0	0	0	0	0	0	0	0	0	0	0	0	0	0	0	0	0	0	0	0	0	0	0	0	0	0	0	0	0	0	0	0	0	0	0	0	0	0	0
OTU_1840	0	0	0	0	0	0	0	0	0	0	0	0	0	0	0	0	0	0	0	0	0	0	0	0	0	0	0	0	0	0	0	0	0	0	0	0	0	0	0	0	0	0	0	0	0	0	0	0	0
OTU_1841	0	0	0	0	0	0	0	0	0	0	0	0	0	0	0	0	0	0	0	0	0	0	0	0	0	0	0	0	0	0	0	0	0	0	0	0	0	0	0	0	0	0	0	0	0	0	0	4.24773e-05	0
OTU_1842	0	0	0	0	0	0	0	0	0	0	0	0	0	0	0	0	0	0	0	0	0	0	0	0	0	0	0	0	0	0	0	0	0	0	0	0	0	0	0	0	0	0	0	0	0	0	0	0	0
OTU_1843	0	0	0	0	0	0	0	0	0	0	0	0	0	0	0	0	0	0	0	0	0	0	0	0	0	0	0	0	0	0	0	0	0	0	0	0	0	0	0	0	0	0	4.24773e-05	0	0	0	0	0	0
OTU_1844	0	0	0	0	0	0	0	0	0	0	0	0	0	0	0	0	0	0	0	0	0	0	0	0	0	0	0	0	0	0	0	0	0	0	0	0	0	0	0	0	0	0	0	0	0	0	0	0	0
OTU_1846	0	0	0	0	0	0	0	0	0	0	0	0	0	0	0	0	0	0	8.49545e-05	0.000169909	4.24773e-05	0	0	0	0	0	0	4.24773e-05	4.24773e-05	8.49545e-05	0	0	0	0	4.24773e-05	0	4.24773e-05	0	0	0	0	0	0	0	0	4.24773e-05	4.24773e-05	4.24773e-05	0
OTU_1847	0	0	0	4.24773e-05	0	0	0	0	0	0	0	4.24773e-05	0	0	0	0	4.24773e-05	0	0	0	0	4.24773e-05	0	0	0	0	0	0.000297341	8.49545e-05	0	0	0	0	0	0	0	0	0	0	0	8.49545e-05	8.49545e-05	4.24773e-05	0	0	4.24773e-05	0.000127432	0	0
OTU_1848	0	0	0	0	0	0	0	0	0	0	0	0	0	0	0	0	0	0	0	0	0	0	0	0	0	0	0	0	0	0	0	0	0	0	0	0	0	0	0	0	0	0	0	0	0	0	0	0	0
OTU_1849	0	0	0	0	0	0	0	0	0	0	0	0	0	0	0	0	0	0	0	0	0	0	0	0	0	0	0	0	0	0	0	0	0	0	0	0	0	0	0	0	0	0	0	0	0	0	4.24773e-05	4.24773e-05	0
OTU_185	0	0	0	0	0	0	0	0	0	0	0	0	0	0	0	0	0	0	0	0	0	0	0	0	0	0	0	0	0	0	0	0	0	0	0	0	0	0	0	0	0	0	0	0	0	0	0	0	0
OTU_1850	0	0	0	0	0	0	0	0	0	0	0	0	0	0	0	0	0	0	0	0	0	0	0	0	0	0	0	0	0	0	0	0	0	0	0	0	0	0	0	0	0	0	0	0	0	0	0	0	0
OTU_1851	0	0	0	0	0	0	0	0	0	0	0	0	0	0	0	0	0	0	0	0	0	0	0	0	0	0	0	0	0	0	0	0	0	0	0	0	0	0	0	0	0	0	0	0.00730609	0	4.24773e-05	4.24773e-05	0	0
OTU_1852	0	0	0	0	0	0	0	0	0	0	0	0	0	0	0	0	0	0	0	0	0	0	0	0	0	0	0	0	0	0	0	0	0	0	0	0	0	0	0	0	0	0	0.00233625	4.24773e-05	0	4.24773e-05	0	0	0
OTU_1853	0	0	0	0	0	0	0	0	0	0	0	0	0	0	0	0	0	0	0	0	0	0	0	0	0	0	0	0	0	0	0	0	0	0	0	0	0	0	0	0	0	0	0.000127432	0	0	0.000382295	0.000212386	0.000254864	0
OTU_1854	0	0	0	0	0	0	0	0	0	0	0	0	0	0	0	0	0	0	0	0	0	0	0	0	0	0	0	0	0	0	0	0	0	0	0	0	0	0	0	0	0	0	0	0	0	0	0	0	0
OTU_1855	0	0	0	0	0	0	0	0	0	8.49545e-05	0	0	0	0	0	0	0	0	0	0	0	0	0	0	0	0	0	0	0	0	0	0	0	0	0	0	0	0	0	0	0	0	0	0	0	0	0	0	0
OTU_1856	0.00157166	0.00216634	0.00195395	0.00127432	0.000212386	0.00378048	0.0281624	0.0169484	0.00794325	0.0042902	0.00403534	0.00463002	0.00395039	0.00127432	0.00161414	0.014867	0.003738	0.033642	0.0141449	0.00446011	0.021451	0.109634	0.141832	0.0694928	0.0623142	0.05144	0.0588735	0.355025	0.28447	0.245986	0.0625265	0.130405	0.0843174	0.0143573	0.010237	0.00883527	0.028927	0.100204	0.0347889	0.0183927	0.0220457	0.0165661	0.00182652	0.00127432	0.00327075	0.0128281	0.0189873	0.0142299	0.0505055
OTU_1857	0	0	0	0	0	0	0	0	0	0	0	0	0	0	0	0	0	0	0	0	0	0	0	0	0	0	0	0	0	0	0	0	0	0	0	0	0	0	0	0	0	0	0	0	0	0	0	0	0
OTU_1858	0	0	0	0	0	0	0	0	0	0	0	0	0	0	0	0	0	0	0	0	0	0	0	0	0	0	0	0	0	0	0	0	0	0	0	0	0	0	0	0	0	0	0	0	0	0	0	0	0
OTU_1859	4.24773e-05	0	0	4.24773e-05	0	0	0	0	0	8.49545e-05	0.000127432	0	0	0	4.24773e-05	0	0	0	0	0	0	0	0	0	4.24773e-05	0	0	0	0	0	0	0	0	4.24773e-05	0	0	0	0	0	0	0	0	0.000976977	0.00195395	4.24773e-05	4.24773e-05	4.24773e-05	0	0.000722114
OTU_186	0	0	0	4.24773e-05	0	0	0	0	0	0	0	0	0	0	0	0	0	0	0	0	0	0	0	0	0	0	0	0	0	0	0	0	0	0	0	0	0	0	0	0	0	0	0	0	0	0	0	0	0
OTU_1860	0	0	0	0	0	0	0	4.24773e-05	0	0	0	0	0	0	0	0	0	0	0	0	0	0	0	0	0	0	0	0	0	0	0	0	0	0	0	0	0	0	0	0	0	0	0	0	0.000127432	0.000169909	0	0.000212386	0
OTU_1861	0	0	0	0	0	0	0	0	0	0	0	0	0	0	0	0	0	0	0	0	0	0	0	0	0	0	0	0	0	0	0	0	0	0	0	0	0	0	0	0	0	0	0	0	0	0	0	0	0
OTU_1862	0	0	0	0	0	0	0	0	0	0	0	0	0	0	0	0	0	0	0	0	0	0	0	0	0	0	0	0	0	0	0	0	0	0	0	0	0	0	0	0	0	0	0	0	0	0	0	0	0
OTU_1863	0	0	0	0	0	0	0	0	0	0	0	4.24773e-05	0	0	0	0	0	0	0	0	0	0	0	0	0	0	0	0	0	0	4.24773e-05	0	0	0	0	0	0	0	0	0	0	0	0	0	0	0	0	0	0
OTU_1864	0	0	0	0	0	0	0	0	0	0	0	0	0	0	0	0	0	0	0	0	0	0	0	0	0	0	0	0	0	0	0	0	0	0	0	0	0	0	0	0	0	0	0	0.000339818	0	4.24773e-05	0	0	0
OTU_1865	0	0	0	0	0	0	0	0	0	0	0	0	0	0	0	0	0	0	0	0	4.24773e-05	0	0	0	0	0	0	0	0	0	0	0	0	0	0.000127432	8.49545e-05	0	0	0	0	0	0	0	0	0	0	0	0	0
OTU_1866	0	0	0	0	0.000127432	0	0	0	0	0	0	0	0	0	0	0	0	0	0	0	0	0	0	0	0	0	0	0	0	0	0	0	0	0	0	0	0	0	4.24773e-05	0	0	0	0	0	0	0	0	0	0
OTU_1867	0	0	0	0	0	0	0	0	0	0	0	0	0	0	0	0	0	0	0	0	0	0	0	0	0	0	0	0	0	0	0	0	0	0	0	0	0	0	0	0	0	0	0	0	0	0	0	0	0
OTU_1868	0	0	0	0	8.49545e-05	0	0	0	0	4.24773e-05	0	0	0	0	0	0	0	0	0	0	0	0	0	0	0	0	0	0	0	0	0	0	0	0	0	0	0	0	0	0	0	0	0	0	0	0	0	0	0
OTU_1869	0	0	0	0	0	0	0	0	0	0	0	0	0	0	0	0	0	0	0	0	0	0	0	0	0	0	0	0	0	0	0	0	0	0	0	0	0	0	0	0	0	0	0	0	0	0	0	0	0
OTU_187	0	0	0	0	0	0	0	0	0	0	0	0	0	0	0	0	0	0	0	0	0	0	0	0	0	0	0	0	0	0	0	0	0	0	0	0	0	0	0	0	0	0	0	0	0	0	0	0	0
OTU_1870	4.24773e-05	4.24773e-05	0	0	0	0	0	0	0	0	0	0	0	4.24773e-05	0	0	0	0	0	0	0	0	0	0	0	0	0	0	0	0	0	0	0	0	0	0	0	0	0	0	0	4.24773e-05	0	0	0	0	0	0	0
OTU_1871	0	0	0	0	0	0	0	0	0	0	0	0	0	0	0	0	0	0	0	0	0	0	0	0	0	0	0	0	0	0	0	0	0	0	0	0	0	0	0	0	0	0	0	0	0	0	0	0	0
OTU_1873	0	0	0	0	0	0	0	0	0	0	0	0	0	0	0	8.49545e-05	0	0	8.49545e-05	0	0	0	0	4.24773e-05	0	0	0	0	0	0	0	0	0	0	0	0	0	0	0	0	0	0	4.24773e-05	0	4.24773e-05	0	0	0	0
OTU_1874	0	0	0	0	0	0	0	0	0	0	8.49545e-05	0	0	0	0	0	0	0	0	0	0	0	0	0	0	0	0	0	0	0	0	0	0	0	0	0	0	0	0	0	0	0	0.000849545	0.000892023	0.00259111	0	4.24773e-05	0	0
OTU_1875	0	0	0	0	0	0	0	0	0	0	0	0	0	0	0	0	0	0	0	0	0	0	0	0	0	0	0	0	0	0	0	0	0	0	0	0	0	0	0	0	0	0	0	0	0	0	0	0	0
OTU_1876	0	0	0	0	0	0	0	0	0	0	0	0	0	0	0	0	0	0	0	0	0	0	0	0	0	0	0	0	0	0	0	0	0	0	0	0	0	0	0	0	0	0	0	0	0	0	0	0	0
OTU_1877	0	0	0	0	0	0	0	0	0	0	0	0	0	0	0	0	0	0	0	0	0	0	0	0	0	0	0	0	0	0	0	0	0	0	0	0	0	0	0	0	0	0	0	0	0	0	0	0	0
OTU_1878	0	0	0	0	0	0	0	0	0	0	0	0	0	0	0	0	0	0	0	0	0	0	0	0	0	0	0	0	0	0	0	0	0	0	0	0	0	0	0	0	0	0	0.000127432	0.000127432	0	0	0	0	0
OTU_1879	0	0	0	0	0	0	0	0	0	0	0	0	0	0	0	0	0	0	0	0	0	0	0	0	0	0	0	0	0	0	0	0	0	0	0	0	0	0	0	0	0	0	0	0	0	0	0	0	0
OTU_188	0	0	0	0	0	0	0	0	0	0	0	0	0	0	0	0	0	0	0	0	0	0	0	0	0	0	0	0	0	0	0	0	0	0	0	0	0	0	0	0	0	0	0	0	0	0	0	0	0
OTU_1880	0	0	0	0	0	0	0	0	0	0	0	0	0	0	0	0	0	0	0	0	0	0	0	0	0	0	0	0	0	0	0	0	0	0	0	0	0	0	0	0	0	0	0	4.24773e-05	0.000212386	0	0	4.24773e-05	0
OTU_1881	0	0	0	0	0	0	0	0	0	0	0	0	0	0	0	0	0	0	0	0	0	0	0	0	0	0	0	0	0	0	0	0	0	0	0	0	0	0	0	0	0	0	0	0	4.24773e-05	0	0	0	0
OTU_1884	0	0	0	0	0	4.24773e-05	0	0	0	0	0	0	0	0	0	4.24773e-05	0	4.24773e-05	0	0	0	8.49545e-05	8.49545e-05	0	0	0	4.24773e-05	0.000254864	0	0.000254864	0	0.000424773	8.49545e-05	0.000382295	0	0	8.49545e-05	4.24773e-05	0.000127432	0	0	0	0.000552205	0	0	0.000594682	0.0014867	0.000594682	0
OTU_1886	0	0	0	0	0	0	0	0	0	0	0	0	0	0	0	0	0	0	0	0	0	0	0	0	0	0	0	0	0	0	0	0	0	0	0	0	0	0	0	0	0	0	0	4.24773e-05	0	0	0	0	0
OTU_1887	0	0	0	0	0	0	0	0	0	0	0	0	0	0	0	0	0	0	0	0	0	0	0	0	0	0	0	0	0	0	0	0	0	0	0	0	0	0	0	0	0	0	0	0	0	0	0	0	0
OTU_1889	0	0	0	0	0	0	0	0	0	0	0	0	0	0	0	0	0	0	0	0	0	0	0	0	0	0	0	0	0	0	0	0	0	0	0	0	0	0	0	0	0	0	0	0	0	0	0	0	0
OTU_189	0	0	0	0	0	0	0	0	0	0	0	0	0	0	0	0	0	0	0	0	0	0	0	0	0	0	0	0	0	0	0	0	0	0	0	0	0	0	0	0	0	0	0	0	0	0	0	0	0
OTU_1890	0	0	0.000339818	0	0	4.24773e-05	0.000254864	0	0	0	0	4.24773e-05	4.24773e-05	0	0.000382295	0	0	0	0	0	0	0	4.24773e-05	0	0	0.000169909	0	0	0	4.24773e-05	4.24773e-05	4.24773e-05	0	0.000297341	0	0	0	0	0	0	0	0	0	0	0	0	0	0	0
OTU_1891	0	0	0	0	0	0	0	0	0	0	0	0	0	0	0	0	0	0	0	0	0	0	0	0	0	0	0	0	0	0	0	0	0	0	0	0	0	0	0	0	0	0	0	0	0	0	0	0	0
OTU_1892	0	0	0	0	0	0	0	0	0	0	0	0	0	0	0	0	0	0	0	0	0	0	0	0	0	0	0	0	0	0	0	0	0	0	0	0	0	0	0	0	0	0	0	0	0	0	0	0	0
OTU_1893	0	0	0	0	0	0	0	0	0	0	0	0	0	0	0	0	0	0	0	0	0	0	0	0	0	0	0	0	0	0	0	0	0	0	0	0	0	0	0	0	0	0	0	0	0	0	0	0	0
OTU_1895	0	0	0	0	0	0	0	0	0	0	0	0	0	0	0	0	0	0	0	0	0	0	0	0	0	0	0	0	0	0	0	0	0	0	0	0	0	0	0	0	0	0	0	0	0	0	0	0	0
OTU_1896	0	0	0	0	0	0	0	0	4.24773e-05	0	0	0	0	0	0	0	0	0	4.24773e-05	4.24773e-05	4.24773e-05	0	0	0	0	0	4.24773e-05	0	0	0	0	0	0	0	0	0	0	0	4.24773e-05	8.49545e-05	8.49545e-05	0	0	0	0	0	4.24773e-05	0	0
OTU_1898	0	0	0	0	0	0	0	0	0	0	0	0	0	0	0	0	0	0	0	0	0	0	0	0	0	0	0	0	0	0	0	0	0	0	0	0	0	0	0	0	0	0	0	0	0	0	0	0	0
OTU_19	0	0	4.24773e-05	0	0	0	0	0	0	0	0	0	0	0	0	0	0	0	0	0	0	0	0	0	0	0	0	0	0	0	0	0	0	0	0	0	0	0	0	0	0	0	0	0	0	0	0	0	0
OTU_190	0	0	0	0	0	0	0	0	0	0	0	0	0	0	0	0	0	0	0	0	0	0	0	0	0	0	0	0	0	0	0	0	0	0	0	0	0	0	0	0	0	0	0	0	0	0	0	0	0
OTU_1900	0	0	0	0	0	0	0	0	0	0	0	0	0	0	0	0	0	0	0	0	0	0	0	0	0	4.24773e-05	0	4.24773e-05	0	0	0	0	0	0	0	0	0	0	0	0	0	0	0	0	0	0	0	0	0.000169909
OTU_1902	0	0	0	0	0	0	0	0	0	0	0	0	0	0	0	0	0	0	0	0	0	0	0	0	0	0	0	0	0	0	0	0	0	0	0	0	0	0	0	0	0	0	8.49545e-05	0	0	0	0	0	0
OTU_1903	0	0	0	0	0	0	0	0	0	0	0	0	0	0	0	0	0	0	0	0	0	0	0	0	0	0	0	0	0	0	0	0	0	0	0	0	0	0	0	0	0	0	4.24773e-05	0	0	0	0	0	0
OTU_1904	0	0	0	0	0	0	0	0	0	0	0	0	0	0	0	0	0	0	0	0	0	0	0	0	0	0	0	0	0	0	0	0	0	0	0	0	0	0	0	0	0	0	0	0	0	0	0	0	0
OTU_1905	0	0	0	0	0	0	0	0	0	0	0	0	0	0	0	0	0	0	0	0	0	0	0	0	0	0	0	0	0	0	0	0	0	0	0	0	0	0	0	0	0	0	0	0	0	4.24773e-05	0	0	0
OTU_1906	0	0	0	0	0	0	8.49545e-05	0	0.000212386	0	0	0	0	0	0	0	0	0	0	0	0	0	0	0	0	0	0	0	0	0	0	0	0	0	0	0	0	0	0	0	0	0	0	0	0	0	0	0	0
OTU_1907	0	0	0	0	0	0	0	0	0	0	0	0	0	0	0	0	0	0	0	0	0	0	0	0	0	0	0	0	0	0	0	0	0	0	0	0	0	0	0	0	0	0	0	0	0	0	0	0	0
OTU_1908	0	0	0	0	0	0	0	0	0	0	0	0	0	0	0	0	0	0	0	0	0	0	0	0	0	0	0	0	0	0	0	0	0	0	0	0	0	0	0	0	0	0	0	0	0	0	0	0	0
OTU_1909	0	0	0	0	0	0	0	0	0	0	0	0	0	0	0	0	0	0	0	0	0	0	0	0	4.24773e-05	0	0	0	0	0	0	0	0	0	0	4.24773e-05	0	0	0	0	0	0	0.0158015	0.000127432	0	4.24773e-05	0.000127432	0	0
OTU_1910	0	0	0	0	0	0	0	0	0	0	0	0	0	0	0	0	0	0	0	0	4.24773e-05	0	0	0	0	0	4.24773e-05	0	8.49545e-05	0	0	0	0	0	0	0	0	0	0	0	0	0	0.000169909	0.00178405	0.000764591	0.00365305	0.00322827	0.00437516	4.24773e-05
OTU_1911	0	0	0	0	0	0	0	0	0	0	0	0	0	0	0	0	0	0	0	0	0	0	0	0	0	0	0	0	0	0	0	0	0	0	0	0	0	0	0	0	0	0	0.000297341	8.49545e-05	0.000212386	0.000594682	0.000382295	0.000169909	0
OTU_1912	0	0	8.49545e-05	4.24773e-05	0	0	0	0	0	0	0	0	0	0	0	0	0	0	0	0	4.24773e-05	0	0	4.24773e-05	4.24773e-05	4.24773e-05	0	0	0	0	0	0	0	0	0	4.24773e-05	0	0	0	0	0	0	0	0	0	0	0	0	8.49545e-05
OTU_1913	0	0	0	0	0	0	0	0	0	0	0	0	0	0	0	0	0	0	0	0	0	0	0	0	0	0	0	0	0	0	0	0	0	0	0	0	0	0	0	0	0	0	0	0	0	0	0	0	0
OTU_1914	0	0	0	0	0	0	0	0	0	0	0	0	0	0	0	0	0	0	0	0	0	0	0	0	0	0	0	0	0	0	0	0	0	0	0	0	0	0	0	0	0	0	0.000764591	0	0	0	0	0	0
OTU_1915	0	0	0	0	0	0	0	0	0	0	0	0	0	0	0	0	0	0	0	0	0	0	0	0	0	0	0	0	0	0	0	0	0	0	0	0	0	0	0	0	0	0	0	0	0	0	0	0	0
OTU_1916	0	0	0	0	0	0	0	0	0	0	0	0	0	0	0	0	0	0	0	4.24773e-05	0	0	0	0	4.24773e-05	0	0	0	0	0	0	0	0	0	0	0	0	0	0	0	0	0	0	0	0	0	0	0	0
OTU_1917	0	0	0	0	0	0	0	0	0	0	0	0	0	0	0	0	0	0	0	0	0	0	0	0	0	0	0	0	0	0	0	0	0	0	0	0	0	0	0	0	0	0	0	0	0.00046725	0	0	0	0
OTU_1918	0	0	0	0	0	8.49545e-05	0	0	0	0	0	0	0	0	0	0	0	0	0	0	0	0	0	0	0	0	0	0	4.24773e-05	4.24773e-05	0	0	0	0	0	8.49545e-05	0	0	0	0	0	0	4.24773e-05	0	0	0	0	0	0
OTU_1919	0	0	0	0	0	0	0	0	0	0	0	0	0	0	0	0	4.24773e-05	0	0	8.49545e-05	0.000254864	0	0	0	0.000127432	0	0	8.49545e-05	0	4.24773e-05	0	0	0	4.24773e-05	8.49545e-05	4.24773e-05	0	0.000169909	0.000212386	0.000127432	0.000212386	8.49545e-05	0	0	0	8.49545e-05	4.24773e-05	0	0
OTU_192	0	0	0	0	0	0	0	0	0	0	0	0	0	0	0	0	0	0	0	0	0	0	0	0	0	0	0	0	0	0	0	0	0	0	0	0	0	0	0	0	0	0	0	0	0	0	0	0	0
OTU_1920	0	0	0	0	0	0	0	0	0	0	0	0	0	0	0	0	0	0	0	0	0	0	0	0	0	0	0	0	0	0	0	0	0	0	0	0	0	0	0	0	0	0	0	0	0	4.24773e-05	0.000169909	0	0
OTU_1921	0.000297341	0	0.0013168	0.000892023	0.000127432	0.000764591	0	0	4.24773e-05	0	0	0	0	0	0	0.000254864	0.000552205	0.000849545	0.000807068	0.000849545	0.000127432	0	4.24773e-05	0	0.000722114	0	0.00123184	4.24773e-05	0.000297341	0.000169909	0	0	0	0	0.0009345	4.24773e-05	0.000764591	0	4.24773e-05	0	4.24773e-05	0	0.000127432	8.49545e-05	0	0.00152918	4.24773e-05	4.24773e-05	0
OTU_1922	0	0	0	0	0	0	0	0	0	0	0.000169909	0	0	0	0	0	0	0	0	0	0	0	4.24773e-05	0	0	0	0	0	0	0	0	4.24773e-05	0	0	0	0	0	0	0	8.49545e-05	0	0	0	0	0	0	0	0	0
OTU_1923	0	0	0	4.24773e-05	0	0	0	0	4.24773e-05	0	0	4.24773e-05	0	0	0	0	0	0	0	0	0	0	0	0	0	0	0	0	0	0	0	4.24773e-05	0	0	0	0	0	0	0	0	0	0	0	0	4.24773e-05	0	0	0	0
OTU_1924	0	0	0	0	0	0	0	0	0	0	0	0	0	0	0	0	0	0	0	0	0	0	0	0	0	0	0	0	0	0	0	0	0	0	0	0	0	0	0	0	0	0	0	0	0	0	0	0	0
OTU_1925	0	0	0	0	0	4.24773e-05	4.24773e-05	0	8.49545e-05	0	0	8.49545e-05	0	0	0	4.24773e-05	0	4.24773e-05	8.49545e-05	8.49545e-05	0.000127432	4.24773e-05	4.24773e-05	0	0.000127432	0	0.000127432	0	4.24773e-05	0.000212386	4.24773e-05	0.000212386	0	4.24773e-05	4.24773e-05	0	4.24773e-05	8.49545e-05	0.000127432	0.000297341	0.000382295	0.000339818	4.24773e-05	0	4.24773e-05	0	0	0.000127432	0
OTU_1926	0	0	0	0	0	0	0	0	0	0	0	0	0	0	0	0	0	0	0	0	0	0	0	0	0	0	0	0	0	0	0	0	0	0	0	0	0	0	0	0	0	0	0	0	0	0	0	0	0
OTU_1927	0	0	0	0	0	0	0	0	0	0	0	0	0	0	0	0	0	0	0	0	0	0	0	0	0	0	0	0	0	0	0	0	0	0	0	0	0	0	0	0	0	0	0.000127432	0	0	0	0	0	0
OTU_1928	0	0	0	0	0	0	0	0	0	0	0	0	0	0	0	0	0	0	0	0	0	0	0	0	0	0	0	0	0	0	0	0	0	0	0	0	0	0	0	0	0	0	0	0	0	0	0	0	0
OTU_1929	0	0	0	0	0	0	0	0	0	0	0	0	0	0	0	0	0	0	0	0	0	0	0	0	0	0	0	0	0	0	0	0	0	0	0	0	0	0	0	0	0	0	0	0	0	0	0	0	0
OTU_193	0	0	0	0	0	0	0	0	0	0	0	0	0	0	0	0	0	0	0	0.000169909	0	0	0	0	0	0	4.24773e-05	0	0	0	0	0	0	0	0	0	0	0	0	0	0	0	0	0	0	0	0	0	0
OTU_1930	0	0	0	4.24773e-05	0	0	0	0	0	0	0	0	0	0	0	0	0	0	0	0	0	0	0	0	0	8.49545e-05	0	0	0	0	0	0	0	0	0	0	0	0	0	0	0	0	0	0	0	0	0	0	8.49545e-05
OTU_1931	0	0	0	0	0	0	0	0	0	0	0	0	0	0	0	0	0	4.24773e-05	0	0	0	4.24773e-05	0	0	0	0	0	0	0	0	0	0	0	0	0	0	0	0	0	0	0	0	0	0	8.49545e-05	0	0	0	0
OTU_1932	0	0	0	0	0	0	0	0	0	0	0	0	0	0	0	0	0	0	0	0	0	0	0	0	0	0	0	0	0	0	0	0	0	0	0	0	0	0	0	0	0	0	0	0	0	0	0	0	0
OTU_1933	0	0	0	0	0	0	0	0	0	0	0	0	0	0	0	0	0	0	0	0	0	0	0	0	0	0	0	0	0	0	0	0	0	0	0	0.000169909	0	0	0	0	0	0	0	0	0	0	0	0	0
OTU_1934	0	0	0	0	0	0	0	0	0	0	0	0	0	0	0	0	0	0	0	0	0	0	0	0	0	0	0	0	0	0	0	0	0	0	0	0	0	0	0	0	0	0	0	0	0	0	0	0	0
OTU_1936	4.24773e-05	0	4.24773e-05	4.24773e-05	0	8.49545e-05	0	0	0	0	4.24773e-05	0	0	0	0	4.24773e-05	0	0	0	0.00046725	0	0	0	0	0	0	0	0	4.24773e-05	0	0	0	0	0	0	4.24773e-05	0	4.24773e-05	0	0	4.24773e-05	0	0	0.00046725	4.24773e-05	0	0	0	0
OTU_1938	0	0	0	0	0	0	0	0	0	0	0	0	0	0	0	0	0	0	0	0	0	0	0	0	0	0	0	0	0	0	0	0	0	0	0	0	0	0	0	0	0	0	0	0	0	0	0	0	0
OTU_1939	0	0	0	0	0	0	0	0	0	0	0	0	0	0	0	0	0	0	0	0	0	0	0	0	0	0	0	0	0	0	0	0	0	0	0	0	0	0	0	0	0	0	0	0	0	0	4.24773e-05	0	0
OTU_194	0	0	0	0	0	0	0	0	0	0	0	0	0	0	0	4.24773e-05	0	0	0	0	0	0	0	0	0	0	0	0	0	0	0	0	0	0	0	0	0	0	0	0	0	0	0	0	0	0	0	0	0
OTU_1940	0	0	8.49545e-05	0	0	0	4.24773e-05	0	0	4.24773e-05	0	4.24773e-05	8.49545e-05	0	4.24773e-05	0	0	0	0	8.49545e-05	4.24773e-05	0	0	0	0.000169909	0.000127432	8.49545e-05	0.000976977	0.000254864	8.49545e-05	8.49545e-05	4.24773e-05	0.000212386	0.000127432	0	4.24773e-05	8.49545e-05	0.000169909	0.000127432	0	4.24773e-05	0.000169909	8.49545e-05	0	0	4.24773e-05	8.49545e-05	0.000169909	0.000169909
OTU_1941	0	0	0	0	0	0	0	0	0	0	0	0	0	0	0	0	0	0	0	0	0	0	0	0	0	0	0	0	0	0	0	0	0	0	0	0	0	0	0	0	0	0	0	0	0	0	0	0	0
OTU_1942	0	0	0	0	0	0	0	0	0	0	0	0	0	0	0	0	0	0	0	0	0	0	0	0	0	0	0	0	0	0	0	0	0	0	0	0	0	0	0	0	0	0	0	0	0	4.24773e-05	0	0	0
OTU_1943	0	0	0	0	0	0	0	0	0	0	0	0	0	0	0	0	0	0	0	0	0	0	0	0	0	0	0	4.24773e-05	0	0	0	4.24773e-05	4.24773e-05	0	0	0	0	0	0	0	0	0	0	0	0	0	0	0	0
OTU_1944	0	0	0	0	0	0	0	0	0	0	4.24773e-05	0	0	0	0	0	0	0	0	0	0	0	0	0	0	0	0	0	0	0	0	0	0	0	0	0	0	0	0	0	0	0	0	0	0	0	0	0	0
OTU_1945	0	0	0	0	0	0	0	0	4.24773e-05	0	0	0	0	0	0	0	0	0	0	0	0	0	0	0	0	0	0	0	0	0	0	0	0	0	0	0	0	0	0	0	0	0	0.000127432	0.000637159	0	0	0	0	0.000297341
OTU_1946	0	0	0	0	0	0	0	0	0	0	0	0	0	0	0	0	0	0	0	0	0	0	0	0	0	0	0	0	0	0	0	0	0	0	0	0	0	0	0	0	0	0	0	0	4.24773e-05	0	0	0	0
OTU_1947	0	0	0	0	0	0	0	0	0	0	0	0	0	0	0	0	0	0	0	0	0	0	0	0	0	0	0	0	0	0	0	0	0	0	0	0	0	0	0	0	0	0	0	0	0	0	0	0	0
OTU_195	0	0	0	0	0	0	0	0	0	0	0	0	0	0	0	0	0	0	0	0	0	0	0	0	0	0	0	0	0	0	0	0	0	0	0	0	0	0	0	0	0	0	0	0	0	0	0	0	0
OTU_1950	0	0	0	0	0	0	0	0	0	0	0	0	0	0	0	0	0	0	0	0	0	0	0	0	0	0	0	0	0	0	0	0	0	0	0	0	0	0	0	0	0	0	0	0	0	0	0	0	0
OTU_1951	0	0	0	0	0	0	0	0	0	0	0	0	0	4.24773e-05	0	0	0	0	0	0	0	0	0	0	0	0	0	0	0	0	0	0	0	0	0	0	0	0	0	0	0	0	0.000807068	0.00110441	0	8.49545e-05	0	0	0
OTU_1953	0	0	0	0	0	0	0	0	0	0	0	0	0	0	0	0	0	0	0	0	0	0	0	0	0	0	0	0	0	0	0	0	0	0	0	0	0	0	0	0	0	0	0	0	0	0	0	0	0
OTU_1954	0	0	0	0	0	0	0	0	0	0	0	0	0	0	0	0	0	0	0	0	0	0	0	0	0	0	0	0	0	0	0	0	0	0	0	0	0	0	0	0	0	0	0	0	0	0	0	0	0
OTU_1955	0	0	0	0	0	0	0	0	0	0	0	0	4.24773e-05	0	0	0	0	0	0	0	0	0	0	0	0	0	0	4.24773e-05	4.24773e-05	0	0	0	0	0	0	0	0	0	0	0	0	0	0	0	0	4.24773e-05	0	0	4.24773e-05
OTU_1957	0	0	0	0	0	0	0	0	0	0	0	0	0	0	0	0	0	0	0	0	0	0	0	0	0	0	0	0	0	0	0	0	0	0	0	0	0	0	0	0	0	0	0	0	0	0	0	0	0
OTU_1959	0	0	0	0	0	0	0	0	0	0	0	0	0	0	0	0	0	0	0	0	0	0	0	0	0	0	0	0	0	0	0	0	0	0	0	0	0	0	0	0	0	0	0	0	0	0	0	0	0
OTU_196	0	0	0	0	0	0	0	0	0	0	0	0	0	0	0	0	0	0	0	0.000127432	0	0	0	0	0	0	0	0	0	0	0	0	0	0	0	0	0	0	0	0	0	0	0	0	0	0	0	0	0
OTU_1960	0	0	0	0	0	0	0	4.24773e-05	0	0	0	0	0	0	4.24773e-05	0	4.24773e-05	0	4.24773e-05	4.24773e-05	0	4.24773e-05	0	4.24773e-05	0	0	4.24773e-05	0	0	0	4.24773e-05	0	0	0	0	0.000127432	0	8.49545e-05	0	0	8.49545e-05	0	0.000169909	0.000127432	0	0.000509727	0.000212386	0.0014867	0.000212386
OTU_1961	0	0	0	0	0	0	0	0	0	0	0	0	0	0	0	0	0	0	0	0	0	0	0	0	0	0	0	0	0	0	0	0	0	0	0	0	0	0	0	0	0	0	0	0	0	0	0	0	0
OTU_1962	0	0	0	0	0	0	0	0	0	0	0	0	0	0	0	0	0	0	0	0	0	0	0	0	0	0	0	0	0	0	0	0	0	0	0	0	0	0	0	0	0	0	0	0	0	0	0	0	0
OTU_1963	0	0	0	0	0	0	0	0	0	0	0	0	0	0	0	0	0	0	0	0	0	0	0	0	0	0	0	0	0	0	0	0	0	0	0	0	0	0	0	0	0	0	0	0	0	0	0	0	0
OTU_1964	0	0	0	0	0	0	0	0	0	0	0	0	0	0	0	0	0	0	0	0	0	0	0	0	4.24773e-05	0	0	0	4.24773e-05	0	0	0	0	0	0	0	0	0	0	0	0	0	0.00220882	0.00106193	0	0.000764591	0.000892023	0.00046725	4.24773e-05
OTU_1965	0	0	0	0	0	0	0	0	0	0	0	0	0	0	0	0	0	0	0	0	0	0	0	0	0	0	0	0	0	0	0	0	0	0	0	0	0	0	0	0	0	0	0	0	0	4.24773e-05	0	0	0
OTU_1966	0	0	0	0	0	0	0	0	0	0	0	0	0	0	0	0	0	0	0	0	0	0	0	0	0	0	0	0	0	0	0	0	0	0	0	0	0	0	0	0	0	0	0	0	0	0	0	0	0
OTU_1967	0	0	0	0	0	0	0	0	0	0	0	0	0	0	0	0	0	0	0	0	0	0	0	0	0	0	0	4.24773e-05	0	0	0	0	0	0	0	0	0	0	0	0	0	0	0	0	0	0	0	0	0
OTU_1968	0	0	0	0	0	0	0	0	0	0	0	0	0	0	0	0	0	0	0	0	0	0	0	0	0	0	0	0	0	0	0	0	0	0	0	0	0	0	0	0	0	0	0	0	0	0	0	0	0
OTU_1969	0	0	4.24773e-05	8.49545e-05	0	0	8.49545e-05	0.000169909	0	0.000127432	4.24773e-05	0.000127432	4.24773e-05	0	0.000169909	0	0	0.000169909	0	0	0	8.49545e-05	0	8.49545e-05	0	4.24773e-05	0	8.49545e-05	0	0	8.49545e-05	0	0	0	0	0	0	8.49545e-05	4.24773e-05	4.24773e-05	0.000169909	0	8.49545e-05	0.00135927	0	0	0	0.000509727	0.0119786
OTU_197	0	0	0	0	0	0	0	0	0	0	0	0	0	0	0	0	0	0	0	0.000169909	0	0	0	0	0	0	0	0	0	0	0	0	0	0	0	0	0	0	0	0	0	0	0	0	0	0	0	0	0
OTU_1970	0	0	0	0	0	0	0	0	0	0	0	0	0	0	0	0	0	0	0	0	0	0	0	0	0	0	0	0	0	0	0	0	0	0	0	0	0	0	0	0	0	0	0	0	0	0	0	0	0
OTU_1971	0	0	0	0	0	0	0	0	0	0	0	0	0	0	0	0	0	0	0	0	0	0	0	0	0	0	0	0	0	0	0	0	0	0	0	0	0	0	0	0	0	0	0	0	0	0	0	0	0
OTU_1972	0	0	0	0	0	0	0	0	0	0	0	0	0	0	0	0	0	0	0	0	0	0	0	0	0	0	0	0	0	0	0	0	0	0	0	0	0	0	0	0	0	0	0	8.49545e-05	0.000807068	0	0	0	0
OTU_1973	0	0	0	0	0	0	0	0	0	0	0	0	0	0	0	0	0	0	0	0	0	0	0	0	0	0	0	0	0	0	0	0	0	0	0	0	0	0	0	0	0	0	8.49545e-05	0.000169909	0.000552205	0	0	0	0
OTU_1974	0	0	0	0	0	0	0	0	0	0	0	0	0	0	0	0	0	0	0	0	0	0	0	0	0	0	0	0	0	0	0	0	0	0	0	0	0	0	0	0	0	0	0	0	0	0	0	0	0
OTU_1975	0	0	0	0	0	0	4.24773e-05	0	0	0	0	0	0	0	0	0	0	0	0	0	0	0	0	0	4.24773e-05	0	0	0	0	0.000127432	0	4.24773e-05	0	4.24773e-05	0	0	0	4.24773e-05	4.24773e-05	0	0	0	0	0	0	0	0	0	0
OTU_1976	0	0	0	0	0	0	0	0	0	0	0	0	0	0	0	0	0	0	0	0	0	0	0	0	0	0	0	0	0	0	0	0	0	0	0	0	0	0	0	0	0	0	0	0	0	0	0	0	0
OTU_1977	0	0	0	0	0	0	0	0	0	0	0	0	0	0	0	0	0	0	0	0	0	0	0	0	0	0	0	0	0	0	0	0	0	0	0	0	0	0	0	0	0	0	4.24773e-05	0	0	0	0	0	0
OTU_1978	0	0	0	0	0	0	0	0	0	0	0	0	0	0	0	0	0	0	0	4.24773e-05	0	0	0	0	0	0	0	4.24773e-05	0	0	0	4.24773e-05	0	0	0	0	0	0	0	0	0	8.49545e-05	0	0	0	0	0	0	0
OTU_1979	0	0	0	0	0	0	0	0	0	0	0	0	0	0	0	0	0	0	0	0	0	0	0	0	0	0	0	0	0	0	0	0	0	0	0	0	0	0	0	0	0	0	0.000509727	0	0	0	0	0	0
OTU_198	0	0	0	0	0	0	0	0	0	0	0	0	0	0	0	0	0	0	0	0	0	0	0	0	0	0	0	0	0	0	0	0	0	0	0	0	0	0	0	0	0	0	0	0	0	0	0	0	0
OTU_1980	0	0	0	0	0	0	0	0	0	0	0	0	0	0	0	0	0	0	0	0	0	0	0	0	0	0	0	0	0	0	0	0	0	0	0	0	0	0	0	0	0	0	0	0	0	0	0	0	0
OTU_1981	0	0	0	0	0	0	0	0	0	0	0	0	0	0	0	0	0	0	0	0	0	0	0	0	0	0	0	0	0	0	0	0	0	0	0	0	0	0	0	0	0	0	0	0	0	0	0	0	0
OTU_1982	0	0	0	0	0	0	0	0	0	0	0	0	0	0	0	0	0	0	0	4.24773e-05	0	0	0	0	0	0	0	0	0	0	0	0	0	0	0	0	0	0	0	0	0	0	0	0	0	0	0	0	0
OTU_1983	0	0	0	0	0	0	0	0	0	0	0	0	0	0	0	0	0	0	0	0	0	0	0	0	0	0	0	0	0	0	0	0	0	0	0	0	0	0	0	0	0	0	4.24773e-05	4.24773e-05	0.000127432	0	0	0	0
OTU_1984	0	0	0	0	0	0	0	0	0	0	0	0	0	0	0	0	0	0	0	0	0	0	0	0	0	0	0	0	0	0	0	0	0	0	0	0.000339818	0	0	0	0	0	4.24773e-05	0	0	0	0	0	0	0
OTU_1985	0	0	0	0	0	0	0	0	0	0	0	0	0	0	0	0	0	0	0	0	0	0	0	0	0	0	0	0	0	0	0	0	0	0	0	0	0	0	0	0	0	0	0	0	0	0	0.000212386	8.49545e-05	0
OTU_1986	0	0	0	0	0	0	0	0	0	0	0	0	0	0	0	0	0	0	0	0	0	0	0	0	0	0	0	0	0	0	0	0	0	0	0	0	0	0	0	0	0	0	0	0	0	0	0	0	0
OTU_1987	0	0	0	0	0	0	0	0	0	0	0	0	0	0	0	0	0	0	0	0	0	0	0	0	0	0	0	0	0	0	0	0	0	0	0	0	0	0	0	0	0	0	0	0	0	0	0	0	0
OTU_1988	0	0	0	0	0	0	0	0	0	0	0	0	0	0	0	0	0	0	0	0	0	0	0	0	0	0	0	0	0	0	0	0	0	0	0	0	0	0	0	0	0	0	0	0	0	0	0	0	0
OTU_1989	0	0	0	0	0	0	0	0	0	0	0	0	0	0	0	0	0	0	0	0	0	0	0	0	0	0	0	0	0	0	0	0	0	0	0	0	0	0	0	0	0	0	0.000127432	0	0	0	0	0	0
OTU_199	0	0	0	0	0	0	0	0	0	0	0	0	0	0	0	0	0	0	0	0	0	0	0	0	0	0	0	0	0	0	0	0	0	0	0	0	0	0	0	0	0	0	0	0	0	0	0	0	0
OTU_1990	0	0	0	0	0	0	0	0	0	0	0	0	0	0	0	0	0	0	0	0	0	0	0	0	0	0	0	0	0	0	0	0	0	0	0	0	0	0	0	0	0	0	0	0	0	0	0	0	0
OTU_1991	0	0	0	0	0	0	0	0	0	0	0	0	0	0	0	0	0	0	0	0	0	0	0	0	0	0	0	0	0	0	0	0	0	0	0	0	0	0	0	0	0	0	0	0	0	0	0	0	0
OTU_1992	0	0	0	0	0	0	0	0	0	0	0	0	0	0	0	0	0	0	0	4.24773e-05	0	0	0	0	0	0	0	0	0	0	0	0	0	0	0	0	0	0	0	0	0	0	0	0	0	0	0	0	4.24773e-05
OTU_1993	0	0	0	0	0	0	0	0	0	0	0	0	0	0	0	0	0	0	0	0	0	0	0	0	0	0	0	0	0	0	0	0	0	0	0	0	0	0	0	0	0	0	0	0	0	0	0	0	0
OTU_1994	0	0	0	4.24773e-05	0	0	0	0	0	0	0	0	0	0	0	0	0	0	0	0	0	0	0	8.49545e-05	0	0.000127432	0	0	0	0	0	0	0	0	0	0	0	0	0	0	0	0	0	0	0	0	0	8.49545e-05	0
OTU_1995	0	0	0	0	0	0	0	0	0	0	0	0	0	0	0	0	0	0	0	0	0	0	0	0	0	0	0	0	0	0	0	0	0	0	0	0	0	0	0	0	0	0	0	0	0	0	0	0	0
OTU_1996	4.24773e-05	0	0.000339818	8.49545e-05	8.49545e-05	0.000254864	0	0	0	0	0	0	0	0	0	0	0.000552205	0	0.000892023	8.49545e-05	0.000127432	0	0	0	0.000594682	0.000127432	4.24773e-05	0	4.24773e-05	8.49545e-05	4.24773e-05	0	0	8.49545e-05	0	0	0.00110441	4.24773e-05	0	8.49545e-05	4.24773e-05	0	0.0426897	0.00590434	0.000509727	0.00297341	0.00169909	0.00195395	0
OTU_1997	0.00815564	0.0306261	0.000127432	0.000127432	8.49545e-05	0.0013168	0.00229377	0.000552205	0.000127432	0.0498683	0.0325376	0.064438	0.000807068	0.000509727	0.000127432	0.0965933	0.181675	0.0838926	4.24773e-05	0	4.24773e-05	0.000339818	0.000297341	0.000382295	4.24773e-05	8.49545e-05	0	0.00174157	4.24773e-05	0.000637159	0.000552205	0.00046725	0.00118936	0.00203891	0.0014867	0.00135927	0.000424773	0.000424773	0.000382295	0.000297341	0.0009345	0.000254864	0	0	0	0	4.24773e-05	0	0.000127432
OTU_1998	0	0	0	0	0	0	0	0	0	0	0	0	0	0	0	0	0	0	0	0	0	0	0	0	0	0	0	0	0	0	0	0	0	0	0	0	0	0	0	0	0	0	0	0	0	0	0	0	0
OTU_2	0	0	0	0	0	0	0	0	0	0	0	0	0	0	0	0	0	0	0	0	0	0	0	0	0	0	0	0	0	0	0	0	0	0	0	0	0	0	0	0	0	0	0	0	0	0	0	0	0
OTU_20	0	0	0	0	0	0	0	0	0	0	0	0	0	0	0	0	0	0	0	0	0	0	0	0	0	0	0	0	0	0	0	0	0	0	0	0	0	0	0	0	0	0	0	0	0	0	0	0	0
OTU_200	0	0	0	0	0	0	0	0	0	0	0	0	0	0	0	0	0	0	0	0	0	0	0	0	0	0	0	0	0	0	0	0	0	0	0	0	0	0	0	0	0	0	0	0	0	0	0	0	0
OTU_2000	0	0	0	0	0	0	0	0	0	0	0	0	0	0	0	0	0	0	0	0	0	0	0	0	0	0	0	0	0	0	0	0	0	0	0	0	0	0	0	0	0	0	0	0	0	0	0	0	0
OTU_2001	0	0	0	0	0	0	0	0	0	0	0	0	0	0	0	0	0	0	4.24773e-05	0	0	0	0	0	0	0	0	0	0	0	0	4.24773e-05	0	0	0	0	0	0	0	0	0	0	0	0	0	0	0	0	0
OTU_2002	0	0	0	0	0	0	0	0	0	0	0	0	0	0	0	0	0	0	0	0	0	0	0	0	0	0	0	0	0	0	0	0	0	0	0	0	0	0	0	0	0	0	0	0	0	0	0	0	0
OTU_2003	0	4.24773e-05	0	0	0	0	0	4.24773e-05	4.24773e-05	0	0	0	4.24773e-05	0	0	4.24773e-05	0	0	0	0	8.49545e-05	8.49545e-05	0	0	8.49545e-05	0	4.24773e-05	0.000382295	4.24773e-05	4.24773e-05	0.000127432	0.000169909	0.000297341	8.49545e-05	0	4.24773e-05	0	0	0	4.24773e-05	0	4.24773e-05	4.24773e-05	0	4.24773e-05	8.49545e-05	4.24773e-05	0	4.24773e-05
OTU_2004	0	0	0	0	0	0	0	0	0	4.24773e-05	8.49545e-05	8.49545e-05	4.24773e-05	0	0	0	0	0	0	0	0	0	4.24773e-05	0	0	0	0	0	0	0	0	0	0	0	0	0	0	0	0	0	0	0	0	0	0	0	0	0	0
OTU_2005	0	0	0	0	0	0	0	0	0	0	0	0	0	0	0	0	0	0	0	0	0	0	0	0	0	0	0	0	0	0	0	0	0	0	0	0	0	0	0	0	0	0	0	0	0	0	0	0	0
OTU_2006	4.24773e-05	0	0	0	0	0	4.24773e-05	0	0	0	0	0	0	0	0	0	0	0	0	0	0	0	0	0	0	0	0	0	0	0	0	0	4.24773e-05	0	0	0	0	8.49545e-05	0	0	4.24773e-05	4.24773e-05	0	0	0	0	0	0	0
OTU_2007	0	0	0	0	0	0	0	0	0	0	0	0	0	0	0	0	0	0	0	0	0	0	0	0	0	0	0	0	0	0	0	0	0	0	0	0	0	0	0	0	0	0	0	0	0	0	0	0	0
OTU_2008	0	0	0	0	0	0	0	0	0	0	0	0	0	0	0	0	0	0	0	0	0	0	0	0	0	0	0	0	0	0	0	0	0	0	0	0	0	0	0	0	0	0	0	0	0	0	0	0	0
OTU_2009	0	0	0	0	0	0	0	0	0	0	0	0	0	0	0	0	0	0	0	0	0	0	0	0	0	0	0	0	0	0	0	0	0	0	0	0	0	0	0	0	0	0	0	0	0	0	0	0	0
OTU_201	0	0	0	0	0	0	0	0	0	0	0	0	0	0	0	0	0	0	0	0	0	0	0	0	0	0	0	0	0	0	0	0	0	0	0	0	0	0	0	0	0	0	0	0	0	0	0	0	0
OTU_2010	0	0	0	0	0	0	0	0	0	0	0	0	0	0	0	0	0	0	0	0	0	0	0	0	0	0	0	0	0	0	0	0	0	0	0	0	0	0	0	0	0	0	0	0	0	0	0	0	0
OTU_2011	0	0	0	0	0	0	0	0	0	0	0	0	0	0	0	0	0	0	0	4.24773e-05	0	0	0	0	0	0	0	0	0	0	0	0	0	0	0	0	0	0	0	0	0	0	0	0	0	0	0	0	0
OTU_2012	0	0	0	0	0	0	0	0	0	0	0	0	0	0	0	0	0	0	0	0	0	0	0	0	0	0	0	0	0	0	0	0	0	0	0	0	0	0	0	0	0	0	0	0	0	0	0	0	0
OTU_2013	0	0	0	0	0	0	0	0	0	0	0	0	0	0	0	0	0	0	0	0	0	0	0	0	0	0	0	0	0	0	0	0	0	0	0	0	0	0	0	0	0	0	8.49545e-05	0	0	0	0	0	0
OTU_2014	0	0	0	0	0	0	0	0	0	0	0	0	0	0	0	0	0	0	0	0	0	0	0	0	0	0	0	0	0	0	0	0	0	0	0	0	0	0	0	0	0	0	8.49545e-05	0	0	0	0	0	0
OTU_2015	0	0	0	0	0	0	0	0	0	0	0	0	0	0	4.24773e-05	0	0	0	0	0	0	0	0	0	0	0	0	0	0	0	0	4.24773e-05	0	0	0	0	0	0	0	4.24773e-05	0	0	0	0	0	0	0	0	0
OTU_2016	0	0	0	0	0	0	0	0	0	0	0	0	0	0	0	0	0	0	0	0	0	0	0	0	0	0	0	0	0	0	0	0	0	0	0	0	0	0	0	0	0	0	0	0	0	0	0	0	0
OTU_2018	0	0	0	0	0	0	0	0	0	0	0	0	0	0	0	0	0	0	0	0	0	0	0	0	0	0	0	0	0	0	0	0	0	0	0	0	0	0	0	0	0	0	0	0	0	0	0	0	0
OTU_2019	0	0	0	0	0	0	0	0	0	0	0	0	0	0	0	0	0	0	0	0	0	0	0	0	0	0	0	0	0	0	0	0	0	0	0	0	0	0	0	0	0	0	0	0	0	0	0	0	0
OTU_202	0	0	0	0	0	0	0	0	0	0	0	0	0	0	0	0	0	0	0	0	0	0	0	0	0	0	0	0	0	0	0	0	0	0	0	0	0	0	0	0	0	0	0	0	0	0	0	0	0
OTU_2021	0	0	0	0	0	0	0	0	0	0	0	0	0	0	0	0	0	0	0	0	0	0	0	0	0	0	0	0	0	0	0	0	0	0	0	0	0	0	0	0	0	0	0	0	0	0	0	0	0
OTU_2023	0	0	0	0	0	0	0	0	0	0	0	0	4.24773e-05	0	0	0	0	0	0	0	0	0	0	0	0	0	8.49545e-05	0	0	0	0	0	0	0	0	0	0	0	0	0	0	0	0.0014867	0.00152918	0	0.000509727	0.000339818	0.000212386	8.49545e-05
OTU_2024	0	0	0	4.24773e-05	0	0	4.24773e-05	4.24773e-05	0	0	0	0	4.24773e-05	0	0	0	0	0	0	0	4.24773e-05	4.24773e-05	0.000127432	8.49545e-05	8.49545e-05	8.49545e-05	4.24773e-05	0.000339818	0.000127432	0.000127432	4.24773e-05	8.49545e-05	4.24773e-05	0	0	0	0	0	8.49545e-05	4.24773e-05	4.24773e-05	0	0	0	0	0	0	0	4.24773e-05
OTU_2025	0	0	0	0	0	0	0	4.24773e-05	0	0	0	0	0	0	0	0	0	0	4.24773e-05	0	0	0	0	0	0	0	0	0	0	0	0	0	0	0	0	0	0	4.24773e-05	0	0.000127432	0.000127432	0.000127432	0	4.24773e-05	0	0	0	0	0
OTU_2026	0	0	0	0	0	0	0	0	0	0	0	0	0	0	0	0	0	0	0	0	0	0	0	0	0	0	0	0	0	0	0	0	0	0	0	0	0	0	0	0	0	0	0	0	0	0	0	0	0
OTU_2027	0	0	0	0	0	0	0	0	0	0	0	0	0	0	0	0	0	0	0	0	0	0	0	0	0	0	0	0	0	0	0	0	0	0	0	0	0	0	0	0	0	0	0	0	0	0	0	0	0
OTU_2028	0	0	0	0	0	0	0	0	4.24773e-05	0	0	0	0	0	0	0	0	0	8.49545e-05	0.00191148	0.0042902	0	0	0	0.000169909	8.49545e-05	8.49545e-05	0	4.24773e-05	0	0.000127432	4.24773e-05	0	0	0	4.24773e-05	0.000169909	0.000212386	0.000127432	0.000679636	0.00046725	0.00046725	0	0	4.24773e-05	0	0.000169909	4.24773e-05	0
OTU_2029	0	0	0	0	0	0	0	0	0	0	0	0	0	0	0	0	0	0	0	0	0	0	0	0	0	0	0	0	0	0	0	0	0	0	0	0	0	0	0	0	0	0	0	0	0	0	0	0	0
OTU_203	0	0	0	0	0	0	0	0	0	0	0	0	0	0	0	0	0	0	0	0	0	0	0	0	0	0	0	0	0	0	0	0	0	0	0	0	0	0	0	0	0	0	0	0	0	0	0	0	0
OTU_2031	0	0	0	0	0	0	0	0	0	0	0	0	0	0	0	0	0	0	0	0	0	0	0	0	0	0	0	0	0	0	0	0	0	0	0	0	0	0	0	0	0	0	0	0	0	0	0	0	0
OTU_2032	0	0	0	0	0	0	0	0	0	0	0	0	0	0	0	0	0	0	0	0	0	0	0	0	0	0	0	0	0	0	0	0	4.24773e-05	0	0	0	0	0	0	0	0	0	0	0	0	0	0	0	0
OTU_2034	0	0	0	0	0	0	0	0	0	0	0	0	0	0	0	0	0	0	0	0	0	0	0	0	0	0	0	0	0	0	0	0	0	0	0	0	0	0	0	0	0	0	0	0	0	0	0	0	0
OTU_2035	0	0	0	0	0	0	0	0	0	0	0	0	0	0	0	0	0	0	0	0	0	0	0	0	0	0	0	0	0	0	0	0	0	0	0	0	0	0	0	0	0	0	0	0	0	0	0	0	0
OTU_2036	0	0	0	0	0	0	0	0	0	0	0	0	0	0	0	0	0	0	0	0	0	0	0	0	0	0	0	0	0	0	0	0	0	0	0	0	0	0	0	0	0	0	0	0	0	0	0	0	0
OTU_2038	0	0	0	0	0	0	0	0	0	4.24773e-05	0	0	0	0	0	0	0	0	0	0	0	0	0	0	0	0	0	0	0	0	4.24773e-05	0	0	0	0	0	0	0	0	0	0	0	0	0	0	0	0	0	0
OTU_2039	0	0	0	0	0	0	0	0	0	0	0	0	4.24773e-05	0	0	0	0	0	0	0	4.24773e-05	0	0	0	0	0	0	0	0	0	0	0	0	0	0	0	0	0	0	0	0	0	0	0	0	0	0	0	0
OTU_204	0	0	0	0	0	0	0	0	0	0	0	0	0	0	0	0	0	0	0	0	0	0	0	0	0	0	0	0	0	0	0	0	0	0	0	0	0	0	0	0	0	0	0	0	0	0	0	0	0
OTU_2040	0	0	0	4.24773e-05	0	0	0	0	0	0	0	0	0	0	0	0	0	0	0	8.49545e-05	0	0	0	0	0	0	0	0	0	0	0	0	0	0	0	0	0	0	0	0	0	0	4.24773e-05	0	0	0	8.49545e-05	0	0
OTU_2041	0	0	0	0	0	0	0	0	0	0	0	0	0	0	0	0	0	0	0	0	0	0	0	0	0	0	0	0	0	0	0	0	0	0	0	0	0	0	0	0	0	0	0	0	0	0	0	0	0
OTU_2042	0	0	0	0	0	0	0	0	0	0	0	0	0	0	0	0	0	0	0	0	0	0	0	0	0	0	0	0	0	0	0	0	0	0	0	0	0	0	0	0	0	0	0	0	0	0.000127432	0	0	0
OTU_2043	0	0	0	0	0	0	0	0	0	0	0	0	0	0	4.24773e-05	0	0	4.24773e-05	0	0	0	0	0	0	0	0	0	0	0	0	0	0	0	0	0	4.24773e-05	0	0	0	0	0	0	0	0	0	0	4.24773e-05	0	0
OTU_2044	0	0	0	0	0	0	0	0	0	0	0	0	0	0	0	0	0	0	8.49545e-05	4.24773e-05	0	0	0	0	0	0	0	0	0	0	0	0	0	0	0	0	0	0	0	0	0	0	0	0	0	0	0	0	0
OTU_2045	0	0	0	0.000764591	4.24773e-05	4.24773e-05	0	0	0.000127432	0	0.000212386	0	4.24773e-05	0	0	0	0	0	0	0	0	0	0.000169909	0	0	0	0	0	0	0	0	0.000127432	0	0	0	0	0	4.24773e-05	0	8.49545e-05	0	0	0	0	0	0	0	0	4.24773e-05
OTU_2046	0	0	0	0	0.000637159	4.24773e-05	4.24773e-05	0	0.000169909	4.24773e-05	8.49545e-05	4.24773e-05	8.49545e-05	0	4.24773e-05	4.24773e-05	0	0	0	0	0	0	0	4.24773e-05	0	0	0	4.24773e-05	0	0	0	0	4.24773e-05	0	0	0	0	8.49545e-05	0.000169909	0	8.49545e-05	0	0	0	0	0	0	0	0
OTU_2047	0	4.24773e-05	0	0	0	0	4.24773e-05	0	8.49545e-05	4.24773e-05	0.000127432	0	0.000382295	0.000509727	0.000339818	0	0	0	0	0	0	0	0	0	0	0	0	0	0	0	0	0	0	0	0	0	0	0	0	0	0	4.24773e-05	0	0	0	0	0	0	0
OTU_2048	0	0	0	0	0	0	0	8.49545e-05	0	0	4.24773e-05	0	0	0	0	0	0	0	0	0	0	0	0	0	0	0	0	4.24773e-05	0	0	4.24773e-05	4.24773e-05	0	0	8.49545e-05	0	0	8.49545e-05	0	0	0	0	0	0	0	0	0	0	0
OTU_2049	0	0	0	4.24773e-05	0	0	0	4.24773e-05	4.24773e-05	0	8.49545e-05	0	8.49545e-05	0	0	0	0	4.24773e-05	0	0	0	0	0	0	0	0	0	8.49545e-05	0.000169909	8.49545e-05	8.49545e-05	0.000212386	0.000254864	0	0	0	0	0	4.24773e-05	8.49545e-05	4.24773e-05	0	0	0	0	0	0	0	0.000297341
OTU_205	0	0	0	0	0	0	0	0	0	0	0	0	0	0	0	0	0	0	0	0	0	0	0	0	0	0	0	0	0	0	0	0	0	0	0	0	0	0	0	0	0	0	0	0	0	0	0	0	0
OTU_2050	0	0	0	0	0	0	0	0	0	0	0	0	0	0	0	0	0	4.24773e-05	0	0	0	0	4.24773e-05	0	0	0	0	0	0	0	0	8.49545e-05	0	0	0	0	0	0	0	0.000127432	0	0	0	0	0	0	0	0	4.24773e-05
OTU_2051	0	0	0	0	0	0	0	0	0	0	0	0	0	0	0	0	0	0	0	0	0	0	0	0	4.24773e-05	0	0	0.000339818	0	0	0	0	0	0	0	0	0	0	0	0	0	0	0	0	0	0	0	0	4.24773e-05
OTU_2052	0	0	0	0	0	0	0	0	0	0	0	0	0	0	0	0	0	0	0	0	0	0	0	0	0	0	0	0	0	0	0	0	0	0	0	0	0	0	0	0	0	0	8.49545e-05	0	0	4.24773e-05	0	0	0
OTU_2053	0	0	0	0	0	0	0	0	0	0	0	0	0	0	0	0	0	0	0	0	0	0	0	0	0	0	0	0	0	0	0	0	0	0	0	0	0	0	0	0	0	0	0	0	0	0	0	0	0
OTU_2054	0	0	0	0	0	0	0	0	0	0	0	0	0	0	0	0	0	0	0	0	0	0	0	0	0	0	0	0	0	0	0	0	0	0	0	0	0	0	0	0	0	0	0	0	0	0	0	0	0
OTU_2055	0	0	0	0	0	0	0	0	0	0	0	0	0	0	0	0	0	0	0	0	0	0	0	0	0	0	0	0	0	0	0	0	0	0	0	0	0	0	0	0	0	0	0	0	0	0	0	0	0
OTU_2056	0	0	0	0	0	0	0	0	0	0	0	0	0	0	0	0	0	0	0	0	0	0	0	0	0	0	0	0	0	0	0	0	0	0	0	0	0	0	0	0	0	0	0	0	0	4.24773e-05	0	0	0
OTU_2057	0	0	0	0	0	0	0	0	0	0	0	0	0	0	0	0	0	0	0	0	0	0	0	0	0	0	0	0	0	0	0	0	0	0	0	0	0	0	0	0	0	0	0	0	0	0	0	0	0
OTU_2058	0	0	0	0	0	0	0	0	0	0	0	0	0	0	0	0	0	0	0	0	0	0	0	0	0	0	0	0	0	0	0	0	0	0	0	0	0	0	0	0	0	0	0	0	0	0	0	0	0
OTU_2059	0	0	0	0	0	0	0	0	0	0	0	0	0	0	0	0	0	0	0	0	0	0	0	0	0	0	0	0	0	0	0	0	0	0	0	0	0	0	0	0	0	0	0	0	0	0	0	0	0
OTU_206	0	0	0	0	0	0	0	0	0	0	0	0	0	0	0	0	0	0	0	0	0	0	0	0	0	0	0	0	0	0	0	0	0	0	0	0	0	0	0	0	0	0	0	0	0	0	0	0	0
OTU_2060	0	0	0	0	0	0	0	0	0	0	0	0	0	0	0	0	0	4.24773e-05	0	0	0	0	0	0	0	0	0	0	0	0	0	0	0	0	0	4.24773e-05	0	0	0	0	0	0	0	0	0	0	0	0	0
OTU_2061	0	0	0	0	0	0	0	0	0	0	0	0	4.24773e-05	0	0	0	0	0	0.000127432	4.24773e-05	4.24773e-05	0	0	0	0	0	0	0	0	0	0	0	0	0	0	0	4.24773e-05	4.24773e-05	0	0	0	0	0	0	0	0	0	0	0
OTU_2062	0	0	0	0	0	0	0	0	0	0	0	0	0	0	0	0	0	0	0	0	0	0	0	0	0	0	0	0	0	0	0	0	0	0	0	0	0	0	0	0	0	0	0.000169909	0.000212386	0	0	0	0	0
OTU_2063	0	0	0	0	0	8.49545e-05	0.000169909	0.000169909	4.24773e-05	4.24773e-05	0	8.49545e-05	0	0	0	0	4.24773e-05	0	0	0	0	0.000169909	0.000594682	0.000127432	0.000212386	0	4.24773e-05	8.49545e-05	4.24773e-05	4.24773e-05	0	0	0	0	4.24773e-05	4.24773e-05	8.49545e-05	0.000169909	0.000127432	4.24773e-05	4.24773e-05	8.49545e-05	0	0	0	4.24773e-05	0	0	0
OTU_2064	0	0	0	0	0	0	0	0	0	0	0	0	0	0	0	0	0	0	0	0	0	0	0	0	0	0	0	0	0	0	0	0	0	0	0	0	0	0	0	0	0	0	0	0	0	0	0	0	0
OTU_2066	0	0	0	0	0	0	0	0	0	0	0	0	0	0	0	0	0	0	0	0	0	0	0	0	0	0	0	0	0	0	0	0	0	0	0	0	0	0	0	0	0	0	0	0	4.24773e-05	0	0	0	0
OTU_2067	0	0	0	0	0	0	0	0	0	0	0	0	0	0	0	0	0	0	0	0	0	0	0	0	0	0	0	0	0	0	0	0	0	0	0	0	0	0	0	0	0	0	0	0	0	4.24773e-05	0	0	0
OTU_2068	0	0	0	0	0	0	0	0	0	0	0	0	0	0	0	0	0	0	0	0	0	0	0	0	0	0	0	0	0	0	0	0	0	0	0	0	0	0	0	0	0	0	0	0	0	0	0	0	0
OTU_2069	0	0	0	0	0	0	0	0	0	4.24773e-05	8.49545e-05	0	0	8.49545e-05	0	0.000169909	0	8.49545e-05	0.000127432	0	0.000127432	0	0	0	0.0013168	0.000254864	0.000169909	0	8.49545e-05	4.24773e-05	0	0	0	4.24773e-05	0	0	4.24773e-05	0	4.24773e-05	4.24773e-05	0	0	0	0	0	0	0	0	0
OTU_207	0	0	0	0	0	0	0	0	0	0	0	0	0	0	0	0	0	0	0	0	0	0	0	0	0	0	0	0	0	0	0	0	0	0	0	0	0	0	0	0	0	0	0	0	0	0	0	0	0
OTU_2070	0	0	0	4.24773e-05	0	0	0	0	0	0	0	0	0	0	0	0	0	0	0	0	0	0	0	0	0	0	0	0	0	0	0	0	0	0	0	0	0	0	0	0	0	0	0	0	0	0	0	0	0
OTU_2071	0	0	0	0	0	4.24773e-05	0	0	0	0	0	0	0	0	0	0	4.24773e-05	0	0	4.24773e-05	0	0	0	0	0	0	0	0	0	4.24773e-05	0	0	0	0	0	0	0	0	0	0	0	0	0	4.24773e-05	0	0	0	0	0
OTU_2072	0	0	0	0	0	0	0	0	0	0	0	0	0	0	0	0	0	0	4.24773e-05	0	4.24773e-05	0	0	0	8.49545e-05	0	0	0	4.24773e-05	0	0	0	0	0	4.24773e-05	8.49545e-05	0	0	0	0	0	0	0.00152918	0.00118936	0.00208139	0.00488489	0.00416277	0.0050548	0.00046725
OTU_2073	0.000169909	0.000212386	4.24773e-05	0.000127432	0.000127432	0	8.49545e-05	4.24773e-05	4.24773e-05	4.24773e-05	0	0	0	0.000127432	8.49545e-05	4.24773e-05	0	0	0	0	0	0	0	0	0	0.000127432	0	0	0	0	0	0	0.000169909	8.49545e-05	0	0	0	4.24773e-05	0	0	0	8.49545e-05	0	0	0	0	0	0	0
OTU_2074	0	0	0	0	0	0	0	0	0	0	0	0	0	0	0	0	0	0	0	0	0	0	0	0	0	0	0	0	0	0	0	0	0	0	0	0	0	0	0	0	0	0	0	0	0	0	0	0	0
OTU_2075	0	0	0	0	0	0	0	0	0	0	0	0	0	0	0	0	0	0	0	0	0	0	0	0	0	0	0	0	0	0	0	0	0	0	0	0	0	0	0	4.24773e-05	0	0	0	0	0	0	0	0	0
OTU_2076	0	0	0	0	8.49545e-05	0	0	0	0	0	0	0	0	0	0	0	0	0	0	0	0	0	0	0	0	0	0	0	0	0	0	0	0	0	0	0	0	0	0	0	0	0	0	0	0	0	0	0	0
OTU_2077	0	0	0	0	0	0	0	0	0	0	0	0	0	0	0	8.49545e-05	0	0	0	0	0	0	0	0	0	0	0	0	0	0	0	0	0	0	0	0	0	0	0	0	0	0	4.24773e-05	0	0.000212386	0	0	0	0
OTU_2079	0	0	0	0	0	0	0	0	0	0	0	0	0	0	0	0	0	0	0	0	0	0	0	4.24773e-05	0	4.24773e-05	0	8.49545e-05	0	0	0	4.24773e-05	8.49545e-05	0	0	0	0	0.000127432	0	4.24773e-05	4.24773e-05	0	0	0	0	0	0	0	4.24773e-05
OTU_208	0	0	0	0	0	0	0	0	0	0	0	0	0	0	0	0	0	0	0	0	0	0	0	0	0	0	0	0	0	0	0	0	0	0	0	0	0	0	0	0	0	0	0	0	0	0	0	0	0
OTU_2080	0	0	0	0	0	0	0	0	0	0	0	0	0	0	0	0	0	0	0	0	0	0	0	0	0	0	0	0	0	0	0	0	0	0	0	0	0	0	0	0	0	0	0	0	0	0	0	0	0
OTU_2081	0	0	0	0	0	0	0	0	0	0	0	0	0	0	0	0	0	0	0	0	0	0	0	0	0	0	0	0	0	0	0	0	0	0	0	0	0	0	0	0	0	0	0	0	0	0	0	0	0
OTU_2082	0	0	0	0	0	0	0	4.24773e-05	0	0	0	0	0	0	0	0	0	0	0	0	0	4.24773e-05	0	0	0	0	0	0	0	0	0	0	0	0	0	0	0	4.24773e-05	0	0	0	0	0	0	0	0	0	0	0
OTU_2083	0	0	0	0	0	0	0	0	0	0	0	0	0	0	0	0	0	0	0	0	0	0	0	0	0	0	0	0	0	0	0	0	0	0	0	0	0	0	0	0	0	0	0	0	0	0	4.24773e-05	0	0
OTU_2085	0	0	0	0	0	0	0	0	0	0	0	0	0	0	0	0	0	0	0	0	0	0	0	0	0	0	0	0	0	0	0	0	0	0	0	0	0	0	0	0	0	0	0	0	0	0	0	0	0
OTU_2086	0	0	0	0	0	0	0	0	0	0	0	0	0	0	0	0	0	0	0	0	0	0	0	0	0	0	0	0	0	0	0	0	0	0	0	0	0	0	0	0	0	0	0	0	0	0	0	0	0
OTU_2087	0	0	0	0	0	0	0	0	0	0	0	0	0	0	0	0	0	0	0	0	0	0	0	0	0	0	0	0	0	0	0	4.24773e-05	0	0	0	0	0	0	0	0	0	0	0	0	0	0	0	0	0
OTU_2088	0	0	0	0	0	0	0	0	0	0	0	0	0	0	0	0	0	0	0	0	0	0	0	0	0	0	0	0	0	0	0	0	0	0	0	0	0	0	0	0	0	0	0	0	0	0	0	0	0
OTU_209	0	0	0	0	0	0	0	0	0	0	0	0	0	0	0	0	0	0	0	0	0	0	0	0	0	0	0	0	0	0	0	0	0	0	0	0	0	0	0	0	0	0	0	0	0	0	0	0	0
OTU_2090	0	0	0	0	0	0	0	0	0	0	0	0	0	0	0	0	0	0	0	0	0	0	0	0	0	0	0	0	0	0	0	0	0	0	0	0	0	0	0	0	0	0	0	0	0	0	0	0	0
OTU_2092	0	0	0	0	0	0	0	0	0	0	0	0	0	0	0	0	0	0	0	0	0	0	0	0	0	0	0	0	0	0	0	0	0	0	0	0	0	0	0	0	0	0	0	0	0	0	0	0	0
OTU_2096	0	0	0	0	0	0	0	0	0	0	0	0	0	0	0	0	0	0	0	0	0	0	0	0	0	0	0	0	0	0	0	0	0	0	0	0	0	0	0	0	0	0	0	0	0	0	0	0	0
OTU_2097	0	0	0	0	0	0	0	0	0	0	0	0	0	0	0	0	0	0	0	0	0	0	0	0	0	0	0	0	0	0	0	0	0	0	0	0	0	0	0	0	0	0	0	0	0	0	0	0	0
OTU_2098	0	0	0	0	0	4.24773e-05	0	0	0	0	0	0	0	0	0	0	0	0	0	0	0	0	0	0	0	0	0	0	0	0	0	0	0	0	0	0	0	0	0	0	0	0	0	0	0.000169909	0	0	0	0
OTU_2099	0	0	0	0	0	0	0	0	0	0	0	0	0	0	0	0	0	0	0	0	0	0	0	0	0	0	0	0	0	0	0	0	0	0	0	0	0	0	0	0	0	0	0	0	0	0	0	0	0
OTU_21	0.000212386	0.000169909	0.000382295	0.000552205	0.000254864	0.000679636	0	8.49545e-05	0.000212386	0.000127432	8.49545e-05	0.000127432	0.000254864	0.000509727	8.49545e-05	0.000297341	0.000254864	0.000127432	0.000169909	0.000594682	0.000424773	0	8.49545e-05	0	0.000212386	4.24773e-05	0	0	0.000764591	0.000764591	0	4.24773e-05	0.000382295	0	8.49545e-05	0.0009345	0.000127432	0	0	0	4.24773e-05	0.000127432	0.00832555	0.000807068	0.0152493	0.000169909	0.00118936	0.000127432	0
OTU_210	0	0	4.24773e-05	0.000169909	0	0	4.24773e-05	0	4.24773e-05	0	0	0	0	0	0	0	0	0	0	0	0	0	0	0	0	0	0	0	0	0	0	0	0	0	0	0	0	0	0	0	0	0	0	0	0	0	0	0	0
OTU_2100	0	0	0	0	0	0	0	0	0	0	0	0	0	0	0	0	0	0	4.24773e-05	0	0	0	0	0	0	0	0	0	0	0	0	0	0	0	0	0	0	0	0	0	0	0	0	0	0	0	0	4.24773e-05	0
OTU_2101	0	0	0	0	0	0	0	0	0	0	0	0	0	0	0	0	0	0	0	0	0	0	0	0	0	0	0	0	0	0	0	0	0	0	0	0	0	0	0	0	0	0	0	0	0	0	0	0	0
OTU_2102	0	0	0	0	0	0	0	4.24773e-05	0	0	0	0	0	0	0	0	0	0	4.24773e-05	0	4.24773e-05	0	0	0	0	0	0	0.000424773	0.000169909	0	4.24773e-05	0	4.24773e-05	0	0	0	0	0.000169909	0	4.24773e-05	0	0	0	0	0	4.24773e-05	0	0	4.24773e-05
OTU_2103	0	0	0	0	0	0	0	0	0	0	0	0	0	0	0	0	0	0	0	0	0	0	0	0	0	0	0	0	0	0	0	0	0	0	0	0	0	0	0	0	0	0	0	0	0	0	0	0	0
OTU_2104	0	0	0	0	0	0	0	0	0	0	0	0	0	0	0	0	0	0	0	0	0	0	0	0	0	0	0	0	0	0	0	0	0	0	0	0	0	0	0	0	0	0	0	0	0	0	0	0	0
OTU_2105	0	0	0	0	0	0	0	0	0	0	0	0	0	0	0	0	0	0	0	0	0	4.24773e-05	0	0	0	0	0	8.49545e-05	0	0	4.24773e-05	4.24773e-05	0	0	0	4.24773e-05	0	0	0	0	0	0	0	0	0	0	8.49545e-05	0	0
OTU_2106	0	0	0	0	0	0	0	0	0	0	0	0	0	0	0	0	0	0	0	0	0	0	0	0	0	0	0	0	0	0	0	0	0	0	0	0	0	0	0	0	0	0	0	0	0	0	0	0	0
OTU_2109	0	0	0	0	0	0	0	0	0	0	0	0	0	0	0	0	0	0	0	0	0	0	0	0	0	0	0	0	0	0	0	0	0	0	0	0	0	0	0	0	0	0	0	0	0	0	0	0	0
OTU_211	0	0	0	0	0	0	0	0	0	0	0	0	0	0	0	0	0	0	0	0	0	0	0	0	0	0	0	0	0	0	0	0	0	0	0	0	0	0	0	0	0	0	0	0	0	0	0	0	0
OTU_2110	0	0	0	0	0	0	0	0	0	0	0	0	0	0	0	0	0	0	0	0	0	0	0	0	0	0	0	0	0	0	0	0	0	4.24773e-05	0	4.24773e-05	0	0	0	4.24773e-05	4.24773e-05	4.24773e-05	0	0	0	0	0	0	0
OTU_2112	0	0	0	0	0	4.24773e-05	0	0	0	0	8.49545e-05	0	4.24773e-05	4.24773e-05	0	0	0	0	0	0.000127432	0	0	0	0	0	0	0	0	0	0	0	0	0	0	0	0	0	0	0	0	0	0	0.00144423	0.00233625	8.49545e-05	0.000297341	0.000339818	0.000637159	0
OTU_2113	0	0	0	0	0	0	0	0	0	0	0	0	0	0	0	0	0	0	0	0	0	0	0	0	0	0	0	0	0	0	0	0	0	0	0	0	0	0	0	0	0	0	8.49545e-05	0	0	0	0	0	0
OTU_2114	0	0	0	0	0	0	0	0	0	0	0	0	0	0	4.24773e-05	0	0	0	0	0	0	0	0	0	0	0	0	0	0	0	0	0	0	0	0	0	0	0	0	0	0	0	0	0	0	0	0	0	0
OTU_2115	0	0	0	0	0	0	0	0	0	0	0	0	0	0	0	0	0	0	0	0	0	0	0	0	0	0	0	0	0	0	0	0	0	0	0	0	0	0	0	0	0	0	0	0	0	0	0	0	0
OTU_2116	0	0	0	0	0	0	0	0	0	0	0	0	0	0	0	0	0	0	0	0	0	0	0	0	0	0	0	0	0	0	0	0	0	0	4.24773e-05	4.24773e-05	0	0	0	0	0	0	0	0	0	0	0	0	0
OTU_2117	0	0	0	0	0	0	0	0	0	0	0	0	0	0	0	0	0	0	0	0	0	0	0	0	0	0	0	0	0	0	0	0	0	0	0	0	0	0	0	0	0	0	0	0	0	0	0	0	0
OTU_2118	4.24773e-05	0	4.24773e-05	0	4.24773e-05	0	0	0	0	0	0	0	0	0	0	0	0	0	0	0	0	0	0	0	4.24773e-05	0	0	0	0	0	0	0	0	0	0	0	0	0	0	0	0	0	0.000212386	0.000127432	4.24773e-05	4.24773e-05	4.24773e-05	0	0
OTU_2119	4.24773e-05	0	0.000169909	0	0	0	0.000169909	0	0	0	0	0.000127432	8.49545e-05	4.24773e-05	8.49545e-05	0	4.24773e-05	0	0	0	0	0	0	0.000254864	0	0.000212386	0	0.000212386	0	0	4.24773e-05	0	4.24773e-05	0	0	0	4.24773e-05	0	8.49545e-05	8.49545e-05	8.49545e-05	4.24773e-05	0	0	0	0	0	0	0
OTU_212	0	0	0	0	0	0	0	0	0	0	0	0	0	0	0	0	0	0	0	0	0	0	0	0	0	0	0	0	0	0	0	0	0	0	0	0	0	0	0	0	0	0	0	0	0	0	0	0	0
OTU_2120	0	0	0	0	0	0	0	0	0	0	0	0	0	0	0	0	0	0	0	0	0	0	0	0	0	0	0	0	0	0	0	0	0	0	0	0	0	0	0	0	0	0	0	0	0	0	0	0	0
OTU_2121	0	8.49545e-05	0	0	0.000339818	0	0	4.24773e-05	0	0	0	4.24773e-05	0	4.24773e-05	0	0	0	0	0	0	0	0	0	0	0	0	0	0	0	0	4.24773e-05	0	4.24773e-05	0	0	0	0	4.24773e-05	0	0	0	4.24773e-05	0	0	0	0	0	0	0
OTU_2122	0	0	0	0	0	0	0	0	0	0	0	0	0	0	0	0	0	0	0	0	0	0	0	0	4.24773e-05	0	0	0	0	0	0	0	0	0	0	0	0	0	0	0	0	0	0	0.000339818	0	0	0	0	0
OTU_2123	0	0	0	0	0	0	0	0	0	0	0	0	0	0	0	0	0	0	0	0	0	0	0	0	0	0	0	0	0	0	0	0	0	0	0	0	0	0	0	0	0	0	0	0	0	0	0	0	4.24773e-05
OTU_2124	0	0	0	0	0	0	0	0	0	0	0	0	0	0	0	0	0	0	0	0	0	0	0	0	0	0	0	0	0	0	0	0	0	0	0	0	0	0	0	0	0	0	0	0	0	0	0	0	0
OTU_2125	0	0	0	0	0	0	0	0	0	0	0	0	0	0	0	0	0	0	0	0	0	0	0	0	0	0	0	0	0	0	0	0	0	0	0	0	0	0	0	0	0	0	0	0	0	0	0	0	0
OTU_2126	0	0	0	0	0	0	0	0	0	0	0	0	0	0	0	0	0	0	0	0	0	0	0	0	0	0	0	0	0	0	0	0	0	0	0	0	0	0	0	0	0	0	0	0	0	0	0	0	0
OTU_2127	0	0	0	4.24773e-05	0	0	4.24773e-05	0	0	0	0	0	4.24773e-05	0	4.24773e-05	0	4.24773e-05	0	0.000127432	0.000212386	0.000127432	8.49545e-05	0	4.24773e-05	8.49545e-05	8.49545e-05	0	0.000849545	0.000169909	0	4.24773e-05	0	0.000127432	4.24773e-05	4.24773e-05	4.24773e-05	0.000127432	0.000297341	8.49545e-05	8.49545e-05	4.24773e-05	0.000254864	8.49545e-05	0	0	0.000212386	0.000509727	0.000169909	0.000382295
OTU_2128	0	0	0	0	0	0	0	0	0	0	0	0	0	0	0	0	0	0	0	0	0	0	0	0	0	0	0	0	0	0	0	0	0	0	0	0	0.000254864	0	0	0	0	0	0	0	0	8.49545e-05	0	0	0
OTU_2129	0	0	0	0	0	0	0	0	0	0	0	0	0	0	0	0	0	0	0	0	0	0	0	0	0	0	0	0	0	0	0	0	0	0	0	0	0	0	0	0	0	0	0	0	0	0	0	0	0
OTU_213	0	0	0	4.24773e-05	0	0	0	0	0	0	0	0	0	0	0	0	0	0	0	0	4.24773e-05	0	0	0	0	0	0	0	0	0	0	0	0	0	0	0	0	0	0	0	0	0	0	0	0	0	0	0	0
OTU_2130	0	0	0	0	0	0	0	0	0	0	0	0	0	0	0	0	0	0	0	0	0	0	0	0	0	0	0	0	0	0	0	0	0	0	0	0	0	0	0	0	0	0	0	0	0	0	0	0	0
OTU_2131	0	0	0	0	0	0	0	0	0	0	0	0	0	0	0	0	0	0	0	0	0	0	0	0	0	0	0	0	0	0	0	0	0	0	0	0	0	0	0	0	0	0	0	0	0	0	0	0	0
OTU_2132	0	0	0	0	0	0	0	0	0	0	0	0	0	0	0	0	0	0	0	4.24773e-05	0	0	0	0	0	0	0	0	0	0	0	0	0	0	0	0	0	0	0	0	0	0	0	0	0	0	0	0	0
OTU_2133	0	0	0	0	0	0	0	0	0	0	0	0	0	0	0	0	0	0	0	0	0	0	0	0	0	0	0	0	0	0	0	0	0	0	0	0	0	0	0	0	0	0	0	0	0	0	0	0	0
OTU_2134	0	0	0	0	0	0	0	0	0	0	0	0	0	0	0	0	0	0	0	0	0	0	0	0	0	0	0	0	0	0	0	0	0	0	0	0	0	0	0	0	0	0	0	0	8.49545e-05	0	0	0	0
OTU_2135	0	0	0	0	0	0	0	0	0	0	0	0	0	0	0	0	0	0	0	0	0	0	0	0	0	0	0	0	0	0	0	0	0	0	0	0	0	0	0	0	0	0	0	0	0	0	0	0	0
OTU_2136	0	0	0	0	0	0	0	0	0	0	0	0	0	0	0	0	0	0	0	0	0	0	0	0	0	0	0	0	0	0	0	0	0	0	0	0	0	0	0	0	0	0	0	0	0	0	0	0	0
OTU_2137	0	0	0	0	0	0	0	0	0	0	0	0	0	0	0	0	0	0	0	0	0	0	0	0	0	0	0	0	0	0	0	0	0	0	0	0	0	0	0	0	0	0	0	0	0	0	0	0	0
OTU_2138	0	0	0	0	0	0	0	0	0	0	0	0	0	0	0	0	0	0	0	0	0	0	0	0	0	0	0	0	0	0	0	0	0	0	0	0	0	0	0	0	0	0	0	0	0	0	0	0	0
OTU_2139	0	0	0	0	0	0	4.24773e-05	4.24773e-05	0	0	0.000424773	0	4.24773e-05	0	0	0	0	0	0	0	0.000169909	0	0.000127432	0	0.000424773	0	4.24773e-05	0	4.24773e-05	0	0	0.000169909	0	0	0	0	0.000297341	0.000807068	8.49545e-05	0.018775	0.000297341	0.000254864	0	0	0	0	0	0	0
OTU_214	0	0	0	0	0	0	0	0	0	0	0	0	0	0	0	0	0	0	0	0	0	0	0	0	0	0	0	0	0	0	0	0	0	0	0	0	0	0	0	0	0	0	0	0	0	0	0	0	0
OTU_2140	0	0	0	0	0	0	0	0	0	0	0	0	0	0	0	0	0	0	0	0	0	0	0	0	0	0	0	0	0	0	0	0	0	0	0	0	0	0	0	0	0	0	0	0	0	0	0	0	0
OTU_2141	0	0	0	0	0	0	0	0	0	0	0	0	0	0	0	0	0	0	0	0	0	0	0	0	0	0	0	0	0	0	0	0	0	0	0	0	0	0	0	0	0	0	0	0	0	0	0	0	0
OTU_2142	0	0	0	0	0	0	0	0	0	0	0	0	0	0	0	0	0	0	0	4.24773e-05	0	0	0	0	0	0	0	0	0	0	0	0	0	0	0	0	0	0	0	0	0	0	0	0	0	0	0	0	0
OTU_2144	0	0	0	0	0	0	0	0	0	0	0	0	0	0	0	0	0	0	0	0	0	0	0	0	0	0	0	0	0	0	0	0	0	0	0	0	0	0	0	0	0	0	0	0	0	0	0	0	0
OTU_2145	0	0	0	0	0	0	0	0	0	0	4.24773e-05	4.24773e-05	0	0	0	0	4.24773e-05	8.49545e-05	4.24773e-05	0	4.24773e-05	0	0	0	0.000127432	4.24773e-05	8.49545e-05	0.000169909	8.49545e-05	0.000127432	0.0009345	8.49545e-05	8.49545e-05	0	0.000127432	0.000127432	0	4.24773e-05	0	0	4.24773e-05	4.24773e-05	0	0	0	0.000297341	8.49545e-05	0.00195395	0
OTU_2146	0	0	0	0	0	0	0	0	0	0	0	0	0	0	0	0	0	0	0	0	0	0	0	0	0	0	0	0	0	0	0	0	0	0	0	0	0	0	0	0	0	0	0	0	0	0	0	0	0
OTU_2147	0	0	0	0	0	0	0	4.24773e-05	0	0	0	0	0	0	0	0	0	0	0	0	0	0	0	0	0	0	0	0	0	0	0	0	0	0	0	0	0	0	0	0	0	0	0	0	0	0	0	0	0
OTU_2148	0	0	0	0	0	0	0	0	0	0	0	0	0	0	0	0	0	0	0	0	0	0	0	0	0	0	0	0	0	0	0	0	0	0	0	0	0	0	0	0	0	0	0	0	0	0	0	0	0
OTU_2149	0	0	0	0	0	0	0	0	0	0	0	0	0	0	0	0	0	0	0	0	0	0	0	0	0	0	0	0	0	0	0	0	0	0	4.24773e-05	0	0	0	0	0	0	0	0	0	0	0	0	0	0
OTU_215	0	0	0	0	0	0	0	0	0	0	0	0	0	0	0	0	0	0	0	0	0	0	0	0	0	0	0	0	0	0	0	0	0	0	0	0	0	0	0	0	0	0	0	0	0	0	0	0	0
OTU_2150	0	0	0	0	0	0	0	0	0	0	0	0	0	0	0	0	0	0	0	0	0	0	0	0	0	0	0	0	0	0	0	0	0	0	0	0	0	0	0	0	0	0	8.49545e-05	0	0	0	0	0	0
OTU_2151	0	0	0	0	0	0	0	0	0	0	0	0	0	0	0	0	0	0	0	0	0	0	0	0	0	0	0	0	0	0	0	0	0	0	0	0	0	0	0	0	0	0	0	0	0	0	0	0	0
OTU_2152	0	8.49545e-05	4.24773e-05	0	0	0.000254864	0.000212386	0.000382295	4.24773e-05	8.49545e-05	0.000127432	0.000212386	0	0	8.49545e-05	0.000169909	4.24773e-05	0.000127432	4.24773e-05	0	8.49545e-05	0.000254864	0.000212386	4.24773e-05	0.000127432	4.24773e-05	4.24773e-05	0.00135927	0.0013168	0.00144423	0.000679636	0.000807068	0.0013168	8.49545e-05	0	4.24773e-05	0.000169909	0.000212386	0.000169909	8.49545e-05	0.000169909	4.24773e-05	0	0	0	0	4.24773e-05	8.49545e-05	0
OTU_2153	0	0	0	0	0	0	0	0	0	0	0	0	0	0	0	0	0	0	0	0	0	0	0	0	0	0	0	0	0	0	0	0	0	0	0	0	0	0	0	0	0	0	0	0	0	0	0	0	0
OTU_2155	0	0	0	0	0	0	0	0	0	0	0	0	0	0	0	0	0	0	0	4.24773e-05	0	0	0	0	0	0	0	0	0	0	0	0	0	0	0	0	0	0	0	0	0	0	0	4.24773e-05	0	0	0	0	0
OTU_2156	0	0	0	0	0	0	0	0	0	0	0	0	0	0	0	4.24773e-05	0	0	0	0	0	0	0	0	0	0	0	0	0	0	0	0	0	0	0	0	0	0	0	0	0	0	0	0	0	0	0	0	0
OTU_2157	0	0	0	0	0	0	0	0	0	0	0	0	0	0	0	0	0	0	0	0	0	0	0	0	0	0	0	0	0	0	0	0	0	0	0	0	0	0	0	0	0	0	0	0	0	0	0	0	4.24773e-05
OTU_2158	0	0	0	0	0	0	0	0	0	0	0	0	0	0	0	0	0	0	0	0	0	0	0	0	0	0	0	0	0	0	0	0	0	0	0	0	0	0	0	0	0	0	0	0	0	0	0	0	0
OTU_2159	0	0	0	0	0	0	0	0	0	0	0	0	0	0	0	0	0	0	0	0	0	0	0	0	0	0	0	0	0	0	0	0	0	0	0	0	0	0	0	0	0	0	0	0	0	0	0	0	0
OTU_216	0	0	0	0	0	0	0	0	0	0	0	0	0	0	0	0	0	0	0	0	0	0	0	0	0	0	0	0	0	0	0	0	0	0	0	0	0	0	0	0	0	0	0	0	0	0	0	0	0
OTU_2160	0	0	0	0	0	0	0	0	0	0	0	0	0	0	0	0	0	0	0	0	0	0	0	0	0	0	0	0	0	0	0	0	0	0	0	0	0	0	0	0	0	0	8.49545e-05	8.49545e-05	0	0	0	0	0
OTU_2161	0	0	0	0	4.24773e-05	0	0	0	0	0	0	0	0	0	0	0	0	0	0	0	0	0	0	0	0	0	0	0	0	0	0	0	0	0	0	0	0	0	0	0	0	0	0	0	0	0	0	0	0
OTU_2162	0	0	0	4.24773e-05	0	0	0	0	0	0	0	0	0	0	0	0	0	0	0	0	0	0	0	0	0	0	0	0	0	0	0	0	0	0	0	0	0	0	0	0	0	0	0	0	0	0	0	0	0
OTU_2163	0	0	0	0	0	0	0	0	0	0	0	0	0	0	0	0	0	0	0	0	0	0	0	0	0	0	0	0	0	0	0	0	0	0	0	0	0	0	0	0	0	0	0	0	0	0	0	0	0
OTU_2165	0	0	0	0	0	0	0	0	0	0	0	0	0	0	0	0	0	0	0	0	0	0	0	0	0	0	0	0	0	0	0	0	0	0	0	0	0	0	0	0	0	0	0	0	0	0	0	0	0
OTU_2166	4.24773e-05	0	0.000212386	4.24773e-05	0	0.000127432	0	0	0	0	0	0	0	0	0	0	4.24773e-05	8.49545e-05	0	8.49545e-05	0	0	0	0	0	0	0	0	0	0	0	0	0	0	0	0	4.24773e-05	0	0	0	0	0	0	0	0	0	0	0	0
OTU_2168	0	0	0	0	0	0	4.24773e-05	0	0	0	0	0	0	0	0	4.24773e-05	4.24773e-05	0	0	0.000127432	4.24773e-05	4.24773e-05	4.24773e-05	0	4.24773e-05	4.24773e-05	0	0.00118936	0	4.24773e-05	0.000127432	4.24773e-05	0.000297341	4.24773e-05	4.24773e-05	4.24773e-05	4.24773e-05	8.49545e-05	0	4.24773e-05	8.49545e-05	0	0	0	0	4.24773e-05	0	0	0
OTU_2169	0	0	0	0	0	0	0	0	0	0	0	0	0	0	0	0	0	0	0	0	0	0	0	0	0	0	0	0	0	0	0	0	0	0	0	0	0	0	0	0	0	0	0	0	0	0	0	0	0
OTU_217	0	0	0	0	0	0	0	0	0	0	0	0	0	0	0	0	0	0	0	0	0	0	0	0	0	0	0	0	0	0	0	0	0	0	0	0	0	0	0	0	0	0	0.00127432	0.00157166	0	0	0	0	0
OTU_2170	0	0	0	0	0	0	0	0	0	0	0	0	0	0	0	0	0	0	0	0	0	0	0	0	0	0	0	0	0	0	0	0	0	0	0	0	0	0	0	0	0	0	0	0	0	0	0	0	0
OTU_2173	0	0	0	0	0	0	0	0	0	0	0	0	0	0	0	0	0	0	0	0	0	0	0	0	0	0	0	0	0	0	0	0	0	0	0	0	0	0	0	0	0	0	0	0	4.24773e-05	0	0	0	0
OTU_2174	0	0	0	0	0	0	0	0	0	0	0	0	0	0	0	0	0	0	0	0	0	0	0	0	0	0	0	0	0	0	0	0	0	0	0	4.24773e-05	0	0	0	0	0	0	0	0	4.24773e-05	0	0	4.24773e-05	0
OTU_2175	0	0	0	0	4.24773e-05	0	0	0	0	0	0	0	0	0	4.24773e-05	0	0	0	0	0	0	0	0	0	0	0	0	0	0	0	0	0	0	0	0	0	0	0	0	0	0	0	0	0	0	0	0	0	0
OTU_2177	0	0	0	0	4.24773e-05	0	0	0	0	0	0	0	0	0	0	0	0	0	0	0	0	0	0	0	0	0	0	0	0	0	0	0	4.24773e-05	0	0	0	0	0	0	0	0	0	0	0	0	0	0	0	0
OTU_2178	0	0	0	0	0	0	0	0	0	0	0	0	0	0	0	0	0	0	0	0	0	0	0	0	0	0	0	0	0	0	0	0	0	0	0	0	0	0	0	0	0	0	0	0	0	0	0	0	0
OTU_2179	0	0	0	0	0	4.24773e-05	0	0	0	0	0	0	0	4.24773e-05	8.49545e-05	0	0	0	0	0	0	0	0	0	0	0	0	0	0	0	0	0	0	0	0	0	0	0	0	0	0	0	0	0	0	0	0	0	0
OTU_218	0	0	0	0.000254864	0	0	0	0	4.24773e-05	0	4.24773e-05	0	0	0	0	0	0	0	0	0	0	0	0	0	0	0	0	0	0	0	0	0	0	0	0	0	0	0	0	8.49545e-05	0	0	0	0	0	0	0	0	0
OTU_2180	0	0	0	0	0	0	0	0	0	0	0	0	0	0	0	0	0	0	0	0	0	0	0	0	0	0	0	0	0	0	0	0	0	0	0	0	0	0	0	0	0	0	0	0	0	0	0	0	0
OTU_2181	0	0	0	0	0	0	0	0	0	0	0	0	0	0	0	0	0	0	0	0	0	0	0	0	0	0	0	0	0	0	0	0	0	0	0	0	0	0	0	0	0	0	4.24773e-05	4.24773e-05	8.49545e-05	0	0	0	0
OTU_2182	0	0	0	0	0	0	0	0	0	0	0	0	0	0	0	0	0	0	0	0	0	0	0	0	0	0	0	0	0	0	0	0	0	0	0	0	0	0	0	0	0	0	0	0	0	0	0	0	0
OTU_2183	0	0	0	0	0	0	0	0	0	0	0	0	0	0	0	0	0	0	0	0	0	0	0	0	0	0	0	0	0	0	0	0	0	0	0	0	0	0	0	0	0	0	0	0	0	0	0	0	0
OTU_2184	0	0	0	0	0	4.24773e-05	0	0	0	0	0	0	0	0	0	0	0	0	0	0	0	0	0	0	0	0	0	0	0	4.24773e-05	0	0	0	0	0	0	0	0	0	0	0	0	0	0	0	0	0	0	0
OTU_2185	0	0	0	0	0	0	0	0	0	0	0	0	0	0	0	0	0	0	0	0	0	0	0	0	0	0	0	0	0	0	0	0	0	0	0	0	0	0	0	0	0	0	0.000339818	0	0	0	0	0	0
OTU_2186	0	0	0	0	0	0	0	0	0	0	0	0	0	0	0	0	0	0	0	0	0	0	0	0	0	0	0	0	0	0	0	0	0	0	0	0	0	0	0	0	0	0	0	0	0	0	0	0	0
OTU_2187	0	0	0	0	0	0	0	0	0	0	0	0	0	0	0	0	0	0	0	0	0	0	0	4.24773e-05	0	0	0	8.49545e-05	0.000212386	4.24773e-05	0	0.000169909	8.49545e-05	0	0	0	0	0	0	0	0	0	0	0	0	0	0	0	0
OTU_2188	0	0	0	0	0	0	0	0	0	0	0	0	0	0	0	0	0	0	0	0	4.24773e-05	0	0	0	0	0	0	0	0	0	0	0	0	0	0	0	0	0	0	0	0	0	4.24773e-05	0	0.000339818	0.000509727	0.000509727	0.000339818	0
OTU_2189	0	0	0	0	0	0	0	0	0	0	0	0	0	0	0	0	0	0	0	0	0	0	0	0	0	0	0	0	0	0	0	0	0	0	0	0	0	0	0	0	0	0	4.24773e-05	0.000254864	0.000127432	4.24773e-05	0	0	0
OTU_219	0	0	0	0	0	0	0	0	0	0	0	0	0	0	0	0	0	0	0	0	0	0	0	0	0	0	0	0	0	0	0	0	0	0	0	0	0	0	0	0	0	0	0	0	0	0	0	0	0
OTU_2190	0	0	0	0	0	0	0	0	0	0	0	0	0	0	0	0	0	0	0	0	0	0	0	0	0	0	0	0	0	0	0	0	0	0	0	0	0	0	0	0	0	0	0	0	0	0	0	0	0
OTU_2191	0	0	0	0	0	0	0	0	0	0	0	0	0	0	0	0	0	0	0	0	0	0	0	0	0	0	0	0	0	0	0	0	0	0	0	0	0	0	0	0	0	0	0	0	0	0	0	0	0
OTU_2192	0	0	0	0.000382295	4.24773e-05	0	0	0	0.000127432	0	0	0	0	0	0	0	0	0	0	0	0	4.24773e-05	0	4.24773e-05	0	0	0	4.24773e-05	0	0	0	0	0	0	0	0	0	4.24773e-05	4.24773e-05	0	0	0	0	0	0	0	0	0	0.000127432
OTU_2193	0	0	0	0	0	0	0	0	0	0	0	0	0	0	0	0	0	0	0	0	0	0	0	0	0	0	0	0	0	0	0	0	0	0	0	0	0	0	0	0	0	0	0	0	0	0	0	0	0
OTU_2194	0	0	0	0	0	0	0	0	0	0	0	0	0	0	0	0	0	0	0	0	0	0	0	0	0	0	0	0	0	0	0	0	0	0	0	0	0	0	0	0	0	0	0	0	0	0	0	0	0
OTU_2195	0	0	0	0	0	0	0	0	0	0	0	0	0	0	4.24773e-05	0	0	0	0	0	0	0	0	0	0	0	0	0	0	0	0	0	0	0	0	0	0	0	0	0	0	0	0	0	0	0	0	0	0
OTU_2196	0	0	0	0	0	0	0	0	0	0	0	4.24773e-05	4.24773e-05	0	0	0	4.24773e-05	0	0	4.24773e-05	0	0	0	0	0	0	0	4.24773e-05	4.24773e-05	0	4.24773e-05	0	4.24773e-05	0	4.24773e-05	4.24773e-05	0	4.24773e-05	4.24773e-05	0	8.49545e-05	4.24773e-05	0	4.24773e-05	0	0.000127432	0.000127432	0.000212386	0
OTU_2197	0	0	0	0	0	0	0	0	0	0	0	0	0	0	0	0	0	4.24773e-05	0	0	0	0	0	0	0	0	0	0	0	0	0	4.24773e-05	0	0	0	0	0	0	0	0	0	0	0	0	0	0	0	0	0
OTU_2198	0.000127432	0	4.24773e-05	0	4.24773e-05	8.49545e-05	4.24773e-05	8.49545e-05	4.24773e-05	0.000297341	0.000127432	8.49545e-05	0.000127432	0	0	8.49545e-05	0.000127432	4.24773e-05	0.000892023	0.00135927	0.00106193	0.000297341	0.000382295	0.000127432	0.0629513	0.0014867	0.00441764	0.00267607	0.005607	0.00212386	0.0323252	0.00369552	0.00169909	0.00046725	0	0.000169909	0.000127432	0.000297341	0.00127432	8.49545e-05	4.24773e-05	4.24773e-05	0.000722114	8.49545e-05	0.00781582	0.00208139	0.00169909	0.00152918	8.49545e-05
OTU_2199	0	0	0	0	0	0	0	0	0	0	0	0	0	0	0	0	0	0	0	0	0	0	0	0	0	0	0	0	0	0	0	0	0	0	0	0	0	0	0	0	0	0	0	0	0	0	0	0	0
OTU_22	0	0	0	0	0	0	0	0	0	0	0	0	0	0	0	0	0	0	0	0	0	0	0	0	0	0	0	0	0	0	0	0	0	0	0	0	0	0	0	0	0	0	0	0	0	0	0	0	0
OTU_220	0	0	0	0	0	0	0	0	0	0	0	0	0	0	0	0	0	0	0	0	0	0	0	0	0	0	0	0	0	0	0	0	0	0	0	0	0	0	0	0	0	0	0	0	0	0	0	0	0
OTU_2200	0	0	0	0	0	0	0	0	0	0	0	0	0	0	0	0	0.000127432	0	4.24773e-05	8.49545e-05	0	0	0	0	0	0	0	0	0	0	0	0	0	0	0	0	0	0	0	0	0	0	0	0.000297341	0	0	0	4.24773e-05	0
OTU_2201	0	0	0	0	0	0	0	0	0	0	0	0	0	0	0	0	0	0	0	0	0	0	0	0	0	0	0	0	0	0	0	0	0	0	0	0	0	0	0	0	0	0	0	0	0	0	0	0	0
OTU_2202	0	0	0	0	0	0	0	0	0	0	0	0	0	0	0	0	0	0	0	0	0	0	0	0	0	0	0	0	0	0	0	0	0	0	0	0	0	0	0	0	0	0	0	0	0	0	0	0	0
OTU_2203	0	0	0	0	0	0	0	0	0	0	0	0	0	0	0	0	0	0	0	0	0	0	0	0	0	0	0	0	0	0	0	0	0	0	0	0	0	0	0	0	0	0	8.49545e-05	8.49545e-05	8.49545e-05	4.24773e-05	0	0	0
OTU_2204	0	0	0	0	0	0	0	0	0	0	0	0	0	0	0	0	0	0	0	0	0	0	0	0	0	0	0	0	0	0	0	0	0	0	0	0	0	0	0	0	0	0	0	0	0	0	0	0	0
OTU_2205	0	0	0	0	0	0	0	0	0	0	0	0	0	0	0	0	0	0	0	0	0	0	0	0	0	0	0	0	0	0	0	0	0	0	0	0	0	0	0	0	0	0	0	0	0	0	0	0	0
OTU_2206	0	0	0	0	0	0	0	0	0	0	0	0	0	0	0	0	0	0	0	0	0	0	0	0	0	0	0	0	0	0	0	0	0	0	0	0	0	0	0	0	0	0	0	0	0	0	0	0	0
OTU_2207	0	0	0	0	0	0	0	0	0	0	0	0	0	0	0	0	0	0	0	0	0	0	0	0	0	0	0	0	0	0	0	0	0	0	0	0	0	0	0	0	0	0	0.000254864	0	0	0	0	0	0
OTU_2208	0	0	0	0	0	0	0	0	0	0	0	0	0	0	0	0	0	0	0	0	0	0	0	0	0	0	0	0	0	0	0	0	0	0	0	0	0	0	0	0	0	0	0	0	0	0	0	0	0
OTU_2209	0	0	0	0	0	0	0	0	0	0.000127432	0	0	0	0	0	0	0	0	0	4.24773e-05	4.24773e-05	0	0	0	4.24773e-05	0	0.000169909	0	8.49545e-05	0	8.49545e-05	0	0	0	4.24773e-05	4.24773e-05	0	0	0	0	0	0	4.24773e-05	4.24773e-05	4.24773e-05	0.00046725	0.000594682	0.000212386	4.24773e-05
OTU_221	0	0	0	0	0	0	0	0	0	0	0	0	0	0	0	0	0	0	0	0	0	0	0	0	0	0	0	0	0	0	0	0	0	0	0	0	0	0	0	0	0	0	0	8.49545e-05	0	0	0	0	0
OTU_2210	0	0	0	0	0	0	0	0	0	0	4.24773e-05	0	0	0	0	0	0	0	0	0	0	0	0	0	0	0	0	0	0	0	0	0	0	0	0	0	0	0	0	0	0	0	0	4.24773e-05	0	0	0	0	0
OTU_2211	0	0	0	0	0	0	0	0	0	0	0	0	0	0	0	0	0	0	0	0	0	0	0	0	0	0	0	0	0	0	0	0	0	0	0	0	0	0	0	0	0	0	0	0	0	0	0	0	0
OTU_2212	0	0	0	0	0	0	0	0	0	0	0	0	0	0	0	0	0	0	0	0	0	0	0	0	0	0	0	0	0	0	0	0	0	0	0	0	0	0	0	0	0	0	0	0.000127432	0	0	0	0	0
OTU_2213	0	0	0	0	0	0	0	0	0	4.24773e-05	0	0	0	0	0	0	0	0	0	0	0	0	0	0	0	0	0	0	0	0	0	0	0	0	0	0	0	0	0	0	0	0	0	0	0	0	0	0	0
OTU_2214	0	0	0	8.49545e-05	0	0	0	0	0	0	0	0	0	0	0	0	0	0	0	0	0	4.24773e-05	0	0	0	0	0	0	0	0	0	0	0	0	0	0	0	0	0	0	0	0	0	0	0	0	0	0	0
OTU_2215	0	0	0	0	0	0	0	0	0	0	0	0	0	0	0	0	0	0	0	0	0	0	0	0	0	0	0	0	0	0	0	0	0	0	0	0	0	0	0	0	0	0	0	0	4.24773e-05	0	0	0	0
OTU_2216	0	0	0	0	0	0	0	0	0	8.49545e-05	0.000169909	0	0	0	4.24773e-05	0	0	0	0	0	0	0	0	0	0	0	4.24773e-05	0	0	0	0	0	0	0	0	0	0	0	0	0	0	0	8.49545e-05	0	0	0	0	4.24773e-05	0
OTU_2217	0	0	0	0	0	0	0	0	0	0	0	0	0	0	0	0	0	0	0	0	0	0	0	0	0	0	0	0	0	0	0	0	0	0	0	0	0	0	0	0	0	0	0	0	0	0	0	0	0
OTU_2218	0	0	0	0	0	0	0	0	0	0	0	0	0	0	0	0	0	0	0	0	0	0	0	0	0	0	0	0	0	0	0	0	0	0	0	0	0	0	0	0	0	0	0	0	0	0	0	0	0
OTU_2219	0	0	0	0	0	0	0	0	0	0	0	0	0	0	0	0	0	0	0	0	0	0	0	0	0	0	0	0	0	0	0	0	0	0	0	0	0	0	0	0	0	0	0	0	0	0	0	0	0
OTU_222	0	0	0	0	0	0	0	0	0	0	0	0	0	0	0	0	0	0	0	0	0	0	0	0	0	0	0	0	0	0	0	0	0	0	0	0	0	0	0	0	0	0	0	0	0	0	0	0	0
OTU_2220	0	0	0	0	0	0	0	0	0	0	0	0	0	0	0	0	0	0	0	0	0	0	0	0	0	0	0	0	0	0	0	0	0	0	0	0	0	0	0	0	0	0	0	0	0	0	0	0	0
OTU_2221	0	0	0	0	0	0	0	0	0	0	0	0	0	0	0	0	0	0	0	0	0	0	0	0	0	0	0	0	0	0	0	0	0	0	0	0	0	0	0	0	0	0	4.24773e-05	8.49545e-05	0.000127432	0	0	0	0
OTU_2223	0	0	0	0	0	0	0	0	0	0	0	0	0	0	0	0	0	0	0	0	0	0	0	0	0	0	0	0	0	0	0	0	0	4.24773e-05	0	0	0	0	0	0	0	0	0	0	0	0	0	0	0
OTU_2224	0	0	0	0	0	0	0	0	0	0	0	0	0	0	0	0	0	0	0	0	0	0	0	0	0	0	0	0	0	0	0	0	0	0	0	0	0	0	0	0	0	0	0	0	0	0	0	0	0
OTU_2225	0	0	0	0	0	0	0	0	0	0	0	0	0	0	0	0	0	0	0	0	0	0	0	0	0	0	0	0	0	0	0	0	0	0	0	0	0	0	0	0	0	0	0	0	0	0	0	0	0
OTU_2226	0	0	0	0	0	0	0	4.24773e-05	0	0	0	0	0	0	0	0	0	0	4.24773e-05	0	0	0	0	0	8.49545e-05	0	4.24773e-05	4.24773e-05	4.24773e-05	0	0	0	0	0	0	0	0	0	0	0	0	0	0	0	0	4.24773e-05	8.49545e-05	0	0
OTU_2227	0	8.49545e-05	0	0	0	0	0	0	0	0	0	4.24773e-05	0	0	4.24773e-05	0	0	0	4.24773e-05	0	0.000127432	0	8.49545e-05	0.000127432	0	0	4.24773e-05	0.000594682	4.24773e-05	0.000169909	0.000382295	0.000169909	0.000212386	0	4.24773e-05	4.24773e-05	0	0	4.24773e-05	0	0	0	0	0	0	0.000254864	0	0.000254864	4.24773e-05
OTU_2229	0	0	0	0	0	0	0	0	0	0	0	0	0	0	0	0	0	0	0	0	0	4.24773e-05	0	4.24773e-05	4.24773e-05	0	0	0	0	0	0	0	0	4.24773e-05	0	0	0	4.24773e-05	0	4.24773e-05	0	0	0	0	0	0	0	0	0.000212386
OTU_223	0	0	0	0	0	0	0	0	0	0	0	0	0	0	0	0	0	0	0	0	0	0	0	0	0	0	0	0	0	0	0	0	0	0	0	0	0	0	0	0	0	0	0	0	0	0	0	0	0
OTU_2230	0	0	0	0	0	0	0	0	0	0	0	0	0	0	0	0	0	0	0	0	0	0	0	0	0	0	0	0	0	0	0	0	0	0	0	0	0	0	0	0	0	0	8.49545e-05	0	0	0	0	0	0
OTU_2231	0	0	0	0	0	0	0	0	0	0	0	0	0	0	0	0	0	0	0	0	0	0	0	0	0	0	0	0	0	0	0	0	0	0	0	0	0	0	0	0	0	0	0	0	0	0	0	0	0
OTU_2232	0	0.000254864	0	8.49545e-05	0	0	0	0	0.000552205	8.49545e-05	0	0	0	0	4.24773e-05	0	0	0	4.24773e-05	8.49545e-05	8.49545e-05	0	4.24773e-05	0	8.49545e-05	0	0	4.24773e-05	0	4.24773e-05	0	0	4.24773e-05	0	4.24773e-05	4.24773e-05	0.000637159	0.000679636	8.49545e-05	0.000424773	8.49545e-05	0.000297341	0	0.000169909	0.000169909	0.000509727	0.000127432	0.000127432	0.000254864
OTU_2235	0	0	0	0	0	0	0	0	0	0	0	0	0	0	0	0	0	0	0	0	0	0	0	0	0	0	0	0	0	0	0	0	0	0	0	0	0	0	0	0	0	0	0	0	4.24773e-05	0	0	4.24773e-05	0
OTU_2236	0	0	0	0	0	0	0	0	0	0	0	0	0	0	0	0	0	0	0	0	0	0	0	0	0	0	0	8.49545e-05	0	4.24773e-05	0	4.24773e-05	0	0	0	0	0	0	0	0	0	0	0	0	0	0	0	0	0
OTU_2237	0	0	0	0	0	0	0	0	0	0	0	0	0	0	0	0	0	0	4.24773e-05	4.24773e-05	4.24773e-05	0.000127432	0.000127432	0	4.24773e-05	4.24773e-05	8.49545e-05	0.00101945	0.00046725	0.000382295	4.24773e-05	0.000169909	0.000127432	0	0	0	4.24773e-05	0.000212386	4.24773e-05	4.24773e-05	0	0.000127432	0	0	4.24773e-05	8.49545e-05	4.24773e-05	4.24773e-05	4.24773e-05
OTU_2238	0	0	0	0	0	0	0	0	0	0	0	0	0	0	0	0	0	0	0	0	0	0	0	0	0	0	0	0	4.24773e-05	0	0	0	0	0	0	4.24773e-05	0	0	0	0	0	0	0.000212386	0	0	0	4.24773e-05	0	0
OTU_2239	0	0	0	0	0	0	0	0	0	0	0	0	0	0	0	0	0	0	0	0	0	0	0	0	0	0	0	0	0	0	0	0	0	0	0	0	0	0	0	0	0	0	0	0	0	0	0	0	0
OTU_2240	0	0	0	0	0	0	0	0	0	0	0	0	0	0	0	0	0	0	0	0	0	0	0	0	0	0	0	0	0	0	0	0	0	0	0	0	0	0	0	0	0	0	0	0	0	0	0	0	0
OTU_2241	0	0	0	0	0	0	0	0	0	0	0	0	0	0	0	0	0	0	0	0	0	0	0	0	0	0	0	0	0	0	0	0	0	0	0	0	0	0	0	0	0	0	0	8.49545e-05	0	0	0	0	0
OTU_2242	0	0	0	0.000424773	0	0	0	0	0	0	0	0	0	0	0	4.24773e-05	0	0	0	0	0	0	4.24773e-05	4.24773e-05	0	0	0	8.49545e-05	0	0	4.24773e-05	0	0	0	0	0	0	0	4.24773e-05	0	8.49545e-05	0	0	0	0	0	0	0	0
OTU_2243	0	0	0	0	0	0	0	0	0	0	0	0	0	0	0	0	0	0	0	0	0	0	0	0	0	0	0	0	0	0	0	0	0	0	0	0	0	0	0	0	0	0	0	0	0	0	0	0	0
OTU_2244	0	0	0	0	0	0	0	0	0	0	0	0	0	0	0	0	0	0	0	0	0	0	0	0	0	0	0	0	0	0	0	0	0	0	0	0	0	0	0	0	0	0	0	0	0	0	0	0	0
OTU_2245	0	0	0	0	0	0	0	0	0	0	0	4.24773e-05	0	0	0	0	0	0	0	0	0	0	0	0	0	0	0	0	0	0	0	0	0	0	0	0	0	0	0	0	0	0	0	0	0	0	0	0	0
OTU_2246	8.49545e-05	0	0	0	0	0	0	0	0	0	0	0	0	0.000127432	0	0	0	0	0	0	0	0	0	0	0	0	0	0	0	0	0	0	0	0	0	0	0	0	0	0	0	4.24773e-05	0	0	0	0	0	0	0
OTU_2247	0	0	0	0	0	0	0	0	0	0	0	0	0	0	0	0	0	0	0	0	0	0	0	0	4.24773e-05	0	0	0	0	0	0	0	0	0	0	0	0	0	0	0	0	0	0	0	0	0	0	0	0
OTU_2248	0	0	0	0	0	0	0	0	0	0	0	0	0	0	0	0	0	0	0	0	0	0	0	0	0	0	0	0	0	0	0	0	0	0	0	0	0	0	0	0	0	0	0	0	0	0	0	0	0
OTU_2249	0	0	0	0	0	0	0	4.24773e-05	0	0	0	0	0	0	0	0	0	0	0	0	0	0	0	0	0	0	0	0	0	0	0	0	0	0	0	0	0	0	0	0	0	0	0	0	0	0	0	0	8.49545e-05
OTU_225	0	0	0	0	0	0	0	0	0	0	0	0	0	0	0	0	0	0	0	0	0	0	0	0	0	0	0	0	0	0	0	0	0	0	0	0	0	0	0	0	0	0	0	0	0	0	0	0	0
OTU_2250	0	0	0	0	0	0	0	0	0	0	0	0	0	0	0	0	0	0	0	0	0	0	0	0	0	0	0	0	0	0	0	0	0	0	0	0	0	0	0	0	0	0	0	0	0	0	0	0	0
OTU_2251	0.00220882	0.00161414	0.00250616	0.00679636	0.000297341	0.00641407	0.00488489	0.00441764	0.257625	0.000424773	0.000892023	0.000849545	0.00322827	0.0033557	0.00403534	0.00530966	0.00208139	0.00386543	0.0973579	0.013168	0.0537338	0.0024212	0.00331323	0.00191148	0.00212386	0.0013168	0.00348314	0.000807068	0.0123609	0.089797	0.00191148	0.00496984	0.00144423	0.000849545	0.000976977	0.000807068	0.00195395	0.000339818	0.0014867	0.000849545	0.000849545	0.00178405	0.0341517	0.000509727	8.49545e-05	0.00191148	0.000764591	0.000679636	0.000127432
OTU_2252	0	0	0	0	0	0	0	0	0	0	0	0	0	0	0	0	0	0	0	0	0	0	0	0	0	0	0	0	0	0	0	0	0	0	0	0	0	0	0	0	0	0	0	0	0	0	0	0	0
OTU_2253	0	0	0	0	0	0	0	0	0	0	0	0	0	0	0	0	0	0	0	0	0	0	0	0	0	0	0	0	0	0	0	0	0	0	0	0	0	0	0	0	0	0	0	0	0	0	0	0	0
OTU_2254	0	0	0	0	0	0	0	0	0	0	0	0	0	0	0	0	0	0	0	0	0	0	0	0	0	0	4.24773e-05	0	0	0	0	0	0	0	0	0	0	0	0	0	0	0	0	0	4.24773e-05	0	0	0	0
OTU_2255	0	0	0	0	0	0	0	0	0	0	0	0	0	0	0	0	0	0	0	0	0	0	0	0	0	0	0	0	0	0	0	0	0	0	0	0	0	0	0	0	0	0	0	0	0	0	0	0	0
OTU_2256	4.24773e-05	4.24773e-05	0.00114689	0.00246368	4.24773e-05	8.49545e-05	0.00123184	0.00259111	0.0014867	0.00288845	8.49545e-05	0.00310084	0.00407782	8.49545e-05	0.00114689	4.24773e-05	0	0.00344066	4.24773e-05	0.000127432	0.000127432	0.00212386	4.24773e-05	0.00220882	0.00140175	0.0009345	0	0.00165661	4.24773e-05	4.24773e-05	0.00208139	0.000127432	0	0.000424773	4.24773e-05	0	0	0.00203891	0.00263359	0.000127432	0.00220882	8.49545e-05	0.036403	0.20062	0.035511	0.00361057	0.00416277	0.0143148	0.442528
OTU_2257	0	0	0	0	0	0	0	0	0	0	0	0	0	0	0	0	0	0	0	0	0	0	0	0	0	0	0	0	0	0	0	0	0	0	0	0	0	0	0	0	0	0	0.000212386	4.24773e-05	4.24773e-05	0	0	0	0
OTU_2258	0	0	0	0	0	0	0	0	0	0	0	0	0	0	0	0	0	0	0	0	0	0	0	0	0	0	0	0	0	0	0	0	0	0	0	0	0	0	0	0	0	0	0.000212386	0	4.24773e-05	0	0	0	0
OTU_2259	0	0	0	0	0	0	0	0	0	0	0	0	0	0	0	0	0	0	0	0	0.000212386	0	0	0	4.24773e-05	0	0	0	0.000169909	0	0	0	0	0	4.24773e-05	0.000127432	0	0	0	0	0	0	0.0113414	0.0180528	0.0253589	0.0104494	0.00875032	0.0216209	0
OTU_226	0	0	0	0	0	0	0	0	0	0	0	0	0	0	0	0	0	0	0	0	0	0	0	0	0	0	0	0	0	0	0	0	0	0	0	0	0	0	0	0	0	0	0	0	0	0	0	0	0
OTU_2260	0	0	0	0	0	0	0	0	0	4.24773e-05	4.24773e-05	0	4.24773e-05	0	0	0	0	0	0	0	0	0	0	0	0	0	0	0	0	0	0	0	0	0	0	0	0	0	0	0	0	0	0	0	0	0	0	0	0
OTU_2261	0	0	0	0	0	0	0	0	0	0	0	0	0	0	0	0	0	0	0	0	0	0	0	0	0	0	0	0	0	0	0	0	0	0	0	0	0	0	0	0	0	0	0	0	0	0	0	0	0
OTU_2262	0	0	0	0	0	0	0	0	0	0	0	0	0	0	0	0	0	0	0	0	0	0	0	0	0	0	0	0	0	0	0	0	0	0	0	0	0	0	0	0	0	0	0	0	0	0	0	0	0
OTU_2263	0	0	0	0	0	0	0	0	0	0	0	0	0	0	0	0	0	0	0	0	0	0	0	0	0	0	0	0	0	0	0	0	0	0	0	0	0	0	0	0	0	0	0	0	0	0	0	0	0
OTU_2264	0	0	0	0	0	0	0	0	0	0	0	0	0	0	0	0	0	0	0	0	0	0	0	0	0	0	0	0	0	0	0	0	0	0	0	0	0	0	0	0	0	0	0	0	0	0	0	0	0
OTU_2265	0	0	0	0	0	0	0	0	0	0	0	0	0	0	0	0	0	0	0	0	0	0	0	0	0	4.24773e-05	0	4.24773e-05	0	0	0	0	4.24773e-05	0	4.24773e-05	0	0	0	0	0	0	0	0	0	0	0	0	0	0
OTU_2266	0	0	0	0	0	0	0	0	0	0	0.000169909	0	0	0	0	0	0	0	0	0	0	0	0	0	0	0	0	0	0	0	0	0	0	0	0	0	0	0	0	0	0	0	0	0	0	0	0	0	0
OTU_2267	0	0	0	0	0	0	0	0	0	0	0	0	0	0	0	0	0	0	0	0	0	0	0	0	0	0	0	0	0	0	0	0	0	0	0	0	0	0	0	0	0	0	0	0	0	0	0	0	0
OTU_2268	0	0	0	0	0	0	0	0	0	0	0	0	0	0	0	0	0	0	0	0	0	0	0	0	0	0	0	0	0	0	0	0	0	0	0	0	0	0	0	0	0	0	0	0	0	0	0	0	0
OTU_2269	0	0	0	0	0	0	0	0	0	0	0	0	0	4.24773e-05	0	0	0	0	0	0	0	0	0	0	0	0	0	0	0	0	0	0	0	0	0	0	0	0	0	0	0	0	0	0	0	0	0	0	0
OTU_227	0	0	0	0	0	0	0	0	0	0	0	0	0	0	0	0	0	0	0	0	0	0	0	0	0	0	0	0	0	0	0	0	0	0	0	0	0	0	0	0	0	0	0	4.24773e-05	0	0	0	0	0
OTU_2270	4.24773e-05	0	8.49545e-05	8.49545e-05	0	0	0	0	0	0	0	0	0	0	0	4.24773e-05	8.49545e-05	0	4.24773e-05	4.24773e-05	0	0	0	0	8.49545e-05	0	0	0	0	0	0	0	0	0	0	0	0	0	0	0	0	0	0.00106193	0	0	8.49545e-05	0.000297341	0	0.000127432
OTU_2271	0	0	0.000212386	8.49545e-05	4.24773e-05	8.49545e-05	4.24773e-05	0	4.24773e-05	0	0	0	0	0	0	4.24773e-05	0	0	0	4.24773e-05	0	0	0	0	0	0	4.24773e-05	0	0	8.49545e-05	0	0	0	0	0	0	8.49545e-05	0	0	0	0	0	0	0.000169909	0	0	0	0	0
OTU_2272	0	0	0	0	0	0	0	0	0	0	0	0	0	0	0	0	0	0	0	0	0	0	0	0	0	0	0	0	0	0	0	0	0	0	0	0	0	0	0	0	0	0	0	4.24773e-05	0	0	0	0	0
OTU_2273	0	0	0	0	0	0	0	0	0	0	0	0	0	0	0	0	0	0	0	0	0	0	0	0	0	0	0	0	0	0	0	0	0	0	0	0	0	0	0	0	0	0	0	0	8.49545e-05	0	0	0	0
OTU_2275	0	0	0	0	0	0	0	0	0	0	0	0	0	0	0	0	0	0	0	0	0	0	0	0	0	0	0	0	0	0	0	0	0	0	0	0	0	0	0	0	0	0	0	0	0	0	0	0	0
OTU_2277	8.49545e-05	8.49545e-05	0.000764591	0.000637159	8.49545e-05	0.000339818	0.000339818	0	0.000892023	0.000552205	0.000254864	0.000339818	0	4.24773e-05	4.24773e-05	0.000339818	0.000679636	0.000509727	0.000212386	0.0022513	0.000339818	0.00135927	0	0.000127432	0.00046725	8.49545e-05	0.000382295	4.24773e-05	0.000382295	0.000254864	0	0	0	0.000212386	0.000339818	0.000764591	0.000127432	4.24773e-05	0	0	0	4.24773e-05	0.000254864	0.000382295	0.000127432	0.000764591	0.00114689	0.000764591	0
OTU_2278	0	0	0	0	0	0	0	0	0	4.24773e-05	0	0	0	0	0	0	0	0	0	0	0	0	0	0	0	0	0	0	0	0	0	0	0	0	0	0	0	0	0	0	0	0	0.00284598	0.00603177	0.00794325	0.000254864	0.000127432	4.24773e-05	0
OTU_2279	0	0	0	4.24773e-05	0	0	0	4.24773e-05	4.24773e-05	0	0	0	0	0	0	0	0	0	0	0	8.49545e-05	0	0	0	0	0	0	4.24773e-05	4.24773e-05	0	0	0	0	0	0	0	0	0	0	0	0	0	0.000764591	0.00157166	0.00229377	0.00471498	0.00552205	0.00798573	0
OTU_228	0	0	0	0	0	0	0	0	0	0	0	0	0	0	0	0	0	0	0	0	0	0	0	0	0	0	0	0	0	0	0	0	0	0	0	0	0	0	0	0	0	0	0	0	0	0	0	0	0
OTU_2280	0	0	0	0	0	0	0	0	0	0	0	0	0	0	0	0	0	0	0	0	0	0	0	0	0	0	0	0	0	0	0	0	0	0	0	0	0	0	0	0	0	0	0	0	0	0	0	0	0
OTU_2281	0	0	0	0	0	0	0	0	0	0	0	0	0	0	0	0	0	0	0	0	0	0	0	0	0	0	0	0	0	0	0	0	0	0	4.24773e-05	0	0	0	0	0	0	0	0	0	0.000127432	0	0	0	0
OTU_2282	0	0	0	0	0	0	0	0	0	0	0	0	0	0	0	0	0	0	0	0	0	0	0	0	0	0	0	0	0	0	0	0	0	0	0	0	0	0	0	0	0	0	0	0	0	0	0	0	0
OTU_2284	0	0	0	0	0	0	0	0	0	0	0	0	0	0	0	0	0	0	0	0	0	0	0	0	0	0	0	0	0	0	0	0	0	0	0	0	0	0	0	0	0	0	0	0	0	0	0	0	0
OTU_2285	8.49545e-05	0	0.000127432	8.49545e-05	0	0	0.000212386	0.000552205	4.24773e-05	0.000509727	0.000212386	8.49545e-05	0	8.49545e-05	8.49545e-05	0	0	0	0	0	0	0.000594682	0.000254864	0.000127432	0	0.000169909	0	4.24773e-05	0	0	0.000212386	8.49545e-05	4.24773e-05	0.000127432	0	0	0	0.000552205	8.49545e-05	0.000212386	0.000127432	8.49545e-05	0	0	0	0	0	0	0.000169909
OTU_2286	0	0	0	0	0	0	0	0	0	0	0	0	0	0	0	0	0	0	0	0	4.24773e-05	0	0	0	0	0	0	0	0	0	0	0	0	0	0	0	0	0	0	0	0	0	0	0	0	0	0	0	0
OTU_2287	0	0	0	0	0	0	0	0	0	0	0	0	0	0	0	0	0	0	0	0	0	0	0	0	0	0	0	0	0	0	0	0	0	0	0	0	0	0	0	0	0	0	0	0	0	0	0	0	0
OTU_229	0	0	0	0	0	0	0	0	0	0	0	0	0	0	0	0	0	0	0	0	0	0	0	0	0	0	0	0	0	0	0	0	0	0	0	0	0	0	0	0	0	0	0	0	0	0	0	0	0
OTU_2291	0	0	0	0.000127432	0	0	0	0.000254864	4.24773e-05	0.000297341	4.24773e-05	0.000127432	0.000297341	0	0	4.24773e-05	0	0	0	0	0	0.000509727	0	0.000212386	0	0	0	0.000297341	0.000127432	0.000169909	0.000976977	0	0	4.24773e-05	0	0	0	0.00288845	0.000127432	0	0.000127432	0	0	0	0.000212386	0.00118936	0.000339818	0.000509727	0.000722114
OTU_2292	0	0	0	0	0	0	0	0	0	0	0	0	0	8.49545e-05	0	0	0	0	0	0	0	0	0	0	0	0	0	0	0	0	0	0	0	0	0	0	0	0	0	0	0	0	0	0	0	0	0	0	0
OTU_2294	0	0	0	0	0	0	0	0	0	0	0	0	0	0	0	0	4.24773e-05	0	0	4.24773e-05	4.24773e-05	8.49545e-05	0	0	0	0	0	0.000594682	0	4.24773e-05	0.000127432	4.24773e-05	0.000212386	0	0	0	0	0	0	0	0	4.24773e-05	0	0	0	4.24773e-05	4.24773e-05	0	0
OTU_2295	0	0	0	0	0	0	0	0	0	0	0	0	0	0	0	0	0	0	0	0	8.49545e-05	0	0	0	0	0	0	0	0	0	0	0	0	4.24773e-05	0	0	0	0	0	0	0	0	0.000212386	4.24773e-05	0	0	0	0	0
OTU_2296	0	0	0	0	0	0	0	0	0	0	0	0	4.24773e-05	0	0	0	0	0	0	0	0	0	0.00216634	4.24773e-05	0.000127432	0.000169909	0.000127432	0	0	0	0	4.24773e-05	0	0	0	0	0	0	0	4.24773e-05	0	0	0	0	0	8.49545e-05	0	0	0
OTU_2297	0	0	0	0	0	0	0	0	0	0	0	0	0	0	0	0	0	0	0.000764591	0	0	0	8.49545e-05	0	0	0.000339818	0	0	0	0.000127432	4.24773e-05	0	4.24773e-05	0	4.24773e-05	0	0	0	4.24773e-05	0	0	0	4.24773e-05	0.000679636	8.49545e-05	0.000127432	0.000254864	0	0
OTU_2298	0	0	0	0	0	0	0	0	0	0	0	0	0	0	0	0	0	0	0	0.000212386	0	0	0	0	0	0	0	0	0	0	0	0	0	0	0	0	0	0	0	0	0	0	0	0	0	0	0	0	0
OTU_2299	0	0	0	0	0	0	0	0	0	0	0	0	0	0	0	0	0	0	0	0	0	0	0	0	0	0	0	0	0	0	0	0	0	0	0	0	0	0	0	0	0	0	0	0	0	0	0	0	0
OTU_23	4.24773e-05	4.24773e-05	8.49545e-05	0.000127432	0	0.000127432	0	0	0	0	0	0	0	0	0	0	0.000127432	4.24773e-05	4.24773e-05	0.000254864	4.24773e-05	0	0	0	0.000127432	0	0.000212386	0	4.24773e-05	0.000127432	0	4.24773e-05	0	0	0	4.24773e-05	0.000127432	0	0	0	0	0	4.24773e-05	4.24773e-05	8.49545e-05	0.000127432	0	0.000169909	0
OTU_230	0	0	0	0	0	0	0	0	0	0	0	0	0	0	0	0	0	0	0	0	0	0	0	0	0	0	0	0	0	0	0	0	0	0	0	0	0	0	0	0	0	0	0	0	0	0	0	0	0
OTU_2300	0	0	0	0	0	0	0	0	0	0	0	0	0	0	0	0	0	0	0	0	0	0	0	0	0	0	0	0	0	0	0	0	0	0	0	0	0	0	0	0	0	0	0	0	0	0	0	0	0
OTU_2301	0	0	0	0	0	0	0	0	0	0	0	0	0	0	0	0	0	0	0	0	0	0	0	0	0	0	0	0	0	0	0	0	0	0	0	0	0	0	0	0	0	0	8.49545e-05	0	0.000212386	0	0	0	0
OTU_2302	0	0	0	0	0	0	0	0	0	0	0	0	4.24773e-05	0	0	0	0	0	0	0	0	0	4.24773e-05	0	0	0	0	0.000127432	4.24773e-05	0	0	0	0	0	0	0	4.24773e-05	0	0	0	4.24773e-05	0	0	0	0	0	0	0	0
OTU_2303	0	0	0	0	0	0	0	0	0	0	0	0	0	0	0	0	0	0	0	0	0	0	0	0	0	0	0	0	0	0	0	0	0	0	0	0	0	0	0	0	0	0	4.24773e-05	0.000637159	0.000127432	0	0	0	0
OTU_2304	0	0	0	0	0	0	0	0	0	0	0	0	0	0	0	0	0	0	0	0	0	0	0	0	0	0	0	0	0	0	0	0	0	0	0	0	0	0	0	0	0	0	0	0	0	0	0	0	0
OTU_2305	0	0	0	0	0	0	0	0	0	0	0	0	0	0	0	0	0	0	0	0	0	0	0	0	0	0	0	0	0	4.24773e-05	8.49545e-05	0	0	0	0	0	0	0	0	0	0	0	0	0	4.24773e-05	0	0	0	0
OTU_2306	0	0	0	0	0	0	0	0	0	0	0	0	0	0	0	0	0	0	0	0	0	0	0	0	0	0	0	0	0	0	0	0	0	0	0	0	0	0	0	0	0	0	0	0	0	0	0	0	0
OTU_2307	0	0	0	0	0	0	0	0	0	0	0	0	0	0	0	0	0	0	0	0	0	0	0	0	0	0	0	0	0	0	0	0	0	0	0	0	0	0	0	0	0	0	4.24773e-05	0.000127432	8.49545e-05	4.24773e-05	0	0	0
OTU_2308	0	0	0	0	0	0	0	0	0	0	0	0	0	0	0	0	0	0	0	0	0	0	0	0	0	0	0	0	0	0	0	0	0	0	0	0	0	0	0	0	0	0	0	4.24773e-05	0.000127432	0	0	0	0
OTU_2309	0	0	0	0	0	0	0	0	0	0	0	0	0	0	0	0	0	0	0	0	0	0	0	0	0	0	0	8.49545e-05	4.24773e-05	0	0	0	0	0	0	0	0	0	0	0	0	0	0	0	0	0	0	0	0
OTU_231	0	0	0	0	0	0	0	0	0	0	0	0	0	0	0	0	0	0	0	0	0	0	0	0	0	0	0	0	0	0	0	0	0	0	0	0	0	0	0	0	0	0	0	0	0	0	0	0	0
OTU_2310	0	0	0	0	0	0	0	0	0	0	0	0	0	0	0	0	0	0	0	0	0	0	0	0	0	0	0	0	0	0	0	0	0	0	0	0	0	0	0	0	0	0	0	0	0	0	0	0	0
OTU_2311	0	0	0	4.24773e-05	0	0	8.49545e-05	0	0	4.24773e-05	0	8.49545e-05	0	0	0	0	0	0	0	4.24773e-05	4.24773e-05	0	0	0	0	0	0	0	0	0	0	0	0	0	0	0	0	0	0	0	0	0	0.000169909	0.000127432	0	0.000424773	0.00046725	0.000424773	0
OTU_2312	0	0.000254864	0.000297341	0.016906	0.000297341	0.00046725	0.000297341	0.000127432	0.00632911	0.000212386	0.000127432	0.00046725	0.000212386	0.000127432	0.000254864	0.000169909	4.24773e-05	4.24773e-05	0.000254864	0.000127432	0	0.000339818	0.000297341	0.00046725	0.000127432	0.000424773	4.24773e-05	0.000509727	0	0.000127432	0.000594682	0.000424773	8.49545e-05	0.000297341	0.000127432	4.24773e-05	4.24773e-05	0.000254864	0.00046725	0.000254864	0.000552205	0.000127432	4.24773e-05	0	0	0.000424773	0.000297341	0.000169909	0.00140175
OTU_2313	0	0	0	0	0	0	0	0	0	0	0	0	0	0	0	0	0	0	0	0	0	0	0	0	0	0	0	0	0	0	0	0	0	0	0	0	0	0	0	0	0	0	4.24773e-05	0	0	4.24773e-05	0	4.24773e-05	0
OTU_2314	0	0	0	0	0	0	0	0	0	0	0	0	0	0	0	0	0	0	4.24773e-05	0	8.49545e-05	0	0	0	0	4.24773e-05	0	0.000254864	4.24773e-05	4.24773e-05	8.49545e-05	0	0	4.24773e-05	0	0	0	0	0	0	0	0	0	0	0	4.24773e-05	0	0.000169909	0
OTU_2315	0	0	0	0	0	0	0	0	0	0	0	0	0	0	0	0	0	0	0	0	0	0	0	0	0	0	0	0	0	0	0	0	0	0	0	0	0	0	0	0	0	0	0	0	0	0	0	0	0
OTU_2316	0	0	0	0	0	0	0	0	0	0	0	0	0	0	0	0	0	0	0	0	0	0	0	0	0	0	0	0	0	0	0	0	0	0	0	0	0	0	0	0	0	0	0	0	0	0	0	0	0
OTU_2317	0	0	0	0	0	0	0	0	0	0	0	0	0	0	0	0	0	0	0	0	0	0	0	0	0	0	0	0	0	0	0	0	0	0	0	0	0	0	0	0	0	0	0	0	0	0	0	0	0
OTU_2318	0	0	0	0	0	0	0	0	0	0	0	0	0	0	0	0	0	0	0	0	0	0	0	0	0	0	0	0	0	0	0	0	0	0	0	0	0	0	0	0	0	0	0	0	0	0	0	0	0
OTU_2319	8.49545e-05	0	0	8.49545e-05	0	4.24773e-05	0	4.24773e-05	0	0.000127432	0	4.24773e-05	4.24773e-05	0	4.24773e-05	0	0.000127432	0	8.49545e-05	0.000254864	0.000212386	0.000169909	0.000212386	4.24773e-05	0.000127432	0.000169909	0.000254864	0.000424773	0.000169909	0.000212386	0.0033557	0.000169909	0.000127432	4.24773e-05	8.49545e-05	0.00046725	0	8.49545e-05	0.000127432	0	0	4.24773e-05	0.00178405	4.24773e-05	0	0.000339818	0.000764591	0.00645655	0
OTU_232	0	0	0	0	0	0	0	0	0	0	0	0	0	0	0	0	0	0	0	0	0	0	0	0	0	0	0	0	0	0	0	0	0	0	0	0	0	0	0	0	0	0	0	0	0	0	0	0	0
OTU_2320	0	0	0	0	0	0	0	0	0	0	0	0	0	0	0	0	0	0	0	0	0	0	0	0	0	0	0	0	0	0	0	0	0	0	0	0	0	0	0	0	0	0	0	0	0	0	0	0	0
OTU_2321	0	0	0	0	0	0	0	0	0	0	0	0	0	0	0	0	0	0	0	0	0	0	0	0	0	0	0	0	0	0	0	0	0	0	0	0	0	0	0	0	0	0	8.49545e-05	8.49545e-05	0.000212386	0	0	0	0
OTU_2323	0	0	0	0	0	0	0	0	0	0	0	0	0	0	0	0	0	0	0	0	0	0	0	0	0	0	0	0	0	0	0	0	0	0	0	0	0	0	0	0	0	0	0	0	0	0	0	0	0
OTU_2325	0	0	0	0	0	0	0	0	0	0	0	0	0	0	0	0	0	0	0	0	0	0	0	0	0	0	0	0	0	0	0	0	0	0	0	0	0	0	0	4.24773e-05	0	0	0	0	0	0	0	0	0
OTU_2326	0	0	0	8.49545e-05	0	0	0	0	0	0	0	0	0	0	0	0	0	0	0	0	4.24773e-05	0	0	0	0.000127432	0	0	0.000169909	4.24773e-05	4.24773e-05	0	0	0	0	0	0	0	8.49545e-05	0	0	0	4.24773e-05	0	0	0	4.24773e-05	0.000127432	4.24773e-05	4.24773e-05
OTU_2327	0	0	4.24773e-05	4.24773e-05	0	0	0	0	4.24773e-05	0	0	0	0	0	0	0.000169909	4.24773e-05	4.24773e-05	0.000552205	0.000254864	0.00369552	0.000169909	0.000424773	4.24773e-05	0.000254864	0.000127432	0.00046725	0.0014867	0.00203891	0.0031858	0.00046725	0.000297341	0.000722114	0	0.000127432	0.000254864	0	4.24773e-05	4.24773e-05	0.000169909	0.000169909	0.00110441	0.000297341	4.24773e-05	0	0.0138051	0.00446011	0.00259111	0
OTU_2328	0	0	0	0	0	0	0	0	0	0	0	0	0	0	0	0	0	0	0	0	0	0	0	0	0	0	0	0	0	0	0	0	0	0	0	0	0	0	0	0	0	0	0	0	0	0	0	0	0
OTU_2329	0	0	0	0	0	0	0	0	0	0	0	0	0	0	0	0	0	0	0	0	0	0	0	0	0	0	0	0	0	0	0	0	0	0	0	0	0	0	0	0	0	0	0	0.000127432	0	0	0	0	0
OTU_233	0	0	0	0	0	0	0	0	0	0	0	0	0	0	0	0	0	0	0	0	0	0	0	0	0	0	0	0	0	0	0	0	0	0	0	0	0	0	0	0	0	0	0	0	0	0	0	0	0
OTU_2331	0	0	0	0	0	0	0	0	0	0	0	0	0	0	0	0	0	0	0	0	0.000169909	0	0	0	0	0	0.000169909	0	8.49545e-05	4.24773e-05	0	0	0	0	0.000127432	8.49545e-05	0	0	0	0	0	0	0.000297341	0.000552205	0.00259111	0.016906	0.0154617	0.0139325	0
OTU_2335	0	0	0	0	0	0	0	0	0	0	0	4.24773e-05	0	0	0	0	0	0	4.24773e-05	0	0	0	0	0	0	0	0	0	0	0	0	0	0	0	0	0	0	0	0	0	0	0	0	4.24773e-05	4.24773e-05	0	0	0.000127432	0.000127432
OTU_2336	0	0	0	0	0	0	0	0	0	0	0	0	0	0	0	0	0	0	0	0	0	0	0	0	0	0	0	0	0	0	0	0	0	0	0	0	0	0	0	0	0	0	0	0	0	0	0	0	0
OTU_2337	0	0	0	0	0	0	0	0	0	0	0	0	0	0	0	0	0	0	0	0	0	0	0	0	0	0	0	0	0	0	0	0	0	0	0	0	0	0	0	0	0	0	8.49545e-05	0	0	0	0	0	0
OTU_2338	0	0	0	0	0	0	0	0	0	0	0	0	0	0	0	0	0	0	0	0	0	0	0	0	0	0	0	0	0	0	0	0	0	0	0	0	0	0	0	0	0	0	0	0	4.24773e-05	4.24773e-05	0	0	0
OTU_2339	0	0	0	0	0	0	0	0	0	0	0	0	0	0	0	0	0	0	0	0	0	0	0	0	0	0	0	0	0	0	0	0	0	0	0	0	0	0	0	0	0	0	0	0	4.24773e-05	0.000212386	8.49545e-05	0.000254864	0
OTU_234	0	0	0	8.49545e-05	0	0	0	0	8.49545e-05	0	0	0	0	0	0	0	0	0	0	0	0	0	0	0	0	0	0	0	0	0	0	0	0	0	0	0	0	0	0	0	0	0	0	0	0	0	0	0	0
OTU_2341	0	0	0	0	0	0	0	0	0	0	0	0	0	0	0	0	0	0	0	0	0	0	0	0	0	0	0	0	0	0	0	0	0	0	0	0	0	0	0	0	0	0	0	0	0	8.49545e-05	8.49545e-05	4.24773e-05	0
OTU_2342	0	0	0	0	0	0	0	0	0	0	0	0	0	0	0	0	0	0	0	0	0	0	4.24773e-05	0	0	0	0	0.000127432	4.24773e-05	8.49545e-05	0	0	4.24773e-05	0	0	0	0	0	0	0	0	0	0	0	0	0	0	0	0
OTU_2343	0	4.24773e-05	0	4.24773e-05	0	0	0.000679636	0.000339818	0	8.49545e-05	0	0	0.000127432	4.24773e-05	4.24773e-05	0.000297341	8.49545e-05	8.49545e-05	0.000127432	0	0.000339818	0.00182652	0.00178405	0.000807068	0.000892023	0.000424773	0.000679636	0.00403534	0.00365305	0.00378048	0.000637159	0.00152918	0.000424773	0.000212386	8.49545e-05	0.000169909	0.000424773	0.00110441	0.000509727	0.000127432	0.000212386	0.000169909	0	0	8.49545e-05	0	0.000127432	0.000212386	8.49545e-05
OTU_2344	0	0	0	0	0	0	0.000212386	4.24773e-05	4.24773e-05	0.00297341	0.00441764	0.00220882	0.000254864	0.000552205	0.000127432	0	0	0	0	0	0	0	0	0	0	0	0	0	0	0	0	8.49545e-05	0	0	0	0	0	0.000127432	0	0	0	0	0	0	0	0	0	0	0
OTU_2345	0	0	0	0	0	0	0	0	0	0	0	0	0	0	0	0	0	0	0	0	0	0	0	0	4.24773e-05	0	0	0	0	0	0	0	0	0	4.24773e-05	0	0	0	0	0	0	0	0.00365305	0.000679636	0.00195395	4.24773e-05	0	0	0
OTU_2346	0	0	0	0	0	8.49545e-05	0	0	0	0	0	0	0	0	0	0	0	0	0	0	0	0.000212386	8.49545e-05	0	0	4.24773e-05	4.24773e-05	0	8.49545e-05	0.00628664	0.000169909	8.49545e-05	0	0	4.24773e-05	0	8.49545e-05	4.24773e-05	0.000212386	0	0	0	0	0	0	0	0	0	0
OTU_2347	0	0	4.24773e-05	0	0	0	0	0	0	0	0	0	0	0	0	0	0	0	0	0	0	0	0	0	0	0	0	0	0	0	0	0	0	0	0	0	0	0	0	0	0	0	0	0	0	0	0	0	0
OTU_2348	0	0	0	0	0	0	0	0	0	0	0	0	0	0	0	0	0	0	0	0	0	0	0	0	0	0	0	0	0	0	0	0	0	0	0	0	0	0	0	0	0	0	0	0	0	0	0	4.24773e-05	0
OTU_2349	0	0	4.24773e-05	0	0.00046725	0	4.24773e-05	0	4.24773e-05	4.24773e-05	0	0	0	0	0	0	0	0	0	0	0	0	0	0	0	0	0	4.24773e-05	0	0	0	0	0	0	0	0	0	0	0	0	0	0	0	0	4.24773e-05	0	0	0	0
OTU_2350	0	0	0	0	0	0	0	0	0	0	0	0	0	0	0	0	0	0	0	0	0	0	0	0	0	0	0	0	0	0	0	0	0	0	0	0	4.24773e-05	0	0	0	0	0	0	0	0	0	0	0	0
OTU_2351	0	0	0	0	0	0	0	0	0	0	4.24773e-05	0	0	0	0	0	0	0	0	0.00182652	0.000339818	0	0	4.24773e-05	0	0	4.24773e-05	0	0	0	0	0	0	0	0	0	0	0	4.24773e-05	0	0	8.49545e-05	0	0	0	0	0	0	0
OTU_2352	0	0	0	0	0	0	0	0	0	0	0	0	0	0	0	0	0	0.000169909	0	0	0	0	0	0	0	0	0	0	0	0	0	0	0	0	0	4.24773e-05	0	0	0	0	0	0	0	0	0	0	0	0	0
OTU_2353	0	0	0	0	0	0	0	0	0	0	0	0	0	0	0	0	0	0	0	0	0	0	0	0	0	0	0	0	0	0	0	0	0	0	0	0	0	0	0	0	0	0	0	0	0	0	0	0	0
OTU_2354	0	0	0	0	0	0	0	0	0	0	0	0	0	0	0	0	0	0	0	0	0	0	0	0	0	0	0	0	0	0	0	0	0	0	0	0	0	0	0	0	0	0	0	0	0	0	0	0	0
OTU_2355	0	0	0	0	0	0	0	4.24773e-05	0	0	0	0	0	0	0	0	0	8.49545e-05	4.24773e-05	0	0.000127432	0	0	0	0.000254864	0	0.000594682	0	0.000552205	0	0	0	0	0	0.00046725	0.00046725	0	0	0	0	4.24773e-05	0	0.00794325	0.00195395	0.00259111	0.0446436	0.0807918	0.0335995	4.24773e-05
OTU_2356	0	0	0	0	0	0	0	0	0	0	0	0	0	0	0	0	0	0	0	0	0	0	0	0	0	0	0	0	0	0	0	0	0	0	0	0	0	0	0	0	0	0	4.24773e-05	0	0	0	0	0	0
OTU_2357	0	0	0	0	0	0	0	0	0	0	0	0	0	0	0	0	0	0	0	0	0	0	0	0	0	0	0	0	0	0	0	0	0	0	0	0	0	0	0	0	0	0	0	0	0.000424773	0	0	0	0
OTU_2358	0	0	0	0	0	0	0	0	0	0	0	0	0	0	0	0	0	0	0	0	0	0	0	0	0	0	0	0	0	0	0	0	0	0	0	0	0	0	0	0	0	0	0	0	0	0	0	0	0
OTU_2359	0	0	0	0	0	0	0	0	0	0	0	0	0	0	0	0	0	0	0	0	0	0	0	0	0	0	0	0	0	0	0	0	0	0	0	0	0	0	0	0	0	0	0	4.24773e-05	0	0	0	0	0
OTU_236	0	0	0	0	4.24773e-05	4.24773e-05	0	0	0	0	0	0	4.24773e-05	0	0	0	0	0	0	0	0	0	0	0	0	0	0	0	0	0	0	0	0	0	0	0	0	0	0	0	0	0	0	0	0	0	0	0	0
OTU_2360	0	0	0	0	0	0	0	0	0	0	0	0	0	0	0	0	0	0	0	4.24773e-05	0	0	0	0	0	0	0	0	0	0	0	0	0	0	0	0	0	0	0	0	0	0	0	0	0	0	0.000127432	0	0
OTU_2361	4.24773e-05	4.24773e-05	4.24773e-05	0	0	8.49545e-05	4.24773e-05	0	0	4.24773e-05	0	0	0	0	0	0	0.000297341	0.00046725	4.24773e-05	0.000976977	0.000339818	0	0	0	0.000339818	0	0.000297341	0	0.000169909	0.000169909	0	0	4.24773e-05	8.49545e-05	4.24773e-05	8.49545e-05	4.24773e-05	0	0	0	0	4.24773e-05	0.000169909	0.000382295	0	0.000552205	0.000722114	0.000807068	4.24773e-05
OTU_2362	0	0	0.000254864	0.000127432	0	0	0.000297341	0	8.49545e-05	8.49545e-05	4.24773e-05	0.000127432	0.000169909	0	0.000169909	0	4.24773e-05	4.24773e-05	0	0	0	4.24773e-05	0	4.24773e-05	8.49545e-05	8.49545e-05	0	8.49545e-05	0	0	0.000127432	0	0	4.24773e-05	0	0	0	0.000212386	4.24773e-05	8.49545e-05	0.000127432	0	0.000339818	0.00208139	0	4.24773e-05	0	0.00046725	0.0232775
OTU_2363	0	0	0	0	0	0	0	0	0	0	0	0	0	0	0	0	0	0	0	0	0	0	0	0	0	0	0	0	0	0	0	0	0	0	0	0	0	0	0	0	0	0	0	0.000127432	0	0	0	0	0
OTU_2364	0	0	0.000169909	0	0	0	0.000127432	0	0	0	0	4.24773e-05	4.24773e-05	4.24773e-05	0	8.49545e-05	0	4.24773e-05	4.24773e-05	8.49545e-05	0	4.24773e-05	0.000297341	4.24773e-05	0	0.000169909	4.24773e-05	0.00178405	0.000849545	0.00110441	0.000552205	0.00118936	8.49545e-05	0.00178405	0.00127432	0.000764591	4.24773e-05	0	0.000169909	0.000127432	0.000169909	0.000169909	0	0	0	4.24773e-05	0.000127432	0	0
OTU_2365	0	0	0	0	0	0	0	0	0	0	0	0	0	0	0	0	0	0	0	0	0	0	0	0	0	0	0	0	0	0	0	0	0	0	0	0	0	0	0	0	0	0	4.24773e-05	4.24773e-05	0	0	0	0	0
OTU_2366	0	0	0	0	0	0	0	0	0	0	0	0	0	0	0	0	0	0	0	0	0	0	0	0	0.000169909	0	0	4.24773e-05	0	0	0	0	0	0	0	0	4.24773e-05	0	0	0	0	0	0	0	0	0	0	0	0
OTU_2367	0	0	0	0	0	0	0	0	0	0	0	0	0	0	0	0	0	0	0	0	0	0	0	0	0	0	0	0	0	0	0	0	0	0	0	0	0	0	0	0	0	0	0	0	0	0	0	0	0
OTU_2368	0	0	0	0	0	0	0	0	0	0	0	0	0	0	8.49545e-05	0	0	0	0	0	0	0	0	0	0	0	0	0	0	0	0	0	0	0	0	0	0	0	0	0	0	0	0	0	0	0	0	0	0
OTU_2369	0	0	0	0	0	0	0	0	0	0	0	0	0	0	0	0	0	0	0	0	0	0	0	0	0	0	0	0	0	0	0	0	0	0	0	0	0	0	0	0	0	0	0	0	0	0	0	0	0
OTU_237	0	0	0	0	0	0	0	0	0	0	0	0	0	0	0	0	0	0	0	0	0	0	0	0	0	0	0	0	0	0	0	0	0	0	0	0	0	0	0	0	0	0	8.49545e-05	8.49545e-05	0	0	0	0	0
OTU_2370	0	0	0	0	0	0	0	0	0	0	0	0	0	0	0	0	0	0	0	0	0	0	0	0	0	0	0	0	0	0	0	0	0	0	0	0	0	0	0	0	0	0	0	8.49545e-05	0	0	0	0	0
OTU_2371	0	0	0	0	0	0	0	0	0	0	0	0	0	0	0	0	0	0	0	0	0	0	0	0	0	0	0	0	0	0	0	0	0	0	0	0	0	0	0	0	0	0	0	0	0	0	0	0	0
OTU_2372	0	0	0	0	0	0	0	0	0	0	0	0	0	0	0	0	0	0	0	0	0	0	0	0	0	0	0	0	0	0	0	0	0	0	0	0	0	0	0	0	0	0	0	4.24773e-05	0	0	0	0	0
OTU_2374	0	0	0	0	0	0	0	0	0	0	0	0	0	0	0	0	0	0	0	0	0	0	0	0	0	0	0	0	0	0	0	0	0	0	0	0	0	0	0	0	0	0	0	0	0	0	0	0	0
OTU_2375	0	0	0	0	0	0	0	0	0	0	0	0	0	0	0	0	0	0	0	0	0	0	0	0	0	0	0	0	0	0	0	0	0	0	0	0	0	0	0	0	0	0	0	0	0	0	0	0	0
OTU_2377	0	0	0	0	0	0	0	0	0	0	0	0	0	0	0	0	0	0	0	0	0	0	0	0	0	0	0	0	0	0	0	0	0	0	0	0	0	0	0	0	0	0	4.24773e-05	8.49545e-05	0	0	4.24773e-05	0	0
OTU_2378	0	0	0	0	0	0	0	0	0	0	0	0	0	0	0	0	0	0	0	0	0	0	0	0	0	0	0	0	0	0	0	0	0	0	0	0	0	0	0	0	0	0	0	0	0	0	0	0	0
OTU_238	0	0	0	0	0	0	0	0	0	0	0	0	0	0	0	0	0	0	0	0	0	0	0	0	0	0	0	0	0	0	0	0	0	0	0	0	0	0	0	0	0	0	0.000127432	0.000254864	0	0	0	0	0
OTU_2381	0	0	0	0	0	0	0	0	0	0	0	0	0	0	0	0	0	0	0	0	0	0	0	0	0	0	0	0	0	0	0	0	0	0	0	0	0	0	0	0	0	0	0	0	0	0	0	0	0
OTU_2383	0	0	0	0	0	0	0	0	0	0	0	0	0	0	0	0	0	0	0	0	0	0	0	0	0	0	0	0	0	0	0	0	0	0	0	0	0	0	0	0	0	0	0	0	0	0	0	0	0
OTU_2384	0	0	0	0	0	0	0	0	0	0	0	0	0	0	0	0	0	0	0	8.49545e-05	4.24773e-05	0	0	0	0	0	4.24773e-05	0	0	0	0	0	0	0	0	0	0	0	0	0	0	0	0	0.000297341	0	0	0	4.24773e-05	0
OTU_2385	0	0	0	0	0	0	0	0	0	0	0	0	0	0	0	0	0	0	0	0	0	0	0	0	0	0	0	0	0	0	0	0	0	0	0	0	0	0	0	0	0	0	0	0	0	0	0	0	0
OTU_2386	0	0	0	0	0	0	0	4.24773e-05	0	0	0	0	0	0	0	0	0	0	0.000127432	0	0.000169909	4.24773e-05	0.000127432	4.24773e-05	0.000509727	0.000297341	0.000254864	0.000339818	0.000382295	0.0009345	0.000127432	0.000212386	0.000212386	0	0.000254864	0	0	4.24773e-05	0.000169909	0	0	8.49545e-05	8.49545e-05	0	0	0.000169909	0.000254864	0.000169909	4.24773e-05
OTU_2387	0.000212386	0.000212386	8.49545e-05	4.24773e-05	0.00140175	0	0	4.24773e-05	4.24773e-05	4.24773e-05	0	0	0	8.49545e-05	0	0	0	0	0	0	0	0	0	4.24773e-05	0	4.24773e-05	0	0	0	0	0	4.24773e-05	0.000127432	0	0	0	0	0	8.49545e-05	0	8.49545e-05	4.24773e-05	0.00106193	0.000552205	0.000382295	0	0	0	4.24773e-05
OTU_2388	0	0	0	0	0	0	0	0	0	0	0	0	0	0	0	0	0	0	0	0	0	0	0	0	0	0	0	0	0	0	0	0	0	0	0	0	0	0	0	0	0	0	0	0	0	0	0	0	0
OTU_2389	0	0	0	0	4.24773e-05	0	0	0	0	0	0	0	0	0	0	0	0	0	0	0	0	0	0	0	0	0	0	0	0	0	0	0	0	0	0	0	0	0	0	0	0	0	0	0	0	0	0	0	0
OTU_239	0	0	0	0	0	0	0	0	0	0	0	0	0	0	0	0	0	0	0	0	0	0	0	0	0	0	0	0	0	0	0	0	0	0	0	0	0	0	0	0	0	0	0	0	0	0	0	0	0
OTU_2390	0	0	0	0	0	4.24773e-05	0	0	4.24773e-05	0	0	0	0	0	0	8.49545e-05	0	0	8.49545e-05	0	0	0	0	0	0	0	0	0	0	0	0	0	0	0	0	0	0	0	0	0	0	0	0.00458755	0.00297341	0.00165661	0.000552205	0.000552205	0.000594682	0
OTU_2391	0	0	0	0	0	0	0	0	0	0	0	0	0	0	0	0	0	0	0	0	0	0	0	0	0	0	0	0	0	0	0	0	0	0	0	0	0	0	0	0	0	0	0	0	0	0	4.24773e-05	0	0
OTU_2392	0	0	0	0	0	0	0	0	0	0	0	0	0	4.24773e-05	0	0	0	0	0	0	0	0	0	0	0	0	0	0	0	0	0	0	0	0	0	0	0	0	0	0	0	0	0	0	0	0	0	0	0
OTU_2393	0	0	0	0	0	0	0	0	0	0	0	0	0	0	0	0	0	0	0	0	0	0	0	0	0	0	0	0	0	0	0	0	0	0	0	0	0	0	0	0	0	0	0	0	0	0	0	0	0
OTU_2394	0	0	0	0	0	0	0	0	0	0	0	0	0	0	0	0	0	0	0	4.24773e-05	0	0	0	0	0	0	0	0	0	0	0	0	4.24773e-05	0	0	0	0	0	0	0	0	0	0	0	4.24773e-05	0	0	0	0
OTU_2395	0	0	0	0	0	0	0	0	0	0	0	0	0	0	0	0	0	0	4.24773e-05	0	0	0	0	0	8.49545e-05	0	0	0	4.24773e-05	0	8.49545e-05	0	0	0	0	0	0	0	0	0	0	0	0	0	0	4.24773e-05	0	0	0
OTU_2396	0	0	0	0	0	0	0	0	0	0	0	0	0	0	0	0	0	0	0	0	0	0	0	0	0	0	0	0	0	0	0	0	0	0	0	4.24773e-05	0	0	0	0	0	0	0	0	0	0	0	0	0
OTU_2397	0	0	0	0	0	0	0	0	0	0	0	0	0	0	0	0	0	0	0	0	0	0	0	0	0	0	0	0	0	0	0	0	0	0	0	0	0	0	0	4.24773e-05	0	0	0	4.24773e-05	4.24773e-05	0	0	0	0
OTU_2398	0	0	0	0	0	0	0	0	0	0	0	0	0	0	0	0	0	0	0	0	0	0	0	0	0	0	0	0	0	0	0	0	0	0	0	0	0	0	0	0	0	0	0	0	0	0	0	0	0
OTU_2399	0	0	0	0	0	0	0	0	0	0	0	0	0	0	0	0	0	0	0	0	0	0	0	0	0	0	0	0	0	0	0	0	0	0	0	0	0	0	0	0	0	0	0	4.24773e-05	0	0	4.24773e-05	0	0
OTU_24	0	0	0	0	0	0	0	0	0	0	0	0	0	0	0	0	0	0	0	0	0	0	0	0	0	0	0	0	0	0	0	0	0	0	0	0	0	0	0	0	0	0	0	0	0	0	0	0	0
OTU_240	0	0	0	0	0	0	0	0	0	0	0	0	0	0	0	0	0	0	0	0	0	0	0	0	0	0	0	0	0	0	0	0	0	0	0	0	0	0	0	0	0	0	0	0	0	0	0	0	0
OTU_2400	0	0	0	0	0	0	0	0	0	0	0	0	0	0	0	0	0	0	0	0	0	0	0	0	0	0	0	0	0	0	0	0	0	0	0	0	0	0	0	0	0	0	0.000637159	4.24773e-05	0	0	0	0	0
OTU_2401	0	0	0	0	0	0	0	0	0	0	0	0	0	0	0	0	0	0	0	0	0	0	0	0	0	0	0	0	0	0	0	0	0	0	0	0	0	0	0	0	0	0	8.49545e-05	0.000254864	0.000382295	4.24773e-05	0	0	0
OTU_2402	0	0	0	0	0	0	0	0	0	0	0	0	0	0	0	0	0	0	0	0	0	0	0	0	0	0	0	0	0	0	0	4.24773e-05	0	0	0	0	0	0	0	0	0	0	0	0	0	0	0	0	0
OTU_2403	0	0	0	0	0	0	0	0	0	0	0	0	0	0	0	0	0	0	0	0	0	0	0	0	0	0	0	0	0	0	0	0	0	0	0	0	0	0	0	0	0	0	0	0	0	0	0	0	0
OTU_2404	0	0	0	0	0	0	0	0	0	0	0	0	0	0	0	0	0	0	0	0	0	0	0	0	0	0	0	0	0	0	0	0	0	0	0	0	0	0	0	0	0	0	0	0	0	0	0	0	0
OTU_2405	0	0	0	0	0	0	0	0	0	0	0	0	0	0	0	0	0	0	0	0	0	0	0	0	0	0	4.24773e-05	0	0	0	0	0	0	0	0	0	0	0	0	0	0	0	0	0	0	0	0	0	0
OTU_2406	0	0	0	0	0	0	0	0	0	0	0	0	0	0	0	0	0	0	0	4.24773e-05	4.24773e-05	0	0	0	0.000424773	0	8.49545e-05	4.24773e-05	0.000297341	4.24773e-05	0.000339818	4.24773e-05	0	0	0	0	0	0	0	0	0	0	0	0	0.000297341	0	0	0	0
OTU_2407	0	0	0.000169909	0	0	0.00165661	8.49545e-05	4.24773e-05	0	0.000212386	4.24773e-05	0.000509727	0.000509727	0	8.49545e-05	0.00140175	0.000169909	4.24773e-05	0.000764591	0.000339818	0.00203891	0.000382295	4.24773e-05	0.000976977	0.000382295	0.000212386	0.00378048	0.00046725	0.000594682	0.001869	0.00114689	0.00135927	4.24773e-05	0.00152918	0.00552205	0.000594682	0.103347	0.0137202	0.0765865	0.00288845	0.00416277	0.00178405	0.000509727	0.00191148	0.000722114	0.00276102	0.00199643	0.00191148	4.24773e-05
OTU_2408	0	0	0	0	0	0	0	0	0	0	0	0	0	0	0	0	0	0	0	0	0	0	0	0	0	0	0	0	0	0	0	0	0	0	0	0	0	0	0	0	0	0	0	0	0	0	0	0	0
OTU_2409	0	0	0	0	0	0	0	0	0	0	0	0	0	0	0	0	0	0	0	0	0	0	0	0	0	0	0	0	0	0	0	0	0	0	0	0	0	0	0	0	0	0	0	0	0	0	0	0	0
OTU_2410	0	0	0	0	0	0	0	0	0	0	0	0	0	8.49545e-05	0	0	0	0	0	0	0	0	0	0	0	0	0	0	0	0	0	0	0	0	0	0	0	0	0	0	0	0	0	0	0	0	0	0	0
OTU_2411	0	0	0	0	0	0	0	0	0	0	0	0	0	0	0	0	0	0	0	0	0	0	0	0	0	0	0	0	0	0	0	0	0	0	0	0	0	0	0	0	0	0	8.49545e-05	0	0	0	0	0	0
OTU_2412	0	0	0	0	0	0	0	0	0	0	0	0	0	0	0	0	0	0	0	0	0	0	0	0	0	0	0	0	0	0	0	0	0	0	0	0	0	0	0	0	0	0	0	0	0	0	0	0	0
OTU_2413	0	0	0	0	0	0	8.49545e-05	0	0	0	0	0	0	0	0	0	0	0	0	0	0	0	0	0	0	0	0	0	0	0	0	0	0	0	0	0	0	0	0	0	0	0	0	0	0	0	0	0	0
OTU_2414	0	0	0	0	0	0	0	0	0	0	0	0	0	0	0	0	0	0	0	0	0	0	0	0	0	0	0	0	0	0	0	0	0	0	0	0	0	0	0	0	0	0	0	0	0	0	0	0	0
OTU_2415	0	0	0	0	0	0	0	0	0	0	0	0	0	0	0	0	0	0	0	0	0	0	0	0	0	0	0	0	0	0	0	0	0	0	0	0	0	0	0	0	0	0	4.24773e-05	0	0	0	0	0	4.24773e-05
OTU_2416	0	0	0	0	0	0	0	0	0	0	0	0	0	0	0	0	0	0	0	0	0	0	0	0	0	0	0	0	0	0	0	0	0	0	0	0	0	0	0	0	0	0	0	0	0	0	0	0	0
OTU_2417	0	0	0	0	0	0	0	0	0	0	0	0	0	0	0	0	0	0	0	0	0	0	0	0	0	0	0	0	0	0	0	0	0	0	0	0	0	0	0	0	0	0	0	0	0	0	0	0	0
OTU_2418	0	0	0	0	0	0	0	0	0	0	0	0	0	0	0	0	0	0	0	0	0	0	0	0	0	0	0	0	0	0	0	0	0	0	0	0	0	0	0	0	0	0	0	0	0	0	0	0	0
OTU_2419	0	0	0	0	0	0	0	0	0	0	0	0	0	0	0	0	0	0	0	0	0	0	0	0	0	0	0	0	0	0	0	0	0	0	0	0	0	0	0	0	0	0	0	0	0	0	0	0	0
OTU_242	0	0	0	0	4.24773e-05	0	0	0	0	0	4.24773e-05	0	0	0	0	0	0	0	0	0	0	0	0	0	0	0	0	0	0	0	0	0	0	0	0	0	0	0	0	0	0	0	0	0	0	0	0	0	0
OTU_2420	0	0	0	0	0	0	0	0	0	0	0	0	0	0	0	0	0	0	0	0	0	0	0	0	0	0	0	0	0	0	0	0	0	0	0	0	0	0	0	0	0	0	0	0	0	0	0	0	0
OTU_2421	0	0	0	0	0	0	0	0	0	0	0	0	0	0	0	0	0	0	0	0	0	0	0	0	0	0	0	0	0	0	0	0	0	0	0	0	0	0	0	0	0	0	0	0	0	0	0	0	0
OTU_2422	0	0	0	0	0	0	0	0	0	0	0	0	0	0	0	0	0	0	0	0	0	0	0	0	0	0	0	0	0	0	0	0	0	0	0	0	0	0	0	0	0	0	0	0	0	0	0	0	0
OTU_2423	0	0	0	0	0	0	0	0	0	0	0.000127432	0	0	0	0	0	0	0	0	0	0	0	0	0	0	0	0	0	0	0	0	0	0	0	0	0	0	0	0	0	0	0	0	0	0	0	0	0	0
OTU_2424	0	0	0	0	0	0	0	0	0	0	0	0	0	0	0	0	0	0	0	0	0	0	0	0	0	0	0	0	0	0	0	0	0	0	0	0	0	0	0	0	0	0	0	0	0	0	0	0	0
OTU_2425	0	0	0	0	0	0	0	0	0	0	0	0	0	0	0	0	0	0	0	0	0	0	0	0	0	0	0	0	0	0	0	0	0	0	0	0	0	0	0	0	0	0	0	0	0	0	0	0	0
OTU_2426	0	0	0	0	0	0	0	0	0	0	0	0	0	0	0	0	0	0	0	0	0	0	0	0	0	0	0	0	0	0	0	0	0	0	0	0	0	0	0	0	0	0	0	0	0	0	0	0	8.49545e-05
OTU_2428	0	0	4.24773e-05	4.24773e-05	0	0.000169909	0	0	0	0	0	0	0	0	0	4.24773e-05	0.000169909	0	0	0.000127432	0	0	0	0	0	0	0	0	0	0	0	0	0	0	0	4.24773e-05	0	0	0	0	0	0	8.49545e-05	0.000127432	0.000297341	0	0	0	0
OTU_2429	0	0	0	0	0	0	0	0	0	0	0	0	0	0	0	0	0	0	0	0	0	0	0	0	0.00127432	0	0	0	4.24773e-05	0	0	0	0	0	0	0	0	0	0	0	0	0	0.210857	0.00114689	0	0.00127432	0.000849545	0	0
OTU_243	0	0	0	4.24773e-05	0	0	0	0	0	0	0	0	0	0	0	0	0	0	0	0	0	0	0	0	0	0	0	0	0	0	0	0	0	0	0	0	0	0	0	0	0	0	0	0	0	0	0	0	0
OTU_2430	0	0	4.24773e-05	0	0	0	0	0	0	4.24773e-05	8.49545e-05	0	0	0	0	0	0	0	4.24773e-05	0.000212386	0.000169909	0	0	0	8.49545e-05	8.49545e-05	4.24773e-05	0.000637159	8.49545e-05	8.49545e-05	0.000254864	0	0.000127432	4.24773e-05	8.49545e-05	4.24773e-05	0	0	0	0	4.24773e-05	0	0	0	0	0.000339818	0.000127432	0.00152918	0.000127432
OTU_2432	0	0	0	0	0	0	0	0	0	0	0	0	0	0	0	0	0	0	0	0	0	0	0	0	0	0	0	0	0	0	0	0	0	0	0	0	0	0	0	0	0	0	0	0	0	0	0	0	0
OTU_2433	0	0	0	0	0	0	0	0	0	0	0	0	0	0	0	0	0	0	0	0	0	0	0	0	0	0	0	0	0	0	0	0	0	0	0	0	0	0	0	0	0	0	0	0	0	0	0	0	0
OTU_2434	0	0	0	0	0	0	0	0	0	0	0	0	0	0	0	0	0	0	0	0	0	0	0	0	4.24773e-05	0	0	0	0	0	0	0	0	0	0	0	0	0	0	0	0	0	0.00297341	0.00407782	0.00543709	4.24773e-05	0.000127432	0.000297341	0
OTU_2436	0	0	0	0	0	0	0	0	0	0	0	0	0	0	0	0	0	0	0	0	0	0	0	0	4.24773e-05	0	0	0	0	0	0	0	0	0	0	0	0	0	0	0	0	0	0	0	4.24773e-05	0	0	0	0
OTU_2437	0	0	0	0	0	0	0	0	0	0	0	0	0	0	0	0	0	0	0	0	0	0	0	0	0	0	0	0	0	0	0	0	0	0	0	0	0	0	0	0	0	0	0	0	0	0	0	0	0
OTU_2438	0	0	0	0	0	0	0	0	0	0	0	0	0	0	0	0	0	0	0	0	0	0	0	0	0	0	0	0	0	0	0	0	0	0	0	0	0	0	0	0	0	0	0	0	0	0	0	0	0
OTU_2439	0	0	0	0	0	0	8.49545e-05	4.24773e-05	0	4.24773e-05	0	0	0	0	0	0	0	8.49545e-05	0	0	0	0	0	0	4.24773e-05	0	4.24773e-05	0	0	0	0	0	0	0	0	0	4.24773e-05	0	0	0	0	4.24773e-05	0	0	0	0	0	0	0
OTU_244	0	0	0	0	0	0	0	0	0	0	0	0	0	0	0	0	0	0	0	0	0	0	0	0	0	0	0	0	0	0	0	0	0	0	0	0	0	0	0	0	0	0	0	0	0	0	0	0	0
OTU_2440	0	0	0	0	0	0	0	0	0	0	0	0	0	0	0	0	0	0	0	0	0	0	0	0	0	0	4.24773e-05	0	0	0	0	0	0	0	0	0	0	0	0	0	0	0	4.24773e-05	0.000169909	0.000127432	0.0009345	0.000637159	0.000339818	0
OTU_2441	0	0	0	0	0	0	0	0	0	0	0	0	0	0	0	0	0	0	0	0	0	0	0	0	0	0	0	0	0	0	0	0	0	0	0	0	0	0	0	0	0	0	0	0	0	0	0	0	0
OTU_2442	0	0	0	0	0	0	0	0	0	0	0	0	0	0	0	0	0	0	0	0	0	0	0	0	4.24773e-05	0	0	0	0	4.24773e-05	0	0	0	0	0	0	0	0	0	0	4.24773e-05	0	4.24773e-05	0	0	0	0	0	0
OTU_2443	0	0	0	0	0	0	0	0	0	0	0	0	0	0	0	0	0	0	0	0	0	0	0	0	0	0	0	0	0	0	0	0	0	0	0	0	0	0	0	0	0	0	0	0	0	0	0	0	0
OTU_2444	0	0	0	0	0	0	0	0	0	0	0	0	0	0	0	0	0	0	0	0	0	0	0	0	0	0	0	0	0	0	0	0	0	0	0	0	0	0	0	0	0	0	0	0	0	0	0	0	0
OTU_2445	0	0	0	0	0	0	0	0	0	0	0	0	0	0	0	0	0	0	0	0	0	0	0	0	0	0	0	0	0	0	0	0	0	0	0	0	0	0	0	0	0	0	0	0	0	0	0	0	0
OTU_2446	0	0	0	0	0	0	0	0	0	0	0	0	0	0	0	0	0	0	0	0	0	0	0	0	0	0	0	0	0	0	0	0	0	0	0	0	0	0	0	0	0	0	0.000679636	0	0	0	0	0	0
OTU_2447	0	0	0	0	0	0	0	0	0	0	0	0	0	0	0	0	0	0	0	0	0	0	0	0	0	0	0	0	0	0	0	0	0	0	0	0	0	0	0	0	0	0	8.49545e-05	0	0	0	0	0	0
OTU_2448	0	0	0	0	0	0	0	0	0	0	0	0	0	0	0	0	0	0	0	0	0	0	0	0	0	0	0	0	0	0	0	0	0	0	0	0	0	0	0	0	0	0	0	0	4.24773e-05	4.24773e-05	8.49545e-05	4.24773e-05	0
OTU_2449	0	0	0	0	0	0	0	0	0	0	0	0	0	0	0	0	0	0	0	0	0	0	0	0	8.49545e-05	0	0	0	8.49545e-05	0	0.000212386	8.49545e-05	4.24773e-05	0	0	0	0	0	0	0	0	0	0	0	4.24773e-05	4.24773e-05	0	0	0
OTU_245	0	0	0	0	0	0	0	0	0	0	0	0	0	0	0	0	0	0	0	0	0	0	0	0	0	0	0	0	0	0	0	0	0	0	0	0	0	0	0	0	0	0	0	0	0	0	0	0	0
OTU_2450	0	0	0	0	0	0	0	0	0	0	0	0	0	0	0	0	0	0	0	0	0	0	0	0	0	0	0	0	0	0	0	0	0	0	0	0	0	0	0	0	0	0	4.24773e-05	4.24773e-05	8.49545e-05	0	0	0	0
OTU_2451	0	0	0	0	0	0	0	0	0	0	0	0	0	0	0	0	0	0	0	0	0	0	0	0	0	0	0	0	0	0	0	0	0	0	0	0	0	0	0	0	0	0	0	0	0	0	0	0	0
OTU_2452	0	0	0	0	0	0	0	0	0	0	0	0	0	0	0	0	0	0	0	0	0	0	0	0	0	0	0	0	0	0	0	0	4.24773e-05	0	0	0	0	0	0	0	0	0	0	0	0	0	0	0	0
OTU_2453	0	0	0	0	0	0	0	0	0	0	0	0	8.49545e-05	4.24773e-05	0	0	0	0	0	0	0	0	0	0	0	0	0	0	0	0	0	0	0	0	0	0	0	0	0	0	0	0	8.49545e-05	0.000849545	0	0	4.24773e-05	0	0
OTU_2454	0	0	0	0	0	0	0	0	0	0	0	0	0	0	0	0	0	0	0	0	0	0	0	0	0	0	0	0	0	0	0	0	0	0	0	0	0	0	0	0	0	0	0	0	0	0	0	0	0
OTU_2455	0	0	0	0	0	0	0	0	0	0	0	0	0	0	0	0	0	0	0	0	0	0	0	0	0	0	0	0	0	0	0	0	0	0	0	0	0	0	0	0	0	0	0.000594682	8.49545e-05	4.24773e-05	4.24773e-05	8.49545e-05	0	0
OTU_2456	0	0	0	0	0	0	0	0	0	0	0	0	0	0	0	0	0	0	0	0	0	0	0	0	0	0	0	0	0	0	0	0	0	0	0	0	0	0	0	0	0	0	0	0	0	0	0	0	0
OTU_2457	0	0	0	0	0	0	0	0	0	0	0	0	0	0	0	0	0	0	0	0	0	0	0	0	0	0	0	0	0	0	0	0	0	0	0	0	0	0	0	0	0	0	0	0	0	0	0	0	0
OTU_2458	0	0	0	0	0	0	0	0	0	0	0	0	0	0	0	0	0	0	0	0	0	0	0	0	0	0	0	0	0	0	0	0	0	0	0	0	0	0	0	0	0	0	0	0	0	0	0	0	0
OTU_2459	0	0	0	0	0	0	0	0	0	0	0	0	0	0	0	0	0	0	0	0	0	0	0	0	0	0	0	0	0	0	0	0	0	0	0	0	0	0	0	0	0	0	0	0	0	0	0	0	0
OTU_246	0	0	0	0	0	0	0	0	0	0	0	0	0	0	0	0	0	0	0	0	0	0	0	0	0	0	0	0	0	0	0	0	0	0	0	0	0	0	0	0	0	0	0	0	0	0	0	0	0
OTU_2460	0	0	0	0	0	0	0	0	0	0	0	0	0	0	0	0	0	0	0	0	0	0	0	0	0	0	0	0	0	0	0	0	0	0	0	0	0	0	0	0	0	0	0.000127432	0	0.000127432	0	0	0	0
OTU_2461	0	0	0	0	0	0	0	0	0	0	0	0	0	0	0	0	0	0	0	0	0	0	0	0	0	0	0	0	0	0	0	0	0	0	0	0	0	4.24773e-05	0	0	4.24773e-05	0	0	0	4.24773e-05	8.49545e-05	0	0	0
OTU_2462	0	0	0	0	0	0	0	0	0	0	0	0	0	0	0	0	0	0	0	0	0	0	0	0	0	0	0	0	0	0	0	0	0	0	0	0	0	0	0	0	0	0	0	8.49545e-05	8.49545e-05	0	0	0	0
OTU_2463	0	0	0	0	0	0	0	0	0	0	0	0	0	0	0	0	0	0	0	0	0	0	0	0	0	0	0	0	0	0	0	0	0	0	0	0	0	0	0	0	0	0	0	0	0	0	0	0	0
OTU_2464	0	0	0	4.24773e-05	0	0	4.24773e-05	0	0	4.24773e-05	0	0	0	0	0	0	4.24773e-05	0	0	8.49545e-05	0	0	0	0	0	0	0	4.24773e-05	4.24773e-05	0	0	0	0	0	0	4.24773e-05	0	0	0	0	0	0	0.00110441	0.000892023	0.000722114	0.000764591	0.00135927	0.0014867	0.000424773
OTU_2465	0	0	0	0	0	0	0	0	0	0	0	0	0	0	0	0	0	0	0	0	0	0	0	0	0	0	0	0	0	0	0	0	0	0	0	0	0	0	0	0	0	0	0	0	0	0	0	0	0
OTU_2466	0	0	0	0	0	0	0	0	0	0	0	0	0	0	0	0	0	0	0	0	0	0	0	0	0	0	0	0	0	0	0	0	0	0	0	0	0	0	0	0	0	0	8.49545e-05	4.24773e-05	0	0	0	0	0
OTU_2467	0	0	0	0	0	0	0	0	0	0	0	0	0	0	0	0	0	0	0	0	0	0	0	0	0	0	0	0	0	0	0	0	0	0	0	0	0	0	0	0	0	0	0	0	0	0	0	0	0
OTU_2468	0	0	0	0	0	0	0	0	0	0	0	0	0	0	0	0	0	0	0	4.24773e-05	0	0	0	0	0	0	0.000127432	4.24773e-05	0	4.24773e-05	0	0	0	4.24773e-05	0	0	0	8.49545e-05	8.49545e-05	4.24773e-05	0	0	0	0	0	0	0	0	0
OTU_2469	0	0	0	0	0	0	0	0	0	0	0	0	0	0	0	0	0	0	0	0	0	0	0	0	0	0	0	0	0	0	0	0	0	0	0	0	0	0	0	0	0	0	0	0	0	0	0	0	0
OTU_247	0	0	0	0	0	0	0	0	0	0	0	0	0	0	0	0	0	0	0	0	0	0	0	0	0	0	0	0	0	0	0	0	0	0	0	0	0	0	0	0	0	0	0	0	0	0	0	0	0
OTU_2470	0	0	0	0	0	0	0	0	0	0	0	0	0	0	0	4.24773e-05	0	0	0	0	0	0	0	0	4.24773e-05	0	0	4.24773e-05	0	0	0	0	0	0	0	0	0	0	4.24773e-05	0	0	0	0	0	0	0	0	0	0
OTU_2471	0	0	0	0	0	0	0	0	0	0	0	0	0	0	0	0	0	0	0	0	0	0	0	0	0	0	0	0	0	0	0	0	0	0	0	0	0	0	0	0	0	0	0	0	0	0	0	0	0
OTU_2472	0	0	0	0	0	0	0	0	0	0	0	0	0	0	0	0	0	0	0	0	0	0	0	0	0	0	0	0	0	0	0	0	0	0	0	0	0	0	0	0	0	0	0	0	0	0	0	0	0
OTU_2473	0	0	0	0	0	0	0	0	0	0	0	0	0	0	0	0	0	0	0	0	0	0	0	0	0	0	0	0	0	0	0	0	0	0	0	0	0	0	0	0	0	0	0	8.49545e-05	4.24773e-05	0	0	0	0
OTU_2474	4.24773e-05	4.24773e-05	0	4.24773e-05	0	0	0	0	0	0	0	0	0	0	0	0	0	0	0	0	0	0	0	0	0	0	0	0	0	0	0	0	0	0	0	0	0	4.24773e-05	0	0	0	0	0	0	0	0	0	0	0
OTU_2475	0	0	0	4.24773e-05	4.24773e-05	0	0	0	4.24773e-05	8.49545e-05	0	0	0.000127432	0	4.24773e-05	0	0	0	0	0	0	0	0	0	4.24773e-05	0	0	0.000127432	0	0	0	0	0	0	0	4.24773e-05	0	0	4.24773e-05	0	8.49545e-05	0	0.00403534	0.000127432	0	4.24773e-05	8.49545e-05	0.000212386	0.00352561
OTU_2476	0	0	0	0	0	0	0	0	0	0	0	0	0	0	0	0	0	0	0	0	0	0	0	0	0	0	0	0	0	0	0	0	0	0	0	0	0	0	0	0	0	0	0	0	0	0	0	0	0
OTU_2477	0	0	0	0	0	0	0	0	0	0	0	0	0	0	0	0	0	0	0	0	0	0	0	0	0	0	0	0	0	0	0	0	0	0	0	0	0	0	0	0	0	0	0	0	0	0	0	4.24773e-05	0
OTU_2478	0	0	0	0	0	0	0	0	0	0	0	0	0	0	0	0	0	0	0	0	0	0	0	0	0	0	0	0	0	0	0	0	0	0	0	0	0	0	0	0	0	0	4.24773e-05	4.24773e-05	0	0	0	0	0
OTU_248	0	0	0	0	0	0	0	0	0	0	0	0	0	0	0	0	0	0	0	0	0	0	0	0	0	0	0	0	0	0	0	0	0	0	0	0	0	0	0	0	0	0	0	0	0	0	0	0	0
OTU_2480	0	0	0	0	0	0	0	0	0	0	0	0	0	0	0	0	0	0	0	0	0	0	0	0	0	0	0	0	0	0	0	0	0	0	0	0	0	0	0	0	0	0	0	0	0.000127432	0	4.24773e-05	0	0
OTU_2481	0	0	0	0	0	0	0	0	0	0	0	0	0	0	0	0	0	0	0	0	0	0	0	0	0	0	0	0	0	0	0	0	0	0	0	0	0	0	0	0	0	0	0	0	0	0	0	0	0
OTU_2482	0	0	0	0	0	0	0	0	0	0	0	0	0	0	0	0	0	0	0	0	0	0	0	0	0	0	0	0	0	0	0	0	0	0	0	0	0	0	0	0	0	0	0	0	0	0	0	0	0
OTU_2483	0	0	0	0	0	0	0	0	0	0	0	0	0	0	8.49545e-05	0	0	0	0	0	0	0	0	0	0	0	0	0	0	0	0	0	0	0	0	0	0	0	0	0	0	0	0	0	0	0	0	0	0
OTU_2484	0	0	0	0	0	4.24773e-05	4.24773e-05	0	0	0	0	8.49545e-05	0	0	0	0	0	0	0	0	0	8.49545e-05	0	8.49545e-05	0	4.24773e-05	0	0.000127432	0.000127432	0.000254864	4.24773e-05	0.000127432	0	0	0	0	0	0	4.24773e-05	0	0.000424773	0.000212386	0	0	0	4.24773e-05	0	0	0
OTU_2485	0	0	0	0	0	0	0	0	0	0	0	0	0	0	0	8.49545e-05	0	0	0	0	0	0	0	0	0	0	0	0	0	0	0	0	0	0	0	0	0	0	0	0	0	0	0	0	0	0	0	0	0
OTU_2486	0	0	0	0	0	0	0	0	0	0	0	0	0	0	0	0	0	0	0	0	0	0	0	0	0	0	0	0	0	0	0	0	0	0	0	0	0	0	0	0	0	0	0	0	0	0	0	0	0
OTU_2489	0	0	0	0	0	0	0	0	0	0	0	0	0	0	0	0	0	0	0	0	0	0	0	0	0	0	0	0	0	0	0	0	0	0	0	4.24773e-05	0	0	0	0	0	0	0	0	4.24773e-05	0	0	0	0
OTU_249	0	0	0	0	0	0	0	0	0	0	0	0	0	0	0	0	0	0	0	0	0	0	0	0	4.24773e-05	0	0	0	0	0	0	0	0	0	0	0	0	0	0	0	0	0	0.00199643	0.000807068	4.24773e-05	0	0	0	0
OTU_2491	0	0	0	0	0	0	0	0	0	0	0	0	0	0	0	0	0	0	0	0	0	0	0	0	0	0	0	0	0	0	0	0	0	0	0	0	0	0	0	0	0	0	0	0	0	0	0	0	0
OTU_2492	0	0	0	0	0	0	0	0	0	0	0	0	0	0	0	0	0	0	0	0	0	0	0	0	0	0	0	0	0	0	0	0	0	0	0	0	0	0	0	0	0	0	0	0	0	0	0	0	0
OTU_2493	0	0	0	0	0	0	0	0	0	0	0	0	0	0	0	0	0	0	0	0	0	0	0	0	0	0	0	0	0	0	0	0	0	0	0	0	0	0	0	0	0	0	0	0	0	0	0	0	4.24773e-05
OTU_2494	0	0	0	0	0	0	0	0	0	0	0	0	4.24773e-05	0	0	0	0	0	0	0	0	0	0	0	4.24773e-05	0	0	0	0	0	0	0	0	0	0	0	0	0	0	0	0	0	0	0	0	0	0	0	0
OTU_2495	0	0	0.000424773	0.000339818	0	4.24773e-05	0.000382295	4.24773e-05	0.000339818	4.24773e-05	4.24773e-05	0	0	0	0.000254864	4.24773e-05	0.000169909	4.24773e-05	0.000127432	0.000339818	0.000297341	4.24773e-05	4.24773e-05	0	0.000764591	0.000722114	0.000254864	8.49545e-05	0.000764591	0.000212386	0.000169909	0.000297341	0.000382295	0.000297341	8.49545e-05	0	0.000127432	0.000339818	8.49545e-05	0.000127432	0.000127432	0.000254864	0.000849545	8.49545e-05	4.24773e-05	0.00220882	0.00259111	0.00152918	0.00237873
OTU_2496	0	0	0	0	0	0	0	0	0	0	0	0	0	0	0	0	0	0	0	0	0	0	0	0	0	0	0	0	0	0	0	0	0	0	0	0	0	0	0	0	0	0	0	0	0	0	0	0	0
OTU_2497	0	0	4.24773e-05	4.24773e-05	0	0	0	0	4.24773e-05	0	8.49545e-05	0	0	0	0	4.24773e-05	8.49545e-05	0	0	0	8.49545e-05	0	0	0	0	4.24773e-05	8.49545e-05	0	4.24773e-05	0	8.49545e-05	0	0	0	0	4.24773e-05	0	0	0	0	0	0	0.00203891	0.00161414	0.000764591	0.00237873	0.00293093	0.00327075	0.00101945
OTU_2499	0	0	0	0	0	0	0	0	0	0	0	0	0	0	0	0	0	0	0	0	0	0	0	0	0	0	0	0	0	0	0	0	0	0	0	0	0	0	0	0	0	0	4.24773e-05	0	0	0	0	4.24773e-05	0
OTU_25	0	0	0	0	0	0	0	0	0	0	0	0	0	0	0	0	0	0	0	0	0	0	0	0	0	0	0	0	0	0	0	0	0	0	0	0	0	0	0	0	0	0	0	0	0	0	0	0	0
OTU_250	0	0	0	0	0	0	0	0	0	0	0	0	0	0	0	0	0	0	0	0	0	0	0	0	0	0	0	0	0	0	0	0	0	0	0	0	0	0	0	0	0	0	0	4.24773e-05	0	0	0	0	0
OTU_2501	0	0	0	0	0	0	0	0	0	0	0	0	0	0	0	0	0	0	4.24773e-05	0	0	0	0	0	4.24773e-05	0	0.000339818	0	0	0	0	0	0	0	0	4.24773e-05	0	0	0	8.49545e-05	0	0	0	0	0.000382295	8.49545e-05	4.24773e-05	0	0
OTU_2502	0	0	4.24773e-05	0	0	0	4.24773e-05	0	0	4.24773e-05	4.24773e-05	0	0	0	4.24773e-05	0	0	4.24773e-05	0	0	8.49545e-05	0.000212386	0.000424773	8.49545e-05	0.000212386	0.000339818	0.000297341	0.00152918	8.49545e-05	0.0009345	0.000594682	0.000254864	0.000594682	8.49545e-05	8.49545e-05	8.49545e-05	8.49545e-05	0	8.49545e-05	8.49545e-05	0.000254864	0.000212386	0	4.24773e-05	0	0.000254864	0.000637159	0.000552205	0
OTU_2503	0	0	0	0	0	0	0	0	0	0	0	0	0	0	0	0	0	0	0	4.24773e-05	0	0	0	0	0	0	0	0	0	0	0	0	0	0	0	0.000892023	0	0	0	0	0	0	0	0	0	0	0	0	0
OTU_2504	0	0	4.24773e-05	4.24773e-05	4.24773e-05	0	0	0	0	0	0	0	0	0	0	0	0	0	0	0	0	0	0	0	0	0	0	0	0	0	0	0	0	0	0	0	0	0	0	0	0	0	4.24773e-05	0	0	0	0	0	0
OTU_2505	0	0	0	0	0	0	0	0	0	0	0	0	0	0	0	0.000127432	0	4.24773e-05	0	0	0.000127432	0	0	0	0	0	0	0	0	0	0	0	0	0	0	0	0	0	0	0	0	0	0.000424773	0.00140175	0.000339818	4.24773e-05	0	4.24773e-05	0
OTU_2506	0	0	0	0	0	0	0	0	0	0	0	0	0	0	0	0	0	0	0	0	4.24773e-05	0	0	0	0	0	0.000169909	4.24773e-05	4.24773e-05	0.000127432	4.24773e-05	8.49545e-05	0.000127432	0	0.000127432	4.24773e-05	8.49545e-05	0	4.24773e-05	0.000254864	0.000297341	0.000212386	0	0	0	0	0	0	0
OTU_2507	0	0	0	0	0	0	0	0	0	0	0	0	0	0	0	0	0	0	0	0	0	0	0	0	0	0	0	0	0	0	0	0	0	0	0	0	0	0	0	0	0	0	0	0	0	0	0	0	0
OTU_2508	0	0	0	0	0	0	0	0	0	0	0	0	0	0	0	0	0	0	0	0	0	0	0	0	0	0	0	0	0	0	0	0	0	0	0	0	0	0	0	0	0	0	0	0	0	0	0	0	0
OTU_2509	0	0	0	0	0	0	0	0	0	0	0	0	0	0	0	0	0	0	0	0	0	0	0	0	0	0	0	0	0	0	0	0	0	0	0	0	0	0	0	0	0	0	4.24773e-05	4.24773e-05	8.49545e-05	0	4.24773e-05	0	0
OTU_251	0	0	0	0	0	0	0	0	0	0	0	0	0	0	0	0	0	0	0	0	0	0	0	0	0	0	0	0	0	0	0	0	0	0	0	0	0	0	0	0	0	0	0	4.24773e-05	0	0	0	0	0
OTU_2510	0	0	0	0	0	0	0	0	0	0	0	0	0	0	0	0	0	0	0	0	0	0	0	0	0	0	0	0	0	0	0	0	0	0	0	0	0	0	0	0	0	0	0	8.49545e-05	0.000127432	0	0	0	0
OTU_2511	0	0	0	0	0	0	0	0	0	0	0	0	0	0	0	0	0	0	0	0	0	0	0	0	4.24773e-05	0	0	0	0	0	0	0	0	0	0	0	0	0	0	0	4.24773e-05	0	0	0	0	0	0	0	0
OTU_2512	0	0	0	0	0	0	0	0	0	0	0	0	0	0	0	0	0	0	0	0	0	0	0	0	0	0	0	0	0	0	4.24773e-05	0	0	0	0	0	0	0	0	0	0	0	0	8.49545e-05	0	0	0	0	0
OTU_2513	0	0	0	0	0	0	0	0	0	0	0	0	0	0	0	0	0	0	0	0	0	0	0	0	0	0	0	0	0	0	0	0	0	0	0	0	0	0	0	0	0	0	8.49545e-05	0	4.24773e-05	0	0	0	0
OTU_2514	0	0	0	0	0	0	0	0	0	0	0	0	0	0	0	0	0	0	0	0	0	0	0	0	0	0	0	0	0	0	0	0	0	0	0	4.24773e-05	0	0	0	0	0	0	4.24773e-05	0	0	0	0	0	0
OTU_2515	0	0	0	0	0	0	0	0	0	0	0	0	0	0	0.000254864	0	0	0	0	0	0	0	0	0	0	0	0	0	0	0	0	0	0	0	0	0	0	0	0	0	0	0	0	0	0	0	0	0	0
OTU_2516	0	0	0	0	0	0	0	0	0	0	0	0	0	0	0	0	0	0	0	0	0	0	0	0	0	0	0	0	0	0	0	0	0	0	0	0	0	0	0	0	0	0	0	4.24773e-05	0.000169909	0	0	0	4.24773e-05
OTU_2517	0	0	0	0	0	0	0	0	0	0	0	0	0	0	0	0	0	0	0	0	0	0	0	0	0	0	0	0	0	0	0	0	0	0	0	0	0	0	0	0	0	0	0	0	0	0	0	0	4.24773e-05
OTU_2518	0	0	0	0	0	0	0	0	0	0	0	0	0	0	0	0	0	0	0	0	0	0	0	0	0	0	0	0	0	0	0	0	0	0	0	0	0	0	0	0	0	0	0	0	0	0	0	0	0
OTU_2519	0	0	0	0	0	0	0	0	0	0	0	0	0	0	0	0	0	0	0	0	0	0	0	0	0	0	0	0	0	0	0	0	0	0	0	0	0	0	0	0	0	0	0	0	0	0	0	0	0
OTU_252	0	0	0	4.24773e-05	0	0	0	0	0.000127432	0	0	0	0	0	0	0	0	0	0	0	0	0	0	0	0	0	0	0	0	0	0	0	0	0	0	0	0	0	0	0	0	0	0	0	0	0	0	0	0
OTU_2520	0	0	0	0	0	0	0	0	0	0	0	0	0	0	0	0	0	0	0	0	0	0	0	0	0	0	0	0	0	0	0	0	0	0	0	0	0	0	0	0	0	0	0	0	0	0	0	0	0
OTU_2521	0	0	0	0	0	0	0	0	0	0	0	0	0	0	0	0	0	0	0	0	0	0	0	0	0	0	0	0	0	0	0	0	0	0	0	0	0	0	0	0	0	0	0	0	0	0	0	0	0
OTU_2522	0	0	0	0	0	0	0	0	0	0	0	0	0	0	0	0	0	0	0	0	0	0	0	0	0	0	0	0	0	0	0	0	0	0	0	0	0	0	0	0	0	0	0.000127432	0	0	0	0	0	0
OTU_2523	0	0	0	0	0	0	0	0	0	0	0	0	0	0	0	0	0	0	0	0	0	0	0	0	0	0	0	0	8.49545e-05	0	0	0	4.24773e-05	0	0	0	0	0	0	0	0	0	0	0	0.000339818	0.000127432	4.24773e-05	0.000297341	0
OTU_2524	0	0	0	0	0	0	0	0	0	0	0	0	0	0	0	0	0	0	0	0	0	0	0	0	0	0	0	0	0	0	0	0	0	0	0	0	0	0	0	0	0	0	0	0	0	0	0	0	0
OTU_2525	0	0	0	0	0	0	0	0	0	0	8.49545e-05	0	0	0	0	0	4.24773e-05	0	0	0	0	0	0	0	0	0	0	0	0	0	0	0	0	0	0	0	0	0	0	0	0	0	0	0	0	0	0	0	0
OTU_2526	0	0	0	0	0	0	0	0	0	0	0	0	0	0	0	0	0	0	0	0	0	0	0	0	0	0	0	0	0	0	0	0	0	0	0	0	0	0	0	0	0	0	0	0	0	0	0	0	0
OTU_2527	0	0	0	0	0	0	0	0	0	0	0	0	0	0	0	0	0	0	0	0	0	0	0	0	0	0	0	0	0	0	0	0	0	0	0	0	0	0	0	0	0	0	0	0	0	0	0	0	0
OTU_2528	0	0	0	0	0	0	0	0	0	0	0	0	0	0	0	0	0	0	0	0	0	0	0	0	0	0	0	0	0	0	0	0	0	0	0	0	0	0	0	0	0	0	0	0	0	0	0	0	0
OTU_2529	0	0	0	0	0	0	0	0	0	0	0	0	0	0	0	0	0	0	0	0	0	0	0	0	0	0	0	0	0	0	0	0	0	0	0	0	0	0	0	0	0	0	0	0	0	0	0	0	0
OTU_253	0	0	0	0	0	0	0	0	4.24773e-05	0	0	0	0	0	0	0	0	0	0	0	0	0	0	0	0	0	0	0	0	0	0	0	0	0	0	0	0	0	0	0	0	0	0	0	0	0	0	0	0
OTU_2530	0	0	0	0	0	0	0	0	0	0	0	0	0	0	0	0	0	0	0	0	0	0	0	0	0	0	0	0	0	0	0	0	0	0	0	0	0	0	0	0	0	0	0	0	0	0	0	0	0
OTU_2531	0	0	0	0	0	0	0	0	0	0	0	0	0	0	0	0	0	0	0	0	0	0	0	0	0	0	0	0	0	0	0	0	0	0	0	0	0	0	0	0	0	0	0	0	0	0	0	0	0
OTU_2532	0	0	0	0	0	0	0	0	0	0	0	0	0	0	0	0	0	0	0	0	0	0	0	0	0	0	0	0	0	0	0	0	0	4.24773e-05	0	0	0	0	0	0	0	0	0	4.24773e-05	0	0	0	0	0
OTU_2533	0	0	0	0	0	0	0	0	0	0	0	0	0	0	0	0	0	0	0	0	0	0	0	0	0	0	0	0	0	0	0	0	0	0	0	0	0	0	0	0	0	0	0	0	0	0	0	0	0
OTU_2535	0	0	0	0	0	0	0	0	0	0	0	0	0	0	0	0	0	0	0	0	0	0	0	0	0	0	0	0	0	0	0	0	0	0	0	0	0	0	0	0	0	0	8.49545e-05	0	0	0	0	0	0
OTU_2536	0	0	0	0	0	0	0	0	0	0	0	0	0	0	0	0	0	0	0	4.24773e-05	0	0	0	0	0	0	0	0	0	0	0	0	0	0	0	0	0	0	0	0	0	0	0	0	0	0	0	0	0
OTU_2538	0	0	0	0	0	0	0	0	0	0	0	0	0	0	0	0	0	0	0	0	8.49545e-05	0	4.24773e-05	4.24773e-05	0	0	0	8.49545e-05	0.000212386	0.000169909	0.00114689	0.000892023	0.000382295	0	0	0	4.24773e-05	0.000169909	4.24773e-05	8.49545e-05	0	0	0	4.24773e-05	0	0	0	0	0
OTU_2539	0	0	0	0	0	0	0	0	0	0	0	0	0	0	0	0	0	0	0	0	0	0	0	4.24773e-05	0	0	0	0	0	0	0	0	0	0	0	0	0	0	0	0	0	0	0	0	0	0	0	0	0
OTU_254	0	0	0	0	0	0	0	0	0	0	0	0	0	0	0	0	0	0	0	0	0	0	0	0	0	0	0	0	0	0	0	0	0	0	0	0	0	0	0	0	0	0	0	0	0	0	0	0	0
OTU_2540	0	0	0	0	0	0	0	0	0	0	0	0	0	0	0	0	0	0	0	0	0	0	0	0	0	0	0	0	0	0	0	0	0	0	0	0	0	0	0	0	0	0	0	8.49545e-05	0	0	0	0	0
OTU_2543	0	0	0	0	0	0	0	0	0	0	0	0	0	0	0	0	0	0	0	0	0	0	0	0	0	0	0	0	0	0	0	0	0	0	0	0	0	0	0	0	0	0	0	0	0	0	0	0	0
OTU_2544	0	0	0	0	0	0	0	0	0	0	0	0	0	0	0	0	0	0	0	0	0	0	0	0	0	0	0	0	0	0	0	0	0	0	0	0	0	0	0	0	0	0	0	0	0	0	0	0	0
OTU_2546	0	0	0	0.000509727	0	0	4.24773e-05	0	0.000212386	0	4.24773e-05	0	0	0	0	0	0	0	0	0	0	0	4.24773e-05	0	0	0	0	0	0	0	0	4.24773e-05	0	0	0	0	0	0	0	4.24773e-05	0	0	4.24773e-05	8.49545e-05	0.000169909	0	0	0	0
OTU_2547	0	0	0	8.49545e-05	0	0	0	0	4.24773e-05	0	0	0	0	0	0	0	0	0	0	0	0	0	0	0	0	0	0	0	0	0	0	0	0	0	0	0	0	0	0	0	0	0	0	0	0	0	0	0	0
OTU_2548	0	0	0	0	0	0.000552205	0	0	0	0	0	4.24773e-05	0	0	0	0.000127432	0	0	0	4.24773e-05	0	4.24773e-05	4.24773e-05	4.24773e-05	0.000169909	8.49545e-05	0.000169909	0	0	0.000552205	0	4.24773e-05	0	4.24773e-05	4.24773e-05	0	0.0358933	0.000424773	0	0.000424773	0.000254864	0.000424773	0	0	0	0	0	0	0
OTU_2549	0	0	0	0	0	0	0	0	0	0	0	0	0	0	0	0	0	0	0	0	0	0	0	0	0	0	0	0	0	0	0	0	0	0	0	4.24773e-05	0	0	0	0	0	0	0	0	0	0	0	0	0
OTU_255	0	0	0	0	0	0	0	0	0	0	0	0	0	0	0	0	0	0	0	0	0	0	0	0	0	0	0	0	0	0	0	0	0	0	0	0	0	0	0	0	0	0	0	0	0	0	0	0	0
OTU_2551	0	0	0	0	4.24773e-05	0	0	0	0	0	0	0	0	0	0	0	0	0	0	0	0	0	0	0	0	0	0	0	0	0	0	0	0	0	0	0	0	0	0	0	0	0	0	0	0	0	0	0	0
OTU_2552	0	0	0	0	0	0	0	0	4.24773e-05	0	0	0	0	4.24773e-05	0	0	0	0	0	0	0	0	0	0	0	0	0	0	0	0	0	0	0	0	0	0	0	0	0	0	0	0	0	0	0	0	0	0	0
OTU_2553	0	0	0	0	0	0	0	0	0	0	0	0	0	0	0	0	0	0	0	0	0	0	0	0	0	0	0	0	0	0	0	0	0	0	0	0	0	0	0	0	0	0	0	0	0	0	0	0	0
OTU_2554	0	0	0	0	0	0	0	0	0	0	0	0	0	0	0	0	0	0	0	0	0	0	0	0	0	0	0	0	0	0	0	0	0	0	0	0	0	0	0	0	0	0	0	0	0	0	0	0	0
OTU_2555	0	0	0	0	0	0	0	0	0	0	0	0	0	0	0	0	0	0	0	0	0	0	0	0	0	0	0	0	0	0	0	0	0	0	0	0	0	0	0	0	0	0	0	0	0	0	0	0	0
OTU_2556	0	0	0	0	0	0	0	0	0	0	0	0	0	0	0	0	0	0	0	0	0	0	0	0	0	0	0	0	0	0	0	0	0	0	0	0	0	0	0	0	0	0	0	0	0	0	0	0	0
OTU_2557	0	0	0	0	0	0	0	0	0	0	0	0	0	0	0	0	0	0	0	0	0.000127432	0	0	0	0	0	0	0	0	0	0	0	0	0	0	4.24773e-05	0	0	0	0	0	0	0	0	0	0	0	0	0
OTU_2559	0	0	0	0	0	0	0	0	0	0	0	0	0	0	0	0	0	0	0	0	0	0	0	0	0	0	0	0	0	0	0	0	0	0	0	0	0	0	0	0	0	0	0	0	0	0	0	0	0
OTU_256	0	0	0	0	0	0	0	0	0	0	0	0	0	0	0	0	0	0	0	0	0	0	0	0	0	0	0	0	0	0	0	0	0	0	0	0	0	0	0	0	0	0	0	0	0	0	0	0	0
OTU_2560	0.000169909	0	0.0009345	0.000552205	0.000169909	0.000722114	0	0	4.24773e-05	0.000127432	0.000169909	0.000127432	4.24773e-05	0.000127432	4.24773e-05	0.000254864	0.000382295	0.000127432	0	0.00267607	0	0	0	4.24773e-05	0.000212386	0	0	0	4.24773e-05	0.000424773	0	4.24773e-05	0	4.24773e-05	0	8.49545e-05	0.000212386	4.24773e-05	4.24773e-05	0	8.49545e-05	0	0.00361057	0.0041203	0.0098972	0.000339818	0.000424773	0.000339818	0.00390791
OTU_2561	0	0	0	0	0	0	0	0	0	0	0	0	0	0	0	0	4.24773e-05	0	0	0	0	0	0	0	4.24773e-05	0	8.49545e-05	0	4.24773e-05	0	0	0	0	0	0	0	0	0	0	0	0	0	4.24773e-05	0	0.000169909	0.000424773	0.000424773	0.000297341	0.000127432
OTU_2562	0	0	0	0	0	0	0	0	0	0	0	0	0	0	0	0	0	0	0	0	0	0	0	0	0	0	0	0	0	0	0	0	0	0	0	0	0	0	0	0	0	0	0	0	0	0	0	0	0
OTU_2563	0	0	8.49545e-05	0	0	0	0	0	0	4.24773e-05	0	0	0	0	4.24773e-05	0	0	0	0	4.24773e-05	0	0	0	0	0.000254864	0.000169909	0.000127432	4.24773e-05	0.000127432	0.000424773	0.000849545	0.000254864	0.000212386	0	0	0	0.000509727	4.24773e-05	4.24773e-05	8.49545e-05	0.000339818	0	8.49545e-05	0	0	4.24773e-05	0	4.24773e-05	0.000127432
OTU_2564	0	0	0	0	0	0	0	0	0	0	0	0	0	0	0	0	0	0	0	0	0	0	0	0	0	0	0	0	0	0	0	0	0	0	0	0	0	0	0	0	0	0	0	0	4.24773e-05	0	0	0	0
OTU_2565	0	0	0	0	0	0	0	0	0	0	0	0	0	0	0	0	0	0	0	0	0	0	0	0	0	0	0	0	0	0	0	0	0	0	0	0	0	0	0	0	0	0	0	0	0	0	0	0	0
OTU_2567	4.24773e-05	0	0	0	0	0	0	0	0	0	8.49545e-05	0	0	0	0	0	0	0	0	0	0	0	0.000127432	0	0	0	0	0	0	0	0	0.000212386	0	0	0	0	0	0	0	0.000127432	0	0	0	8.49545e-05	8.49545e-05	4.24773e-05	0	0	0
OTU_2568	0	0	0	0	0	0	0	0	0	0	0	0	0	0	0	0	0	0	0	0	0	0	0	0	0	0	0	0	0	0	0	0	0	0	0	0	0	0	0	0	0	0	0	0	0	0	0	0	0
OTU_2569	0	0	0	0	0	0	0	0	0	0	0	0	0	0	0	0	0	0	0	0	0	0	0	0	0	0	0	0	0	0	0	0	0	0	0	0	0	0	0	0	0	0	0	0	0	0	0	0	0
OTU_257	0	0	0	0	0	0	0	0	0	0	0	0	0	0	0	0	0	0	0	0	0	0	0	0	0	0	0	0	0	0	0	0	0	0	0	0	0	0	0	0	0	0	0	0	0	0	0	0	0
OTU_2570	0	0	0	0	0	0	0	0	0	0	0	0	0	0	0	0	0	0	0	0	0	0	0	0	0	0	0	0	0	0	0	0	0	0	0	0	0	0	0	0	0	0	0	0	0	0	0	0	0
OTU_2571	0	0	0	0	0	0	0	0	0	0	0	0	0	0	0	0	0	0	0	0	0	0	0	0	0	0	0	0	0	0	0	0	0	0	0	0	0	0	0	0	0	0	4.24773e-05	0	0	0	0	0	0
OTU_2572	0	0	0	0	0	0	0	0	0	0	0	0	0	0	0	0	0	0	0	0	0	0	0	0	4.24773e-05	0	0	0	0	0	0	0	0	0	0	0	0	0	0	0	0	0	0.00191148	0.00293093	0.003738	4.24773e-05	4.24773e-05	0.000212386	0
OTU_2575	4.24773e-05	0	4.24773e-05	0	0	4.24773e-05	0.000127432	0	0	0.000892023	0.00169909	0.000807068	0.000212386	0.000339818	0.00046725	0	0	0	0	0	0	0	0	4.24773e-05	0	0	0	0	0	0	0	0	0	0	0	0	0	0	4.24773e-05	4.24773e-05	0	0	0.00632911	0.0149095	0.000976977	0.000127432	0.00046725	0	0.000169909
OTU_2576	0	0	0	0	0	0	0	0	0	0	0	0	0	0	0	0	0	0	0	0	0	0	0	0	0	0	0	0	0	0	0	0	0	0	0	0	0	0	0	0	0	0	0.000594682	0.000254864	0	0	0	8.49545e-05	0
OTU_2577	0	0	0	0	0	0	0	4.24773e-05	0	0.000127432	4.24773e-05	0	4.24773e-05	0	4.24773e-05	0	0	0	0	0	0	0	4.24773e-05	0	0	0	0	0	0	4.24773e-05	0	4.24773e-05	4.24773e-05	0	0	0	0	8.49545e-05	0	4.24773e-05	0	0	0	0	0	0	0	0	4.24773e-05
OTU_2578	0	0	0	0	0	0	0	0	0	0	0	0	0	0	0	0	0	0	0	0	0	0	0	0	0	0	0	0	0	0	0	0	0	0	0	0	0	0	0	0	0	0	0	0	0	0	0	0	0
OTU_2579	0	0	0	0	0	0	0	0	0	0	0	0	0	0	0	0	0	0	0	0	0	0	0	0	0	0	0	0	0	0	0	0	0	0	0	0	0	0	0	0	0	0	0	0	0	0	0	0	0
OTU_258	0	0	0	0.000297341	0	0	0	0	8.49545e-05	0	4.24773e-05	0	0	0	0	0	0	0	0	0	0	0	0	0	0	4.24773e-05	0	0	0	0	0	0	0	0	0	0	0	0	0	0	0	0	0	0	0	0	0	0	0
OTU_2580	0	0	0	0	0	0	0	0	0	0	0	0	0	0	0	0	0	0	0	0	0	0	0	0	0	0	4.24773e-05	0	0	0	0	0	0	0	0	0	0	0	0	0	0	0	8.49545e-05	4.24773e-05	4.24773e-05	0	0	0	0
OTU_2581	0	4.24773e-05	0	0	0	0	0	0	0	0	0	0	0	0	0	0	0	0	0	0	0	0	0	0	0	0	0	0	0	0	0	0	0	0	0	0	0	0	0	0	0	0	0	4.24773e-05	0	0	0	0	0
OTU_2582	0	0	0	0	0	0	0	0	0	0	0	0	0	0	0	0	0	0	0	0	0	0	0	0	0	0	0	0	0	0	0	0	0	0	0	0	0	0	0	0	0	0	0	0	0	0	0	0	0
OTU_2583	0	0	0	0	0	0	0	0	0	0	0	0	0	0	0	0	0	0	0	0	0	0	0	0	0	0	0	0	0	0	0	0	0	0	0	0	0	0	0	0	0	0	0	0.000509727	0.00046725	0	0	0	0
OTU_2584	0	0	0	0	0	0	0	0	0	0	0	0	0	0	0	0	0	0	0	0	0	0	0	0	0	0	0	0	0	0	0	0	0	0	0	0	0	0	0	0	0	0	0	0	0	0	0	0	0
OTU_2585	0	0	0	0	0	0	0	0	0	0	0	0	0	0	0	0	0	0	0	0	0	0	0	0	0	0	0	0	0	0	0	0	0	0	0	0	0	0	0	0	0	0	0	0	0	0	0	0	0
OTU_2586	0	0	0	0	0	0	0	0	0	0	0	0	0	0	0	0	0	0	0	0	0	0	8.49545e-05	0	0	0	0	0	0	0	0	4.24773e-05	0	0	0	0	0	0	0	0	0	0	8.49545e-05	0	0.000169909	0	0	0	0
OTU_2587	0	0	0	0	0	0	0	0	0	0	0	0	0	0	0	0	0	0	0	4.24773e-05	0	0	0	0	0	0	0	0	0	0	0	0	0	0	0	0	0	0	0	0	0	0	0	0	0	0	0	0	0
OTU_2588	0	0	0	0	0	0	0	0	0	0	0	0	0	0	0	0	8.49545e-05	0	0	0	0	0	0	0	0	0	0	0	0	0	0	0	0	0	0	0	0	0	0	0	0	0	0	0	0	0	0	0	0
OTU_2589	0	0	0	0	0	0	0	0	0	0	0.000127432	4.24773e-05	0	0	0	0	0	0	0	0	0	0	0	0	0	0	0	0	0	0	0	0	0	0	0	0	0	0	0	0	0	0	0	0	0	0	0	0	0
OTU_259	0	0	0	0	0	0	0	0	0	0	0	0	0	0	0	0	0	0	0	0	0	0	0	0	0	0	0	0	0	0	0	0	0	0	0	0	0	0	0	0	0	0	8.49545e-05	4.24773e-05	4.24773e-05	0	0	0	0
OTU_2590	0	0	0	0	0	0	0	0	0	0	0	0	0	0	0	0	0	0	0	0	0	0	0	0	0	0	0	0	0	0	0	0	0	0	0	0	0	0	0	0	0	0	0	0	0.000127432	0	0	0	0
OTU_2591	8.49545e-05	0.000169909	0.00127432	0.000339818	0.00046725	0.000339818	0.00182652	4.24773e-05	4.24773e-05	0	0.00161414	0.000169909	0	0.000127432	0.00101945	4.24773e-05	0	0	0	0	0	8.49545e-05	0.00118936	0.000127432	0	0.00169909	0	0.000339818	0.00174157	0.00267607	0.000254864	0.00203891	0.000169909	0.00110441	4.24773e-05	8.49545e-05	8.49545e-05	4.24773e-05	0.000254864	0.00169909	0.000169909	8.49545e-05	4.24773e-05	4.24773e-05	0	0.00046725	0.00161414	0.000297341	0.000297341
OTU_2592	0	0	0	0	0	0	0	0	0	0	0	0	0	0	0	0	0	0	0	0	0	0	0	0	0	0	0	0	0	0	0	0	0	0	0	0	0	0	0	0	0	0	0	0	0	0	0	0	0
OTU_2593	0	0	0	0	0	0	0	0	0	0	0	0	0	0	0	0	0	0	0	0	0	0	0	0	0	0	0	0	0	0	0	0	0	0	0	0	0	0	0	0	0	0	0	0	4.24773e-05	0	0	0	0
OTU_2594	0	0	0	0	0	0	0	0	0	0	0	0	0	0	0	0	0	0	0	0	0	0	0	0	0	0	0	0	0	0	0	0	0	4.24773e-05	0	0	0	0	0	0	0	0	0	0	0	0	0	0	0
OTU_2595	0	0	0	0	0	0	0	0	0	0	0	0	0	0	0	0	0	0	0	0	0	0	0	0	0	0	0	0	0	0	0	0	0	0	0	0	0	0	0	0	0	4.24773e-05	0	0	0	0	0	0	0
OTU_2596	0	0	0	0	0	0	0	0	0	0.000127432	0	0	4.24773e-05	0	0	0	0	0	0	0	0	0	0	0	0	0	0	0	0	0	0	0	0	0	0	0	0	0	0	0	0	0	0	0	0	0	0	0	0
OTU_2597	0	0	0	0	0	0	0	0	0	0	0	0	0	0	0	0	0	0	0	0	0	0	0	0	0	0	0	0	0	0	0	0	0	0	0	0	0	0	0	0	0	0	0	0	0	0	0	0	0
OTU_2598	0	0	0	0	0	0	0	0	0	0	0	0	0	0	0	0	0	0	0	0	0	0	0	0	0	0	0	0	0	0	0	0	0	0	0	0	0	0	0	0	0	0	0	4.24773e-05	0	0	0	0	0
OTU_2599	0	0	0	0	0	0	0	0	0	0	0	0	0	0	0	0	0	0	0	0	0	0	0	0	0	0	0	0	0	0	0	0	0	0	0	0	0	0	0	0	0	0	0	0	0	0	0	0	0
OTU_26	0	0	0	0	0	0	0	4.24773e-05	0	4.24773e-05	0	0	0	0	0	0	0	0	0	0	0	8.49545e-05	0	0	0	0	0	0	0	4.24773e-05	0.0024212	0	0	0	0	0	0	0	0	0	0	0	0	0	0	0	0	0	0
OTU_260	0	0	0	4.24773e-05	0	0	0	0	0	0	0	0	0	0	0	0	0	0	0	0	0	0	0	0	0	0	0	0	0	0	0	0	0	0	0	0	0	0	0	0	0	0	0	0	0	0	0	0	0
OTU_2600	0	0	0	0	0	0	0	0	0	0	0	0	0	0	0	0	0	0	0	0	0	0	0	0	0	0	0	0	0	0	0	0	0	0	0	0	0	0	0	0	0	0	0	0	0	0	0	0	0
OTU_2601	0	0	0	0	0	0	0	0	0	0	0	0	0	0	0	0	0	0	0	0	0	0	0	0	0	0	0	0	0	0	0	0	0	0	0	0	0	0	0	0	0	0	0.000169909	0.00259111	0	4.24773e-05	0	0	0
OTU_2602	0	0	0	0	0	0	0	0	0	0	0	0	0	0	0	0	0	0	0	0	0	0	0	0	0	0	0	0	0	0	0	0	0	0	0	0	0	0	0	0	0	0	0	0	0	0	0	0	0
OTU_2603	0	0	0	0	0	0	0	0	0	0	0	0	0	0	0	0	0	0	0	0	0	0	0	0	0	0	0	0	0	0	0	0	0	0	0	0	0	0	0	0	0	0	0.000679636	0	0	8.49545e-05	0	0	0
OTU_2604	0	0	0	0	0	0	0	0	0	0	0	0	0	0	0	0	0	0	0	0	0	0	0	0	0	0	0	0	0	0	0	0	0	0	0	0	0	0	0	0	0	0	0	0	0	0	0	0	0
OTU_2605	0	0	0	0	0	0	0	0	0	0	0	0	0	8.49545e-05	0	0	0	0	0	0	0	0	0	0	0	0	0	0	0	0	0	0	0	0	0	0	0	0	0	0	0	0	0	0	0	0	0	0	0
OTU_2608	0	0	0	0	0	0	0	0	0	0	0	0	0	0	0	0	0	0	0	0	0	0	0	0	0	0	0	0	0	0	0	0	0	0	0	0	0	0	0	0	0	0	0	0	0	0	0	0	0
OTU_2609	0	0	0	0	0	0	0	0	0	0	0	0	0	0	0	0	0	0	0	0	0	0	0	0	0	0	0	0	0	0	0	0	0	0	0	0	0	0	0	0	0	0	0	0	0	0	0	0	0
OTU_261	0	0	0	0	0	0	0	0	0	0	0	0	0	0	0	0	0	0	0	0	0	0	0	0	0	0	0	0	0	0	0	0	0	0	0	0	0	0	0	0	0	0	0	0	0	0	0	0	0
OTU_2610	0	0	0	0	0	0	0	0	0	0	0	0	0	0	0	0	0	0	0	0	0	0	0	0	0	0	0	0	0	0	0	0	0	0	0	0	0	0	0	0	0	0	0	0	0	0	0	0	0
OTU_2611	0	0	0	0	0	0	0	0	0	0	0	0	0	0	0	0	0	0	0	0	0	0	0	0	0	0	0	0	0	0	0	0	0	0	0	0	0	0	0	0	0	0	0	0	0	0	0	0	4.24773e-05
OTU_2612	0	0	0	0	0	0	0	0	0	0	0	0	0	0	0	0	0	0	0	0	0	0	0	0	0	0	0	0	0	0	0	0	0	0	0	0	0	4.24773e-05	0	0	0	0	0	0	0	0	0	0	0
OTU_2613	0	0	0	0	0	0	0	0	0	0	0	0	0	0	0	0	0	0	0	4.24773e-05	0	0	0	0	0	0	0	0	0	0	0	0	0	0	0	0	0	0	0	0	0	0	0.00169909	0.00237873	0.0422649	8.49545e-05	4.24773e-05	0	0
OTU_2614	0	0	0	0	0	0	0	0	0	0	0	0	0	0	0	0	0	0	0	0	0	0	0	0	0	0	0	0	0	0	0	0	0	0	0	0	0	0	0	0	0	0	0	0	0.000127432	0	0	0	0
OTU_2615	0	0	0	0	0	0	0	0	0	0	0	0	0	0	0	0	0	0	0	0	0	0	0	0	0	0	0	0	0	0	0	0	0	0	0	0	0	0	0	0	0	0	8.49545e-05	0	0	0	0	0	0
OTU_2616	0	0	0	0	0	0	0	0	0	0	0	0	0	0	0	0	0	0	0	0	0	0	0	0	0	0	0	0	0	0	0	0	0	0	0	0	0	0	0	0	0	0	0	0	0	0	0	0	0
OTU_2617	0	0	0	0	0	0	0	0	0	0	0	0	0	0	0	0	0	0	0	0	0	0	0	0	0	0	0	0	0	0	0	0	0	0	0	0	0	0	0	0	0	0	0	0	0	0	0	0	0
OTU_262	0	0	0	0	0	0	0	0	0	0	0	0	0	0	0	0	0	0	0	0	0	0	0	0	0	0	0	0	0	0	0	0	0	0	0	0.000169909	0	0	0	0	0	0	0	0	0	0	0	0	0
OTU_2622	0	0	0	0	0	0	0	0	0	0	0	0	0	0	0	0	0	0	0	0	0	0	0	0	0	0	0	0	0	0	0	0	0	0	0	0	0	0	0	0	0	0	0	0	0	0	0	0	0
OTU_2623	0	0	0	0	0	0	0	0	0	0	0	0	4.24773e-05	0	0	0	0	0	0	4.24773e-05	4.24773e-05	0	0	0	0.000339818	4.24773e-05	0	0	0	0	4.24773e-05	0	0	0	0	4.24773e-05	0	0	0	4.24773e-05	4.24773e-05	0	0	0	8.49545e-05	0	0	0	0
OTU_2624	0	0	0	0	0	0	0	0	0	0	0	0	0	0	0	0	0	0	0	0	0	0	0	0	0	0	0	0	0	0	0	0	0	0	0	0	0	0	0	0	0	0	0	0	0	0	0	0	0
OTU_2625	0	0	0	0	0	0	0	0	0	0	0	0	0	0	0	0	0	0	0	0	0	0	0	0	0	0	0	0	0	0	4.24773e-05	0	0	0	0	0	0	0	0	0	0	0	0	0	0	0	0	0	0
OTU_2628	0	0	0	0	0	0	4.24773e-05	0	0	8.49545e-05	0	0	8.49545e-05	4.24773e-05	0	4.24773e-05	0	0	0	0	0	0.000297341	0	0	0.000212386	4.24773e-05	8.49545e-05	0	0	0	0.000127432	0	0	0	0	4.24773e-05	4.24773e-05	0	4.24773e-05	0	8.49545e-05	4.24773e-05	0	0.000169909	0.000807068	0	4.24773e-05	0	4.24773e-05
OTU_2629	0	0	0	0	0	0	0	0	0	0	0	0	0	0	0	0	0	0	0	0	0	0	0	0	0	0	0	0	0	0	0	0	0	0	0	0	0	0	0	0	0	0	0	0	0	0	0	0	0
OTU_263	0	0	0	0	0	0	0	0	0	0	0	0	0	0	0	0	0	0	0	0	0	0	0	0	0	0	0	0	0	0	0	0	0	0	0	0	0	0	0	0	0	0	0	0	0	0	0	0	0
OTU_2630	0	0	0	4.24773e-05	0	0	0	0	0	0	0	0	4.24773e-05	8.49545e-05	0	0	0	0	0	0	0	0	0	0	0	0	0	0	0	0	0	0	0	0	0	0	0	0	0	0	4.24773e-05	0	8.49545e-05	4.24773e-05	8.49545e-05	4.24773e-05	4.24773e-05	0	8.49545e-05
OTU_2633	0	0	0	0	0	0	0	0	0	0	0	0	0	0	0	0	0	0	0	0	0	0	0	0	0	0	0	0	0	0	0	0	0	0	0	0	0	0	0	0	0	0	0	0	0	0	0	0	0
OTU_2634	0	0	0	0	0	0	0	0	0	0	0	0	0	0	0	0	0	0	0	0	0	0	0	0	0	0	0	0	0	0	0	0	0	0	0	0	0	0	0	0	0	0	0	0	0	0	0	0	0
OTU_2635	0	0	4.24773e-05	0	0	0	0	0	0	0	0	0	0	0	0	8.49545e-05	0	4.24773e-05	0	4.24773e-05	0.000127432	4.24773e-05	0	0	0.000339818	0	0	0.00046725	0.000169909	0.00046725	0.000127432	0.000127432	0	0	0	4.24773e-05	0	0	8.49545e-05	4.24773e-05	4.24773e-05	0	4.24773e-05	0	0.000127432	8.49545e-05	0	0.000127432	0
OTU_2636	0	0	0	0	0	0	0	4.24773e-05	0	4.24773e-05	0	0	0	0	0	0	0	4.24773e-05	0	0	0	0.000127432	0	0	0	0	0	0	8.49545e-05	0	4.24773e-05	0	0	0	0	4.24773e-05	0	4.24773e-05	0	0	0	0	0	0	0	0	4.24773e-05	4.24773e-05	0.000127432
OTU_2637	0	0	0	0	0	0	0	0	0	0	0	0	0	0	0	0	0	0	0	0	8.49545e-05	0	0	0	0	0	0	0	0	0.000127432	0	0	0	0	4.24773e-05	0	0	0	0	0	0	0	0.000127432	0.00395039	0	0	4.24773e-05	4.24773e-05	0
OTU_2638	0	0	0	0	0	0	0	0	0	0	0	0	0	0	0	0	0	0	0	0	0	0	0	0	0	0	0	0	0	0	0	0	0	0	0	0	0	0	0	0	0	0	0	0	0	0	0	0	0
OTU_2639	0	0	0	0	8.49545e-05	0	4.24773e-05	4.24773e-05	0	0.00165661	0.000849545	4.24773e-05	0.000212386	0.000679636	0.000212386	0	0	0	0	0	0	0	0	0	0	0	0	0	0	0	0	0	0	0	0	0	0	0	0	0	0	0	0	0	0	0	0	0	4.24773e-05
OTU_264	0	0	0	0	0	0	0	0	0	0	0	0	0	0	0	0	0	0	0	0	0	0	0	0	0	0	0	0	0	0	0	0	0	0	0	0	0	0	0	0	0	0	0	0	0	0	0	0	0
OTU_2640	0	0	4.24773e-05	0	0	0	0	0	0	0	0.000169909	0.000212386	0	0	0	0	0	0	0	0	0	0	0	0	0	0	0	0	0	0	0	0	0	0	0	0	0	0	0	0	0	0	0.000722114	0.000849545	0.00288845	0	4.24773e-05	0	4.24773e-05
OTU_2641	0	4.24773e-05	0.000127432	8.49545e-05	4.24773e-05	4.24773e-05	8.49545e-05	0.000169909	0.000127432	0.000382295	8.49545e-05	4.24773e-05	8.49545e-05	0	0.000127432	4.24773e-05	0	0	0	0	0	0.000127432	0.000127432	4.24773e-05	0	4.24773e-05	0	4.24773e-05	0	4.24773e-05	0.000127432	8.49545e-05	0.000169909	0.000169909	0	0	0	0.000254864	0	8.49545e-05	4.24773e-05	4.24773e-05	0	4.24773e-05	0	0	0	0	0.000169909
OTU_2642	0	0	0	0	0	0	0	0	0	0	0	0	0	0	0	0	0	0	0	0	0	0	0	0	4.24773e-05	0	0	0	0	0	0	0	0	0	0	0	0	0	0	0	0	0	0.00101945	4.24773e-05	0.00140175	0	0	0	0
OTU_2643	0	0	0	0	0	0	0	0	0	0	0	0	0	0	0	0	0	0	0	0	0	0	0	0	4.24773e-05	0	0	0	0.000169909	0	4.24773e-05	0	0	0	0	0	0.000127432	0.000382295	0.000254864	0	0	4.24773e-05	0	0	0	0	0	0	0
OTU_2644	0	0	0	0	0	0	0	0	0	0	0	0	0	0	0	0	0	0	0	0	0	0	0	0	0	0	0	0	0	0	0	0	0	0	0	0	0	0	0	0	0	0	0	0	0	0	0	0	8.49545e-05
OTU_2645	0	0	0	0	0	0	0	0	0	0	0	0	0	0	0	0	0	0	0	0	0	0	0	0	0	0	0	0	0	0	0	0	0	0	0	0	0	0	0	0	0	0	4.24773e-05	0	0	0	0	0	0
OTU_2646	0	0	0	0	0	0	0	0	0	0	0	0	0	0	0	0	0	0	0	0	0	0	0	0	0	0	0	0	0	0	0	0	0	0	0	0	0	0	0	0	0	0	0	4.24773e-05	0	0	0	4.24773e-05	0
OTU_2647	0	0	0	0	0	0	0	0	0	0	0	0	0	0	0	0	0	0	0	0.000127432	8.49545e-05	0	0	0	0	0	0	0	0	0	0	0	0	0	0	0	0	0	0	0	0	0	0.00420525	0.0229377	0.00237873	0.000297341	0.000297341	0.00208139	0
OTU_2648	0	0	0	0	0	0	0	0	0	0	0	0	0	0	0	0	0	0	0	0	0	0	0	0	0	0	4.24773e-05	0	0	0	0	0	0	0	0	0	0	0	0	0	0	0	0	0	0	0	0	0	0
OTU_2649	0	0	0	0	0	0	0	0	0	0	0	0	0	0	0	0	0	0	0	0	0	0	0	0	0	0	0	0	0	0	0	0	0	0	0	0	0	0	0	0	0	0	0	0	0	0	0	0	0
OTU_265	0	0	0	0	0	0	0	0	0	0	0	0	0	0	0	0	0	0	0	0	0	0	0	0	0	0	0	0	0	0	0	0	0	0	0	0	0	0	0	0	0	0	4.24773e-05	0	0	0	0	0	0
OTU_2650	0	0	0	0	0	0	0	0	0	0	0	0	0	0	0	0	0	0	0	0	0	0	0	0	0	0	0	0	0	0	0	0	0	0	0	0	0	0	0	0	0	0	0	0	0	0	0	0	0
OTU_2651	0	0	0	0	0	0	0	0	0	0	0	0	0	0	0	0	0	0	0	0	0	0	0	0	0	0	0	0	0	0	0	0	0	0	0	0	0	0	0	0	0	0	0	0	0	0	0	0	0
OTU_2652	0	0	0	0	0	0	0	0	0	0	0	0	0	0	0	0	0	0	0	0	0	0	0	0	0	0	0	0	0	0	0	0	0	0	0	0	0	0	0	0	0	0	0	0	0	0	0	0	0
OTU_2653	0	0	0	0	0	0	0	0	0	0	0	0	0	0	0	0	0	0	0	0	0	0	0	0	0	0	0	0	0	0	0	0	0	0	0	0	0	0	0	0	0	0	0.000212386	0.00110441	8.49545e-05	0	4.24773e-05	0	0
OTU_2654	0	4.24773e-05	0	0	0	0	4.24773e-05	0	0	0.000212386	0.000169909	4.24773e-05	0	0	0	0	0	0	0	0	0	0	0	0	0	0	0	0	0	4.24773e-05	0	0	0	0	0	0	0	0	0	0	0	0	4.24773e-05	0	0	0	0	0	0
OTU_2655	0.000212386	0.00271855	0.00140175	4.24773e-05	0	0.0022513	0.0818962	0.0208139	0.000382295	0.00390791	0.0031858	0.00488489	0.00276102	0.000637159	0.00216634	0.0241271	0.00547957	0.0182228	0.062654	0.0820661	0.135163	0.0033557	0.00331323	0.00390791	0.0360207	0.0402685	0.0483391	0.00764591	0.00798573	0.0113414	0.0104494	0.0101945	0.00586186	0.0637159	0.124204	0.0918783	0.123694	0.0353411	0.265483	0.0172033	0.0423498	0.0237023	0.00981225	0.0104069	0.00407782	0.00632911	0.00314332	0.00513975	0.000594682
OTU_2656	0	0	0	0	0	0	0	0	0	0	0	0	0	0	0	0	0	0	0	0	4.24773e-05	0	0	0	8.49545e-05	0	0	0	0	0	0	0	0	0	0	4.24773e-05	0	0	0	0	0	0	0.00433268	0.00424773	0.00722114	0.000254864	0.000254864	0.0009345	0
OTU_2657	0	0	0	0	0	0	0	0	0	0	0	0	0	0	0	0	0	0	0	0	0	0	0	0	0	0	0	0	0	0	0	0	0	0	0	0	0	0	0	0	0	0	0	0	0	0	0	0	0
OTU_2658	0	0	0	0	0	0	0	0	0	0	0	0	0	0	0	0	0	0	0	0	0	0	0	0	0	0	0	0	0	0	0	0	0	0	0	0	0	0	0	0	0	0	0	0	0	0	0	0	0
OTU_2659	0	0	0	0	0	0	0	0	0	0	0	0	0	0	0	0	0	0	0	0	0	0	0	0	0	0	0	0	0	0	0	0	0	0	0	0	0	0	0	0	0	0	0	0	0.000212386	0	0	0	0
OTU_266	0	0	0	0	0	0	0	0	0	0	0	0	0	0	0	0	0	0	0	0	0	0	0	0	0	0	0	0	0	0	0	0	0	0	0	0	0	0	0	0	0	0	0.000254864	0.000212386	0	0	0	0	0
OTU_2660	0	0	0	0	0	0	0	0	0	0	0	0	0	0	0	0	0	0	0	0	0	0	0	0	0	0	0	0	0	0	0	0	0	0	0	0	0	0	0	0	0	0	0	0	0	0	0	0	0
OTU_2661	0	0	0	0	0	0	0	0	0	0	0	0	0	0	0	0	0	0	0	0	0	0	0	0	4.24773e-05	0	0	0	0	0	0	0	0	0	0	0	0	0	0	0	0	0	0	0	0	0	0	0	0
OTU_2662	0	0	0	0	0	0	0	0	0	0	0.000212386	0	0	0	0	0	0	0	0	0	0	0	0	0	0	0	0	0	0	0	0	0	0	0	0	0	0	0	0	0	0	0	0	0	0	0	0	0	0
OTU_2663	0	0	0	0	0	0	0	0	0	0	0	0	0	0	0	0	4.24773e-05	0	0	8.49545e-05	0	0	0	4.24773e-05	4.24773e-05	0	4.24773e-05	0	0	0	0	0	0	0	0	0	0	0	0	0	0	0	0.0065415	0.0234475	0.0103645	0.000339818	0.000254864	0.000127432	4.24773e-05
OTU_2664	0	0	0	0	0	0	0	0	0	0	0	0	0	0	0	0	0	0	0	4.24773e-05	4.24773e-05	0	0	0	0	8.49545e-05	0	0	0	0	0	0	0	4.24773e-05	0	0	0	0	0	0	0	4.24773e-05	4.24773e-05	0.000382295	0	8.49545e-05	0	0	0
OTU_2665	0	0	0	0	0	0	0	4.24773e-05	0	0	0	0	0	0	0	0	0	0	0	0	0	0	0	0	0	0	0	0	0	0	0	0	0	0	0	0	0	0	0	0	0	0	0	0	0	0	0	0	0
OTU_2666	0	0	0	0	0	0	0	0	0	0	0	0	0	0	0	0	0	0	0	0	0	0	0	0	0	0	0	0	0	0	0	0	0	0	0	0	0	0	0	0	0	0	0	0	0	0	0	0	0
OTU_2667	0	0	0	0	0	0	0	0	0	0	0	0	0	0	0	0	0	0	0	0	0	0	0	0	0	0	0	0	0	0	0	0	0	0	0	0	0	0	0	0	0	0	0	0	8.49545e-05	0	0	0	0
OTU_2669	0	0	0	0	0	0	0	0	0	0	0	0	0	0	0	0	0	0	0	0	0	0	0	0	0	0	0	0	0	0	0	0	0	0	0	0	0	0	0	0	0	0	0	0	0	0	0	0	0
OTU_2670	0	0	0	0	0	0	0	0	0	0	0	0	0	0	0	0	0	0	0	0	0	0	0	0	0	0	0	0	0	0	0	0	0	0	0	0	0	0	0	0	0	0	0	0	0	0	0	0	0
OTU_2671	8.49545e-05	4.24773e-05	0	0	8.49545e-05	0	0	4.24773e-05	0	0	0	0	0	0	0	0	0	0	0	0	0	0	0	0	0	0	0	0	0	0	4.24773e-05	0	0	0	0	0	0	0	0	0	0	0	0	0	0	0	0	0	0
OTU_2672	0	0	0	0	0	0	0	0	0	0	0	0	0	0	0	0	0	0	0	0	0	0	0	0	0	0	0	0	0	0	0	0	0	0	0	0	0	0	0	0	0	0	0	0	0	0	0	0	0
OTU_2673	0	0	0	0	0	0	0	0	0	0	0	0	0	0	0	0	0	0	0	0	0	0	0	0	0	0	0	0	0	0	0	0	0	0	0	0	0	0	0	0	0	0	0	0	0	0	0	0	0
OTU_2674	0	0	0	0	0	0	0	0	0	0	0	0	0	0	0	0	0	0	0	0	0	0	0	0	0	0	0	0	0	0	0	0	0	0	0	0	0	0	0	0	0	0	0	0	0	0	0	0	0
OTU_2675	0	0	0	0	0	0	0	0	0	0	0	0	0	0	0	0	0	0	0	0	0	0	0	0	0	0	0	0	0	0	0	0	0	0	0	0	0	4.24773e-05	0	0	0	0	0	0	0	0	0	0	0
OTU_2676	0	0	0	0	0	0	0	0	0	0	0	0	0	0	0	0	0	0	0	0	0	0	0	0	0	0	0	0	0	0	0	0	0	0	0	0	0	0	0	0	0	0	0	0	0	0	0	0	0
OTU_2677	0	0	0	0	0	0	0	0	0	0	0	0	0	0	0	0	0	0	0	0	0	0	0	0	0	0	0	0	0	0	0	0	0	0	0	0	0	0	0	0	0	0	0	0	4.24773e-05	0	0	0	0
OTU_2678	0	0	0	0	0	0	0	0	0	0	0	0	0	0	0	0	0	0	0	0	0	0	0	0	0	0	0	0	0	0	0	0	0	0	0	0	0	0	0	0	0	0	0	0	0	0	0	0	0
OTU_2679	0	0	0	0	0	0	0	0	0	0	0	0	0	0	0	0	0	0	0	0	0	0	0	0	0	0	0	0	0	0	0	0	0	0	0	0	0	0	0	0	0	0	0	0	0	0	0	0	0
OTU_268	0	0	0	0	0	0	0	0	0	0	0	0	0	0	0	0	0	0	0	0	0	0	0	0	0	0	0	0	0	0	0	0	0	0	0	0	0	0	0	0	0	0	0.000254864	0	0	0	4.24773e-05	0	0
OTU_2680	0	0	0	0	0	0	0	0	0	0	0	0	0	0	0	0	0	0	0	0	0	0	0	0	0	0	0	0	0	0	0	0	0	0	0	0	0	0	0	0	0	0	0	4.24773e-05	0	0	0	0	4.24773e-05
OTU_2681	0	0	0	0	0	0	0	0	0	0	0	0	0	0	0	0	0	0	0	0	0	0	0	0	0	0	0	0	0	0	0	0	0	0	0	0	0	0	0	0	0	0	0	0	4.24773e-05	0	0	0	0
OTU_2682	0	0	0	0	0	0	0	0	0	0	0	0	0	0	0	0	0	0	0	0	0	0	0	0	4.24773e-05	0	0	0	0	0	0	0	0	0	0	0	0	0	0	0	0	0	0.000382295	0.000382295	0.000127432	0	4.24773e-05	0	0
OTU_2683	0	0	0	0	0	0	0	0	0	8.49545e-05	0	8.49545e-05	4.24773e-05	0	0	0	0	0	0	0	0	0	0	0	0	0	0	0	0	0	0	0	0	0	0	0	0	0	0	0	0	0	0.000127432	0.000552205	0.000127432	0	0	0	0
OTU_2684	0	0	0	0	0	0	0	0	0	0	0	0	0	0	0	0	0	0	0	0	0	0	0	0	0	0	0	0	0	0	0	0	0	0	0	0	0	0	0	0	0	0	0	0	0	0	0	0	0
OTU_2685	0	0	0	0	0	0	0	0	0	0	0	0	0	0	0	0	0	0	0	0	0	0	0	0	0	0	0	0	0	0	0	0	0	0	0	0	0	0	0	0	0	0	0	0	0	0	0	0	0
OTU_2686	0	0	0	0	0	0	0	0	0	0	4.24773e-05	0	0	0	0	0	4.24773e-05	0	0	0	0	0	0	0	0	0	0	0	0	0	0	0	0	0	0	0	0	0	0	0	0	0	0	0	0	0	0	0	0
OTU_2687	0	0	0	0	0	0	0	0	0	4.24773e-05	0	0	0	0	0	0.000807068	4.24773e-05	0.00046725	0	0	0	0.000637159	0.00123184	0.000297341	0	0.000127432	4.24773e-05	4.24773e-05	4.24773e-05	0	0	0	0	0.000212386	0.000892023	0.00174157	0	0	0	0	0	0	0	0	0	4.24773e-05	4.24773e-05	0	0
OTU_2688	0	0	0	4.24773e-05	0	0	0	0	0	0	0	0	0	0	0	0	4.24773e-05	0	0	0	0	0	0	0	0	0	0	0	4.24773e-05	0	0	0	0	0	0	4.24773e-05	0	0	0	0	0	0	0	0	0	4.24773e-05	4.24773e-05	0	0
OTU_2689	0	0	0	0	0	0	0	0	0	0	0	0	0	0	0	0	0	0	0	0	0	0	0	0	0	0	0	0	0	0	0	0	0	0	0	0	0	0	0	0	0	0	0	0	0	0	0	0	4.24773e-05
OTU_269	0	0	0	0	0	0	0	0	0	0	0	0	0	4.24773e-05	0	0	0	0	0	0	0	0	0	0	0	0	0	0	0	0	0	0	0	0	0	0	0	0	0	0	0	0	0	0	0	0	0	0	0
OTU_2691	0	0	0	0	0	0	0	0	0	0	0	0	0	0	0	0	0	0	0	0	0	0	0	0	0	0	0	0	0	0	0	0	0	0	0	0	0	0	0	0	0	0	0	0	0	0	0	0	0
OTU_2692	0	0	0	0	0	0	0	0	0	0	0	0	0	0	0	0	0	0	0	0	0	0	0	0	0	0	0	0	0	0	0	0	0	0	0	0	0	0	0	0	0	0	0.000127432	0	0	0	0	0	0
OTU_2693	0	0	0	0	0	0	0	0	0	0	0	0	0	0	0	0	0	0	0	0	0	0	0	0	0	0	0	0	0	0	0	0	0	0	0	0	0	0	0	0	0	0	0	4.24773e-05	4.24773e-05	0	0	0	0
OTU_2694	0	0	0	0	0	0	0	0	0	0	0	0	0	0	0	0	0	0	0	0	0	0	0	0	0	0	0	0	0	0	0	0	0	0	0	0	0	0	0	0	0	0	0	0	0.000212386	0	0	0	0
OTU_2695	0	0	0	0	0	0	0	0	0	0	0.000169909	0	0	0	0	0	0	0	0	0	0	0	0	0	0	0	0	0	0	0	0	0	0	0	0	0	0	0	0	0	0	0	0	0	0	0	0	0	0
OTU_2696	0	0	0	0	0	0	0	0	0	0	0	0	0	0	0	0	0	0	0	0	0	0	0	0	0	4.24773e-05	0	0	0	0	0	0	0	0	0	0	0	0	0	0	0	0	0	0	0	0	0	0	0
OTU_2697	0	0	0	0	0	0	0	0	0	0	0	4.24773e-05	0	0	4.24773e-05	0	0	0	0	0	0	0	0	0	0	0	0	0	0	0	0	0	0	0	0	0	0	0	0	0	0	0	0	0	0	0	0	0	0
OTU_2699	0	0	0	0	0	0	0	0	0	0	0	0	0	0	0	0	0	0	0	0	0	0	0	0	0	0	0	0	0	0	0	0	0	0	0	0	0	0	0	0	0	0	0	0	0	0	0	0	0
OTU_27	0	0	0	0	0	0	0	0	0	0	0	0	0	0	0	0	0	0	0	0	0	0	0	0	0	0	0	0	0	0	0	0	0	0	0	0	0	0	0	0	0	0	0	0	0	0	0	0	0
OTU_270	0	0	0	0	0	0	0	0	0	0	0	0	0	0	0	0	0	0	0	0	0	0	0	0	0	0	0	0	0	0	0	0	0	0	0	0	0	0	0	0	0	0	0	0	0	0	0	0	0
OTU_2701	0	0	0	0	0	0	0	0	0	0	0	0	0	0	0	0	0	0	0	0	0	0	0	0	0	0	0	0	0	0	0	0	0	0	0	0	0	0	0	0	0	0	0	0	0	0	0	0	0
OTU_2702	0	0	0	0	0	0	0	0	0	0	0	0	0	0	0	0	0	0	0	0	0	0	0	0	0	0	0	0	0	0	0	0	0	0	0	0	0	0	0	0	0	0	0	0	0	0	0	0	0
OTU_2703	0	0	0	0	0	0	0	0	0	0	0	0	0	0	0	0	0	0	0	0	0	0	0	0	0	0	0	0	0	0	0	0	0	0	0	0	0	0	0	0	0	0	0	0	0	0	0	4.24773e-05	0
OTU_2704	0	0	0	0	0	0	0	0	0	0	0	0	0	0	0	0	0	0	4.24773e-05	0	0	0	4.24773e-05	0	0.000127432	0	0	0	4.24773e-05	0	4.24773e-05	4.24773e-05	0	0	0	0	0	0	0	0	0	0	0	0	4.24773e-05	0	0	4.24773e-05	0
OTU_2705	0	0	0	0	0	0	0	0	0	0	0	0	0	0	0	0	0	0	0	0	0	0	0	0	0	0	0	0	0	0	0	0	0	0	0	0	0	0	0	0	0	0	0	0	0	0	0	0	0
OTU_2707	4.24773e-05	0	0	0	0	0	0	0	0	0	0	0	0	0	4.24773e-05	0	0	0	0	0	0	0	0	0	0	4.24773e-05	0	0.000127432	4.24773e-05	0	0	8.49545e-05	0	0	0	0	0	0	0	0	0	0	0	0	0	0	0	0	0
OTU_271	0	0	0	0	0	0	0	0	0	0	0	0	0	0	0	0	0	0	0	0	0	0	0	0	0	0	0	0	0	0	0	0	0	0	0	0	0	0	0	0	0	0	0	0	0	0	0	0	0
OTU_2710	0	0	0	0	0	0	0	0	0	0	0	0	0	0	0	0	0	0	0	0	0	0	0	0	0	0	0	0	0	0	0	0	0	0	0	0	0	0	0	0	0	0	0.00135927	0	0	4.24773e-05	4.24773e-05	0	0
OTU_2711	0	0	0	0	0	0	0	0	0	0	0	0	0	0	0	0	0	0	0	0	0	0	0	0	0	0	0	0	0	0	0	0	0	0	0	0	0	0	0	0	0	0	0	0	0	0	0	0	0
OTU_2712	0	0	0	0	0	0	0	0	0	0	0	0	0	0	0	4.24773e-05	8.49545e-05	0	0	0.000169909	0	0	0	0	0	0	0	0	0	0	0	0	0	0	0	0	4.24773e-05	0	0	0	0	0	4.24773e-05	0	8.49545e-05	0	0	0	0
OTU_2713	0	0	0	0	0	0	0	0	0	0	0	0	0	0	0	0	0	0	0	0	0	0	0	0	0	0	0	0	0	0	0	0	0	0	0	0	0	0	0	0	0	0	0	0	0	0	0	0	0
OTU_2714	0.000127432	0.000169909	0	0	0	4.24773e-05	0	4.24773e-05	0	0	0	4.24773e-05	0	4.24773e-05	0	0.00110441	0.000254864	0.000679636	0	0	0	4.24773e-05	0	0	0	0	0	0	8.49545e-05	0	4.24773e-05	4.24773e-05	0.000424773	4.24773e-05	0	0	0	0	0	0	0	0.000212386	0.000509727	8.49545e-05	0.000382295	8.49545e-05	8.49545e-05	0.000169909	0
OTU_2715	0	0	0	0	0	0	0	0	0	0	0	0	0	0	0	0	0	0	0	0	0	0	0	0	0	0	0	0	0	0	0	0	0	0	0	0	0	0	0	0	0	0	0.000169909	0	0	0	0	0	0
OTU_2716	0	0	0	0	0	0	0	0	0	0	0	0	0	0	0	0	0	0	0	0	0	0	0	0	0	0	0	0	0	0	0	0	0	0	0	0	0	0	0	0	0	0	0.000849545	0.000254864	0.000297341	4.24773e-05	4.24773e-05	0	0.000169909
OTU_2717	0	0	0	0	0	0	0	0	0	0	0	0	0	0	0	0	0	0	0	0	0	0	0	0	0	0	0	0	0	0	0	0	0	0	0	0	0	0	0	0	0	0	0	0	4.24773e-05	0	0	0	0
OTU_2718	0	0	0	0	0	0	0	0	0	0	0	0	0	0	0	0	0	0	0	0	0	0	0	0	0	0	0	0	0	0	0	0	0	0	0	0	0	0	0	0	0	0	0	0	0	0	0	0	0
OTU_2719	0.000127432	0.000169909	0	0	0	0	4.24773e-05	0	0	0	0	0	0	8.49545e-05	0	0	0	0	0	0	0	4.24773e-05	0	0	0	0	0	0	0	0	0	0	0.000127432	0	0	0	0	0	0	0	4.24773e-05	8.49545e-05	0	0	0	0	0	0	0
OTU_272	0	0	0	0	0	0	0	0	0	0	0	0	0	0	0	0	0	0	0	0	0	0	0	0	0	0	0	0	0	0	0	0	0	0	0	0	0	0	0	0	0	0	0	0	0	0	0	0	0
OTU_2720	0	0	0	0	0	0	0	0	0	0	0	0	0	0	0	0	0	0	0	0	0	0	0	0	0	0	0	0	0	0	0	0	0	0	0	0	0	0	0	0	0	0	0	0	0	0	0	0	0
OTU_2721	0	0	0	0	0	0	0	0	0	0	0	0	0	0	0	0	0	0	0	0	0	0	0	0	0	0	0	0	0	0	0	0	0	0	0	0	0	0	0	0	0	0	0	0.000127432	0.000297341	0	0	0	0
OTU_2722	0	0	0	0	0	0	0	0	0	0	0	0	0	0	0	0	0	0	0	0	0	0	0	0	0	0	0	0	0	0	0	0	0	0	0	0	0	0	0	0	0	0	0	0	4.24773e-05	0	0	0	0
OTU_2723	0	0	0	0	0	0	0	0	0	0	0	0	0	0	0	0	0	0	0	0	0	0	0	0	0	0	0	0	0	0	0	0	0	0	0	0	0	0	0	0	0	0	0	0	0	0	0	0	0
OTU_2724	0	0	0	0	0	0	0	0	0	0	0	0	0	0	0	0	0	0	0	0	0	0	0	0	0	0	0	0	0	0	0	0	0	0	0	0	0	0	0	0	0	0	0	0	0	0	0	0	0
OTU_2725	0	0	0	0	0	0	0	0	0	0	0	0	0	0	0	0	0	0	0	0	0	0	0	0	0	0	0	0	0	0	0	0	0	0	0	0	0	0	0	0	0	0	0	0	4.24773e-05	0	4.24773e-05	0	0
OTU_2726	0	0	0	0	0	0	0	0	0	0	0	0	0	0	0	0	0	4.24773e-05	0	0	0	0	0	0	0	0	0	0	0	0	0	0	0	0	0	0	0	0	0	0	0	0	0	0	0	0	0	0	0
OTU_2727	0	0	0	0	0	0	0	0	0	0	0	0	0	0	0	0	0	0	0	0	0	0	0	0	0	0	0	0	0	0	0	0	0	0	0	0	0	0	0	0	0	0	8.49545e-05	0.000127432	4.24773e-05	0	0	0	0
OTU_2728	0	0	0	0	0	0	0	0	0	0	0	0	0	0	0	0	0	0	0	0	0	0	0	0	0	4.24773e-05	0	0	0	0	0	0	0	0	0	0	0	0	0	0	0	0	0	0	0	0	0	0	0
OTU_2729	0	0	0	0	0	0	0	0	0	0	0	0	0	0	0	0	0	0	0	0	0	0	0	0	0	0	0	0	0	0	0	0	0	0	0	0	0	0	0	0	0	0	0	0	8.49545e-05	0	0	0	0
OTU_2730	0	0	0	0	0	0	0	0	0	0	0	0	0	0	0	0	0	0	0	0	0	0	0	0	0	0	0	0	0	0	0	0	0	0	0	0	0	0	0	0	0	0	0	0	0	0	0	0	0
OTU_2731	0	0	0	0	0	0	0	0	0	0	0	0	0	0	0	0	0	0	0	0	0	0	0	0	0	0	0	0	0	0	0	0	0	0	0	0	0	0	0	0	0	0	0	0	0	0	0	0	0
OTU_2732	0	0	0	0	0	0	0	0	0	0	0	0	0	0	0	0	0	0	0	0	0	0	0	0	0	0	0	0	0	0	0	0	0	0	0	0	0	0	0	0	0	0	0	0	0	0	0	0	0
OTU_2734	0	0	0	0	0	0	0	0	0	0	0	0	0	0	0	0	0	0	0	4.24773e-05	0	0	0	0	0.000169909	0	0	0	8.49545e-05	0	0	0	0	0	0	0	0	0	0	0	0	0	0.00717866	0.0126582	0.0135927	0.0013168	0.00106193	0.000339818	0
OTU_2735	0	0	0	0	0	0	0	0	0	0	0	0	0	0	0	0	0	0	0	0	0	0	0	0	0	0	0	0	0	0	0	0	0	0	0	0	0	0	0	0	0	0	0	0	0	0	0	0	0
OTU_2737	0	0	0	0	0	0	0	0	0	0	0	0	0	0	0	4.24773e-05	0	0	0	0	0	0	0	0	0	0	0	0	0	0	0	0	0	0	0	0	0	0	0	0	0	0	0	0	8.49545e-05	0	0	0	0
OTU_2738	0	0	0.000212386	0	0	0	0	0	0	0	0	0	0	0	0	0	0	0	0	0	0	0	0	0	0	0	0	0	8.49545e-05	0	0	4.24773e-05	0	0	0	8.49545e-05	0	0	4.24773e-05	0	0	0	0.000552205	0.00152918	0.00106193	0	0.000339818	8.49545e-05	0.000127432
OTU_2739	0	0	0	0	0	0	0	0	0	0	0	0	0	0	0	0	0	0	0	0	0	0	0	0	0	0	0	0	0	0	0	0	0	0	0	0	0	0	0	0	0	0	0	0	0	0	0	0	0
OTU_274	0	0	0	0	0	0	0	0	0	0	0	0	0	0	0	0	0	0	0	0	0	0	0	0	0	0	0	0	0	0	0	0	0	0	0	0	0	0	0	0	0	0	0	0	0	0	0	0	0
OTU_2740	0	0	0	0	0	0	0	0	0	0	0	0	0	0	0	0	0	0	0	0	0	0	0	0	0	0	0	0	0	0	0	0	0	0	0	0	0	0	0	0	0	0	0.000254864	8.49545e-05	0	0	0	0	0
OTU_2741	0	0	0	0	0	0	0	0	0	0	0	0	0	0	0	0	0	0	0	0	0	0	0	0	0	0	0	0	0	0	0	0	0	0	0	0	0	0	0	0	0	0	0	0	0	0	0	0	0
OTU_2742	0	0	0	0	0	0	0	0	0	0	0	0	0	0	0	0	0	0	0	0	0	0	0	0	0	0	0	0	0	0	0	0	0	0	0	0	0	0	0	0	0	0	0	0	0	0	0	0	0
OTU_2743	0	0	0	0	0	0	0	0	0	0	0	0	0	0	0	0	0	0	0	0	0	0	0	0	0	0	0	0	0	0	0	0	0	0	0	0	0	0	0	0	0	0	0	0	0	0	0	0	0
OTU_2744	0	0	0	0	0	0	0	0	0	0	0	0	0	0	0	0	0	0	0	0	0	0	0	0	0	0	0	0	0	0	0	0	0	0	0	0	0	0	0	0	0	0	0	0	0	0	0	0	0
OTU_2745	0	0	0	0	0	0	0	0	0	0	0	0	0	0	0	0	0	0	0	0	0	0	0	0	0	0	0	4.24773e-05	0	0	0	0	0	0	0	0	0	0	0	0	0	0	0	0	0	0	0	0	0
OTU_2747	0	0	0	0	0	0	0	0	0	0	0	0	0	0	0	0	0	0	0	0	0	0	0	0	0	0	0	0	0	0	0	0	0	0	0	0	0	0	0	0	0	0	0.000212386	8.49545e-05	0	0	0	0	0
OTU_2748	0	0	4.24773e-05	0	0	0	0	0	0	0	0	0	0	0	0	0	0	0	0	4.24773e-05	8.49545e-05	0	0	0	0	0	4.24773e-05	0	0	0	0	0	0	0	4.24773e-05	4.24773e-05	0	0	0	0	0	0	8.49545e-05	0.000254864	4.24773e-05	0	4.24773e-05	4.24773e-05	0
OTU_275	0	0	0	0	0	0	0	0	0	0	0	0	0	0	0	0	0	0	0	0	0	0	0	0	0	0	0	0	0	0	0	0	0	0	0	0	0	0	0	0	0	0	0	0	0	0	0	0	0
OTU_2750	0	0	0	0	0	0	0	0	0	0	0	0	0	4.24773e-05	0	0	0	0	0	0	0	0	0	0	0	4.24773e-05	0	0	0	0	4.24773e-05	0.000169909	0	8.49545e-05	0.000424773	0	0	0	0	0	0	0	0	0	0	0	0	0	0
OTU_2751	0	0	0	0	0	0	0	0	0	0	0	0	0	0	0	0	0	0	0	8.49545e-05	0	0	0	0	0	0	0	0	0	0	0	0	0	0	0	0	0	0	0	0	0	0	0	0	0	0	0	0	0
OTU_2752	0	0	0	0	0	0	0	0	0	0	0	0	0	0	0	0	0	0	0	0	0	0	0	0	0	0	0	0	0	0	0	0	0	0	0	0	0	0	0	0	0	0	0	0	0	0	0	0	0
OTU_2754	0	0	0	0	0	0	0	0	0	0	0	0	0	0	0	0	0	0	0	0	0	0	0	0	0	0	0	0	0	0	0	0	0	0	0	0	0	0	0	0	0	0	0	0	0	0	0	0	0
OTU_2755	0	0	0	0	0	0	0	0	0	0	0	0	0	0	0	0	0	0	0	0	0	0	0	0	0	0	0	0	0	0	0	0	0	0	0	0	0	0	0	0	0	0	0	0	0	0	0	0	0
OTU_2756	0	0	0	0	0	0	0	0	0	0	0	0	0	0	0	0	0	0	0	0	0	0	0	0	0	0	0	0	0	0	0	0	0	0	0	0	0	0	0	0	0	0	0	0	0	0	0	0	0
OTU_2757	0	0	0	0	0	0	0	0	0	0	0	0	0	0	0	0	0	0	0	0	0	0	0	0	0	0	0	0	0	0	0	0	0	0	0	0	0	0	0	0	0	0	0	0	0	0	0	0	0
OTU_2758	0	0	0	0	0	0	0	0	0	0	0	0	0	0	0	0	0	0	0	0	0	0	0	0	0	0	0	0	0	0	0	0	0	0	0	0	0	0	0	0	0	0	0	0	0	0	0	0	0
OTU_2759	0	0	0	0	0	0	0	0	0	0	0	0	0	0	0	0	0	0	0	0	0	0	0	0	0	0	0	0	0	0	0	0	0	0	0	0	0	0	0	0	0	0	0	0	0	0	0	0	0
OTU_276	0	0	0	0	0	0	0	0	0	0	0	0	0	0	0	0	0	0	0	0	0	4.24773e-05	0	0	0	0	0	0	0	0	0	0	0	0	0	0	0	0	0	0	0	0	0	0	0	0	0	0	0
OTU_2760	0	0	0	0	0	0	0	0	0	0	0	0	0	0	0	0	0	0	0	0	0	0	0	0	0	0	0	0	0	0	0	0	0	0	0	0	0	0	0	0	0	0	0	0	0	0	0	0	0
OTU_2762	0	0	0	0	0	0	4.24773e-05	0	0	0	0	0	0	0	4.24773e-05	0	0	0	4.24773e-05	0	4.24773e-05	0	0	0	4.24773e-05	0	0	0	0	0	0	0	0	0	4.24773e-05	0	8.49545e-05	0	0	0	0	0	0	8.49545e-05	4.24773e-05	0	0	8.49545e-05	0
OTU_2763	0	0	0	0	0	0	0	0	0	0	0	0	0	0	0	0	0	0	0	0	0	0	0	0	0	0	0	0	0	0	0	0	0	0	0	0	0	0	0	0	0	0	0	0	0	0	0	0	0
OTU_2764	0	0	0	0	0	0	0	0	0	0	0	0	0	0	0	0	0	0	0	0	0	0	0	0	0	0	0	0	0	0	0	0	0	0	0	0	0	0	0	0	0	0	0	0	0	0	0	0	0
OTU_2767	0	0	0	0	0	0	0	0	0	0	0	0	0	0	0	0	0	0	0	0	0	0	0	0	0	0	0	0	0	0	0	0	0	0	0	0	0	0	0	0	0	0	0	0	0	0	0	0	0
OTU_2768	0	0	0	0	0	0	0	0	0	0	0	0	0	0	0	0	0	0	0	0	0	0	0	0	0	0	0	0	0	0	0	0	0	0	0	0	0	0	0	0	0	0	0	0	0	0	0	0	0
OTU_2769	0	0	0	0	0	0	0	0	0	0	0	0	0	0	0	0	0	0	0	0	0	0	0	0	0	0	0	0	0	0	0	0	0	0	0	0	0	0	0	0	0	0	0	0	0	0	0	0	0
OTU_277	0	0	0	0	0	0	0	0	0	0	0	0	0	0	0	0	0	0	0	0	0	0	0	0	0	0	0	0	0	0	0	0	0	0	0	0	0	0	0	0	0	0	0	0	0	0	0	0	0
OTU_2770	0	0	0	0	0	0	0	0	0	0	0	0	0	0	0	0	0	0	0	0	0	0	0	0	0	0	0	0	0	0	0	0	0	0	0	0	0	0	0	0	0	0	0	0	0	0	0	0	0
OTU_2772	0	0	0	0	0	0	0	0	0	0	0	0	0	0	0	0	0	0	0	0	0	0	0	0	0	0	0	0	0	0	0	0	0	0	0	0	0	0	0	0	0	0	0	0	0	0	0	0	0
OTU_2773	0	0	0	0	0	0	0	0	0	0	0	0	0	0	0	0	0	0	0	0	0	0	0	0	0	0	0	0	0	0	0	0	0	0	0	0	0	0	0	0	0	0	0	8.49545e-05	0	0	0	0	0
OTU_2774	0	0	0	0	0	0	0	0	0	0	0	4.24773e-05	0	0	0	0	0	0	0	0	0	0	0	0	0	0	0	0	0	0	0	0	0	0	0	0	0	0	0	0	0	0	0	0	0	0	0	0	0
OTU_2775	0	0	0	0	0	0	0	0	0	0	0	0	0	0	0	0	0	0	0	0	0	0	0	0	0	0	0	0	0	0	0	0	0	0	0	0	0	0	0	0	0	0	0	0	0	0	0	0	0
OTU_2776	0	0	0	0	0	0	0	0	0	0	0	0	0	0	0	0	0	0	0	0	0	0	0	0	0	0	0	0	0	0	0	0	0	0	4.24773e-05	0	0	0	0	0	0	0	0	4.24773e-05	4.24773e-05	0	0	0	0
OTU_2777	0	0	0	0	0	0	0	0	0	0	0	0	0	0	0	0	0	0	0	0	0	0	0	0	0	0	0	0	0	0	0	0	0	0	0	0	0	0	0	0	0	0	0	0	0.000127432	8.49545e-05	0	0	4.24773e-05
OTU_2778	0	0	0	0	0	0	0	0	0	0	0	0	0	0	0	0	0	0	0	0	0	0	0	0	0	0	0	0	0	0	0	0	0	0	0	0	0	0	0	0	0	0	0	0	0	0	0	0	0
OTU_2779	0	0	0	0	0	0	0	0	0	0	0	0	0	0	0	0	0	0	0	0	0	0	0	0	0	0	0	0	0	0	0	0	0	0	0	0	0	0	0	0	0	0	0	0	0	0	0	0	0
OTU_278	0	0	0	0	0	0	0	0	0	0	0	0	0	0	0	0	0	0	0	0	0	0	0	0	0	0	0	0	0	0	0	0	0	0	0	0	0	0	0	0	0	0	0	0	0	0	0	0	0
OTU_2780	0	0	0	0	0	0	0	0	0	0	0	0	0	0	0	0	0	0	0	8.49545e-05	0	0	0	0	0	0	0	0	0	0	0	0	0	0	0	0	0	0	0	0	0	0	0	0	0	0	0	0	0
OTU_2781	0	4.24773e-05	4.24773e-05	0	0	8.49545e-05	8.49545e-05	4.24773e-05	4.24773e-05	0.00106193	0.00212386	0.000722114	0.000722114	0.000679636	0.000807068	0	0	0	0	0	0	0	0	4.24773e-05	0	0	0	0	0	0	0	0	0	0	0	0	0	4.24773e-05	0	0	0	0	0	4.24773e-05	4.24773e-05	0	0	0	0
OTU_2782	0	0	0	0	0	0	0	0	0	0	0	0	0	0	0	0	4.24773e-05	0	0	0	0	0	0	0	0	0	0	0	0	0	0	0	0	0	0	0	4.24773e-05	0	0	0	0	0	0	0	0	0	0	0	0
OTU_2783	0	0	0	0	0	0	0	0	0	0	0	0	0	0	0	0	0	0	0	0	0	0	0	0	0	0	0	0	0	0	0	0	0	0	0	0	0	0	0	0	0	0	4.24773e-05	0.000212386	0.00191148	0	0	0	0
OTU_2784	0	0	0	0	0	0	0	0	0	0	0	0	0	4.24773e-05	0	0	0	0	0	0	0	0	0	0	0	0	0	0	0	0	0	0	0	0	0	0	0	0	0	0	0	0	8.49545e-05	0	0	0	0	0	0
OTU_2785	0	0	0	0	0	0	0	0	0	0	0	0	0	0	4.24773e-05	0	0	0	0	0	0	0	0	0	0	0	0	0	0	0	0	0	0	0	0	0	0	0	0	0	0	0	0	0	0	0	0	0	0
OTU_2786	0	0	0	0	0	0	0	0	0	0	0	0	0	0	0	0	0	0	0	0	0	0	0	0	0	0	0	0	0	0	0	0	0	0	0	0	0	0	0	0	0	0	0	0	0	0	0	0	0
OTU_2787	0	4.24773e-05	0	0	0	0	0	0	0	0	0	0	0	0	0	0	0	0	0	4.24773e-05	0	0	0	0	0	0	0	0	0	0	0	0	0	0	0	0	0	0	0	0	0	0.000127432	0	0	0	0	0	0	0
OTU_2788	0	0	0	0	0	0	0	0	0	0	0	0	0	0	0	0	0	0	0	0	0	0	0	0	0	0	4.24773e-05	0	0	0	0	0	0	0	0	0	0	0	0	0	0	0	0	0	0	0	0	0	0
OTU_2789	0	0	0	0	4.24773e-05	0	0	0	0	0	0	0	0	0	0	0	0	0	0	0	0	0	0	0	0	0	0	0	4.24773e-05	0	0	0	0	0	0	4.24773e-05	0	0	0	0	0	0	0.000254864	0.000212386	0.000637159	8.49545e-05	0.000297341	0.000297341	0
OTU_2790	0	0	0	0	0	0	0	0	0	4.24773e-05	0	0	4.24773e-05	0	0	0	0	0	0	0	0	0	0	0	0	0	0	0	0	0	0	0	0	0	0	0	0	0	0	0	0	0	0	4.24773e-05	0	0	0	0	0
OTU_2791	0	4.24773e-05	0	0	0	0	0	8.49545e-05	0	4.24773e-05	0	0	4.24773e-05	0	0	0	0	0	0	0	0	8.49545e-05	0	0	0	0	0	0	0	0	4.24773e-05	0	4.24773e-05	4.24773e-05	0	0	0	4.24773e-05	0	0	0	0	0	0	0	0	0	0	8.49545e-05
OTU_2792	0	0	0	0	0	0	0	0	0	0	0	0	0	0	0	0	0	0	0	0	0	0	0	0	0	0	0	0	0	0	0	0	0	0	0	0	0	0	0	0	0	0	0	0	0	0	0	0	0
OTU_2793	0	0	0	0	0	0	0	0	0	0	0	0	0	0	0	0	0	0	0	0	0	0	0	0	0	0	0	0	0	0	0	0	0	0	0	0	0	0	0	0	0	0	0	0	0	0	0	0	0
OTU_2794	0.000169909	0.000127432	0	0	0	0	4.24773e-05	0	0	0	0	0	0	0	0	0	0	0	0	0	0	0	0	0	0	4.24773e-05	0	0	0	0	4.24773e-05	0	4.24773e-05	0	0	0	0	0	0	0	0	8.49545e-05	0	0	0	0	0	4.24773e-05	0
OTU_2795	0	0	0	0	0	0	0	0	0	0	0	0	0	0	0	0	0	0	0	0	0	0	0	0	0	0	0	0	0	0	0	0	0	0	0	0	0	0	0	0	0	0	0	0	0	0	0	0	0
OTU_2796	0	0	0	0	0	0	0	0	0	0	0	0	0	0	0	0	0	0	0	0	0	0	0	0	0	0	0	0	0	0	0	0	0	0	0	0	0	0	0	0	0	0	0	0	0	0	0	0	0
OTU_2797	0	0	0	0	0	0	0	0	0	0	0	0	0	0	0	0	0	0	0	0	0	0	0	0	0	0	0	0	0	0	0	0	0	0	0	0	0	0	0	0	0	0	0	0	0	0	0	0	0
OTU_2798	0	0	0	0	0	0	0	0	0	0	0	0	0	0	0	0	0	0	0	0	4.24773e-05	0	0	0	0	0	0	0	0	0	0	0	4.24773e-05	0	0	0	0	0	0	0	0	4.24773e-05	0	0	0	0	0	0	0
OTU_2799	0	0	0	0	0	0	0	0	0	0	0	0	0	0	0	0	0	0	0	0	0	0	0	0	0	0	0	0	0	0	0	0	0	0	0	0	0	0	0	0	0	0	0	0	0	0	0	4.24773e-05	0
OTU_28	0	0	0	0	0	0	0	0	0	0	0	0	0	0	0	0	4.24773e-05	0	0	0	0	4.24773e-05	0	0	0	0	0	0	0	0	0	0	0	0	0	0	0	0	0	0	0	0	0	0	0	0	0	0	0
OTU_280	0	0	0	0	0	0	0	0	0	0	4.24773e-05	0	0	0	0	0	0	0	0	0	0	0	0	0	0	0	0	0	0	0	0	4.24773e-05	0	0	0	0	0	4.24773e-05	0	4.24773e-05	0	0	0	0	0	0	0	0	0
OTU_2800	0	0	0	0	0	0	0	0	0	0	0	0	0	0	0	0	0	0	0	0	0	0	0	0	0	0	0	0	0	0	0	0	0	0	0	0	0	0	0	0	0	0	0	0	0	0	0	0	0
OTU_2801	4.24773e-05	0	0	0	0	0	0	0	0	0	0	0	0	0	0	0	0	0	0	0	0	0	0	0	0	0	0	0	0	0	0	0	0	0	0	0	0	0	0	0	0	0	0.000212386	0	4.24773e-05	4.24773e-05	0	8.49545e-05	0
OTU_2802	0	0	0	0	0	0	0	0	0	0	0	0	0	0	0	0	0	0	0	0	0	0	0	0	0	0	0	0	0	0	0	0	0	0	0	0	0	4.24773e-05	0	0	0	0	0	0	0	0	0	0	0
OTU_2803	0	0	0	0	0	0	0	0	0	0	0	0	0	0	0	0	0	0	0	0	0	0	0	0	0	0	0	0	0	0	0	0	0	0	0	0	8.49545e-05	0	0	0	0	0	0	0	0	0	0	0	0
OTU_2804	0	0	0	0	0	0	0	0	0	0	0	0	0	0	0	0	0	0	0	0	0	0	0	0	0	0	0	0	0	0	0	0	0	0	0	0	0	0	0	0	0	0	0	0	0	0	0	0	0
OTU_2805	0	0	0	0	0	0	0	0	0	0	0	0	0	0	0	0	0	0	0	0	0	0	0	0	0	0	0	0	0	0	0	0	0	0	0	0	0	0	0	0	0	0	0	0	0	0	0	0	0
OTU_2806	0	0	0	0	0	0	0	0	0	0	0	0	0	0	0	0	0	0	0	0	0	0	0	0	0	0	0	0	0	0	0	0	0	0	0	0	0	0	0	0	0	0	0	0	0	0	0	0	0
OTU_2807	0	0	0	0	0	0	0	0	0	0	0	0	0	0	0	0	0	0	0	0	4.24773e-05	0	0	0	0	0	0	0	0	0	0	0	0	4.24773e-05	0.000127432	0	4.24773e-05	0	0	0	0	0	4.24773e-05	8.49545e-05	0	0	0	0	0
OTU_2808	0	0	0	0	0	0	0	0	0	0	0	0	0	0	0	0	0	0	0	0	0	0	0	0	0	0	0	0	0	0	0	0	0	0	0	0	0	0	0	0	0	0	0	0	0	0	0	0	0
OTU_2809	0	0	0	0	0	0	0	0	0	0	0	0	0	0	0	0	0	0	0	0	0	0	0	0	0	0	0	0	0	0	0	0	0	0	0	0	0	0	0	0	0	0	0	0	0	0	0	0	0
OTU_281	0	0	0	0	0	0	0	0	0	0	0	0	0	0	0	0	0	0	0	0	0	0	0	0	0	0	0	0	0	0	0	0	0	0	0	0	0	0	0	0	0	0	0	0	0	0	0	0	0
OTU_2810	0	0	0	0	0	0	0	0	0	0	0	0	0	0	0	0	0	0	0	0	4.24773e-05	0	0	4.24773e-05	4.24773e-05	0	0	0	0	0	0	0	0	0	0	0	0	0	0	0	0	0	0	0	0	4.24773e-05	0	0	0
OTU_2811	0	0	0	0	0	0	0	0	0	0	0	0	0	0	0	0	0	0	0	0	0	0	0	0	0	0	0	0	0	0	0	0	0	0	0	0	0	0	0	0	0	0	0	0	0	0	0	0	0
OTU_2812	0.000594682	0.00683884	0.00216634	0.00641407	0.000297341	0.00390791	0.0389092	0.0041203	0.323719	0.00378048	0.0041203	0.00123184	0.00284598	0.0028035	0.00471498	8.49545e-05	0.000297341	8.49545e-05	0	0.000169909	0	0.000169909	0.000254864	0.000254864	0	0.000764591	0.000509727	4.24773e-05	0.000297341	4.24773e-05	8.49545e-05	0.000212386	0.000254864	0.00046725	0	8.49545e-05	0.000169909	0.000169909	0.000169909	0.000212386	8.49545e-05	0.000509727	0.00331323	0.000339818	4.24773e-05	4.24773e-05	0.000254864	0.000127432	0.000169909
OTU_2813	0	0	0	0	0	0	0	0	0	0	0	0	0	0	0	0	0	0	0	0	0	0	0	0	0	0	0	0	0	0	0	0	0	0	0	0	0	0	0	0	0	0	0	0	0	0	0	0	0
OTU_2814	0	0	0	0	0	0	0	0	0	0	0	0	0	0	0	0	0	0	0	0	0	0	0	0	0	0	0	0	0	0	0	0	0	0	0	0	0	0	0	0	0	0	0	0	0	0	0	0	0
OTU_2815	0	0	0	8.49545e-05	0	0	0	0.000339818	0	0.000254864	0	0	0	0	0	0	0	0	0	0	0	0.000382295	0	0	0	0	0	0	0	0	0.000339818	0	0	0	0	0	0	0.000254864	0	0	0	0	0	0	0	0	0	0	0.000339818
OTU_2816	0	0	0	0	0	0	0	0	0	0	0	0	0	0	0	0	0	0	0	0	0	0	0	0	0	0	0	0	0	0	0	0	0	0	0	0	0	0	0	0	0	0	0	0	0	0	0	0	0
OTU_2817	0	0	0	0	0	0	0	0.000169909	0	0	0	0	0	0	4.24773e-05	0	0	0	4.24773e-05	0	0	0	0	0	0	0	0	0	0	0	0	0	0	0	0	0	0	0	0	0	0	0	0	4.24773e-05	0	0	0	0	0
OTU_2818	0	0	0	0	0	0	0	0	0	0	0	0	0	0	0	0.000339818	0	4.24773e-05	0	0	0	0	0	0	0	0	0	0	4.24773e-05	4.24773e-05	0	0	0	0	0	8.49545e-05	0	0	0	0	0	0	0	0	0	0	4.24773e-05	0	0
OTU_2819	0	0	0	0	0	0	0	0	0	0	0	0	0	0	0	0	0	0	0	0	0	0	0	0	0	0	0	0	0	0	0	0	0	0	0	0	0	0	0	0	0	0	0	0	0	0	0	0	0
OTU_282	0	0	0	0	0	0	0	0	0	0	0	0	0	0	0	0	0	0	0	0	0	0	0	0	0	0	0	0	0	0	0	0	0	0	0	0	0	0	0	0	0	0	0	0	0	0	0	0	0
OTU_2820	0	0	0	0	0	0	0	0	0	0	0	0	0	0	0	0	0	0	0	0	0	0	0	0	0	0	0	0	0	0	0	0	0	0	0	0	0	0	0	0	0	0	0	0	0	0	0	0	0
OTU_2821	0	0	0	0	0	0	0	0	0	0	0	0	0	0	0	0	0	0	0	0	0	0	0	0	0	0	0	0	0	0	0	0	0	0	0	0	0	0	0	0	0	0	0.000127432	4.24773e-05	4.24773e-05	0	4.24773e-05	0	0
OTU_2822	0	0	0	0	0	0	0	0	0	0	0	0	0	0	0	0	0	0	0	0	0	0	0	0	0	0	0	0	0	0	0	0	0	0	0	0	0	0	0	0	0	0	0	0	0	0	0	0	0
OTU_2823	0	0	0	0	0	0	0	0	0	0	0	0	0	0	0	0	0	0	0	0	0	0	0	0	0	0	0	0	0	0	0	0	0	0	0	0	0	0	0	0	0	0	0	0	0	0	0	0	0
OTU_2824	0	0	0	0	0	0	0	0	0	0	0	0	0	0	0	0	0	0	0	0	0	0	0	0	0	0	0	0	0	0	0	0	0	0	0	0	0	0	0	0	0	0	0	0	0	0	0	0	0
OTU_2825	0	0	0	0	0	0	0	0	0	0	0	0	0	0	0	0	0	0	0	0	0	0	0	0	0	0	0	0	0	0	0	0	0	0	0	0	0	0	0	0	0	0	0	0	0	0	0	0	0
OTU_2826	0	0.000169909	8.49545e-05	0.000212386	4.24773e-05	0.000424773	0.00858041	0.000509727	0.00437516	8.49545e-05	0.000254864	0.000212386	0.000297341	0.000127432	0.000509727	0.0014867	0.000849545	0.133039	0.000212386	4.24773e-05	0.000297341	4.24773e-05	0.000212386	8.49545e-05	8.49545e-05	8.49545e-05	8.49545e-05	4.24773e-05	4.24773e-05	0	0	0	0	0.000169909	0.000594682	0.000849545	4.24773e-05	8.49545e-05	0.000169909	4.24773e-05	0.000127432	0	0	8.49545e-05	0	8.49545e-05	4.24773e-05	4.24773e-05	0
OTU_2827	0	0	0	0	0	0	0	0	0	0	0	0	0	0	0	0	0	0	0	0	0	0	0	0	0	0	0	0	0	0	0	0	0	0	0	0	0	0	0	0	0	0	4.24773e-05	0	0	0	0	0	4.24773e-05
OTU_2828	0	0	0	0	0	0	0	0	0	0	0	0	0	0	0	0	0	0	0	0	0	0	0	0	0	0	0	0	0	0	0	0	0	0	0	0	0	0	0	0	0	0	8.49545e-05	0	0	0	0	0	0
OTU_2829	0	0	0	0	0	0	0	0	0	0	0	0	0	0	0	0	0	0	0	0	0	0	0	0	0	0	0	0	0	0	0	0	0	0	0	0	0	0	0	0	0	0	0	0	0	0	0	0	0
OTU_283	0	0	0	0	0	0	0	0	0	0	0	0	0	0	0	0	0	0	0	0	0	0	0	0	0	0	0	0	0	0	0	0	0	0	0	0	0	0	0	0	0	0	0	0	0	0	0	0	0
OTU_2830	0	4.24773e-05	0	0	0.000254864	0	0	0	0	0	0	0	4.24773e-05	0	0	0	0	0	0	0	0	0	0	0	0	0	0	0	0	0	0	0	0	4.24773e-05	0	0	0	0	0	0	0	0	0	0.000254864	4.24773e-05	0	0	4.24773e-05	0
OTU_2831	0	0	0	0	0	0	0	0	0	0	0	0	0	0	0	0	0	0	0	0	0	0	0	0	0	0	0	0	0	0	0	0	0	0	0	0	0	0	0	0	0	0	0	0	8.49545e-05	0	0	0	0
OTU_2832	0	0	0	0	0	0	0	0	0	0	0	0	0	0	0	0	0	0	0	0	0	0	0	0	0	0	0	0	0	0	0	0	0	0	0	0	0	0	0	0	0	0	4.24773e-05	0	0	0	0	0	0
OTU_2834	0	0	0	0	0	0	0	0	0	0	0	0	0	0	0	0	0	0	0	0	0	0	0	0	0	0	0	0	0	0	0	0	0	0	0	0	0	0	0	0	0	0	0	0	0	0	0	0	0
OTU_2835	0	0	0	0	0	0	0	0	0	0	0	0	0	0	0	0	0	0	0	0	0	0	0	0	0	0	0	0	0	0	0	0	0	0	0	0	0	4.24773e-05	0	0	0	0	0	0	0	0	0	0	0
OTU_2836	0	0	0	0	0	0	0	0	0	0	0	0	0	0	0	0	0	0	0	0	0	0	0	0	0	0	0	0	0	0	0	0	0	0	0	0	0	0	0	0	0	0	0	0	0	0	0	0	0
OTU_2837	0	0	0	0	0	0	0	0	0	0	0	0	0	0	0	0	0	0	0	0	0	0	0	0	0	0	0	0	0	0	0	0	0	0	0	0	0	0	0	0	0	0	0	0	0	0	0	0	0
OTU_2838	0	0	0	0	0	0	0	0	0	0	0	0	0	0	0	0	0	0	0	0	0	0	0	0	0	0	0	0	0	0	0	0	0	0	0	0	0	0	0	0	0	0	0	0	0	0	0	0	0
OTU_2839	0	0	0	0	0	0	0	0	0	0	0	0	0	0	0	0	0	0	0	0	0	0	0	0	0	0	0	0	0	0	0	0	0	0	0	0	0	0	0	0	0	0	0	0	0	0	0	0	0
OTU_284	0	0	0	0	0	0	0	0	0	0	0	0	0	0	0	0	0	0	0	0	0	0	0	0	0	0	0	0	0	0	0	0	0	0	0	0	0	0	0	0	0	0	0	0	0	0	0	0	0
OTU_2841	0	0	0	0	0	0	0	0	0	0	0	0	0	0	0	0	0	0	0	0	0	0	0	0	0	0	0	0	0	0	0	0	0	0	0	0	0	0	0	0	0	0	0	0	0	0	4.24773e-05	0	0
OTU_2843	0	0	0	0	0	0	0	0	0	0	0	0	0	0	0	0	0	0	0	0	0	0	0	0	0	0	0	0	0	0	0	0	0	0	0	0	0	0	0	0	0	0	0	0	0	0	0	0	0
OTU_2844	8.49545e-05	0.000127432	0.000424773	0.000424773	8.49545e-05	0.000212386	0.000212386	4.24773e-05	8.49545e-05	0.000254864	0.000212386	0.000637159	0.000212386	0.000127432	8.49545e-05	4.24773e-05	0.000212386	4.24773e-05	0.000254864	0.00220882	0.00114689	4.24773e-05	0.000127432	4.24773e-05	0.0013168	0.000212386	0.000424773	0.000127432	0.000637159	0.000169909	0.000169909	0.000127432	0	8.49545e-05	0.000297341	0.000339818	0.000169909	8.49545e-05	8.49545e-05	0	0	4.24773e-05	0.0265058	0.0245094	0.0232775	0.0354685	0.0406508	0.0506754	0.00959986
OTU_2845	0	0	0	0	0	0	0	0	0	0	0	0	0	0	0	0	0	0	0	0	0	0	0	0	0	0	0	0	0	0	0	0	0	0	0	0	0	0	0	0	0	0	0	0	0	0	0	0	0
OTU_2846	0	0	0	0	0	0	0	0	0	0	0	0	0	0	0	0	0	0	0	0	0	0	0	0	0	0	0	0	0	0	0	0	0	0	0	0	0	0	0	0	0	0	0	0	0	0	0	0	0
OTU_2848	0	0	0	0	0	0	0	0	0	0	0	0	0	0	0	0	0	0	0	0	0	0	0	0	0	0	0	0	0	0	0	0	0	0	0	0	0	0	0	0	0	0	0	0	0	0	0	0	0
OTU_285	0	0	0	0	0	0	0	0	0	0	0	0	0	0	0	0	0	0	0	0	0	0	0	0	0	0	0	0	0	0	0	0	0	0	0	0	0	0	0	0	0	0	0	0.000127432	0	0	0	0	0
OTU_2850	0	0	0	0	0	0	0	0	0	0	0	0	0	0	0	0	0	0	0	0	0	0	0	0	0	0	0	0	0	0	0	0	0	0	0	0	0	0	0	0	0	0	0	0	0	0	0	0	0
OTU_2851	0	0	0	0	0	0	0	0	0	0	0	0	0	0	0	0	0	0	0	0	0	0	0	0	0	0	0	0	0	0	0	0	0	0	0	0	0	0	0	0	0	0	4.24773e-05	0	0	0	0	0	0
OTU_2852	0	0	0	0	0	0	0	0	0	0	0	0	0	0	0	0	0	0	0	0	0	0	0	0	0	0	0	0	0	0	0	0	0	0	0	0	0	0	0	0	0	0	0	4.24773e-05	0	0	0	0	0
OTU_2853	0	0	0	0	0	0	0	0	0	0	0	0	0	0	0	0	0	0	0	0	0	0	0	0	0	0	0	0	0	0	0	0	0	0	0	0	0	0	0	0	0	0	0	0	0	0	0	0	0
OTU_2854	0	0	0	0	0	0	0	0	0	0	0	0	0	0	0	0	0	0	0	0	0	0	0	0	0	0	0	0	0	0	0	0	0	0	0	0	0	0	0	0	0	0	0	0	0	0	0	0	0
OTU_2855	0	0	0	0	0	0	0	0	0	0	0	0	0	0	0	0	0	0	0	0	0	0	0	0	0	0	0	0	0	0	0	0	0	0	0	0	0	0	0	0	0	0	0.000637159	0.00046725	0.000212386	4.24773e-05	0	4.24773e-05	0
OTU_2856	0	0	0	0	0	0	0	0	0	0	0	0	0	0	0	0	0	0	0	4.24773e-05	0	0	0	0	0	0	0	0	0	0	0	0	0	0	0	0	0	0	0	0	0	0	0.000509727	0	0.00046725	0	0	0	0
OTU_2857	0	0	0	0	0	0	0	0	0	0	0	0	0	0	0	0	0	0	0	0	0	0	0	0	0	0	0	0	0	0	0	0	0	0	0	0	0	0	0	0	0	0	0	0	0	0	0	0	0
OTU_2858	0	0	0	0	0	0	0	0	0	0	0	0	0	0	0	0	0	0	0	0	0	0	0	0	0	0	0	0	0	0	0	0	0	0	0	0	0	0	0	0	0	0	0	0	0	0	0	0	0
OTU_2859	0	0	0	0	0	0	0	0	0	0	0	0	0	0	0	0	0	0	0	0	0	0	0	0	0	0	0	0	0	0	0	0	0	0	0	0	0	0	0	0	0	0	0	0.00118936	0	0	4.24773e-05	0	0
OTU_286	0	0	0	0	0	0	0	0	0	0	0	0	0	0	0	0	0	0	0	0	0	0	0	0	0	0	0	0	0	0	0	0	0	0	0	0	0	0	0	0	0	0	0	0	0	0	0	0	0
OTU_2860	0	0	0	0	0	0	4.24773e-05	0	4.24773e-05	0.000297341	0.00046725	0.000169909	4.24773e-05	0.000127432	4.24773e-05	0	0	0	0	0	0	0	0	0	0	0	0	0	0	0	0	0	0	0	0	0	0	0	0	4.24773e-05	0	0	0	0	0	0	0	0	0
OTU_2861	0	0	0	8.49545e-05	0	0	4.24773e-05	0	4.24773e-05	4.24773e-05	0	0	0	0	0	0	0	0.000169909	0	0	0	4.24773e-05	4.24773e-05	4.24773e-05	0	4.24773e-05	0	0	0	0	0	0	0	0	0	0	0	4.24773e-05	0	0	0	0	8.49545e-05	4.24773e-05	0	4.24773e-05	0.000212386	0.000424773	0.00331323
OTU_2862	0	0	0	0	0	0	0	0	0	0	0	0	0	0	0	0	0	0	0	0	0	0	0	0	0	0	0	0	0	0	0	0	0	0	0	0	0	0	0	0	0	0	0	0	0	0	4.24773e-05	0	0
OTU_2863	0	0	0	0	0	0	0	0	0	0	0	0	0	0	0	0	0	0	0	0	0	0	0	0	0	0	0	0	0	0	0	0	0	0	0	0	0	0	0	0	0	0	0	0	0	0	0	0	0
OTU_2864	0	0	0	0	0	0	0	0	0	0	0	0	0	0	0	0	0	0	0	0	0	0	0	0	0	0	0	0	0	0	0	0	0	0	0	0	0	0	0	0	0	0	0	0	0	0	0	0	0
OTU_2865	0	0	0	0	0	0	0	0	0	0	0	0	0	0	0	0	0	0	0	0	0	0	0	0	0	0	0	0	0	0	0	0	0	0	0	0	0	0	0	0	0	0	0	0	0	0	0	0.000169909	0
OTU_2866	0	0	0	0	0	0	0	0	0	0	0	0	0	0	0	0	0	0	0	0	0	0	0	0	0	0	0	0	0	0	0	0	0	0	0	0	0	0	0	0	0	0	0	0	0	0	4.24773e-05	4.24773e-05	0
OTU_2867	0	0	0	0	0	0	0	0	0	0	0	0	0	0	0	0	0	0	0	0	0	0	0	0	0	0	0	0	0	0	0	0	0	0	0	0	0	0	0	0	0	0	0	0	0	0	0	0	0
OTU_2868	0	0	0	0	0	0	0	0	0	0	0	0	0	0	0	0	0	0	0	0	0	0	0	0	0	0	0	0	0	0	0	0	0	0	0	0	0	0	0	0	0	0	0	0	4.24773e-05	0	0	0	0
OTU_2869	0.000127432	0.000127432	0.000169909	4.24773e-05	0	0.00157166	0.000254864	0.000892023	0	0.0009345	8.49545e-05	0.000594682	0.000679636	0.000297341	0.000254864	0.00165661	0.000552205	0.000424773	0.0028035	0.00352561	0.00671141	0.00212386	0.00152918	0.000807068	0.00301589	0.00199643	0.00433268	0.0022513	0.0907315	0.00378048	0.00250616	0.00314332	0.00169909	0.00441764	0.00875032	0.0105344	0.0899244	0.0812165	0.0828307	0.00471498	0.0107892	0.00875032	4.24773e-05	0	0	0.000127432	0.00118936	0.000127432	0.000509727
OTU_287	0	0	0	0	0	0	0	0	0	0	0	0	0	0	0	0	0	0	0	0	0	0	0	0	0	0	0	0	0	0	0	0	0	0	0	0	0	0	0	0	0	0	0	0	0	0	0	0	0
OTU_2870	0	0	0	0	0	0	0	0	0	0	0	0	4.24773e-05	0	0	0	0	0	0	0	0	0	0	0	0	0	0	0	0	0	0	0	0	0	0	0	0	0	0	0	0	0	0	4.24773e-05	0	0	0	0	0
OTU_2871	0	0	0	4.24773e-05	0	0	0	0	0	0	0	0	0	0	0	0	0	0	0	0	0	0	0	0	0	0	0	0	0	0	4.24773e-05	0	0	0	0	0	0	0	0	0	0	0	0	0	0	0	0	0	0
OTU_2872	0	0	0	0	0	0	0	0	0	0	0	0	0	0	0	0	0	0	0	0	0	0	0	0	0	0	0	0	0	0	0	0	0	0	0	0	0	0	0	0	0	0	0	0	0	0	0	0	0
OTU_2873	0	0	0	0	0	0	0	0	0	0	0	0	0	0	0	0	0	0	0	4.24773e-05	0	0	0	0	0	0	0	0	0	0	4.24773e-05	0	0	0	0	0	0	0	0	0	0	0	0	0	0	0	0	0	0
OTU_2874	0	0	0	0	0	0	0	0	0	0	0	0	0	0	0	0	0	0	0	0	0	0	0	0	0	0	0	0	0	0	0	0	0	0	0	0	0	0	0	0	0	0	8.49545e-05	0.000212386	0	0	0	0	0
OTU_2875	8.49545e-05	8.49545e-05	0.00110441	0	4.24773e-05	0.000254864	0.00118936	0	0	4.24773e-05	4.24773e-05	4.24773e-05	0	0	0.000552205	0	0	0	0	0	0	0	8.49545e-05	0	0	0.00114689	0	0	0.000254864	0	0	4.24773e-05	8.49545e-05	0.000424773	0	0.000254864	0.000212386	8.49545e-05	4.24773e-05	0	8.49545e-05	0	0	0.000127432	0	0	0.000212386	4.24773e-05	0.000127432
OTU_2876	0	0	0	0	0	0	0	0	0	0	0	0	0	0	0	0	0	0	0	0	0	0	0	0	0	0	0	0	0	0	0	0	0	0	0	0	0	0	0	0	0	0	0	0	0	0	0	0	0
OTU_2877	0	0	0	0	0	0	0	0	0	0	0	0	0	0	0	0	0	0	0	0	0	0	0	0	0	0	0	0	0	0	0	0	0	0	0	0	0	0	0	0	0	0	0	0	0	0	0	0	0
OTU_2878	0	0	4.24773e-05	0	0	0	0	0	0	0	0	0	0	0	0	0	0	0	0	0	0	0	0	0	0	0	0	0	0	0	0	0	0	0	0	0	0	0	0	0	0	0	0	4.24773e-05	0	0	0	0	0
OTU_2879	0	0	0	0	0	0	0	0	0	0	0	0	0	0	0	0	0	0	0	0	0	0	0	0	0	0	0	0	0	0	0	0	0	0	0	0	0	0	0	0	0	0	0	0	0	0	0	0	0
OTU_288	0	0	0	0	0	0	0	0	0	0	0	0	0	0	0	0	0	0	0	0	0	0	0	0	0	0	0	0	0	0	0	0	0	0	0	0	0	0	0	0	0	0	0	8.49545e-05	0	0	0	0	0
OTU_2880	0	0	0	0	0	0	0	0	0	0	0	0	0	0	0	0	0	0	0	0	0	0	0	0	0	0	0	0	0	0	0	0	0	0	0	0	0	0	0	0	0	0	0	0	0	0	0	0	0
OTU_2882	0	0	0	0	0	0	0	0	0	0	0	0	0	0	0	0	0	0	0	0	0	0	0	0	0	0	0	0	0	0	0	0	0	0	0	0	0	0	0	0	0	0	0	0	0	4.24773e-05	0	0	0
OTU_2883	0	0	0	0	0	0	4.24773e-05	4.24773e-05	0	0	0	0	0	0	0	0	4.24773e-05	0	0	0	0	0	0	4.24773e-05	4.24773e-05	0.000169909	4.24773e-05	8.49545e-05	0.000212386	8.49545e-05	0.000169909	0	0	0	0	0	0.000169909	0.00106193	0.000339818	0	0	0	0	0	0	0	0	0	0
OTU_2884	0	0	0	0	0	0	0	0	0	0	0	0	0	0	0	0	0	0	0	0	0	0	0	0	0	0	0	0	0	0	0	0	0	0	0	0	0	0	0	0	0	0	0	0	0	0	0	0	0
OTU_2885	0	0	0	0	0	0	0	0	0	0	0	0	0	0	0	0	0	0	0	0	0	0	0	0	0	0	0	0	0	0	0	0	0	0	0	0	0	0	0	0	0	0	0	0	0	0	0	0	0
OTU_2886	0	0	0	0	0	0	0	0	0	0	0	0	0	0	0	0	0	0	0	0	0	0	0	0	0	0	0	0	0	0	0	0	0	0	0	0	0	0	0	0	0	0	0	0	0	0	0	0	0
OTU_2887	0	0	0	0	0	0	0	0	0	0	0	0	0	0	0	0	0	0	0	0	0	0	0	0	0	0	0	0	0	0	0	0	0	0	0	0	0	0	0	0	0	0	0	0	0	0	0	0	0
OTU_2889	0	0	0	0	0	0	0.000169909	4.24773e-05	0	4.24773e-05	0	8.49545e-05	0	0	0	0.000127432	0	8.49545e-05	0.000169909	0.000382295	0.000169909	0	0	0	4.24773e-05	0.000212386	0.000212386	0.000169909	4.24773e-05	0	8.49545e-05	4.24773e-05	8.49545e-05	0.000169909	0.000254864	0.000212386	4.24773e-05	4.24773e-05	0.000212386	4.24773e-05	8.49545e-05	0.000127432	8.49545e-05	4.24773e-05	4.24773e-05	8.49545e-05	8.49545e-05	8.49545e-05	0
OTU_289	0	0	0	0	0	0	0	0	0	0	0	0	0	0	0	0	0	0	0	0	0	0	0	0	0	0	0	0	0	0	0	0	0	0	0	0	0	0	0	0	0	0	0	0	0	0	0	0	0
OTU_2890	0	0	0	0	0	0	0	0	0	0	0	0	0	0	0	0	0	0	0	0	0	0	0	0	0	0	0	0	0	0	0	0	0	0	0	0	0	0	0	0	0	0	0	0	0	0	0	0	0
OTU_2892	0	4.24773e-05	0	0	0	0	0	0	0	0	0	0	0	0	0	0	0	0	0	0	0	0	0	0	0	0	0	0	0	0	0	0	0	0	0	0	0	0	0	0	0	0	0.00157166	0.00110441	0.00169909	0	0	0	4.24773e-05
OTU_2893	0	0	0	0	0	0	0	0	0	0	0	0	0	0	0	0	0	0	0	0	0	0	0	0	0	0	0	0	0	0	0	0	0	0	0	0	0	0	0	0	0	0	0	0	0	0	0	0	0
OTU_2895	0	0	0	0	0	0	0	0	0	0	0	0	0	0	0	0	0	0	0	0	0	0	0	0	0	0	0	0	0	0	0	0	0	0	0	0	0	0	0	0	0	0	0	0	0	0	0	0	0
OTU_2898	0	0	0	0	0	0	0	0	0	0	0	0	0	0	0	0	0	0	0	0	0	0	0	0	0	0	0	0	0	0	0	0	0	0	0	0	0	0	0	0	0	0	0	0	0	0	0	0	0
OTU_2899	0	0	0	0	0	0	0	0	0	0	0	0	0	0	0	0	0	0	0	0	0	0	0	0	0	0	0	0	0	0	0	0	0	0	0	0	0	0	0	0	0	0	0	0	0	0	0	0	0
OTU_29	0	0	0	0	0	0	0	0	0	0	0	0	0	0	0	0	0	0	0	0	0	0	0	0	0	0	0	0	0	0	0	0	0	0	0	0	0	0	0	0	0	0	0	0	0	0	0	0	0
OTU_290	0	0	0	0	0	0	0	0	0	0	0	0	0	0	0	0	0	0	0	0	0	0	0	0	0	0	0	0	0	0	0	0	0	0	0	0	0	0	0	0	0	0	0	8.49545e-05	0	0	0	0	0
OTU_2900	0	0	0	0	0	0	0	0	0	0	0	0	0	0	0	0	0	0	0	0	0	0	0	0	0	0	0	0	0	0	0	0	0	0	0	0	0	0	0	0	0	0	0	0	0	0	0	0	0
OTU_2902	0	0	0	0	0	0	0	0	0	0	0	0	0	0	0	0	0	0	0	0	0	0	0	0	0	0	0	0	0	0	0	0	0	0	0	0	0	0	0	0	0	0	0	0	0	0	0	0	0
OTU_2903	0	0	0	0	0	0	0	0	0	0	0	0	0	0	0	0	0	0	0	0	0	0	0	0	0	0	0	0	0	0	0	0	0	0	0	0	0	0	0	0	0	0	0	0	0	0	0	0	0
OTU_2904	0	0	0	0	0	0	0	0	0	0	0	0	0	0	0	0	0	0	0	0	0	0	0	0	0	0	0	0	0	0	0	0	0	0	0	0	0	0	0	0	0	0	0	0	0	0	0	0	0
OTU_2905	0	0	0	0	0	0	0	0	0	0	0	0	0	0	0	0	0	0	0	0	0	0	0	0	0	0	0	0	0	0	0	0	0	0	0	0	0	0	0	0	0	0	0	0	0	0	0	0	0
OTU_2906	0	4.24773e-05	0	0	0.000127432	8.49545e-05	0	0	0	8.49545e-05	0.000382295	4.24773e-05	0	0.000127432	0.000339818	0	0	0	4.24773e-05	0	0	0	0	0	0	0	4.24773e-05	0	0	0	0	0	0	0	0	0	0	0	0	0	4.24773e-05	0	0	0	0	0	0	0	0
OTU_2909	0	0	0	0	0	4.24773e-05	0	0	0	0	0	0	0	0	0	4.24773e-05	0	0	0	0	0	0	0	0	0	0	0	0	0	0	0	0	0	0	0	4.24773e-05	0	0	0	0	0	0	0	0	0	0	0	0	0
OTU_291	0	0	0	0	4.24773e-05	0	0	0	0	0	0	0	0	0	0	0	0	0	0	0	0	0	0	0	0	0	0	0	0	0	0	0	0	0	0	0	0	0	0	0	0	0	0	0	0	0	0	0	0
OTU_2910	0	4.24773e-05	0	0	0	0	4.24773e-05	0.000339818	4.24773e-05	0.000594682	0.000127432	4.24773e-05	8.49545e-05	4.24773e-05	0	0	0	0	0	0	0	0.000594682	0.000127432	0	0	0	0	0	0	4.24773e-05	0.00046725	0	0	0	0	0	0	0.000722114	4.24773e-05	8.49545e-05	8.49545e-05	0	0	0	0	0	0	0	0.00046725
OTU_2911	0	0	0	0	0	0	0	0	0	0	0	0	0	0	0	0	0	0	0	0	0	0	0	0	0	0	0	0	0	0	0	0	0	0	0	0	0	0	0	0	0	0	0	0	0	0	0	0	0
OTU_2912	0	0	0	0	0	0	0	0	0	0	0	0	0	0	0	0	0	0	0	0	0	0	0	0	0	0	0	0	0	0	0	0	0	0	0	0	0	0	0	0	0	0	0.000764591	0.00339818	0	0	8.49545e-05	0	0
OTU_2913	0	0	0	0	0	0	0	0	0	0	0	0	0	0	0	0	0	0	0	0	0	0	0	0	0	0	0	0	0	0	0	0	0	0	0	0	0	0	0	0	0	0	0.00118936	0	0.00420525	0	0	0	0
OTU_2914	0	0	0	0	0	0	0	0	0	0	0	0	0	0	0	0	0	0	0	0	0	0	0	0	0	0	0	0	0	0	0	0	0	0	0	0	4.24773e-05	0	0	0	0	0	0	0	0	0	0	0	0
OTU_2915	0	0	0	0	0	0	0	0	0	0	0	0	0	0	0	0	0	0	0	0	0	0	0	0	0	0	0	0	0	0	0	0	0	0	0	0	0	0	0	0	0	0	0	0	0	0	0	0	0
OTU_2916	0	0	0	0	0	0	0	0	0	0	0	0	0	0	0	0	0	0	0	0	0	0	0	0	0	0	0	0	0	0	0	0	0	0	0	0	0	0	0	0	0	0	0	0	0.00174157	0	0	0	4.24773e-05
OTU_2917	0	4.24773e-05	0.000254864	0	0	8.49545e-05	0.000849545	0.000297341	4.24773e-05	0.000254864	8.49545e-05	0.000127432	0.000254864	0	0.000254864	0.000339818	0	0.000212386	0.000254864	0.000212386	0.000254864	8.49545e-05	0	4.24773e-05	4.24773e-05	4.24773e-05	4.24773e-05	0.000169909	0.000127432	8.49545e-05	0	0.000127432	8.49545e-05	0.000212386	0.000127432	0.000297341	0.000297341	4.24773e-05	0.000509727	0.000169909	0.000297341	0.000127432	0	0	0	4.24773e-05	4.24773e-05	8.49545e-05	4.24773e-05
OTU_2918	0	0	0	0	0	0	0	0	0	0	0	0	0	0	0	0	0	0	0	0	0	0	0	0	0	0	0	0	0	0	0	0	0	0	0	0	0	0	0	0	0	0	0	0	0	0	0	0	0
OTU_2919	0	0	0	0	0	0	0	0	0	0	0	0	0	0	0	0	0	0	0	0	0	0	0	0	0	0	0	0	0	0	0	0	0	0	0	0	0	0	0	0	0	0	0.000212386	0.000594682	0.000127432	0	4.24773e-05	4.24773e-05	0
OTU_2920	0	0	0	0	0	0	0	0	0	0	0	0	0	0	0	0	0	0	0	0	0	0	0	0	0	0	0	0	0	0	0	0	0	0	0	0	0	0	0	0	0	0	0	0	0	0	0	0	0
OTU_2921	0	0	0	0	0	0	0	0	0	0	0.000509727	0	0	0	4.24773e-05	0	0	0	0	0	0	0	0	0	0	0	0	0	0	0	0	8.49545e-05	0	0	0	0	0	0	0	0	0	0	0	0	0	0	0	0	0
OTU_2922	0	0	0	0	0	0	0	0	0	0	0	0	0	0	0	0	0	0	0	0	0	0	0	0	0	0	0	0	0	0	0	0	0	0	0	0	0	0	0	0	0	0	0	0	0	0	0	0	0
OTU_2923	0	0	0	0	0	0	0	0	0	0	0	0	0	0	0	0	0	0	0	0	0	0	0	0	0	0	0	0	0	0	0	0	0	0	0	0	0	0	0	0	0	0	0	0	0	0	0	0	0
OTU_2924	0	0	0	0	0	0	0	0	0	0	0	0	0	0	0	0	0	0	0	0	0	0	0	0	0	0	0	0	0	0	0	0	0	0	0	0	0	0	0	0	0	0	0	0	0	0	0	0	0
OTU_2925	0	0	0	0	4.24773e-05	4.24773e-05	0	0	0	0	0	0	0	0	0	0	0	0	0	0	0	0	0	0	0.000127432	4.24773e-05	0	0	0	0	0	0	0	0	4.24773e-05	0	4.24773e-05	0	0	0	0	0	0.00790077	0.00798573	0.00628664	0.000722114	0.00123184	0.00127432	4.24773e-05
OTU_2926	0	0	0	0	0	0	0	0	0	0	0	0	0	0	0	0	0	0	0	0	0	0	0	0	0	0	0	0	0	0	0	0	0	0	0	0	0	0	0	0	0	0	0	0	0	0	0	0	0
OTU_2927	0	0	0	0	0	0	0	0	0	0	0	0	0	0	0	0	0	0	0	0	0	0	0	0	0	0	0	0	0	0	0	0	0	0	0	0	0	0	0	0	0	0	0	0	4.24773e-05	0	0	0	0
OTU_2928	0	0	0	0	0	0	0	0	0	0	0	0	0	0	0	0	0	0	0	0	0	0	0	0	0	0	0	0	0	0	0	0	0	0	0	0	0	0	0	0	0	0	0	0	0	0	0	0	0
OTU_2929	0	0	0	0	0	0	0	0	0	0	0	0	0	0	0	0	0	0	0	0	0	0	0	0	0	0	0	0	0	0	0	0	0	0	0	0	0	0	0	0	0	0	0	0	0	0	0	0	0
OTU_293	0	0	0	0	0	0	0	0	0	0	0	0	0	0	0	0	0	0	0	0	0	0	0	0	0	0	0	0	0	0	0	0	0	0	0	0	0	0	0	0	0	0	0	0	0	0	0	0	0
OTU_2930	0	0	0	0	0	0	0	0	0	0	0	0	0	0	0	0	0	0	0	0	0	0	0	0	0	0	0	0	0	0	0	0	0	0	0	0	0	0	0	0	0	0	0	0	0	0	0	0	0
OTU_2931	0	0	0	0.000679636	0	0	0	0	0.000382295	4.24773e-05	0	0.000169909	8.49545e-05	0	0	0	0	0	0	0	0	4.24773e-05	0	0	0	0	0	4.24773e-05	0	0	0	0	4.24773e-05	0	0	0	0	0	4.24773e-05	4.24773e-05	0.000254864	0	0	0	0	0	0	0	0
OTU_2932	0	0	0	0	0	0	0	0	0	0	0	0	0	0	0	0	0	0	0	0	0	0	0	0	0	0	0	0	0	0	0	0	0	0	0	0	0	0	0	0	0	0	0	0	0	0	0	0	0
OTU_2933	0	0	0	0	0	0	0	0	0	0	0	0	0	0	0	0	0	0	0	0	0	0	0	0	0	0	0	0	0	0	0	0	0	0	0	0	0	0	0	0	0	0	0	0	0	0	0	0	0
OTU_2934	0	0	0	0	0	0	0	0	0	0	0	0	0	0	0	0	0	0	0	0	0	0	0	0	0	0	0	0	0	0	0	0	0	0	0	0	0	0	0	0	0	0	0	0	0	0	0	0	0
OTU_2935	0	0	0	0	0	0	0	0	0	0	0	0	4.24773e-05	0	0	0	0	0	0	0	0	0	0	0	0	0	0	0	0	0	0	0	0	0	0	0	0	0	0	0	0	0	0	0	0	0	0	0	0
OTU_2936	0	0.000339818	0.000212386	4.24773e-05	0	0.000127432	0.0243395	0.0070937	0.00518223	0.000594682	0.000594682	0.000297341	0.000382295	0.000169909	0.000297341	0.000254864	4.24773e-05	0.000424773	0.000127432	4.24773e-05	0	0.000127432	0	0	0	8.49545e-05	0	8.49545e-05	0	4.24773e-05	0.000127432	0	0	8.49545e-05	4.24773e-05	0	0	0.000339818	0	0	0	0	0.000297341	0.000382295	0.000127432	0.00046725	0.000594682	4.24773e-05	0.000169909
OTU_2937	0	0	0	0	0	0	0	0	4.24773e-05	0	0	0	0	0	0	0	0	0	0	0	0	0	0	0	0	0	0	0	0	0	0	0	0	0	0	0	0	0	0	0	0	0	0.000509727	8.49545e-05	0	4.24773e-05	0	0	0.000127432
OTU_2938	0	0	0	0	0	0	0	0	0	0	0	0	0	0	0	0	0	0	0	0	0	0	0	0	0	0	0	0	0	0	0	0	0	0	0	0	0	0	0	0	0	0	0	0	0	0	0	0	0
OTU_294	0	0	0	0	0	0	0	4.24773e-05	0	8.49545e-05	0	0	0	0	0	0	0	0	0	0	0	4.24773e-05	0	0	0	0	0	0	0	0	0.000127432	0	0	0	0	0	0	8.49545e-05	0	0	0	0	0	0	0	0	0	0	0
OTU_2940	0	0	0	0	0	0	0	0	0	0	0	0	0	0	0	0	0	0	0	0	0	0	0	0	0	0	0	0	0	0	0	0	0	0	0	0	0	0	0	0	0	0	0	0	0	0	0	0	0
OTU_2941	0	0	0	0	0	0	0	0	0	0	0	0	0	0	0	0	0	0	0	0	0	0	0	0	0	0	0	0	0	0	0	0	0	0	0	0	0	0	0	0	0	0	0	0	0	0	0	0	0
OTU_2942	0	0	0	0	0	0	0	0	0	0	0	0	0	0	0	0	0	0	0	0	0	0	0	0	0	0	0	0	0	0	0	0	0	0	0	0	0	0	0	0	0	0	0	0	0	0	0	0	0
OTU_2944	0	0	0	0	0	0	0	0	0	0	0	0	0	0	0	0	0	0	0	0	0	0	0	0	0	0	0	0	0	0	0	0	0	0	0	0	0	0	0	0	0	0	0	0	0	0	0	0	0
OTU_2946	0	0	0	0	0	0	0	0	0	0	0	0	0	0	0	0	0	0	0	0	0	0	0	0	0	0	0	0	0	0	0	0	0	0	0	0	0	0	0	0	0	0	0	0	0	0	0	0	0
OTU_2947	0	0	0	0	0	0	0	0	0	0	0	0	0	0	0	0	0	0	0	0	0	0	0	0	0	0	0	0	0	0	0	0	0	0	0	0	0	0	0	0	0	0	0	0	0	0	0	0	0
OTU_2948	0	0	0	0	0	0	0	0	0	0	0	0	0	0	0	0	0	0	0	0	0	0	0	0	0	0	0	0	0	0	0	0	0	0	0	0	0	0	0	0	0	0	0	0	0	0	0	0	0
OTU_2949	0	0	0	0	0	0	0	0	0	0	0	0	0	0	0	0	0	0	0	0	0	0	0	0	0	0	0	0	0	0	0	0	0	0	0	0	0	0	0	0	0	0	0	0	8.49545e-05	0	0	0	0
OTU_2950	0	0	0	0	0	0	0	0	0	0	0	0	0	0	0	0	0	0	0	0	0	0	0	0	0	0	0	0	0	0	0	0	0	0	0	0	0	0	0	0	0	0	0	0	0	0	0	0	0
OTU_2951	0	0	0	0	0	0	0	0	0	0	0	0	0	0	0	0	0	0	0	0	0	0	0	0	0	0	0	0	0	0	0	0	0	0	0	0	0	0	0	0	0	0	0	0	0	0	0	0	0
OTU_2952	0	0	0.000212386	4.24773e-05	4.24773e-05	4.24773e-05	0	0	0	0	0	0	0	0	0	0	0	0	0	4.24773e-05	0	0	8.49545e-05	0	4.24773e-05	0	0.000254864	0	0.000339818	0	0	0	0	0	0	0.000127432	0.000169909	0	0	4.24773e-05	0	0	0	0	0	0	4.24773e-05	0	0
OTU_2953	0	0	0	0	0	0	0	0	0	0	0	0	0	0	0	0	0	0	0	0	0	0	0	0	0	0	0	0	0	0	0	0	0	0	0	0	0	0	0	0	0	0	0	0	0	4.24773e-05	0	0	0
OTU_2954	0	0	0	0	0	0	0	0	0	0	0	0	0	0	0	0	0	0	0	0	0	0	0	0	0	0	0	0	0	0	0	0	0	0	0	0	0	0	0	0	0	0	0	4.24773e-05	0	0	4.24773e-05	0	0
OTU_2956	0	0	0	0	0	0	0	0	0	0	0	0	0	0	0	0	0	0	0	0	0	0	0	0	0	0	0	0	0	0	0	0	0	0	0	0	0	0	0	0	0	0	0	0	0	0	0	0	0
OTU_2957	0	0	0	0	0	0	0	0	0	0	0	0	0	0	0	0	0	0	0	0	0	0	0	0	0	0	0	0	0	0	0	0	0	0	0	0	0	0	0	0	0	0	0	0	0	0	0	0	0
OTU_2958	0	0	0	0	0	0	0	0	0	0	0	0	0	0	0	0	0	4.24773e-05	0	0	8.49545e-05	0	0	0	0	4.24773e-05	0	0	0	0	0	0	0	0	4.24773e-05	4.24773e-05	0	0	0	0	0	0.000127432	8.49545e-05	0	0	0	0	0	0
OTU_2959	0	0	0	0	0	0	0	0	0	0	0	0	0	0	0	0	0	0	0	0	0	0	0	0	0	0	0	0	0	0	0	0	0	0	0	0	0	0	0	0	0	0	0	0	0	0	0	0	0
OTU_296	0	0	0	0	0	0	0	0	0	0	0	0	0	0	0	0	0	0	0	8.49545e-05	0	0	0	0	0	0	0	0	0	0	0	0	0	0	0	0	0	4.24773e-05	0	0	0	0	0	4.24773e-05	0	0	0	0	0
OTU_2962	0	0	0	0	8.49545e-05	4.24773e-05	0	0	4.24773e-05	0.00046725	0	0	4.24773e-05	0.000254864	0.000424773	0.00046725	0.000339818	0.0028035	0	0	0	0	0	0	4.24773e-05	0	0.000212386	0	0	0	4.24773e-05	0	4.24773e-05	0	4.24773e-05	0	0	0	0	0	0	0	0	0	0	0	0	0	0
OTU_2963	0	0	0	0	0	0	0	0	0	0	0	0	0	0	0	0	0	0	0	0	0	0	0	0	0	0	0	0	0	0	0	0	0	0	0	0	0	0	0	0	0	0	0	0	0	0	0	0	0
OTU_2964	0	0	0	0	0	0	0	0	0	0	0	0	0	0	0	0	0	0	0	0	0	0	0	0	0	0	0	0	0	0	0	0	0	0	0	0	0	0	0	0	0	0	0	0	0	0	0	0	0
OTU_2965	0	0	0	0	0	0	0	0	0	0	0	0	0	0	0	0	0	0	0	0	0	0	0	0	0	0	0	0	0	0	0	0	0	0	0	0	0	0	0	0	0	0	0	0	0	0	0	0	0
OTU_2969	0	0	0	0	0	0	0	0	0	0	0	0	0	0	0	0	0	0	0	0	0	0	0	0	0	0	0	0	0	0	0	0	0	0	0	0	0	0	0	0	0	0	0	0	0	0	0	0	0
OTU_297	0	0	0	0	0	0	0	0	0	0	0	0	0	0	0	0	0	0	0	0	0	0	0	0	0	0	0	0	0	0	0	0	0	0	0	0	0	0	0	0	0	0	0	0	0	0	0	0	0
OTU_2971	0	0	0	0	0	0	0	0	0	0	0	0	0	0	0	0	0	0	0	0	0	0	0	0	0	0	0	0	0	0	0	0	0	0	0	0	0	0	0	0	0	0	8.49545e-05	0	0	0	0	0	0
OTU_2972	0	0	0	0	0	0	0	0	0	0	0	0	0	0	0	0	0	0	0	0	0	0	0	0	0	0	0	0	0	0	0	0	0	0	0	0	0	0	0	0	0	0	0	8.49545e-05	4.24773e-05	0	0	0	0
OTU_2974	0	0	0	0	0	0	0	0	0	0	0	0	0	0	0	0	0	0	4.24773e-05	0	4.24773e-05	0	0	0	0	0	0	0	0	0	4.24773e-05	0	0	0	0	0	0	0	4.24773e-05	0	0	0	0	0	0	0	0	0	0
OTU_2975	0	0	0	0	0	0	0	0	0	0	0	0	0	0	0	0	0	0	0	0	0	0	0	0	0	0	0	0	0	0	0	0	0	0	0	0	0	4.24773e-05	0	0	0	0	0	0	0	0	0	0	0
OTU_2976	0	0	0	8.49545e-05	0	0	0	0	0	0	0	0	0	0	0	0	0	0	0	0	0	0	0	0	0	0	0	0	0	0	0	0	0	0	0	0	0	0	0	0	0	0	0.000212386	8.49545e-05	0.000297341	4.24773e-05	0	0	4.24773e-05
OTU_2977	0	0	0	0	0	0	0	0	0	0	0	0	0	0	0	0	0	0	0	0	0	0	0	0	0	0	0	0	0	0	0	0	0	0	0	0	0	0	0	0	0	0	0	0	0	0	0	0	0
OTU_2978	0	0	0	0	0	0	0	0	0	0	0	0	0	0	0	0	0	0	0	0	0	0	0	0	0	0	0	0	0	0	0	0	0	0	0	0	0	0	0	0	0	0	0	0	0	0	0	0	0
OTU_2979	0	0	0	0	0	0	0	0	0	0	0	0	0	0	0	0	0	0	0	0	0	0	0	0	0	0	0	0	0	0	0	0	0	0	0	0	0	0	0	0	0	0	0.000169909	4.24773e-05	0	0	0	0	0
OTU_298	0	0	0	0	0	0	0	0	0	0	0	0	0	0	0	0	0	0	0	0	0	0	0	0	0	0	0	0	0	0	0	0	0	0	0	0	0	0	0	0	0	0	0	0	0	0	0	0	0
OTU_2980	0	0	0	0	0	0	0	0	0	0	0	0	0	0	0	4.24773e-05	0	0	0	0	0	0	0	0	0	0	0	0	0	0	0	0	0	0	0	0	0	0	0	0	0	0	0	4.24773e-05	0	0	0	0	0
OTU_2981	0	0	0	0	0	0	0	0	0	0	0	0	0	0	0	0	0	0	0	0	0	0	0	0	0	0	0	0	0	0	0	0	0	0	0	0	0	0	0	0	0	0	0	4.24773e-05	0.000212386	0	0	0	4.24773e-05
OTU_2982	0	0	0	0	0	0	0	4.24773e-05	0	0	0	0	0	0	0	0	0	0	4.24773e-05	0	4.24773e-05	0	0	0	0	0	0	0	0	0	4.24773e-05	0	0	4.24773e-05	4.24773e-05	4.24773e-05	4.24773e-05	0	8.49545e-05	0	8.49545e-05	0	0	0	0	0	0	0	0
OTU_2983	0	0	0	0	0	0	0	0	0	0	0	0	0	0	0	0	0	0	0	0	0	0	0	0	0	0	0	0	0	0	0	0	0	0	0	0	0	0	0	0	0	0	0	4.24773e-05	0.000254864	0	0	0	0
OTU_2984	0	0	0	0	0	0	0	0	0	0	4.24773e-05	0	0	0	0	0	0	0	0	0	0	0	0	0	0	0	0	0	0	0	0	0	0	0	0	0	0	0	0	4.24773e-05	4.24773e-05	0	0	0	0	0	0	0	0
OTU_2985	0	0	0	0	0	0	0	0	0	0	0	0	0	0	0	0	0	0	0	0	0	0	0	0	0	0	0	0	0	0	0	0	0	0	0	0	0	0	0	0	0	0	0	0	0	0	0	0	0
OTU_2986	0	0	0	0	0	0	0	0	0	0	0	0	0	0	0	0	0	0	0	0	0	0	0	0	0	0	0	0	0	0	0	0	0	0	0	0	0	0	0	0	0	0	0	0	0	0	0	0	0
OTU_2987	0	0	0	0	0	0	0	0	0	8.49545e-05	4.24773e-05	0	0	4.24773e-05	8.49545e-05	0	0	0	0	0	0	0	0	0	0	0	0	0	0	0	0	0	0	0	0	0	0	0	0	0	0	0	0	0	0	0	0	0	0
OTU_2988	0	0	0	0	0	0	0	0	0	0	0	0	0	0	0	0	0	0	0	0	0	0	0	0	0	0	0	0	0	0	0	0	0	0	0	0	0	0	0	0	0	0	0	0	0	0	0	0	0
OTU_2989	0	0	0	0	0	0	0	0	0	0	0	0	0	0	0	0	0	0	0	0	0	0	0	0	0	0	0	0	0	0	0	0	0	0	0	0	0	0	0	0	0	0	0	0	0	0	0	0	0
OTU_299	0	0	0	0	0	0	0	0	0	0	0	0	0	0	0	0	0	0	0	0	0	0	0	0	0	0	0	0	0	0	0	0	0	0	0	0	0	0	0	0	0	0	0	0	0	0	0	0	0
OTU_2990	0	0	0	0	0	0	0	0	0	0	0	0	0	0	0	0	0	0	0	0	0	0	0	0	0	0	0	0	0	0	0	0	4.24773e-05	0	0	0	0	0	0	0	0	0	0	0	0	0	0	0	0
OTU_2991	0	4.24773e-05	0	0	0	0	0.000764591	0.000169909	0.000509727	4.24773e-05	8.49545e-05	0	4.24773e-05	0	8.49545e-05	0.000127432	0.000127432	0.00824059	0	0	4.24773e-05	0	4.24773e-05	0	0	4.24773e-05	4.24773e-05	0	0	0	0	0	4.24773e-05	0	0.000212386	0.000339818	0	0	0	0	0	0	0	0	0	0	0	0	0
OTU_2992	0	0	0	0	0	0	0	0	0	0	0	0	0	0	0	8.49545e-05	0	0	0	0	0	0	0	0	0	0	0	0	0	0	0	0	0	0	0	0	0	0	0	0	0	0	0	0.000339818	0.000212386	0	0	0	0
OTU_2993	0	0	0	0	0	0	0	0	0	0	0	0	0	0	0	0	0	0	0	0	0	0	0	0	0	0	0	0	0	0	0	0	0	0	0	0	0	0	0	0	0	0	0	0	0	0	0	0	0
OTU_2994	0	0	0	0	0	0	8.49545e-05	0	0	0	0	0	0	0	0	0	0	0.00046725	0	0	0	0	0	0	0	0	0	0	0	0	0	0	0	0	0.000127432	0	0	0	0	4.24773e-05	0	0	4.24773e-05	0	0	0	0	0	0
OTU_2995	0	0	0	0	0	0	0	0	0	0	0	0	0	0	0	0	0	0	0	4.24773e-05	0	0	0	0	0	0	0	0	0	0	0	0	0	0	0	0	0	0	0	0	0	0	0	0	4.24773e-05	0	0	0	0
OTU_2996	0	0	0	0	0	0	0	0	0	0	0	0	0	0	0	0	0	0	0	0	0	0	0	0	0	0	0	0	0	0	0	0	0	0	0	0	0	0	0	0	0	0	0	0	0	0	0	0	0
OTU_2997	0	0	0	0	0	0	0	0	0	0	0	0	0	0	0	0	0	0	0	0	0	0	0	0	0	0	0	0	0	0	0	0	0	0	0	0	0	0	0	0	0	0	0	0	0	0	0	0	0
OTU_2998	0	0	0	0	0	0	0	0	0	0	0	0	0	0	0	0	0	0	0	0	0	0	0	0	0	0	0	0	0	0	0	0	0	0	0	0	0	0	0	0	0	0	0	0	0	0	0	0	0
OTU_2999	0	0	0	0	0	0	0	0	0	0	0	0	0	0	0	0	0	0	0	0	0	0	0	0	0	0	0	0	0	0	0	0	0	0	0	0	0	0	0	0	0	0	0	0	0	0	0	0	0
OTU_3	0.000722114	0.00191148	0.000722114	0.00496984	0.000127432	0.000637159	0.00106193	0.000509727	0.00165661	0.00764591	0.00683884	0.00454507	0.00530966	0.00662645	0.00573443	8.49545e-05	0	8.49545e-05	0	0	0	0.000424773	0.000849545	0.000382295	0	0.000594682	0	0.000169909	0	4.24773e-05	0.000169909	0.000764591	0.000722114	0.000339818	0	0	8.49545e-05	0.000382295	0.000339818	0.000679636	0.000339818	0.0009345	8.49545e-05	0	0	0	0	4.24773e-05	0.00195395
OTU_30	0	0	0	0	0	0	0	0	0	4.24773e-05	0	0	0	0	0	0	0	0	4.24773e-05	0	0	4.24773e-05	0	0	0	0	0	0	0	0	0.0013168	4.24773e-05	0	0	0	0	0	0	0	0	0	0	0	0	0	0	0	0	0
OTU_300	0	0	0	0	0	0	0	0	0	0	0	0	0	0	0	0	0	0	0	0	0	0	0	0	0	0	0	0	0	0	0	0	0	0	0	0	0	0	0	0	0	0	0	0	0	0	0	0	0
OTU_3000	0	0	0	0	0	0	0	0	0	0	0	0	0	0	0	0	0	0	0	0	0	0	0	0	0	0	0	0	0	0	0	0	0	0	0	0	0	0	0	0	0	0	0	0	0	0	0	0	0
OTU_3001	0	0	0	0	0	0	0	0	0	0	0	0	0	0	0	0	0	0	0	0	0	0	0	0	0	0	0	0	0	0	0	0	0	0	0	0	0	0	0	0	0	0	0	0	0	0	0	0	0
OTU_3002	0	0	0	0	0	0	0	0	0	0	0	0	0	0	0	0	0	0	0	0	0	0	0	0	0	0	0	0	0	0	0	0	0	0	0	0	0	0	0	0	0	0	0	0	0	0	0	0	0
OTU_3004	0	0	0	0	0	0	0	0	0	0	0	0	0	0	0	0	0	0	0	0	0	0	0	0	0	0	0	0	0	0	0	0	0	0	0	0	0	0	0	0	0	0	0	0	0	0	0	0	0
OTU_3005	0	0	0	0	0	0	0	0	0	0	0	0	0	0	0	0	0	0	0	0	0	0	0	0	0	0	0	0	0	0	0	0	0	0	0	0	0	0	0	0	0	0	0	0	0	4.24773e-05	0	0	0
OTU_3006	0	4.24773e-05	0	0	0	0	0	0	0	0	0	0	0	0	0	0	0	0	0	0	0	0	0	0	0	0	0	0	0	0	0	0	0	0	0	0	0	0	0	0	0	0	0	0	0	0	0	0	0
OTU_3007	0	0	0	0	0	0	0	0	0	0	0	0	0	0	0	0	0	0	0	0	0	0	0	0	0	0	0	0	0	0	0	0	0	0	0	0	0	0	0	0	0	0	0	0	0	0	0	0	0
OTU_3008	0	0	0	0	0	0	0	0	0	0	0	0	0	0	0	0	0	0	0	0	0	0	0	0	0	0	0	0	0	0	0	0	0	0	0	0	0	0	0	0	0	0	0	0	0	0	0	0	0
OTU_3009	0	0	0	0	0	0	0	0	0	0	0	0	0	0	0	0	0	0	0	0	0	0	0	0	0	0	0	0	0	0	0	0	0	0	0	0	0	0	0	0	0	0	0	0	0	0	0	0	0
OTU_301	0	0	0	0	0	0	0	0	0	0	0	0	0	0	0	0	0	0	0	0	0	0	0	0	0	0	0	0	0	0	0	0	0	0	0	0	0	0	0	0	0	0	0	0	0	0	0	0	0
OTU_3010	0	0	0	0	0	0	0	0	0	0	0	0	0	0	0	4.24773e-05	4.24773e-05	0	0	0	0	0	0	0	0	0	0	0	0	0	0	0	0	0	0	0	4.24773e-05	0	0	0	0	0	0	0	0	0	0	0	0
OTU_3011	0	0	0	0	0	0	0	0	0	0	0	0	0	0	0	0	0	0	0	0	0	0	0	0	0	0	0	0	0	0	0	0	0	0	0	0	0	0	0	0	0	0	0	0	0	0	0	0	0
OTU_3013	0	0	0	0	0	0	0	0	0	0	0	0	0	0	0	0	0	0	0	0	0	0	0	0	4.24773e-05	0	0	0	0	0	0	0.000169909	0	0	0	0	0	0	4.24773e-05	0	0	0	0	0	0	0	0	0	0
OTU_3014	0	0	0	0	0	0	0	0	0	0	0	0	0	0	0	0	0	0	0	0	0	0	0	0	0	0	0	0	0	0	0	0	0	0	0	0	0	0	0	0	0	0	0	0	0	0	0	0	0
OTU_3015	0	0	0	0	0	0	0	0	0	0	0	0	0	0	0	0	0	0	0	0	0	0	0	0	0	0	0	0	0	0	0	0	0	0	0	0	0	0	0	0	0	0	0	0	0	0	0	0	0
OTU_3017	0	4.24773e-05	0	0	0	4.24773e-05	4.24773e-05	0	0	4.24773e-05	4.24773e-05	0	4.24773e-05	0	0	4.24773e-05	4.24773e-05	0	8.49545e-05	4.24773e-05	0.000297341	0	0	4.24773e-05	0	8.49545e-05	4.24773e-05	0	0	4.24773e-05	0	0	0	0.000297341	0.000169909	0.000212386	0.000339818	4.24773e-05	0.000212386	4.24773e-05	0.000127432	4.24773e-05	0.000127432	0.000297341	4.24773e-05	8.49545e-05	4.24773e-05	8.49545e-05	0
OTU_3018	0	0	0	0	0	0	0	0	0	0	0	0	0	0	0	0	0	0	0	0	0	0	0	0	0	0	0	0	0	0	0	0	0	0	0	0	0	0	0	0	0	0	4.24773e-05	0.000424773	0.000169909	0	4.24773e-05	0	0
[truncated: 1,926 more rows]
[truncated: 36 more columns]
